# Supplementary material for: GSK3 Inhibitors Regulate MYCN mRNA Levels and Reduce Neuroblastoma Cell Viability through Multiple Mechanisms, Including p53 and Wnt Signaling
Source: Oxford University Press journal article supplement (doi:10.1158/1535-7163.mct-13-0560-t), 2013-11-27
Supplement: 15357163mct130560t-sup-tab_4b.xlsx [file 15357163mct130560t-sup-tab_4b.xlsx]

## Sheet: imr32-c.vs.azak.txt
Sample Info:	IMR32 cells. Control Vs 24h 1-Azakenpaullone
Sequencing:	Illumina GA IIx, read length: 42 bp, paired-end mRNA sequencing
Mapping:	aligned with TopHat v2.0.7 to GRCh37 (hg19)
Summarization:	Htseq-count
Method for differential gene expression analysis:	General linear model (GLM) in edgeR (R/bioconductor) based on filtered count data, fit: ~treatment
Multiple testing correction:	Benjamini-Hochberg
Gene expression unit:	CPMkb: counts per million per genelength in kilobases
Table:	Differentially expressed genes: Azak vs Control
Ensembl ID	Gene Symbol	Description	log2FC	logCPM	LR	PValue	Corrected Pvalue
ENSG00000099250	NRP1	neuropilin 1 [Source:HGNC Symbol;Acc:8004]	1.63911	6.92593	440.993	6.58225e-98	9.74765e-94
ENSG00000150593	PDCD4	programmed cell death 4 (neoplastic transformation inhibitor) [Source:HGNC Symbol;Acc:8763]	-1.65654	5.28042	320.152	1.34196e-71	9.93655e-68
ENSG00000114796	KLHL24	kelch-like 24 (Drosophila) [Source:HGNC Symbol;Acc:25947]	-1.67759	4.91278	265.591	1.03706e-59	5.11928e-56
ENSG00000127863	TNFRSF19	tumor necrosis factor receptor superfamily, member 19 [Source:HGNC Symbol;Acc:11915]	1.68167	6.10849	225.283	6.36815e-51	2.35765e-47
ENSG00000104765	BNIP3L	BCL2/adenovirus E1B 19kDa interacting protein 3-like [Source:HGNC Symbol;Acc:1085]	-1.13155	6.30732	193.098	6.70102e-44	1.98471e-40
ENSG00000188554	NBR1	neighbor of BRCA1 gene 1 [Source:HGNC Symbol;Acc:6746]	-0.916366	6.89858	177.418	1.77517e-40	4.38141e-37
ENSG00000164938	TP53INP1	tumor protein p53 inducible nuclear protein 1 [Source:HGNC Symbol;Acc:18022]	-0.845837	7.22116	172.415	2.19595e-39	4.6457e-36
ENSG00000114126	TFDP2	transcription factor Dp-2 (E2F dimerization partner 2) [Source:HGNC Symbol;Acc:11751]	-0.826684	7.16089	168.6	1.49638e-38	2.76999e-35
ENSG00000134853	PDGFRA	platelet-derived growth factor receptor, alpha polypeptide [Source:HGNC Symbol;Acc:8803]	-1.2219	5.52119	155.646	1.01159e-35	1.66452e-32
ENSG00000172403	SYNPO2	synaptopodin 2 [Source:HGNC Symbol;Acc:17732]	-1.30325	4.63955	150.761	1.18219e-34	1.75071e-31
ENSG00000050438	SLC4A8	solute carrier family 4, sodium bicarbonate cotransporter, member 8 [Source:HGNC Symbol;Acc:11034]	-1.13802	5.84658	147.651	5.65613e-34	7.61469e-31
ENSG00000213949	ITGA1	integrin, alpha 1 [Source:HGNC Symbol;Acc:6134]	-0.912851	5.90974	142.436	7.80784e-33	9.63552e-30
ENSG00000163346	PBXIP1	pre-B-cell leukemia homeobox interacting protein 1 [Source:HGNC Symbol;Acc:21199]	-1.06961	6.02109	139.443	3.52402e-32	4.01441e-29
ENSG00000180354	C7orf41	chromosome 7 open reading frame 41 [Source:HGNC Symbol;Acc:25457]	-1.11956	5.14443	133.343	7.60576e-31	8.04526e-28
ENSG00000143578	CREB3L4	cAMP responsive element binding protein 3-like 4 [Source:HGNC Symbol;Acc:18854]	-0.88006	6.00889	128.009	1.11719e-29	1.10296e-26
ENSG00000133401	PDZD2	PDZ domain containing 2 [Source:HGNC Symbol;Acc:18486]	-2.32452	2.56946	127.172	1.70347e-29	1.57666e-26
ENSG00000008256	CYTH3	cytohesin 3 [Source:HGNC Symbol;Acc:9504]	0.937463	6.37389	126.101	2.92271e-29	2.54603e-26
ENSG00000162374	ELAVL4	ELAV (embryonic lethal, abnormal vision, Drosophila)-like 4 [Source:HGNC Symbol;Acc:3315]	-0.664947	7.8686	125.771	3.45042e-29	2.83874e-26
ENSG00000138764	CCNG2	cyclin G2 [Source:HGNC Symbol;Acc:1593]	-1.02419	5.56431	125.567	3.82486e-29	2.98118e-26
ENSG00000164684	ZNF704	zinc finger protein 704 [Source:HGNC Symbol;Acc:32291]	-0.785383	6.46888	124.978	5.14745e-29	3.81143e-26
ENSG00000104081	BMF	Bcl2 modifying factor [Source:HGNC Symbol;Acc:24132]	-1.81835	3.15557	124.495	6.56323e-29	4.62832e-26
ENSG00000188452	CERKL	ceramide kinase-like [Source:HGNC Symbol;Acc:21699]	-0.774655	6.61441	121.921	2.40227e-28	1.61705e-25
ENSG00000146278	PNRC1	proline-rich nuclear receptor coactivator 1 [Source:HGNC Symbol;Acc:17278]	-1.11505	4.95489	116.152	4.40209e-27	2.83437e-24
ENSG00000105856	HBP1	HMG-box transcription factor 1 [Source:HGNC Symbol;Acc:23200]	-1.10392	4.90356	112.527	2.73923e-26	1.69022e-23
ENSG00000119801	YPEL5	yippee-like 5 (Drosophila) [Source:HGNC Symbol;Acc:18329]	-1.19844	4.60799	105.592	9.0608e-25	5.36726e-22
ENSG00000124942	AHNAK	AHNAK nucleoprotein [Source:HGNC Symbol;Acc:347]	-0.573064	9.1761	105.49	9.53667e-25	5.43187e-22
ENSG00000151892	GFRA1	GDNF family receptor alpha 1 [Source:HGNC Symbol;Acc:4243]	-0.746733	6.19759	104.411	1.64447e-24	9.01959e-22
ENSG00000139946	PELI2	pellino E3 ubiquitin protein ligase family member 2 [Source:HGNC Symbol;Acc:8828]	-0.746882	6.25904	103.074	3.22796e-24	1.70725e-21
ENSG00000156804	FBXO32	F-box protein 32 [Source:HGNC Symbol;Acc:16731]	-2.47359	1.54708	96.6672	8.20158e-23	4.18818e-20
ENSG00000164099	PRSS12	protease, serine, 12 (neurotrypsin, motopsin) [Source:HGNC Symbol;Acc:9477]	-0.565634	8.61425	89.7785	2.66369e-21	1.27252e-18
ENSG00000107984	DKK1	dickkopf 1 homolog (Xenopus laevis) [Source:HGNC Symbol;Acc:2891]	-1.45998	3.89138	89.7785	2.66379e-21	1.27252e-18
ENSG00000139793	MBNL2	muscleblind-like splicing regulator 2 [Source:HGNC Symbol;Acc:16746]	-1.21725	4.05145	87.9217	6.80967e-21	3.05793e-18
ENSG00000162490	DRAXIN	dorsal inhibitory axon guidance protein [Source:HGNC Symbol;Acc:25054]	-0.726392	5.88	87.9204	6.81422e-21	3.05793e-18
ENSG00000128849	CGNL1	cingulin-like 1 [Source:HGNC Symbol;Acc:25931]	-1.09745	4.07716	85.0298	2.93903e-20	1.28012e-17
ENSG00000178031	ADAMTSL1	ADAMTS-like 1 [Source:HGNC Symbol;Acc:14632]	-2.06811	1.69361	84.2836	4.28647e-20	1.81367e-17
ENSG00000163827	LRRC2	leucine rich repeat containing 2 [Source:HGNC Symbol;Acc:14676]	-1.33473	3.38648	82.3479	1.14122e-19	4.69455e-17
ENSG00000136156	ITM2B	integral membrane protein 2B [Source:HGNC Symbol;Acc:6174]	-0.569052	7.69323	81.4762	1.77382e-19	7.09958e-17
ENSG00000163050	ADCK3	aarF domain containing kinase 3 [Source:HGNC Symbol;Acc:16812]	-0.828988	5.65897	81.2203	2.01908e-19	7.86855e-17
ENSG00000184564	SLITRK6	SLIT and NTRK-like family, member 6 [Source:HGNC Symbol;Acc:23503]	-1.11703	4.18699	79.55	4.70166e-19	1.78531e-16
ENSG00000152409	JMY	junction mediating and regulatory protein, p53 cofactor [Source:HGNC Symbol;Acc:28916]	-0.661974	6.08203	79.334	5.24501e-19	1.94183e-16
ENSG00000139352	ASCL1	achaete-scute complex homolog 1 (Drosophila) [Source:HGNC Symbol;Acc:738]	-0.544719	7.21233	79.0823	5.95755e-19	2.15184e-16
ENSG00000108306	FBXL20	F-box and leucine-rich repeat protein 20 [Source:HGNC Symbol;Acc:24679]	-1.02046	4.21602	77.024	1.68891e-18	5.95502e-16
ENSG00000114742	WDR48	WD repeat domain 48 [Source:HGNC Symbol;Acc:30914]	-0.58764	6.66519	76.4207	2.29238e-18	7.89485e-16
ENSG00000171729	TMEM51	transmembrane protein 51 [Source:HGNC Symbol;Acc:25488]	1.45522	3.37016	75.6699	3.35283e-18	1.12845e-15
ENSG00000211448	DIO2	deiodinase, iodothyronine, type II [Source:HGNC Symbol;Acc:2884]	-2.31548	0.85341	75.6185	3.44118e-18	1.13245e-15
ENSG00000175155	YPEL2	yippee-like 2 (Drosophila) [Source:HGNC Symbol;Acc:18326]	-0.814137	5.19006	75.2634	4.11933e-18	1.32616e-15
ENSG00000111859	NEDD9	neural precursor cell expressed, developmentally down-regulated 9 [Source:HGNC Symbol;Acc:7733]	-0.9525	4.55403	75.1419	4.38069e-18	1.38029e-15
ENSG00000111897	SERINC1	serine incorporator 1 [Source:HGNC Symbol;Acc:13464]	-0.567007	7.70824	74.7884	5.23969e-18	1.59723e-15
ENSG00000049759	NEDD4L	neural precursor cell expressed, developmentally down-regulated 4-like, E3 ubiquitin protein ligase [Source:HGNC Symbol;Acc:7728]	-0.800385	5.27863	74.7714	5.28493e-18	1.59723e-15
ENSG00000165072	MAMDC2	MAM domain containing 2 [Source:HGNC Symbol;Acc:23673]	-1.17813	3.50762	74.5496	5.91334e-18	1.75141e-15
ENSG00000140443	IGF1R	insulin-like growth factor 1 receptor [Source:HGNC Symbol;Acc:5465]	-0.546381	7.10839	71.7607	2.42939e-17	7.05427e-15
ENSG00000175215	CTDSP2	CTD (carboxy-terminal domain, RNA polymerase II, polypeptide A) small phosphatase 2 [Source:HGNC Symbol;Acc:17077]	-0.592311	6.89784	71.3704	2.96081e-17	8.43204e-15
ENSG00000130600	H19	H19, imprinted maternally expressed transcript (non-protein coding) [Source:HGNC Symbol;Acc:4713]	-1.18899	3.26302	68.9671	1.0012e-16	2.7975e-14
ENSG00000124177	CHD6	chromodomain helicase DNA binding protein 6 [Source:HGNC Symbol;Acc:19057]	-0.579275	6.66339	68.3226	1.38819e-16	3.80698e-14
ENSG00000143248	RGS5	regulator of G-protein signaling 5 [Source:HGNC Symbol;Acc:10001]	-1.66563	2.47874	67.8927	1.72637e-16	4.64834e-14
ENSG00000181072	CHRM2	cholinergic receptor, muscarinic 2 [Source:HGNC Symbol;Acc:1951]	-0.744694	5.21509	67.8326	1.77982e-16	4.70668e-14
ENSG00000203880	PCMTD2	protein-L-isoaspartate (D-aspartate) O-methyltransferase domain containing 2 [Source:HGNC Symbol;Acc:15882]	-0.598872	6.62605	67.0349	2.66745e-16	6.93021e-14
ENSG00000134698	EIF2C4	eukaryotic translation initiation factor 2C, 4 [Source:HGNC Symbol;Acc:18424]	-0.728755	5.50512	66.6714	3.20751e-16	8.18966e-14
ENSG00000115896	PLCL1	phospholipase C-like 1 [Source:HGNC Symbol;Acc:9063]	-3.35161	0.184404	66.2249	4.02302e-16	1.00978e-13
ENSG00000163683	C4orf34	chromosome 4 open reading frame 34 [Source:HGNC Symbol;Acc:27321]	-1.23596	2.9689	65.8644	4.83035e-16	1.19221e-13
ENSG00000109971	HSPA8	heat shock 70kDa protein 8 [Source:HGNC Symbol;Acc:5241]	0.458171	11.2853	65.558	5.64297e-16	1.36995e-13
ENSG00000140600	SH3GL3	SH3-domain GRB2-like 3 [Source:HGNC Symbol;Acc:10832]	-0.992577	3.77806	65.402	6.10775e-16	1.45887e-13
ENSG00000165521	EML5	echinoderm microtubule associated protein like 5 [Source:HGNC Symbol;Acc:18197]	-0.525223	6.78501	65.2857	6.47907e-16	1.52299e-13
ENSG00000103546	SLC6A2	solute carrier family 6 (neurotransmitter transporter, noradrenalin), member 2 [Source:HGNC Symbol;Acc:11048]	-0.664992	5.92887	64.7539	8.48621e-16	1.96363e-13
ENSG00000152492	CCDC50	coiled-coil domain containing 50 [Source:HGNC Symbol;Acc:18111]	-0.567733	7.0114	64.6042	9.15612e-16	2.08605e-13
ENSG00000185630	PBX1	pre-B-cell leukemia homeobox 1 [Source:HGNC Symbol;Acc:8632]	-0.554116	6.49441	62.6635	2.4522e-15	5.50221e-13
ENSG00000100784	RPS6KA5	ribosomal protein S6 kinase, 90kDa, polypeptide 5 [Source:HGNC Symbol;Acc:10434]	-1.25106	2.8236	62.565	2.57789e-15	5.69791e-13
ENSG00000163132	MSX1	msh homeobox 1 [Source:HGNC Symbol;Acc:7391]	1.06299	5.61739	61.2721	4.97076e-15	1.08253e-12
ENSG00000143153	ATP1B1	ATPase, Na+/K+ transporting, beta 1 polypeptide [Source:HGNC Symbol;Acc:804]	0.496546	8.08334	61.2056	5.14152e-15	1.10349e-12
ENSG00000115355	CCDC88A	coiled-coil domain containing 88A [Source:HGNC Symbol;Acc:25523]	-0.477641	8.94813	60.8666	6.10756e-15	1.2921e-12
ENSG00000011258	MBTD1	mbt domain containing 1 [Source:HGNC Symbol;Acc:19866]	-0.476693	7.74535	58.8024	1.74329e-14	3.63612e-12
ENSG00000149294	NCAM1	neural cell adhesion molecule 1 [Source:HGNC Symbol;Acc:7656]	-0.510265	6.70281	58.7455	1.79443e-14	3.6908e-12
ENSG00000171246	NPTX1	neuronal pentraxin I [Source:HGNC Symbol;Acc:7952]	-1.12889	3.68864	58.099	2.49249e-14	5.05634e-12
ENSG00000182168	UNC5C	unc-5 homolog C (C. elegans) [Source:HGNC Symbol;Acc:12569]	-0.712166	5.15505	57.7649	2.95399e-14	5.91157e-12
ENSG00000134294	SLC38A2	solute carrier family 38, member 2 [Source:HGNC Symbol;Acc:13448]	-0.44205	8.72212	57.3954	3.56443e-14	7.0381e-12
ENSG00000149131	SERPING1	serpin peptidase inhibitor, clade G (C1 inhibitor), member 1 [Source:HGNC Symbol;Acc:1228]	-0.951247	4.00783	56.7268	5.00766e-14	9.75769e-12
ENSG00000135241	PNPLA8	patatin-like phospholipase domain containing 8 [Source:HGNC Symbol;Acc:28900]	-0.807839	4.68117	56.4344	5.81055e-14	1.11751e-11
ENSG00000141376	BCAS3	breast carcinoma amplified sequence 3 [Source:HGNC Symbol;Acc:14347]	-0.95838	3.69036	55.8272	7.91297e-14	1.50235e-11
ENSG00000171105	INSR	insulin receptor [Source:HGNC Symbol;Acc:6091]	-0.87803	4.06072	55.6347	8.72683e-14	1.63589e-11
ENSG00000047346	FAM214A	family with sequence similarity 214, member A [Source:HGNC Symbol;Acc:25609]	-0.862735	4.59733	54.7695	1.35527e-13	2.50878e-11
ENSG00000181274	FRAT2	frequently rearranged in advanced T-cell lymphomas 2 [Source:HGNC Symbol;Acc:16048]	-1.10422	2.94475	54.6164	1.46504e-13	2.6785e-11
ENSG00000006459	JHDM1D	jumonji C domain containing histone demethylase 1 homolog D (S. cerevisiae) [Source:HGNC Symbol;Acc:22224]	-0.631405	5.73339	54.2422	1.77239e-13	3.20089e-11
ENSG00000196781	TLE1	transducin-like enhancer of split 1 (E(sp1) homolog, Drosophila) [Source:HGNC Symbol;Acc:11837]	0.722089	5.68507	53.7524	2.27421e-13	4.05768e-11
ENSG00000116191	RALGPS2	Ral GEF with PH domain and SH3 binding motif 2 [Source:HGNC Symbol;Acc:30279]	-0.615541	5.74814	53.5348	2.5405e-13	4.47884e-11
ENSG00000066739	ATG2B	autophagy related 2B [Source:HGNC Symbol;Acc:20187]	-0.574862	6.11025	53.165	3.0668e-13	5.32658e-11
ENSG00000168300	PCMTD1	protein-L-isoaspartate (D-aspartate) O-methyltransferase domain containing 1 [Source:HGNC Symbol;Acc:30483]	-0.782468	4.85345	53.1481	3.09329e-13	5.32658e-11
ENSG00000105270	CLIP3	CAP-GLY domain containing linker protein 3 [Source:HGNC Symbol;Acc:24314]	-0.890315	4.2554	52.7148	3.85681e-13	6.56499e-11
ENSG00000165617	DACT1	dapper, antagonist of beta-catenin, homolog 1 (Xenopus laevis) [Source:HGNC Symbol;Acc:17748]	-0.691908	5.18532	52.406	4.51345e-13	7.59542e-11
ENSG00000151414	NEK7	NIMA (never in mitosis gene a)-related kinase 7 [Source:HGNC Symbol;Acc:13386]	-0.535633	7.07074	52.0427	5.43076e-13	9.03642e-11
ENSG00000072422	RHOBTB1	Rho-related BTB domain containing 1 [Source:HGNC Symbol;Acc:18738]	-0.634334	5.48323	51.6159	6.74935e-13	1.11057e-10
ENSG00000244405	ETV5	ets variant 5 [Source:HGNC Symbol;Acc:3494]	-0.840371	4.57306	51.4202	7.45665e-13	1.21347e-10
ENSG00000112406	HECA	headcase homolog (Drosophila) [Source:HGNC Symbol;Acc:21041]	-0.87964	3.99393	51.1504	8.55542e-13	1.37714e-10
ENSG00000171604	CXXC5	CXXC finger protein 5 [Source:HGNC Symbol;Acc:26943]	-0.95707	3.40969	50.9238	9.60207e-13	1.529e-10
ENSG00000102409	BEX4	brain expressed, X-linked 4 [Source:HGNC Symbol;Acc:25475]	-0.564593	6.03099	50.8268	1.00889e-12	1.58112e-10
ENSG00000050405	LIMA1	LIM domain and actin binding 1 [Source:HGNC Symbol;Acc:24636]	0.463566	7.30486	50.8163	1.01429e-12	1.58112e-10
ENSG00000077097	TOP2B	topoisomerase (DNA) II beta 180kDa [Source:HGNC Symbol;Acc:11990]	-0.389747	9.19719	50.6698	1.09291e-12	1.68593e-10
ENSG00000115548	KDM3A	lysine (K)-specific demethylase 3A [Source:HGNC Symbol;Acc:20815]	-0.503624	6.61999	50.3925	1.25873e-12	1.9217e-10
ENSG00000154035	C17orf103	chromosome 17 open reading frame 103 [Source:HGNC Symbol;Acc:30770]	-1.7727	1.48368	50.3516	1.28527e-12	1.9422e-10
ENSG00000163297	ANTXR2	anthrax toxin receptor 2 [Source:HGNC Symbol;Acc:21732]	-0.432409	7.77067	50.151	1.4236e-12	2.1295e-10
ENSG00000164463	CREBRF	CREB3 regulatory factor [Source:HGNC Symbol;Acc:24050]	-1.15718	2.95965	49.5436	1.94016e-12	2.85818e-10
ENSG00000146469	VIP	vasoactive intestinal peptide [Source:HGNC Symbol;Acc:12693]	-2.35514	0.747207	49.5343	1.94933e-12	2.85818e-10
ENSG00000067141	NEO1	neogenin 1 [Source:HGNC Symbol;Acc:7754]	-0.423906	7.54986	49.2926	2.20492e-12	3.20125e-10
ENSG00000162641	AKNAD1	AKNA domain containing 1 [Source:HGNC Symbol;Acc:28398]	-0.438912	7.15403	49.2638	2.23752e-12	3.21703e-10
ENSG00000130707	ASS1	argininosuccinate synthase 1 [Source:HGNC Symbol;Acc:758]	-0.495283	8.42073	48.8871	2.7113e-12	3.86073e-10
ENSG00000166046	TCP11L2	t-complex 11 (mouse)-like 2 [Source:HGNC Symbol;Acc:28627]	-2.58237	0.332321	48.8444	2.77095e-12	3.9081e-10
ENSG00000077279	DCX	doublecortin [Source:HGNC Symbol;Acc:2714]	-0.555936	5.90406	48.1607	3.92684e-12	5.48609e-10
ENSG00000018236	CNTN1	contactin 1 [Source:HGNC Symbol;Acc:2171]	-0.714928	4.8264	47.6933	4.98397e-12	6.89791e-10
ENSG00000119950	MXI1	MAX interactor 1 [Source:HGNC Symbol;Acc:7534]	-0.693598	4.96279	47.6346	5.13541e-12	7.04169e-10
ENSG00000137193	PIM1	pim-1 oncogene [Source:HGNC Symbol;Acc:8986]	-1.37727	2.09526	47.2815	6.14914e-12	8.35431e-10
ENSG00000112290	WASF1	WAS protein family, member 1 [Source:HGNC Symbol;Acc:12732]	-0.396899	8.21118	47.2636	6.20551e-12	8.35431e-10
ENSG00000104722	NEFM	neurofilament, medium polypeptide [Source:HGNC Symbol;Acc:7734]	0.520897	6.4929	47.2107	6.3751e-12	8.5053e-10
ENSG00000166224	SGPL1	sphingosine-1-phosphate lyase 1 [Source:HGNC Symbol;Acc:10817]	-0.459374	6.73136	47.1357	6.62365e-12	8.758e-10
ENSG00000163171	CDC42EP3	CDC42 effector protein (Rho GTPase binding) 3 [Source:HGNC Symbol;Acc:16943]	-0.524798	6.21958	46.9759	7.18666e-12	9.41834e-10
ENSG00000078142	PIK3C3	phosphatidylinositol 3-kinase, catalytic subunit type 3 [Source:HGNC Symbol;Acc:8974]	-0.45263	7.02305	46.8349	7.72249e-12	1.00318e-09
ENSG00000139211	AMIGO2	adhesion molecule with Ig-like domain 2 [Source:HGNC Symbol;Acc:24073]	-1.41021	1.8577	46.7086	8.23681e-12	1.06069e-09
ENSG00000248905	FMN1	formin 1 [Source:HGNC Symbol;Acc:3768]	-0.767606	4.73813	46.54	8.97679e-12	1.14601e-09
ENSG00000164442	CITED2	Cbp/p300-interacting transactivator, with Glu/Asp-rich carboxy-terminal domain, 2 [Source:HGNC Symbol;Acc:1987]	-0.673091	4.87461	45.9663	1.20304e-11	1.52272e-09
ENSG00000185262	FAM100B	family with sequence similarity 100, member B [Source:HGNC Symbol;Acc:28438]	-1.06046	3.06563	45.8299	1.28979e-11	1.61868e-09
ENSG00000164327	RICTOR	RPTOR independent companion of MTOR, complex 2 [Source:HGNC Symbol;Acc:28611]	-0.565889	5.97574	45.6893	1.38578e-11	1.72454e-09
ENSG00000111640	GAPDH	glyceraldehyde-3-phosphate dehydrogenase [Source:HGNC Symbol;Acc:4141]	0.387549	11.4011	45.4114	1.597e-11	1.97083e-09
ENSG00000143390	RFX5	regulatory factor X, 5 (influences HLA class II expression) [Source:HGNC Symbol;Acc:9986]	-0.441426	7.22512	45.3918	1.61309e-11	1.97423e-09
ENSG00000255112	CHMP1B	charged multivesicular body protein 1B [Source:HGNC Symbol;Acc:24287]	-0.53956	5.88981	44.8333	2.14548e-11	2.60429e-09
ENSG00000108406	DHX40	DEAH (Asp-Glu-Ala-His) box polypeptide 40 [Source:HGNC Symbol;Acc:18018]	-0.387102	8.56706	44.4674	2.5863e-11	3.11387e-09
ENSG00000169891	REPS2	RALBP1 associated Eps domain containing 2 [Source:HGNC Symbol;Acc:9963]	-1.45152	1.44596	44.4173	2.65334e-11	3.16881e-09
ENSG00000173714	WFIKKN2	WAP, follistatin/kazal, immunoglobulin, kunitz and netrin domain containing 2 [Source:HGNC Symbol;Acc:30916]	0.517139	6.8815	44.1999	2.96493e-11	3.51261e-09
ENSG00000198873	GRK5	G protein-coupled receptor kinase 5 [Source:HGNC Symbol;Acc:4544]	0.98441	3.96801	43.8764	3.49783e-11	4.11106e-09
ENSG00000017483	SLC38A5	solute carrier family 38, member 5 [Source:HGNC Symbol;Acc:18070]	0.584757	5.54563	43.7553	3.72115e-11	4.3391e-09
ENSG00000162688	AGL	amylo-alpha-1, 6-glucosidase, 4-alpha-glucanotransferase [Source:HGNC Symbol;Acc:321]	-0.457348	6.81893	42.7653	6.17159e-11	7.09262e-09
ENSG00000070495	JMJD6	jumonji domain containing 6 [Source:HGNC Symbol;Acc:19355]	0.592009	6.28095	42.7616	6.18355e-11	7.09262e-09
ENSG00000242125	SNHG3	small nucleolar RNA host gene 3 (non-protein coding) [Source:HGNC Symbol;Acc:10118]	0.404618	7.36908	42.7481	6.22622e-11	7.09262e-09
ENSG00000111653	ING4	inhibitor of growth family, member 4 [Source:HGNC Symbol;Acc:19423]	-0.794077	3.89013	42.5458	6.90466e-11	7.80543e-09
ENSG00000139651	ZNF740	zinc finger protein 740 [Source:HGNC Symbol;Acc:27465]	-0.620083	5.32534	42.507	7.04313e-11	7.89618e-09
ENSG00000110172	CHORDC1	cysteine and histidine-rich domain (CHORD) containing 1 [Source:HGNC Symbol;Acc:14525]	0.585922	7.31525	42.4935	7.09158e-11	7.89618e-09
ENSG00000116990	MYCL1	v-myc myelocytomatosis viral oncogene homolog 1, lung carcinoma derived (avian) [Source:HGNC Symbol;Acc:7555]	-0.957524	3.1357	42.3442	7.65438e-11	8.45923e-09
ENSG00000104419	NDRG1	N-myc downstream regulated 1 [Source:HGNC Symbol;Acc:7679]	-2.01975	1.03498	42.2984	7.8356e-11	8.59537e-09
ENSG00000163638	ADAMTS9	ADAM metallopeptidase with thrombospondin type 1 motif, 9 [Source:HGNC Symbol;Acc:13202]	-0.488109	6.07255	42.1127	8.6161e-11	9.38204e-09
ENSG00000150961	SEC24D	SEC24 family, member D (S. cerevisiae) [Source:HGNC Symbol;Acc:10706]	-0.487557	6.20491	42.0164	9.05091e-11	9.78357e-09
ENSG00000169375	SIN3A	SIN3 transcription regulator homolog A (yeast) [Source:HGNC Symbol;Acc:19353]	-0.480875	6.76612	41.9214	9.50174e-11	1.01965e-08
ENSG00000133639	BTG1	B-cell translocation gene 1, anti-proliferative [Source:HGNC Symbol;Acc:1130]	-0.611435	5.33647	41.9002	9.60547e-11	1.02336e-08
ENSG00000137502	RAB30	RAB30, member RAS oncogene family [Source:HGNC Symbol;Acc:9770]	-0.385916	7.4613	41.8584	9.81271e-11	1.03797e-08
ENSG00000012822	CALCOCO1	calcium binding and coiled-coil domain 1 [Source:HGNC Symbol;Acc:29306]	-0.848507	4.02214	41.6949	1.06688e-10	1.12052e-08
ENSG00000171940	ZNF217	zinc finger protein 217 [Source:HGNC Symbol;Acc:13009]	-0.451421	6.53168	41.664	1.08389e-10	1.13038e-08
ENSG00000165516	KLHDC2	kelch domain containing 2 [Source:HGNC Symbol;Acc:20231]	-0.54476	5.799	41.6103	1.11406e-10	1.15371e-08
ENSG00000130054	FAM155B	family with sequence similarity 155, member B [Source:HGNC Symbol;Acc:30701]	0.848291	4.01064	41.5228	1.16505e-10	1.19814e-08
ENSG00000214944	ARHGEF28	Rho guanine nucleotide exchange factor (GEF) 28 [Source:HGNC Symbol;Acc:30322]	0.667328	4.92393	41.3718	1.2586e-10	1.28542e-08
ENSG00000168542	COL3A1	collagen, type III, alpha 1 [Source:HGNC Symbol;Acc:2201]	-1.1439	2.52176	41.0444	1.48812e-10	1.50943e-08
ENSG00000173230	GOLGB1	golgin B1 [Source:HGNC Symbol;Acc:4429]	-0.39644	7.44066	41.0157	1.5101e-10	1.5213e-08
ENSG00000100604	CHGA	chromogranin A (parathyroid secretory protein 1) [Source:HGNC Symbol;Acc:1929]	-0.55074	6.01074	40.9443	1.56628e-10	1.56723e-08
ENSG00000186591	UBE2H	ubiquitin-conjugating enzyme E2H [Source:HGNC Symbol;Acc:12484]	-0.442962	6.60724	40.8632	1.63267e-10	1.6227e-08
ENSG00000101972	STAG2	stromal antigen 2 [Source:HGNC Symbol;Acc:11355]	-0.388517	7.74251	40.6146	1.85417e-10	1.83056e-08
ENSG00000112144	ICK	intestinal cell (MAK-like) kinase [Source:HGNC Symbol;Acc:21219]	-0.563598	5.67796	40.1921	2.30173e-10	2.25737e-08
ENSG00000183654	MARCH11	membrane-associated ring finger (C3HC4) 11 [Source:HGNC Symbol;Acc:33609]	-0.849284	3.51105	39.8728	2.71049e-10	2.6344e-08
ENSG00000053254	FOXN3	forkhead box N3 [Source:HGNC Symbol;Acc:1928]	-0.371056	7.75388	39.8647	2.72175e-10	2.6344e-08
ENSG00000160097	FNDC5	fibronectin type III domain containing 5 [Source:HGNC Symbol;Acc:20240]	-0.390849	7.26085	39.6187	3.08708e-10	2.94197e-08
ENSG00000141542	RAB40B	RAB40B, member RAS oncogene family [Source:HGNC Symbol;Acc:18284]	-0.877859	3.47743	39.6138	3.09484e-10	2.94197e-08
ENSG00000151725	MLF1IP	MLF1 interacting protein [Source:HGNC Symbol;Acc:21348]	-0.432698	6.9023	39.6111	3.09911e-10	2.94197e-08
ENSG00000115758	ODC1	ornithine decarboxylase 1 [Source:HGNC Symbol;Acc:8109]	0.323844	9.23104	39.5381	3.21725e-10	3.03466e-08
ENSG00000144366	GULP1	GULP, engulfment adaptor PTB domain containing 1 [Source:HGNC Symbol;Acc:18649]	-0.470658	6.5757	39.4741	3.32437e-10	3.11586e-08
ENSG00000008083	JARID2	jumonji, AT rich interactive domain 2 [Source:HGNC Symbol;Acc:6196]	-0.45487	6.30241	39.0094	4.21764e-10	3.92824e-08
ENSG00000143061	IGSF3	immunoglobulin superfamily, member 3 [Source:HGNC Symbol;Acc:5950]	-0.368507	7.85254	38.9577	4.33081e-10	4.00843e-08
ENSG00000123636	BAZ2B	bromodomain adjacent to zinc finger domain, 2B [Source:HGNC Symbol;Acc:963]	-0.488118	5.93438	38.8016	4.69154e-10	4.31534e-08
ENSG00000118946	PCDH17	protocadherin 17 [Source:HGNC Symbol;Acc:14267]	-1.36825	2.01521	38.2048	6.36947e-10	5.82256e-08
ENSG00000197467	COL13A1	collagen, type XIII, alpha 1 [Source:HGNC Symbol;Acc:2190]	-1.42723	1.2157	38.1526	6.54235e-10	5.94391e-08
ENSG00000054793	ATP9A	ATPase, class II, type 9A [Source:HGNC Symbol;Acc:13540]	-0.555535	5.55413	37.666	8.3957e-10	7.58121e-08
ENSG00000106799	TGFBR1	transforming growth factor, beta receptor 1 [Source:HGNC Symbol;Acc:11772]	-0.389962	7.24552	37.5869	8.74285e-10	7.84684e-08
ENSG00000108106	UBE2S	ubiquitin-conjugating enzyme E2S [Source:HGNC Symbol;Acc:17895]	0.547308	6.70585	37.4435	9.40987e-10	8.39463e-08
ENSG00000197183	C20orf112	chromosome 20 open reading frame 112 [Source:HGNC Symbol;Acc:16106]	-0.865502	3.51252	37.23	1.04988e-09	9.30998e-08
ENSG00000111885	MAN1A1	mannosidase, alpha, class 1A, member 1 [Source:HGNC Symbol;Acc:6821]	-0.42455	6.87406	37.1312	1.10442e-09	9.73531e-08
ENSG00000120693	SMAD9	SMAD family member 9 [Source:HGNC Symbol;Acc:6774]	-0.386192	6.83476	36.8324	1.28735e-09	1.12807e-07
ENSG00000120727	PAIP2	poly(A) binding protein interacting protein 2 [Source:HGNC Symbol;Acc:17970]	-0.436614	6.62905	36.7502	1.34277e-09	1.16971e-07
ENSG00000204388	HSPA1B	heat shock 70kDa protein 1B [Source:HGNC Symbol;Acc:5233]	1.10137	5.38943	36.599	1.45103e-09	1.25662e-07
ENSG00000184347	SLIT3	slit homolog 3 (Drosophila) [Source:HGNC Symbol;Acc:11087]	-0.452176	6.62019	36.3942	1.61185e-09	1.38779e-07
ENSG00000189343	RPS2P46	ribosomal protein S2 pseudogene 46 [Source:HGNC Symbol;Acc:35839]	0.663851	4.98887	36.3575	1.64247e-09	1.40597e-07
ENSG00000149925	ALDOA	aldolase A, fructose-bisphosphate [Source:HGNC Symbol;Acc:414]	0.469848	8.4812	36.3139	1.67963e-09	1.42952e-07
ENSG00000111145	ELK3	ELK3, ETS-domain protein (SRF accessory protein 2) [Source:HGNC Symbol;Acc:3325]	-0.589454	5.32352	36.1027	1.87189e-09	1.57843e-07
ENSG00000005810	MYCBP2	MYC binding protein 2, E3 ubiquitin protein ligase [Source:HGNC Symbol;Acc:23386]	-0.326408	8.41431	36.0985	1.87591e-09	1.57843e-07
ENSG00000079102	RUNX1T1	runt-related transcription factor 1; translocated to, 1 (cyclin D-related) [Source:HGNC Symbol;Acc:1535]	-0.538133	6.39365	35.8769	2.10189e-09	1.75858e-07
ENSG00000171988	JMJD1C	jumonji domain containing 1C [Source:HGNC Symbol;Acc:12313]	-0.422787	6.93707	35.7004	2.30111e-09	1.91445e-07
ENSG00000138439	FAM117B	family with sequence similarity 117, member B [Source:HGNC Symbol;Acc:14440]	-0.55183	5.48982	35.6026	2.41958e-09	2.00177e-07
ENSG00000120694	HSPH1	heat shock 105kDa/110kDa protein 1 [Source:HGNC Symbol;Acc:16969]	0.44874	9.28616	35.5695	2.46105e-09	2.02476e-07
ENSG00000100219	XBP1	X-box binding protein 1 [Source:HGNC Symbol;Acc:12801]	0.543816	6.19754	35.5167	2.5287e-09	2.06893e-07
ENSG00000104635	SLC39A14	solute carrier family 39 (zinc transporter), member 14 [Source:HGNC Symbol;Acc:20858]	0.368402	7.48148	35.4734	2.58561e-09	2.10386e-07
ENSG00000140280	LYSMD2	LysM, putative peptidoglycan-binding, domain containing 2 [Source:HGNC Symbol;Acc:28571]	0.825793	4.36004	35.448	2.61948e-09	2.11977e-07
ENSG00000164985	PSIP1	PC4 and SFRS1 interacting protein 1 [Source:HGNC Symbol;Acc:9527]	-0.366629	8.05716	35.4209	2.65623e-09	2.13783e-07
ENSG00000243244	STON1	stonin 1 [Source:HGNC Symbol;Acc:17003]	-0.938192	3.03008	35.3364	2.77395e-09	2.22051e-07
ENSG00000166783	KIAA0430	KIAA0430 [Source:HGNC Symbol;Acc:29562]	-0.420182	6.42505	35.3026	2.82259e-09	2.2473e-07
ENSG00000117139	KDM5B	lysine (K)-specific demethylase 5B [Source:HGNC Symbol;Acc:18039]	-0.34346	8.29771	35.2873	2.84475e-09	2.25283e-07
ENSG00000225783	MIAT	myocardial infarction associated transcript (non-protein coding) [Source:HGNC Symbol;Acc:33425]	-0.444177	6.87719	35.2556	2.89144e-09	2.27762e-07
ENSG00000205213	LGR4	leucine-rich repeat containing G protein-coupled receptor 4 [Source:HGNC Symbol;Acc:13299]	-0.673526	4.27975	34.8763	3.51323e-09	2.75278e-07
ENSG00000163960	UBXN7	UBX domain protein 7 [Source:HGNC Symbol;Acc:29119]	-0.355632	7.61943	34.816	3.62381e-09	2.82447e-07
ENSG00000104529	EEF1D	eukaryotic translation elongation factor 1 delta (guanine nucleotide exchange protein) [Source:HGNC Symbol;Acc:3211]	0.532628	7.06733	34.542	4.17149e-09	3.23433e-07
ENSG00000156925	ZIC3	Zic family member 3 [Source:HGNC Symbol;Acc:12874]	-0.381069	6.82472	34.5099	4.24099e-09	3.27108e-07
ENSG00000151150	ANK3	ankyrin 3, node of Ranvier (ankyrin G) [Source:HGNC Symbol;Acc:494]	-0.579312	5.17235	34.4163	4.44976e-09	3.41433e-07
ENSG00000095637	SORBS1	sorbin and SH3 domain containing 1 [Source:HGNC Symbol;Acc:14565]	-0.963593	2.56405	34.3947	4.49939e-09	3.43461e-07
ENSG00000059728	MXD1	MAX dimerization protein 1 [Source:HGNC Symbol;Acc:6761]	-0.792625	3.51784	34.2241	4.91161e-09	3.73005e-07
ENSG00000140988	RPS2	ribosomal protein S2 [Source:HGNC Symbol;Acc:10404]	0.378377	9.71083	33.9972	5.51906e-09	4.16999e-07
ENSG00000155660	PDIA4	protein disulfide isomerase family A, member 4 [Source:HGNC Symbol;Acc:30167]	0.410406	7.09729	33.9695	5.59825e-09	4.20835e-07
ENSG00000141576	RNF157	ring finger protein 157 [Source:HGNC Symbol;Acc:29402]	-0.407626	6.67498	33.9483	5.65963e-09	4.233e-07
ENSG00000178038	ALS2CL	ALS2 C-terminal like [Source:HGNC Symbol;Acc:20605]	-1.63026	1.47116	33.9281	5.71866e-09	4.25566e-07
ENSG00000189079	ARID2	AT rich interactive domain 2 (ARID, RFX-like) [Source:HGNC Symbol;Acc:18037]	-0.40075	6.73026	33.7817	6.16546e-09	4.56521e-07
ENSG00000114446	IFT57	intraflagellar transport 57 homolog (Chlamydomonas) [Source:HGNC Symbol;Acc:17367]	0.493883	5.96745	33.6754	6.51175e-09	4.79764e-07
ENSG00000076604	TRAF4	TNF receptor-associated factor 4 [Source:HGNC Symbol;Acc:12034]	0.470841	6.40281	33.5568	6.92141e-09	5.07422e-07
ENSG00000169213	RAB3B	RAB3B, member RAS oncogene family [Source:HGNC Symbol;Acc:9778]	-0.600695	4.79865	33.5134	7.07735e-09	5.16298e-07
ENSG00000103540	CCP110	centriolar coiled coil protein 110kDa [Source:HGNC Symbol;Acc:24342]	0.364623	7.94749	33.4853	7.18044e-09	5.21251e-07
ENSG00000175643	RMI2	RMI2, RecQ mediated genome instability 2, homolog (S. cerevisiae) [Source:HGNC Symbol;Acc:28349]	-0.634747	4.35342	33.4142	7.44786e-09	5.38026e-07
ENSG00000159167	STC1	stanniocalcin 1 [Source:HGNC Symbol;Acc:11373]	-0.631417	4.42238	33.3985	7.50801e-09	5.39739e-07
ENSG00000144868	TMEM108	transmembrane protein 108 [Source:HGNC Symbol;Acc:28451]	-0.784887	3.63799	33.3712	7.61437e-09	5.4474e-07
ENSG00000023287	RB1CC1	RB1-inducible coiled-coil 1 [Source:HGNC Symbol;Acc:15574]	-0.431599	6.7612	33.2953	7.91733e-09	5.63691e-07
ENSG00000131373	HACL1	2-hydroxyacyl-CoA lyase 1 [Source:HGNC Symbol;Acc:17856]	-0.761097	3.64821	32.9983	9.2239e-09	6.53573e-07
ENSG00000174738	NR1D2	nuclear receptor subfamily 1, group D, member 2 [Source:HGNC Symbol;Acc:7963]	-0.506609	5.71067	32.9745	9.33751e-09	6.58473e-07
ENSG00000164609	SLU7	SLU7 splicing factor homolog (S. cerevisiae) [Source:HGNC Symbol;Acc:16939]	-0.423346	6.2656	32.8534	9.93788e-09	6.97489e-07
ENSG00000197958	RPL12	ribosomal protein L12 [Source:HGNC Symbol;Acc:10302]	0.328036	9.09712	32.699	1.07592e-08	7.51569e-07
ENSG00000132002	DNAJB1	DnaJ (Hsp40) homolog, subfamily B, member 1 [Source:HGNC Symbol;Acc:5270]	0.683918	6.83094	32.3966	1.25708e-08	8.73996e-07
ENSG00000111961	SASH1	SAM and SH3 domain containing 1 [Source:HGNC Symbol;Acc:19182]	-0.443909	5.97471	32.3198	1.30771e-08	9.0495e-07
ENSG00000089157	RPLP0	ribosomal protein, large, P0 [Source:HGNC Symbol;Acc:10371]	0.300251	10.5901	32.2761	1.33748e-08	9.21242e-07
ENSG00000153561	RMND5A	required for meiotic nuclear division 5 homolog A (S. cerevisiae) [Source:HGNC Symbol;Acc:25850]	-0.374627	6.84671	32.2352	1.36592e-08	9.36476e-07
ENSG00000117395	EBNA1BP2	EBNA1 binding protein 2 [Source:HGNC Symbol;Acc:15531]	0.395989	6.71852	32.1754	1.4086e-08	9.61287e-07
ENSG00000247626	MARS2	methionyl-tRNA synthetase 2, mitochondrial [Source:HGNC Symbol;Acc:25133]	0.585346	5.05177	32.1408	1.43391e-08	9.74071e-07
ENSG00000152620	NADKD1	NAD kinase domain containing 1 [Source:HGNC Symbol;Acc:26404]	-0.619898	4.46926	32.1211	1.44855e-08	9.79524e-07
ENSG00000155130	MARCKS	myristoylated alanine-rich protein kinase C substrate [Source:HGNC Symbol;Acc:6759]	-0.334598	8.61257	31.9491	1.58264e-08	1.06534e-06
ENSG00000226950	DANCR	differentiation antagonizing non-protein coding RNA [Source:HGNC Symbol;Acc:28964]	0.382507	7.21746	31.6976	1.80142e-08	1.20711e-06
ENSG00000103257	SLC7A5	solute carrier family 7 (amino acid transporter light chain, L system), member 5 [Source:HGNC Symbol;Acc:11063]	0.627044	6.10065	31.6867	1.81156e-08	1.20844e-06
ENSG00000162981	FAM84A	family with sequence similarity 84, member A [Source:HGNC Symbol;Acc:20743]	-0.292036	9.65255	31.6557	1.84077e-08	1.22242e-06
ENSG00000162923	WDR26	WD repeat domain 26 [Source:HGNC Symbol;Acc:21208]	-0.332039	7.91034	31.5514	1.94231e-08	1.28409e-06
ENSG00000147862	NFIB	nuclear factor I/B [Source:HGNC Symbol;Acc:7785]	-0.343573	7.56117	31.3253	2.18222e-08	1.43629e-06
ENSG00000152217	SETBP1	SET binding protein 1 [Source:HGNC Symbol;Acc:15573]	-0.419516	6.13626	31.1619	2.37384e-08	1.5555e-06
ENSG00000134369	NAV1	neuron navigator 1 [Source:HGNC Symbol;Acc:15989]	-0.488313	5.73201	31.0835	2.47168e-08	1.61247e-06
ENSG00000198408	MGEA5	meningioma expressed antigen 5 (hyaluronidase) [Source:HGNC Symbol;Acc:7056]	-0.332748	8.18626	30.97	2.62045e-08	1.70203e-06
ENSG00000100418	DESI1	desumoylating isopeptidase 1 [Source:HGNC Symbol;Acc:24577]	0.453343	5.97976	30.9312	2.67345e-08	1.72887e-06
ENSG00000197702	PARVA	parvin, alpha [Source:HGNC Symbol;Acc:14652]	-0.591207	4.45972	30.8938	2.7254e-08	1.7548e-06
ENSG00000116044	NFE2L2	nuclear factor (erythroid-derived 2)-like 2 [Source:HGNC Symbol;Acc:7782]	-0.358227	7.30012	30.7767	2.89493e-08	1.85589e-06
ENSG00000170271	C5orf4	chromosome 5 open reading frame 4 [Source:HGNC Symbol;Acc:1334]	-1.5544	1.45308	30.6117	3.1519e-08	2.01192e-06
ENSG00000137968	SLC44A5	solute carrier family 44, member 5 [Source:HGNC Symbol;Acc:28524]	-0.535083	5.3991	30.3922	3.52949e-08	2.24327e-06
ENSG00000146938	NLGN4X	neuroligin 4, X-linked [Source:HGNC Symbol;Acc:14287]	-0.477687	5.44594	30.3051	3.69163e-08	2.32935e-06
ENSG00000175224	ATG13	autophagy related 13 [Source:HGNC Symbol;Acc:29091]	-0.500251	5.42833	30.3026	3.69638e-08	2.32935e-06
ENSG00000196950	SLC39A10	solute carrier family 39 (zinc transporter), member 10 [Source:HGNC Symbol;Acc:20861]	-0.362954	7.20376	30.2734	3.75235e-08	2.3546e-06
ENSG00000114439	BBX	bobby sox homolog (Drosophila) [Source:HGNC Symbol;Acc:14422]	-0.397411	6.21399	30.1774	3.94269e-08	2.4636e-06
ENSG00000101220	C20orf27	chromosome 20 open reading frame 27 [Source:HGNC Symbol;Acc:15873]	0.59317	4.87288	30.035	4.24325e-08	2.64026e-06
ENSG00000173821	RNF213	ring finger protein 213 [Source:HGNC Symbol;Acc:14539]	-0.413386	6.5183	30.0029	4.31411e-08	2.67312e-06
ENSG00000166946	CCNDBP1	cyclin D-type binding-protein 1 [Source:HGNC Symbol;Acc:1587]	-0.507614	5.45943	29.9453	4.44415e-08	2.74223e-06
ENSG00000165659	DACH1	dachshund homolog 1 (Drosophila) [Source:HGNC Symbol;Acc:2663]	-0.435981	5.78846	29.8931	4.56542e-08	2.80536e-06
ENSG00000111641	NOP2	NOP2 nucleolar protein homolog (yeast) [Source:HGNC Symbol;Acc:7867]	0.386436	6.7996	29.8747	4.60896e-08	2.82042e-06
ENSG00000164330	EBF1	early B-cell factor 1 [Source:HGNC Symbol;Acc:3126]	-0.654828	4.15862	29.8629	4.63691e-08	2.82584e-06
ENSG00000131018	SYNE1	spectrin repeat containing, nuclear envelope 1 [Source:HGNC Symbol;Acc:17089]	-0.499132	5.33727	29.8073	4.7718e-08	2.89613e-06
ENSG00000104332	SFRP1	secreted frizzled-related protein 1 [Source:HGNC Symbol;Acc:10776]	-0.40417	6.11	29.7196	4.99267e-08	3.01781e-06
ENSG00000109618	SEPSECS	Sep (O-phosphoserine) tRNA:Sec (selenocysteine) tRNA synthase [Source:HGNC Symbol;Acc:30605]	-0.554413	4.6967	29.6006	5.30882e-08	3.19587e-06
ENSG00000198961	PJA2	praja ring finger 2, E3 ubiquitin protein ligase [Source:HGNC Symbol;Acc:17481]	-0.33992	7.31153	29.5764	5.37567e-08	3.22301e-06
ENSG00000177600	RPLP2	ribosomal protein, large, P2 [Source:HGNC Symbol;Acc:10377]	0.394604	8.00685	29.5366	5.48703e-08	3.27651e-06
ENSG00000139629	GALNT6	UDP-N-acetyl-alpha-D-galactosamine:polypeptide N-acetylgalactosaminyltransferase 6 (GalNAc-T6) [Source:HGNC Symbol;Acc:4128]	-0.682036	3.61799	29.5	5.59167e-08	3.32559e-06
ENSG00000117569	PTBP2	polypyrimidine tract binding protein 2 [Source:HGNC Symbol;Acc:17662]	-0.427835	7.01289	29.4865	5.63062e-08	3.33535e-06
ENSG00000002834	LASP1	LIM and SH3 protein 1 [Source:HGNC Symbol;Acc:6513]	-0.539118	5.19376	29.4467	5.74761e-08	3.39109e-06
ENSG00000123416	TUBA1B	tubulin, alpha 1b [Source:HGNC Symbol;Acc:18809]	0.363556	8.02213	29.4205	5.82575e-08	3.42356e-06
ENSG00000073614	KDM5A	lysine (K)-specific demethylase 5A [Source:HGNC Symbol;Acc:9886]	-0.346541	7.01407	29.3628	6.00198e-08	3.50898e-06
ENSG00000170419	VSTM2A	V-set and transmembrane domain containing 2A [Source:HGNC Symbol;Acc:28499]	-0.466239	5.68188	29.3574	6.01851e-08	3.50898e-06
ENSG00000186918	ZNF395	zinc finger protein 395 [Source:HGNC Symbol;Acc:18737]	-0.553632	4.55724	29.2022	6.52064e-08	3.78683e-06
ENSG00000109458	GAB1	GRB2-associated binding protein 1 [Source:HGNC Symbol;Acc:4066]	-0.462903	5.50549	29.1666	6.64153e-08	3.83016e-06
ENSG00000117543	DPH5	DPH5 homolog (S. cerevisiae) [Source:HGNC Symbol;Acc:24270]	0.420812	6.06909	29.1585	6.66918e-08	3.83016e-06
ENSG00000196482	ESRRG	estrogen-related receptor gamma [Source:HGNC Symbol;Acc:3474]	-0.400685	6.10644	29.1575	6.67284e-08	3.83016e-06
ENSG00000261613	RP11-20I23.8		0.393708	7.34216	29.1084	6.84381e-08	3.91313e-06
ENSG00000154310	TNIK	TRAF2 and NCK interacting kinase [Source:HGNC Symbol;Acc:30765]	-0.523644	4.87553	29.0227	7.15362e-08	4.07454e-06
ENSG00000006007	GDE1	glycerophosphodiester phosphodiesterase 1 [Source:HGNC Symbol;Acc:29644]	0.397455	6.28573	28.9668	7.36312e-08	4.17779e-06
ENSG00000083290	ULK2	unc-51-like kinase 2 (C. elegans) [Source:HGNC Symbol;Acc:13480]	-0.495676	5.25237	28.6748	8.56107e-08	4.83897e-06
ENSG00000080644	CHRNA3	cholinergic receptor, nicotinic, alpha 3 (neuronal) [Source:HGNC Symbol;Acc:1957]	-0.374224	7.53081	28.6229	8.79346e-08	4.95142e-06
ENSG00000188176	SMTNL2	smoothelin-like 2 [Source:HGNC Symbol;Acc:24764]	-1.3526	0.918578	28.5411	9.17295e-08	5.13203e-06
ENSG00000067369	TP53BP1	tumor protein p53 binding protein 1 [Source:HGNC Symbol;Acc:11999]	-0.309325	8.18864	28.5389	9.18352e-08	5.13203e-06
ENSG00000048649	RSF1	remodeling and spacing factor 1 [Source:HGNC Symbol;Acc:18118]	-0.323277	7.61344	28.4182	9.77423e-08	5.4416e-06
ENSG00000132872	SYT4	synaptotagmin IV [Source:HGNC Symbol;Acc:11512]	-0.607434	4.85504	28.3861	9.93765e-08	5.51186e-06
ENSG00000170873	MTSS1	metastasis suppressor 1 [Source:HGNC Symbol;Acc:20443]	-0.538059	4.77525	28.2986	1.03973e-07	5.7453e-06
ENSG00000010278	CD9	CD9 molecule [Source:HGNC Symbol;Acc:1709]	-0.901161	2.26818	28.2219	1.08173e-07	5.93486e-06
ENSG00000069188	SDK2	sidekick cell adhesion molecule 2 [Source:HGNC Symbol;Acc:19308]	-1.66453	0.606072	28.2213	1.08205e-07	5.93486e-06
ENSG00000144485	HES6	hairy and enhancer of split 6 (Drosophila) [Source:HGNC Symbol;Acc:18254]	0.520098	5.94586	28.1316	1.13338e-07	6.17334e-06
ENSG00000124570	SERPINB6	serpin peptidase inhibitor, clade B (ovalbumin), member 6 [Source:HGNC Symbol;Acc:8950]	-1.07916	2.13318	28.1308	1.13387e-07	6.17334e-06
ENSG00000041515	MYO16	myosin XVI [Source:HGNC Symbol;Acc:29822]	-1.09572	1.65768	28.1222	1.1389e-07	6.17803e-06
ENSG00000136603	SKIL	SKI-like oncogene [Source:HGNC Symbol;Acc:10897]	-0.382417	6.61347	28.0502	1.18207e-07	6.38877e-06
ENSG00000154930	ACSS1	acyl-CoA synthetase short-chain family member 1 [Source:HGNC Symbol;Acc:16091]	-0.972317	2.3938	27.9331	1.25586e-07	6.76291e-06
ENSG00000165895	ARHGAP42	Rho GTPase activating protein 42 [Source:HGNC Symbol;Acc:26545]	-0.412617	6.20726	27.9025	1.27585e-07	6.84569e-06
ENSG00000137818	RPLP1	ribosomal protein, large, P1 [Source:HGNC Symbol;Acc:10372]	0.358204	9.26497	27.8693	1.29793e-07	6.93898e-06
ENSG00000130449	ZSWIM6	zinc finger, SWIM-type containing 6 [Source:HGNC Symbol;Acc:29316]	-0.433927	6.16168	27.8488	1.31179e-07	6.96873e-06
ENSG00000178035	IMPDH2	IMP (inosine 5'-monophosphate) dehydrogenase 2 [Source:HGNC Symbol;Acc:6053]	0.315584	7.74322	27.8471	1.3129e-07	6.96873e-06
ENSG00000174145	KIAA1239	KIAA1239 [Source:HGNC Symbol;Acc:29229]	-0.577498	4.58017	27.8316	1.32346e-07	6.99969e-06
ENSG00000162998	FRZB	frizzled-related protein [Source:HGNC Symbol;Acc:3959]	-0.555857	4.72749	27.818	1.33278e-07	7.00963e-06
ENSG00000227051	C14orf132	chromosome 14 open reading frame 132 [Source:HGNC Symbol;Acc:20346]	-0.301622	8.53753	27.8151	1.33481e-07	7.00963e-06
ENSG00000126016	AMOT	angiomotin [Source:HGNC Symbol;Acc:17810]	-0.559574	4.53242	27.7989	1.34603e-07	7.04361e-06
ENSG00000233016	SNHG7	small nucleolar RNA host gene 7 (non-protein coding) [Source:HGNC Symbol;Acc:28254]	0.504375	5.36028	27.7631	1.37115e-07	7.14978e-06
ENSG00000185950	IRS2	insulin receptor substrate 2 [Source:HGNC Symbol;Acc:6126]	-0.94821	2.57855	27.7219	1.40066e-07	7.27802e-06
ENSG00000146701	MDH2	malate dehydrogenase 2, NAD (mitochondrial) [Source:HGNC Symbol;Acc:6971]	0.35758	7.59749	27.6934	1.42147e-07	7.36032e-06
ENSG00000159399	HK2	hexokinase 2 [Source:HGNC Symbol;Acc:4923]	0.308013	7.7396	27.6415	1.46012e-07	7.53412e-06
ENSG00000079215	SLC1A3	solute carrier family 1 (glial high affinity glutamate transporter), member 3 [Source:HGNC Symbol;Acc:10941]	0.710419	3.9063	27.6139	1.48109e-07	7.59136e-06
ENSG00000111249	CUX2	cut-like homeobox 2 [Source:HGNC Symbol;Acc:19347]	-0.907864	2.24726	27.6089	1.4849e-07	7.59136e-06
ENSG00000185201	IFITM2	interferon induced transmembrane protein 2 [Source:HGNC Symbol;Acc:5413]	-1.5716	0.59193	27.6067	1.48659e-07	7.59136e-06
ENSG00000155367	PPM1J	protein phosphatase, Mg2+/Mn2+ dependent, 1J [Source:HGNC Symbol;Acc:20785]	-1.30272	1.12728	27.4953	1.57474e-07	8.01386e-06
ENSG00000144381	HSPD1	heat shock 60kDa protein 1 (chaperonin) [Source:HGNC Symbol;Acc:5261]	0.278451	10.331	27.4797	1.58751e-07	8.0288e-06
ENSG00000106052	TAX1BP1	Tax1 (human T-cell leukemia virus type I) binding protein 1 [Source:HGNC Symbol;Acc:11575]	-0.345656	7.02203	27.4785	1.58852e-07	8.0288e-06
ENSG00000111341	MGP	matrix Gla protein [Source:HGNC Symbol;Acc:7060]	-1.19181	1.33993	27.4649	1.59971e-07	8.05787e-06
ENSG00000168646	AXIN2	axin 2 [Source:HGNC Symbol;Acc:904]	0.499674	5.9341	27.3119	1.73143e-07	8.69178e-06
ENSG00000095015	MAP3K1	mitogen-activated protein kinase kinase kinase 1, E3 ubiquitin protein ligase [Source:HGNC Symbol;Acc:6848]	-0.427649	5.73817	27.2691	1.7702e-07	8.85636e-06
ENSG00000087116	ADAMTS2	ADAM metallopeptidase with thrombospondin type 1 motif, 2 [Source:HGNC Symbol;Acc:218]	-0.814821	2.79069	27.248	1.78956e-07	8.92311e-06
ENSG00000106341	PPP1R17	protein phosphatase 1, regulatory subunit 17 [Source:HGNC Symbol;Acc:16973]	-2.2078	-0.620358	27.2183	1.81727e-07	9.03084e-06
ENSG00000072041	SLC6A15	solute carrier family 6 (neutral amino acid transporter), member 15 [Source:HGNC Symbol;Acc:13621]	-0.373563	7.81869	27.1712	1.86212e-07	9.2228e-06
ENSG00000185070	FLRT2	fibronectin leucine rich transmembrane protein 2 [Source:HGNC Symbol;Acc:3761]	0.541064	5.02023	27.0902	1.94176e-07	9.58516e-06
ENSG00000061337	LZTS1	leucine zipper, putative tumor suppressor 1 [Source:HGNC Symbol;Acc:13861]	0.538721	5.12854	27.0639	1.96836e-07	9.68421e-06
ENSG00000104320	NBN	nibrin [Source:HGNC Symbol;Acc:7652]	-0.379645	7.31465	27.0412	1.99164e-07	9.76627e-06
ENSG00000100027	YPEL1	yippee-like 1 (Drosophila) [Source:HGNC Symbol;Acc:12845]	-0.671804	3.59724	27.0089	2.02516e-07	9.88853e-06
ENSG00000100650	SRSF5	serine/arginine-rich splicing factor 5 [Source:HGNC Symbol;Acc:10787]	-0.325339	8.19806	27.0044	2.02992e-07	9.88853e-06
ENSG00000117525	F3	coagulation factor III (thromboplastin, tissue factor) [Source:HGNC Symbol;Acc:3541]	-0.612738	4.61959	26.9957	2.03906e-07	9.90047e-06
ENSG00000035862	TIMP2	TIMP metallopeptidase inhibitor 2 [Source:HGNC Symbol;Acc:11821]	-0.295632	8.38711	26.9304	2.10917e-07	1.02074e-05
ENSG00000169738	DCXR	dicarbonyl/L-xylulose reductase [Source:HGNC Symbol;Acc:18985]	0.473384	5.59113	26.9223	2.11803e-07	1.02169e-05
ENSG00000124762	CDKN1A	cyclin-dependent kinase inhibitor 1A (p21, Cip1) [Source:HGNC Symbol;Acc:1784]	0.375881	8.07905	26.89	2.15369e-07	1.03552e-05
ENSG00000165879	FRAT1	frequently rearranged in advanced T-cell lymphomas [Source:HGNC Symbol;Acc:3944]	-1.7494	0.00125185	26.8142	2.23984e-07	1.07345e-05
ENSG00000024862	CCDC28A	coiled-coil domain containing 28A [Source:HGNC Symbol;Acc:21098]	-0.668722	3.59915	26.7455	2.32097e-07	1.10875e-05
ENSG00000182199	SHMT2	serine hydroxymethyltransferase 2 (mitochondrial) [Source:HGNC Symbol;Acc:10852]	0.416109	7.16893	26.725	2.34572e-07	1.11697e-05
ENSG00000168916	ZNF608	zinc finger protein 608 [Source:HGNC Symbol;Acc:29238]	-0.506374	5.50401	26.5826	2.52512e-07	1.19854e-05
ENSG00000119820	YIPF4	Yip1 domain family, member 4 [Source:HGNC Symbol;Acc:28145]	-0.4073	6.19459	26.5495	2.56872e-07	1.21534e-05
ENSG00000106415	GLCCI1	glucocorticoid induced transcript 1 [Source:HGNC Symbol;Acc:18713]	-0.430475	5.83109	26.4842	2.65702e-07	1.25311e-05
ENSG00000080608	KIAA0020	KIAA0020 [Source:HGNC Symbol;Acc:29676]	0.333254	6.9071	26.4504	2.70395e-07	1.2712e-05
ENSG00000053108	FSTL4	follistatin-like 4 [Source:HGNC Symbol;Acc:21389]	-1.00763	2.54044	26.3971	2.7796e-07	1.30263e-05
ENSG00000121851	POLR3GL	polymerase (RNA) III (DNA directed) polypeptide G (32kD)-like [Source:HGNC Symbol;Acc:28466]	-0.522443	4.70514	26.3478	2.85139e-07	1.33206e-05
ENSG00000185112	FAM43A	family with sequence similarity 43, member A [Source:HGNC Symbol;Acc:26888]	-0.514225	5.19719	26.3373	2.86701e-07	1.33514e-05
ENSG00000169710	FASN	fatty acid synthase [Source:HGNC Symbol;Acc:3594]	0.488015	8.8826	26.3276	2.88148e-07	1.33768e-05
ENSG00000154319	FAM167A	family with sequence similarity 167, member A [Source:HGNC Symbol;Acc:15549]	-1.18483	1.7636	26.2466	3.00488e-07	1.3906e-05
ENSG00000133134	BEX2	brain expressed X-linked 2 [Source:HGNC Symbol;Acc:30933]	-0.631351	4.12844	26.2368	3.02009e-07	1.39329e-05
ENSG00000085832	EPS15	epidermal growth factor receptor pathway substrate 15 [Source:HGNC Symbol;Acc:3419]	-0.368017	6.67804	26.1698	3.1268e-07	1.43804e-05
ENSG00000224078	SNHG14	small nucleolar RNA host gene 14 (non-protein coding) [Source:HGNC Symbol;Acc:37462]	-0.302485	7.72686	26.1507	3.15781e-07	1.4478e-05
ENSG00000179008	C14orf39	chromosome 14 open reading frame 39 [Source:HGNC Symbol;Acc:19849]	-0.884491	2.75802	26.1186	3.2108e-07	1.46755e-05
ENSG00000237976	RP11-126K1.6		-0.78182	2.80088	26.0265	3.36771e-07	1.53454e-05
ENSG00000184678	HIST2H2BE	histone cluster 2, H2be [Source:HGNC Symbol;Acc:4760]	0.624149	4.63499	26.017	3.38427e-07	1.53735e-05
ENSG00000164818	HEATR2	HEAT repeat containing 2 [Source:HGNC Symbol;Acc:26013]	0.426979	5.84484	25.9785	3.45246e-07	1.56353e-05
ENSG00000086619	ERO1LB	ERO1-like beta (S. cerevisiae) [Source:HGNC Symbol;Acc:14355]	-0.789571	3.01449	25.907	3.58266e-07	1.61755e-05
ENSG00000169855	ROBO1	roundabout, axon guidance receptor, homolog 1 (Drosophila) [Source:HGNC Symbol;Acc:10249]	-0.325812	6.83483	25.8919	3.61083e-07	1.62531e-05
ENSG00000113558	SKP1	S-phase kinase-associated protein 1 [Source:HGNC Symbol;Acc:10899]	-0.29638	8.47761	25.7705	3.84516e-07	1.72555e-05
ENSG00000168005	C11orf84	chromosome 11 open reading frame 84 [Source:HGNC Symbol;Acc:25115]	0.520259	5.77851	25.7612	3.86377e-07	1.72866e-05
ENSG00000146674	IGFBP3	insulin-like growth factor binding protein 3 [Source:HGNC Symbol;Acc:5472]	-1.40348	1.32116	25.7216	3.9438e-07	1.75915e-05
ENSG00000213853	EMP2	epithelial membrane protein 2 [Source:HGNC Symbol;Acc:3334]	-0.444558	5.38641	25.5863	4.23033e-07	1.88129e-05
ENSG00000183726	TMEM50A	transmembrane protein 50A [Source:HGNC Symbol;Acc:30590]	-0.364822	6.35623	25.5274	4.3615e-07	1.92921e-05
ENSG00000161692	DBF4B	DBF4 homolog B (S. cerevisiae) [Source:HGNC Symbol;Acc:17883]	0.46523	5.5656	25.5262	4.36415e-07	1.92921e-05
ENSG00000162631	NTNG1	netrin G1 [Source:HGNC Symbol;Acc:23319]	-0.728885	3.05496	25.3305	4.83022e-07	2.12889e-05
ENSG00000108256	NUFIP2	nuclear fragile X mental retardation protein interacting protein 2 [Source:HGNC Symbol;Acc:17634]	0.295307	8.93869	25.3247	4.84466e-07	2.12892e-05
ENSG00000130204	TOMM40	translocase of outer mitochondrial membrane 40 homolog (yeast) [Source:HGNC Symbol;Acc:18001]	0.4323	5.96155	25.2849	4.94578e-07	2.16692e-05
ENSG00000181026	AEN	apoptosis enhancing nuclease [Source:HGNC Symbol;Acc:25722]	0.33523	7.69313	25.1109	5.41262e-07	2.36447e-05
ENSG00000170836	PPM1D	protein phosphatase, Mg2+/Mn2+ dependent, 1D [Source:HGNC Symbol;Acc:9277]	-0.361044	7.03981	25.0285	5.64898e-07	2.46046e-05
ENSG00000153956	CACNA2D1	calcium channel, voltage-dependent, alpha 2/delta subunit 1 [Source:HGNC Symbol;Acc:1399]	-0.376695	6.44138	25.0163	5.68465e-07	2.46874e-05
ENSG00000120733	KDM3B	lysine (K)-specific demethylase 3B [Source:HGNC Symbol;Acc:1337]	-0.309613	7.48716	24.9693	5.82494e-07	2.52227e-05
ENSG00000145050	MANF	mesencephalic astrocyte-derived neurotrophic factor [Source:HGNC Symbol;Acc:15461]	0.381376	6.39437	24.8781	6.10726e-07	2.6368e-05
ENSG00000167549	CORO6	coronin 6 [Source:HGNC Symbol;Acc:21356]	-1.25527	1.56833	24.8238	6.28171e-07	2.70424e-05
ENSG00000119138	KLF9	Kruppel-like factor 9 [Source:HGNC Symbol;Acc:1123]	-0.78977	3.05272	24.7948	6.37684e-07	2.73724e-05
ENSG00000153234	NR4A2	nuclear receptor subfamily 4, group A, member 2 [Source:HGNC Symbol;Acc:7981]	-1.06196	1.60663	24.7722	6.45199e-07	2.76149e-05
ENSG00000182718	ANXA2	annexin A2 [Source:HGNC Symbol;Acc:537]	-0.301093	7.25789	24.7454	6.54264e-07	2.79222e-05
ENSG00000144229	THSD7B	thrombospondin, type I, domain containing 7B [Source:HGNC Symbol;Acc:29348]	-0.426821	5.68319	24.7058	6.67824e-07	2.8419e-05
ENSG00000153395	LPCAT1	lysophosphatidylcholine acyltransferase 1 [Source:HGNC Symbol;Acc:25718]	0.387667	5.98577	24.6313	6.94133e-07	2.94539e-05
ENSG00000165507	C10orf10	chromosome 10 open reading frame 10 [Source:HGNC Symbol;Acc:23355]	-1.83717	0.308172	24.5896	7.09331e-07	3.00128e-05
ENSG00000107643	MAPK8	mitogen-activated protein kinase 8 [Source:HGNC Symbol;Acc:6881]	-0.366942	6.8688	24.5819	7.12168e-07	3.0047e-05
ENSG00000198805	PNP	purine nucleoside phosphorylase [Source:HGNC Symbol;Acc:7892]	0.477949	5.29379	24.4262	7.7211e-07	3.24835e-05
ENSG00000162669	HFM1	HFM1, ATP-dependent DNA helicase homolog (S. cerevisiae) [Source:HGNC Symbol;Acc:20193]	-0.783241	3.19059	24.4192	7.74923e-07	3.25095e-05
ENSG00000123106	CCDC91	coiled-coil domain containing 91 [Source:HGNC Symbol;Acc:24855]	-0.514061	5.03821	24.332	8.1081e-07	3.39189e-05
ENSG00000110066	SUV420H1	suppressor of variegation 4-20 homolog 1 (Drosophila) [Source:HGNC Symbol;Acc:24283]	-0.394461	6.12384	24.3143	8.18306e-07	3.4136e-05
ENSG00000238206	RP11-472B18.2		-1.39614	0.669281	24.3054	8.22082e-07	3.41972e-05
ENSG00000138760	SCARB2	scavenger receptor class B, member 2 [Source:HGNC Symbol;Acc:1665]	-0.288329	8.67133	24.2525	8.44964e-07	3.50414e-05
ENSG00000105204	DYRK1B	dual-specificity tyrosine-(Y)-phosphorylation regulated kinase 1B [Source:HGNC Symbol;Acc:3092]	-0.864664	2.73569	24.2476	8.47107e-07	3.50414e-05
ENSG00000088756	ARHGAP28	Rho GTPase activating protein 28 [Source:HGNC Symbol;Acc:25509]	-0.563697	4.20178	24.1319	8.99596e-07	3.71089e-05
ENSG00000115129	TP53I3	tumor protein p53 inducible protein 3 [Source:HGNC Symbol;Acc:19373]	-0.566414	4.16398	24.0672	9.30297e-07	3.82688e-05
ENSG00000114767	RRP9	ribosomal RNA processing 9, small subunit (SSU) processome component, homolog (yeast) [Source:HGNC Symbol;Acc:16829]	0.501155	5.60231	24.0523	9.37532e-07	3.8428e-05
ENSG00000143319	ISG20L2	interferon stimulated exonuclease gene 20kDa-like 2 [Source:HGNC Symbol;Acc:25745]	0.28516	8.1497	24.0486	9.39357e-07	3.8428e-05
ENSG00000117335	CD46	CD46 molecule, complement regulatory protein [Source:HGNC Symbol;Acc:6953]	-0.320711	7.7744	24.0068	9.59947e-07	3.91621e-05
ENSG00000236780	AC078941.1		-0.651773	3.5945	23.9417	9.92996e-07	4.03991e-05
ENSG00000164117	FBXO8	F-box protein 8 [Source:HGNC Symbol;Acc:13587]	-0.43821	5.3022	23.8907	1.01961e-06	4.13683e-05
ENSG00000164104	HMGB2	high mobility group box 2 [Source:HGNC Symbol;Acc:5000]	-0.263022	9.10529	23.8801	1.02526e-06	4.14838e-05
ENSG00000117410	ATP6V0B	ATPase, H+ transporting, lysosomal 21kDa, V0 subunit b [Source:HGNC Symbol;Acc:861]	0.40214	6.34897	23.7817	1.07903e-06	4.35405e-05
ENSG00000167771	RCOR2	REST corepressor 2 [Source:HGNC Symbol;Acc:27455]	0.424278	7.09583	23.7738	1.08348e-06	4.36014e-05
ENSG00000147256	ARHGAP36	Rho GTPase activating protein 36 [Source:HGNC Symbol;Acc:26388]	-0.533177	4.24482	23.7228	1.11255e-06	4.46498e-05
ENSG00000138433	CIR1	corepressor interacting with RBPJ, 1 [Source:HGNC Symbol;Acc:24217]	-0.483397	5.0478	23.6973	1.1274e-06	4.51234e-05
ENSG00000205978	NYNRIN	NYN domain and retroviral integrase containing [Source:HGNC Symbol;Acc:20165]	-0.483109	5.22577	23.6871	1.13342e-06	4.52422e-05
ENSG00000100100	PIK3IP1	phosphoinositide-3-kinase interacting protein 1 [Source:HGNC Symbol;Acc:24942]	-1.18097	1.19613	23.668	1.1447e-06	4.55696e-05
ENSG00000184305	FAM190A	family with sequence similarity 190, member A [Source:HGNC Symbol;Acc:29349]	1.14261	2.42399	23.582	1.19704e-06	4.75253e-05
ENSG00000138074	SLC5A6	solute carrier family 5 (sodium-dependent vitamin transporter), member 6 [Source:HGNC Symbol;Acc:11041]	0.380358	6.52553	23.5373	1.22515e-06	4.85115e-05
ENSG00000105372	RPS19	ribosomal protein S19 [Source:HGNC Symbol;Acc:10402]	0.33883	9.01666	23.4971	1.25101e-06	4.94034e-05
ENSG00000133872	TMEM66	transmembrane protein 66 [Source:HGNC Symbol;Acc:28789]	-0.305873	7.12816	23.4694	1.26915e-06	4.99862e-05
ENSG00000084093	REST	RE1-silencing transcription factor [Source:HGNC Symbol;Acc:9966]	-0.309044	6.97593	23.449	1.28272e-06	5.03867e-05
ENSG00000170734	POLH	polymerase (DNA directed), eta [Source:HGNC Symbol;Acc:9181]	0.473854	5.52754	23.388	1.32403e-06	5.18717e-05
ENSG00000156587	UBE2L6	ubiquitin-conjugating enzyme E2L 6 [Source:HGNC Symbol;Acc:12490]	-0.59604	3.90169	23.2839	1.39764e-06	5.46111e-05
ENSG00000064655	EYA2	eyes absent homolog 2 (Drosophila) [Source:HGNC Symbol;Acc:3520]	0.394108	5.81355	23.2751	1.40405e-06	5.47173e-05
ENSG00000172270	BSG	basigin (Ok blood group) [Source:HGNC Symbol;Acc:1116]	0.4009	7.42588	23.2201	1.44478e-06	5.61569e-05
ENSG00000143434	SEMA6C	sema domain, transmembrane domain (TM), and cytoplasmic domain, (semaphorin) 6C [Source:HGNC Symbol;Acc:10740]	-0.672946	4.55892	23.194	1.46453e-06	5.67754e-05
ENSG00000240342	RPS2P5	ribosomal protein S2 pseudogene 5 [Source:HGNC Symbol;Acc:31386]	0.582365	4.43571	23.1806	1.4748e-06	5.70243e-05
ENSG00000198952	SMG5	smg-5 homolog, nonsense mediated mRNA decay factor (C. elegans) [Source:HGNC Symbol;Acc:24644]	0.316969	8.7334	23.1755	1.47866e-06	5.70248e-05
ENSG00000143418	CERS2	ceramide synthase 2 [Source:HGNC Symbol;Acc:14076]	0.293248	8.10257	23.1175	1.52401e-06	5.86208e-05
ENSG00000066427	ATXN3	ataxin 3 [Source:HGNC Symbol;Acc:7106]	-0.512663	4.69286	23.0873	1.5481e-06	5.93932e-05
ENSG00000223749	AC004383.4		-0.743268	2.59763	23.0702	1.56192e-06	5.97687e-05
ENSG00000119878	CRIPT	cysteine-rich PDZ-binding protein [Source:HGNC Symbol;Acc:14312]	-0.559062	4.28407	23.0641	1.56686e-06	5.98032e-05
ENSG00000054654	SYNE2	spectrin repeat containing, nuclear envelope 2 [Source:HGNC Symbol;Acc:17084]	-0.28053	7.6499	23.0182	1.60478e-06	6.1093e-05
ENSG00000158445	KCNB1	potassium voltage-gated channel, Shab-related subfamily, member 1 [Source:HGNC Symbol;Acc:6231]	-0.86464	2.71217	22.9881	1.63009e-06	6.18976e-05
ENSG00000144283	PKP4	plakophilin 4 [Source:HGNC Symbol;Acc:9026]	0.364828	6.09083	22.9418	1.66983e-06	6.32442e-05
ENSG00000261685	RP11-401P9.4		0.851066	5.00884	22.9057	1.7015e-06	6.42241e-05
ENSG00000059145	UNKL	unkempt homolog (Drosophila)-like [Source:HGNC Symbol;Acc:14184]	0.502708	4.76331	22.9024	1.70437e-06	6.42241e-05
ENSG00000033011	ALG1	asparagine-linked glycosylation 1, beta-1,4-mannosyltransferase homolog (S. cerevisiae) [Source:HGNC Symbol;Acc:18294]	0.702968	3.48817	22.894	1.71183e-06	6.43413e-05
ENSG00000168003	SLC3A2	solute carrier family 3 (activators of dibasic and neutral amino acid transport), member 2 [Source:HGNC Symbol;Acc:11026]	0.392887	6.66759	22.8769	1.72713e-06	6.4752e-05
ENSG00000129128	SPCS3	signal peptidase complex subunit 3 homolog (S. cerevisiae) [Source:HGNC Symbol;Acc:26212]	-0.319878	7.22752	22.8411	1.75962e-06	6.58035e-05
ENSG00000121741	ZMYM2	zinc finger, MYM-type 2 [Source:HGNC Symbol;Acc:12989]	-0.296156	7.71331	22.8301	1.7697e-06	6.60139e-05
ENSG00000173114	LRRN3	leucine rich repeat neuronal 3 [Source:HGNC Symbol;Acc:17200]	-0.741687	2.93785	22.8068	1.79131e-06	6.6652e-05
ENSG00000092621	PHGDH	phosphoglycerate dehydrogenase [Source:HGNC Symbol;Acc:8923]	0.382822	7.63782	22.6962	1.89746e-06	7.03474e-05
ENSG00000145715	RASA1	RAS p21 protein activator (GTPase activating protein) 1 [Source:HGNC Symbol;Acc:9871]	-0.40824	5.61613	22.6935	1.90012e-06	7.03474e-05
ENSG00000228451	SDAD1P1	SDA1 domain containing 1 pseudogene 1 [Source:HGNC Symbol;Acc:31403]	-1.14554	1.54396	22.6886	1.90497e-06	7.03508e-05
ENSG00000136942	RPL35	ribosomal protein L35 [Source:HGNC Symbol;Acc:10344]	0.348934	7.68837	22.6687	1.92482e-06	7.09072e-05
ENSG00000172869	DMXL1	Dmx-like 1 [Source:HGNC Symbol;Acc:2937]	-0.345119	6.33241	22.6575	1.93604e-06	7.10806e-05
ENSG00000157600	TMEM164	transmembrane protein 164 [Source:HGNC Symbol;Acc:26217]	-0.354401	6.33691	22.6543	1.93926e-06	7.10806e-05
ENSG00000176105	YES1	v-yes-1 Yamaguchi sarcoma viral oncogene homolog 1 [Source:HGNC Symbol;Acc:12841]	-0.336244	7.40945	22.6497	1.94393e-06	7.10806e-05
ENSG00000143476	DTL	denticleless E3 ubiquitin protein ligase homolog (Drosophila) [Source:HGNC Symbol;Acc:30288]	-0.314908	7.35631	22.6376	1.95619e-06	7.13526e-05
ENSG00000167775	CD320	CD320 molecule [Source:HGNC Symbol;Acc:16692]	0.656249	4.53847	22.6324	1.96153e-06	7.13716e-05
ENSG00000060709	RIMBP2	RIMS binding protein 2 [Source:HGNC Symbol;Acc:30339]	-0.887402	2.51487	22.6072	1.98743e-06	7.21369e-05
ENSG00000083799	CYLD	cylindromatosis (turban tumor syndrome) [Source:HGNC Symbol;Acc:2584]	-0.480135	4.85487	22.5597	2.03708e-06	7.37583e-05
ENSG00000117600	RP4-788L13.1	Lipid phosphate phosphatase-related protein type 4 [Source:UniProtKB/Swiss-Prot;Acc:Q7Z2D5]	0.357676	6.65585	22.4964	2.10534e-06	7.6044e-05
ENSG00000134899	ERCC5	excision repair cross-complementing rodent repair deficiency, complementation group 5 [Source:HGNC Symbol;Acc:3437]	-0.405885	5.81942	22.4801	2.12327e-06	7.6505e-05
ENSG00000239305	RNF103	ring finger protein 103 [Source:HGNC Symbol;Acc:12859]	-0.664867	3.48964	22.4728	2.13144e-06	7.66128e-05
ENSG00000124486	USP9X	ubiquitin specific peptidase 9, X-linked [Source:HGNC Symbol;Acc:12632]	-0.293966	7.40582	22.4272	2.18258e-06	7.82612e-05
ENSG00000104980	TIMM44	translocase of inner mitochondrial membrane 44 homolog (yeast) [Source:HGNC Symbol;Acc:17316]	0.469403	5.46321	22.4127	2.19909e-06	7.86628e-05
ENSG00000116133	DHCR24	24-dehydrocholesterol reductase [Source:HGNC Symbol;Acc:2859]	0.297551	8.12687	22.3981	2.21588e-06	7.90722e-05
ENSG00000100354	TNRC6B	trinucleotide repeat containing 6B [Source:HGNC Symbol;Acc:29190]	-0.373262	6.10607	22.3598	2.26059e-06	8.04737e-05
ENSG00000203875	SNHG5	small nucleolar RNA host gene 5 (non-protein coding) [Source:HGNC Symbol;Acc:21026]	0.299163	7.25855	22.3318	2.29373e-06	8.14575e-05
ENSG00000125772	GPCPD1	glycerophosphocholine phosphodiesterase GDE1 homolog (S. cerevisiae) [Source:HGNC Symbol;Acc:26957]	-0.476743	4.93052	22.3184	2.30979e-06	8.18318e-05
ENSG00000177700	POLR2L	polymerase (RNA) II (DNA directed) polypeptide L, 7.6kDa [Source:HGNC Symbol;Acc:9199]	0.515186	4.88755	22.292	2.34181e-06	8.27683e-05
ENSG00000026950	BTN3A1	butyrophilin, subfamily 3, member A1 [Source:HGNC Symbol;Acc:1138]	-0.801411	2.78229	22.2599	2.38124e-06	8.39614e-05
ENSG00000117399	CDC20	cell division cycle 20 homolog (S. cerevisiae) [Source:HGNC Symbol;Acc:1723]	0.358717	6.53201	22.2339	2.41377e-06	8.49063e-05
ENSG00000135111	TBX3	T-box 3 [Source:HGNC Symbol;Acc:11602]	-0.411957	5.41054	22.2232	2.42721e-06	8.51768e-05
ENSG00000131196	NFATC1	nuclear factor of activated T-cells, cytoplasmic, calcineurin-dependent 1 [Source:HGNC Symbol;Acc:7775]	-0.818978	2.39393	22.1787	2.48415e-06	8.68069e-05
ENSG00000143614	GATAD2B	GATA zinc finger domain containing 2B [Source:HGNC Symbol;Acc:30778]	-0.288546	7.82252	22.1777	2.48539e-06	8.68069e-05
ENSG00000172380	GNG12	guanine nucleotide binding protein (G protein), gamma 12 [Source:HGNC Symbol;Acc:19663]	-0.295721	7.54832	22.1424	2.53157e-06	8.82119e-05
ENSG00000145990	GFOD1	glucose-fructose oxidoreductase domain containing 1 [Source:HGNC Symbol;Acc:21096]	0.632478	3.74179	22.1349	2.54144e-06	8.83433e-05
ENSG00000244306	CTD-2314B22.3		-0.516989	4.46768	22.1305	2.54727e-06	8.83433e-05
ENSG00000155111	CDK19	cyclin-dependent kinase 19 [Source:HGNC Symbol;Acc:19338]	-0.398575	5.90899	22.0804	2.6146e-06	9.04664e-05
ENSG00000145247	OCIAD2	OCIA domain containing 2 [Source:HGNC Symbol;Acc:28685]	-0.362466	6.12581	22.0645	2.63638e-06	9.08526e-05
ENSG00000196776	CD47	CD47 molecule [Source:HGNC Symbol;Acc:1682]	0.31242	7.44157	22.0633	2.63803e-06	9.08526e-05
ENSG00000124614	RPS10	ribosomal protein S10 [Source:HGNC Symbol;Acc:10383]	0.274837	8.7597	22.0438	2.66498e-06	9.15678e-05
ENSG00000105409	ATP1A3	ATPase, Na+/K+ transporting, alpha 3 polypeptide [Source:HGNC Symbol;Acc:801]	0.410226	7.14879	22.0029	2.72238e-06	9.33236e-05
ENSG00000111875	ASF1A	ASF1 anti-silencing function 1 homolog A (S. cerevisiae) [Source:HGNC Symbol;Acc:20995]	-0.329205	6.70305	21.9672	2.77348e-06	9.48554e-05
ENSG00000076513	ANKRD13A	ankyrin repeat domain 13A [Source:HGNC Symbol;Acc:21268]	-0.392019	5.75784	21.9047	2.8653e-06	9.777e-05
ENSG00000178445	GLDC	glycine dehydrogenase (decarboxylating) [Source:HGNC Symbol;Acc:4313]	0.349309	6.16683	21.8904	2.88669e-06	9.82717e-05
ENSG00000168675	C18orf1	chromosome 18 open reading frame 1 [Source:HGNC Symbol;Acc:1224]	-0.616128	3.53158	21.8861	2.89327e-06	9.82717e-05
ENSG00000196141	SPATS2L	spermatogenesis associated, serine-rich 2-like [Source:HGNC Symbol;Acc:24574]	-0.503589	4.60289	21.8695	2.91841e-06	9.88987e-05
ENSG00000076248	UNG	uracil-DNA glycosylase [Source:HGNC Symbol;Acc:12572]	-0.320783	6.76777	21.8359	2.96998e-06	0.000100416
ENSG00000167658	EEF2	eukaryotic translation elongation factor 2 [Source:HGNC Symbol;Acc:3214]	0.373506	10.3414	21.8124	3.00648e-06	0.000101419
ENSG00000112186	CAP2	CAP, adenylate cyclase-associated protein, 2 (yeast) [Source:HGNC Symbol;Acc:20039]	-0.313301	6.80241	21.7852	3.04935e-06	0.000102632
ENSG00000116209	TMEM59	transmembrane protein 59 [Source:HGNC Symbol;Acc:1239]	-0.296007	7.39384	21.7266	3.14404e-06	0.000105578
ENSG00000005022	SLC25A5	solute carrier family 25 (mitochondrial carrier; adenine nucleotide translocator), member 5 [Source:HGNC Symbol;Acc:10991]	0.289205	7.6467	21.6685	3.24076e-06	0.00010858
ENSG00000105784	RUNDC3B	RUN domain containing 3B [Source:HGNC Symbol;Acc:30286]	-0.908589	1.8477	21.6572	3.25989e-06	0.000108975
ENSG00000137880	GCHFR	GTP cyclohydrolase I feedback regulator [Source:HGNC Symbol;Acc:4194]	-0.997885	1.67933	21.6089	3.34298e-06	0.0001115
ENSG00000100614	PPM1A	protein phosphatase, Mg2+/Mn2+ dependent, 1A [Source:HGNC Symbol;Acc:9275]	-0.367396	6.21868	21.5972	3.36334e-06	0.000111927
ENSG00000013588	GPRC5A	G protein-coupled receptor, family C, group 5, member A [Source:HGNC Symbol;Acc:9836]	-1.04737	1.5245	21.5918	3.37299e-06	0.000111997
ENSG00000110104	CCDC86	coiled-coil domain containing 86 [Source:HGNC Symbol;Acc:28359]	0.625803	4.37852	21.5814	3.3912e-06	0.00011235
ENSG00000179627	ZBTB42	zinc finger and BTB domain containing 42 [Source:HGNC Symbol;Acc:32550]	-1.07809	1.42428	21.5389	3.46719e-06	0.000114611
ENSG00000157107	FCHO2	FCH domain only 2 [Source:HGNC Symbol;Acc:25180]	-0.457205	5.2298	21.5052	3.52871e-06	0.000116385
ENSG00000013306	SLC25A39	solute carrier family 25, member 39 [Source:HGNC Symbol;Acc:24279]	0.40801	6.62116	21.4976	3.54275e-06	0.000116555
ENSG00000177192	PUS1	pseudouridylate synthase 1 [Source:HGNC Symbol;Acc:15508]	0.510744	4.80559	21.4939	3.54962e-06	0.000116555
ENSG00000205250	E2F4	E2F transcription factor 4, p107/p130-binding [Source:HGNC Symbol;Acc:3118]	0.423428	6.05088	21.4817	3.57215e-06	0.000117035
ENSG00000121749	TBC1D15	TBC1 domain family, member 15 [Source:HGNC Symbol;Acc:25694]	-0.390662	5.8824	21.4472	3.63711e-06	0.000118901
ENSG00000198838	RYR3	ryanodine receptor 3 [Source:HGNC Symbol;Acc:10485]	-0.482754	5.13861	21.4414	3.64804e-06	0.000118995
ENSG00000145495	MARCH6	membrane-associated ring finger (C3HC4) 6, E3 ubiquitin protein ligase [Source:HGNC Symbol;Acc:30550]	-0.26339	8.00038	21.3847	3.75767e-06	0.000122214
ENSG00000152795	HNRPDL	heterogeneous nuclear ribonucleoprotein D-like [Source:HGNC Symbol;Acc:5037]	-0.278418	9.64944	21.3818	3.76322e-06	0.000122214
ENSG00000124374	PAIP2B	poly(A) binding protein interacting protein 2B [Source:HGNC Symbol;Acc:29200]	-0.671707	3.24013	21.3774	3.77185e-06	0.000122226
ENSG00000118689	FOXO3	forkhead box O3 [Source:HGNC Symbol;Acc:3821]	-0.347813	6.4212	21.3531	3.82011e-06	0.00012352
ENSG00000154265	ABCA5	ATP-binding cassette, sub-family A (ABC1), member 5 [Source:HGNC Symbol;Acc:35]	-0.305428	7.52736	21.335	3.85633e-06	0.000124419
ENSG00000038219	BOD1L1	biorientation of chromosomes in cell division 1-like 1 [Source:HGNC Symbol;Acc:31792]	-0.281859	7.46378	21.3217	3.88313e-06	0.000125011
ENSG00000120088	CRHR1	corticotropin releasing hormone receptor 1 [Source:HGNC Symbol;Acc:2357]	-0.863322	2.04359	21.3107	3.90553e-06	0.000125357
ENSG00000225339	RP11-513I15.6		-0.329754	6.72017	21.307	3.91293e-06	0.000125357
ENSG00000137845	ADAM10	ADAM metallopeptidase domain 10 [Source:HGNC Symbol;Acc:188]	-0.274397	7.68444	21.3039	3.91927e-06	0.000125357
ENSG00000143570	SLC39A1	solute carrier family 39 (zinc transporter), member 1 [Source:HGNC Symbol;Acc:12876]	0.293247	8.00454	21.2333	4.06632e-06	0.000129599
ENSG00000261128	RP11-18F14.2		-0.72755	3.07833	21.2319	4.06939e-06	0.000129599
ENSG00000143164	DCAF6	DDB1 and CUL4 associated factor 6 [Source:HGNC Symbol;Acc:30002]	-0.384508	5.87463	21.1923	4.15438e-06	0.000132022
ENSG00000044574	HSPA5	heat shock 70kDa protein 5 (glucose-regulated protein, 78kDa) [Source:HGNC Symbol;Acc:5238]	0.373547	8.99089	21.1484	4.25057e-06	0.000134789
ENSG00000109046	WSB1	WD repeat and SOCS box containing 1 [Source:HGNC Symbol;Acc:19221]	-0.30673	7.20256	21.0745	4.41764e-06	0.000139788
ENSG00000087087	SRRT	serrate RNA effector molecule homolog (Arabidopsis) [Source:HGNC Symbol;Acc:24101]	0.330212	7.47716	21.0247	4.53407e-06	0.000142958
ENSG00000108799	EZH1	enhancer of zeste homolog 1 (Drosophila) [Source:HGNC Symbol;Acc:3526]	-0.379345	5.76444	21.0215	4.54151e-06	0.000142958
ENSG00000130227	XPO7	exportin 7 [Source:HGNC Symbol;Acc:14108]	-0.271763	7.76358	21.0193	4.54676e-06	0.000142958
ENSG00000091137	SLC26A4	solute carrier family 26, member 4 [Source:HGNC Symbol;Acc:8818]	-1.18201	0.867667	20.9271	4.77085e-06	0.000149685
ENSG00000157954	WIPI2	WD repeat domain, phosphoinositide interacting 2 [Source:HGNC Symbol;Acc:32225]	-0.366572	5.82514	20.9155	4.79993e-06	0.000150279
ENSG00000151012	SLC7A11	solute carrier family 7 (anionic amino acid transporter light chain, xc- system), member 11 [Source:HGNC Symbol;Acc:11059]	0.412989	5.94112	20.9072	4.82074e-06	0.000150544
ENSG00000134986	NREP	neuronal regeneration related protein homolog (rat) [Source:HGNC Symbol;Acc:16834]	-0.268207	8.70512	20.9041	4.82872e-06	0.000150544
ENSG00000154678	PDE1C	phosphodiesterase 1C, calmodulin-dependent 70kDa [Source:HGNC Symbol;Acc:8776]	-0.712096	2.93229	20.8752	4.90209e-06	0.000152511
ENSG00000086666	ZFAND6	zinc finger, AN1-type domain 6 [Source:HGNC Symbol;Acc:30164]	-0.301338	7.24829	20.8681	4.92025e-06	0.00015275
ENSG00000134684	YARS	tyrosyl-tRNA synthetase [Source:HGNC Symbol;Acc:12840]	0.275729	7.92571	20.8641	4.9304e-06	0.00015275
ENSG00000137962	ARHGAP29	Rho GTPase activating protein 29 [Source:HGNC Symbol;Acc:30207]	-0.463149	5.05255	20.8364	5.00229e-06	0.000154653
ENSG00000197557	TTC30A	tetratricopeptide repeat domain 30A [Source:HGNC Symbol;Acc:25853]	-0.633713	3.4517	20.8279	5.02459e-06	0.000155019
ENSG00000147364	FBXO25	F-box protein 25 [Source:HGNC Symbol;Acc:13596]	-0.549949	3.95483	20.755	5.21963e-06	0.000160199
ENSG00000162434	JAK1	Janus kinase 1 [Source:HGNC Symbol;Acc:6190]	-0.32861	6.2708	20.753	5.22484e-06	0.000160199
ENSG00000119537	KDSR	3-ketodihydrosphingosine reductase [Source:HGNC Symbol;Acc:4021]	-0.576168	4.42234	20.753	5.22494e-06	0.000160199
ENSG00000143437	ARNT	aryl hydrocarbon receptor nuclear translocator [Source:HGNC Symbol;Acc:700]	-0.276505	7.51181	20.7336	5.27825e-06	0.000161499
ENSG00000112182	BACH2	BTB and CNC homology 1, basic leucine zipper transcription factor 2 [Source:HGNC Symbol;Acc:14078]	-1.27669	1.76112	20.6668	5.46545e-06	0.000166882
ENSG00000168280	KIF5C	kinesin family member 5C [Source:HGNC Symbol;Acc:6325]	-0.281317	7.53264	20.6454	5.52684e-06	0.000168409
ENSG00000104725	NEFL	neurofilament, light polypeptide [Source:HGNC Symbol;Acc:7739]	0.340912	6.22078	20.6136	5.61954e-06	0.00017061
ENSG00000116984	MTR	5-methyltetrahydrofolate-homocysteine methyltransferase [Source:HGNC Symbol;Acc:7468]	-0.274418	7.32528	20.6127	5.62211e-06	0.00017061
ENSG00000206195	AP000525.8		-0.404304	5.54921	20.5889	5.69239e-06	0.00017239
ENSG00000163041	H3F3A	H3 histone, family 3A [Source:HGNC Symbol;Acc:4764]	-0.262605	7.89059	20.5245	5.88721e-06	0.000177926
ENSG00000140521	POLG	polymerase (DNA directed), gamma [Source:HGNC Symbol;Acc:9179]	0.402185	6.22163	20.5086	5.9363e-06	0.000179044
ENSG00000172201	ID4	inhibitor of DNA binding 4, dominant negative helix-loop-helix protein [Source:HGNC Symbol;Acc:5363]	-0.588837	4.11925	20.49	5.99448e-06	0.000180431
ENSG00000258441	LINC00641	long intergenic non-protein coding RNA 641 [Source:HGNC Symbol;Acc:27511]	-0.363061	6.10643	20.4735	6.04637e-06	0.000181624
ENSG00000128709	HOXD9	homeobox D9 [Source:HGNC Symbol;Acc:5140]	-0.791204	2.96732	20.4671	6.06648e-06	0.000181691
ENSG00000134508	CABLES1	Cdk5 and Abl enzyme substrate 1 [Source:HGNC Symbol;Acc:25097]	-0.552023	4.16272	20.465	6.07314e-06	0.000181691
ENSG00000198246	SLC29A3	solute carrier family 29 (nucleoside transporters), member 3 [Source:HGNC Symbol;Acc:23096]	-0.860204	2.27687	20.4538	6.10887e-06	0.000182392
ENSG00000152495	CAMK4	calcium/calmodulin-dependent protein kinase IV [Source:HGNC Symbol;Acc:1464]	-0.318281	6.52149	20.4278	6.19236e-06	0.000184512
ENSG00000109436	TBC1D9	TBC1 domain family, member 9 (with GRAM domain) [Source:HGNC Symbol;Acc:21710]	-0.519428	4.55366	20.4223	6.2102e-06	0.000184672
ENSG00000132522	GPS2	G protein pathway suppressor 2 [Source:HGNC Symbol;Acc:4550]	0.392571	5.55742	20.3947	6.30031e-06	0.000186623
ENSG00000179855	GIPC3	GIPC PDZ domain containing family, member 3 [Source:HGNC Symbol;Acc:18183]	-2.16952	-0.238424	20.3945	6.30101e-06	0.000186623
ENSG00000189067	LITAF	lipopolysaccharide-induced TNF factor [Source:HGNC Symbol;Acc:16841]	-0.667706	3.46005	20.384	6.33562e-06	0.000187274
ENSG00000135968	GCC2	GRIP and coiled-coil domain containing 2 [Source:HGNC Symbol;Acc:23218]	-0.31443	6.64388	20.3515	6.44417e-06	0.000190103
ENSG00000141510	TP53	tumor protein p53 [Source:HGNC Symbol;Acc:11998]	-0.372777	5.85066	20.2193	6.90519e-06	0.000203155
ENSG00000172974	AC007318.5		0.369868	5.74106	20.2169	6.91406e-06	0.000203155
ENSG00000158321	AUTS2	autism susceptibility candidate 2 [Source:HGNC Symbol;Acc:14262]	0.285147	7.35035	20.1884	7.01782e-06	0.000205796
ENSG00000133606	MKRN1	makorin ring finger protein 1 [Source:HGNC Symbol;Acc:7112]	-0.315197	6.52089	20.1472	7.17069e-06	0.000209863
ENSG00000204920	ZNF155	zinc finger protein 155 [Source:HGNC Symbol;Acc:12940]	-0.629085	3.51692	20.1315	7.22977e-06	0.000211175
ENSG00000168439	STIP1	stress-induced-phosphoprotein 1 [Source:HGNC Symbol;Acc:11387]	0.274791	8.66951	20.0877	7.39721e-06	0.00021564
ENSG00000189180	ZNF33A	zinc finger protein 33A [Source:HGNC Symbol;Acc:13096]	-0.311106	6.89513	20.0816	7.42076e-06	0.000215902
ENSG00000100320	RBFOX2	RNA binding protein, fox-1 homolog (C. elegans) 2 [Source:HGNC Symbol;Acc:9906]	-0.249362	8.19032	20.0771	7.43801e-06	0.000215979
ENSG00000235655	H3F3AP4	H3 histone, family 3A, pseudogene 4 [Source:HGNC Symbol;Acc:42980]	-0.330983	6.15515	20.069	7.46981e-06	0.000216478
ENSG00000123545	NDUFAF4	NADH dehydrogenase (ubiquinone) complex I, assembly factor 4 [Source:HGNC Symbol;Acc:21034]	0.33913	6.38235	20.0487	7.54949e-06	0.00021836
ENSG00000130287	NCAN	neurocan [Source:HGNC Symbol;Acc:2465]	-0.439225	4.9635	20.0043	7.7267e-06	0.000222933
ENSG00000064393	HIPK2	homeodomain interacting protein kinase 2 [Source:HGNC Symbol;Acc:14402]	-0.281873	7.42434	19.9986	7.75003e-06	0.000222933
ENSG00000137309	HMGA1	high mobility group AT-hook 1 [Source:HGNC Symbol;Acc:5010]	0.400457	7.75979	19.9964	7.75893e-06	0.000222933
ENSG00000146072	TNFRSF21	tumor necrosis factor receptor superfamily, member 21 [Source:HGNC Symbol;Acc:13469]	0.370482	5.67926	19.9931	7.77214e-06	0.000222933
ENSG00000148737	TCF7L2	transcription factor 7-like 2 (T-cell specific, HMG-box) [Source:HGNC Symbol;Acc:11641]	-0.491271	4.40564	19.9905	7.78287e-06	0.000222933
ENSG00000161016	RPL8	ribosomal protein L8 [Source:HGNC Symbol;Acc:10368]	0.364252	9.23648	19.9845	7.8071e-06	0.000223196
ENSG00000115541	HSPE1	heat shock 10kDa protein 1 (chaperonin 10) [Source:HGNC Symbol;Acc:5269]	0.249436	8.48675	19.9721	7.8581e-06	0.000224221
ENSG00000063245	EPN1	epsin 1 [Source:HGNC Symbol;Acc:21604]	0.555109	4.94583	19.962	7.89987e-06	0.000224979
ENSG00000065534	MYLK	myosin light chain kinase [Source:HGNC Symbol;Acc:7590]	-0.539626	3.83634	19.9108	8.11419e-06	0.000230308
ENSG00000144228	SPOPL	speckle-type POZ protein-like [Source:HGNC Symbol;Acc:27934]	-0.38018	5.5277	19.9098	8.11811e-06	0.000230308
ENSG00000169100	SLC25A6	solute carrier family 25 (mitochondrial carrier; adenine nucleotide translocator), member 6 [Source:HGNC Symbol;Acc:10992]	0.380931	7.64198	19.9009	8.15636e-06	0.000230951
ENSG00000126775	ATG14	autophagy related 14 [Source:HGNC Symbol;Acc:19962]	-0.401827	5.41438	19.7836	8.6725e-06	0.00024498
ENSG00000013293	SLC7A14	solute carrier family 7 (orphan transporter), member 14 [Source:HGNC Symbol;Acc:29326]	0.542393	4.47785	19.7808	8.6849e-06	0.00024498
ENSG00000163516	ANKZF1	ankyrin repeat and zinc finger domain containing 1 [Source:HGNC Symbol;Acc:25527]	-0.453792	4.81818	19.7748	8.71243e-06	0.00024529
ENSG00000114200	BCHE	butyrylcholinesterase [Source:HGNC Symbol;Acc:983]	-0.576685	3.88289	19.7635	8.76426e-06	0.000246281
ENSG00000164916	FOXK1	forkhead box K1 [Source:HGNC Symbol;Acc:23480]	-0.443428	5.68244	19.757	8.79405e-06	0.00024665
ENSG00000204628	GNB2L1	guanine nucleotide binding protein (G protein), beta polypeptide 2-like 1 [Source:HGNC Symbol;Acc:4399]	0.255873	10.1783	19.7294	8.92188e-06	0.000249762
ENSG00000135048	TMEM2	transmembrane protein 2 [Source:HGNC Symbol;Acc:11869]	0.347435	6.22534	19.6849	9.13215e-06	0.000254839
ENSG00000115365	LANCL1	LanC lantibiotic synthetase component C-like 1 (bacterial) [Source:HGNC Symbol;Acc:6508]	-0.283912	7.4032	19.6837	9.13764e-06	0.000254839
ENSG00000175866	BAIAP2	BAI1-associated protein 2 [Source:HGNC Symbol;Acc:947]	0.443564	5.62338	19.6166	9.46424e-06	0.000263451
ENSG00000185658	BRWD1	bromodomain and WD repeat domain containing 1 [Source:HGNC Symbol;Acc:12760]	-0.27652	7.54476	19.5873	9.61035e-06	0.000267016
ENSG00000132824	SERINC3	serine incorporator 3 [Source:HGNC Symbol;Acc:11699]	-0.359294	5.71855	19.5711	9.69246e-06	0.000268793
ENSG00000213760	ATP6V1G2	ATPase, H+ transporting, lysosomal 13kDa, V1 subunit G2 [Source:HGNC Symbol;Acc:862]	-0.774201	2.21106	19.5516	9.79197e-06	0.000271045
ENSG00000228032	C14orf144	chromosome 14 open reading frame 144 [Source:HGNC Symbol;Acc:20358]	-0.751031	2.28286	19.5409	9.84663e-06	0.000271639
ENSG00000198189	HSD17B11	hydroxysteroid (17-beta) dehydrogenase 11 [Source:HGNC Symbol;Acc:22960]	-0.522307	4.20989	19.5403	9.8501e-06	0.000271639
ENSG00000183010	PYCR1	pyrroline-5-carboxylate reductase 1 [Source:HGNC Symbol;Acc:9721]	0.356931	7.26366	19.5116	9.99901e-06	0.000275233
ENSG00000134954	ETS1	v-ets erythroblastosis virus E26 oncogene homolog 1 (avian) [Source:HGNC Symbol;Acc:3488]	-0.662733	3.19618	19.5001	1.00592e-05	0.000276377
ENSG00000134333	LDHA	lactate dehydrogenase A [Source:HGNC Symbol;Acc:6535]	0.232926	10.2668	19.4683	1.02283e-05	0.000280144
ENSG00000159199	ATP5G1	ATP synthase, H+ transporting, mitochondrial Fo complex, subunit C1 (subunit 9) [Source:HGNC Symbol;Acc:841]	0.295189	6.86044	19.4672	1.02342e-05	0.000280144
ENSG00000116649	SRM	spermidine synthase [Source:HGNC Symbol;Acc:11296]	0.546529	4.73055	19.4376	1.03942e-05	0.000283999
ENSG00000175376	EIF1AD	eukaryotic translation initiation factor 1A domain containing [Source:HGNC Symbol;Acc:28147]	0.415122	5.37632	19.4248	1.04642e-05	0.000285384
ENSG00000116521	SCAMP3	secretory carrier membrane protein 3 [Source:HGNC Symbol;Acc:10565]	0.311996	7.08401	19.3844	1.06878e-05	0.000290948
ENSG00000183878	UTY	ubiquitously transcribed tetratricopeptide repeat gene, Y-linked [Source:HGNC Symbol;Acc:12638]	-0.474702	4.57886	19.3707	1.07646e-05	0.0002925
ENSG00000123989	CHPF	chondroitin polymerizing factor [Source:HGNC Symbol;Acc:24291]	0.76378	3.21761	19.3605	1.08223e-05	0.00029353
ENSG00000125266	EFNB2	ephrin-B2 [Source:HGNC Symbol;Acc:3227]	0.638313	4.12768	19.312	1.11004e-05	0.000300138
ENSG00000162687	KCNT2	potassium channel, subfamily T, member 2 [Source:HGNC Symbol;Acc:18866]	-0.421209	5.07569	19.311	1.11064e-05	0.000300138
ENSG00000067596	DHX8	DEAH (Asp-Glu-Ala-His) box polypeptide 8 [Source:HGNC Symbol;Acc:2749]	-0.265999	7.59541	19.2985	1.11795e-05	0.00030156
ENSG00000204386	NEU1	sialidase 1 (lysosomal sialidase) [Source:HGNC Symbol;Acc:7758]	0.450142	5.22442	19.2899	1.12297e-05	0.000302031
ENSG00000052749	RRP12	ribosomal RNA processing 12 homolog (S. cerevisiae) [Source:HGNC Symbol;Acc:29100]	0.449575	5.85917	19.2886	1.12377e-05	0.000302031
ENSG00000187079	TEAD1	TEA domain family member 1 (SV40 transcriptional enhancer factor) [Source:HGNC Symbol;Acc:11714]	-0.244642	8.30715	19.2818	1.12777e-05	0.000302556
ENSG00000249307	RP11-438E5.1		-0.821443	1.96337	19.2684	1.13572e-05	0.000303595
ENSG00000108018	SORCS1	sortilin-related VPS10 domain containing receptor 1 [Source:HGNC Symbol;Acc:16697]	-0.300751	6.60465	19.2683	1.13574e-05	0.000303595
ENSG00000182134	TDRKH	tudor and KH domain containing [Source:HGNC Symbol;Acc:11713]	-0.40795	5.43504	19.2401	1.15264e-05	0.000307557
ENSG00000151553	FAM160B1	family with sequence similarity 160, member B1 [Source:HGNC Symbol;Acc:29320]	-0.471617	5.0039	19.2223	1.16345e-05	0.000309884
ENSG00000101040	ZMYND8	zinc finger, MYND-type containing 8 [Source:HGNC Symbol;Acc:9397]	-0.383843	5.63031	19.1931	1.18143e-05	0.000314106
ENSG00000083845	RPS5	ribosomal protein S5 [Source:HGNC Symbol;Acc:10426]	0.31008	7.79928	19.1726	1.19413e-05	0.000316916
ENSG00000116266	STXBP3	syntaxin binding protein 3 [Source:HGNC Symbol;Acc:11446]	-0.379229	5.68593	19.1464	1.21065e-05	0.000320726
ENSG00000196782	MAML3	mastermind-like 3 (Drosophila) [Source:HGNC Symbol;Acc:16272]	-0.64731	3.4649	19.1365	1.21698e-05	0.000321825
ENSG00000165312	OTUD1	OTU domain containing 1 [Source:HGNC Symbol;Acc:27346]	-1.21383	0.701342	19.1024	1.23892e-05	0.000327044
ENSG00000077254	USP33	ubiquitin specific peptidase 33 [Source:HGNC Symbol;Acc:20059]	-0.264254	7.83209	19.092	1.24564e-05	0.000328233
ENSG00000131711	MAP1B	microtubule-associated protein 1B [Source:HGNC Symbol;Acc:6836]	0.207504	10.4665	19.0557	1.2696e-05	0.000333953
ENSG00000076003	MCM6	minichromosome maintenance complex component 6 [Source:HGNC Symbol;Acc:6949]	-0.309913	7.39135	18.9956	1.31023e-05	0.000344029
ENSG00000213625	LEPROT	leptin receptor overlapping transcript [Source:HGNC Symbol;Acc:29477]	-0.372653	5.73172	18.9859	1.31691e-05	0.000345171
ENSG00000115307	AUP1	ancient ubiquitous protein 1 [Source:HGNC Symbol;Acc:891]	0.316565	6.73511	18.9602	1.33476e-05	0.00034923
ENSG00000150760	DOCK1	dedicator of cytokinesis 1 [Source:HGNC Symbol;Acc:2987]	-0.297542	6.40208	18.9475	1.34362e-05	0.000350928
ENSG00000140983	RHOT2	ras homolog family member T2 [Source:HGNC Symbol;Acc:21169]	0.466081	5.74628	18.9099	1.37042e-05	0.000357298
ENSG00000166851	PLK1	polo-like kinase 1 [Source:HGNC Symbol;Acc:9077]	0.376509	6.22824	18.8987	1.37847e-05	0.000358765
ENSG00000059588	TARBP1	TAR (HIV-1) RNA binding protein 1 [Source:HGNC Symbol;Acc:11568]	-0.360732	6.51492	18.8774	1.39398e-05	0.000361523
ENSG00000163873	GRIK3	glutamate receptor, ionotropic, kainate 3 [Source:HGNC Symbol;Acc:4581]	-0.477789	4.81646	18.8764	1.39469e-05	0.000361523
ENSG00000129757	CDKN1C	cyclin-dependent kinase inhibitor 1C (p57, Kip2) [Source:HGNC Symbol;Acc:1786]	-1.33755	0.980597	18.8741	1.39639e-05	0.000361523
ENSG00000139737	SLAIN1	SLAIN motif family, member 1 [Source:HGNC Symbol;Acc:26387]	0.269582	8.02854	18.8668	1.40175e-05	0.000362277
ENSG00000070756	PABPC1	poly(A) binding protein, cytoplasmic 1 [Source:HGNC Symbol;Acc:8554]	0.217588	9.91455	18.8411	1.42072e-05	0.000366541
ENSG00000162783	IER5	immediate early response 5 [Source:HGNC Symbol;Acc:5393]	0.374062	5.79265	18.834	1.42601e-05	0.000367266
ENSG00000181827	RFX7	regulatory factor X, 7 [Source:HGNC Symbol;Acc:25777]	-0.250074	7.95287	18.8302	1.4289e-05	0.00036737
ENSG00000174721	FGFBP3	fibroblast growth factor binding protein 3 [Source:HGNC Symbol;Acc:23428]	0.636036	3.58386	18.8221	1.43494e-05	0.000368285
ENSG00000206560	ANKRD28	ankyrin repeat domain 28 [Source:HGNC Symbol;Acc:29024]	-0.343238	6.3683	18.8023	1.44991e-05	0.000371472
ENSG00000160818	GPATCH4	G patch domain containing 4 [Source:HGNC Symbol;Acc:25982]	0.259437	8.46061	18.7991	1.45238e-05	0.000371472
ENSG00000117625	RCOR3	REST corepressor 3 [Source:HGNC Symbol;Acc:25594]	-0.318526	6.34314	18.7866	1.46194e-05	0.000373274
ENSG00000166450	PRTG	protogenin [Source:HGNC Symbol;Acc:26373]	-0.481663	4.3786	18.7657	1.47802e-05	0.00037673
ENSG00000178952	TUFM	Tu translation elongation factor, mitochondrial [Source:HGNC Symbol;Acc:12420]	0.321261	7.28512	18.7346	1.50228e-05	0.000382256
ENSG00000173812	EIF1	eukaryotic translation initiation factor 1 [Source:HGNC Symbol;Acc:3249]	0.234607	8.88552	18.6637	1.5592e-05	0.000396058
ENSG00000221983	UBA52	ubiquitin A-52 residue ribosomal protein fusion product 1 [Source:HGNC Symbol;Acc:12458]	0.258988	8.52556	18.5087	1.69132e-05	0.000428883
ENSG00000167085	PHB	prohibitin [Source:HGNC Symbol;Acc:8912]	0.276306	7.67519	18.496	1.70264e-05	0.000430298
ENSG00000257815	RP11-611E13.2		-1.39259	0.856762	18.4959	1.70271e-05	0.000430298
ENSG00000182568	SATB1	SATB homeobox 1 [Source:HGNC Symbol;Acc:10541]	-0.248665	8.19894	18.4791	1.7178e-05	0.000432815
ENSG00000127995	CASD1	CAS1 domain containing 1 [Source:HGNC Symbol;Acc:16014]	-0.355813	6.30244	18.4783	1.71852e-05	0.000432815
ENSG00000217165	ANKRD18EP	ankyrin repeat domain 18E, pseudogene [Source:HGNC Symbol;Acc:43609]	-0.73119	2.76972	18.4718	1.72434e-05	0.000433544
ENSG00000143190	POU2F1	POU class 2 homeobox 1 [Source:HGNC Symbol;Acc:9212]	-0.297427	6.49752	18.4608	1.73431e-05	0.000435311
ENSG00000230798	RP4-792G4.2		-1.55349	0.187743	18.4249	1.76734e-05	0.000441191
ENSG00000132205	EMILIN2	elastin microfibril interfacer 2 [Source:HGNC Symbol;Acc:19881]	-0.471287	4.74128	18.4227	1.76936e-05	0.000441191
ENSG00000140332	TLE3	transducin-like enhancer of split 3 (E(sp1) homolog, Drosophila) [Source:HGNC Symbol;Acc:11839]	-0.369478	6.19773	18.4224	1.76961e-05	0.000441191
ENSG00000164889	SLC4A2	solute carrier family 4, anion exchanger, member 2 (erythrocyte membrane protein band 3-like 1) [Source:HGNC Symbol;Acc:11028]	0.43465	5.96461	18.4224	1.76965e-05	0.000441191
ENSG00000135549	PKIB	protein kinase (cAMP-dependent, catalytic) inhibitor beta [Source:HGNC Symbol;Acc:9018]	-0.469074	5.27797	18.4099	1.7813e-05	0.00044335
ENSG00000091129	NRCAM	neuronal cell adhesion molecule [Source:HGNC Symbol;Acc:7994]	-0.37057	5.4698	18.4015	1.78921e-05	0.000444571
ENSG00000164331	ANKRA2	ankyrin repeat, family A (RFXANK-like), 2 [Source:HGNC Symbol;Acc:13208]	-0.588302	3.7966	18.3952	1.79513e-05	0.000445294
ENSG00000206538	VGLL3	vestigial like 3 (Drosophila) [Source:HGNC Symbol;Acc:24327]	-0.548262	3.53897	18.3884	1.80156e-05	0.000446142
ENSG00000149273	RPS3	ribosomal protein S3 [Source:HGNC Symbol;Acc:10420]	0.235224	9.83069	18.3811	1.80841e-05	0.000447091
ENSG00000138613	APH1B	anterior pharynx defective 1 homolog B (C. elegans) [Source:HGNC Symbol;Acc:24080]	-0.533255	4.14739	18.3573	1.83115e-05	0.000451928
ENSG00000131724	IL13RA1	interleukin 13 receptor, alpha 1 [Source:HGNC Symbol;Acc:5974]	-0.584597	3.75475	18.3543	1.83408e-05	0.000451928
ENSG00000171724	VAT1L	vesicle amine transport protein 1 homolog (T. californica)-like [Source:HGNC Symbol;Acc:29315]	-0.818846	2.11145	18.3344	1.85329e-05	0.000455903
ENSG00000183741	CBX6	chromobox homolog 6 [Source:HGNC Symbol;Acc:1556]	0.444751	5.42346	18.3182	1.86913e-05	0.000459037
ENSG00000146007	ZMAT2	zinc finger, matrin-type 2 [Source:HGNC Symbol;Acc:26433]	-0.270745	7.02913	18.3065	1.88068e-05	0.000461109
ENSG00000188976	NOC2L	nucleolar complex associated 2 homolog (S. cerevisiae) [Source:HGNC Symbol;Acc:24517]	0.43875	5.60524	18.3001	1.88702e-05	0.000461898
ENSG00000095574	IKZF5	IKAROS family zinc finger 5 (Pegasus) [Source:HGNC Symbol;Acc:14283]	-0.392848	5.23641	18.2615	1.92557e-05	0.000470557
ENSG00000126878	AIF1L	allograft inflammatory factor 1-like [Source:HGNC Symbol;Acc:28904]	-0.516404	4.1473	18.2418	1.94562e-05	0.000474674
ENSG00000124193	SRSF6	serine/arginine-rich splicing factor 6 [Source:HGNC Symbol;Acc:10788]	-0.239156	8.66087	18.2081	1.98033e-05	0.000482348
ENSG00000168216	LMBRD1	LMBR1 domain containing 1 [Source:HGNC Symbol;Acc:23038]	-0.560938	3.76431	18.1661	2.02454e-05	0.000492306
ENSG00000246859	STARD4-AS1	STARD4 antisense RNA 1 [Source:HGNC Symbol;Acc:44117]	-0.418253	5.16975	18.1569	2.03434e-05	0.000493392
ENSG00000170647	TMEM133	transmembrane protein 133 [Source:HGNC Symbol;Acc:24033]	-0.439649	4.6112	18.1556	2.03567e-05	0.000493392
ENSG00000076108	BAZ2A	bromodomain adjacent to zinc finger domain, 2A [Source:HGNC Symbol;Acc:962]	-0.290291	7.42208	18.1144	2.08021e-05	0.000503362
ENSG00000214706	IFRD2	interferon-related developmental regulator 2 [Source:HGNC Symbol;Acc:5457]	0.432026	5.13199	18.0811	2.11698e-05	0.000511424
ENSG00000198626	RYR2	ryanodine receptor 2 (cardiac) [Source:HGNC Symbol;Acc:10484]	-0.386335	5.40808	18.0731	2.12581e-05	0.000512721
ENSG00000145349	CAMK2D	calcium/calmodulin-dependent protein kinase II delta [Source:HGNC Symbol;Acc:1462]	-0.30504	6.40422	18.0568	2.14415e-05	0.000516304
ENSG00000185008	ROBO2	roundabout, axon guidance receptor, homolog 2 (Drosophila) [Source:HGNC Symbol;Acc:10250]	0.634588	3.09027	18.0039	2.20455e-05	0.000529988
ENSG00000168843	FSTL5	follistatin-like 5 [Source:HGNC Symbol;Acc:21386]	-1.2325	0.732835	17.9612	2.25454e-05	0.000541126
ENSG00000110917	MLEC	malectin [Source:HGNC Symbol;Acc:28973]	0.252233	7.87027	17.947	2.27142e-05	0.000543873
ENSG00000084623	EIF3I	eukaryotic translation initiation factor 3, subunit I [Source:HGNC Symbol;Acc:3272]	0.257861	7.64735	17.9454	2.27333e-05	0.000543873
ENSG00000118217	ATF6	activating transcription factor 6 [Source:HGNC Symbol;Acc:791]	-0.269291	7.16585	17.9118	2.31387e-05	0.000552679
ENSG00000143401	ANP32E	acidic (leucine-rich) nuclear phosphoprotein 32 family, member E [Source:HGNC Symbol;Acc:16673]	-0.245352	10.3708	17.8977	2.33097e-05	0.000555866
ENSG00000156650	KAT6B	K(lysine) acetyltransferase 6B [Source:HGNC Symbol;Acc:17582]	-0.31913	6.034	17.8661	2.37009e-05	0.000564288
ENSG00000106789	CORO2A	coronin, actin binding protein, 2A [Source:HGNC Symbol;Acc:2255]	-0.959984	1.71821	17.8327	2.41208e-05	0.000573362
ENSG00000104517	UBR5	ubiquitin protein ligase E3 component n-recognin 5 [Source:HGNC Symbol;Acc:16806]	-0.237346	8.0947	17.8218	2.42584e-05	0.00057571
ENSG00000144619	CNTN4	contactin 4 [Source:HGNC Symbol;Acc:2174]	-0.840675	2.13052	17.7752	2.48599e-05	0.00058904
ENSG00000104356	POP1	processing of precursor 1, ribonuclease P/MRP subunit (S. cerevisiae) [Source:HGNC Symbol;Acc:30129]	0.278553	6.74409	17.7575	2.50923e-05	0.000593598
ENSG00000105576	TNPO2	transportin 2 [Source:HGNC Symbol;Acc:19998]	0.302181	7.39739	17.7473	2.52275e-05	0.000595084
ENSG00000116667	C1orf21	chromosome 1 open reading frame 21 [Source:HGNC Symbol;Acc:15494]	-0.396382	5.3604	17.7467	2.52355e-05	0.000595084
ENSG00000087586	AURKA	aurora kinase A [Source:HGNC Symbol;Acc:11393]	0.304032	6.38624	17.7331	2.54164e-05	0.000598395
ENSG00000144824	PHLDB2	pleckstrin homology-like domain, family B, member 2 [Source:HGNC Symbol;Acc:29573]	0.272869	7.2908	17.7287	2.54758e-05	0.000598842
ENSG00000251247	ZNF345	zinc finger protein 345 [Source:HGNC Symbol;Acc:16367]	-0.69144	3.04773	17.7193	2.56018e-05	0.000600851
ENSG00000167968	DNASE1L2	deoxyribonuclease I-like 2 [Source:HGNC Symbol;Acc:2958]	2.02392	-0.141795	17.7141	2.5671e-05	0.000601522
ENSG00000105220	GPI	glucose-6-phosphate isomerase [Source:HGNC Symbol;Acc:4458]	0.263572	7.52475	17.6856	2.60597e-05	0.000609527
ENSG00000136925	TSTD2	thiosulfate sulfurtransferase (rhodanese)-like domain containing 2 [Source:HGNC Symbol;Acc:30087]	-0.393838	5.20088	17.683	2.6095e-05	0.000609527
ENSG00000247077	PGAM5	phosphoglycerate mutase family member 5 [Source:HGNC Symbol;Acc:28763]	0.358635	5.62207	17.6566	2.64599e-05	0.000617079
ENSG00000064042	LIMCH1	LIM and calponin homology domains 1 [Source:HGNC Symbol;Acc:29191]	-0.351823	5.67577	17.6089	2.71318e-05	0.000631753
ENSG00000144834	TAGLN3	transgelin 3 [Source:HGNC Symbol;Acc:29868]	0.357454	5.91061	17.5641	2.77783e-05	0.000645792
ENSG00000007402	CACNA2D2	calcium channel, voltage-dependent, alpha 2/delta subunit 2 [Source:HGNC Symbol;Acc:1400]	-1.17349	0.998589	17.5535	2.79341e-05	0.000648395
ENSG00000204711	C9orf135	chromosome 9 open reading frame 135 [Source:HGNC Symbol;Acc:31422]	-1.33649	0.0288698	17.5429	2.80893e-05	0.000650978
ENSG00000234456	MAGI2-AS3	MAGI2 antisense RNA 3 [Source:HGNC Symbol;Acc:40862]	-0.316157	7.07971	17.5301	2.82797e-05	0.000654349
ENSG00000075945	KIFAP3	kinesin-associated protein 3 [Source:HGNC Symbol;Acc:17060]	-0.357981	5.55637	17.5262	2.8337e-05	0.000654349
ENSG00000100505	TRIM9	tripartite motif containing 9 [Source:HGNC Symbol;Acc:16288]	0.494612	4.50546	17.5242	2.83674e-05	0.000654349
ENSG00000198837	DENND4B	DENN/MADD domain containing 4B [Source:HGNC Symbol;Acc:29044]	0.34562	7.42695	17.4955	2.87983e-05	0.000663257
ENSG00000148120	C9orf3	chromosome 9 open reading frame 3 [Source:HGNC Symbol;Acc:1361]	-0.385978	5.08899	17.437	2.96985e-05	0.000682469
ENSG00000104936	DMPK	dystrophia myotonica-protein kinase [Source:HGNC Symbol;Acc:2933]	0.575316	4.77543	17.4353	2.97247e-05	0.000682469
ENSG00000175567	UCP2	uncoupling protein 2 (mitochondrial, proton carrier) [Source:HGNC Symbol;Acc:12518]	-0.512797	4.43566	17.3678	3.08004e-05	0.000706074
ENSG00000162105	SHANK2	SH3 and multiple ankyrin repeat domains 2 [Source:HGNC Symbol;Acc:14295]	-0.507271	4.64883	17.3295	3.14263e-05	0.000719307
ENSG00000164754	RAD21	RAD21 homolog (S. pombe) [Source:HGNC Symbol;Acc:9811]	-0.232831	8.89096	17.3257	3.14907e-05	0.000719669
ENSG00000139926	FRMD6	FERM domain containing 6 [Source:HGNC Symbol;Acc:19839]	-0.429311	4.96663	17.3095	3.17594e-05	0.000724692
ENSG00000104904	OAZ1	ornithine decarboxylase antizyme 1 [Source:HGNC Symbol;Acc:8095]	0.287702	7.66368	17.3023	3.18794e-05	0.00072631
ENSG00000082512	TRAF5	TNF receptor-associated factor 5 [Source:HGNC Symbol;Acc:12035]	-0.32775	5.95965	17.2807	3.22444e-05	0.000732741
ENSG00000236552	RPL13AP5	ribosomal protein L13a pseudogene 5 [Source:HGNC Symbol;Acc:23736]	0.758992	3.40747	17.2783	3.22845e-05	0.000732741
ENSG00000119397	CNTRL	centriolin [Source:HGNC Symbol;Acc:1858]	-0.34003	5.82856	17.2768	3.23101e-05	0.000732741
ENSG00000198420	FAM115A	family with sequence similarity 115, member A [Source:HGNC Symbol;Acc:22201]	-0.259424	7.46987	17.246	3.28394e-05	0.000743606
ENSG00000134809	TIMM10	translocase of inner mitochondrial membrane 10 homolog (yeast) [Source:HGNC Symbol;Acc:11814]	0.445051	4.51922	17.2281	3.31491e-05	0.000749473
ENSG00000066926	FECH	ferrochelatase [Source:HGNC Symbol;Acc:3647]	-0.379381	5.42153	17.2089	3.34858e-05	0.000755581
ENSG00000166016	ABTB2	ankyrin repeat and BTB (POZ) domain containing 2 [Source:HGNC Symbol;Acc:23842]	1.14636	2.04407	17.2018	3.36124e-05	0.000755581
ENSG00000163932	PRKCD	protein kinase C, delta [Source:HGNC Symbol;Acc:9399]	-1.27278	0.964005	17.2016	3.36156e-05	0.000755581
ENSG00000125247	TMTC4	transmembrane and tetratricopeptide repeat containing 4 [Source:HGNC Symbol;Acc:25904]	-0.352695	5.57031	17.2011	3.36233e-05	0.000755581
ENSG00000101444	AHCY	adenosylhomocysteinase [Source:HGNC Symbol;Acc:343]	0.262014	7.70462	17.1885	3.38481e-05	0.000759479
ENSG00000160193	WDR4	WD repeat domain 4 [Source:HGNC Symbol;Acc:12756]	0.45706	4.66608	17.1474	3.45877e-05	0.000773742
ENSG00000101654	RNMT	RNA (guanine-7-) methyltransferase [Source:HGNC Symbol;Acc:10075]	-0.272039	7.19372	17.1474	3.45882e-05	0.000773742
ENSG00000069712	KIAA1107	KIAA1107 [Source:HGNC Symbol;Acc:29192]	-1.03095	1.52336	17.1314	3.48804e-05	0.000779102
ENSG00000167173	C15orf39	chromosome 15 open reading frame 39 [Source:HGNC Symbol;Acc:24497]	0.539143	4.46213	17.0692	3.60412e-05	0.000803818
ENSG00000158470	B4GALT5	UDP-Gal:betaGlcNAc beta 1,4- galactosyltransferase, polypeptide 5 [Source:HGNC Symbol;Acc:928]	0.2628	7.04225	17.065	3.61211e-05	0.000804386
ENSG00000160716	CHRNB2	cholinergic receptor, nicotinic, beta 2 (neuronal) [Source:HGNC Symbol;Acc:1962]	0.333886	6.60034	17.0345	3.6706e-05	0.000816186
ENSG00000135624	CCT7	chaperonin containing TCP1, subunit 7 (eta) [Source:HGNC Symbol;Acc:1622]	0.216232	9.63882	16.9964	3.74512e-05	0.000831507
ENSG00000198034	RPS4X	ribosomal protein S4, X-linked [Source:HGNC Symbol;Acc:10424]	0.205673	10.0042	16.9772	3.78308e-05	0.000838676
ENSG00000121577	POPDC2	popeye domain containing 2 [Source:HGNC Symbol;Acc:17648]	-1.26345	1.25745	16.9671	3.80333e-05	0.000841907
ENSG00000075826	SEC31B	SEC31 homolog B (S. cerevisiae) [Source:HGNC Symbol;Acc:23197]	0.570114	3.76489	16.9639	3.80971e-05	0.000842059
ENSG00000108561	C1QBP	complement component 1, q subcomponent binding protein [Source:HGNC Symbol;Acc:1243]	0.249316	7.68944	16.9597	3.81826e-05	0.000842692
ENSG00000203644	AC083799.1		-0.776948	2.23227	16.9496	3.83846e-05	0.000845411
ENSG00000141639	MAPK4	mitogen-activated protein kinase 4 [Source:HGNC Symbol;Acc:6878]	-0.552237	3.55305	16.9479	3.842e-05	0.000845411
ENSG00000148300	REXO4	REX4, RNA exonuclease 4 homolog (S. cerevisiae) [Source:HGNC Symbol;Acc:12820]	0.43423	4.91264	16.9273	3.88382e-05	0.000853345
ENSG00000150990	DHX37	DEAH (Asp-Glu-Ala-His) box polypeptide 37 [Source:HGNC Symbol;Acc:17210]	0.392393	5.62467	16.9195	3.89979e-05	0.000855586
ENSG00000188229	TUBB4B	tubulin, beta 4B class IVb [Source:HGNC Symbol;Acc:20771]	0.328362	7.55585	16.9096	3.92029e-05	0.00085881
ENSG00000049656	CLPTM1L	CLPTM1-like [Source:HGNC Symbol;Acc:24308]	0.295844	6.71338	16.9018	3.93651e-05	0.00086109
ENSG00000166441	RPL27A	ribosomal protein L27a [Source:HGNC Symbol;Acc:10329]	0.243986	8.70274	16.8775	3.98714e-05	0.000870879
ENSG00000076356	PLXNA2	plexin A2 [Source:HGNC Symbol;Acc:9100]	-0.925966	1.71393	16.8476	4.05046e-05	0.000883405
ENSG00000143507	DUSP10	dual specificity phosphatase 10 [Source:HGNC Symbol;Acc:3065]	-0.797448	3.01581	16.8397	4.06725e-05	0.000885763
ENSG00000146425	DYNLT1	dynein, light chain, Tctex-type 1 [Source:HGNC Symbol;Acc:11697]	-0.256228	7.9554	16.8246	4.09975e-05	0.000891529
ENSG00000109929	SC5DL	sterol-C5-desaturase (ERG3 delta-5-desaturase homolog, S. cerevisiae)-like [Source:HGNC Symbol;Acc:10547]	-0.337296	5.76634	16.8179	4.11432e-05	0.000893386
ENSG00000107957	SH3PXD2A	SH3 and PX domains 2A [Source:HGNC Symbol;Acc:23664]	-0.292745	6.8935	16.807	4.138e-05	0.000897213
ENSG00000154511	FAM69A	family with sequence similarity 69, member A [Source:HGNC Symbol;Acc:32213]	-0.351293	5.90068	16.8008	4.1515e-05	0.000898825
ENSG00000095203	EPB41L4B	erythrocyte membrane protein band 4.1 like 4B [Source:HGNC Symbol;Acc:19818]	-0.662999	2.79003	16.7932	4.16817e-05	0.000901116
ENSG00000143494	VASH2	vasohibin 2 [Source:HGNC Symbol;Acc:25723]	-0.324097	6.16584	16.7839	4.18872e-05	0.000904238
ENSG00000170142	UBE2E1	ubiquitin-conjugating enzyme E2E 1 [Source:HGNC Symbol;Acc:12477]	-0.27787	7.08898	16.7783	4.20101e-05	0.000905226
ENSG00000125398	SOX9	SRY (sex determining region Y)-box 9 [Source:HGNC Symbol;Acc:11204]	-0.537856	3.54812	16.7763	4.20552e-05	0.000905226
ENSG00000111832	RWDD1	RWD domain containing 1 [Source:HGNC Symbol;Acc:20993]	0.350097	5.90178	16.7586	4.24496e-05	0.00091239
ENSG00000130517	PGPEP1	pyroglutamyl-peptidase I [Source:HGNC Symbol;Acc:13568]	-0.500896	4.3148	16.742	4.28214e-05	0.000919046
ENSG00000183023	SLC8A1	solute carrier family 8 (sodium/calcium exchanger), member 1 [Source:HGNC Symbol;Acc:11068]	0.76186	3.06711	16.7321	4.30473e-05	0.000922558
ENSG00000108679	LGALS3BP	lectin, galactoside-binding, soluble, 3 binding protein [Source:HGNC Symbol;Acc:6564]	-0.63878	3.29257	16.7256	4.31943e-05	0.000924371
ENSG00000129518	EAPP	E2F-associated phosphoprotein [Source:HGNC Symbol;Acc:19312]	-0.408522	4.78358	16.6629	4.46447e-05	0.000953856
ENSG00000165655	ZNF503	zinc finger protein 503 [Source:HGNC Symbol;Acc:23589]	0.514217	4.30509	16.6606	4.47009e-05	0.000953856
ENSG00000007062	PROM1	prominin 1 [Source:HGNC Symbol;Acc:9454]	-1.72194	-0.650911	16.6166	4.57493e-05	0.000974823
ENSG00000165637	VDAC2	voltage-dependent anion channel 2 [Source:HGNC Symbol;Acc:12672]	0.261579	7.43424	16.6122	4.5854e-05	0.000975649
ENSG00000073849	ST6GAL1	ST6 beta-galactosamide alpha-2,6-sialyltranferase 1 [Source:HGNC Symbol;Acc:10860]	-0.301817	6.1269	16.5956	4.62581e-05	0.000982836
ENSG00000111669	TPI1	triosephosphate isomerase 1 [Source:HGNC Symbol;Acc:12009]	0.228402	8.98633	16.5851	4.65155e-05	0.000986889
ENSG00000176595	KBTBD11	kelch repeat and BTB (POZ) domain containing 11 [Source:HGNC Symbol;Acc:29104]	-0.534635	3.98407	16.5596	4.71458e-05	0.000998831
ENSG00000163082	SGPP2	sphingosine-1-phosphate phosphatase 2 [Source:HGNC Symbol;Acc:19953]	-0.628026	3.06929	16.5407	4.7618e-05	0.00100739
ENSG00000122299	ZC3H7A	zinc finger CCCH-type containing 7A [Source:HGNC Symbol;Acc:30959]	-0.305961	6.67897	16.5077	4.84522e-05	0.00102358
ENSG00000149557	FEZ1	fasciculation and elongation protein zeta 1 (zygin I) [Source:HGNC Symbol;Acc:3659]	-0.851587	1.92477	16.481	4.91398e-05	0.00103663
ENSG00000073910	FRY	furry homolog (Drosophila) [Source:HGNC Symbol;Acc:20367]	-0.663392	2.40928	16.477	4.92451e-05	0.00103712
ENSG00000143149	ALDH9A1	aldehyde dehydrogenase 9 family, member A1 [Source:HGNC Symbol;Acc:412]	-0.25677	7.1536	16.4747	4.93031e-05	0.00103712
ENSG00000112319	EYA4	eyes absent homolog 4 (Drosophila) [Source:HGNC Symbol;Acc:3522]	-0.328348	5.9134	16.4699	4.94277e-05	0.00103826
ENSG00000114127	XRN1	5'-3' exoribonuclease 1 [Source:HGNC Symbol;Acc:30654]	-0.329649	6.1066	16.4545	4.9831e-05	0.00104525
ENSG00000204394	VARS	valyl-tRNA synthetase [Source:HGNC Symbol;Acc:12651]	0.33494	7.28128	16.4204	5.07372e-05	0.00106275
ENSG00000133874	RNF122	ring finger protein 122 [Source:HGNC Symbol;Acc:21147]	-0.532484	3.77812	16.407	5.1097e-05	0.00106878
ENSG00000102316	MAGED2	melanoma antigen family D, 2 [Source:HGNC Symbol;Acc:16353]	-0.294109	6.53642	16.3996	5.12958e-05	0.00107142
ENSG00000188158	NHS	Nance-Horan syndrome (congenital cataracts and dental anomalies) [Source:HGNC Symbol;Acc:7820]	-0.773217	2.17378	16.3654	5.22312e-05	0.00108942
ENSG00000232434	C9orf172	chromosome 9 open reading frame 172 [Source:HGNC Symbol;Acc:37284]	1.42156	0.725959	16.3517	5.26084e-05	0.00109575
ENSG00000168028	RPSA	ribosomal protein SA [Source:HGNC Symbol;Acc:6502]	0.212213	9.76009	16.3379	5.29921e-05	0.00110219
ENSG00000166833	NAV2	neuron navigator 2 [Source:HGNC Symbol;Acc:15997]	-0.458115	4.57952	16.308	5.38354e-05	0.00111816
ENSG00000105464	GRIN2D	glutamate receptor, ionotropic, N-methyl D-aspartate 2D [Source:HGNC Symbol;Acc:4588]	-0.688041	2.6982	16.2948	5.42126e-05	0.00112442
ENSG00000141522	ARHGDIA	Rho GDP dissociation inhibitor (GDI) alpha [Source:HGNC Symbol;Acc:678]	0.385841	7.35636	16.2775	5.47087e-05	0.00113239
ENSG00000103995	CEP152	centrosomal protein 152kDa [Source:HGNC Symbol;Acc:29298]	0.278595	6.75472	16.2761	5.47498e-05	0.00113239
ENSG00000109381	ELF2	E74-like factor 2 (ets domain transcription factor) [Source:HGNC Symbol;Acc:3317]	-0.372899	5.39555	16.269	5.49558e-05	0.00113506
ENSG00000105193	RPS16	ribosomal protein S16 [Source:HGNC Symbol;Acc:10396]	0.30144	8.40099	16.2453	5.56462e-05	0.00114772
ENSG00000132003	ZSWIM4	zinc finger, SWIM-type containing 4 [Source:HGNC Symbol;Acc:25704]	-0.701622	2.96534	16.235	5.59497e-05	0.00115169
ENSG00000197530	MIB2	mindbomb E3 ubiquitin protein ligase 2 [Source:HGNC Symbol;Acc:30577]	0.922916	2.53911	16.2335	5.5994e-05	0.00115169
ENSG00000127947	PTPN12	protein tyrosine phosphatase, non-receptor type 12 [Source:HGNC Symbol;Acc:9645]	-0.274644	6.78941	16.2249	5.62488e-05	0.00115532
ENSG00000176124	DLEU1	deleted in lymphocytic leukemia 1 (non-protein coding) [Source:HGNC Symbol;Acc:13747]	0.527668	3.81463	16.222	5.63354e-05	0.0011555
ENSG00000163931	TKT	transketolase [Source:HGNC Symbol;Acc:11834]	0.319354	7.41985	16.2149	5.65485e-05	0.00115827
ENSG00000181754	AMIGO1	adhesion molecule with Ig-like domain 1 [Source:HGNC Symbol;Acc:20824]	-0.606316	3.40753	16.1985	5.70398e-05	0.00116511
ENSG00000138650	PCDH10	protocadherin 10 [Source:HGNC Symbol;Acc:13404]	0.715715	2.71702	16.1985	5.70402e-05	0.00116511
ENSG00000115268	RPS15	ribosomal protein S15 [Source:HGNC Symbol;Acc:10388]	0.363673	7.30851	16.1698	5.7911e-05	0.00118127
ENSG00000112294	ALDH5A1	aldehyde dehydrogenase 5 family, member A1 [Source:HGNC Symbol;Acc:408]	-0.450089	4.49686	16.1542	5.83877e-05	0.00118809
ENSG00000115694	STK25	serine/threonine kinase 25 [Source:HGNC Symbol;Acc:11404]	0.318917	6.22982	16.1537	5.84058e-05	0.00118809
ENSG00000074071	MRPS34	mitochondrial ribosomal protein S34 [Source:HGNC Symbol;Acc:16618]	0.40511	5.32212	16.1498	5.85256e-05	0.0011889
ENSG00000143013	LMO4	LIM domain only 4 [Source:HGNC Symbol;Acc:6644]	-0.248649	7.51426	16.1223	5.93804e-05	0.00120461
ENSG00000121879	PIK3CA	phosphatidylinositol-4,5-bisphosphate 3-kinase, catalytic subunit alpha [Source:HGNC Symbol;Acc:8975]	-0.347846	5.65137	16.1105	5.97527e-05	0.0012105
ENSG00000120254	MTHFD1L	methylenetetrahydrofolate dehydrogenase (NADP+ dependent) 1-like [Source:HGNC Symbol;Acc:21055]	0.275236	6.77232	16.1066	5.98741e-05	0.0012113
ENSG00000175147	C1orf126	chromosome 1 open reading frame 126 [Source:HGNC Symbol;Acc:26301]	2.90979	-0.146109	16.0944	6.02617e-05	0.00121748
ENSG00000138641	HERC3	HECT and RLD domain containing E3 ubiquitin protein ligase 3 [Source:HGNC Symbol;Acc:4876]	-0.588165	3.04232	16.0856	6.0542e-05	0.00122148
ENSG00000146648	EGFR	epidermal growth factor receptor [Source:HGNC Symbol;Acc:3236]	-0.553948	3.26699	16.0787	6.07642e-05	0.0012243
ENSG00000171456	ASXL1	additional sex combs like 1 (Drosophila) [Source:HGNC Symbol;Acc:18318]	-0.283625	6.72684	16.0726	6.09607e-05	0.00122587
ENSG00000073711	PPP2R3A	protein phosphatase 2, regulatory subunit B'', alpha [Source:HGNC Symbol;Acc:9307]	-0.475572	4.24269	16.0711	6.10078e-05	0.00122587
ENSG00000173531	MST1	macrophage stimulating 1 (hepatocyte growth factor-like) [Source:HGNC Symbol;Acc:7380]	1.12897	1.75683	16.0456	6.18347e-05	0.00124051
ENSG00000162373	BEND5	BEN domain containing 5 [Source:HGNC Symbol;Acc:25668]	-0.55025	3.46028	16.0435	6.1904e-05	0.00124051
ENSG00000071564	TCF3	transcription factor 3 (E2A immunoglobulin enhancer binding factors E12/E47) [Source:HGNC Symbol;Acc:11633]	0.313634	7.80752	16.0229	6.25808e-05	0.00125238
ENSG00000144218	AFF3	AF4/FMR2 family, member 3 [Source:HGNC Symbol;Acc:6473]	-0.383487	5.00581	16.0133	6.29003e-05	0.00125707
ENSG00000119559	C19orf25	chromosome 19 open reading frame 25 [Source:HGNC Symbol;Acc:26711]	0.675943	3.25853	15.9943	6.35348e-05	0.00126683
ENSG00000144224	UBXN4	UBX domain protein 4 [Source:HGNC Symbol;Acc:14860]	-0.268497	7.79694	15.9935	6.35595e-05	0.00126683
ENSG00000177565	TBL1XR1	transducin (beta)-like 1 X-linked receptor 1 [Source:HGNC Symbol;Acc:29529]	-0.250556	7.82289	15.9866	6.3794e-05	0.00126979
ENSG00000145934	ODZ2	odz, odd Oz/ten-m homolog 2 (Drosophila) [Source:HGNC Symbol;Acc:29943]	1.06551	2.0671	15.9783	6.40717e-05	0.00127272
ENSG00000126602	TRAP1	TNF receptor-associated protein 1 [Source:HGNC Symbol;Acc:16264]	0.289444	6.84067	15.9771	6.41128e-05	0.00127272
ENSG00000084774	CAD	carbamoyl-phosphate synthetase 2, aspartate transcarbamylase, and dihydroorotase [Source:HGNC Symbol;Acc:1424]	0.323335	6.97715	15.954	6.49002e-05	0.00128662
ENSG00000174307	PHLDA3	pleckstrin homology-like domain, family A, member 3 [Source:HGNC Symbol;Acc:8934]	0.507444	4.83389	15.937	6.54877e-05	0.00129653
ENSG00000170921	TANC2	tetratricopeptide repeat, ankyrin repeat and coiled-coil containing 2 [Source:HGNC Symbol;Acc:30212]	-0.274598	6.83029	15.9337	6.55998e-05	0.00129702
ENSG00000179041	RRS1	RRS1 ribosome biogenesis regulator homolog (S. cerevisiae) [Source:HGNC Symbol;Acc:17083]	0.441465	4.8539	15.9298	6.57359e-05	0.00129798
ENSG00000179431	FJX1	four jointed box 1 (Drosophila) [Source:HGNC Symbol;Acc:17166]	0.47411	4.40569	15.9235	6.59556e-05	0.00130058
ENSG00000183684	ALYREF	Aly/REF export factor [Source:HGNC Symbol;Acc:19071]	0.266425	7.42695	15.911	6.63919e-05	0.00130744
ENSG00000229962	AP000221.1		-2.08044	-0.747395	15.9047	6.66132e-05	0.00131006
ENSG00000117971	CHRNB4	cholinergic receptor, nicotinic, beta 4 (neuronal) [Source:HGNC Symbol;Acc:1964]	-0.54446	4.89362	15.9006	6.67592e-05	0.00131119
ENSG00000167962	ZNF598	zinc finger protein 598 [Source:HGNC Symbol;Acc:28079]	0.452856	5.04903	15.8681	6.79125e-05	0.00133207
ENSG00000142541	RPL13A	ribosomal protein L13a [Source:HGNC Symbol;Acc:10304]	0.241126	9.92503	15.8584	6.82632e-05	0.00133718
ENSG00000136492	BRIP1	BRCA1 interacting protein C-terminal helicase 1 [Source:HGNC Symbol;Acc:20473]	-0.283475	6.98457	15.844	6.87834e-05	0.00134533
ENSG00000171316	CHD7	chromodomain helicase DNA binding protein 7 [Source:HGNC Symbol;Acc:20626]	-0.225186	8.02868	15.8419	6.88607e-05	0.00134533
ENSG00000090238	YPEL3	yippee-like 3 (Drosophila) [Source:HGNC Symbol;Acc:18327]	-1.12378	1.22113	15.8273	6.93927e-05	0.00135394
ENSG00000136718	IMP4	IMP4, U3 small nucleolar ribonucleoprotein, homolog (yeast) [Source:HGNC Symbol;Acc:30856]	0.309679	6.07485	15.8186	6.97133e-05	0.00135721
ENSG00000043143	PHF15	PHD finger protein 15 [Source:HGNC Symbol;Acc:22984]	-0.725055	2.30629	15.8165	6.97902e-05	0.00135721
ENSG00000112306	RPS12	ribosomal protein S12 [Source:HGNC Symbol;Acc:10385]	0.2052	9.2049	15.8153	6.98354e-05	0.00135721
ENSG00000131469	RPL27	ribosomal protein L27 [Source:HGNC Symbol;Acc:10328]	0.202544	10.3075	15.8049	7.02221e-05	0.00136294
ENSG00000198356	ASNA1	arsA arsenite transporter, ATP-binding, homolog 1 (bacterial) [Source:HGNC Symbol;Acc:752]	0.384375	5.63243	15.7886	7.08288e-05	0.00137291
ENSG00000170889	RPS9	ribosomal protein S9 [Source:HGNC Symbol;Acc:10442]	0.30339	7.86177	15.7848	7.09689e-05	0.00137383
ENSG00000256223	ZNF10	zinc finger protein 10 [Source:HGNC Symbol;Acc:12879]	-0.502023	4.25449	15.7661	7.16749e-05	0.00138568
ENSG00000165197	FIGF	c-fos induced growth factor (vascular endothelial growth factor D) [Source:HGNC Symbol;Acc:3708]	-0.790663	2.11982	15.721	7.34057e-05	0.00141729
ENSG00000132912	DCTN4	dynactin 4 (p62) [Source:HGNC Symbol;Acc:15518]	-0.244017	7.84062	15.7166	7.35741e-05	0.0014187
ENSG00000173068	BNC2	basonuclin 2 [Source:HGNC Symbol;Acc:30988]	-0.473317	4.00223	15.7109	7.3797e-05	0.00141941
ENSG00000141150	RASL10B	RAS-like, family 10, member B [Source:HGNC Symbol;Acc:30295]	0.513017	4.56409	15.7108	7.38029e-05	0.00141941
ENSG00000184481	FOXO4	forkhead box O4 [Source:HGNC Symbol;Acc:7139]	-0.902835	2.3907	15.7008	7.41935e-05	0.00142507
ENSG00000150540	HNMT	histamine N-methyltransferase [Source:HGNC Symbol;Acc:5028]	-0.528722	3.60372	15.6894	7.46425e-05	0.00143184
ENSG00000159592	GPBP1L1	GC-rich promoter binding protein 1-like 1 [Source:HGNC Symbol;Acc:28843]	-0.291882	6.54878	15.6439	7.64607e-05	0.00146482
ENSG00000163394	CCKAR	cholecystokinin A receptor [Source:HGNC Symbol;Acc:1570]	-0.67294	2.31504	15.6386	7.6673e-05	0.00146699
ENSG00000160801	PTH1R	parathyroid hormone 1 receptor [Source:HGNC Symbol;Acc:9608]	-0.780099	1.85095	15.6353	7.68081e-05	0.00146768
ENSG00000104907	TRMT1	tRNA methyltransferase 1 homolog (S. cerevisiae) [Source:HGNC Symbol;Acc:25980]	0.365111	6.22501	15.6136	7.76945e-05	0.0014827
ENSG00000122786	CALD1	caldesmon 1 [Source:HGNC Symbol;Acc:1441]	-0.239398	7.88866	15.6023	7.81588e-05	0.00148964
ENSG00000070540	WIPI1	WD repeat domain, phosphoinositide interacting 1 [Source:HGNC Symbol;Acc:25471]	-0.585302	2.96943	15.581	7.90461e-05	0.00150462
ENSG00000255135	RP11-111M22.3		0.77376	2.0588	15.5635	7.97805e-05	0.00151665
ENSG00000145335	SNCA	synuclein, alpha (non A4 component of amyloid precursor) [Source:HGNC Symbol;Acc:11138]	0.678507	3.35808	15.5544	8.01661e-05	0.00152202
ENSG00000197622	CDC42SE1	CDC42 small effector 1 [Source:HGNC Symbol;Acc:17719]	0.232236	8.18194	15.551	8.03094e-05	0.00152279
ENSG00000166147	FBN1	fibrillin 1 [Source:HGNC Symbol;Acc:3603]	-0.944067	1.57638	15.5393	8.08075e-05	0.00153028
ENSG00000122507	BBS9	Bardet-Biedl syndrome 9 [Source:HGNC Symbol;Acc:30000]	-0.53931	3.59323	15.5286	8.1265e-05	0.00153698
ENSG00000166166	TRMT61A	tRNA methyltransferase 61 homolog A (S. cerevisiae) [Source:HGNC Symbol;Acc:23790]	0.603597	3.50866	15.5241	8.14592e-05	0.00153869
ENSG00000160469	BRSK1	BR serine/threonine kinase 1 [Source:HGNC Symbol;Acc:18994]	0.481614	4.97461	15.5124	8.1965e-05	0.00154519
ENSG00000166402	TUB	tubby homolog (mouse) [Source:HGNC Symbol;Acc:12406]	0.231284	7.67795	15.5101	8.20673e-05	0.00154519
ENSG00000218426	RP11-475C16.1		0.393853	5.24713	15.5089	8.21164e-05	0.00154519
ENSG00000156475	PPP2R2B	protein phosphatase 2, regulatory subunit B, beta [Source:HGNC Symbol;Acc:9305]	0.487834	3.93099	15.487	8.3075e-05	0.00156124
ENSG00000004478	FKBP4	FK506 binding protein 4, 59kDa [Source:HGNC Symbol;Acc:3720]	0.258938	8.06507	15.4777	8.34848e-05	0.00156695
ENSG00000069275	NUCKS1	nuclear casein kinase and cyclin-dependent kinase substrate 1 [Source:HGNC Symbol;Acc:29923]	-0.221083	10.3422	15.4748	8.36141e-05	0.00156739
ENSG00000088854	C20orf194	chromosome 20 open reading frame 194 [Source:HGNC Symbol;Acc:17721]	-0.412331	4.91477	15.4678	8.39219e-05	0.00157117
ENSG00000186185	KIF18B	kinesin family member 18B [Source:HGNC Symbol;Acc:27102]	0.401724	5.66223	15.4598	8.42778e-05	0.00157585
ENSG00000144668	ITGA9	integrin, alpha 9 [Source:HGNC Symbol;Acc:6145]	-0.629017	3.03823	15.4305	8.55954e-05	0.00159847
ENSG00000105968	H2AFV	H2A histone family, member V [Source:HGNC Symbol;Acc:20664]	-0.255291	7.50979	15.4267	8.57695e-05	0.0015997
ENSG00000127946	HIP1	huntingtin interacting protein 1 [Source:HGNC Symbol;Acc:4913]	-0.301149	6.10097	15.4124	8.64172e-05	0.00160975
ENSG00000163939	PBRM1	polybromo 1 [Source:HGNC Symbol;Acc:30064]	-0.231919	7.86748	15.4063	8.66993e-05	0.00161298
ENSG00000138131	LOXL4	lysyl oxidase-like 4 [Source:HGNC Symbol;Acc:17171]	-0.615861	3.18484	15.3953	8.7203e-05	0.00162031
ENSG00000125354	SEPT6	septin 6 [Source:HGNC Symbol;Acc:15848]	-0.324591	5.76188	15.3921	8.73539e-05	0.00162108
ENSG00000135046	ANXA1	annexin A1 [Source:HGNC Symbol;Acc:533]	6.9093	-1.10269	15.389	8.74949e-05	0.00162167
ENSG00000054983	GALC	galactosylceramidase [Source:HGNC Symbol;Acc:4115]	-0.3851	4.95562	15.367	8.85207e-05	0.00163863
ENSG00000133703	KRAS	v-Ki-ras2 Kirsten rat sarcoma viral oncogene homolog [Source:HGNC Symbol;Acc:6407]	-0.270113	7.08464	15.3504	8.93029e-05	0.00165104
ENSG00000156508	EEF1A1	eukaryotic translation elongation factor 1 alpha 1 [Source:HGNC Symbol;Acc:3189]	0.17092	12.3332	15.3173	9.08814e-05	0.00167813
ENSG00000217930	PAM16	presequence translocase-associated motor 16 homolog (S. cerevisiae) [Source:HGNC Symbol;Acc:29679]	0.584141	3.7987	15.3058	9.14339e-05	0.00168574
ENSG00000080345	RIF1	RAP1 interacting factor homolog (yeast) [Source:HGNC Symbol;Acc:23207]	-0.231513	7.70423	15.304	9.1521e-05	0.00168574
ENSG00000169432	SCN9A	sodium channel, voltage-gated, type IX, alpha subunit [Source:HGNC Symbol;Acc:10597]	1.1689	1.35211	15.2977	9.18261e-05	0.00168926
ENSG00000101343	CRNKL1	crooked neck pre-mRNA splicing factor-like 1 (Drosophila) [Source:HGNC Symbol;Acc:15762]	-0.279325	6.2843	15.2582	9.37706e-05	0.00172289
ENSG00000132716	DCAF8	DDB1 and CUL4 associated factor 8 [Source:HGNC Symbol;Acc:24891]	-0.237687	7.58703	15.2519	9.40811e-05	0.00172645
ENSG00000181513	ACBD4	acyl-CoA binding domain containing 4 [Source:HGNC Symbol;Acc:23337]	-1.31774	-0.00417393	15.245	9.44278e-05	0.00173067
ENSG00000158850	B4GALT3	UDP-Gal:betaGlcNAc beta 1,4- galactosyltransferase, polypeptide 3 [Source:HGNC Symbol;Acc:926]	0.323717	6.22177	15.228	9.52816e-05	0.00174416
ENSG00000148337	CIZ1	CDKN1A interacting zinc finger protein 1 [Source:HGNC Symbol;Acc:16744]	0.324976	6.80445	15.2039	9.65043e-05	0.00176436
ENSG00000175911	AC127496.1	Uncharacterized protein [Source:UniProtKB/TrEMBL;Acc:Q9HBN7]	0.852177	2.06508	15.2005	9.66776e-05	0.00176535
ENSG00000141449	GREB1L	growth regulation by estrogen in breast cancer-like [Source:HGNC Symbol;Acc:31042]	-0.263079	6.60581	15.1744	9.80225e-05	0.00178607
ENSG00000115461	IGFBP5	insulin-like growth factor binding protein 5 [Source:HGNC Symbol;Acc:5474]	-0.247577	7.23625	15.1738	9.80535e-05	0.00178607
ENSG00000172115	CYCS	cytochrome c, somatic [Source:HGNC Symbol;Acc:19986]	0.238479	8.7745	15.1664	9.84382e-05	0.00179087
ENSG00000185650	ZFP36L1	zinc finger protein 36, C3H type-like 1 [Source:HGNC Symbol;Acc:1107]	-0.327801	5.71213	15.1395	9.98503e-05	0.00181433
ENSG00000260032	LINC00657	long intergenic non-protein coding RNA 657 [Source:HGNC Symbol;Acc:44311]	-0.221277	9.35648	15.1312	0.000100293	0.00182014
ENSG00000100304	TTLL12	tubulin tyrosine ligase-like family, member 12 [Source:HGNC Symbol;Acc:28974]	0.369159	6.01634	15.1122	0.000101306	0.00183629
ENSG00000108298	RPL19	ribosomal protein L19 [Source:HGNC Symbol;Acc:10312]	0.224161	9.16323	15.0988	0.000102026	0.00184667
ENSG00000168214	RBPJ	recombination signal binding protein for immunoglobulin kappa J region [Source:HGNC Symbol;Acc:5724]	-0.231664	7.84264	15.0969	0.000102128	0.00184667
ENSG00000163673	DCLK3	doublecortin-like kinase 3 [Source:HGNC Symbol;Acc:19005]	-0.54923	3.14212	15.0834	0.000102862	0.00185765
ENSG00000169925	BRD3	bromodomain containing 3 [Source:HGNC Symbol;Acc:1104]	-0.319751	6.01753	15.0804	0.000103028	0.00185776
ENSG00000136295	TTYH3	tweety homolog 3 (Drosophila) [Source:HGNC Symbol;Acc:22222]	0.361528	6.54204	15.0787	0.000103118	0.00185776
ENSG00000180773	SLC36A4	solute carrier family 36 (proton/amino acid symporter), member 4 [Source:HGNC Symbol;Acc:19660]	-0.313104	6.05208	15.0588	0.000104213	0.0018752
ENSG00000233276	GPX1	glutathione peroxidase 1 [Source:HGNC Symbol;Acc:4553]	0.405042	5.70445	15.0455	0.000104948	0.00188613
ENSG00000115738	ID2	inhibitor of DNA binding 2, dominant negative helix-loop-helix protein [Source:HGNC Symbol;Acc:5361]	-0.257511	7.00751	15.0376	0.000105388	0.00189174
ENSG00000096384	HSP90AB1	heat shock protein 90kDa alpha (cytosolic), class B member 1 [Source:HGNC Symbol;Acc:5258]	0.19513	11.2928	15.0346	0.000105556	0.00189246
ENSG00000175820	CCDC168	coiled-coil domain containing 168 [Source:HGNC Symbol;Acc:26851]	1.28059	0.542775	15.0249	0.000106102	0.00189996
ENSG00000029363	BCLAF1	BCL2-associated transcription factor 1 [Source:HGNC Symbol;Acc:16863]	-0.213277	9.18557	14.9621	0.000109694	0.00195975
ENSG00000130635	COL5A1	collagen, type V, alpha 1 [Source:HGNC Symbol;Acc:2209]	-0.383893	5.54493	14.9619	0.000109706	0.00195975
ENSG00000090273	NUDC	nuclear distribution C homolog (A. nidulans) [Source:HGNC Symbol;Acc:8045]	0.27837	6.9395	14.9575	0.00010996	0.00196192
ENSG00000108654	DDX5	DEAD (Asp-Glu-Ala-Asp) box helicase 5 [Source:HGNC Symbol;Acc:2746]	-0.190421	10.7434	14.9409	0.000110933	0.0019769
ENSG00000139289	PHLDA1	pleckstrin homology-like domain, family A, member 1 [Source:HGNC Symbol;Acc:8933]	0.420546	5.01335	14.9265	0.000111783	0.00198803
ENSG00000068697	LAPTM4A	lysosomal protein transmembrane 4 alpha [Source:HGNC Symbol;Acc:6924]	-0.245124	7.29887	14.9258	0.000111826	0.00198803
ENSG00000172572	PDE3A	phosphodiesterase 3A, cGMP-inhibited [Source:HGNC Symbol;Acc:8778]	-0.438964	4.30138	14.9214	0.000112084	0.00198836
ENSG00000147955	SIGMAR1	sigma non-opioid intracellular receptor 1 [Source:HGNC Symbol;Acc:8157]	0.289151	6.3234	14.9209	0.000112113	0.00198836
ENSG00000140538	NTRK3	neurotrophic tyrosine kinase, receptor, type 3 [Source:HGNC Symbol;Acc:8033]	-0.911901	1.3953	14.9072	0.00011293	0.00200046
ENSG00000167964	RAB26	RAB26, member RAS oncogene family [Source:HGNC Symbol;Acc:14259]	-0.841175	1.40428	14.8971	0.00011354	0.00200796
ENSG00000128228	SDF2L1	stromal cell-derived factor 2-like 1 [Source:HGNC Symbol;Acc:10676]	0.630674	3.14059	14.8956	0.000113625	0.00200796
ENSG00000231721	AC058791.2		-0.692109	2.51398	14.8832	0.000114376	0.00201883
ENSG00000117632	STMN1	stathmin 1 [Source:HGNC Symbol;Acc:6510]	-0.216265	10.5046	14.8796	0.000114593	0.00202025
ENSG00000185624	P4HB	prolyl 4-hydroxylase, beta polypeptide [Source:HGNC Symbol;Acc:8548]	0.255836	8.58526	14.8652	0.000115476	0.0020334
ENSG00000160877	NACC1	nucleus accumbens associated 1, BEN and BTB (POZ) domain containing [Source:HGNC Symbol;Acc:20967]	0.396283	5.53312	14.8592	0.000115843	0.00203625
ENSG00000136044	APPL2	adaptor protein, phosphotyrosine interaction, PH domain and leucine zipper containing 2 [Source:HGNC Symbol;Acc:18242]	-0.333703	5.78588	14.858	0.000115913	0.00203625
ENSG00000148248	SURF4	surfeit 4 [Source:HGNC Symbol;Acc:11476]	0.244393	7.30413	14.8075	0.000119064	0.00208895
ENSG00000107281	NPDC1	neural proliferation, differentiation and control, 1 [Source:HGNC Symbol;Acc:7899]	0.532074	4.45032	14.8054	0.000119195	0.00208895
ENSG00000187051	RPS19BP1	ribosomal protein S19 binding protein 1 [Source:HGNC Symbol;Acc:28749]	0.402562	5.30396	14.7991	0.00011959	0.00209339
ENSG00000231991	ANXA2P2	annexin A2 pseudogene 2 [Source:HGNC Symbol;Acc:539]	-0.312247	5.67006	14.7934	0.000119952	0.00209724
ENSG00000176049	JAKMIP2	janus kinase and microtubule interacting protein 2 [Source:HGNC Symbol;Acc:29067]	-0.442911	4.17266	14.7895	0.000120205	0.0020992
ENSG00000117707	PROX1	prospero homeobox 1 [Source:HGNC Symbol;Acc:9459]	-0.275608	6.59445	14.7842	0.00012054	0.0021002
ENSG00000138018	EPT1	ethanolaminephosphotransferase 1 (CDP-ethanolamine-specific) [Source:HGNC Symbol;Acc:29361]	0.242285	7.39353	14.7841	0.000120546	0.0021002
ENSG00000106049	HIBADH	3-hydroxyisobutyrate dehydrogenase [Source:HGNC Symbol;Acc:4907]	-0.421772	4.4724	14.7415	0.000123302	0.00214569
ENSG00000107669	ATE1	arginyltransferase 1 [Source:HGNC Symbol;Acc:782]	-0.342872	5.4248	14.7368	0.000123607	0.00214847
ENSG00000027644	INSRR	insulin receptor-related receptor [Source:HGNC Symbol;Acc:6093]	-0.559865	3.2083	14.7293	0.000124106	0.00215461
ENSG00000198900	TOP1	topoisomerase (DNA) I [Source:HGNC Symbol;Acc:11986]	0.209134	8.79534	14.7154	0.00012502	0.00216549
ENSG00000127540	UQCR11	ubiquinol-cytochrome c reductase, complex III subunit XI [Source:HGNC Symbol;Acc:30862]	0.308385	5.82706	14.7153	0.000125025	0.00216549
ENSG00000013374	NUB1	negative regulator of ubiquitin-like proteins 1 [Source:HGNC Symbol;Acc:17623]	-0.307727	5.79216	14.7127	0.000125199	0.00216552
ENSG00000169689	STRA13	stimulated by retinoic acid 13 homolog (mouse) [Source:HGNC Symbol;Acc:11422]	0.455274	4.93572	14.7109	0.000125319	0.00216552
ENSG00000072274	TFRC	transferrin receptor (p90, CD71) [Source:HGNC Symbol;Acc:11763]	0.213737	9.59842	14.7068	0.00012559	0.00216767
ENSG00000162231	NXF1	nuclear RNA export factor 1 [Source:HGNC Symbol;Acc:8071]	0.272153	6.98631	14.669	0.000128134	0.002209
ENSG00000149926	FAM57B	family with sequence similarity 57, member B [Source:HGNC Symbol;Acc:25295]	0.510589	4.67849	14.657	0.000128957	0.00222061
ENSG00000128881	TTBK2	tau tubulin kinase 2 [Source:HGNC Symbol;Acc:19141]	-0.293005	6.13007	14.6313	0.000130724	0.00224843
ENSG00000139880	CDH24	cadherin 24, type 2 [Source:HGNC Symbol;Acc:14265]	0.390924	5.10153	14.6248	0.000131175	0.00225356
ENSG00000184967	NOC4L	nucleolar complex associated 4 homolog (S. cerevisiae) [Source:HGNC Symbol;Acc:28461]	0.56025	3.88046	14.6143	0.000131913	0.0022627
ENSG00000111664	GNB3	guanine nucleotide binding protein (G protein), beta polypeptide 3 [Source:HGNC Symbol;Acc:4400]	0.748678	2.33743	14.6128	0.000132012	0.0022627
ENSG00000122359	ANXA11	annexin A11 [Source:HGNC Symbol;Acc:535]	-0.461511	4.02529	14.6009	0.000132854	0.0022745
ENSG00000150594	ADRA2A	adrenoceptor alpha 2A [Source:HGNC Symbol;Acc:281]	-0.486302	3.65664	14.5835	0.00013408	0.00229283
ENSG00000108107	RPL28	ribosomal protein L28 [Source:HGNC Symbol;Acc:10330]	0.327777	7.68735	14.5668	0.00013528	0.00231068
ENSG00000162624	LHX8	LIM homeobox 8 [Source:HGNC Symbol;Acc:28838]	-0.819422	1.95061	14.5484	0.000136606	0.00233064
ENSG00000101361	NOP56	NOP56 ribonucleoprotein homolog (yeast) [Source:HGNC Symbol;Acc:15911]	0.220945	8.37898	14.5196	0.000138706	0.00236374
ENSG00000087245	MMP2	matrix metallopeptidase 2 (gelatinase A, 72kDa gelatinase, 72kDa type IV collagenase) [Source:HGNC Symbol;Acc:7166]	-0.402505	4.9776	14.5135	0.000139162	0.00236879
ENSG00000113594	LIFR	leukemia inhibitory factor receptor alpha [Source:HGNC Symbol;Acc:6597]	-0.258423	6.88855	14.5039	0.000139872	0.00237815
ENSG00000117069	ST6GALNAC5	ST6 (alpha-N-acetyl-neuraminyl-2,3-beta-galactosyl-1,3)-N-acetylgalactosaminide alpha-2,6-sialyltransferase 5 [Source:HGNC Symbol;Acc:19342]	-0.32336	5.46824	14.4757	0.000141979	0.00241121
ENSG00000180929	GPR62	G protein-coupled receptor 62 [Source:HGNC Symbol;Acc:13301]	2.21516	-0.197133	14.4723	0.000142235	0.00241279
ENSG00000211455	STK38L	serine/threonine kinase 38 like [Source:HGNC Symbol;Acc:17848]	-0.3456	5.64898	14.4663	0.000142689	0.00241771
ENSG00000114120	SLC25A36	solute carrier family 25 (pyrimidine nucleotide carrier ), member 36 [Source:HGNC Symbol;Acc:25554]	-0.252206	7.68919	14.4608	0.000143105	0.002422
ENSG00000251095	RP11-115D19.1		0.942839	2.7756	14.4514	0.000143822	0.00243134
ENSG00000137642	SORL1	sortilin-related receptor, L(DLR class) A repeats containing [Source:HGNC Symbol;Acc:11185]	-0.576637	3.15438	14.43	0.000145466	0.00245633
ENSG00000149972	CNTN5	contactin 5 [Source:HGNC Symbol;Acc:2175]	-0.397506	4.85155	14.4	0.000147805	0.00249299
ENSG00000112541	PDE10A	phosphodiesterase 10A [Source:HGNC Symbol;Acc:8772]	-0.712821	2.33348	14.3949	0.000148202	0.00249429
ENSG00000112576	CCND3	cyclin D3 [Source:HGNC Symbol;Acc:1585]	0.438134	4.2864	14.3947	0.000148219	0.00249429
ENSG00000165434	PGM2L1	phosphoglucomutase 2-like 1 [Source:HGNC Symbol;Acc:20898]	-0.420451	4.37203	14.3877	0.000148771	0.00250074
ENSG00000160058	BSDC1	BSD domain containing 1 [Source:HGNC Symbol;Acc:25501]	-0.29848	6.19182	14.3786	0.000149495	0.00251005
ENSG00000165983	PTER	phosphotriesterase related [Source:HGNC Symbol;Acc:9590]	-0.708527	2.63191	14.3687	0.000150282	0.00252042
ENSG00000186951	PPARA	peroxisome proliferator-activated receptor alpha [Source:HGNC Symbol;Acc:9232]	-0.436545	4.26424	14.3472	0.000152004	0.00254642
ENSG00000155034	FBXL18	F-box and leucine-rich repeat protein 18 [Source:HGNC Symbol;Acc:21874]	0.641531	3.24013	14.3368	0.000152847	0.00255764
ENSG00000099954	CECR2	cat eye syndrome chromosome region, candidate 2 [Source:HGNC Symbol;Acc:1840]	-0.347377	5.19462	14.3278	0.000153582	0.00256704
ENSG00000144847	IGSF11	immunoglobulin superfamily, member 11 [Source:HGNC Symbol;Acc:16669]	-0.275054	6.4103	14.3116	0.000154911	0.00258634
ENSG00000157077	ZFYVE9	zinc finger, FYVE domain containing 9 [Source:HGNC Symbol;Acc:6775]	-0.260594	6.46251	14.3018	0.000155716	0.00259684
ENSG00000103326	SOLH	small optic lobes homolog (Drosophila) [Source:HGNC Symbol;Acc:11182]	0.495148	4.85883	14.2653	0.000158766	0.00264473
ENSG00000206417	H1FX-AS1	H1FX antisense RNA 1 [Source:HGNC Symbol;Acc:27953]	-1.51694	-0.030968	14.2469	0.000160324	0.00266769
ENSG00000187479	C11orf96	chromosome 11 open reading frame 96 [Source:HGNC Symbol;Acc:38675]	-0.991001	0.960207	14.2352	0.000161329	0.00268139
ENSG00000166557	TMED3	transmembrane emp24 protein transport domain containing 3 [Source:HGNC Symbol;Acc:28889]	0.302224	6.01873	14.2291	0.000161852	0.00268686
ENSG00000128923	FAM63B	family with sequence similarity 63, member B [Source:HGNC Symbol;Acc:26954]	-0.304419	5.93908	14.225	0.0001622	0.00268686
ENSG00000180198	RCC1	regulator of chromosome condensation 1 [Source:HGNC Symbol;Acc:1913]	0.283118	6.89498	14.225	0.000162202	0.00268686
ENSG00000139970	RTN1	reticulon 1 [Source:HGNC Symbol;Acc:10467]	-0.327836	5.49059	14.2083	0.000163644	0.00270771
ENSG00000171163	ZNF692	zinc finger protein 692 [Source:HGNC Symbol;Acc:26049]	0.413899	5.3479	14.2042	0.000164005	0.00271065
ENSG00000198121	LPAR1	lysophosphatidic acid receptor 1 [Source:HGNC Symbol;Acc:3166]	-0.375875	4.73609	14.1999	0.000164377	0.00271377
ENSG00000104142	VPS18	vacuolar protein sorting 18 homolog (S. cerevisiae) [Source:HGNC Symbol;Acc:15972]	0.421024	4.88676	14.1942	0.000164875	0.00271897
ENSG00000136271	DDX56	DEAD (Asp-Glu-Ala-Asp) box helicase 56 [Source:HGNC Symbol;Acc:18193]	0.257852	6.79172	14.1688	0.00016712	0.00275293
ENSG00000167747	C19orf48	chromosome 19 open reading frame 48 [Source:HGNC Symbol;Acc:29667]	0.365847	5.72926	14.1558	0.000168278	0.00276892
ENSG00000108788	MLX	MAX-like protein X [Source:HGNC Symbol;Acc:11645]	0.27714	6.57181	14.1487	0.00016891	0.00277623
ENSG00000131263	RLIM	ring finger protein, LIM domain interacting [Source:HGNC Symbol;Acc:13429]	-0.235076	7.86617	14.1345	0.000170192	0.00279421
ENSG00000176845	METRNL	meteorin, glial cell differentiation regulator-like [Source:HGNC Symbol;Acc:27584]	0.852023	1.75402	14.1262	0.000170944	0.00280344
ENSG00000071794	HLTF	helicase-like transcription factor [Source:HGNC Symbol;Acc:11099]	-0.263535	6.54484	14.0999	0.000173356	0.00283986
ENSG00000135912	TTLL4	tubulin tyrosine ligase-like family, member 4 [Source:HGNC Symbol;Acc:28976]	0.326082	5.84265	14.0938	0.000173916	0.00284588
ENSG00000055483	USP36	ubiquitin specific peptidase 36 [Source:HGNC Symbol;Acc:20062]	0.291361	6.6124	14.0728	0.000175867	0.00287463
ENSG00000005882	PDK2	pyruvate dehydrogenase kinase, isozyme 2 [Source:HGNC Symbol;Acc:8810]	-0.63614	3.33991	14.0618	0.000176896	0.00288648
ENSG00000229589	ACVR2B-AS1	ACVR2B antisense RNA 1 [Source:HGNC Symbol;Acc:44161]	-0.925397	1.00337	14.0609	0.000176982	0.00288648
ENSG00000116754	SRSF11	serine/arginine-rich splicing factor 11 [Source:HGNC Symbol;Acc:10782]	-0.211963	9.5171	14.0357	0.000179369	0.00291998
ENSG00000180447	GAS1	growth arrest-specific 1 [Source:HGNC Symbol;Acc:4165]	-0.624019	2.83577	14.0351	0.00017943	0.00291998
ENSG00000137693	YAP1	Yes-associated protein 1 [Source:HGNC Symbol;Acc:16262]	-0.310456	5.64012	14.0205	0.000180831	0.00293955
ENSG00000071967	CYBRD1	cytochrome b reductase 1 [Source:HGNC Symbol;Acc:20797]	-0.491473	3.49725	14.0083	0.000182007	0.00295542
ENSG00000139318	DUSP6	dual specificity phosphatase 6 [Source:HGNC Symbol;Acc:3072]	-0.67543	2.40896	13.9638	0.000186363	0.00302284
ENSG00000197852	FAM212B	family with sequence similarity 212, member B [Source:HGNC Symbol;Acc:28045]	0.261741	7.12016	13.9589	0.000186854	0.00302748
ENSG00000153250	RBMS1	RNA binding motif, single stranded interacting protein 1 [Source:HGNC Symbol;Acc:9907]	-0.284222	6.27768	13.951	0.000187639	0.00303687
ENSG00000134324	LPIN1	lipin 1 [Source:HGNC Symbol;Acc:13345]	-0.290835	6.04505	13.9461	0.000188126	0.00304144
ENSG00000187231	SESTD1	SEC14 and spectrin domains 1 [Source:HGNC Symbol;Acc:18379]	-0.348155	5.17184	13.9359	0.000189156	0.00305476
ENSG00000143379	SETDB1	SET domain, bifurcated 1 [Source:HGNC Symbol;Acc:10761]	-0.225222	7.58365	13.9285	0.000189896	0.00306337
ENSG00000127152	BCL11B	B-cell CLL/lymphoma 11B (zinc finger protein) [Source:HGNC Symbol;Acc:13222]	-0.325001	5.60786	13.9204	0.000190721	0.00307332
ENSG00000142197	DOPEY2	dopey family member 2 [Source:HGNC Symbol;Acc:1291]	-0.487644	3.57869	13.9073	0.000192055	0.00309146
ENSG00000150457	LATS2	LATS, large tumor suppressor, homolog 2 (Drosophila) [Source:HGNC Symbol;Acc:6515]	-0.574513	3.63426	13.8979	0.000193018	0.00310358
ENSG00000164674	SYTL3	synaptotagmin-like 3 [Source:HGNC Symbol;Acc:15587]	-0.485867	3.6108	13.8687	0.000196033	0.00314864
ENSG00000177519	RPRM	reprimo, TP53 dependent G2 arrest mediator candidate [Source:HGNC Symbol;Acc:24201]	0.931455	2.62926	13.859	0.000197047	0.00315838
ENSG00000171262	FAM98B	family with sequence similarity 98, member B [Source:HGNC Symbol;Acc:26773]	-0.274756	6.9826	13.8589	0.000197065	0.00315838
ENSG00000138778	CENPE	centromere protein E, 312kDa [Source:HGNC Symbol;Acc:1856]	0.268016	7.79597	13.856	0.000197364	0.00315974
ENSG00000133863	TEX15	testis expressed 15 [Source:HGNC Symbol;Acc:11738]	0.257164	6.42207	13.8391	0.000199145	0.00318481
ENSG00000104825	NFKBIB	nuclear factor of kappa light polypeptide gene enhancer in B-cells inhibitor, beta [Source:HGNC Symbol;Acc:7798]	0.530741	3.86803	13.8329	0.000199807	0.00319195
ENSG00000142937	RPS8	ribosomal protein S8 [Source:HGNC Symbol;Acc:10441]	0.202782	9.51646	13.8232	0.000200843	0.00320505
ENSG00000091542	ALKBH5	alkB, alkylation repair homolog 5 (E. coli) [Source:HGNC Symbol;Acc:25996]	0.292918	6.34215	13.8037	0.000202931	0.00323489
ENSG00000100416	TRMU	tRNA 5-methylaminomethyl-2-thiouridylate methyltransferase [Source:HGNC Symbol;Acc:25481]	0.331868	5.69687	13.7782	0.000205707	0.00327561
ENSG00000197093	GAL3ST4	galactose-3-O-sulfotransferase 4 [Source:HGNC Symbol;Acc:24145]	0.577017	3.72456	13.755	0.00020827	0.00331286
ENSG00000154822	PLCL2	phospholipase C-like 2 [Source:HGNC Symbol;Acc:9064]	-0.407342	4.49286	13.7528	0.000208511	0.00331314
ENSG00000089693	MLF2	myeloid leukemia factor 2 [Source:HGNC Symbol;Acc:7126]	0.274465	6.63421	13.7309	0.000210955	0.00334838
ENSG00000103423	DNAJA3	DnaJ (Hsp40) homolog, subfamily A, member 3 [Source:HGNC Symbol;Acc:11808]	0.280046	6.33006	13.7243	0.000211701	0.00335662
ENSG00000116641	DOCK7	dedicator of cytokinesis 7 [Source:HGNC Symbol;Acc:19190]	-0.234278	7.42671	13.715	0.000212749	0.00336963
ENSG00000225573	RPL35P5	ribosomal protein L35 pseudogene 5 [Source:HGNC Symbol;Acc:36955]	0.512187	3.53378	13.7028	0.00021414	0.00338803
ENSG00000177606	JUN	jun proto-oncogene [Source:HGNC Symbol;Acc:6204]	0.381611	5.5013	13.6729	0.000217574	0.00343869
ENSG00000175040	CHST2	carbohydrate (N-acetylglucosamine-6-O) sulfotransferase 2 [Source:HGNC Symbol;Acc:1970]	-0.313479	6.24191	13.666	0.000218374	0.00344765
ENSG00000076770	MBNL3	muscleblind-like splicing regulator 3 [Source:HGNC Symbol;Acc:20564]	-0.388278	4.99239	13.6599	0.000219087	0.00345523
ENSG00000177707	PVRL3	poliovirus receptor-related 3 [Source:HGNC Symbol;Acc:17664]	-0.260278	6.37854	13.6515	0.00022006	0.00346688
ENSG00000141562	NARF	nuclear prelamin A recognition factor [Source:HGNC Symbol;Acc:29916]	-0.274207	6.48155	13.6346	0.000222056	0.0034946
ENSG00000112759	SLC29A1	solute carrier family 29 (nucleoside transporters), member 1 [Source:HGNC Symbol;Acc:11003]	0.328105	5.49006	13.6136	0.000224553	0.00352796
ENSG00000172009	THOP1	thimet oligopeptidase 1 [Source:HGNC Symbol;Acc:11793]	0.427194	5.51174	13.6128	0.000224652	0.00352796
ENSG00000115421	PAPOLG	poly(A) polymerase gamma [Source:HGNC Symbol;Acc:14982]	-0.311146	5.71723	13.6102	0.000224961	0.00352908
ENSG00000179218	CALR	calreticulin [Source:HGNC Symbol;Acc:1455]	0.256629	8.74339	13.603	0.00022582	0.00353674
ENSG00000198815	FOXJ3	forkhead box J3 [Source:HGNC Symbol;Acc:29178]	-0.230248	7.311	13.6021	0.000225927	0.00353674
ENSG00000165813	C10orf118	chromosome 10 open reading frame 118 [Source:HGNC Symbol;Acc:24349]	-0.471212	4.06337	13.5971	0.000226534	0.00354249
ENSG00000148303	RPL7A	ribosomal protein L7a [Source:HGNC Symbol;Acc:10364]	0.208272	9.76378	13.5901	0.000227376	0.00355147
ENSG00000156471	PTDSS1	phosphatidylserine synthase 1 [Source:HGNC Symbol;Acc:9587]	0.24484	6.85015	13.5884	0.000227588	0.00355147
ENSG00000127483	HP1BP3	heterochromatin protein 1, binding protein 3 [Source:HGNC Symbol;Acc:24973]	-0.232682	7.16836	13.5723	0.000229553	0.00357837
ENSG00000261762	RP11-650L12.2		-0.503485	3.89665	13.5582	0.000231284	0.00360156
ENSG00000168036	CTNNB1	catenin (cadherin-associated protein), beta 1, 88kDa [Source:HGNC Symbol;Acc:2514]	-0.194015	9.19398	13.54	0.000233527	0.00363266
ENSG00000124098	FAM210B	family with sequence similarity 210, member B [Source:HGNC Symbol;Acc:16102]	-0.43565	4.06456	13.5338	0.000234304	0.00364094
ENSG00000110090	CPT1A	carnitine palmitoyltransferase 1A (liver) [Source:HGNC Symbol;Acc:2328]	-0.308464	5.61081	13.5303	0.000234745	0.00364396
ENSG00000137075	RNF38	ring finger protein 38 [Source:HGNC Symbol;Acc:18052]	-0.255786	6.77099	13.5133	0.00023688	0.00367326
ENSG00000198075	SULT1C4	sulfotransferase family, cytosolic, 1C, member 4 [Source:HGNC Symbol;Acc:11457]	-0.342891	5.58643	13.4919	0.000239601	0.00371156
ENSG00000224631	RP11-51O6.1		0.228932	7.18253	13.4884	0.000240049	0.00371461
ENSG00000106484	MEST	mesoderm specific transcript homolog (mouse) [Source:HGNC Symbol;Acc:7028]	0.261995	6.95205	13.4835	0.000240664	0.00372025
ENSG00000150093	ITGB1	integrin, beta 1 (fibronectin receptor, beta polypeptide, antigen CD29 includes MDF2, MSK12) [Source:HGNC Symbol;Acc:6153]	-0.203308	9.2055	13.4698	0.000242434	0.00374017
ENSG00000132437	DDC	dopa decarboxylase (aromatic L-amino acid decarboxylase) [Source:HGNC Symbol;Acc:2719]	-1.75122	-1.12462	13.4696	0.000242458	0.00374017
ENSG00000105737	GRIK5	glutamate receptor, ionotropic, kainate 5 [Source:HGNC Symbol;Acc:4583]	-0.858692	1.65375	13.4625	0.000243383	0.00375053
ENSG00000225733	FGD5-AS1	FGD5 antisense RNA 1 [Source:HGNC Symbol;Acc:40410]	-0.219283	7.756	13.4489	0.000245151	0.00377385
ENSG00000198431	TXNRD1	thioredoxin reductase 1 [Source:HGNC Symbol;Acc:12437]	-0.19501	8.97902	13.4431	0.000245912	0.00377973
ENSG00000144713	RPL32	ribosomal protein L32 [Source:HGNC Symbol;Acc:10336]	0.199645	9.48865	13.4421	0.000246044	0.00377973
ENSG00000182463	TSHZ2	teashirt zinc finger homeobox 2 [Source:HGNC Symbol;Acc:13010]	-0.57522	2.99733	13.4309	0.000247509	0.0037983
ENSG00000116062	MSH6	mutS homolog 6 (E. coli) [Source:HGNC Symbol;Acc:7329]	-0.23469	7.72393	13.3909	0.000252849	0.00387623
ENSG00000184009	ACTG1	actin, gamma 1 [Source:HGNC Symbol;Acc:144]	0.195884	11.8606	13.3882	0.00025321	0.00387776
ENSG00000144579	CTDSP1	CTD (carboxy-terminal domain, RNA polymerase II, polypeptide A) small phosphatase 1 [Source:HGNC Symbol;Acc:21614]	-0.50745	3.9651	13.3809	0.000254198	0.00388866
ENSG00000104886	PLEKHJ1	pleckstrin homology domain containing, family J member 1 [Source:HGNC Symbol;Acc:18211]	0.380134	5.01359	13.3791	0.000254447	0.00388866
ENSG00000145147	SLIT2	slit homolog 2 (Drosophila) [Source:HGNC Symbol;Acc:11086]	-0.432333	4.25735	13.3705	0.000255609	0.00389939
ENSG00000166033	HTRA1	HtrA serine peptidase 1 [Source:HGNC Symbol;Acc:9476]	-0.553886	3.1344	13.37	0.000255676	0.00389939
ENSG00000198056	PRIM1	primase, DNA, polypeptide 1 (49kDa) [Source:HGNC Symbol;Acc:9369]	-0.341581	5.42394	13.3632	0.000256614	0.00390966
ENSG00000131558	EXOC4	exocyst complex component 4 [Source:HGNC Symbol;Acc:30389]	-0.258978	6.39344	13.3596	0.000257108	0.00391317
ENSG00000172020	GAP43	growth associated protein 43 [Source:HGNC Symbol;Acc:4140]	1.10248	0.922959	13.3486	0.000258622	0.00393217
ENSG00000170775	GPR37	G protein-coupled receptor 37 (endothelin receptor type B-like) [Source:HGNC Symbol;Acc:4494]	1.17804	0.67915	13.3449	0.000259122	0.00393341
ENSG00000116455	WDR77	WD repeat domain 77 [Source:HGNC Symbol;Acc:29652]	0.237	7.01144	13.3441	0.000259235	0.00393341
ENSG00000164292	RHOBTB3	Rho-related BTB domain containing 3 [Source:HGNC Symbol;Acc:18757]	-0.223615	8.03304	13.3349	0.000260508	0.00394868
ENSG00000132326	PER2	period homolog 2 (Drosophila) [Source:HGNC Symbol;Acc:8846]	0.479251	4.07018	13.3285	0.0002614	0.00395513
ENSG00000162063	CCNF	cyclin F [Source:HGNC Symbol;Acc:1591]	0.335255	5.58498	13.328	0.000261467	0.00395513
ENSG00000170456	DENND5B	DENN/MADD domain containing 5B [Source:HGNC Symbol;Acc:28338]	-0.302367	6.08405	13.3215	0.000262386	0.00396497
ENSG00000179091	CYC1	cytochrome c-1 [Source:HGNC Symbol;Acc:2579]	0.312185	6.25693	13.2997	0.000265451	0.0040072
ENSG00000179456	ZNF238	zinc finger protein 238 [Source:HGNC Symbol;Acc:13030]	-0.225432	8.2924	13.2924	0.000266485	0.00401503
ENSG00000142039	CCDC97	coiled-coil domain containing 97 [Source:HGNC Symbol;Acc:28289]	0.407965	4.82615	13.2922	0.000266512	0.00401503
ENSG00000172531	PPP1CA	protein phosphatase 1, catalytic subunit, alpha isozyme [Source:HGNC Symbol;Acc:9281]	0.299582	5.87801	13.2876	0.000267161	0.00402072
ENSG00000117016	RIMS3	regulating synaptic membrane exocytosis 3 [Source:HGNC Symbol;Acc:21292]	-0.263357	6.92196	13.2825	0.000267901	0.00402776
ENSG00000074800	ENO1	enolase 1, (alpha) [Source:HGNC Symbol;Acc:3350]	0.203147	9.55112	13.2723	0.000269363	0.00404564
ENSG00000104368	PLAT	plasminogen activator, tissue [Source:HGNC Symbol;Acc:9051]	-1.14439	1.23686	13.2588	0.000271299	0.00407058
ENSG00000111224	PARP11	poly (ADP-ribose) polymerase family, member 11 [Source:HGNC Symbol;Acc:1186]	-0.504998	3.85759	13.2388	0.000274211	0.00411011
ENSG00000050030	KIAA2022	KIAA2022 [Source:HGNC Symbol;Acc:29433]	-0.332034	5.18973	13.2355	0.000274697	0.00411324
ENSG00000006071	ABCC8	ATP-binding cassette, sub-family C (CFTR/MRP), member 8 [Source:HGNC Symbol;Acc:59]	-0.508047	3.29913	13.223	0.000276541	0.00413666
ENSG00000163257	DCAF16	DDB1 and CUL4 associated factor 16 [Source:HGNC Symbol;Acc:25987]	-0.292907	6.59307	13.2069	0.000278926	0.00416813
ENSG00000231500	RPS18	ribosomal protein S18 [Source:HGNC Symbol;Acc:10401]	0.191076	10.2899	13.1951	0.000280689	0.00419024
ENSG00000218891	ZNF579	zinc finger protein 579 [Source:HGNC Symbol;Acc:26646]	0.788131	2.35126	13.1889	0.000281614	0.00419581
ENSG00000221866	PLXNA4	plexin A4 [Source:HGNC Symbol;Acc:9102]	-1.01885	0.654308	13.1888	0.000281628	0.00419581
ENSG00000196998	WDR45	WD repeat domain 45 [Source:HGNC Symbol;Acc:28912]	-0.582752	3.00888	13.1776	0.000283312	0.00421666
ENSG00000238227	C9orf69	chromosome 9 open reading frame 69 [Source:HGNC Symbol;Acc:31009]	0.509338	4.11089	13.1731	0.000283993	0.00422254
ENSG00000198088	NUP62CL	nucleoporin 62kDa C-terminal like [Source:HGNC Symbol;Acc:25960]	-0.640326	2.32822	13.1586	0.000286198	0.00425106
ENSG00000129245	FXR2	fragile X mental retardation, autosomal homolog 2 [Source:HGNC Symbol;Acc:4024]	0.271434	6.34322	13.1564	0.000286543	0.00425191
ENSG00000101333	PLCB4	phospholipase C, beta 4 [Source:HGNC Symbol;Acc:9059]	-0.334949	5.20243	13.1465	0.00028805	0.00427
ENSG00000139687	RB1	retinoblastoma 1 [Source:HGNC Symbol;Acc:9884]	-0.235274	7.46539	13.1397	0.000289098	0.00427851
ENSG00000183258	DDX41	DEAD (Asp-Glu-Ala-Asp) box polypeptide 41 [Source:HGNC Symbol;Acc:18674]	0.330693	5.76128	13.1391	0.000289202	0.00427851
ENSG00000151117	TMEM86A	transmembrane protein 86A [Source:HGNC Symbol;Acc:26890]	-0.756956	1.79367	13.1301	0.000290583	0.00429466
ENSG00000251141	RP11-53O19.1		-0.997598	0.843234	13.1274	0.000291003	0.00429658
ENSG00000135916	ITM2C	integral membrane protein 2C [Source:HGNC Symbol;Acc:6175]	-0.436153	4.47978	13.1175	0.000292555	0.00431519
ENSG00000198695	MT-ND6	mitochondrially encoded NADH dehydrogenase 6 [Source:HGNC Symbol;Acc:7462]	0.203729	9.6034	13.1059	0.00029437	0.00433764
ENSG00000197121	PGAP1	post-GPI attachment to proteins 1 [Source:HGNC Symbol;Acc:25712]	-0.24336	7.0829	13.098	0.000295613	0.00435162
ENSG00000140807	NKD1	naked cuticle homolog 1 (Drosophila) [Source:HGNC Symbol;Acc:17045]	0.568417	5.46033	13.0874	0.000297282	0.00437185
ENSG00000143842	SOX13	SRY (sex determining region Y)-box 13 [Source:HGNC Symbol;Acc:11192]	-1.18047	0.0952095	13.065	0.000300865	0.00442
ENSG00000167552	TUBA1A	tubulin, alpha 1a [Source:HGNC Symbol;Acc:20766]	-0.197688	9.18239	13.0632	0.000301153	0.00442
ENSG00000048162	NOP16	NOP16 nucleolar protein homolog (yeast) [Source:HGNC Symbol;Acc:26934]	0.333637	5.28133	13.0604	0.000301609	0.00442231
ENSG00000135414	GDF11	growth differentiation factor 11 [Source:HGNC Symbol;Acc:4216]	0.389235	4.82129	13.0467	0.000303813	0.00445022
ENSG00000145241	CENPC1	centromere protein C 1 [Source:HGNC Symbol;Acc:1854]	-0.354112	4.7952	13.0415	0.000304664	0.00445827
ENSG00000117500	TMED5	transmembrane emp24 protein transport domain containing 5 [Source:HGNC Symbol;Acc:24251]	0.247051	7.72065	13.034	0.000305891	0.00447181
ENSG00000168495	POLR3D	polymerase (RNA) III (DNA directed) polypeptide D, 44kDa [Source:HGNC Symbol;Acc:1080]	0.283035	6.2256	13.0044	0.000310754	0.00453842
ENSG00000196376	SLC35F1	solute carrier family 35, member F1 [Source:HGNC Symbol;Acc:21483]	-0.356843	4.82638	12.9931	0.000312644	0.00456152
ENSG00000132361	KIAA0664	KIAA0664 [Source:HGNC Symbol;Acc:29094]	0.385092	6.22287	12.9861	0.000313807	0.00457399
ENSG00000071127	WDR1	WD repeat domain 1 [Source:HGNC Symbol;Acc:12754]	0.264673	7.10677	12.9718	0.000316217	0.00460458
ENSG00000104067	TJP1	tight junction protein 1 [Source:HGNC Symbol;Acc:11827]	-0.24105	6.76779	12.9629	0.000317727	0.00462202
ENSG00000244165	P2RY11	purinergic receptor P2Y, G-protein coupled, 11 [Source:HGNC Symbol;Acc:8540]	0.641606	3.13902	12.9393	0.00032175	0.00467595
ENSG00000105640	RPL18A	ribosomal protein L18a [Source:HGNC Symbol;Acc:10311]	0.305581	7.80356	12.9262	0.000324022	0.00470435
ENSG00000106025	TSPAN12	tetraspanin 12 [Source:HGNC Symbol;Acc:21641]	0.619275	2.95646	12.9093	0.00032696	0.00474236
ENSG00000196449	YRDC	yrdC domain containing (E. coli) [Source:HGNC Symbol;Acc:28905]	0.333696	5.32958	12.9036	0.000327952	0.0047521
ENSG00000130164	LDLR	low density lipoprotein receptor [Source:HGNC Symbol;Acc:6547]	0.315271	6.06348	12.901	0.000328407	0.00475403
ENSG00000215021	PHB2	prohibitin 2 [Source:HGNC Symbol;Acc:30306]	0.226891	8.07447	12.8927	0.000329862	0.00476666
ENSG00000070814	TCOF1	Treacher Collins-Franceschetti syndrome 1 [Source:HGNC Symbol;Acc:11654]	0.278949	7.26523	12.8924	0.000329922	0.00476666
ENSG00000152672	CLEC4F	C-type lectin domain family 4, member F [Source:HGNC Symbol;Acc:25357]	-1.31762	-0.122542	12.8844	0.000331331	0.00477811
ENSG00000072210	ALDH3A2	aldehyde dehydrogenase 3 family, member A2 [Source:HGNC Symbol;Acc:403]	-0.29679	5.90101	12.8842	0.00033136	0.00477811
ENSG00000125447	GGA3	golgi-associated, gamma adaptin ear containing, ARF binding protein 3 [Source:HGNC Symbol;Acc:17079]	0.280944	6.28171	12.8733	0.000333311	0.00480156
ENSG00000170852	KBTBD2	kelch repeat and BTB (POZ) domain containing 2 [Source:HGNC Symbol;Acc:21751]	-0.255304	6.29768	12.8707	0.000333759	0.00480335
ENSG00000130255	RPL36	ribosomal protein L36 [Source:HGNC Symbol;Acc:13631]	0.321139	7.53749	12.862	0.000335322	0.00482115
ENSG00000119684	MLH3	mutL homolog 3 (E. coli) [Source:HGNC Symbol;Acc:7128]	0.983966	1.07125	12.8579	0.000336064	0.00482713
ENSG00000145721	LIX1	Lix1 homolog (chicken) [Source:HGNC Symbol;Acc:18581]	-0.802274	1.97095	12.8532	0.00033691	0.00483164
ENSG00000162992	NEUROD1	neuronal differentiation 1 [Source:HGNC Symbol;Acc:7762]	-0.205637	8.11825	12.8525	0.00033703	0.00483164
ENSG00000067715	SYT1	synaptotagmin I [Source:HGNC Symbol;Acc:11509]	-0.207646	8.29445	12.8308	0.000340957	0.00488048
ENSG00000118292	C1orf54	chromosome 1 open reading frame 54 [Source:HGNC Symbol;Acc:26258]	-0.68828	2.29631	12.83	0.000341097	0.00488048
A)			-0.369464	5.34144	12.8228	0.000342424	0.00489474
ENSG00000197714	ZNF460	zinc finger protein 460 [Source:HGNC Symbol;Acc:21628]	0.845975	1.79873	12.8177	0.000343364	0.00490345
ENSG00000132507	EIF5A	eukaryotic translation initiation factor 5A [Source:HGNC Symbol;Acc:3300]	0.261415	7.81656	12.8128	0.00034426	0.00491151
ENSG00000196361	ELAVL3	ELAV (embryonic lethal, abnormal vision, Drosophila)-like 3 (Hu antigen C) [Source:HGNC Symbol;Acc:3314]	0.315294	5.83183	12.8033	0.000346008	0.00493114
ENSG00000014914	MTMR11	myotubularin related protein 11 [Source:HGNC Symbol;Acc:24307]	0.786341	2.75555	12.8017	0.000346302	0.00493114
ENSG00000006468	ETV1	ets variant 1 [Source:HGNC Symbol;Acc:3490]	-0.654682	2.44919	12.7912	0.000348262	0.00495205
ENSG00000162819	BROX	BRO1 domain and CAAX motif containing [Source:HGNC Symbol;Acc:26512]	-0.273378	6.13462	12.7902	0.000348439	0.00495205
ENSG00000033122	LRRC7	leucine rich repeat containing 7 [Source:HGNC Symbol;Acc:18531]	-0.764032	1.40583	12.7761	0.000351078	0.00498083
ENSG00000123975	CKS2	CDC28 protein kinase regulatory subunit 2 [Source:HGNC Symbol;Acc:2000]	0.265312	7.10048	12.7758	0.000351137	0.00498083
ENSG00000070669	ASNS	asparagine synthetase (glutamine-hydrolyzing) [Source:HGNC Symbol;Acc:753]	0.229985	7.14299	12.7573	0.000354621	0.00502544
ENSG00000091622	PITPNM3	PITPNM family member 3 [Source:HGNC Symbol;Acc:21043]	-0.884182	1.02396	12.7367	0.000358544	0.00507219
ENSG00000169783	LINGO1	leucine rich repeat and Ig domain containing 1 [Source:HGNC Symbol;Acc:21205]	-0.75662	1.94835	12.7364	0.000358605	0.00507219
ENSG00000185298	CCDC137	coiled-coil domain containing 137 [Source:HGNC Symbol;Acc:33451]	0.356018	5.95134	12.7323	0.000359396	0.00507852
ENSG00000005812	FBXL3	F-box and leucine-rich repeat protein 3 [Source:HGNC Symbol;Acc:13599]	-0.353171	5.0386	12.7131	0.0003631	0.00512597
ENSG00000106479	ZNF862	zinc finger protein 862 [Source:HGNC Symbol;Acc:34519]	0.846919	1.73701	12.7088	0.000363939	0.00513293
ENSG00000215472	RP11-110H1.2	60S ribosomal protein L17 [Source:UniProtKB/Swiss-Prot;Acc:P18621]	0.189346	9.4212	12.7053	0.000364616	0.00513758
ENSG00000011052	NME2	NME/NM23 nucleoside diphosphate kinase 2 [Source:HGNC Symbol;Acc:7850]	0.735476	2.71823	12.7032	0.000365028	0.00513791
ENSG00000180530	NRIP1	nuclear receptor interacting protein 1 [Source:HGNC Symbol;Acc:8001]	-0.22568	7.76152	12.7017	0.000365333	0.00513791
ENSG00000171517	LPAR3	lysophosphatidic acid receptor 3 [Source:HGNC Symbol;Acc:14298]	0.349515	4.91774	12.6976	0.000366126	0.00514418
ENSG00000074054	CLASP1	cytoplasmic linker associated protein 1 [Source:HGNC Symbol;Acc:17088]	-0.230183	6.96183	12.6819	0.000369208	0.00518256
ENSG00000169718	DUS1L	dihydrouridine synthase 1-like (S. cerevisiae) [Source:HGNC Symbol;Acc:30086]	0.315409	6.45917	12.6794	0.000369716	0.00518478
ENSG00000108379	WNT3	wingless-type MMTV integration site family, member 3 [Source:HGNC Symbol;Acc:12782]	-0.781253	1.63789	12.6755	0.000370484	0.00519064
ENSG00000102890	ELMO3	engulfment and cell motility 3 [Source:HGNC Symbol;Acc:17289]	1.06267	1.13175	12.6737	0.000370839	0.00519069
ENSG00000081913	PHLPP1	PH domain and leucine rich repeat protein phosphatase 1 [Source:HGNC Symbol;Acc:20610]	-0.497454	3.62693	12.6525	0.000375059	0.00524481
ENSG00000164830	OXR1	oxidation resistance 1 [Source:HGNC Symbol;Acc:15822]	-0.338305	5.5008	12.6324	0.000379114	0.00529651
ENSG00000142544	CTU1	cytosolic thiouridylase subunit 1 homolog (S. pombe) [Source:HGNC Symbol;Acc:29590]	0.978076	1.4314	12.6272	0.000380182	0.00530642
ENSG00000260230	RP11-526J3.3		-0.391105	4.74509	12.6211	0.000381426	0.00531878
ENSG00000197728	RPS26	ribosomal protein S26 [Source:HGNC Symbol;Acc:10414]	0.241119	6.66963	12.6186	0.000381937	0.0053209
ENSG00000158615	PPP1R15B	protein phosphatase 1, regulatory subunit 15B [Source:HGNC Symbol;Acc:14951]	0.205688	8.12435	12.608	0.000384109	0.00534612
ENSG00000228463	AP006222.2		-1.00158	0.998902	12.5907	0.000387671	0.00538981
ENSG00000101115	SALL4	sal-like 4 (Drosophila) [Source:HGNC Symbol;Acc:15924]	-0.45836	3.66584	12.5892	0.000387976	0.00538981
ENSG00000188647	PTAR1	protein prenyltransferase alpha subunit repeat containing 1 [Source:HGNC Symbol;Acc:30449]	-0.210374	8.18759	12.558	0.000394512	0.00547203
ENSG00000198576	ARC	activity-regulated cytoskeleton-associated protein [Source:HGNC Symbol;Acc:648]	0.901892	3.08483	12.5559	0.000394952	0.00547203
ENSG00000120519	SLC10A7	solute carrier family 10 (sodium/bile acid cotransporter family), member 7 [Source:HGNC Symbol;Acc:23088]	-0.514532	3.09074	12.5557	0.000395003	0.00547203
ENSG00000244313	RP11-425L10.1		0.290252	6.03536	12.5537	0.000395416	0.00547263
ENSG00000162753	SLC9C2	solute carrier family 9, member C2 (putative) [Source:HGNC Symbol;Acc:28664]	-1.46399	-0.998985	12.548	0.000396637	0.00548247
ENSG00000145246	ATP10D	ATPase, class V, type 10D [Source:HGNC Symbol;Acc:13549]	-0.332473	5.25066	12.5469	0.000396867	0.00548247
ENSG00000089685	BIRC5	baculoviral IAP repeat containing 5 [Source:HGNC Symbol;Acc:593]	0.203906	7.70549	12.5402	0.000398289	0.00549199
ENSG00000170011	MYRIP	myosin VIIA and Rab interacting protein [Source:HGNC Symbol;Acc:19156]	-0.450842	3.72968	12.54	0.000398341	0.00549199
ENSG00000140497	SCAMP2	secretory carrier membrane protein 2 [Source:HGNC Symbol;Acc:10564]	0.3321	5.28727	12.5384	0.000398669	0.00549199
ENSG00000169180	XPO6	exportin 6 [Source:HGNC Symbol;Acc:19733]	0.219992	7.39896	12.5351	0.000399368	0.00549644
ENSG00000125835	SNRPB	small nuclear ribonucleoprotein polypeptides B and B1 [Source:HGNC Symbol;Acc:11153]	0.269809	6.88537	12.5334	0.000399734	0.00549644
ENSG00000245532	NEAT1	nuclear paraspeckle assembly transcript 1 (non-protein coding) [Source:HGNC Symbol;Acc:30815]	-0.300863	7.31595	12.5225	0.000402074	0.00552217
ENSG00000168268	NT5DC2	5'-nucleotidase domain containing 2 [Source:HGNC Symbol;Acc:25717]	0.270079	7.59011	12.5212	0.000402352	0.00552217
ENSG00000091490	SEL1L3	sel-1 suppressor of lin-12-like 3 (C. elegans) [Source:HGNC Symbol;Acc:29108]	-0.514245	3.45121	12.5177	0.000403112	0.00552749
ENSG00000213290	CTD-2192J16.12		1.0612	0.56712	12.5153	0.000403626	0.00552942
ENSG00000005108	THSD7A	thrombospondin, type I, domain containing 7A [Source:HGNC Symbol;Acc:22207]	-0.67962	2.90864	12.5067	0.000405493	0.00554986
ENSG00000136205	TNS3	tensin 3 [Source:HGNC Symbol;Acc:21616]	-0.420438	4.16421	12.4979	0.000407411	0.00557095
ENSG00000144891	AGTR1	angiotensin II receptor, type 1 [Source:HGNC Symbol;Acc:336]	-0.76413	1.63561	12.4865	0.000409909	0.00559994
ENSG00000232019	AC074183.4		1.18258	0.691492	12.4814	0.000411021	0.00560997
ENSG00000116199	FAM20B	family with sequence similarity 20, member B [Source:HGNC Symbol;Acc:23017]	-0.214109	7.33164	12.4726	0.000412961	0.00563125
ENSG00000038295	TLL1	tolloid-like 1 [Source:HGNC Symbol;Acc:11843]	1.16788	1.23803	12.4699	0.000413566	0.00563431
ENSG00000129521	EGLN3	egl nine homolog 3 (C. elegans) [Source:HGNC Symbol;Acc:14661]	-0.680134	2.254	12.4264	0.000423302	0.00576165
ENSG00000232856	hsa-mir-3654	hsa-mir-3654 [Source:miRBase;Acc:MI0016054]	0.292119	5.87658	12.4233	0.000424016	0.00576608
ENSG00000164932	CTHRC1	collagen triple helix repeat containing 1 [Source:HGNC Symbol;Acc:18831]	-0.97311	1.12482	12.4085	0.000427373	0.0058064
ENSG00000244567	AC096772.6		-0.73378	2.17009	12.3919	0.000431207	0.00585028
ENSG00000166508	MCM7	minichromosome maintenance complex component 7 [Source:HGNC Symbol;Acc:6950]	-0.235608	8.01775	12.3911	0.000431394	0.00585028
ENSG00000197976	AKAP17A	A kinase (PRKA) anchor protein 17A [Source:HGNC Symbol;Acc:18783]	0.318958	5.50602	12.3879	0.000432134	0.00585495
ENSG00000164077	MON1A	MON1 homolog A (yeast) [Source:HGNC Symbol;Acc:28207]	0.556079	3.45475	12.3665	0.000437105	0.0059169
ENSG00000119547	ONECUT2	one cut homeobox 2 [Source:HGNC Symbol;Acc:8139]	0.231773	7.47887	12.3585	0.000438974	0.00592805
ENSG00000152520	PAN3	PAN3 poly(A) specific ribonuclease subunit homolog (S. cerevisiae) [Source:HGNC Symbol;Acc:29991]	-0.340797	5.09618	12.3581	0.000439086	0.00592805
ENSG00000147180	ZNF711	zinc finger protein 711 [Source:HGNC Symbol;Acc:13128]	-0.248502	6.47771	12.3579	0.000439129	0.00592805
ENSG00000183853	KIRREL	kin of IRRE like (Drosophila) [Source:HGNC Symbol;Acc:15734]	-0.204385	8.29943	12.3538	0.000440095	0.00593568
ENSG00000178235	SLITRK1	SLIT and NTRK-like family, member 1 [Source:HGNC Symbol;Acc:20297]	0.685465	3.09013	12.3452	0.000442111	0.00595744
ENSG00000177058	SLC38A9	solute carrier family 38, member 9 [Source:HGNC Symbol;Acc:26907]	-0.352302	4.92857	12.3251	0.000446916	0.00601161
ENSG00000069702	TGFBR3	transforming growth factor, beta receptor III [Source:HGNC Symbol;Acc:11774]	-0.483904	3.21541	12.325	0.000446943	0.00601161
ENSG00000127914	AKAP9	A kinase (PRKA) anchor protein (yotiao) 9 [Source:HGNC Symbol;Acc:379]	-0.21803	7.69184	12.3202	0.000448071	0.00601839
ENSG00000239672	NME1	NME/NM23 nucleoside diphosphate kinase 1 [Source:HGNC Symbol;Acc:7849]	0.204264	7.91258	12.3195	0.00044826	0.00601839
ENSG00000079308	TNS1	tensin 1 [Source:HGNC Symbol;Acc:11973]	-0.532749	3.27779	12.3174	0.000448753	0.00601955
ENSG00000124587	PEX6	peroxisomal biogenesis factor 6 [Source:HGNC Symbol;Acc:8859]	0.495945	4.11532	12.3024	0.000452384	0.00606276
ENSG00000151276	MAGI1	membrane associated guanylate kinase, WW and PDZ domain containing 1 [Source:HGNC Symbol;Acc:946]	-0.316492	5.35253	12.2999	0.00045299	0.0060654
ENSG00000144867	SRPRB	signal recognition particle receptor, B subunit [Source:HGNC Symbol;Acc:24085]	0.249388	6.51056	12.2809	0.000457608	0.0061217
ENSG00000116171	SCP2	sterol carrier protein 2 [Source:HGNC Symbol;Acc:10606]	-0.228902	7.16318	12.2766	0.000458684	0.00613055
ENSG00000198400	NTRK1	neurotrophic tyrosine kinase, receptor, type 1 [Source:HGNC Symbol;Acc:8031]	-0.39352	5.42948	12.2741	0.0004593	0.00613325
ENSG00000167196	FBXO22	F-box protein 22 [Source:HGNC Symbol;Acc:13593]	0.233697	7.11832	12.2659	0.000461299	0.00615439
ENSG00000153157	SYCP2L	synaptonemal complex protein 2-like [Source:HGNC Symbol;Acc:21537]	-0.439471	3.90671	12.2596	0.000462862	0.00616968
ENSG00000106069	CHN2	chimerin (chimaerin) 2 [Source:HGNC Symbol;Acc:1944]	-0.412556	4.13301	12.2473	0.000465922	0.00620202
ENSG00000198010	DLGAP2	discs, large (Drosophila) homolog-associated protein 2 [Source:HGNC Symbol;Acc:2906]	-1.4519	-0.068161	12.2465	0.000466125	0.00620202
ENSG00000122756	CNTFR	ciliary neurotrophic factor receptor [Source:HGNC Symbol;Acc:2170]	0.412889	5.21592	12.2378	0.000468322	0.00622565
ENSG00000100644	HIF1A	hypoxia inducible factor 1, alpha subunit (basic helix-loop-helix transcription factor) [Source:HGNC Symbol;Acc:4910]	-0.217507	8.6161	12.2267	0.000471095	0.00625691
ENSG00000066777	ARFGEF1	ADP-ribosylation factor guanine nucleotide-exchange factor 1 (brefeldin A-inhibited) [Source:HGNC Symbol;Acc:15772]	-0.241451	6.68771	12.2133	0.000474507	0.00629657
ENSG00000196230	TUBB	tubulin, beta class I [Source:HGNC Symbol;Acc:20778]	0.173967	11.2565	12.211	0.000475092	0.00629868
ENSG00000178662	CSRNP3	cysteine-serine-rich nuclear protein 3 [Source:HGNC Symbol;Acc:30729]	-0.419337	4.20516	12.2092	0.00047554	0.00629899
ENSG00000113300	CNOT6	CCR4-NOT transcription complex, subunit 6 [Source:HGNC Symbol;Acc:14099]	-0.217035	7.66333	12.2066	0.000476216	0.00630231
ENSG00000115504	EHBP1	EH domain binding protein 1 [Source:HGNC Symbol;Acc:29144]	-0.342585	4.93584	12.2031	0.000477089	0.00630822
ENSG00000100441	KHNYN	KH and NYN domain containing [Source:HGNC Symbol;Acc:20166]	-0.329824	5.19914	12.1951	0.000479157	0.00632991
ENSG00000169230	PRELID1	PRELI domain containing 1 [Source:HGNC Symbol;Acc:30255]	0.387452	4.97244	12.1913	0.000480131	0.00633714
ENSG00000183044	ABAT	4-aminobutyrate aminotransferase [Source:HGNC Symbol;Acc:23]	-0.380843	4.64001	12.1896	0.000480569	0.00633726
ENSG00000163818	LZTFL1	leucine zipper transcription factor-like 1 [Source:HGNC Symbol;Acc:6741]	-0.387964	5.12825	12.1826	0.000482384	0.00635554
ENSG00000196167	C11orf92	chromosome 11 open reading frame 92 [Source:HGNC Symbol;Acc:33789]	-0.398346	4.07646	12.1753	0.00048427	0.00637385
ENSG00000064989	CALCRL	calcitonin receptor-like [Source:HGNC Symbol;Acc:16709]	-1.69949	-0.0181338	12.1738	0.00048466	0.00637385
ENSG00000182601	HS3ST4	heparan sulfate (glucosamine) 3-O-sulfotransferase 4 [Source:HGNC Symbol;Acc:5200]	-0.513603	3.44608	12.1722	0.000485065	0.00637385
ENSG00000056998	GYG2	glycogenin 2 [Source:HGNC Symbol;Acc:4700]	-0.431981	4.00974	12.1684	0.000486072	0.00638142
ENSG00000170291	ELP5	elongator acetyltransferase complex subunit 5 [Source:HGNC Symbol;Acc:30617]	0.329336	5.45282	12.145	0.000492196	0.00645609
ENSG00000196235	SUPT5H	suppressor of Ty 5 homolog (S. cerevisiae) [Source:HGNC Symbol;Acc:11469]	0.277744	6.99175	12.1179	0.000499391	0.00654467
ENSG00000229119	CTB-63M22.1		0.418806	4.12563	12.1152	0.000500124	0.00654849
ENSG00000065243	PKN2	protein kinase N2 [Source:HGNC Symbol;Acc:9406]	-0.21728	7.55769	12.1122	0.000500926	0.00655319
ENSG00000113407	TARS	threonyl-tRNA synthetase [Source:HGNC Symbol;Acc:11572]	0.19289	8.46977	12.1106	0.000501369	0.00655319
ENSG00000053438	NNAT	neuronatin [Source:HGNC Symbol;Acc:7860]	-0.206005	8.69749	12.1063	0.000502522	0.00656248
ENSG00000188760	TMEM198	transmembrane protein 198 [Source:HGNC Symbol;Acc:33704]	0.536829	3.11913	12.1032	0.000503341	0.00656738
ENSG00000105663	MLL4	Histone-lysine N-methyltransferase MLL4 [Source:UniProtKB/Swiss-Prot;Acc:Q9UMN6]	0.397297	5.72582	12.0889	0.00050723	0.00661229
ENSG00000198369	SPRED2	sprouty-related, EVH1 domain containing 2 [Source:HGNC Symbol;Acc:17722]	-0.345037	5.1005	12.0607	0.000514951	0.00670705
ENSG00000090097	PCBP4	poly(rC) binding protein 4 [Source:HGNC Symbol;Acc:8652]	0.305638	6.74814	12.0452	0.000519263	0.00675727
ENSG00000149930	TAOK2	TAO kinase 2 [Source:HGNC Symbol;Acc:16835]	0.363283	5.68394	12.0366	0.00052165	0.00678237
ENSG00000165802	NELF	nasal embryonic LHRH factor [Source:HGNC Symbol;Acc:29843]	0.355148	5.68296	12.0324	0.000522842	0.00678742
ENSG00000139239	RPL14P1	ribosomal protein L14 pseudogene 1 [Source:HGNC Symbol;Acc:31384]	0.300951	5.81935	12.032	0.000522956	0.00678742
ENSG00000156273	BACH1	BTB and CNC homology 1, basic leucine zipper transcription factor 1 [Source:HGNC Symbol;Acc:935]	-0.269165	6.77899	12.0224	0.000525659	0.00681653
ENSG00000105671	DDX49	DEAD (Asp-Glu-Ala-Asp) box polypeptide 49 [Source:HGNC Symbol;Acc:18684]	0.353177	5.22132	12.0163	0.000527364	0.00683267
ENSG00000177570	SAMD12	sterile alpha motif domain containing 12 [Source:HGNC Symbol;Acc:31750]	-0.548724	3.47363	12.0111	0.000528842	0.00684143
ENSG00000176182	MYPOP	Myb-related transcription factor, partner of profilin [Source:HGNC Symbol;Acc:20178]	0.772938	2.03226	12.0107	0.000528965	0.00684143
ENSG00000257093	KIAA1147	KIAA1147 [Source:HGNC Symbol;Acc:29472]	-0.256445	6.18921	12.0034	0.000531038	0.00686225
ENSG00000146232	NFKBIE	nuclear factor of kappa light polypeptide gene enhancer in B-cells inhibitor, epsilon [Source:HGNC Symbol;Acc:7799]	0.630333	2.4612	11.9992	0.000532234	0.00687171
ENSG00000164096	C4orf3	chromosome 4 open reading frame 3 [Source:HGNC Symbol;Acc:19225]	-0.24298	6.46397	11.9774	0.00053849	0.00694643
ENSG00000162630	B3GALT2	UDP-Gal:betaGlcNAc beta 1,3-galactosyltransferase, polypeptide 2 [Source:HGNC Symbol;Acc:917]	-0.405617	4.22366	11.9718	0.000540112	0.00696129
ENSG00000180537	RNF182	ring finger protein 182 [Source:HGNC Symbol;Acc:28522]	-0.363007	4.76191	11.9475	0.000547205	0.00704658
ENSG00000260293	RP11-715J22.6		-0.636137	2.18417	11.9393	0.000549614	0.00707144
ENSG00000090530	LEPREL1	leprecan-like 1 [Source:HGNC Symbol;Acc:19317]	0.857444	2.34461	11.9025	0.000560593	0.00720645
ENSG00000109790	KLHL5	kelch-like 5 (Drosophila) [Source:HGNC Symbol;Acc:6356]	-0.298168	5.42866	11.8947	0.000562943	0.00723038
ENSG00000184867	ARMCX2	armadillo repeat containing, X-linked 2 [Source:HGNC Symbol;Acc:16869]	-0.255115	6.21369	11.8912	0.000563986	0.00723749
ENSG00000198863	RUNDC1	RUN domain containing 1 [Source:HGNC Symbol;Acc:25418]	0.265996	6.06787	11.8853	0.00056578	0.00725423
ENSG00000151835	SACS	spastic ataxia of Charlevoix-Saguenay (sacsin) [Source:HGNC Symbol;Acc:10519]	0.187081	8.93298	11.8805	0.000567244	0.00726358
ENSG00000107819	SFXN3	sideroflexin 3 [Source:HGNC Symbol;Acc:16087]	-0.496053	3.78429	11.8784	0.000567901	0.00726358
ENSG00000177200	CHD9	chromodomain helicase DNA binding protein 9 [Source:HGNC Symbol;Acc:25701]	-0.223928	7.23375	11.8781	0.00056798	0.00726358
ENSG00000181541	MAB21L2	mab-21-like 2 (C. elegans) [Source:HGNC Symbol;Acc:6758]	0.316405	5.70903	11.8622	0.000572846	0.00731777
ENSG00000175063	UBE2C	ubiquitin-conjugating enzyme E2C [Source:HGNC Symbol;Acc:15937]	0.253457	6.51724	11.861	0.000573207	0.00731777
ENSG00000153130	SCOC	short coiled-coil protein [Source:HGNC Symbol;Acc:20335]	-0.26707	6.47717	11.8518	0.000576066	0.00734794
ENSG00000155657	TTN	titin [Source:HGNC Symbol;Acc:12403]	-0.280269	5.89546	11.8471	0.000577515	0.00736008
ENSG00000128833	MYO5C	myosin VC [Source:HGNC Symbol;Acc:7604]	-0.897275	1.22276	11.8442	0.000578402	0.00736505
ENSG00000087074	PPP1R15A	protein phosphatase 1, regulatory subunit 15A [Source:HGNC Symbol;Acc:14375]	-0.40551	4.41803	11.8394	0.000579903	0.00737782
ENSG00000126950	TMEM35	transmembrane protein 35 [Source:HGNC Symbol;Acc:25864]	-0.440744	4.18894	11.8378	0.000580413	0.00737797
ENSG00000165475	CRYL1	crystallin, lambda 1 [Source:HGNC Symbol;Acc:18246]	-1.04928	0.702432	11.8235	0.000584883	0.00742598
ENSG00000085552	IGSF9	immunoglobulin superfamily, member 9 [Source:HGNC Symbol;Acc:18132]	0.39929	5.73056	11.8225	0.000585192	0.00742598
ENSG00000152439	ZNF773	zinc finger protein 773 [Source:HGNC Symbol;Acc:30487]	-0.691229	2.38434	11.8198	0.000586048	0.00743046
ENSG00000130844	ZNF331	zinc finger protein 331 [Source:HGNC Symbol;Acc:15489]	0.29426	5.6517	11.818	0.000586604	0.00743115
ENSG00000047410	TPR	translocated promoter region, nuclear basket protein [Source:HGNC Symbol;Acc:12017]	-0.178494	9.2765	11.8069	0.000590114	0.00746923
ENSG00000183662	FAM19A1	family with sequence similarity 19 (chemokine (C-C motif)-like), member A1 [Source:HGNC Symbol;Acc:21587]	-0.914425	0.905881	11.7972	0.000593214	0.00750205
ENSG00000103653	CSK	c-src tyrosine kinase [Source:HGNC Symbol;Acc:2444]	0.316755	5.72955	11.7771	0.00059963	0.00757625
ENSG00000197756	RPL37A	ribosomal protein L37a [Source:HGNC Symbol;Acc:10348]	0.195528	8.79881	11.7757	0.000600104	0.00757625
ENSG00000196214	ZNF766	zinc finger protein 766 [Source:HGNC Symbol;Acc:28063]	-0.351237	4.7654	11.7733	0.000600854	0.00757926
ENSG00000123933	MXD4	MAX dimerization protein 4 [Source:HGNC Symbol;Acc:13906]	-0.37253	5.63751	11.7663	0.00060312	0.00760136
ENSG00000183864	TOB2	transducer of ERBB2, 2 [Source:HGNC Symbol;Acc:11980]	0.282796	6.26519	11.7627	0.00060429	0.00760963
ENSG00000213639	PPP1CB	protein phosphatase 1, catalytic subunit, beta isozyme [Source:HGNC Symbol;Acc:9282]	-0.239986	7.55629	11.7578	0.000605895	0.00762337
ENSG00000019549	SNAI2	snail homolog 2 (Drosophila) [Source:HGNC Symbol;Acc:11094]	-0.283657	5.84479	11.7483	0.000608991	0.00765582
ENSG00000117620	SLC35A3	solute carrier family 35 (UDP-N-acetylglucosamine (UDP-GlcNAc) transporter), member A3 [Source:HGNC Symbol;Acc:11023]	-0.317462	5.70399	11.7401	0.000611674	0.0076799
ENSG00000147403	RPL10	ribosomal protein L10 [Source:HGNC Symbol;Acc:10298]	0.207394	9.20538	11.7393	0.000611944	0.0076799
ENSG00000165973	NELL1	NEL-like 1 (chicken) [Source:HGNC Symbol;Acc:7750]	-0.517001	3.44596	11.7268	0.000616049	0.00772487
ENSG00000181019	NQO1	NAD(P)H dehydrogenase, quinone 1 [Source:HGNC Symbol;Acc:2874]	-0.330692	5.39378	11.7136	0.000620445	0.00777341
ENSG00000131844	MCCC2	methylcrotonoyl-CoA carboxylase 2 (beta) [Source:HGNC Symbol;Acc:6937]	-0.281778	5.93392	11.7107	0.000621404	0.00777884
ENSG00000132792	CTNNBL1	catenin, beta like 1 [Source:HGNC Symbol;Acc:15879]	0.255459	6.16846	11.7062	0.00062293	0.00779028
ENSG00000106080	FKBP14	FK506 binding protein 14, 22 kDa [Source:HGNC Symbol;Acc:18625]	0.305701	5.61604	11.7037	0.000623745	0.00779028
ENSG00000127980	PEX1	peroxisomal biogenesis factor 1 [Source:HGNC Symbol;Acc:8850]	-0.342299	4.89254	11.7033	0.000623896	0.00779028
ENSG00000143995	MEIS1	Meis homeobox 1 [Source:HGNC Symbol;Acc:7000]	-0.227542	7.43636	11.6971	0.000625991	0.00780986
ENSG00000008294	SPAG9	sperm associated antigen 9 [Source:HGNC Symbol;Acc:14524]	-0.189916	8.27477	11.6923	0.000627596	0.00781709
ENSG00000085999	RAD54L	RAD54-like (S. cerevisiae) [Source:HGNC Symbol;Acc:9826]	0.399103	4.60752	11.6883	0.000628934	0.00781709
ENSG00000125970	RALY	RNA binding protein, autoantigenic (hnRNP-associated with lethal yellow homolog (mouse)) [Source:HGNC Symbol;Acc:15921]	0.300946	6.10015	11.6883	0.000628957	0.00781709
ENSG00000118922	KLF12	Kruppel-like factor 12 [Source:HGNC Symbol;Acc:6346]	-0.30742	5.60976	11.6878	0.000629105	0.00781709
ENSG00000244462	RBM12	RNA binding motif protein 12 [Source:HGNC Symbol;Acc:9898]	-0.246947	7.78655	11.6868	0.000629445	0.00781709
ENSG00000107282	APBA1	amyloid beta (A4) precursor protein-binding, family A, member 1 [Source:HGNC Symbol;Acc:578]	-0.35489	5.24746	11.686	0.000629738	0.00781709
ENSG00000118482	PHF3	PHD finger protein 3 [Source:HGNC Symbol;Acc:8921]	-0.231183	6.94734	11.6768	0.000632857	0.0078437
ENSG00000144815	NXPE3	neurexophilin and PC-esterase domain family, member 3 [Source:HGNC Symbol;Acc:28238]	-0.248689	6.24375	11.6765	0.000632941	0.0078437
ENSG00000203879	GDI1	GDP dissociation inhibitor 1 [Source:HGNC Symbol;Acc:4226]	0.256691	7.26783	11.655	0.000640305	0.00792832
ENSG00000021826	CPS1	carbamoyl-phosphate synthase 1, mitochondrial [Source:HGNC Symbol;Acc:2323]	-0.390685	4.2267	11.6462	0.000643323	0.00795904
ENSG00000111247	RAD51AP1	RAD51 associated protein 1 [Source:HGNC Symbol;Acc:16956]	-0.282882	5.98173	11.6419	0.000644836	0.007967
ENSG00000214113	LYRM4	LYR motif containing 4 [Source:HGNC Symbol;Acc:21365]	0.354156	4.71041	11.6413	0.000645043	0.007967
ENSG00000164086	DUSP7	dual specificity phosphatase 7 [Source:HGNC Symbol;Acc:3073]	0.400239	4.57193	11.638	0.000646173	0.00797432
ENSG00000114423	CBLB	Cbl proto-oncogene, E3 ubiquitin protein ligase B [Source:HGNC Symbol;Acc:1542]	-0.299073	5.46619	11.6321	0.000648246	0.00799323
ENSG00000162817	C1orf115	chromosome 1 open reading frame 115 [Source:HGNC Symbol;Acc:25873]	-0.446001	3.89295	11.6276	0.000649794	0.00800329
ENSG00000196693	ZNF33B	zinc finger protein 33B [Source:HGNC Symbol;Acc:13097]	-0.276452	6.177	11.6266	0.000650142	0.00800329
ENSG00000118263	KLF7	Kruppel-like factor 7 (ubiquitous) [Source:HGNC Symbol;Acc:6350]	-0.24075	6.64014	11.6138	0.000654657	0.00804793
ENSG00000254635	RP11-164A7.1		-0.31921	5.1446	11.6132	0.000654855	0.00804793
ENSG00000105364	MRPL4	mitochondrial ribosomal protein L4 [Source:HGNC Symbol;Acc:14276]	0.434657	4.94724	11.6103	0.000655878	0.00805381
ENSG00000165244	ZNF367	zinc finger protein 367 [Source:HGNC Symbol;Acc:18320]	-0.392974	4.47215	11.6061	0.00065737	0.00806545
ENSG00000176102	CSTF3	cleavage stimulation factor, 3' pre-RNA, subunit 3, 77kDa [Source:HGNC Symbol;Acc:2485]	-0.217985	6.98881	11.591	0.000662707	0.0081242
ENSG00000148180	GSN	gelsolin [Source:HGNC Symbol;Acc:4620]	-1.03256	0.42872	11.5755	0.000668278	0.00818572
ENSG00000197579	TOPORS	topoisomerase I binding, arginine/serine-rich, E3 ubiquitin protein ligase [Source:HGNC Symbol;Acc:21653]	-0.288777	5.65174	11.5667	0.000671442	0.00821759
ENSG00000132780	NASP	nuclear autoantigenic sperm protein (histone-binding) [Source:HGNC Symbol;Acc:7644]	-0.188338	8.99893	11.5652	0.00067199	0.00821759
ENSG00000215397	SCRT2	scratch homolog 2, zinc finger protein (Drosophila) [Source:HGNC Symbol;Acc:15952]	0.865475	2.03776	11.5588	0.00067429	0.00823891
ENSG00000177943	MAMDC4	MAM domain containing 4 [Source:HGNC Symbol;Acc:24083]	1.04039	1.08055	11.5543	0.00067591	0.0082519
ENSG00000179598	PLD6	phospholipase D family, member 6 [Source:HGNC Symbol;Acc:30447]	0.332746	5.16063	11.5488	0.000677917	0.00826958
ENSG00000137154	RPS6	ribosomal protein S6 [Source:HGNC Symbol;Acc:10429]	0.163528	10.5203	11.5408	0.000680853	0.00829856
ENSG00000233280	AC110491.1	Beta/gamma crystallin domain-containing protein 3; cDNA FLJ60082, weakly similar to Uro-adherence factor A [Source:UniProtKB/TrEMBL;Acc:B4DLE8]	0.327953	5.21722	11.5378	0.000681971	0.00830535
ENSG00000099899	TRMT2A	tRNA methyltransferase 2 homolog A (S. cerevisiae) [Source:HGNC Symbol;Acc:24974]	0.468344	4.16844	11.527	0.000685914	0.00834651
ENSG00000197989	SNHG12	small nucleolar RNA host gene 12 (non-protein coding) [Source:HGNC Symbol;Acc:30062]	0.327552	5.16333	11.5234	0.000687241	0.00835579
ENSG00000144935	TRPC1	transient receptor potential cation channel, subfamily C, member 1 [Source:HGNC Symbol;Acc:12333]	-0.465515	3.60635	11.5194	0.000688725	0.00836697
ENSG00000255302	EID1	EP300 interacting inhibitor of differentiation 1 [Source:HGNC Symbol;Acc:1191]	-0.235527	8.59429	11.5076	0.000693139	0.00841353
ENSG00000116761	CTH	cystathionase (cystathionine gamma-lyase) [Source:HGNC Symbol;Acc:2501]	-0.389295	4.39303	11.5061	0.000693694	0.00841353
ENSG00000255248	RP11-166D19.1		-1.03587	0.437705	11.5017	0.000695327	0.00842643
ENSG00000167526	RPL13	ribosomal protein L13 [Source:HGNC Symbol;Acc:10303]	0.274923	7.57143	11.4741	0.00070574	0.00854563
ENSG00000123505	AMD1	adenosylmethionine decarboxylase 1 [Source:HGNC Symbol;Acc:457]	0.210662	8.13118	11.4705	0.000707105	0.00855517
ENSG00000115457	IGFBP2	insulin-like growth factor binding protein 2, 36kDa [Source:HGNC Symbol;Acc:5471]	0.433097	4.50946	11.4676	0.00070822	0.00856165
ENSG00000214756	METTL12	methyltransferase like 12 [Source:HGNC Symbol;Acc:33113]	0.638478	2.408	11.4618	0.000710406	0.00856693
ENSG00000057935	MTA3	metastasis associated 1 family, member 3 [Source:HGNC Symbol;Acc:23784]	-0.282567	5.64941	11.4608	0.000710783	0.00856693
ENSG00000198796	ALPK2	alpha-kinase 2 [Source:HGNC Symbol;Acc:20565]	-0.419757	4.39889	11.4606	0.000710873	0.00856693
ENSG00000186310	NAP1L3	nucleosome assembly protein 1-like 3 [Source:HGNC Symbol;Acc:7639]	-0.331514	4.9858	11.4603	0.00071097	0.00856693
ENSG00000143971	ETAA1	Ewing tumor-associated antigen 1 [Source:HGNC Symbol;Acc:24648]	-0.287091	5.68439	11.4492	0.000715252	0.00861152
ENSG00000115275	MOGS	mannosyl-oligosaccharide glucosidase [Source:HGNC Symbol;Acc:24862]	0.379841	4.90285	11.4426	0.000717787	0.00862929
ENSG00000125912	NCLN	nicalin [Source:HGNC Symbol;Acc:26923]	0.405446	5.65342	11.4423	0.000717894	0.00862929
ENSG00000167515	TRAPPC2L	trafficking protein particle complex 2-like [Source:HGNC Symbol;Acc:30887]	0.3918	4.2914	11.4386	0.000719359	0.00863989
ENSG00000162129	CLPB	ClpB caseinolytic peptidase B homolog (E. coli) [Source:HGNC Symbol;Acc:30664]	-0.363438	4.87211	11.435	0.000720738	0.00864944
ENSG00000125630	POLR1B	polymerase (RNA) I polypeptide B, 128kDa [Source:HGNC Symbol;Acc:20454]	0.239854	6.6495	11.428	0.000723443	0.00867488
ENSG00000111731	KIAA0528	KIAA0528 [Source:HGNC Symbol;Acc:29062]	-0.257989	6.42415	11.4227	0.00072553	0.00869286
ENSG00000139645	ANKRD52	ankyrin repeat domain 52 [Source:HGNC Symbol;Acc:26614]	0.284317	6.48242	11.4175	0.000727561	0.00871014
ENSG00000132382	MYBBP1A	MYB binding protein (P160) 1a [Source:HGNC Symbol;Acc:7546]	0.32554	5.80393	11.4133	0.000729199	0.00871963
ENSG00000116030	SUMO1	SMT3 suppressor of mif two 3 homolog 1 (S. cerevisiae) [Source:HGNC Symbol;Acc:12502]	-0.215346	7.40206	11.4125	0.000729531	0.00871963
ENSG00000111012	CYP27B1	cytochrome P450, family 27, subfamily B, polypeptide 1 [Source:HGNC Symbol;Acc:2606]	0.655092	2.28982	11.403	0.000733246	0.00875697
ENSG00000110881	ASIC1	acid-sensing (proton-gated) ion channel 1 [Source:HGNC Symbol;Acc:100]	-0.527373	2.97327	11.4001	0.000734419	0.00876391
ENSG00000060656	PTPRU	protein tyrosine phosphatase, receptor type, U [Source:HGNC Symbol;Acc:9683]	-0.434462	4.11141	11.3966	0.000735771	0.00877298
ENSG00000102081	FMR1	fragile X mental retardation 1 [Source:HGNC Symbol;Acc:3775]	-0.220107	7.01062	11.393	0.000737197	0.0087829
ENSG00000137497	NUMA1	nuclear mitotic apparatus protein 1 [Source:HGNC Symbol;Acc:8059]	-0.262846	7.41702	11.3863	0.00073986	0.00880754
ENSG00000162976	PQLC3	PQ loop repeat containing 3 [Source:HGNC Symbol;Acc:28503]	-0.893011	0.621686	11.3797	0.000742491	0.00882492
ENSG00000102003	SYP	synaptophysin [Source:HGNC Symbol;Acc:11506]	0.315666	5.61356	11.3797	0.000742511	0.00882492
ENSG00000186642	PDE2A	phosphodiesterase 2A, cGMP-stimulated [Source:HGNC Symbol;Acc:8777]	-0.297514	5.82489	11.3737	0.000744924	0.00884649
ENSG00000174348	PODN	podocan [Source:HGNC Symbol;Acc:23174]	-1.16283	0.413888	11.3678	0.000747277	0.00886732
ENSG00000105953	OGDH	oxoglutarate (alpha-ketoglutarate) dehydrogenase (lipoamide) [Source:HGNC Symbol;Acc:8124]	0.323028	5.68614	11.3644	0.000748662	0.00887367
ENSG00000007520	TSR3	TSR3, 20S rRNA accumulation, homolog (S. cerevisiae) [Source:HGNC Symbol;Acc:14175]	0.512395	3.66969	11.3635	0.00074901	0.00887367
ENSG00000109674	NEIL3	nei endonuclease VIII-like 3 (E. coli) [Source:HGNC Symbol;Acc:24573]	0.352129	4.75525	11.3565	0.000751835	0.00889456
ENSG00000074201	CLNS1A	chloride channel, nucleotide-sensitive, 1A [Source:HGNC Symbol;Acc:2080]	-0.22376	7.32241	11.3562	0.000751975	0.00889456
ENSG00000138646	HERC5	HECT and RLD domain containing E3 ubiquitin protein ligase 5 [Source:HGNC Symbol;Acc:24368]	-0.481644	3.75142	11.3538	0.000752924	0.00889869
ENSG00000130669	PAK4	p21 protein (Cdc42/Rac)-activated kinase 4 [Source:HGNC Symbol;Acc:16059]	0.495944	3.82646	11.3467	0.000755824	0.00892583
ENSG00000172638	EFEMP2	EGF containing fibulin-like extracellular matrix protein 2 [Source:HGNC Symbol;Acc:3219]	-0.656664	2.09663	11.3363	0.000760077	0.00895479
ENSG00000100263	RHBDD3	rhomboid domain containing 3 [Source:HGNC Symbol;Acc:1308]	0.420728	4.36445	11.336	0.000760208	0.00895479
ENSG00000173406	DAB1	disabled homolog 1 (Drosophila) [Source:HGNC Symbol;Acc:2661]	-0.527743	3.13824	11.3357	0.00076032	0.00895479
ENSG00000116141	MARK1	MAP/microtubule affinity-regulating kinase 1 [Source:HGNC Symbol;Acc:6896]	-0.255666	6.07275	11.3348	0.000760694	0.00895479
ENSG00000137872	SEMA6D	sema domain, transmembrane domain (TM), and cytoplasmic domain, (semaphorin) 6D [Source:HGNC Symbol;Acc:16770]	-0.256796	6.06114	11.3291	0.000763039	0.00897525
ENSG00000110429	FBXO3	F-box protein 3 [Source:HGNC Symbol;Acc:13582]	-0.296395	5.5042	11.3268	0.000763985	0.00897924
ENSG00000143367	TUFT1	tuftelin 1 [Source:HGNC Symbol;Acc:12422]	-0.438031	3.9074	11.3246	0.000764863	0.00898244
ENSG00000131779	PEX11B	peroxisomal biogenesis factor 11 beta [Source:HGNC Symbol;Acc:8853]	-0.248523	6.33974	11.3194	0.000767005	0.00900045
ENSG00000204103	MAFB	v-maf musculoaponeurotic fibrosarcoma oncogene homolog B (avian) [Source:HGNC Symbol;Acc:6408]	-0.520097	3.17523	11.3169	0.000768057	0.00900567
ENSG00000173457	PPP1R14B	protein phosphatase 1, regulatory (inhibitor) subunit 14B [Source:HGNC Symbol;Acc:9057]	0.344737	5.85389	11.3085	0.000771528	0.00903921
ENSG00000185122	HSF1	heat shock transcription factor 1 [Source:HGNC Symbol;Acc:5224]	0.342521	5.01833	11.2911	0.000778785	0.00911702
ENSG00000198794	SCAMP5	secretory carrier membrane protein 5 [Source:HGNC Symbol;Acc:30386]	0.238918	7.1578	11.2772	0.000784632	0.00917822
ENSG00000176619	LMNB2	lamin B2 [Source:HGNC Symbol;Acc:6638]	0.272009	7.35949	11.2754	0.000785409	0.00918005
ENSG00000072506	HSD17B10	hydroxysteroid (17-beta) dehydrogenase 10 [Source:HGNC Symbol;Acc:4800]	0.32703	5.82561	11.2726	0.000786586	0.00918656
ENSG00000112183	RBM24	RNA binding motif protein 24 [Source:HGNC Symbol;Acc:21539]	-0.229082	6.59406	11.2709	0.000787303	0.00918768
ENSG00000215030	RPL13P12	ribosomal protein L13 pseudogene 12 [Source:HGNC Symbol;Acc:35701]	0.503569	3.72911	11.259	0.000792373	0.00923957
ENSG00000123240	OPTN	optineurin [Source:HGNC Symbol;Acc:17142]	-0.510454	3.1977	11.2501	0.000796171	0.00926369
ENSG00000180190	C8orf42	chromosome 8 open reading frame 42 [Source:HGNC Symbol;Acc:26951]	-0.380005	4.40904	11.25	0.000796232	0.00926369
ENSG00000147852	VLDLR	very low density lipoprotein receptor [Source:HGNC Symbol;Acc:12698]	0.394839	4.74986	11.2498	0.000796318	0.00926369
ENSG00000198887	SMC5	structural maintenance of chromosomes 5 [Source:HGNC Symbol;Acc:20465]	-0.223318	6.95956	11.2349	0.000802732	0.00933097
ENSG00000171310	CHST11	carbohydrate (chondroitin 4) sulfotransferase 11 [Source:HGNC Symbol;Acc:17422]	0.676382	2.5177	11.2325	0.00080376	0.00933559
ENSG00000063177	RPL18	ribosomal protein L18 [Source:HGNC Symbol;Acc:10310]	0.255075	8.43642	11.2265	0.000806358	0.00935821
ENSG00000133169	BEX1	brain expressed, X-linked 1 [Source:HGNC Symbol;Acc:1036]	-0.21397	6.96771	11.2251	0.000806971	0.00935821
ENSG00000077616	NAALAD2	N-acetylated alpha-linked acidic dipeptidase 2 [Source:HGNC Symbol;Acc:14526]	-0.378104	4.34482	11.2179	0.000810135	0.00938755
ENSG00000259205	PRKXP1	protein kinase, X-linked, pseudogene 1 [Source:HGNC Symbol;Acc:9442]	0.960155	1.4688	11.2143	0.000811696	0.00939829
ENSG00000122705	CLTA	clathrin, light chain A [Source:HGNC Symbol;Acc:2090]	0.213456	7.08524	11.2032	0.000816569	0.00944732
ENSG00000004777	ARHGAP33	Rho GTPase activating protein 33 [Source:HGNC Symbol;Acc:23085]	0.554936	2.70694	11.2016	0.00081726	0.00944794
ENSG00000185565	LSAMP	limbic system-associated membrane protein [Source:HGNC Symbol;Acc:6705]	-0.422988	4.06399	11.1899	0.00082245	0.00950052
ENSG00000020922	MRE11A	MRE11 meiotic recombination 11 homolog A (S. cerevisiae) [Source:HGNC Symbol;Acc:7230]	-0.291266	5.42323	11.1832	0.000825421	0.00952156
ENSG00000161960	EIF4A1	eukaryotic translation initiation factor 4A1 [Source:HGNC Symbol;Acc:3282]	0.169435	9.83419	11.1829	0.000825558	0.00952156
ENSG00000165943	MOAP1	modulator of apoptosis 1 [Source:HGNC Symbol;Acc:16658]	-0.297912	5.34834	11.1807	0.000826528	0.00952533
ENSG00000198892	SHISA4	shisa homolog 4 (Xenopus laevis) [Source:HGNC Symbol;Acc:27139]	1.06824	1.11475	11.1733	0.000829834	0.009556
ENSG00000064225	ST3GAL6	ST3 beta-galactoside alpha-2,3-sialyltransferase 6 [Source:HGNC Symbol;Acc:18080]	-0.363333	4.43977	11.1544	0.000838328	0.00964357
ENSG00000182004	SNRPE	small nuclear ribonucleoprotein polypeptide E [Source:HGNC Symbol;Acc:11161]	-0.217743	7.37629	11.1535	0.000838741	0.00964357
ENSG00000212719	C17orf51	chromosome 17 open reading frame 51 [Source:HGNC Symbol;Acc:27904]	0.278863	5.74479	11.1493	0.000840619	0.00965766
ENSG00000064102	ASUN	asunder, spermatogenesis regulator homolog (Drosphila) [Source:HGNC Symbol;Acc:20174]	0.306878	5.43018	11.1439	0.000843088	0.00967852
ENSG00000196177	ACADSB	acyl-CoA dehydrogenase, short/branched chain [Source:HGNC Symbol;Acc:91]	-0.316683	5.48019	11.1384	0.000845583	0.00969964
ENSG00000071894	CPSF1	cleavage and polyadenylation specific factor 1, 160kDa [Source:HGNC Symbol;Acc:2324]	0.374332	6.28301	11.1293	0.000849754	0.00973994
ENSG00000171094	ALK	anaplastic lymphoma receptor tyrosine kinase [Source:HGNC Symbol;Acc:427]	0.3686	4.37293	11.1146	0.000856494	0.00980961
ENSG00000138750	NUP54	nucleoporin 54kDa [Source:HGNC Symbol;Acc:17359]	-0.264405	6.6882	11.1097	0.000858783	0.00982822
ENSG00000242498	C15orf38	chromosome 15 open reading frame 38 [Source:HGNC Symbol;Acc:28782]	-0.433629	3.67202	11.098	0.000864196	0.00988253
ENSG00000121644	DESI2	desumoylating isopeptidase 2 [Source:HGNC Symbol;Acc:24264]	0.20968	7.5229	11.0772	0.000873962	0.0099865
ENSG00000078177	N4BP2	NEDD4 binding protein 2 [Source:HGNC Symbol;Acc:29851]	-0.292046	5.59997	11.0727	0.000876069	0.0100004
ENSG00000168970	JMJD7-PLA2G4B	JMJD7-PLA2G4B readthrough [Source:HGNC Symbol;Acc:34449]	-0.711743	1.52095	11.0716	0.000876588	0.0100004
ENSG00000074621	SLC24A1	solute carrier family 24 (sodium/potassium/calcium exchanger), member 1 [Source:HGNC Symbol;Acc:10975]	-0.448888	3.50904	11.0703	0.000877207	0.0100004
ENSG00000174437	ATP2A2	ATPase, Ca++ transporting, cardiac muscle, slow twitch 2 [Source:HGNC Symbol;Acc:812]	0.172623	9.20631	11.0507	0.000886516	0.0100949
ENSG00000225580	RP1-159M24.1		0.582097	2.69331	11.05	0.000886858	0.0100949
ENSG00000152818	UTRN	utrophin [Source:HGNC Symbol;Acc:12635]	-0.428879	3.95816	11.0426	0.000890439	0.0101254
ENSG00000137393	RNF144B	ring finger protein 144B [Source:HGNC Symbol;Acc:21578]	-0.987275	0.781978	11.0415	0.000890929	0.0101254
ENSG00000200127	Y_RNA	Y RNA [Source:RFAM;Acc:RF00019]	1.33314	0.386564	11.0402	0.000891585	0.0101254
ENSG00000196715	VKORC1L1	vitamin K epoxide reductase complex, subunit 1-like 1 [Source:HGNC Symbol;Acc:21492]	0.221011	6.75276	11.0349	0.00089413	0.0101465
ENSG00000136141	LRCH1	leucine-rich repeats and calponin homology (CH) domain containing 1 [Source:HGNC Symbol;Acc:20309]	-0.319244	5.07607	11.0302	0.000896408	0.0101645
ENSG00000065183	WDR3	WD repeat domain 3 [Source:HGNC Symbol;Acc:12755]	0.193445	8.02522	11.0237	0.000899532	0.0101922
ENSG00000130489	SCO2	SCO cytochrome oxidase deficient homolog 2 (yeast) [Source:HGNC Symbol;Acc:10604]	0.497532	3.57834	11.0202	0.000901234	0.0102037
ENSG00000171241	SHCBP1	SHC SH2-domain binding protein 1 [Source:HGNC Symbol;Acc:29547]	0.283402	5.78324	11.0074	0.000907472	0.0102644
ENSG00000179335	CLK3	CDC-like kinase 3 [Source:HGNC Symbol;Acc:2071]	0.348939	5.59393	11.0064	0.000907985	0.0102644
ENSG00000167074	TEF	thyrotrophic embryonic factor [Source:HGNC Symbol;Acc:11722]	0.448415	3.963	10.9997	0.000911252	0.0102935
ENSG00000198231	DDX42	DEAD (Asp-Glu-Ala-Asp) box polypeptide 42 [Source:HGNC Symbol;Acc:18676]	-0.204112	8.74818	10.9927	0.000914704	0.0103198
ENSG00000177595	PIDD	p53-induced death domain protein [Source:HGNC Symbol;Acc:16491]	0.522715	4.23416	10.9922	0.000914979	0.0103198
ENSG00000064601	CTSA	cathepsin A [Source:HGNC Symbol;Acc:9251]	0.361496	5.00939	10.9791	0.000921444	0.0103848
ENSG00000080503	SMARCA2	SWI/SNF related, matrix associated, actin dependent regulator of chromatin, subfamily a, member 2 [Source:HGNC Symbol;Acc:11098]	-0.36406	4.38987	10.9744	0.000923799	0.0104008
ENSG00000198722	UNC13B	unc-13 homolog B (C. elegans) [Source:HGNC Symbol;Acc:12566]	-0.261315	6.20326	10.9724	0.000924771	0.0104008
ENSG00000236104	ZBTB22	zinc finger and BTB domain containing 22 [Source:HGNC Symbol;Acc:13085]	-0.501373	2.953	10.972	0.000924968	0.0104008
ENSG00000125868	DSTN	destrin (actin depolymerizing factor) [Source:HGNC Symbol;Acc:15750]	-0.218615	7.27588	10.966	0.000927972	0.0104267
ENSG00000166398	KIAA0355	KIAA0355 [Source:HGNC Symbol;Acc:29016]	-0.317507	4.98361	10.9638	0.00092908	0.0104312
ENSG00000070759	TESK2	testis-specific kinase 2 [Source:HGNC Symbol;Acc:11732]	-0.858732	1.43798	10.9623	0.000929823	0.0104316
ENSG00000158805	ZNF276	zinc finger protein 276 [Source:HGNC Symbol;Acc:23330]	0.539216	3.28251	10.9499	0.000936077	0.0104938
ENSG00000108262	GIT1	G protein-coupled receptor kinase interacting ArfGAP 1 [Source:HGNC Symbol;Acc:4272]	0.337161	5.5326	10.9375	0.000942351	0.0105562
ENSG00000010256	UQCRC1	ubiquinol-cytochrome c reductase core protein I [Source:HGNC Symbol;Acc:12585]	0.24048	7.02317	10.936	0.000943139	0.010557
ENSG00000116127	ALMS1	Alstrom syndrome 1 [Source:HGNC Symbol;Acc:428]	-0.206706	6.97785	10.9243	0.000949131	0.0106042
ENSG00000167107	ACSF2	acyl-CoA synthetase family member 2 [Source:HGNC Symbol;Acc:26101]	-0.391742	4.65481	10.924	0.000949263	0.0106042
ENSG00000109132	PHOX2B	paired-like homeobox 2b [Source:HGNC Symbol;Acc:9143]	-0.185984	8.5707	10.9235	0.000949504	0.0106042
ENSG00000129534	MIS18BP1	MIS18 binding protein 1 [Source:HGNC Symbol;Acc:20190]	-0.242495	6.28409	10.9215	0.000950521	0.0106076
ENSG00000002549	LAP3	leucine aminopeptidase 3 [Source:HGNC Symbol;Acc:18449]	0.252567	5.9517	10.9165	0.000953107	0.0106284
ENSG00000148840	PPRC1	peroxisome proliferator-activated receptor gamma, coactivator-related 1 [Source:HGNC Symbol;Acc:30025]	0.263584	6.85861	10.9099	0.000956493	0.0106582
ENSG00000115286	NDUFS7	NADH dehydrogenase (ubiquinone) Fe-S protein 7, 20kDa (NADH-coenzyme Q reductase) [Source:HGNC Symbol;Acc:7714]	0.532444	3.13826	10.9081	0.000957425	0.0106605
ENSG00000257391	MIR3180-4	microRNA 3180-4 [Source:HGNC Symbol;Acc:38920]	1.43766	-0.285177	10.9004	0.00096144	0.0106852
ENSG00000174851	YIF1A	Yip1 interacting factor homolog A (S. cerevisiae) [Source:HGNC Symbol;Acc:16688]	0.373745	4.85997	10.9	0.000961625	0.0106852
ENSG00000187091	PLCD1	phospholipase C, delta 1 [Source:HGNC Symbol;Acc:9060]	-0.942886	0.965117	10.8997	0.000961801	0.0106852
ENSG00000177426	TGIF1	TGFB-induced factor homeobox 1 [Source:HGNC Symbol;Acc:11776]	-0.317565	5.06989	10.8959	0.000963757	0.0106989
ENSG00000166974	MAPRE2	microtubule-associated protein, RP/EB family, member 2 [Source:HGNC Symbol;Acc:6891]	0.242916	6.20554	10.8931	0.000965257	0.0107075
ENSG00000142700	DMRTA2	DMRT-like family A2 [Source:HGNC Symbol;Acc:13908]	-2.00042	-0.748865	10.8801	0.000972049	0.0107748
ENSG00000068078	FGFR3	fibroblast growth factor receptor 3 [Source:HGNC Symbol;Acc:3690]	-0.49413	2.97615	10.8725	0.000976015	0.0108106
ENSG00000173275	ZNF449	zinc finger protein 449 [Source:HGNC Symbol;Acc:21039]	-0.43392	3.55502	10.8554	0.000985093	0.010903
ENSG00000108176	DNAJC12	DnaJ (Hsp40) homolog, subfamily C, member 12 [Source:HGNC Symbol;Acc:28908]	-0.349432	5.02875	10.8441	0.000991127	0.0109616
ENSG00000234493	GS1-421I3.2		-1.01746	0.0215295	10.8394	0.000993603	0.0109808
ENSG00000158458	NRG2	neuregulin 2 [Source:HGNC Symbol;Acc:7998]	-1.17766	0.641318	10.8214	0.00100336	0.0110804
ENSG00000153666	GOLGA8IP	golgin A8 family, member I, pseudogene [Source:HGNC Symbol;Acc:26660]	-0.486965	2.91491	10.8198	0.00100421	0.0110815
ENSG00000122477	LRRC39	leucine rich repeat containing 39 [Source:HGNC Symbol;Acc:28228]	-0.831859	1.47626	10.8161	0.00100623	0.0110877
ENSG00000183762	KREMEN1	kringle containing transmembrane protein 1 [Source:HGNC Symbol;Acc:17550]	-0.201261	7.88488	10.816	0.00100627	0.0110877
ENSG00000099821	POLRMT	polymerase (RNA) mitochondrial (DNA directed) [Source:HGNC Symbol;Acc:9200]	0.433045	5.0875	10.8129	0.00100795	0.0110979
ENSG00000116161	CACYBP	calcyclin binding protein [Source:HGNC Symbol;Acc:30423]	0.200598	8.0839	10.8103	0.00100935	0.0111051
ENSG00000144642	RBMS3	RNA binding motif, single stranded interacting protein 3 [Source:HGNC Symbol;Acc:13427]	-0.259222	5.87222	10.798	0.00101607	0.0111708
ENSG00000128272	ATF4	activating transcription factor 4 (tax-responsive enhancer element B67) [Source:HGNC Symbol;Acc:786]	0.218934	8.52363	10.7936	0.0010185	0.0111891
ENSG00000108829	LRRC59	leucine rich repeat containing 59 [Source:HGNC Symbol;Acc:28817]	0.191001	8.28119	10.7882	0.00102147	0.0112135
ENSG00000113638	TTC33	tetratricopeptide repeat domain 33 [Source:HGNC Symbol;Acc:29959]	-0.380183	4.35276	10.7831	0.00102431	0.0112363
ENSG00000171097	CCBL1	cysteine conjugate-beta lyase, cytoplasmic [Source:HGNC Symbol;Acc:1564]	0.549491	3.06517	10.7772	0.0010276	0.011264
ENSG00000186174	BCL9L	B-cell CLL/lymphoma 9-like [Source:HGNC Symbol;Acc:23688]	0.498804	3.84754	10.7648	0.00103451	0.0113314
ENSG00000258429	PDF	peptide deformylase (mitochondrial) [Source:HGNC Symbol;Acc:30012]	1.29744	0.0648807	10.7606	0.00103681	0.0113482
ENSG00000112208	BAG2	BCL2-associated athanogene 2 [Source:HGNC Symbol;Acc:938]	0.278298	5.76911	10.7569	0.00103891	0.011362
ENSG00000172613	RAD9A	RAD9 homolog A (S. pombe) [Source:HGNC Symbol;Acc:9827]	0.488565	3.29348	10.7552	0.00103987	0.011362
ENSG00000187372	PCDHB13	protocadherin beta 13 [Source:HGNC Symbol;Acc:8684]	-0.607188	2.49213	10.7529	0.00104118	0.011362
ENSG00000164118	CEP44	centrosomal protein 44kDa [Source:HGNC Symbol;Acc:29356]	-0.201492	8.18935	10.7523	0.00104152	0.011362
ENSG00000011523	CEP68	centrosomal protein 68kDa [Source:HGNC Symbol;Acc:29076]	-0.266754	5.87287	10.7516	0.00104191	0.011362
ENSG00000164107	HAND2	heart and neural crest derivatives expressed 2 [Source:HGNC Symbol;Acc:4808]	0.218308	8.21437	10.7417	0.00104751	0.0114123
ENSG00000077809	GTF2I	general transcription factor IIi [Source:HGNC Symbol;Acc:4659]	-0.182297	8.62317	10.7407	0.00104806	0.0114123
ENSG00000227057	WDR46	WD repeat domain 46 [Source:HGNC Symbol;Acc:13923]	0.311915	5.76585	10.7371	0.0010501	0.0114261
ENSG00000130811	EIF3G	eukaryotic translation initiation factor 3, subunit G [Source:HGNC Symbol;Acc:3274]	0.31598	6.08585	10.7319	0.00105302	0.0114495
ENSG00000107833	NPM3	nucleophosmin/nucleoplasmin 3 [Source:HGNC Symbol;Acc:7931]	0.334064	5.0413	10.7236	0.0010578	0.011493
ENSG00000234297	RP11-54D18.4		-0.497766	2.86745	10.7181	0.00106091	0.0115183
ENSG00000055147	FAM114A2	family with sequence similarity 114, member A2 [Source:HGNC Symbol;Acc:1333]	-0.331336	4.9833	10.6927	0.00107559	0.0116625
ENSG00000169814	BTD	biotinidase [Source:HGNC Symbol;Acc:1122]	-0.580888	2.11346	10.6924	0.00107576	0.0116625
ENSG00000168890	TMEM150A	transmembrane protein 150A [Source:HGNC Symbol;Acc:24677]	0.640735	2.40294	10.6834	0.00108103	0.0117033
ENSG00000176058	TPRN	taperin [Source:HGNC Symbol;Acc:26894]	0.530148	3.62146	10.6832	0.00108111	0.0117033
ENSG00000154736	ADAMTS5	ADAM metallopeptidase with thrombospondin type 1 motif, 5 [Source:HGNC Symbol;Acc:221]	-0.276308	5.54361	10.6737	0.00108671	0.0117553
ENSG00000182359	KBTBD3	kelch repeat and BTB (POZ) domain containing 3 [Source:HGNC Symbol;Acc:22934]	-1.09601	0.344349	10.6591	0.00109533	0.0118399
ENSG00000162889	MAPKAPK2	mitogen-activated protein kinase-activated protein kinase 2 [Source:HGNC Symbol;Acc:6887]	-0.280794	5.82996	10.6575	0.00109628	0.0118416
ENSG00000166482	MFAP4	microfibrillar-associated protein 4 [Source:HGNC Symbol;Acc:7035]	-0.235903	7.37603	10.6539	0.0010984	0.0118559
ENSG00000126062	TMEM115	transmembrane protein 115 [Source:HGNC Symbol;Acc:30055]	0.529127	3.72965	10.6465	0.00110282	0.0118949
ENSG00000197355	UAP1L1	UDP-N-acteylglucosamine pyrophosphorylase 1-like 1 [Source:HGNC Symbol;Acc:28082]	0.455731	3.95603	10.6403	0.00110653	0.0119262
ENSG00000115468	EFHD1	EF-hand domain family, member D1 [Source:HGNC Symbol;Acc:29556]	-0.514126	2.63303	10.6374	0.00110825	0.0119361
ENSG00000149806	FAU	Finkel-Biskis-Reilly murine sarcoma virus (FBR-MuSV) ubiquitously expressed [Source:HGNC Symbol;Acc:3597]	0.279633	7.1156	10.6289	0.00111336	0.0119824
ENSG00000143162	CREG1	cellular repressor of E1A-stimulated genes 1 [Source:HGNC Symbol;Acc:2351]	-0.368824	4.64951	10.6192	0.00111917	0.0120351
ENSG00000100297	MCM5	minichromosome maintenance complex component 5 [Source:HGNC Symbol;Acc:6948]	-0.30877	5.99372	10.6181	0.00111988	0.0120351
ENSG00000071859	FAM50A	family with sequence similarity 50, member A [Source:HGNC Symbol;Acc:18786]	0.266613	5.99772	10.6125	0.00112325	0.0120625
ENSG00000105771	SMG9	smg-9 homolog, nonsense mediated mRNA decay factor (C. elegans) [Source:HGNC Symbol;Acc:25763]	0.405277	4.31772	10.609	0.00112539	0.0120767
ENSG00000203485	INF2	inverted formin, FH2 and WH2 domain containing [Source:HGNC Symbol;Acc:23791]	0.385348	4.44412	10.597	0.00113274	0.0121468
ENSG00000204186	ZDBF2	zinc finger, DBF-type containing 2 [Source:HGNC Symbol;Acc:29313]	-0.227348	6.58206	10.5927	0.00113537	0.0121662
ENSG00000197054	ZNF763	zinc finger protein 763 [Source:HGNC Symbol;Acc:27614]	-1.03926	0.597424	10.5878	0.00113839	0.0121897
ENSG00000239900	ADSL	adenylosuccinate lyase [Source:HGNC Symbol;Acc:291]	0.209077	6.98215	10.5848	0.00114022	0.0122005
ENSG00000154803	FLCN	folliculin [Source:HGNC Symbol;Acc:27310]	0.330274	5.12554	10.5744	0.00114663	0.012248
ENSG00000148200	NR6A1	nuclear receptor subfamily 6, group A, member 1 [Source:HGNC Symbol;Acc:7985]	0.481982	3.37505	10.5736	0.00114713	0.012248
ENSG00000100207	TCF20	transcription factor 20 (AR1) [Source:HGNC Symbol;Acc:11631]	-0.242316	6.42559	10.5736	0.00114714	0.012248
ENSG00000154059	IMPACT	Impact homolog (mouse) [Source:HGNC Symbol;Acc:20387]	-0.382953	4.74441	10.5717	0.00114833	0.0122519
ENSG00000138757	G3BP2	GTPase activating protein (SH3 domain) binding protein 2 [Source:HGNC Symbol;Acc:30291]	-0.191458	8.65816	10.5702	0.00114923	0.0122527
ENSG00000213593	TMX2	thioredoxin-related transmembrane protein 2 [Source:HGNC Symbol;Acc:30739]	0.209668	6.9233	10.5645	0.00115282	0.0122821
ENSG00000134352	IL6ST	interleukin 6 signal transducer (gp130, oncostatin M receptor) [Source:HGNC Symbol;Acc:6021]	-0.24207	6.44126	10.5618	0.00115448	0.0122909
ENSG00000100591	AHSA1	AHA1, activator of heat shock 90kDa protein ATPase homolog 1 (yeast) [Source:HGNC Symbol;Acc:1189]	0.20992	7.43143	10.5527	0.00116021	0.012343
ENSG00000181817	LSM10	LSM10, U7 small nuclear RNA associated [Source:HGNC Symbol;Acc:17562]	0.468993	3.77264	10.5502	0.00116176	0.0123507
ENSG00000187714	SLC18A3	solute carrier family 18 (vesicular acetylcholine), member 3 [Source:HGNC Symbol;Acc:10936]	-0.809778	1.32913	10.5481	0.00116309	0.0123559
ENSG00000154305	MIA3	melanoma inhibitory activity family, member 3 [Source:HGNC Symbol;Acc:24008]	-0.204648	7.44437	10.5445	0.00116536	0.0123712
ENSG00000139174	PRICKLE1	prickle homolog 1 (Drosophila) [Source:HGNC Symbol;Acc:17019]	-0.453813	3.48728	10.5391	0.00116872	0.012398
ENSG00000062822	POLD1	polymerase (DNA directed), delta 1, catalytic subunit [Source:HGNC Symbol;Acc:9175]	0.389182	5.19546	10.5368	0.00117021	0.0124049
ENSG00000232430	AC105396.3		2.86722	-0.838432	10.5333	0.0011724	0.0124192
ENSG00000135837	CEP350	centrosomal protein 350kDa [Source:HGNC Symbol;Acc:24238]	-0.184424	7.97756	10.5306	0.00117413	0.0124286
ENSG00000133083	DCLK1	doublecortin-like kinase 1 [Source:HGNC Symbol;Acc:2700]	-0.376618	4.69088	10.5263	0.00117689	0.012449
ENSG00000121653	MAPK8IP1	mitogen-activated protein kinase 8 interacting protein 1 [Source:HGNC Symbol;Acc:6882]	0.481523	3.89425	10.5235	0.00117869	0.0124591
ENSG00000106078	COBL	cordon-bleu homolog (mouse) [Source:HGNC Symbol;Acc:22199]	-1.10453	0.556139	10.5142	0.00118458	0.0125125
ENSG00000136653	RASSF5	Ras association (RalGDS/AF-6) domain family member 5 [Source:HGNC Symbol;Acc:17609]	-1.44227	-0.511949	10.5107	0.00118688	0.0125249
ENSG00000167967	E4F1	E4F transcription factor 1 [Source:HGNC Symbol;Acc:3121]	0.485221	4.20217	10.5098	0.00118746	0.0125249
ENSG00000137274	BPHL	biphenyl hydrolase-like (serine hydrolase) [Source:HGNC Symbol;Acc:1094]	-0.425469	3.51191	10.4797	0.0012069	0.012721
ENSG00000147257	GPC3	glypican 3 [Source:HGNC Symbol;Acc:4451]	-0.57812	2.53332	10.4764	0.00120906	0.0127347
ENSG00000206573	RP11-58B17.1		-0.273962	5.60134	10.4618	0.00121867	0.0128211
ENSG00000166311	SMPD1	sphingomyelin phosphodiesterase 1, acid lysosomal [Source:HGNC Symbol;Acc:11120]	0.730089	2.07825	10.4613	0.001219	0.0128211
ENSG00000057704	TMCC3	transmembrane and coiled-coil domain family 3 [Source:HGNC Symbol;Acc:29199]	-0.699687	2.10545	10.4523	0.00122495	0.0128746
ENSG00000094975	SUCO	SUN domain containing ossification factor [Source:HGNC Symbol;Acc:1240]	-0.198952	7.35597	10.4489	0.00122723	0.0128894
ENSG00000141994	DUS3L	dihydrouridine synthase 3-like (S. cerevisiae) [Source:HGNC Symbol;Acc:26920]	0.441949	4.27282	10.4374	0.0012349	0.0129607
ENSG00000204859	ZBTB48	zinc finger and BTB domain containing 48 [Source:HGNC Symbol;Acc:4930]	0.582567	2.9713	10.4341	0.00123708	0.0129744
ENSG00000198912	C1orf174	chromosome 1 open reading frame 174 [Source:HGNC Symbol;Acc:27915]	0.386705	4.1585	10.4252	0.00124305	0.0130278
ENSG00000138735	PDE5A	phosphodiesterase 5A, cGMP-specific [Source:HGNC Symbol;Acc:8784]	-0.254299	6.10268	10.4187	0.00124747	0.0130649
ENSG00000166831	RBPMS2	RNA binding protein with multiple splicing 2 [Source:HGNC Symbol;Acc:19098]	-0.859619	1.17108	10.4127	0.0012515	0.0130979
ENSG00000047230	CTPS2	CTP synthase 2 [Source:HGNC Symbol;Acc:2520]	-0.25999	5.83652	10.3826	0.00127212	0.013297
ENSG00000213903	LTB4R	leukotriene B4 receptor [Source:HGNC Symbol;Acc:6713]	0.45755	3.87184	10.3818	0.00127265	0.013297
ENSG00000149313	AASDHPPT	aminoadipate-semialdehyde dehydrogenase-phosphopantetheinyl transferase [Source:HGNC Symbol;Acc:14235]	-0.23483	6.87124	10.381	0.00127322	0.013297
ENSG00000168092	PAFAH1B2	platelet-activating factor acetylhydrolase 1b, catalytic subunit 2 (30kDa) [Source:HGNC Symbol;Acc:8575]	-0.236944	6.33903	10.3624	0.00128609	0.0134219
ENSG00000153443	FAM100A	family with sequence similarity 100, member A [Source:HGNC Symbol;Acc:29576]	-0.529254	3.02807	10.3481	0.00129605	0.0135163
ENSG00000105063	PPP6R1	protein phosphatase 6, regulatory subunit 1 [Source:HGNC Symbol;Acc:29195]	0.294766	6.12805	10.3422	0.00130026	0.0135507
ENSG00000239521	GATS		-0.46525	3.51523	10.3376	0.00130345	0.0135744
ENSG00000122779	TRIM24	tripartite motif containing 24 [Source:HGNC Symbol;Acc:11812]	-0.201874	7.31065	10.3353	0.00130507	0.0135818
ENSG00000029534	ANK1	ankyrin 1, erythrocytic [Source:HGNC Symbol;Acc:492]	-0.706634	1.98429	10.3277	0.00131049	0.0136224
ENSG00000070423	RNF126	ring finger protein 126 [Source:HGNC Symbol;Acc:21151]	0.43233	4.02849	10.3272	0.00131082	0.0136224
ENSG00000130165	ELOF1	elongation factor 1 homolog (S. cerevisiae) [Source:HGNC Symbol;Acc:28691]	0.400574	4.79245	10.3167	0.00131834	0.0136734
ENSG00000183458	RP11-958N24.1		1.30508	-0.0102758	10.3166	0.00131839	0.0136734
ENSG00000011426	ANLN	anillin, actin binding protein [Source:HGNC Symbol;Acc:14082]	0.216998	7.01765	10.3165	0.00131849	0.0136734
ENSG00000143067	ZNF697	zinc finger protein 697 [Source:HGNC Symbol;Acc:32034]	0.29825	5.2562	10.3128	0.0013211	0.0136908
ENSG00000117020	AKT3	v-akt murine thymoma viral oncogene homolog 3 (protein kinase B, gamma) [Source:HGNC Symbol;Acc:393]	-0.189588	7.61116	10.3071	0.0013252	0.0137145
ENSG00000108518	PFN1	profilin 1 [Source:HGNC Symbol;Acc:8881]	0.223402	7.82566	10.307	0.00132524	0.0137145
ENSG00000189056	RELN	reelin [Source:HGNC Symbol;Acc:9957]	0.207174	7.12588	10.3011	0.00132954	0.0137495
ENSG00000026652	AGPAT4	1-acylglycerol-3-phosphate O-acyltransferase 4 (lysophosphatidic acid acyltransferase, delta) [Source:HGNC Symbol;Acc:20885]	-0.247047	6.16861	10.2991	0.00133096	0.0137545
ENSG00000160200	CBS	cystathionine-beta-synthase [Source:HGNC Symbol;Acc:1550]	0.261403	7.97769	10.2952	0.00133374	0.0137736
ENSG00000166710	B2M	beta-2-microglobulin [Source:HGNC Symbol;Acc:914]	-0.208547	7.81871	10.2853	0.00134091	0.0138318
ENSG00000157570	TSPAN18	tetraspanin 18 [Source:HGNC Symbol;Acc:20660]	-0.29274	5.76164	10.2849	0.00134124	0.0138318
ENSG00000119812	FAM98A	family with sequence similarity 98, member A [Source:HGNC Symbol;Acc:24520]	0.235248	6.19639	10.2802	0.00134464	0.0138572
ENSG00000196139	AKR1C3	aldo-keto reductase family 1, member C3 (3-alpha hydroxysteroid dehydrogenase, type II) [Source:HGNC Symbol;Acc:386]	-1.63555	1.10248	10.2747	0.00134868	0.0138843
ENSG00000122406	RPL5	ribosomal protein L5 [Source:HGNC Symbol;Acc:10360]	0.151977	10.7352	10.274	0.00134915	0.0138843
ENSG00000113391	FAM172A	family with sequence similarity 172, member A [Source:HGNC Symbol;Acc:25365]	-0.364214	4.47335	10.2666	0.00135463	0.0139192
ENSG00000135317	SNX14	sorting nexin 14 [Source:HGNC Symbol;Acc:14977]	-0.292444	5.57701	10.2656	0.00135532	0.0139192
ENSG00000137575	SDCBP	syndecan binding protein (syntenin) [Source:HGNC Symbol;Acc:10662]	-0.213297	7.15319	10.2645	0.00135613	0.0139192
ENSG00000089248	ERP29	endoplasmic reticulum protein 29 [Source:HGNC Symbol;Acc:13799]	0.235177	6.45919	10.2643	0.00135629	0.0139192
ENSG00000225210	AL589743.1		-0.321443	5.44036	10.2574	0.0013614	0.0139619
ENSG00000081386	ZNF510	zinc finger protein 510 [Source:HGNC Symbol;Acc:29161]	-0.260361	5.91449	10.2391	0.00137493	0.0140909
ENSG00000115993	TRAK2	trafficking protein, kinesin binding 2 [Source:HGNC Symbol;Acc:13206]	0.223442	6.6009	10.2293	0.00138224	0.0141491
ENSG00000134815	DHX34	DEAH (Asp-Glu-Ala-His) box polypeptide 34 [Source:HGNC Symbol;Acc:16719]	0.41598	4.47069	10.2279	0.0013833	0.0141491
ENSG00000188681	MAFIPL		0.442773	3.87213	10.2277	0.00138347	0.0141491
ENSG00000121058	COIL	coilin [Source:HGNC Symbol;Acc:2184]	-0.219352	6.56177	10.2214	0.00138819	0.0141875
ENSG00000110841	PPFIBP1	PTPRF interacting protein, binding protein 1 (liprin beta 1) [Source:HGNC Symbol;Acc:9249]	-0.269007	5.76762	10.2056	0.00140011	0.0142995
ENSG00000178567	EPM2AIP1	EPM2A (laforin) interacting protein 1 [Source:HGNC Symbol;Acc:19735]	-0.207096	6.97824	10.1907	0.00141147	0.0144056
ENSG00000196233	LCOR	ligand dependent nuclear receptor corepressor [Source:HGNC Symbol;Acc:29503]	-0.207424	7.32436	10.1826	0.00141775	0.0144371
ENSG00000181924	CHCHD8	coiled-coil-helix-coiled-coil-helix domain containing 8 [Source:HGNC Symbol;Acc:24604]	0.260934	5.84541	10.182	0.00141817	0.0144371
ENSG00000058866	DGKG	diacylglycerol kinase, gamma 90kDa [Source:HGNC Symbol;Acc:2853]	-1.27791	-0.23571	10.1817	0.00141841	0.0144371
ENSG00000119711	ALDH6A1	aldehyde dehydrogenase 6 family, member A1 [Source:HGNC Symbol;Acc:7179]	-0.368432	4.19258	10.1816	0.00141846	0.0144371
ENSG00000113389	NPR3	natriuretic peptide receptor C/guanylate cyclase C (atrionatriuretic peptide receptor C) [Source:HGNC Symbol;Acc:7945]	1.09321	3.07991	10.1698	0.00142759	0.0145201
ENSG00000127337	YEATS4	YEATS domain containing 4 [Source:HGNC Symbol;Acc:24859]	-0.29015	5.81852	10.159	0.00143598	0.0145954
ENSG00000075702	WDR62	WD repeat domain 62 [Source:HGNC Symbol;Acc:24502]	0.365861	4.70524	10.149	0.00144376	0.0146643
ENSG00000064932	SBNO2	strawberry notch homolog 2 (Drosophila) [Source:HGNC Symbol;Acc:29158]	0.435244	4.45855	10.1234	0.00146401	0.0148599
ENSG00000124596	C6orf130	chromosome 6 open reading frame 130 [Source:HGNC Symbol;Acc:21257]	-0.351219	4.9621	10.119	0.00146752	0.0148817
ENSG00000113657	DPYSL3	dihydropyrimidinase-like 3 [Source:HGNC Symbol;Acc:3015]	-0.196912	7.21218	10.1181	0.00146817	0.0148817
ENSG00000143947	RPS27A	ribosomal protein S27a [Source:HGNC Symbol;Acc:10417]	0.171921	8.9677	10.1156	0.0014702	0.0148921
ENSG00000253626	EIF5AL1	eukaryotic translation initiation factor 5A-like 1 [Source:HGNC Symbol;Acc:17419]	0.508394	3.01176	10.1136	0.00147182	0.0148983
ENSG00000226864	RP11-500G22.2		1.55352	-0.110314	10.103	0.0014803	0.0149685
ENSG00000157020	SEC13	SEC13 homolog (S. cerevisiae) [Source:HGNC Symbol;Acc:10697]	0.236414	6.32623	10.1011	0.0014818	0.0149685
ENSG00000213672	NCKIPSD	NCK interacting protein with SH3 domain [Source:HGNC Symbol;Acc:15486]	0.408455	3.84732	10.1007	0.0014821	0.0149685
ENSG00000158161	EYA3	eyes absent homolog 3 (Drosophila) [Source:HGNC Symbol;Acc:3521]	0.261925	6.07749	10.0999	0.0014828	0.0149685
ENSG00000187605	TET3	tet methylcytosine dioxygenase 3 [Source:HGNC Symbol;Acc:28313]	0.369114	5.33471	10.0904	0.00149047	0.0150286
ENSG00000151136	BTBD11	BTB (POZ) domain containing 11 [Source:HGNC Symbol;Acc:23844]	-1.10112	0.103314	10.0892	0.00149138	0.0150286
ENSG00000165061	ZMAT4	zinc finger, matrin-type 4 [Source:HGNC Symbol;Acc:25844]	-0.762082	1.24146	10.0887	0.0014918	0.0150286
ENSG00000148400	NOTCH1	notch 1 [Source:HGNC Symbol;Acc:7881]	0.331913	5.80797	10.0864	0.00149365	0.015037
ENSG00000120616	EPC1	enhancer of polycomb homolog 1 (Drosophila) [Source:HGNC Symbol;Acc:19876]	-0.249085	6.0557	10.0847	0.00149507	0.0150411
ENSG00000117616	C1orf63	chromosome 1 open reading frame 63 [Source:HGNC Symbol;Acc:25234]	0.313403	6.30718	10.0829	0.00149649	0.0150452
ENSG00000176887	SOX11	SRY (sex determining region Y)-box 11 [Source:HGNC Symbol;Acc:11191]	-0.181197	8.54723	10.0797	0.00149914	0.0150616
ENSG00000197149	RP11-452G18.2		0.794099	1.87401	10.0636	0.00151229	0.0151834
ENSG00000004866	ST7	suppression of tumorigenicity 7 [Source:HGNC Symbol;Acc:11351]	0.328762	4.71695	10.0525	0.00152144	0.0152649
ENSG00000173757	STAT5B	signal transducer and activator of transcription 5B [Source:HGNC Symbol;Acc:11367]	-0.219934	6.46901	10.0487	0.00152459	0.0152861
ENSG00000137203	TFAP2A	transcription factor AP-2 alpha (activating enhancer binding protein 2 alpha) [Source:HGNC Symbol;Acc:11742]	0.350425	4.52629	10.0445	0.001528	0.0153033
ENSG00000234722	AC073236.3		0.728096	2.51924	10.0441	0.00152837	0.0153033
ENSG00000111206	FOXM1	forkhead box M1 [Source:HGNC Symbol;Acc:3818]	0.243913	6.41316	10.0423	0.00152986	0.0153079
ENSG00000213553	RPLP0P6	ribosomal protein, large, P0 pseudogene 6 [Source:HGNC Symbol;Acc:36404]	0.299748	5.13557	10.0369	0.00153439	0.0153429
ENSG00000095319	NUP188	nucleoporin 188kDa [Source:HGNC Symbol;Acc:17859]	0.201651	7.79091	10.0329	0.00153772	0.0153658
ENSG00000100280	AP1B1	adaptor-related protein complex 1, beta 1 subunit [Source:HGNC Symbol;Acc:554]	0.28837	5.64046	10.0289	0.00154107	0.0153888
ENSG00000135144	DTX1	deltex homolog 1 (Drosophila) [Source:HGNC Symbol;Acc:3060]	-0.608811	2.86128	10.0256	0.00154381	0.0154058
ENSG00000134222	PSRC1	proline/serine-rich coiled-coil 1 [Source:HGNC Symbol;Acc:24472]	0.322037	5.46742	10.0234	0.0015456	0.0154133
ENSG00000149177	PTPRJ	protein tyrosine phosphatase, receptor type, J [Source:HGNC Symbol;Acc:9673]	-0.874145	1.21281	10.0179	0.00155022	0.015444
ENSG00000066322	ELOVL1	ELOVL fatty acid elongase 1 [Source:HGNC Symbol;Acc:14418]	0.362003	4.48896	10.0173	0.00155076	0.015444
ENSG00000246528	RP11-159H10.3		-0.937148	0.621971	10.0154	0.00155239	0.0154498
ENSG00000149541	B3GAT3	beta-1,3-glucuronyltransferase 3 (glucuronosyltransferase I) [Source:HGNC Symbol;Acc:923]	0.41549	3.69222	10.0117	0.0015555	0.0154704
ENSG00000159023	EPB41	erythrocyte membrane protein band 4.1 (elliptocytosis 1, RH-linked) [Source:HGNC Symbol;Acc:3377]	-0.18566	7.73772	10.0039	0.00156213	0.0155259
ENSG00000099974	DDTL	D-dopachrome tautomerase-like [Source:HGNC Symbol;Acc:33446]	-0.695096	1.67228	10.0009	0.00156462	0.0155402
ENSG00000183798	EMILIN3	elastin microfibril interfacer 3 [Source:HGNC Symbol;Acc:16123]	-0.663809	1.70313	9.99146	0.00157268	0.0156098
ENSG00000122547	EEPD1	endonuclease/exonuclease/phosphatase family domain containing 1 [Source:HGNC Symbol;Acc:22223]	0.398376	4.3041	9.98924	0.00157458	0.0156182
ENSG00000101493	ZNF516	zinc finger protein 516 [Source:HGNC Symbol;Acc:28990]	-0.292444	5.58383	9.97563	0.00158625	0.0157234
ENSG00000187325	TAF9B	TAF9B RNA polymerase II, TATA box binding protein (TBP)-associated factor, 31kDa [Source:HGNC Symbol;Acc:17306]	-0.282433	5.548	9.96632	0.0015943	0.0157926
ENSG00000260124	RP4-791K14.2		-0.750087	1.94571	9.96121	0.00159873	0.015819
ENSG00000151876	FBXO4	F-box protein 4 [Source:HGNC Symbol;Acc:13583]	-0.910267	0.879042	9.96079	0.0015991	0.015819
ENSG00000181904	C5orf24	chromosome 5 open reading frame 24 [Source:HGNC Symbol;Acc:26746]	-0.209332	7.55171	9.94977	0.00160869	0.0159033
ENSG00000100836	PABPN1	poly(A) binding protein, nuclear 1 [Source:HGNC Symbol;Acc:8565]	0.241966	6.67859	9.93063	0.00162551	0.0160589
ENSG00000102225	CDK16	cyclin-dependent kinase 16 [Source:HGNC Symbol;Acc:8749]	0.252694	6.26561	9.92274	0.00163249	0.0161171
ENSG00000260923	AC137934.1		-0.758856	1.78292	9.91727	0.00163735	0.0161543
ENSG00000169071	ROR2	receptor tyrosine kinase-like orphan receptor 2 [Source:HGNC Symbol;Acc:10257]	0.763311	1.76535	9.9061	0.00164732	0.0162418
ENSG00000242992	FTH1P4	ferritin, heavy polypeptide 1 pseudogene 4 [Source:HGNC Symbol;Acc:3991]	1.24375	-0.437516	9.90461	0.00164866	0.0162441
ENSG00000135519	KCNH3	potassium voltage-gated channel, subfamily H (eag-related), member 3 [Source:HGNC Symbol;Acc:6252]	1.13376	0.148023	9.8934	0.00165872	0.0163325
ENSG00000140157	NIPA2	non imprinted in Prader-Willi/Angelman syndrome 2 [Source:HGNC Symbol;Acc:17044]	0.229606	6.2275	9.8849	0.00166641	0.0163972
ENSG00000095739	BAMBI	BMP and activin membrane-bound inhibitor homolog (Xenopus laevis) [Source:HGNC Symbol;Acc:30251]	-0.410358	4.05232	9.87932	0.00167147	0.0164296
ENSG00000132376	INPP5K	inositol polyphosphate-5-phosphatase K [Source:HGNC Symbol;Acc:33882]	-0.400346	3.94477	9.87882	0.00167192	0.0164296
ENSG00000143127	ITGA10	integrin, alpha 10 [Source:HGNC Symbol;Acc:6135]	1.47322	0.0600798	9.8754	0.00167504	0.0164493
ENSG00000176101	SSNA1	Sjogren syndrome nuclear autoantigen 1 [Source:HGNC Symbol;Acc:11321]	0.393398	4.67128	9.87342	0.00167684	0.0164516
ENSG00000166435	XRRA1	X-ray radiation resistance associated 1 [Source:HGNC Symbol;Acc:18868]	0.432671	3.72422	9.87271	0.00167749	0.0164516
ENSG00000140199	SLC12A6	solute carrier family 12 (potassium/chloride transporters), member 6 [Source:HGNC Symbol;Acc:10914]	-0.401763	4.11839	9.86724	0.00168248	0.0164897
ENSG00000196628	TCF4	transcription factor 4 [Source:HGNC Symbol;Acc:11634]	-0.17248	8.97343	9.85879	0.00169022	0.0165546
ENSG00000260838	RP11-531A24.3		-0.32747	5.03334	9.84552	0.00170246	0.0166582
ENSG00000103657	HERC1	HECT and RLD domain containing E3 ubiquitin protein ligase family member 1 [Source:HGNC Symbol;Acc:4867]	-0.191741	7.60439	9.84488	0.00170305	0.0166582
ENSG00000108813	DLX4	distal-less homeobox 4 [Source:HGNC Symbol;Acc:2917]	-0.489132	3.28428	9.8429	0.00170488	0.0166651
ENSG00000113196	HAND1	heart and neural crest derivatives expressed 1 [Source:HGNC Symbol;Acc:4807]	-0.26374	5.99698	9.83937	0.00170816	0.0166768
ENSG00000140299	BNIP2	BCL2/adenovirus E1B 19kDa interacting protein 2 [Source:HGNC Symbol;Acc:1083]	-0.227053	7.09503	9.83918	0.00170833	0.0166768
ENSG00000228505	AC011897.2		-0.184288	7.75189	9.83197	0.00171504	0.0167313
ENSG00000161091	MFSD12	major facilitator superfamily domain containing 12 [Source:HGNC Symbol;Acc:28299]	0.410207	4.13622	9.82208	0.00172429	0.0168104
ENSG00000113851	CRBN	cereblon [Source:HGNC Symbol;Acc:30185]	-0.254067	5.87953	9.81968	0.00172655	0.0168213
ENSG00000125503	PPP1R12C	protein phosphatase 1, regulatory subunit 12C [Source:HGNC Symbol;Acc:14947]	0.445074	4.59249	9.81452	0.0017314	0.0168575
ENSG00000112110	MRPL18	mitochondrial ribosomal protein L18 [Source:HGNC Symbol;Acc:14477]	0.266986	6.10634	9.80911	0.0017365	0.016896
ENSG00000110328	GALNTL4	UDP-N-acetyl-alpha-D-galactosamine:polypeptide N-acetylgalactosaminyltransferase-like 4 [Source:HGNC Symbol;Acc:30488]	0.646622	2.33812	9.79607	0.00174885	0.0170029
ENSG00000135404	CD63	CD63 molecule [Source:HGNC Symbol;Acc:1692]	0.220913	7.25394	9.79509	0.00174978	0.0170029
ENSG00000182796	TMEM198B	transmembrane protein 198B, pseudogene [Source:HGNC Symbol;Acc:43629]	-0.73231	1.50883	9.79376	0.00175105	0.0170041
ENSG00000136100	VPS36	vacuolar protein sorting 36 homolog (S. cerevisiae) [Source:HGNC Symbol;Acc:20312]	-0.227813	6.5023	9.78423	0.00176015	0.0170813
ENSG00000180879	SSR4	signal sequence receptor, delta [Source:HGNC Symbol;Acc:11326]	0.261486	6.321	9.78224	0.00176206	0.0170863
ENSG00000163686	ABHD6	abhydrolase domain containing 6 [Source:HGNC Symbol;Acc:21398]	0.423448	3.7858	9.78128	0.00176297	0.0170863
ENSG00000166579	NDEL1	nudE nuclear distribution E homolog (A. nidulans)-like 1 [Source:HGNC Symbol;Acc:17620]	0.310683	4.91128	9.77813	0.001766	0.0171044
ENSG00000154518	ATP5G3	ATP synthase, H+ transporting, mitochondrial Fo complex, subunit C3 (subunit 9) [Source:HGNC Symbol;Acc:843]	0.179184	8.15336	9.77463	0.00176936	0.017123
ENSG00000159256	MORC3	MORC family CW-type zinc finger 3 [Source:HGNC Symbol;Acc:23572]	-0.268145	5.91529	9.77373	0.00177023	0.017123
ENSG00000115808	STRN	striatin, calmodulin binding protein [Source:HGNC Symbol;Acc:11424]	-0.241843	6.0816	9.76816	0.0017756	0.0171591
ENSG00000134013	LOXL2	lysyl oxidase-like 2 [Source:HGNC Symbol;Acc:6666]	-0.516278	2.59732	9.76745	0.00177628	0.0171591
ENSG00000156374	PCGF6	polycomb group ring finger 6 [Source:HGNC Symbol;Acc:21156]	-0.301659	5.54803	9.76384	0.00177978	0.0171608
ENSG00000058668	ATP2B4	ATPase, Ca++ transporting, plasma membrane 4 [Source:HGNC Symbol;Acc:817]	-0.255131	5.7466	9.76382	0.0017798	0.0171608
ENSG00000165732	DDX21	DEAD (Asp-Glu-Ala-Asp) box helicase 21 [Source:HGNC Symbol;Acc:2744]	0.168499	9.30891	9.76368	0.00177993	0.0171608
ENSG00000154229	PRKCA	protein kinase C, alpha [Source:HGNC Symbol;Acc:9393]	-0.279842	5.42825	9.76013	0.00178337	0.0171828
ENSG00000157796	WDR19	WD repeat domain 19 [Source:HGNC Symbol;Acc:18340]	-0.242954	6.04518	9.7568	0.00178661	0.0171993
ENSG00000120800	UTP20	UTP20, small subunit (SSU) processome component, homolog (yeast) [Source:HGNC Symbol;Acc:17897]	0.185784	7.94874	9.75598	0.0017874	0.0171993
ENSG00000129691	ASH2L	ash2 (absent, small, or homeotic)-like (Drosophila) [Source:HGNC Symbol;Acc:744]	-0.246114	6.05478	9.75139	0.00179187	0.0172311
ENSG00000173208	ABCD2	ATP-binding cassette, sub-family D (ALD), member 2 [Source:HGNC Symbol;Acc:66]	-0.378124	4.24747	9.7439	0.00179919	0.0172896
ENSG00000130382	MLLT1	myeloid/lymphoid or mixed-lineage leukemia (trithorax homolog, Drosophila); translocated to, 1 [Source:HGNC Symbol;Acc:7134]	0.297369	6.01928	9.74277	0.0018003	0.0172896
ENSG00000141140	MYO19	myosin XIX [Source:HGNC Symbol;Acc:26234]	0.267141	5.95001	9.74027	0.00180274	0.0173019
ENSG00000240935	PLGLA	plasminogen-like A [Source:HGNC Symbol;Acc:9074]	-0.704606	1.67995	9.73341	0.00180949	0.0173554
ENSG00000213762	ZNF134	zinc finger protein 134 [Source:HGNC Symbol;Acc:12918]	-0.40172	4.09403	9.73044	0.00181241	0.017362
ENSG00000197457	STMN3	stathmin-like 3 [Source:HGNC Symbol;Acc:15926]	0.316376	6.01853	9.73032	0.00181253	0.017362
ENSG00000188846	RPL14	ribosomal protein L14 [Source:HGNC Symbol;Acc:10305]	0.173194	8.5789	9.72809	0.00181473	0.0173719
ENSG00000204054	RP11-492E3.1		-0.560196	2.24074	9.72384	0.00181893	0.0174008
ENSG00000162004	CCDC78	coiled-coil domain containing 78 [Source:HGNC Symbol;Acc:14153]	0.871249	1.59191	9.71348	0.00182922	0.017488
ENSG00000101199	ARFGAP1	ADP-ribosylation factor GTPase activating protein 1 [Source:HGNC Symbol;Acc:15852]	0.347357	5.54511	9.7042	0.00183848	0.0175651
ENSG00000163902	RPN1	ribophorin I [Source:HGNC Symbol;Acc:10381]	0.186558	7.83063	9.70241	0.00184027	0.0175697
ENSG00000184979	USP18	ubiquitin specific peptidase 18 [Source:HGNC Symbol;Acc:12616]	-0.522045	2.9822	9.70135	0.00184132	0.0175697
ENSG00000170779	CDCA4	cell division cycle associated 4 [Source:HGNC Symbol;Acc:14625]	0.318157	4.7454	9.68063	0.00186221	0.0177575
ENSG00000160691	SHC1	SHC (Src homology 2 domain containing) transforming protein 1 [Source:HGNC Symbol;Acc:10840]	-0.209798	8.00715	9.67505	0.00186787	0.0177924
ENSG00000188994	ZNF292	zinc finger protein 292 [Source:HGNC Symbol;Acc:18410]	-0.214264	7.35065	9.67466	0.00186827	0.0177924
ENSG00000171960	PPIH	peptidylprolyl isomerase H (cyclophilin H) [Source:HGNC Symbol;Acc:14651]	0.263851	5.50451	9.67172	0.00187126	0.0178094
ENSG00000189159	HN1	hematological and neurological expressed 1 [Source:HGNC Symbol;Acc:14569]	0.17466	8.42542	9.67005	0.00187296	0.0178141
ENSG00000140368	PSTPIP1	proline-serine-threonine phosphatase interacting protein 1 [Source:HGNC Symbol;Acc:9580]	-0.739203	1.27046	9.65737	0.00188593	0.0179167
ENSG00000099800	TIMM13	translocase of inner mitochondrial membrane 13 homolog (yeast) [Source:HGNC Symbol;Acc:11816]	0.327016	5.10237	9.65665	0.00188667	0.0179167
ENSG00000131584	ACAP3	ArfGAP with coiled-coil, ankyrin repeat and PH domains 3 [Source:HGNC Symbol;Acc:16754]	0.480772	4.37452	9.65597	0.00188737	0.0179167
ENSG00000138111	TMEM180	transmembrane protein 180 [Source:HGNC Symbol;Acc:26196]	0.615086	2.14642	9.64824	0.00189533	0.0179807
ENSG00000173221	GLRX	glutaredoxin (thioltransferase) [Source:HGNC Symbol;Acc:4330]	-0.424667	3.55017	9.64643	0.0018972	0.017987
ENSG00000259555	RP11-335K5.2		-0.728789	1.50578	9.64479	0.00189889	0.0179915
ENSG00000137478	FCHSD2	FCH and double SH3 domains 2 [Source:HGNC Symbol;Acc:29114]	-0.278687	5.20888	9.63578	0.00190823	0.0180684
ENSG00000140403	DNAJA4	DnaJ (Hsp40) homolog, subfamily A, member 4 [Source:HGNC Symbol;Acc:14885]	0.814177	1.13251	9.63364	0.00191045	0.0180779
ENSG00000187531	SIRT7	sirtuin 7 [Source:HGNC Symbol;Acc:14935]	0.456048	3.67538	9.62884	0.00191545	0.0181136
ENSG00000245910	SNHG6	small nucleolar RNA host gene 6 (non-protein coding) [Source:HGNC Symbol;Acc:32965]	0.241448	6.11667	9.61646	0.00192841	0.0181931
ENSG00000135722	FBXL8	F-box and leucine-rich repeat protein 8 [Source:HGNC Symbol;Acc:17875]	-1.05305	0.391364	9.6164	0.00192847	0.0181931
ENSG00000130810	PPAN	peter pan homolog (Drosophila) [Source:HGNC Symbol;Acc:9227]	0.602544	2.65447	9.61509	0.00192985	0.0181931
ENSG00000109066	TMEM104	transmembrane protein 104 [Source:HGNC Symbol;Acc:25984]	0.316422	5.32083	9.61379	0.00193122	0.0181931
ENSG00000081377	CDC14B	CDC14 cell division cycle 14 homolog B (S. cerevisiae) [Source:HGNC Symbol;Acc:1719]	-0.331585	4.76665	9.61368	0.00193133	0.0181931
ENSG00000196387	ZNF140	zinc finger protein 140 [Source:HGNC Symbol;Acc:12925]	-0.283874	5.50431	9.61204	0.00193306	0.0181931
ENSG00000105726	ATP13A1	ATPase type 13A1 [Source:HGNC Symbol;Acc:24215]	0.319902	5.74969	9.61193	0.00193317	0.0181931
ENSG00000174775	HRAS	v-Ha-ras Harvey rat sarcoma viral oncogene homolog [Source:HGNC Symbol;Acc:5173]	0.411647	4.32223	9.61144	0.00193369	0.0181931
ENSG00000175893	ZDHHC21	zinc finger, DHHC-type containing 21 [Source:HGNC Symbol;Acc:20750]	-0.325874	4.65946	9.60922	0.00193603	0.0182036
ENSG00000131378	RFTN1	raftlin, lipid raft linker 1 [Source:HGNC Symbol;Acc:30278]	-0.502955	2.99856	9.59977	0.00194602	0.0182859
ENSG00000120251	GRIA2	glutamate receptor, ionotropic, AMPA 2 [Source:HGNC Symbol;Acc:4572]	0.562805	2.93824	9.5985	0.00194737	0.018287
ENSG00000161036	LRWD1	leucine-rich repeats and WD repeat domain containing 1 [Source:HGNC Symbol;Acc:21769]	0.473308	3.9943	9.59395	0.00195219	0.0183206
ENSG00000003137	CYP26B1	cytochrome P450, family 26, subfamily B, polypeptide 1 [Source:HGNC Symbol;Acc:20581]	-0.964661	0.711486	9.59184	0.00195443	0.0183301
ENSG00000184779	RPS17	ribosomal protein S17 [Source:HGNC Symbol;Acc:10397]	0.967803	0.480297	9.59028	0.0019561	0.0183341
ENSG00000135622	SEMA4F	sema domain, immunoglobulin domain (Ig), transmembrane domain (TM) and short cytoplasmic domain, (semaphorin) 4F [Source:HGNC Symbol;Acc:10734]	-0.361516	4.5113	9.58879	0.00195769	0.0183374
ENSG00000135999	EPC2	enhancer of polycomb homolog 2 (Drosophila) [Source:HGNC Symbol;Acc:24543]	-0.226574	6.3457	9.58548	0.00196122	0.0183589
ENSG00000062485	CS	citrate synthase [Source:HGNC Symbol;Acc:2422]	0.176824	8.06901	9.57916	0.00196798	0.0184105
ENSG00000133138	TBC1D8B	TBC1 domain family, member 8B (with GRAM domain) [Source:HGNC Symbol;Acc:24715]	-0.314275	4.84876	9.57551	0.0019719	0.0184355
ENSG00000166887	VPS39	vacuolar protein sorting 39 homolog (S. cerevisiae) [Source:HGNC Symbol;Acc:20593]	-0.232725	6.2275	9.57095	0.0019768	0.0184697
ENSG00000155970	EFHA2	EF-hand domain family, member A2 [Source:HGNC Symbol;Acc:27820]	-0.443161	3.40055	9.56669	0.0019814	0.018501
ENSG00000129159	KCNC1	potassium voltage-gated channel, Shaw-related subfamily, member 1 [Source:HGNC Symbol;Acc:6233]	0.35569	4.83328	9.56057	0.00198801	0.018551
ENSG00000240038	AMY2B	amylase, alpha 2B (pancreatic) [Source:HGNC Symbol;Acc:478]	-0.877235	0.806612	9.55614	0.00199282	0.0185835
ENSG00000162065	TBC1D24	TBC1 domain family, member 24 [Source:HGNC Symbol;Acc:29203]	0.318188	5.01164	9.55505	0.001994	0.0185835
ENSG00000186834	HEXIM1	hexamethylene bis-acetamide inducible 1 [Source:HGNC Symbol;Acc:24953]	-0.232165	6.31753	9.54393	0.00200611	0.0186846
ENSG00000167807	FDX1L	ferredoxin 1-like [Source:HGNC Symbol;Acc:30546]	0.510099	3.14448	9.53663	0.00201411	0.0187473
ENSG00000180964	TCEAL8	transcription elongation factor A (SII)-like 8 [Source:HGNC Symbol;Acc:28683]	-0.249715	5.87897	9.53469	0.00201625	0.0187554
ENSG00000154997	SEPT14	septin 14 [Source:HGNC Symbol;Acc:33280]	-0.858067	0.8936	9.53135	0.00201991	0.0187777
ENSG00000152256	PDK1	pyruvate dehydrogenase kinase, isozyme 1 [Source:HGNC Symbol;Acc:8809]	-0.445212	4.02882	9.52929	0.00202219	0.018787
ENSG00000123552	USP45	ubiquitin specific peptidase 45 [Source:HGNC Symbol;Acc:20080]	-0.295148	5.50319	9.52586	0.00202596	0.0188104
ENSG00000122417	ODF2L	outer dense fiber of sperm tails 2-like [Source:HGNC Symbol;Acc:29225]	-0.226884	6.49291	9.51829	0.00203434	0.0188678
ENSG00000230392	RP5-1139I1.1		1.04482	0.466933	9.51768	0.00203502	0.0188678
ENSG00000188549	C15orf52	chromosome 15 open reading frame 52 [Source:HGNC Symbol;Acc:33488]	-0.572282	2.405	9.51682	0.00203598	0.0188678
ENSG00000204790	CBWD6	COBW domain containing 6 [Source:HGNC Symbol;Acc:31978]	0.563026	2.63637	9.51546	0.00203748	0.0188699
ENSG00000148291	SURF2	surfeit 2 [Source:HGNC Symbol;Acc:11475]	0.430588	3.82931	9.51284	0.00204039	0.0188767
ENSG00000170624	SGCD	sarcoglycan, delta (35kDa dystrophin-associated glycoprotein) [Source:HGNC Symbol;Acc:10807]	-0.266879	5.64275	9.51251	0.00204076	0.0188767
ENSG00000178904	DPY19L3	dpy-19-like 3 (C. elegans) [Source:HGNC Symbol;Acc:27120]	-0.209287	6.87963	9.5112	0.00204221	0.0188784
ENSG00000156515	HK1	hexokinase 1 [Source:HGNC Symbol;Acc:4922]	-0.23233	6.4815	9.50944	0.00204418	0.0188847
ENSG00000140406	MESDC1	mesoderm development candidate 1 [Source:HGNC Symbol;Acc:13519]	0.321151	5.32065	9.50234	0.0020521	0.0189461
ENSG00000145632	PLK2	polo-like kinase 2 [Source:HGNC Symbol;Acc:19699]	0.254278	6.31986	9.49824	0.00205669	0.0189766
ENSG00000260398	RP11-594N15.3		-0.701445	1.57542	9.49702	0.00205806	0.0189775
ENSG00000104983	CCDC61	coiled-coil domain containing 61 [Source:HGNC Symbol;Acc:33629]	0.668654	1.64931	9.4925	0.00206313	0.0190124
ENSG00000116922	C1orf109	chromosome 1 open reading frame 109 [Source:HGNC Symbol;Acc:26039]	0.256844	5.73704	9.48074	0.00207641	0.0191228
ENSG00000135763	URB2	URB2 ribosome biogenesis 2 homolog (S. cerevisiae) [Source:HGNC Symbol;Acc:28967]	0.197076	7.03269	9.47815	0.00207934	0.0191379
ENSG00000106803	SEC61B	Sec61 beta subunit [Source:HGNC Symbol;Acc:16993]	0.219209	6.33107	9.465	0.00209429	0.0192636
ENSG00000158669	AGPAT6	1-acylglycerol-3-phosphate O-acyltransferase 6 (lysophosphatidic acid acyltransferase, zeta) [Source:HGNC Symbol;Acc:20880]	0.205701	6.9329	9.46349	0.00209602	0.0192675
ENSG00000102038	SMARCA1	SWI/SNF related, matrix associated, actin dependent regulator of chromatin, subfamily a, member 1 [Source:HGNC Symbol;Acc:11097]	-0.206856	7.30546	9.46034	0.00209962	0.0192887
ENSG00000197323	TRIM33	tripartite motif containing 33 [Source:HGNC Symbol;Acc:16290]	-0.183675	7.89774	9.45442	0.00210641	0.019339
ENSG00000107537	PHYH	phytanoyl-CoA 2-hydroxylase [Source:HGNC Symbol;Acc:8940]	-0.390791	3.88371	9.4488	0.00211288	0.0193864
ENSG00000109756	RAPGEF2	Rap guanine nucleotide exchange factor (GEF) 2 [Source:HGNC Symbol;Acc:16854]	-0.2463	5.72647	9.44673	0.00211526	0.0193962
ENSG00000126561	STAT5A	signal transducer and activator of transcription 5A [Source:HGNC Symbol;Acc:11366]	0.353236	4.69533	9.43343	0.00213065	0.0195253
ENSG00000126457	PRMT1	protein arginine methyltransferase 1 [Source:HGNC Symbol;Acc:5187]	0.230265	7.372	9.43157	0.00213282	0.019533
ENSG00000125485	DDX31	DEAD (Asp-Glu-Ala-Asp) box polypeptide 31 [Source:HGNC Symbol;Acc:16715]	0.265373	5.50749	9.42661	0.00213859	0.0195738
ENSG00000171425	ZNF581	zinc finger protein 581 [Source:HGNC Symbol;Acc:25017]	0.435245	3.72883	9.4154	0.0021517	0.0196816
ENSG00000099341	PSMD8	proteasome (prosome, macropain) 26S subunit, non-ATPase, 8 [Source:HGNC Symbol;Acc:9566]	0.243465	6.6077	9.40211	0.00216736	0.0198126
ENSG00000088367	EPB41L1	erythrocyte membrane protein band 4.1-like 1 [Source:HGNC Symbol;Acc:3378]	-0.417804	3.91961	9.39418	0.00217675	0.0198862
ENSG00000197892	KIF13B	kinesin family member 13B [Source:HGNC Symbol;Acc:14405]	-0.466969	2.96248	9.37901	0.00219484	0.0200391
ENSG00000064309	CDON	Cdon homolog (mouse) [Source:HGNC Symbol;Acc:17104]	-0.20554	7.22295	9.36976	0.00220595	0.0201281
ENSG00000137486	ARRB1	arrestin, beta 1 [Source:HGNC Symbol;Acc:711]	-0.515017	2.74655	9.36335	0.00221367	0.0201862
ENSG00000137177	KIF13A	kinesin family member 13A [Source:HGNC Symbol;Acc:14566]	-0.225269	6.20592	9.3564	0.00222208	0.0202504
ENSG00000166938	DIS3L	DIS3 mitotic control homolog (S. cerevisiae)-like [Source:HGNC Symbol;Acc:28698]	-0.305007	5.02665	9.34845	0.00223174	0.0203138
ENSG00000105928	DFNA5	deafness, autosomal dominant 5 [Source:HGNC Symbol;Acc:2810]	-0.40176	3.54032	9.34734	0.0022331	0.0203138
ENSG00000063244	U2AF2	U2 small nuclear RNA auxiliary factor 2 [Source:HGNC Symbol;Acc:23156]	0.240182	7.5168	9.34661	0.00223398	0.0203138
ENSG00000156313	RPGR	retinitis pigmentosa GTPase regulator [Source:HGNC Symbol;Acc:10295]	-0.367481	4.11873	9.34616	0.00223453	0.0203138
ENSG00000260966	RP11-690D19.3		-0.591366	2.46117	9.34427	0.00223684	0.0203223
ENSG00000173452	TMEM196	transmembrane protein 196 [Source:HGNC Symbol;Acc:22431]	-1.32784	-0.263656	9.33882	0.0022435	0.0203632
ENSG00000197841	ZNF181	zinc finger protein 181 [Source:HGNC Symbol;Acc:12971]	-0.340678	4.5103	9.33834	0.00224409	0.0203632
ENSG00000116903	EXOC8	exocyst complex component 8 [Source:HGNC Symbol;Acc:24659]	0.24523	5.8343	9.33572	0.0022473	0.0203798
ENSG00000118600	TMEM5	transmembrane protein 5 [Source:HGNC Symbol;Acc:13530]	0.33984	4.4381	9.3336	0.00224989	0.0203909
ENSG00000105327	BBC3	BCL2 binding component 3 [Source:HGNC Symbol;Acc:17868]	-0.750762	1.88666	9.32513	0.00226032	0.0204728
ENSG00000104885	DOT1L	DOT1-like, histone H3 methyltransferase (S. cerevisiae) [Source:HGNC Symbol;Acc:24948]	0.334843	5.80895	9.3191	0.00226777	0.0205278
ENSG00000112715	VEGFA	vascular endothelial growth factor A [Source:HGNC Symbol;Acc:12680]	0.359479	5.15535	9.31103	0.00227778	0.0205952
ENSG00000105700	KXD1	KxDL motif containing 1 [Source:HGNC Symbol;Acc:28420]	0.305057	5.0972	9.3093	0.00227993	0.0205952
ENSG00000256895	AF127577.1		-0.57675	2.41332	9.30868	0.00228071	0.0205952
ENSG00000100167	SEPT3	septin 3 [Source:HGNC Symbol;Acc:10750]	0.191883	7.4595	9.30862	0.00228079	0.0205952
ENSG00000053372	MRTO4	mRNA turnover 4 homolog (S. cerevisiae) [Source:HGNC Symbol;Acc:18477]	0.280339	5.2032	9.30671	0.00228316	0.0206041
ENSG00000188266	AGPHD1	aminoglycoside phosphotransferase domain containing 1 [Source:HGNC Symbol;Acc:34403]	-0.914069	0.5259	9.29726	0.00229497	0.0206981
ENSG00000039560	RAI14	retinoic acid induced 14 [Source:HGNC Symbol;Acc:14873]	-0.170545	8.30634	9.29608	0.00229644	0.0206987
ENSG00000123200	ZC3H13	zinc finger CCCH-type containing 13 [Source:HGNC Symbol;Acc:20368]	-0.179444	7.74576	9.29487	0.00229796	0.0206998
ENSG00000261716	RP11-196G18.22		0.288831	5.89199	9.2922	0.00230131	0.0207141
ENSG00000205542	TMSB4X	thymosin beta 4, X-linked [Source:HGNC Symbol;Acc:11881]	-0.159122	8.94919	9.29138	0.00230235	0.0207141
ENSG00000198933	TBKBP1	TBK1 binding protein 1 [Source:HGNC Symbol;Acc:30140]	0.30177	6.25157	9.28495	0.00231044	0.0207743
ENSG00000100029	PES1	pescadillo ribosomal biogenesis factor 1 [Source:HGNC Symbol;Acc:8848]	0.242426	6.59252	9.28022	0.00231641	0.0208154
ENSG00000189184	PCDH18	protocadherin 18 [Source:HGNC Symbol;Acc:14268]	0.329129	4.89867	9.2746	0.00232353	0.0208667
ENSG00000100316	RPL3	ribosomal protein L3 [Source:HGNC Symbol;Acc:10332]	0.173519	10.3907	9.2695	0.00233002	0.0209123
ENSG00000164398	ACSL6	acyl-CoA synthetase long-chain family member 6 [Source:HGNC Symbol;Acc:16496]	-0.958131	1.02743	9.26583	0.00233469	0.0209415
ENSG00000120549	KIAA1217	KIAA1217 [Source:HGNC Symbol;Acc:25428]	-0.33392	4.53177	9.26388	0.00233717	0.0209511
ENSG00000171314	PGAM1	phosphoglycerate mutase 1 (brain) [Source:HGNC Symbol;Acc:8888]	0.172594	8.1049	9.2596	0.00234264	0.0209874
ENSG00000143028	SYPL2	synaptophysin-like 2 [Source:HGNC Symbol;Acc:27638]	1.15551	0.441594	9.25761	0.00234519	0.0209975
ENSG00000180448	HMHA1	histocompatibility (minor) HA-1 [Source:HGNC Symbol;Acc:17102]	0.607818	2.55794	9.25109	0.00235355	0.0210597
ENSG00000231242	RP11-87H9.3		-1.05168	0.294186	9.24591	0.00236021	0.0211065
ENSG00000101126	ADNP	activity-dependent neuroprotector homeobox [Source:HGNC Symbol;Acc:15766]	-0.17495	8.33822	9.24155	0.00236585	0.0211351
ENSG00000066279	ASPM	asp (abnormal spindle) homolog, microcephaly associated (Drosophila) [Source:HGNC Symbol;Acc:19048]	-0.176562	8.28352	9.24123	0.00236626	0.0211351
ENSG00000101752	MIB1	mindbomb E3 ubiquitin protein ligase 1 [Source:HGNC Symbol;Acc:21086]	-0.192689	7.65113	9.2393	0.00236875	0.0211445
ENSG00000179454	KLHL28	kelch-like 28 (Drosophila) [Source:HGNC Symbol;Acc:19741]	-0.421464	3.57106	9.23761	0.00237094	0.0211447
ENSG00000160949	TONSL	tonsoku-like, DNA repair protein [Source:HGNC Symbol;Acc:7801]	0.3564	5.12722	9.23675	0.00237206	0.0211447
ENSG00000175115	PACS1	phosphofurin acidic cluster sorting protein 1 [Source:HGNC Symbol;Acc:30032]	-0.475162	3.04709	9.23516	0.00237411	0.0211447
ENSG00000179361	ARID3B	AT rich interactive domain 3B (BRIGHT-like) [Source:HGNC Symbol;Acc:14350]	0.316823	5.13737	9.23488	0.00237447	0.0211447
ENSG00000105447	GRWD1	glutamate-rich WD repeat containing 1 [Source:HGNC Symbol;Acc:21270]	0.305109	5.52981	9.23248	0.00237759	0.0211597
ENSG00000189306	RRP7A	ribosomal RNA processing 7 homolog A (S. cerevisiae) [Source:HGNC Symbol;Acc:24286]	0.270645	5.60099	9.22495	0.00238739	0.0212342
ENSG00000153993	SEMA3D	sema domain, immunoglobulin domain (Ig), short basic domain, secreted, (semaphorin) 3D [Source:HGNC Symbol;Acc:10726]	0.886223	2.19068	9.2227	0.00239033	0.0212475
ENSG00000187391	MAGI2	membrane associated guanylate kinase, WW and PDZ domain containing 2 [Source:HGNC Symbol;Acc:18957]	-0.446645	3.18598	9.21421	0.00240144	0.0213335
ENSG00000143545	RAB13	RAB13, member RAS oncogene family [Source:HGNC Symbol;Acc:9762]	-0.320652	4.4009	9.21073	0.002406	0.0213612
ENSG00000260248	RP11-143K11.1		0.220599	6.72711	9.19874	0.00242181	0.0214887
ENSG00000161999	JMJD8	jumonji domain containing 8 [Source:HGNC Symbol;Acc:14148]	0.44898	3.41088	9.19528	0.0024264	0.0215165
ENSG00000160285	LSS	lanosterol synthase (2,3-oxidosqualene-lanosterol cyclase) [Source:HGNC Symbol;Acc:6708]	0.264411	6.76774	9.18245	0.00244347	0.0216473
ENSG00000157657	ZNF618	zinc finger protein 618 [Source:HGNC Symbol;Acc:29416]	-0.208629	6.8852	9.18133	0.00244496	0.0216473
ENSG00000198315	ZNF192	zinc finger protein 192 [Source:HGNC Symbol;Acc:12983]	-0.213074	6.60637	9.18059	0.00244595	0.0216473
ENSG00000183837	PNMA3	paraneoplastic Ma antigen 3 [Source:HGNC Symbol;Acc:18742]	-0.825806	0.884937	9.17981	0.002447	0.0216473
ENSG00000130475	FCHO1	FCH domain only 1 [Source:HGNC Symbol;Acc:29002]	-1.23975	-0.420351	9.17765	0.00244988	0.0216599
ENSG00000140545	MFGE8	milk fat globule-EGF factor 8 protein [Source:HGNC Symbol;Acc:7036]	-0.321532	5.10813	9.17628	0.00245171	0.0216631
ENSG00000111348	ARHGDIB	Rho GDP dissociation inhibitor (GDI) beta [Source:HGNC Symbol;Acc:679]	0.604076	2.37256	9.17509	0.00245331	0.0216643
ENSG00000260260	RP11-304L19.5		0.505362	3.03942	9.16849	0.00246217	0.0217296
ENSG00000115902	SLC1A4	solute carrier family 1 (glutamate/neutral amino acid transporter), member 4 [Source:HGNC Symbol;Acc:10942]	0.348554	4.56403	9.16419	0.00246796	0.0217678
ENSG00000149311	ATM	ataxia telangiectasia mutated [Source:HGNC Symbol;Acc:795]	-0.212306	6.69205	9.14956	0.00248778	0.0219295
ENSG00000126461	SCAF1	SR-related CTD-associated factor 1 [Source:HGNC Symbol;Acc:30403]	0.386337	5.11772	9.14422	0.00249506	0.0219697
ENSG00000185920	PTCH1	patched 1 [Source:HGNC Symbol;Acc:9585]	-0.223629	6.2197	9.14403	0.00249531	0.0219697
ENSG00000031698	SARS	seryl-tRNA synthetase [Source:HGNC Symbol;Acc:10537]	0.180093	8.1255	9.13824	0.00250322	0.0220263
ENSG00000131480	AOC2	amine oxidase, copper containing 2 (retina-specific) [Source:HGNC Symbol;Acc:549]	0.678216	3.15571	9.12583	0.00252026	0.0221512
ENSG00000182389	CACNB4	calcium channel, voltage-dependent, beta 4 subunit [Source:HGNC Symbol;Acc:1404]	-0.602055	2.3258	9.12572	0.00252041	0.0221512
ENSG00000176834	VSIG10	V-set and immunoglobulin domain containing 10 [Source:HGNC Symbol;Acc:26078]	-0.398622	3.57851	9.12266	0.00252462	0.022175
ENSG00000143376	SNX27	sorting nexin family member 27 [Source:HGNC Symbol;Acc:20073]	0.188566	7.8591	9.11987	0.00252848	0.0221958
ENSG00000185721	DRG1	developmentally regulated GTP binding protein 1 [Source:HGNC Symbol;Acc:3029]	0.206964	6.54999	9.1082	0.00254467	0.0223246
ENSG00000103266	STUB1	STIP1 homology and U-box containing protein 1, E3 ubiquitin protein ligase [Source:HGNC Symbol;Acc:11427]	0.520547	2.9772	9.10272	0.00255229	0.0223783
ENSG00000077380	DYNC1I2	dynein, cytoplasmic 1, intermediate chain 2 [Source:HGNC Symbol;Acc:2964]	-0.189756	7.33813	9.09065	0.0025692	0.0224884
ENSG00000140941	MAP1LC3B	microtubule-associated protein 1 light chain 3 beta [Source:HGNC Symbol;Acc:13352]	-0.288452	5.37389	9.08945	0.00257088	0.0224884
ENSG00000242474	AC093627.9		-0.719285	1.35182	9.08874	0.00257189	0.0224884
ENSG00000204348	DOM3Z	dom-3 homolog Z (C. elegans) [Source:HGNC Symbol;Acc:2992]	0.43862	3.88688	9.08851	0.00257221	0.0224884
ENSG00000181163	NPM1	nucleophosmin (nucleolar phosphoprotein B23, numatrin) [Source:HGNC Symbol;Acc:7910]	0.14883	11.0659	9.08747	0.00257367	0.0224884
ENSG00000170412	GPRC5C	G protein-coupled receptor, family C, group 5, member C [Source:HGNC Symbol;Acc:13309]	-0.568763	2.79128	9.08726	0.00257396	0.0224884
ENSG00000135297	MTO1	mitochondrial translation optimization 1 homolog (S. cerevisiae) [Source:HGNC Symbol;Acc:19261]	0.275255	5.29645	9.08473	0.00257753	0.0225063
ENSG00000124209	RAB22A	RAB22A, member RAS oncogene family [Source:HGNC Symbol;Acc:9764]	-0.261427	5.78894	9.08361	0.00257911	0.0225068
ENSG00000048828	FAM120A	family with sequence similarity 120A [Source:HGNC Symbol;Acc:13247]	0.206808	6.78058	9.08135	0.00258229	0.0225213
ENSG00000131653	TRAF7	TNF receptor-associated factor 7, E3 ubiquitin protein ligase [Source:HGNC Symbol;Acc:20456]	0.291156	5.93181	9.07794	0.00258711	0.02255
ENSG00000181873	IBA57	IBA57, iron-sulfur cluster assembly homolog (S. cerevisiae) [Source:HGNC Symbol;Acc:27302]	-0.322041	4.74808	9.07391	0.00259282	0.0225865
ENSG00000130584	ZBTB46	zinc finger and BTB domain containing 46 [Source:HGNC Symbol;Acc:16094]	-0.44217	2.96199	9.07119	0.00259668	0.0226068
ENSG00000174013	FBXO45	F-box protein 45 [Source:HGNC Symbol;Acc:29148]	0.206367	6.76165	9.06747	0.00260196	0.0226395
ENSG00000130881	LRP3	low density lipoprotein receptor-related protein 3 [Source:HGNC Symbol;Acc:6695]	0.420771	4.76653	9.06199	0.00260977	0.0226942
ENSG00000169439	SDC2	syndecan 2 [Source:HGNC Symbol;Acc:10659]	-0.218579	6.39921	9.05766	0.00261597	0.0227192
ENSG00000259172	RP11-299G20.2		-0.589379	1.89513	9.05642	0.00261773	0.0227192
ENSG00000164663	USP49	ubiquitin specific peptidase 49 [Source:HGNC Symbol;Acc:20078]	-0.28393	5.02697	9.05595	0.00261841	0.0227192
ENSG00000131771	PPP1R1B	protein phosphatase 1, regulatory (inhibitor) subunit 1B [Source:HGNC Symbol;Acc:9287]	-0.909158	0.582668	9.05467	0.00262025	0.0227192
ENSG00000018510	AGPS	alkylglycerone phosphate synthase [Source:HGNC Symbol;Acc:327]	-0.191418	7.22768	9.05462	0.00262032	0.0227192
ENSG00000111962	UST	uronyl-2-sulfotransferase [Source:HGNC Symbol;Acc:17223]	-0.600764	1.86275	9.05106	0.00262543	0.0227501
ENSG00000162769	FLVCR1	feline leukemia virus subgroup C cellular receptor 1 [Source:HGNC Symbol;Acc:24682]	0.196766	7.07283	9.0473	0.00263083	0.0227779
ENSG00000173991	TCAP	titin-cap (telethonin) [Source:HGNC Symbol;Acc:11610]	1.42415	-0.0963509	9.04565	0.00263321	0.0227779
ENSG00000135446	CDK4	cyclin-dependent kinase 4 [Source:HGNC Symbol;Acc:1773]	0.192576	7.24702	9.04562	0.00263325	0.0227779
ENSG00000143924	EML4	echinoderm microtubule associated protein like 4 [Source:HGNC Symbol;Acc:1316]	-0.186888	7.67768	9.03897	0.00264284	0.0228476
ENSG00000213585	VDAC1	voltage-dependent anion channel 1 [Source:HGNC Symbol;Acc:12669]	0.171021	8.16371	9.03071	0.00265481	0.0229376
ENSG00000160679	CHTOP	chromatin target of PRMT1 [Source:HGNC Symbol;Acc:24511]	-0.173012	8.63807	9.02308	0.00266591	0.0230201
ENSG00000166987	MBD6	methyl-CpG binding domain protein 6 [Source:HGNC Symbol;Acc:20445]	0.344284	4.91252	9.01924	0.00267153	0.0230552
ENSG00000188501	LCTL	lactase-like [Source:HGNC Symbol;Acc:15583]	0.987019	0.521766	9.0164	0.00267568	0.0230749
ENSG00000135457	TFCP2	transcription factor CP2 [Source:HGNC Symbol;Acc:11748]	-0.1981	6.75137	9.01502	0.0026777	0.0230749
ENSG00000075624	ACTB	actin, beta [Source:HGNC Symbol;Acc:132]	0.168018	10.666	9.01349	0.00267995	0.0230749
ENSG00000185800	DMWD	dystrophia myotonica, WD repeat containing [Source:HGNC Symbol;Acc:2936]	0.416261	4.35583	9.01342	0.00268005	0.0230749
ENSG00000114850	SSR3	signal sequence receptor, gamma (translocon-associated protein gamma) [Source:HGNC Symbol;Acc:11325]	0.181702	8.14992	9.01118	0.00268333	0.0230898
ENSG00000178999	AURKB	aurora kinase B [Source:HGNC Symbol;Acc:11390]	0.26106	5.67157	9.00456	0.00269307	0.0231601
ENSG00000188486	H2AFX	H2A histone family, member X [Source:HGNC Symbol;Acc:4739]	0.382604	4.178	8.99331	0.0027097	0.0232741
ENSG00000160714	UBE2Q1	ubiquitin-conjugating enzyme E2Q family member 1 [Source:HGNC Symbol;Acc:15698]	0.163255	8.61605	8.99192	0.00271176	0.0232741
ENSG00000154263	ABCA10	ATP-binding cassette, sub-family A (ABC1), member 10 [Source:HGNC Symbol;Acc:30]	-0.423899	3.21828	8.99115	0.0027129	0.0232741
ENSG00000234741	GAS5	growth arrest-specific 5 (non-protein coding) [Source:HGNC Symbol;Acc:16355]	0.162528	8.95966	8.99072	0.00271354	0.0232741
ENSG00000117614	SYF2	SYF2 homolog, RNA splicing factor (S. cerevisiae) [Source:HGNC Symbol;Acc:19824]	-0.253432	5.88993	8.98865	0.00271662	0.0232741
ENSG00000052850	ALX4	ALX homeobox 4 [Source:HGNC Symbol;Acc:450]	-0.412891	3.50159	8.98748	0.00271836	0.0232741
ENSG00000215039	CD27-AS1	CD27 antisense RNA 1 [Source:HGNC Symbol;Acc:43896]	-0.379183	3.85956	8.98726	0.00271869	0.0232741
ENSG00000259050	CHORDC2P	cysteine and histidine-rich domain (CHORD) containing 2 pseudogene [Source:HGNC Symbol;Acc:20050]	1.29706	-0.266213	8.98711	0.0027189	0.0232741
ENSG00000241956	CTC-340A15.2		-0.522893	2.67799	8.98166	0.00272702	0.0233302
ENSG00000141380	SS18	synovial sarcoma translocation, chromosome 18 [Source:HGNC Symbol;Acc:11340]	-0.187686	7.23076	8.97522	0.00273666	0.023399
ENSG00000096872	IFT74	intraflagellar transport 74 homolog (Chlamydomonas) [Source:HGNC Symbol;Acc:21424]	-0.318461	4.61331	8.95912	0.00276088	0.0235925
ENSG00000225539	AC018799.1		-0.450532	3.25344	8.95683	0.00276434	0.0235981
ENSG00000142751	GPN2	GPN-loop GTPase 2 [Source:HGNC Symbol;Acc:25513]	0.427578	3.72609	8.9565	0.00276484	0.0235981
ENSG00000115216	NRBP1	nuclear receptor binding protein 1 [Source:HGNC Symbol;Acc:7993]	0.232375	6.21625	8.95553	0.00276632	0.0235981
ENSG00000160957	RECQL4	RecQ protein-like 4 [Source:HGNC Symbol;Acc:9949]	0.405664	5.24848	8.95292	0.00277027	0.0236183
ENSG00000197256	KANK2	KN motif and ankyrin repeat domains 2 [Source:HGNC Symbol;Acc:29300]	-0.338932	4.22902	8.94922	0.00277588	0.0236524
ENSG00000218422	AC016773.1		0.924914	0.63646	8.94786	0.00277794	0.0236564
ENSG00000143793	C1orf35	chromosome 1 open reading frame 35 [Source:HGNC Symbol;Acc:19032]	0.41625	4.14866	8.94351	0.00278456	0.0236992
ENSG00000165626	BEND7	BEN domain containing 7 [Source:HGNC Symbol;Acc:23514]	-0.308635	4.85938	8.92906	0.00280668	0.0238652
ENSG00000107554	DNMBP	dynamin binding protein [Source:HGNC Symbol;Acc:30373]	-0.363947	3.83901	8.92801	0.0028083	0.0238652
ENSG00000148516	ZEB1	zinc finger E-box binding homeobox 1 [Source:HGNC Symbol;Acc:11642]	-0.174918	7.65866	8.92658	0.0028105	0.0238652
ENSG00000162244	RPL29	ribosomal protein L29 [Source:HGNC Symbol;Acc:10331]	0.190892	8.66862	8.92657	0.00281051	0.0238652
ENSG00000136153	LMO7	LIM domain 7 [Source:HGNC Symbol;Acc:6646]	-0.336072	4.37991	8.91591	0.00282697	0.0239653
ENSG00000139329	LUM	lumican [Source:HGNC Symbol;Acc:6724]	1.51815	0.628479	8.91587	0.00282703	0.0239653
ENSG00000165533	TTC8	tetratricopeptide repeat domain 8 [Source:HGNC Symbol;Acc:20087]	-0.266397	5.76289	8.91579	0.00282716	0.0239653
ENSG00000130023	C6orf70	chromosome 6 open reading frame 70 [Source:HGNC Symbol;Acc:21056]	-0.355239	4.09536	8.91296	0.00283154	0.0239887
ENSG00000163479	SSR2	signal sequence receptor, beta (translocon-associated protein beta) [Source:HGNC Symbol;Acc:11324]	0.169643	8.82567	8.90837	0.00283866	0.0240353
ENSG00000123144	C19orf43	chromosome 19 open reading frame 43 [Source:HGNC Symbol;Acc:28424]	0.251442	6.29789	8.90486	0.00284412	0.0240678
ENSG00000070047	PHRF1	PHD and ring finger domains 1 [Source:HGNC Symbol;Acc:24351]	0.338237	5.53784	8.90212	0.00284839	0.0240902
ENSG00000064545	TMEM161A	transmembrane protein 161A [Source:HGNC Symbol;Acc:26020]	0.466703	3.51793	8.89939	0.00285266	0.0241125
ENSG00000197044	ZNF441	zinc finger protein 441 [Source:HGNC Symbol;Acc:20875]	-0.389627	3.93043	8.8907	0.00286627	0.0242136
ENSG00000176428	VPS37D	vacuolar protein sorting 37 homolog D (S. cerevisiae) [Source:HGNC Symbol;Acc:18287]	-0.910899	0.932194	8.88449	0.00287603	0.0242823
ENSG00000143942	CHAC2	ChaC, cation transport regulator homolog 2 (E. coli) [Source:HGNC Symbol;Acc:32363]	0.406075	3.81504	8.88169	0.00288045	0.0243057
ENSG00000130540	SULT4A1	sulfotransferase family 4A, member 1 [Source:HGNC Symbol;Acc:14903]	-0.37217	4.11433	8.87949	0.00288392	0.0243212
ENSG00000085872	CHERP	calcium homeostasis endoplasmic reticulum protein [Source:HGNC Symbol;Acc:16930]	0.261904	5.94527	8.876	0.00288944	0.0243538
ENSG00000113716	HMGXB3	HMG box domain containing 3 [Source:HGNC Symbol;Acc:28982]	0.245011	6.30038	8.87054	0.0028981	0.0244129
ENSG00000169188	APEX2	APEX nuclease (apurinic/apyrimidinic endonuclease) 2 [Source:HGNC Symbol;Acc:17889]	0.334456	4.70411	8.86904	0.00290048	0.0244191
ENSG00000125848	FLRT3	fibronectin leucine rich transmembrane protein 3 [Source:HGNC Symbol;Acc:3762]	-0.212438	6.35533	8.86177	0.00291205	0.0245026
ENSG00000188517	COL25A1	collagen, type XXV, alpha 1 [Source:HGNC Symbol;Acc:18603]	-0.432853	3.41336	8.86035	0.00291431	0.0245077
ENSG00000186907	RTN4RL2	reticulon 4 receptor-like 2 [Source:HGNC Symbol;Acc:23053]	0.778138	1.32366	8.85754	0.00291881	0.0245316
ENSG00000110427	KIAA1549L	KIAA1549-like [Source:HGNC Symbol;Acc:24836]	-0.245998	5.86547	8.8546	0.00292351	0.0245571
ENSG00000204116	CHIC1	cysteine-rich hydrophobic domain 1 [Source:HGNC Symbol;Acc:1934]	0.469057	3.18155	8.85034	0.00293035	0.0245794
ENSG00000148339	SLC25A25	solute carrier family 25 (mitochondrial carrier; phosphate carrier), member 25 [Source:HGNC Symbol;Acc:20663]	0.365859	4.89104	8.85026	0.00293047	0.0245794
ENSG00000074842	C19orf10	chromosome 19 open reading frame 10 [Source:HGNC Symbol;Acc:16948]	0.353017	5.03598	8.84984	0.00293114	0.0245794
ENSG00000161970	RPL26	ribosomal protein L26 [Source:HGNC Symbol;Acc:10327]	0.153643	9.68512	8.84596	0.00293738	0.0246178
ENSG00000141452	C18orf8	chromosome 18 open reading frame 8 [Source:HGNC Symbol;Acc:24326]	0.309	4.87788	8.83863	0.0029492	0.0247029
ENSG00000168438	CDC40	cell division cycle 40 homolog (S. cerevisiae) [Source:HGNC Symbol;Acc:17350]	-0.217685	6.29491	8.83419	0.00295639	0.0247491
ENSG00000171813	PWWP2B	PWWP domain containing 2B [Source:HGNC Symbol;Acc:25150]	0.530806	3.5189	8.83045	0.00296246	0.0247859
ENSG00000070413	DGCR2	DiGeorge syndrome critical region gene 2 [Source:HGNC Symbol;Acc:2845]	0.279631	5.67088	8.82802	0.00296641	0.0248049
ENSG00000204387	C6orf48	chromosome 6 open reading frame 48 [Source:HGNC Symbol;Acc:19078]	0.239288	5.9332	8.82172	0.00297667	0.0248601
ENSG00000115464	USP34	ubiquitin specific peptidase 34 [Source:HGNC Symbol;Acc:20066]	-0.169103	8.27423	8.8216	0.00297685	0.0248601
ENSG00000114698	PLSCR4	phospholipid scramblase 4 [Source:HGNC Symbol;Acc:16497]	-0.588224	1.64108	8.82087	0.00297804	0.0248601
ENSG00000084628	NKAIN1	Na+/K+ transporting ATPase interacting 1 [Source:HGNC Symbol;Acc:25743]	0.233357	6.0911	8.81842	0.00298204	0.0248795
ENSG00000162836	ACP6	acid phosphatase 6, lysophosphatidic [Source:HGNC Symbol;Acc:29609]	-0.36773	3.86716	8.81682	0.00298466	0.0248811
ENSG00000145293	ENOPH1	enolase-phosphatase 1 [Source:HGNC Symbol;Acc:24599]	0.216861	6.5732	8.81625	0.0029856	0.0248811
ENSG00000213619	NDUFS3	NADH dehydrogenase (ubiquinone) Fe-S protein 3, 30kDa (NADH-coenzyme Q reductase) [Source:HGNC Symbol;Acc:7710]	0.20826	6.53769	8.81337	0.00299032	0.0249064
ENSG00000184381	PLA2G6	phospholipase A2, group VI (cytosolic, calcium-independent) [Source:HGNC Symbol;Acc:9039]	-0.626347	1.92418	8.80619	0.0030021	0.0249905
ENSG00000109065	NAT9	N-acetyltransferase 9 (GCN5-related, putative) [Source:HGNC Symbol;Acc:23133]	0.309541	5.25499	8.80055	0.0030114	0.0250538
ENSG00000196338	NLGN3	neuroligin 3 [Source:HGNC Symbol;Acc:14289]	-0.896119	1.08997	8.79314	0.00302365	0.0251416
ENSG00000090674	MCOLN1	mucolipin 1 [Source:HGNC Symbol;Acc:13356]	0.37842	4.12908	8.78945	0.00302977	0.0251784
ENSG00000204178	TMEM57	transmembrane protein 57 [Source:HGNC Symbol;Acc:25572]	-0.258282	5.72615	8.77206	0.0030588	0.0254053
ENSG00000143549	TPM3	tropomyosin 3 [Source:HGNC Symbol;Acc:12012]	0.148849	9.70717	8.76482	0.00307097	0.0254921
ENSG00000164603	C7orf60	chromosome 7 open reading frame 60 [Source:HGNC Symbol;Acc:26475]	-0.28813	5.21828	8.76129	0.00307691	0.0255271
ENSG00000166426	CRABP1	cellular retinoic acid binding protein 1 [Source:HGNC Symbol;Acc:2338]	-0.664739	1.58457	8.76002	0.00307905	0.0255306
ENSG00000111860	CEP85L	centrosomal protein 85kDa-like [Source:HGNC Symbol;Acc:21638]	0.268072	5.6684	8.75866	0.00308136	0.0255355
ENSG00000168488	ATXN2L	ataxin 2-like [Source:HGNC Symbol;Acc:31326]	0.260133	7.1776	8.75752	0.00308328	0.0255371
ENSG00000177868	CCDC23	coiled-coil domain containing 23 [Source:HGNC Symbol;Acc:29204]	-0.400544	3.61222	8.75151	0.00309345	0.025607
ENSG00000148158	SNX30	sorting nexin family member 30 [Source:HGNC Symbol;Acc:23685]	-0.221911	6.23346	8.74877	0.0030981	0.0256312
ENSG00000170581	STAT2	signal transducer and activator of transcription 2, 113kDa [Source:HGNC Symbol;Acc:11363]	-0.299906	5.05314	8.74569	0.00310334	0.0256602
ENSG00000168090	COPS6	COP9 constitutive photomorphogenic homolog subunit 6 (Arabidopsis) [Source:HGNC Symbol;Acc:21749]	0.202781	6.53447	8.74291	0.00310808	0.025685
ENSG00000100726	TELO2	TEL2, telomere maintenance 2, homolog (S. cerevisiae) [Source:HGNC Symbol;Acc:29099]	0.407107	4.5034	8.74082	0.00311164	0.0257001
ENSG00000204839	C8orf73	chromosome 8 open reading frame 73 [Source:HGNC Symbol;Acc:27814]	0.985992	1.00053	8.73772	0.00311694	0.0257295
ENSG00000144674	GOLGA4	golgin A4 [Source:HGNC Symbol;Acc:4427]	0.205481	7.52036	8.73476	0.003122	0.025757
ENSG00000100479	POLE2	polymerase (DNA directed), epsilon 2, accessory subunit [Source:HGNC Symbol;Acc:9178]	-0.324449	4.76018	8.73153	0.00312754	0.0257883
ENSG00000136940	PDCL	phosducin-like [Source:HGNC Symbol;Acc:8770]	-0.249994	5.72444	8.73026	0.00312971	0.0257918
ENSG00000260597	AC012531.25		-0.797289	1.1969	8.71655	0.00315334	0.0259721
ENSG00000155849	ELMO1	engulfment and cell motility 1 [Source:HGNC Symbol;Acc:16286]	-0.745875	1.26351	8.7118	0.00316157	0.0260136
ENSG00000117859	OSBPL9	oxysterol binding protein-like 9 [Source:HGNC Symbol;Acc:16386]	-0.181168	7.92158	8.71162	0.00316189	0.0260136
ENSG00000100401	RANGAP1	Ran GTPase activating protein 1 [Source:HGNC Symbol;Acc:9854]	0.291488	6.43805	8.71015	0.00316443	0.0260136
ENSG00000160767	FAM189B	family with sequence similarity 189, member B [Source:HGNC Symbol;Acc:1233]	0.245944	6.9709	8.70959	0.00316541	0.0260136
ENSG00000158050	DUSP2	dual specificity phosphatase 2 [Source:HGNC Symbol;Acc:3068]	-1.20545	-0.301396	8.7063	0.00317113	0.0260364
ENSG00000147439	BIN3	bridging integrator 3 [Source:HGNC Symbol;Acc:1054]	0.438611	3.41533	8.70597	0.0031717	0.0260364
ENSG00000244754	N4BP2L2	NEDD4 binding protein 2-like 2 [Source:HGNC Symbol;Acc:26916]	-0.198077	6.98883	8.69498	0.00319088	0.0261793
ENSG00000001084	GCLC	glutamate-cysteine ligase, catalytic subunit [Source:HGNC Symbol;Acc:4311]	-0.211714	6.29275	8.68413	0.00320993	0.0263211
ENSG00000069667	RORA	RAR-related orphan receptor A [Source:HGNC Symbol;Acc:10258]	-0.582545	2.15192	8.68111	0.00321526	0.0263502
ENSG00000197063	MAFG	v-maf musculoaponeurotic fibrosarcoma oncogene homolog G (avian) [Source:HGNC Symbol;Acc:6781]	0.223849	6.51409	8.67929	0.00321847	0.0263619
ENSG00000010810	FYN	FYN oncogene related to SRC, FGR, YES [Source:HGNC Symbol;Acc:4037]	-0.207087	6.52702	8.67785	0.003221	0.0263681
ENSG00000058262	SEC61A1	Sec61 alpha 1 subunit (S. cerevisiae) [Source:HGNC Symbol;Acc:18276]	0.184701	8.18936	8.67577	0.00322469	0.0263834
ENSG00000142784	WDTC1	WD and tetratricopeptide repeats 1 [Source:HGNC Symbol;Acc:29175]	-0.351571	4.34078	8.67478	0.00322644	0.0263834
ENSG00000166275	C10orf32	chromosome 10 open reading frame 32 [Source:HGNC Symbol;Acc:23516]	-0.308962	4.8221	8.67245	0.00323056	0.0264025
ENSG00000164037	SLC9B1	solute carrier family 9, subfamily B (NHA1, cation proton antiporter 1), member 1 [Source:HGNC Symbol;Acc:24244]	1.116	-0.14851	8.66382	0.00324591	0.0265133
ENSG00000169231	THBS3	thrombospondin 3 [Source:HGNC Symbol;Acc:11787]	-0.288048	5.23421	8.66141	0.0032502	0.02653
ENSG00000196365	LONP1	lon peptidase 1, mitochondrial [Source:HGNC Symbol;Acc:9479]	0.292958	6.41346	8.66066	0.00325153	0.02653
ENSG00000171681	ATF7IP	activating transcription factor 7 interacting protein [Source:HGNC Symbol;Acc:20092]	-0.200554	6.74529	8.65598	0.00325991	0.0265837
ENSG00000196924	FLNA	filamin A, alpha [Source:HGNC Symbol;Acc:3754]	0.286083	9.1896	8.65293	0.00326537	0.0266135
ENSG00000214026	MRPL23	mitochondrial ribosomal protein L23 [Source:HGNC Symbol;Acc:10322]	0.353213	4.62493	8.65096	0.00326889	0.0266276
ENSG00000198040	ZNF84	zinc finger protein 84 [Source:HGNC Symbol;Acc:13159]	-0.18429	7.53998	8.64809	0.00327405	0.026655
ENSG00000249709	ZNF564	zinc finger protein 564 [Source:HGNC Symbol;Acc:31106]	-0.4191	3.32511	8.64371	0.00328192	0.0267044
ENSG00000197479	PCDHB11	protocadherin beta 11 [Source:HGNC Symbol;Acc:8682]	-0.454904	3.38149	8.6419	0.00328519	0.0267163
ENSG00000177575	CD163	CD163 molecule [Source:HGNC Symbol;Acc:1631]	-0.7807	0.93021	8.64022	0.00328822	0.0267263
ENSG00000145779	TNFAIP8	tumor necrosis factor, alpha-induced protein 8 [Source:HGNC Symbol;Acc:17260]	-0.322143	4.53848	8.63528	0.00329715	0.0267842
ENSG00000168994	PXDC1	PX domain containing 1 [Source:HGNC Symbol;Acc:21361]	-0.701082	1.49251	8.62827	0.00330986	0.0268727
ENSG00000168993	CPLX1	complexin 1 [Source:HGNC Symbol;Acc:2309]	0.627019	2.63364	8.62624	0.00331355	0.0268879
ENSG00000186470	BTN3A2	butyrophilin, subfamily 3, member A2 [Source:HGNC Symbol;Acc:1139]	-0.72444	1.63828	8.61984	0.00332521	0.0269677
ENSG00000188895	MSL1	male-specific lethal 1 homolog (Drosophila) [Source:HGNC Symbol;Acc:27905]	0.189443	7.39938	8.61689	0.0033306	0.0269966
ENSG00000165527	ARF6	ADP-ribosylation factor 6 [Source:HGNC Symbol;Acc:659]	0.288302	5.11382	8.61284	0.00333801	0.0270419
ENSG00000112033	PPARD	peroxisome proliferator-activated receptor delta [Source:HGNC Symbol;Acc:9235]	0.382292	4.20214	8.60516	0.00335212	0.0271333
ENSG00000104341	LAPTM4B	lysosomal protein transmembrane 4 beta [Source:HGNC Symbol;Acc:13646]	0.173284	8.30924	8.60471	0.00335296	0.0271333
ENSG00000185068	GTF2H5	general transcription factor IIH, polypeptide 5 [Source:HGNC Symbol;Acc:21157]	-0.302091	5.12457	8.6029	0.00335628	0.0271453
ENSG00000142002	DPP9	dipeptidyl-peptidase 9 [Source:HGNC Symbol;Acc:18648]	0.336632	4.97012	8.6006	0.00336053	0.0271649
ENSG00000102796	DHRS12	dehydrogenase/reductase (SDR family) member 12 [Source:HGNC Symbol;Acc:25832]	-0.643119	1.83031	8.59639	0.0033683	0.0272129
ENSG00000179862	CITED4	Cbp/p300-interacting transactivator, with Glu/Asp-rich carboxy-terminal domain, 4 [Source:HGNC Symbol;Acc:18696]	-0.639249	1.76242	8.5947	0.00337143	0.0272178
ENSG00000121671	CRY2	cryptochrome 2 (photolyase-like) [Source:HGNC Symbol;Acc:2385]	0.402228	4.34374	8.59407	0.00337259	0.0272178
ENSG00000215475	SIAH3	siah E3 ubiquitin protein ligase family member 3 [Source:HGNC Symbol;Acc:30553]	-0.669092	1.49186	8.59248	0.00337555	0.0272268
ENSG00000160271	RALGDS	ral guanine nucleotide dissociation stimulator [Source:HGNC Symbol;Acc:9842]	0.250951	7.17156	8.58592	0.00338773	0.0273102
ENSG00000081870	HSPB11	heat shock protein family B (small), member 11 [Source:HGNC Symbol;Acc:25019]	-0.27355	5.29274	8.58329	0.00339263	0.0273348
ENSG00000117054	ACADM	acyl-CoA dehydrogenase, C-4 to C-12 straight chain [Source:HGNC Symbol;Acc:89]	-0.182949	7.60457	8.56544	0.00342605	0.0275778
ENSG00000102119	EMD	emerin [Source:HGNC Symbol;Acc:3331]	0.287223	5.32991	8.56519	0.00342651	0.0275778
ENSG00000149256	ODZ4	odz, odd Oz/ten-m homolog 4 (Drosophila) [Source:HGNC Symbol;Acc:29945]	-0.221221	5.97452	8.55941	0.00343741	0.0276364
ENSG00000185513	L3MBTL1	l(3)mbt-like 1 (Drosophila) [Source:HGNC Symbol;Acc:15905]	-0.494622	2.85547	8.55857	0.003439	0.0276364
ENSG00000105281	SLC1A5	solute carrier family 1 (neutral amino acid transporter), member 5 [Source:HGNC Symbol;Acc:10943]	0.279121	6.54793	8.55798	0.00344012	0.0276364
ENSG00000123836	PFKFB2	6-phosphofructo-2-kinase/fructose-2,6-biphosphatase 2 [Source:HGNC Symbol;Acc:8873]	-0.368347	4.13645	8.55738	0.00344125	0.0276364
ENSG00000130985	UBA1	ubiquitin-like modifier activating enzyme 1 [Source:HGNC Symbol;Acc:12469]	0.205246	7.97953	8.55589	0.00344406	0.0276431
ENSG00000254615	RP11-395G23.3		0.465413	3.13149	8.55496	0.00344583	0.0276431
ENSG00000250241	RP11-9G1.3		0.93288	0.607639	8.54836	0.00345834	0.0277225
ENSG00000141646	SMAD4	SMAD family member 4 [Source:HGNC Symbol;Acc:6770]	-0.182988	7.25956	8.54777	0.00345946	0.0277225
ENSG00000182173	TSEN54	tRNA splicing endonuclease 54 homolog (S. cerevisiae) [Source:HGNC Symbol;Acc:27561]	0.311135	5.0016	8.54224	0.00346997	0.0277917
ENSG00000109586	GALNT7	UDP-N-acetyl-alpha-D-galactosamine:polypeptide N-acetylgalactosaminyltransferase 7 (GalNAc-T7) [Source:HGNC Symbol;Acc:4129]	-0.245893	5.74848	8.53993	0.00347439	0.027812
ENSG00000180398	MCFD2	multiple coagulation factor deficiency 2 [Source:HGNC Symbol;Acc:18451]	0.182933	7.3509	8.5363	0.00348133	0.0278525
ENSG00000183569	SERHL2	serine hydrolase-like 2 [Source:HGNC Symbol;Acc:29446]	0.489285	3.04129	8.52487	0.00350326	0.0280128
ENSG00000155189	AGPAT5	1-acylglycerol-3-phosphate O-acyltransferase 5 (lysophosphatidic acid acyltransferase, epsilon) [Source:HGNC Symbol;Acc:20886]	0.197437	6.91161	8.52123	0.00351027	0.0280461
ENSG00000261342	AC006538.1		1.01917	0.785802	8.52075	0.0035112	0.0280461
ENSG00000003056	M6PR	mannose-6-phosphate receptor (cation dependent) [Source:HGNC Symbol;Acc:6752]	0.218876	6.19814	8.51778	0.00351694	0.0280768
ENSG00000163608	C3orf17	chromosome 3 open reading frame 17 [Source:HGNC Symbol;Acc:24496]	-0.211525	6.66598	8.51518	0.00352196	0.0281017
ENSG00000154832	CXXC1	CXXC finger protein 1 [Source:HGNC Symbol;Acc:24343]	0.325043	5.41246	8.51058	0.00353087	0.0281576
ENSG00000136270	TBRG4	transforming growth factor beta regulator 4 [Source:HGNC Symbol;Acc:17443]	0.254705	6.16727	8.50884	0.00353426	0.0281613
ENSG00000165689	SDCCAG3	serologically defined colon cancer antigen 3 [Source:HGNC Symbol;Acc:10667]	0.218007	6.22227	8.50762	0.00353662	0.0281613
ENSG00000114904	NEK4	NIMA (never in mitosis gene a)-related kinase 4 [Source:HGNC Symbol;Acc:11399]	0.245999	5.6773	8.5074	0.00353704	0.0281613
ENSG00000189221	MAOA	monoamine oxidase A [Source:HGNC Symbol;Acc:6833]	-0.401314	3.87014	8.50492	0.00354188	0.0281817
ENSG00000204304	PBX2	pre-B-cell leukemia homeobox 2 [Source:HGNC Symbol;Acc:8633]	-0.272587	5.56063	8.50413	0.00354341	0.0281817
ENSG00000174915	PTDSS2	phosphatidylserine synthase 2 [Source:HGNC Symbol;Acc:15463]	0.349355	4.64302	8.50059	0.00355032	0.0282215
ENSG00000076662	ICAM3	intercellular adhesion molecule 3 [Source:HGNC Symbol;Acc:5346]	0.96732	0.63606	8.49702	0.00355728	0.0282617
ENSG00000173153	ESRRA	estrogen-related receptor alpha [Source:HGNC Symbol;Acc:3471]	0.449969	3.6009	8.49515	0.00356094	0.0282756
ENSG00000235750	KIAA0040	KIAA0040 [Source:HGNC Symbol;Acc:28950]	-0.851395	1.38937	8.48633	0.00357825	0.0283978
ENSG00000161980	POLR3K	polymerase (RNA) III (DNA directed) polypeptide K, 12.3 kDa [Source:HGNC Symbol;Acc:14121]	0.273972	5.04776	8.48326	0.00358429	0.0284305
ENSG00000129968	FAM108A1	family with sequence similarity 108, member A1 [Source:HGNC Symbol;Acc:28756]	0.511656	2.7806	8.46686	0.00361675	0.0286713
ENSG00000197785	ATAD3A	ATPase family, AAA domain containing 3A [Source:HGNC Symbol;Acc:25567]	0.517221	3.30528	8.46585	0.00361876	0.0286713
ENSG00000134323	MYCN	v-myc myelocytomatosis viral related oncogene, neuroblastoma derived (avian) [Source:HGNC Symbol;Acc:7559]	-0.152221	9.51699	8.465	0.00362046	0.0286713
ENSG00000174804	FZD4	frizzled family receptor 4 [Source:HGNC Symbol;Acc:4042]	-0.315807	4.32454	8.45966	0.00363109	0.0287402
ENSG00000165801	ARHGEF40	Rho guanine nucleotide exchange factor (GEF) 40 [Source:HGNC Symbol;Acc:25516]	-0.477514	2.84414	8.45623	0.00363795	0.028779
ENSG00000068650	ATP11A	ATPase, class VI, type 11A [Source:HGNC Symbol;Acc:13552]	-0.235258	5.71858	8.4378	0.00367501	0.0290496
ENSG00000104164	BLOC1S6	biogenesis of lysosomal organelles complex-1, subunit 6, pallidin [Source:HGNC Symbol;Acc:8549]	-0.179053	7.75788	8.43716	0.00367631	0.0290496
ENSG00000158042	MRPL17	mitochondrial ribosomal protein L17 [Source:HGNC Symbol;Acc:14053]	0.275701	5.01353	8.4363	0.00367803	0.0290496
ENSG00000108055	SMC3	structural maintenance of chromosomes 3 [Source:HGNC Symbol;Acc:2468]	-0.164732	8.44993	8.43435	0.00368199	0.0290654
ENSG00000169228	RAB24	RAB24, member RAS oncogene family [Source:HGNC Symbol;Acc:9765]	0.686824	1.59814	8.43149	0.00368777	0.0290955
ENSG00000115241	PPM1G	protein phosphatase, Mg2+/Mn2+ dependent, 1G [Source:HGNC Symbol;Acc:9278]	0.18941	7.16381	8.42757	0.00369574	0.0291304
ENSG00000173546	CSPG4	chondroitin sulfate proteoglycan 4 [Source:HGNC Symbol;Acc:2466]	-0.750971	1.59645	8.42738	0.00369613	0.0291304
ENSG00000144118	RALB	v-ral simian leukemia viral oncogene homolog B (ras related; GTP binding protein) [Source:HGNC Symbol;Acc:9840]	-0.323118	4.54221	8.4263	0.00369833	0.0291322
ENSG00000105401	CDC37	cell division cycle 37 homolog (S. cerevisiae) [Source:HGNC Symbol;Acc:1735]	0.232505	6.49461	8.42032	0.0037105	0.0292125
ENSG00000088305	DNMT3B	DNA (cytosine-5-)-methyltransferase 3 beta [Source:HGNC Symbol;Acc:2979]	-0.338325	4.07194	8.41812	0.00371499	0.0292324
ENSG00000080815	PSEN1	presenilin 1 [Source:HGNC Symbol;Acc:9508]	-0.236462	5.78359	8.41269	0.0037261	0.0293042
ENSG00000143761	ARF1	ADP-ribosylation factor 1 [Source:HGNC Symbol;Acc:652]	0.203354	8.02361	8.4084	0.00373491	0.0293579
ENSG00000140743	CDR2	cerebellar degeneration-related protein 2, 62kDa [Source:HGNC Symbol;Acc:1799]	0.286783	5.15037	8.40659	0.00373862	0.0293715
ENSG00000166794	PPIB	peptidylprolyl isomerase B (cyclophilin B) [Source:HGNC Symbol;Acc:9255]	0.183246	6.97441	8.40399	0.00374399	0.029398
ENSG00000137494	ANKRD42	ankyrin repeat domain 42 [Source:HGNC Symbol;Acc:26752]	0.389986	3.64718	8.39854	0.00375523	0.0294628
ENSG00000261140	RP11-20I23.6		0.557704	2.401	8.39806	0.00375621	0.0294628
ENSG00000111596	CNOT2	CCR4-NOT transcription complex, subunit 2 [Source:HGNC Symbol;Acc:7878]	-0.205613	6.50484	8.38863	0.00377575	0.0295969
ENSG00000156535	CD109	CD109 molecule [Source:HGNC Symbol;Acc:21685]	-0.494294	2.98722	8.38787	0.00377733	0.0295969
ENSG00000259924	RP11-16E23.4		-1.63993	-0.371029	8.38692	0.0037793	0.0295969
ENSG00000166855	CLPX	ClpX caseinolytic peptidase X homolog (E. coli) [Source:HGNC Symbol;Acc:2088]	-0.210733	6.53478	8.38042	0.00379286	0.0296873
ENSG00000130226	DPP6	dipeptidyl-peptidase 6 [Source:HGNC Symbol;Acc:3010]	-0.407927	3.65483	8.37612	0.00380183	0.0297195
ENSG00000196378	ZNF34	zinc finger protein 34 [Source:HGNC Symbol;Acc:13098]	-0.575928	1.94092	8.37597	0.00380215	0.0297195
ENSG00000179331	RAB39A	RAB39A, member RAS oncogene family [Source:HGNC Symbol;Acc:16521]	0.387513	3.79867	8.3745	0.00380521	0.0297195
ENSG00000156482	RPL30	ribosomal protein L30 [Source:HGNC Symbol;Acc:10333]	0.160563	8.62561	8.37432	0.0038056	0.0297195
ENSG00000160124	CCDC58	coiled-coil domain containing 58 [Source:HGNC Symbol;Acc:31136]	0.258694	5.44466	8.37365	0.003807	0.0297195
ENSG00000129696	TTI2	TELO2 interacting protein 2 [Source:HGNC Symbol;Acc:26262]	0.338703	4.1794	8.35892	0.003838	0.0299457
ENSG00000125875	TBC1D20	TBC1 domain family, member 20 [Source:HGNC Symbol;Acc:16133]	0.231062	6.10548	8.35492	0.00384643	0.0299957
ENSG00000180801	ARSJ	arylsulfatase family, member J [Source:HGNC Symbol;Acc:26286]	0.390637	4.07563	8.34039	0.00387733	0.0302207
ENSG00000105329	TGFB1	transforming growth factor, beta 1 [Source:HGNC Symbol;Acc:11766]	-0.434963	3.04332	8.33927	0.00387972	0.0302235
ENSG00000119720	C14orf102	chromosome 14 open reading frame 102 [Source:HGNC Symbol;Acc:20186]	-0.347916	4.39388	8.33484	0.00388919	0.0302813
ENSG00000130518	KIAA1683	KIAA1683 [Source:HGNC Symbol;Acc:29350]	1.20432	0.30862	8.33056	0.00389837	0.0303368
ENSG00000022567	SLC45A4	solute carrier family 45, member 4 [Source:HGNC Symbol;Acc:29196]	0.377117	3.95878	8.31908	0.00392308	0.0305131
ENSG00000185787	MORF4L1	mortality factor 4 like 1 [Source:HGNC Symbol;Acc:16989]	-0.163947	9.11115	8.3141	0.00393385	0.0305755
ENSG00000179604	CDC42EP4	CDC42 effector protein (Rho GTPase binding) 4 [Source:HGNC Symbol;Acc:17147]	-0.294837	5.49688	8.31346	0.00393524	0.0305755
ENSG00000157064	NMNAT2	nicotinamide nucleotide adenylyltransferase 2 [Source:HGNC Symbol;Acc:16789]	-0.259515	5.65011	8.3111	0.00394035	0.0305992
ENSG00000175928	LRRN1	leucine rich repeat neuronal 1 [Source:HGNC Symbol;Acc:20980]	-0.175219	7.42725	8.30452	0.00395466	0.0306917
ENSG00000007080	CCDC124	coiled-coil domain containing 124 [Source:HGNC Symbol;Acc:25171]	0.357315	4.7707	8.30359	0.00395668	0.0306917
ENSG00000112578	BYSL	bystin-like [Source:HGNC Symbol;Acc:1157]	0.261037	5.81401	8.30276	0.00395848	0.0306917
ENSG00000180900	SCRIB	scribbled homolog (Drosophila) [Source:HGNC Symbol;Acc:30377]	0.327682	5.83365	8.30125	0.00396178	0.0307012
ENSG00000128973	CLN6	ceroid-lipofuscinosis, neuronal 6, late infantile, variant [Source:HGNC Symbol;Acc:2077]	0.26126	6.05704	8.29901	0.00396668	0.0307231
ENSG00000130734	ATG4D	autophagy related 4D, cysteine peptidase [Source:HGNC Symbol;Acc:20789]	0.423023	4.03641	8.298	0.00396888	0.030724
ENSG00000146085	MUT	methylmalonyl CoA mutase [Source:HGNC Symbol;Acc:7526]	-0.22902	5.93352	8.29033	0.00398568	0.030838
ENSG00000235859	AC006978.6		-0.573789	1.9938	8.28408	0.00399943	0.0309282
ENSG00000143368	SF3B4	splicing factor 3b, subunit 4, 49kDa [Source:HGNC Symbol;Acc:10771]	0.174773	7.91835	8.28165	0.00400477	0.0309534
ENSG00000204160	ZDHHC18	zinc finger, DHHC-type containing 18 [Source:HGNC Symbol;Acc:20712]	0.300777	5.28435	8.28033	0.00400769	0.0309598
ENSG00000179958	DCTPP1	dCTP pyrophosphatase 1 [Source:HGNC Symbol;Acc:28777]	0.249443	5.58842	8.27635	0.00401647	0.0310114
ENSG00000181894	ZNF329	zinc finger protein 329 [Source:HGNC Symbol;Acc:14209]	-0.453479	2.93415	8.27509	0.00401926	0.0310168
ENSG00000248019	FAM13A-AS1	FAM13A antisense RNA 1 [Source:HGNC Symbol;Acc:19370]	-1.1225	0.183083	8.26896	0.00403286	0.031105
ENSG00000108946	PRKAR1A	protein kinase, cAMP-dependent, regulatory, type I, alpha [Source:HGNC Symbol;Acc:9388]	-0.166134	8.97891	8.26805	0.00403489	0.031105
ENSG00000071553	ATP6AP1	ATPase, H+ transporting, lysosomal accessory protein 1 [Source:HGNC Symbol;Acc:868]	0.22767	6.19109	8.26637	0.00403863	0.0311061
ENSG00000135164	DMTF1	cyclin D binding myb-like transcription factor 1 [Source:HGNC Symbol;Acc:14603]	-0.179963	7.4106	8.26584	0.0040398	0.0311061
ENSG00000127838	PNKD	paroxysmal nonkinesigenic dyskinesia [Source:HGNC Symbol;Acc:9153]	0.33571	4.38555	8.26515	0.00404134	0.0311061
ENSG00000112149	CD83	CD83 molecule [Source:HGNC Symbol;Acc:1703]	-0.422362	3.56557	8.26373	0.0040445	0.0311143
ENSG00000141012	GALNS	galactosamine (N-acetyl)-6-sulfate sulfatase [Source:HGNC Symbol;Acc:4122]	0.532804	2.69738	8.2528	0.00406892	0.0312859
ENSG00000257315	ZBED6	zinc finger, BED-type containing 6 [Source:HGNC Symbol;Acc:33273]	-0.272598	5.30183	8.25063	0.00407378	0.031307
ENSG00000230733	AC092171.4		0.460898	3.60852	8.24145	0.00409443	0.0314447
ENSG00000116962	NID1	nidogen 1 [Source:HGNC Symbol;Acc:7821]	-0.216732	6.00426	8.24078	0.00409594	0.0314447
ENSG00000120328	PCDHB12	protocadherin beta 12 [Source:HGNC Symbol;Acc:8683]	-0.438801	3.20944	8.23394	0.00411141	0.0315471
ENSG00000156304	SCAF4	SR-related CTD-associated factor 4 [Source:HGNC Symbol;Acc:19304]	0.192965	6.82155	8.22962	0.00412122	0.031606
ENSG00000164741	DLC1	deleted in liver cancer 1 [Source:HGNC Symbol;Acc:2897]	-0.167324	7.54633	8.227	0.00412717	0.0316248
ENSG00000259787	CTB-85P21.2		1.16974	0.96153	8.22666	0.00412794	0.0316248
ENSG00000104522	TSTA3	tissue specific transplantation antigen P35B [Source:HGNC Symbol;Acc:12390]	0.361974	4.57618	8.21785	0.00414803	0.0317623
ENSG00000175274	TP53I11	tumor protein p53 inducible protein 11 [Source:HGNC Symbol;Acc:16842]	0.230673	6.70574	8.19867	0.00419212	0.0320617
ENSG00000139116	KIF21A	kinesin family member 21A [Source:HGNC Symbol;Acc:19349]	-0.158646	8.94972	8.19822	0.00419314	0.0320617
ENSG00000235823	LINC00263	long intergenic non-protein coding RNA 263 [Source:HGNC Symbol;Acc:28060]	0.522266	2.83328	8.19801	0.00419363	0.0320617
ENSG00000186364	NUDT17	nudix (nucleoside diphosphate linked moiety X)-type motif 17 [Source:HGNC Symbol;Acc:26618]	0.397513	4.18578	8.19561	0.00419918	0.0320875
ENSG00000164924	YWHAZ	tyrosine 3-monooxygenase/tryptophan 5-monooxygenase activation protein, zeta polypeptide [Source:HGNC Symbol;Acc:12855]	-0.153564	9.81981	8.1879	0.00421707	0.0322076
ENSG00000171055	FEZ2	fasciculation and elongation protein zeta 2 (zygin II) [Source:HGNC Symbol;Acc:3660]	-0.298632	4.76629	8.18525	0.00422323	0.032238
ENSG00000198561	CTNND1	catenin (cadherin-associated protein), delta 1 [Source:HGNC Symbol;Acc:2515]	-0.169761	7.56807	8.18062	0.00423404	0.0323039
ENSG00000165102	HGSNAT	heparan-alpha-glucosaminide N-acetyltransferase [Source:HGNC Symbol;Acc:26527]	-0.269983	5.14567	8.17268	0.0042526	0.0324181
ENSG00000159593	NAE1	NEDD8 activating enzyme E1 subunit 1 [Source:HGNC Symbol;Acc:621]	-0.204026	7.65712	8.17234	0.00425339	0.0324181
ENSG00000167693	NXN	nucleoredoxin [Source:HGNC Symbol;Acc:18008]	0.261417	5.39494	8.16986	0.00425923	0.032446
ENSG00000114626	ABTB1	ankyrin repeat and BTB (POZ) domain containing 1 [Source:HGNC Symbol;Acc:18275]	-1.30874	-0.165265	8.1687	0.00426195	0.03245
ENSG00000203705	TATDN3	TatD DNase domain containing 3 [Source:HGNC Symbol;Acc:27010]	-0.296906	4.94094	8.16516	0.00427027	0.0324967
ENSG00000224975	INE1	inactivation escape 1 (non-protein coding) [Source:HGNC Symbol;Acc:6060]	1.03294	0.321496	8.16218	0.0042773	0.0325334
ENSG00000006118	TMEM132A	transmembrane protein 132A [Source:HGNC Symbol;Acc:31092]	0.292818	6.95989	8.15534	0.00429346	0.0326395
ENSG00000137074	APTX	aprataxin [Source:HGNC Symbol;Acc:15984]	0.2512	5.56349	8.14793	0.00431103	0.0327563
ENSG00000166111	SVOP	SV2 related protein homolog (rat) [Source:HGNC Symbol;Acc:25417]	0.6939	1.65023	8.14246	0.00432405	0.0328372
ENSG00000146576	C7orf26	chromosome 7 open reading frame 26 [Source:HGNC Symbol;Acc:21702]	0.299973	5.01053	8.1416	0.00432611	0.0328372
ENSG00000137770	CTDSPL2	CTD (carboxy-terminal domain, RNA polymerase II, polypeptide A) small phosphatase like 2 [Source:HGNC Symbol;Acc:26936]	-0.182782	7.75638	8.13066	0.00435229	0.0330031
ENSG00000166411	IDH3A	isocitrate dehydrogenase 3 (NAD+) alpha [Source:HGNC Symbol;Acc:5384]	0.305078	4.73341	8.1306	0.00435243	0.0330031
ENSG00000137414	FAM8A1	family with sequence similarity 8, member A1 [Source:HGNC Symbol;Acc:16372]	-0.233131	6.16065	8.12864	0.00435713	0.0330219
ENSG00000008710	PKD1	polycystic kidney disease 1 (autosomal dominant) [Source:HGNC Symbol;Acc:9008]	0.328931	5.33794	8.12232	0.00437235	0.0331119
ENSG00000137955	RABGGTB	Rab geranylgeranyltransferase, beta subunit [Source:HGNC Symbol;Acc:9796]	0.171408	8.01789	8.12186	0.00437347	0.0331119
ENSG00000179094	PER1	period homolog 1 (Drosophila) [Source:HGNC Symbol;Acc:8845]	0.356154	4.83811	8.12055	0.00437663	0.0331188
ENSG00000143079	CTTNBP2NL	CTTNBP2 N-terminal like [Source:HGNC Symbol;Acc:25330]	-0.222818	5.94994	8.11958	0.00437897	0.0331196
ENSG00000100490	CDKL1	cyclin-dependent kinase-like 1 (CDC2-related kinase) [Source:HGNC Symbol;Acc:1781]	-0.63866	1.96633	8.11833	0.00438199	0.0331255
ENSG00000130479	MAP1S	microtubule-associated protein 1S [Source:HGNC Symbol;Acc:15715]	0.45933	3.85892	8.11548	0.00438889	0.0331607
ENSG00000105723	GSK3A	glycogen synthase kinase 3 alpha [Source:HGNC Symbol;Acc:4616]	0.233048	6.40929	8.10445	0.00441568	0.0333462
ENSG00000182674	KCNB2	potassium voltage-gated channel, Shab-related subfamily, member 2 [Source:HGNC Symbol;Acc:6232]	-0.265194	5.15288	8.09519	0.00443828	0.0334827
ENSG00000122515	ZMIZ2	zinc finger, MIZ-type containing 2 [Source:HGNC Symbol;Acc:22229]	0.350542	4.72546	8.09519	0.00443828	0.0334827
ENSG00000132952	USPL1	ubiquitin specific peptidase like 1 [Source:HGNC Symbol;Acc:20294]	0.239071	5.98011	8.09214	0.00444575	0.033522
ENSG00000159322	ADPGK	ADP-dependent glucokinase [Source:HGNC Symbol;Acc:25250]	0.173067	7.33351	8.09063	0.00444948	0.0335277
ENSG00000138688	KIAA1109	KIAA1109 [Source:HGNC Symbol;Acc:26953]	-0.180867	7.21107	8.08999	0.00445104	0.0335277
ENSG00000229921	KIF25-AS1	KIF25 antisense RNA 1 [Source:HGNC Symbol;Acc:20953]	-0.89895	0.780191	8.08834	0.0044551	0.033529
ENSG00000198435	NRARP	NOTCH-regulated ankyrin repeat protein [Source:HGNC Symbol;Acc:33843]	-0.416612	3.39236	8.08808	0.00445574	0.033529
ENSG00000184162	NR2C2AP	nuclear receptor 2C2-associated protein [Source:HGNC Symbol;Acc:30763]	0.388994	3.70672	8.08618	0.00446042	0.0335471
ENSG00000170515	PA2G4	proliferation-associated 2G4, 38kDa [Source:HGNC Symbol;Acc:8550]	0.163046	7.79631	8.0807	0.00447392	0.0336316
ENSG00000166548	TK2	thymidine kinase 2, mitochondrial [Source:HGNC Symbol;Acc:11831]	-0.454311	2.817	8.07049	0.00449918	0.0337949
ENSG00000169105	CHST14	carbohydrate (N-acetylgalactosamine 4-0) sulfotransferase 14 [Source:HGNC Symbol;Acc:24464]	-0.343327	4.00274	8.07008	0.0045002	0.0337949
ENSG00000204177	BMS1P1	BMS1 pseudogene 1 [Source:HGNC Symbol;Acc:23649]	-0.372326	4.26867	8.06895	0.00450301	0.0337988
ENSG00000255198	SNHG9	small nucleolar RNA host gene 9 (non-protein coding) [Source:HGNC Symbol;Acc:33102]	1.00588	0.617332	8.05879	0.00452835	0.0339718
ENSG00000125826	RBCK1	RanBP-type and C3HC4-type zinc finger containing 1 [Source:HGNC Symbol;Acc:15864]	0.368633	4.07629	8.05657	0.00453389	0.0339961
ENSG00000110422	HIPK3	homeodomain interacting protein kinase 3 [Source:HGNC Symbol;Acc:4915]	-0.262979	5.5171	8.05346	0.00454167	0.0340373
ENSG00000160072	ATAD3B	ATPase family, AAA domain containing 3B [Source:HGNC Symbol;Acc:24007]	0.46225	3.93748	8.04149	0.0045718	0.0342457
ENSG00000151338	MIPOL1	mirror-image polydactyly 1 [Source:HGNC Symbol;Acc:21460]	-0.279551	5.40247	8.03936	0.00457717	0.0342686
ENSG00000124523	SIRT5	sirtuin 5 [Source:HGNC Symbol;Acc:14933]	-0.465333	2.83349	8.0363	0.00458491	0.0343092
ENSG00000112773	FAM46A	family with sequence similarity 46, member A [Source:HGNC Symbol;Acc:18345]	-0.335986	4.23355	8.03534	0.00458733	0.03431
ENSG00000085224	ATRX	alpha thalassemia/mental retardation syndrome X-linked [Source:HGNC Symbol;Acc:886]	-0.16256	8.28126	8.03241	0.00459477	0.0343329
ENSG00000106404	CLDN15	claudin 15 [Source:HGNC Symbol;Acc:2036]	0.547907	3.01068	8.03189	0.00459608	0.0343329
ENSG00000102144	PGK1	phosphoglycerate kinase 1 [Source:HGNC Symbol;Acc:8896]	0.151828	9.00754	8.03139	0.00459735	0.0343329
ENSG00000242372	EIF6	eukaryotic translation initiation factor 6 [Source:HGNC Symbol;Acc:6159]	0.304342	5.14453	8.02756	0.00460709	0.0343842
ENSG00000012048	BRCA1	breast cancer 1, early onset [Source:HGNC Symbol;Acc:1100]	-0.169645	7.67064	8.02683	0.00460893	0.0343842
ENSG00000183337	BCOR	BCL6 corepressor [Source:HGNC Symbol;Acc:20893]	-0.214415	6.38312	8.02595	0.00461119	0.0343842
ENSG00000106348	IMPDH1	IMP (inosine 5'-monophosphate) dehydrogenase 1 [Source:HGNC Symbol;Acc:6052]	0.298328	5.11597	8.0247	0.00461436	0.0343905
ENSG00000147050	KDM6A	lysine (K)-specific demethylase 6A [Source:HGNC Symbol;Acc:12637]	-0.27659	5.41098	8.02136	0.00462289	0.0344368
ENSG00000213024	NUP62	nucleoporin 62kDa [Source:HGNC Symbol;Acc:8066]	0.203932	7.14332	8.01571	0.00463732	0.034527
ENSG00000085491	SLC25A24	solute carrier family 25 (mitochondrial carrier; phosphate carrier), member 24 [Source:HGNC Symbol;Acc:20662]	-0.201019	7.28178	8.00952	0.0046532	0.0346265
ENSG00000054267	ARID4B	AT rich interactive domain 4B (RBP1-like) [Source:HGNC Symbol;Acc:15550]	-0.190507	6.95294	8.00868	0.00465537	0.0346265
[truncated: 297 more rows]
