# Supplementary material for: GSK3 Inhibitors Regulate MYCN mRNA Levels and Reduce Neuroblastoma Cell Viability through Multiple Mechanisms, Including p53 and Wnt Signaling
Source: Oxford University Press journal article supplement (doi:10.1158/1535-7163.mct-13-0560-t), 2013-11-27
Supplement: 15357163mct130560t-sup-tab_4c.xlsx [file 15357163mct130560t-sup-tab_4c.xlsx]

## Sheet: imr32-c.vs.bio.txt
Sample Info:	IMR32 cells. Control Vs. 24h BIO-acetoxime
Sequencing:	Illumina GA IIx, read length: 42 bp, paired-end mRNA sequencing
Mapping:	aligned with TopHat v2.0.7 to GRCh37 (hg19)
Summarization:	Htseq-count
Method for differential gene expression analysis:	General linear model (GLM) in edgeR (R/bioconductor) based on filtered count data, fit: ~treatment
Multiple testing correction:	Benjamini-Hochberg
Gene expression unit:	CPMkb: counts per million per genelength in kilobases
Table:	Differentially expressed genes: Bio vs Control
Ensembl ID	Gene Symbol	Description	log2FC	logCPM	LR	PValue	Corrected Pvalue
ENSG00000127863	TNFRSF19	tumor necrosis factor receptor superfamily, member 19 [Source:HGNC Symbol;Acc:11915]	5.26634	6.10849	2611.97	0	0
ENSG00000099250	NRP1	neuropilin 1 [Source:HGNC Symbol;Acc:8004]	3.81855	6.92593	2442.91	0	0
ENSG00000261685	RP11-401P9.4		5.39342	5.00884	1443.86	6.17777153943788e-316	3.04955395758287e-312
ENSG00000140807	NKD1	naked cuticle homolog 1 (Drosophila) [Source:HGNC Symbol;Acc:17045]	5.1736	5.46033	1428.12	1.62957736756623e-312	0
ENSG00000080644	CHRNA3	cholinergic receptor, nicotinic, alpha 3 (neuronal) [Source:HGNC Symbol;Acc:1957]	-2.78481	7.53081	1316.47	2.97935e-288	8.82423e-285
ENSG00000008256	CYTH3	cytohesin 3 [Source:HGNC Symbol;Acc:9504]	2.9685	6.37389	1315.33	5.2812e-288	1.30349e-284
ENSG00000163132	MSX1	msh homeobox 1 [Source:HGNC Symbol;Acc:7391]	4.5295	5.61739	1273.53	6.39315e-279	1.35252e-275
ENSG00000260560	-		5.24715	4.82923	1195.43	6.01745e-262	1.11391e-258
ENSG00000168646	AXIN2	axin 2 [Source:HGNC Symbol;Acc:904]	2.85288	5.9341	941.693	8.48294e-207	1.39582e-203
ENSG00000162490	DRAXIN	dorsal inhibitory axon guidance protein [Source:HGNC Symbol;Acc:25054]	-2.57683	5.88	913.088	1.40167e-200	2.07573e-197
ENSG00000196776	CD47	CD47 molecule [Source:HGNC Symbol;Acc:1682]	1.95541	7.44157	864.878	4.238e-190	5.7055e-187
ENSG00000143153	ATP1B1	ATPase, Na+/K+ transporting, beta 1 polypeptide [Source:HGNC Symbol;Acc:804]	1.82602	8.08334	810.265	3.16469e-178	3.90549e-175
ENSG00000064300	NGFR	nerve growth factor receptor [Source:HGNC Symbol;Acc:7809]	6.60214	3.97278	748.77	7.42596e-165	8.45931e-162
ENSG00000135048	TMEM2	transmembrane protein 2 [Source:HGNC Symbol;Acc:11869]	2.07483	6.22534	741.967	2.23947e-163	2.36888e-160
ENSG00000130707	ASS1	argininosuccinate synthase 1 [Source:HGNC Symbol;Acc:758]	-1.97732	8.42073	718.136	3.40323e-158	3.35989e-155
ENSG00000213949	ITGA1	integrin, alpha 1 [Source:HGNC Symbol;Acc:6134]	-2.09655	5.90974	669.862	1.07076e-147	9.91051e-145
ENSG00000139352	ASCL1	achaete-scute complex homolog 1 (Drosophila) [Source:HGNC Symbol;Acc:738]	-1.64397	7.21233	669.393	1.3541e-147	1.17958e-144
ENSG00000172403	SYNPO2	synaptopodin 2 [Source:HGNC Symbol;Acc:17732]	-3.14784	4.63955	661.376	7.50115e-146	6.17136e-143
ENSG00000114446	IFT57	intraflagellar transport 57 homolog (Chlamydomonas) [Source:HGNC Symbol;Acc:17367]	2.11467	5.96745	642.735	8.49396e-142	6.62037e-139
ENSG00000099139	PCSK5	proprotein convertase subtilisin/kexin type 5 [Source:HGNC Symbol;Acc:8747]	3.44542	3.99396	607.647	3.63486e-134	2.69143e-131
ENSG00000170153	RNF150	ring finger protein 150 [Source:HGNC Symbol;Acc:23138]	1.84399	6.39099	602.872	3.97317e-133	2.80184e-130
ENSG00000162374	ELAVL4	ELAV (embryonic lethal, abnormal vision, Drosophila)-like 4 [Source:HGNC Symbol;Acc:3315]	-1.49055	7.8686	602.403	5.02513e-133	3.3826e-130
ENSG00000049323	LTBP1	latent transforming growth factor beta binding protein 1 [Source:HGNC Symbol;Acc:6714]	2.43362	5.75481	579.045	6.05103e-128	3.89608e-125
ENSG00000164938	TP53INP1	tumor protein p53 inducible nuclear protein 1 [Source:HGNC Symbol;Acc:18022]	-1.56822	7.22116	559.684	9.84644e-124	6.07566e-121
ENSG00000137502	RAB30	RAB30, member RAS oncogene family [Source:HGNC Symbol;Acc:9770]	-1.44933	7.4613	553.221	2.50751e-122	1.48535e-119
ENSG00000151835	SACS	spastic ataxia of Charlevoix-Saguenay (sacsin) [Source:HGNC Symbol;Acc:10519]	1.24574	8.93298	521.862	1.66529e-115	9.48513e-113
ENSG00000165186	PTCHD1	patched domain containing 1 [Source:HGNC Symbol;Acc:26392]	1.77046	6.1768	518.17	1.05863e-114	5.80638e-112
ENSG00000196167	C11orf92	chromosome 11 open reading frame 92 [Source:HGNC Symbol;Acc:33789]	-3.05904	4.07646	502.189	3.17462e-111	1.67903e-108
ENSG00000188554	NBR1	neighbor of BRCA1 gene 1 [Source:HGNC Symbol;Acc:6746]	-1.57929	6.89858	501.596	4.27365e-111	2.18236e-108
ENSG00000150593	PDCD4	programmed cell death 4 (neoplastic transformation inhibitor) [Source:HGNC Symbol;Acc:8763]	-2.11982	5.28042	499.539	1.19744e-110	5.91097e-108
ENSG00000106484	MEST	mesoderm specific transcript homolog (mouse) [Source:HGNC Symbol;Acc:7028]	1.57307	6.95205	497.009	4.2544e-110	2.03237e-107
ENSG00000114796	KLHL24	kelch-like 24 (Drosophila) [Source:HGNC Symbol;Acc:25947]	-2.39556	4.91278	494.75	1.31882e-109	6.10325e-107
ENSG00000113389	NPR3	natriuretic peptide receptor C/guanylate cyclase C (atrionatriuretic peptide receptor C) [Source:HGNC Symbol;Acc:7945]	5.15675	3.07991	487.058	6.2214e-108	2.7919e-105
ENSG00000152377	SPOCK1	sparc/osteonectin, cwcv and kazal-like domains proteoglycan (testican) 1 [Source:HGNC Symbol;Acc:11251]	2.40285	4.74025	484.598	2.13425e-107	9.29591e-105
ENSG00000124942	AHNAK	AHNAK nucleoprotein [Source:HGNC Symbol;Acc:347]	-1.23478	9.1761	475.903	1.66403e-105	7.04073e-103
ENSG00000139946	PELI2	pellino E3 ubiquitin protein ligase family member 2 [Source:HGNC Symbol;Acc:8828]	-1.66059	6.25904	473.751	4.8929e-105	2.01275e-102
ENSG00000182718	ANXA2	annexin A2 [Source:HGNC Symbol;Acc:537]	-1.35452	7.25789	469.021	5.23465e-104	2.09514e-101
ENSG00000050438	SLC4A8	solute carrier family 4, sodium bicarbonate cotransporter, member 8 [Source:HGNC Symbol;Acc:11034]	-2.08085	5.84658	455.308	5.04571e-101	1.96637e-98
ENSG00000117971	CHRNB4	cholinergic receptor, nicotinic, beta 4 (neuronal) [Source:HGNC Symbol;Acc:1964]	-3.31931	4.89362	442.678	2.82953e-98	1.07443e-95
ENSG00000173714	WFIKKN2	WAP, follistatin/kazal, immunoglobulin, kunitz and netrin domain containing 2 [Source:HGNC Symbol;Acc:30916]	1.6289	6.8815	439.781	1.20783e-97	4.47169e-95
ENSG00000134853	PDGFRA	platelet-derived growth factor receptor, alpha polypeptide [Source:HGNC Symbol;Acc:8803]	-2.14443	5.52119	438.584	2.20055e-97	7.94829e-95
ENSG00000181019	NQO1	NAD(P)H dehydrogenase, quinone 1 [Source:HGNC Symbol;Acc:2874]	-2.24215	5.39378	424.604	2.42905e-94	8.5647e-92
ENSG00000100604	CHGA	chromogranin A (parathyroid secretory protein 1) [Source:HGNC Symbol;Acc:1929]	-1.86847	6.01074	424.341	2.77047e-94	9.54137e-92
ENSG00000112902	SEMA5A	sema domain, seven thrombospondin repeats (type 1 and type 1-like), transmembrane domain (TM) and short cytoplasmic domain, (semaphorin) 5A [Source:HGNC Symbol;Acc:10736]	1.77374	5.60122	420.032	2.40122e-93	8.08175e-91
ENSG00000188452	CERKL	ceramide kinase-like [Source:HGNC Symbol;Acc:21699]	-1.46573	6.61441	415.815	1.9878e-92	6.54163e-90
ENSG00000244405	ETV5	ets variant 5 [Source:HGNC Symbol;Acc:3494]	-2.77453	4.57306	403.639	8.88898e-90	2.86167e-87
ENSG00000149527	PLCH2	phospholipase C, eta 2 [Source:HGNC Symbol;Acc:29037]	3.49302	3.96704	402.049	1.97243e-89	6.21484e-87
ENSG00000196781	TLE1	transducin-like enhancer of split 1 (E(sp1) homolog, Drosophila) [Source:HGNC Symbol;Acc:11837]	1.92242	5.68507	397.579	1.85333e-88	5.71791e-86
ENSG00000163346	PBXIP1	pre-B-cell leukemia homeobox interacting protein 1 [Source:HGNC Symbol;Acc:21199]	-1.86407	6.02109	392.637	2.20713e-87	6.67049e-85
ENSG00000168209	DDIT4	DNA-damage-inducible transcript 4 [Source:HGNC Symbol;Acc:24944]	1.71103	6.26273	390.959	5.11841e-87	1.51597e-84
ENSG00000164684	ZNF704	zinc finger protein 704 [Source:HGNC Symbol;Acc:32291]	-1.39153	6.46888	374.589	1.87478e-83	5.44384e-81
ENSG00000184347	SLIT3	slit homolog 3 (Drosophila) [Source:HGNC Symbol;Acc:11087]	-1.47143	6.62019	362.17	9.48715e-81	2.70183e-78
ENSG00000197852	FAM212B	family with sequence similarity 212, member B [Source:HGNC Symbol;Acc:28045]	1.30436	7.12016	357.034	1.24563e-79	3.48049e-77
ENSG00000115758	ODC1	ornithine decarboxylase 1 [Source:HGNC Symbol;Acc:8109]	0.972594	9.23104	354.195	5.17273e-79	1.41857e-76
ENSG00000121966	CXCR4	chemokine (C-X-C motif) receptor 4 [Source:HGNC Symbol;Acc:2561]	-2.58952	4.21541	352.072	1.49947e-78	4.03739e-76
ENSG00000152409	JMY	junction mediating and regulatory protein, p53 cofactor [Source:HGNC Symbol;Acc:28916]	-1.43533	6.08203	350.014	4.20889e-78	1.11303e-75
ENSG00000151012	SLC7A11	solute carrier family 7 (anionic amino acid transporter light chain, xc- system), member 11 [Source:HGNC Symbol;Acc:11059]	1.6229	5.94112	349.087	6.69856e-78	1.74033e-75
ENSG00000166482	MFAP4	microfibrillar-associated protein 4 [Source:HGNC Symbol;Acc:7035]	-1.37723	7.37603	343.593	1.05302e-76	2.68864e-74
ENSG00000111859	NEDD9	neural precursor cell expressed, developmentally down-regulated 9 [Source:HGNC Symbol;Acc:7733]	-2.1417	4.55403	334.33	1.09604e-74	2.75106e-72
ENSG00000122012	SV2C	synaptic vesicle glycoprotein 2C [Source:HGNC Symbol;Acc:30670]	2.01753	4.91484	327.247	3.82355e-73	9.43717e-71
ENSG00000070669	ASNS	asparagine synthetase (glutamine-hydrolyzing) [Source:HGNC Symbol;Acc:753]	1.14643	7.14299	325.4	9.65488e-73	2.34392e-70
ENSG00000013293	SLC7A14	solute carrier family 7 (orphan transporter), member 14 [Source:HGNC Symbol;Acc:29326]	2.08459	4.47785	321.065	8.49092e-72	2.0281e-69
ENSG00000164099	PRSS12	protease, serine, 12 (neurotrypsin, motopsin) [Source:HGNC Symbol;Acc:9477]	-1.06569	8.61425	311.731	9.16548e-70	2.15447e-67
ENSG00000171940	ZNF217	zinc finger protein 217 [Source:HGNC Symbol;Acc:13009]	-1.26395	6.53168	309.584	2.69068e-69	6.22599e-67
ENSG00000144229	THSD7B	thrombospondin, type I, domain containing 7B [Source:HGNC Symbol;Acc:29348]	-1.57728	5.68319	308.886	3.81943e-69	8.70183e-67
ENSG00000151892	GFRA1	GDNF family receptor alpha 1 [Source:HGNC Symbol;Acc:4243]	-1.30927	6.19759	306.689	1.14964e-68	2.57954e-66
ENSG00000136111	TBC1D4	TBC1 domain family, member 4 [Source:HGNC Symbol;Acc:19165]	1.66092	5.14588	287.68	1.59237e-64	3.51962e-62
ENSG00000150961	SEC24D	SEC24 family, member D (S. cerevisiae) [Source:HGNC Symbol;Acc:10706]	-1.31538	6.20491	287.423	1.81136e-64	3.94477e-62
ENSG00000180354	C7orf41	chromosome 7 open reading frame 41 [Source:HGNC Symbol;Acc:25457]	-1.68492	5.14443	286.429	2.98249e-64	6.40111e-62
ENSG00000174145	KIAA1239	KIAA1239 [Source:HGNC Symbol;Acc:29229]	-1.99729	4.58017	285.654	4.4017e-64	9.31211e-62
ENSG00000117600	RP4-788L13.1	Lipid phosphate phosphatase-related protein type 4 [Source:UniProtKB/Swiss-Prot;Acc:Q7Z2D5]	1.26229	6.65585	284.883	6.47815e-64	1.3512e-61
ENSG00000116044	NFE2L2	nuclear factor (erythroid-derived 2)-like 2 [Source:HGNC Symbol;Acc:7782]	-1.11105	7.30012	284.615	7.4131e-64	1.52473e-61
ENSG00000133401	PDZD2	PDZ domain containing 2 [Source:HGNC Symbol;Acc:18486]	-3.95919	2.56946	284.5	7.85182e-64	1.59284e-61
ENSG00000136859	ANGPTL2	angiopoietin-like 2 [Source:HGNC Symbol;Acc:490]	1.75673	5.17176	284.401	8.25084e-64	1.65117e-61
ENSG00000175155	YPEL2	yippee-like 2 (Drosophila) [Source:HGNC Symbol;Acc:18326]	-1.64806	5.19006	284.312	8.62738e-64	1.7035e-61
ENSG00000172380	GNG12	guanine nucleotide binding protein (G protein), gamma 12 [Source:HGNC Symbol;Acc:19663]	-1.07893	7.54832	283.902	1.0598e-63	2.06508e-61
ENSG00000165072	MAMDC2	MAM domain containing 2 [Source:HGNC Symbol;Acc:23673]	-2.43342	3.50762	267.614	3.75708e-60	7.22579e-58
ENSG00000104765	BNIP3L	BCL2/adenovirus E1B 19kDa interacting protein 3-like [Source:HGNC Symbol;Acc:1085]	-1.33393	6.30732	265.197	1.26408e-59	2.39996e-57
ENSG00000163050	ADCK3	aarF domain containing kinase 3 [Source:HGNC Symbol;Acc:16812]	-1.53707	5.65897	263.267	3.3291e-59	6.24058e-57
ENSG00000119314	PTBP3	polypyrimidine tract binding protein 3 [Source:HGNC Symbol;Acc:10253]	1.09666	6.88531	261.668	7.42952e-59	1.3753e-56
ENSG00000143355	LHX9	LIM homeobox 9 [Source:HGNC Symbol;Acc:14222]	1.25707	6.03056	260.397	1.40575e-58	2.57009e-56
ENSG00000100505	TRIM9	tripartite motif containing 9 [Source:HGNC Symbol;Acc:16288]	1.83043	4.50546	259.133	2.65221e-58	4.78983e-56
ENSG00000048052	HDAC9	histone deacetylase 9 [Source:HGNC Symbol;Acc:14065]	1.84897	4.394	257.267	6.76355e-58	1.20676e-55
ENSG00000171617	ENC1	ectodermal-neural cortex 1 (with BTB-like domain) [Source:HGNC Symbol;Acc:3345]	-1.11726	6.50239	256.234	1.13611e-57	2.00294e-55
ENSG00000121068	TBX2	T-box 2 [Source:HGNC Symbol;Acc:11597]	-1.49888	7.47728	255.945	1.31325e-57	2.288e-55
ENSG00000153993	SEMA3D	sema domain, immunoglobulin domain (Ig), short basic domain, secreted, (semaphorin) 3D [Source:HGNC Symbol;Acc:10726]	3.71258	2.19068	255.202	1.90727e-57	3.28428e-55
ENSG00000149294	NCAM1	neural cell adhesion molecule 1 [Source:HGNC Symbol;Acc:7656]	-1.07739	6.70281	252.869	6.1521e-57	1.0472e-54
ENSG00000107282	APBA1	amyloid beta (A4) precursor protein-binding, family A, member 1 [Source:HGNC Symbol;Acc:578]	-1.73498	5.24746	250.133	2.42876e-56	4.08721e-54
ENSG00000183654	MARCH11	membrane-associated ring finger (C3HC4) 11 [Source:HGNC Symbol;Acc:33609]	-2.3476	3.51105	249.807	2.86107e-56	4.76063e-54
ENSG00000111897	SERINC1	serine incorporator 1 [Source:HGNC Symbol;Acc:13464]	-1.04739	7.70824	249.313	3.66644e-56	6.03293e-54
ENSG00000103546	SLC6A2	solute carrier family 6 (neurotransmitter transporter, noradrenalin), member 2 [Source:HGNC Symbol;Acc:11048]	-1.33535	5.92887	248.468	5.6042e-56	9.12006e-54
ENSG00000061337	LZTS1	leucine zipper, putative tumor suppressor 1 [Source:HGNC Symbol;Acc:13861]	1.57116	5.12854	238.408	8.74581e-54	1.40779e-51
ENSG00000165521	EML5	echinoderm microtubule associated protein like 5 [Source:HGNC Symbol;Acc:18197]	-1.01569	6.78501	237.285	1.53726e-53	2.44787e-51
ENSG00000010278	CD9	CD9 molecule [Source:HGNC Symbol;Acc:1709]	-3.16808	2.26818	236.853	1.90952e-53	3.00831e-51
ENSG00000147852	VLDLR	very low density lipoprotein receptor [Source:HGNC Symbol;Acc:12698]	1.74996	4.74986	236.039	2.87386e-53	4.4799e-51
ENSG00000231991	ANXA2P2	annexin A2 pseudogene 2 [Source:HGNC Symbol;Acc:539]	-1.28738	5.67006	232.645	1.57957e-52	2.43666e-50
ENSG00000163297	ANTXR2	anthrax toxin receptor 2 [Source:HGNC Symbol;Acc:21732]	-0.940283	7.77067	231.962	2.22597e-52	3.39839e-50
ENSG00000171729	TMEM51	transmembrane protein 51 [Source:HGNC Symbol;Acc:25488]	2.46019	3.37016	229.818	6.53262e-52	9.87159e-50
ENSG00000196482	ESRRG	estrogen-related receptor gamma [Source:HGNC Symbol;Acc:3474]	-1.15393	6.10644	229.38	8.13841e-52	1.21739e-49
ENSG00000168546	GFRA2	GDNF family receptor alpha 2 [Source:HGNC Symbol;Acc:4244]	-1.05505	7.17723	227.876	1.73202e-51	2.56494e-49
ENSG00000053438	NNAT	neuronatin [Source:HGNC Symbol;Acc:7860]	-0.903835	8.69749	227.729	1.86445e-51	2.73373e-49
ENSG00000145934	ODZ2	odz, odd Oz/ten-m homolog 2 (Drosophila) [Source:HGNC Symbol;Acc:29943]	3.44683	2.0671	225.293	6.3371e-51	9.2006e-49
ENSG00000111875	ASF1A	ASF1 anti-silencing function 1 homolog A (S. cerevisiae) [Source:HGNC Symbol;Acc:20995]	-1.07324	6.70305	223.826	1.32372e-50	1.9032e-48
ENSG00000114126	TFDP2	transcription factor Dp-2 (E2F dimerization partner 2) [Source:HGNC Symbol;Acc:11751]	-0.952502	7.16089	222.935	2.07124e-50	2.94932e-48
ENSG00000117069	ST6GALNAC5	ST6 (alpha-N-acetyl-neuraminyl-2,3-beta-galactosyl-1,3)-N-acetylgalactosaminide alpha-2,6-sialyltransferase 5 [Source:HGNC Symbol;Acc:19342]	-1.31572	5.46824	221.458	4.34802e-50	6.13236e-48
ENSG00000140280	LYSMD2	LysM, putative peptidoglycan-binding, domain containing 2 [Source:HGNC Symbol;Acc:28571]	1.95736	4.36004	219.504	1.16019e-49	1.62088e-47
ENSG00000164104	HMGB2	high mobility group box 2 [Source:HGNC Symbol;Acc:5000]	-0.800659	9.10529	217.828	2.69311e-49	3.72732e-47
ENSG00000175040	CHST2	carbohydrate (N-acetylglucosamine-6-O) sulfotransferase 2 [Source:HGNC Symbol;Acc:1970]	-1.27949	6.24191	215.42	9.0232e-49	1.23726e-46
ENSG00000185262	FAM100B	family with sequence similarity 100, member B [Source:HGNC Symbol;Acc:28438]	-2.56873	3.06563	214.903	1.17029e-48	1.58999e-46
ENSG00000114742	WDR48	WD repeat domain 48 [Source:HGNC Symbol;Acc:30914]	-0.994495	6.66519	213.685	2.1579e-48	2.90512e-46
ENSG00000112715	VEGFA	vascular endothelial growth factor A [Source:HGNC Symbol;Acc:12680]	1.66762	5.15535	213.5	2.36729e-48	3.15831e-46
ENSG00000119547	ONECUT2	one cut homeobox 2 [Source:HGNC Symbol;Acc:8139]	0.957753	7.47887	213.143	2.83231e-48	3.74497e-46
ENSG00000103540	CCP110	centriolar coiled coil protein 110kDa [Source:HGNC Symbol;Acc:24342]	0.916148	7.94749	211.845	5.4364e-48	7.12457e-46
ENSG00000139289	PHLDA1	pleckstrin homology-like domain, family A, member 1 [Source:HGNC Symbol;Acc:8933]	1.53769	5.01335	211.534	6.35742e-48	8.25852e-46
ENSG00000166257	SCN3B	sodium channel, voltage-gated, type III, beta subunit [Source:HGNC Symbol;Acc:20665]	-1.30451	5.79565	211.037	8.16001e-48	1.0508e-45
ENSG00000164674	SYTL3	synaptotagmin-like 3 [Source:HGNC Symbol;Acc:15587]	-2.08502	3.6108	208.022	3.70953e-47	4.73573e-45
ENSG00000204103	MAFB	v-maf musculoaponeurotic fibrosarcoma oncogene homolog B (avian) [Source:HGNC Symbol;Acc:6408]	-2.58475	3.17523	206.695	7.22747e-47	9.148e-45
ENSG00000157600	TMEM164	transmembrane protein 164 [Source:HGNC Symbol;Acc:26217]	-1.09372	6.33691	206.085	9.81864e-47	1.23224e-44
ENSG00000162992	NEUROD1	neuronal differentiation 1 [Source:HGNC Symbol;Acc:7762]	-0.831955	8.11825	205.65	1.22147e-46	1.52007e-44
ENSG00000134698	EIF2C4	eukaryotic translation initiation factor 2C, 4 [Source:HGNC Symbol;Acc:18424]	-1.31127	5.50512	205.384	1.39659e-46	1.72351e-44
ENSG00000143578	CREB3L4	cAMP responsive element binding protein 3-like 4 [Source:HGNC Symbol;Acc:18854]	-1.12179	6.00889	205.172	1.55369e-46	1.90153e-44
ENSG00000140600	SH3GL3	SH3-domain GRB2-like 3 [Source:HGNC Symbol;Acc:10832]	-1.83213	3.77806	202.384	6.30479e-46	7.65308e-44
ENSG00000183762	KREMEN1	kringle containing transmembrane protein 1 [Source:HGNC Symbol;Acc:17550]	-0.881963	7.88488	202.342	6.43917e-46	7.75266e-44
ENSG00000184305	FAM190A	family with sequence similarity 190, member A [Source:HGNC Symbol;Acc:29349]	2.96234	2.42399	200.286	1.80863e-45	2.16e-43
ENSG00000076513	ANKRD13A	ankyrin repeat domain 13A [Source:HGNC Symbol;Acc:21268]	-1.21852	5.75784	198.847	3.72685e-45	4.41528e-43
ENSG00000170017	ALCAM	activated leukocyte cell adhesion molecule [Source:HGNC Symbol;Acc:400]	-1.24245	5.91641	197.317	8.03992e-45	9.44946e-43
ENSG00000158270	COLEC12	collectin sub-family member 12 [Source:HGNC Symbol;Acc:16016]	2.07379	3.44951	195.754	1.76378e-44	2.05668e-42
ENSG00000153823	PID1	phosphotyrosine interaction domain containing 1 [Source:HGNC Symbol;Acc:26084]	2.25982	3.00445	190.213	2.85681e-43	3.30519e-41
ENSG00000119801	YPEL5	yippee-like 5 (Drosophila) [Source:HGNC Symbol;Acc:18329]	-1.64163	4.60799	189.891	3.3591e-43	3.85619e-41
ENSG00000139793	MBNL2	muscleblind-like splicing regulator 2 [Source:HGNC Symbol;Acc:16746]	-1.85313	4.05145	189.87	3.39415e-43	3.86646e-41
ENSG00000136267	DGKB	diacylglycerol kinase, beta 90kDa [Source:HGNC Symbol;Acc:2850]	1.92678	3.59141	189.64	3.80942e-43	4.30639e-41
ENSG00000138764	CCNG2	cyclin G2 [Source:HGNC Symbol;Acc:1593]	-1.25844	5.56431	186.734	1.64195e-42	1.84209e-40
ENSG00000107984	DKK1	dickkopf 1 homolog (Xenopus laevis) [Source:HGNC Symbol;Acc:2891]	-2.20903	3.89138	186.564	1.78835e-42	1.99125e-40
ENSG00000155367	PPM1J	protein phosphatase, Mg2+/Mn2+ dependent, 1J [Source:HGNC Symbol;Acc:20785]	-4.62459	1.12728	185.363	3.27038e-42	3.61425e-40
ENSG00000092621	PHGDH	phosphoglycerate dehydrogenase [Source:HGNC Symbol;Acc:8923]	1.09184	7.63782	183.933	6.70914e-42	7.35968e-40
ENSG00000146425	DYNLT1	dynein, light chain, Tctex-type 1 [Source:HGNC Symbol;Acc:11697]	-0.855221	7.9554	183.406	8.74452e-42	9.52188e-40
ENSG00000226950	DANCR	differentiation antagonizing non-protein coding RNA [Source:HGNC Symbol;Acc:28964]	0.915657	7.21746	183.043	1.04986e-41	1.13485e-39
ENSG00000147251	DOCK11	dedicator of cytokinesis 11 [Source:HGNC Symbol;Acc:23483]	1.50405	4.6258	181.562	2.21e-41	2.37159e-39
ENSG00000114166	KAT2B	K(lysine) acetyltransferase 2B [Source:HGNC Symbol;Acc:8638]	-2.07129	3.8645	180.396	3.97054e-41	4.23019e-39
ENSG00000196159	FAT4	FAT tumor suppressor homolog 4 (Drosophila) [Source:HGNC Symbol;Acc:23109]	1.51753	4.47318	180.001	4.84486e-41	5.12482e-39
ENSG00000156508	EEF1A1	eukaryotic translation elongation factor 1 alpha 1 [Source:HGNC Symbol;Acc:3189]	0.586888	12.3332	179.663	5.74e-41	6.02863e-39
ENSG00000183023	SLC8A1	solute carrier family 8 (sodium/calcium exchanger), member 1 [Source:HGNC Symbol;Acc:11068]	2.33734	3.06711	179.322	6.8145e-41	7.10676e-39
ENSG00000189056	RELN	reelin [Source:HGNC Symbol;Acc:9957]	0.856269	7.12588	178.904	8.40771e-41	8.70698e-39
ENSG00000162631	NTNG1	netrin G1 [Source:HGNC Symbol;Acc:23319]	-2.16207	3.05496	178.886	8.48522e-41	8.72623e-39
ENSG00000100234	TIMP3	TIMP metallopeptidase inhibitor 3 [Source:HGNC Symbol;Acc:11822]	1.45267	4.63164	178.544	1.00771e-40	1.02918e-38
ENSG00000145632	PLK2	polo-like kinase 2 [Source:HGNC Symbol;Acc:19699]	1.06809	6.31986	178.14	1.23442e-40	1.25209e-38
ENSG00000136156	ITM2B	integral membrane protein 2B [Source:HGNC Symbol;Acc:6174]	-0.845087	7.69323	177.61	1.61127e-40	1.62322e-38
ENSG00000181274	FRAT2	frequently rearranged in advanced T-cell lymphomas 2 [Source:HGNC Symbol;Acc:16048]	-2.1486	2.94475	177.572	1.64275e-40	1.64375e-38
ENSG00000075213	SEMA3A	sema domain, immunoglobulin domain (Ig), short basic domain, secreted, (semaphorin) 3A [Source:HGNC Symbol;Acc:10723]	2.46423	2.9442	176.638	2.62777e-40	2.61172e-38
ENSG00000095015	MAP3K1	mitogen-activated protein kinase kinase kinase 1, E3 ubiquitin protein ligase [Source:HGNC Symbol;Acc:6848]	-1.11756	5.73817	176.534	2.76854e-40	2.73329e-38
ENSG00000198400	NTRK1	neurotrophic tyrosine kinase, receptor, type 1 [Source:HGNC Symbol;Acc:8031]	-1.54589	5.42948	176.48	2.84405e-40	2.78924e-38
ENSG00000166164	BRD7	bromodomain containing 7 [Source:HGNC Symbol;Acc:14310]	0.899156	6.80201	175.008	5.96262e-40	5.80923e-38
ENSG00000177519	RPRM	reprimo, TP53 dependent G2 arrest mediator candidate [Source:HGNC Symbol;Acc:24201]	3.02784	2.62926	174.595	7.33978e-40	7.10423e-38
ENSG00000144824	PHLDB2	pleckstrin homology-like domain, family B, member 2 [Source:HGNC Symbol;Acc:29573]	0.85048	7.2908	173.5	1.27297e-39	1.22411e-37
ENSG00000104081	BMF	Bcl2 modifying factor [Source:HGNC Symbol;Acc:24132]	-2.19362	3.15557	172.518	2.08608e-39	1.99308e-37
ENSG00000067141	NEO1	neogenin 1 [Source:HGNC Symbol;Acc:7754]	-0.798187	7.54986	171.947	2.77883e-39	2.63792e-37
ENSG00000104332	SFRP1	secreted frizzled-related protein 1 [Source:HGNC Symbol;Acc:10776]	-0.990598	6.11	171.778	3.02535e-39	2.85366e-37
ENSG00000149131	SERPING1	serpin peptidase inhibitor, clade G (C1 inhibitor), member 1 [Source:HGNC Symbol;Acc:1228]	-1.72993	4.00783	171.391	3.67608e-39	3.44551e-37
ENSG00000141449	GREB1L	growth regulation by estrogen in breast cancer-like [Source:HGNC Symbol;Acc:31042]	-0.899902	6.60581	171.19	4.06752e-39	3.78842e-37
ENSG00000139211	AMIGO2	adhesion molecule with Ig-like domain 2 [Source:HGNC Symbol;Acc:24073]	-3.16962	1.8577	170.763	5.04173e-39	4.66643e-37
ENSG00000169855	ROBO1	roundabout, axon guidance receptor, homolog 1 (Drosophila) [Source:HGNC Symbol;Acc:10249]	-0.847696	6.83483	170.325	6.28224e-39	5.77849e-37
ENSG00000083067	TRPM3	transient receptor potential cation channel, subfamily M, member 3 [Source:HGNC Symbol;Acc:17992]	3.18255	1.66463	168.874	1.30365e-38	1.19171e-36
ENSG00000185070	FLRT2	fibronectin leucine rich transmembrane protein 2 [Source:HGNC Symbol;Acc:3761]	1.31387	5.02023	166.915	3.4905e-38	3.17122e-36
ENSG00000100678	SLC8A3	solute carrier family 8 (sodium/calcium exchanger), member 3 [Source:HGNC Symbol;Acc:11070]	3.62006	1.61119	166.716	3.85913e-38	3.48475e-36
ENSG00000196141	SPATS2L	spermatogenesis associated, serine-rich 2-like [Source:HGNC Symbol;Acc:24574]	-1.44532	4.60289	165.797	6.1262e-38	5.49836e-36
ENSG00000115355	CCDC88A	coiled-coil domain containing 88A [Source:HGNC Symbol;Acc:25523]	-0.792204	8.94813	165.776	6.19251e-38	5.52439e-36
ENSG00000163618	CADPS	Ca++-dependent secretion activator [Source:HGNC Symbol;Acc:1426]	1.57514	4.13886	164.607	1.1149e-37	9.88657e-36
ENSG00000077279	DCX	doublecortin [Source:HGNC Symbol;Acc:2714]	-1.04414	5.90406	164.396	1.23923e-37	1.09236e-35
ENSG00000196376	SLC35F1	solute carrier family 35, member F1 [Source:HGNC Symbol;Acc:21483]	-1.32196	4.82638	164.188	1.37623e-37	1.20595e-35
ENSG00000088756	ARHGAP28	Rho GTPase activating protein 28 [Source:HGNC Symbol;Acc:25509]	-1.54476	4.20178	163.809	1.66541e-37	1.45077e-35
ENSG00000105856	HBP1	HMG-box transcription factor 1 [Source:HGNC Symbol;Acc:23200]	-1.33924	4.90356	162.714	2.88874e-37	2.50172e-35
ENSG00000035862	TIMP2	TIMP metallopeptidase inhibitor 2 [Source:HGNC Symbol;Acc:11821]	-0.730168	8.38711	162.012	4.112e-37	3.54039e-35
ENSG00000245870	RP11-457P14.4		-1.2789	4.92623	161.707	4.79478e-37	4.10439e-35
ENSG00000162641	AKNAD1	AKNA domain containing 1 [Source:HGNC Symbol;Acc:28398]	-0.797816	7.15403	159.901	1.18925e-36	1.01216e-34
ENSG00000120693	SMAD9	SMAD family member 9 [Source:HGNC Symbol;Acc:6774]	-0.811101	6.83476	159.07	1.80624e-36	1.5285e-34
ENSG00000141576	RNF157	ring finger protein 157 [Source:HGNC Symbol;Acc:29402]	-0.892998	6.67498	158.786	2.08439e-36	1.75385e-34
ENSG00000182199	SHMT2	serine hydroxymethyltransferase 2 (mitochondrial) [Source:HGNC Symbol;Acc:10852]	1.01114	7.16893	158.3	2.66105e-36	2.22641e-34
ENSG00000152492	CCDC50	coiled-coil domain containing 50 [Source:HGNC Symbol;Acc:18111]	-0.892382	7.0114	157.201	4.62714e-36	3.84962e-34
ENSG00000114019	AMOTL2	angiomotin like 2 [Source:HGNC Symbol;Acc:17812]	-1.39381	4.76854	157.084	4.90613e-36	4.05893e-34
ENSG00000144218	AFF3	AF4/FMR2 family, member 3 [Source:HGNC Symbol;Acc:6473]	-1.24507	5.00581	156.466	6.69534e-36	5.50841e-34
ENSG00000112531	QKI	QKI, KH domain containing, RNA binding [Source:HGNC Symbol;Acc:21100]	-0.712376	8.60983	155.631	1.01908e-35	8.33788e-34
ENSG00000107731	UNC5B	unc-5 homolog B (C. elegans) [Source:HGNC Symbol;Acc:12568]	-0.967425	7.81293	154.567	1.74102e-35	1.41664e-33
ENSG00000151725	MLF1IP	MLF1 interacting protein [Source:HGNC Symbol;Acc:21348]	-0.858306	6.9023	152.831	4.17066e-35	3.36283e-33
ENSG00000165655	ZNF503	zinc finger protein 503 [Source:HGNC Symbol;Acc:23589]	1.49548	4.30509	152.827	4.17827e-35	3.36283e-33
ENSG00000260214	GS1-465N13.1		1.79819	4.06869	152.795	4.24731e-35	3.39992e-33
ENSG00000005810	MYCBP2	MYC binding protein 2, E3 ubiquitin protein ligase [Source:HGNC Symbol;Acc:23386]	-0.675046	8.41431	152.675	4.51116e-35	3.59171e-33
ENSG00000189184	PCDH18	protocadherin 18 [Source:HGNC Symbol;Acc:14268]	1.28879	4.89867	152.099	6.02806e-35	4.77378e-33
ENSG00000242125	SNHG3	small nucleolar RNA host gene 3 (non-protein coding) [Source:HGNC Symbol;Acc:10118]	0.7584	7.36908	151.681	7.43794e-35	5.85896e-33
ENSG00000139318	DUSP6	dual specificity phosphatase 6 [Source:HGNC Symbol;Acc:3072]	-2.68485	2.40896	151.517	8.07877e-35	6.33008e-33
ENSG00000141376	BCAS3	breast carcinoma amplified sequence 3 [Source:HGNC Symbol;Acc:14347]	-1.6397	3.69036	150.932	1.0847e-34	8.45435e-33
ENSG00000070756	PABPC1	poly(A) binding protein, cytoplasmic 1 [Source:HGNC Symbol;Acc:8554]	0.615671	9.91455	150.493	1.35239e-34	1.04856e-32
ENSG00000134294	SLC38A2	solute carrier family 38, member 2 [Source:HGNC Symbol;Acc:13448]	-0.716998	8.72212	149.698	2.01773e-34	1.55628e-32
ENSG00000148516	ZEB1	zinc finger E-box binding homeobox 1 [Source:HGNC Symbol;Acc:11642]	-0.722015	7.65866	148.829	3.12473e-34	2.39762e-32
ENSG00000090530	LEPREL1	leprecan-like 1 [Source:HGNC Symbol;Acc:19317]	2.69242	2.34461	148.646	3.42701e-34	2.61601e-32
ENSG00000146278	PNRC1	proline-rich nuclear receptor coactivator 1 [Source:HGNC Symbol;Acc:17278]	-1.26469	4.95489	148.459	3.76596e-34	2.86001e-32
ENSG00000203880	PCMTD2	protein-L-isoaspartate (D-aspartate) O-methyltransferase domain containing 2 [Source:HGNC Symbol;Acc:15882]	-0.897122	6.62605	148.167	4.36201e-34	3.29209e-32
ENSG00000140443	IGF1R	insulin-like growth factor 1 receptor [Source:HGNC Symbol;Acc:5465]	-0.789102	7.10839	148.159	4.37938e-34	3.29209e-32
ENSG00000027644	INSRR	insulin receptor-related receptor [Source:HGNC Symbol;Acc:6093]	-1.90745	3.2083	147.586	5.84352e-34	4.37054e-32
ENSG00000113558	SKP1	S-phase kinase-associated protein 1 [Source:HGNC Symbol;Acc:10899]	-0.712776	8.47761	147.114	7.40913e-34	5.51366e-32
ENSG00000023909	GCLM	glutamate-cysteine ligase, modifier subunit [Source:HGNC Symbol;Acc:4312]	-1.01231	6.16712	146.523	9.97678e-34	7.38731e-32
ENSG00000144847	IGSF11	immunoglobulin superfamily, member 11 [Source:HGNC Symbol;Acc:16669]	-0.887844	6.4103	143.76	4.00969e-33	2.95421e-31
ENSG00000185112	FAM43A	family with sequence similarity 43, member A [Source:HGNC Symbol;Acc:26888]	-1.22901	5.19719	143.424	4.74868e-33	3.48135e-31
ENSG00000142541	RPL13A	ribosomal protein L13a [Source:HGNC Symbol;Acc:10304]	0.725702	9.92503	142.841	6.36862e-33	4.64596e-31
ENSG00000115902	SLC1A4	solute carrier family 1 (glutamate/neutral amino acid transporter), member 4 [Source:HGNC Symbol;Acc:10942]	1.33655	4.56403	142.344	8.17869e-33	5.93717e-31
ENSG00000116990	MYCL1	v-myc myelocytomatosis viral oncogene homolog 1, lung carcinoma derived (avian) [Source:HGNC Symbol;Acc:7555]	-1.86024	3.1357	142.105	9.22274e-33	6.66241e-31
ENSG00000143013	LMO4	LIM domain only 4 [Source:HGNC Symbol;Acc:6644]	-0.744128	7.51426	141.463	1.27424e-32	9.16029e-31
ENSG00000206538	VGLL3	vestigial like 3 (Drosophila) [Source:HGNC Symbol;Acc:24327]	-1.60996	3.53897	140.825	1.75696e-32	1.25695e-30
ENSG00000181072	CHRM2	cholinergic receptor, muscarinic 2 [Source:HGNC Symbol;Acc:1951]	-1.08527	5.21509	140.755	1.82004e-32	1.29581e-30
ENSG00000130558	OLFM1	olfactomedin 1 [Source:HGNC Symbol;Acc:17187]	-0.682361	8.1303	140.694	1.87684e-32	1.32987e-30
ENSG00000163673	DCLK3	doublecortin-like kinase 3 [Source:HGNC Symbol;Acc:19005]	-1.81215	3.14212	140.68	1.89037e-32	1.33307e-30
ENSG00000052850	ALX4	ALX homeobox 4 [Source:HGNC Symbol;Acc:450]	-1.75033	3.50159	140.466	2.10491e-32	1.47733e-30
ENSG00000154736	ADAMTS5	ADAM metallopeptidase with thrombospondin type 1 motif, 5 [Source:HGNC Symbol;Acc:221]	-1.02636	5.54361	139.551	3.33719e-32	2.33115e-30
ENSG00000197702	PARVA	parvin, alpha [Source:HGNC Symbol;Acc:14652]	-1.29852	4.45972	138.815	4.83436e-32	3.36113e-30
ENSG00000134323	MYCN	v-myc myelocytomatosis viral related oncogene, neuroblastoma derived (avian) [Source:HGNC Symbol;Acc:7559]	-0.61911	9.51699	138.541	5.54872e-32	3.83976e-30
ENSG00000108306	FBXL20	F-box and leucine-rich repeat protein 20 [Source:HGNC Symbol;Acc:24679]	-1.39125	4.21602	138.387	5.99753e-32	4.13104e-30
ENSG00000089157	RPLP0	ribosomal protein, large, P0 [Source:HGNC Symbol;Acc:10371]	0.619777	10.5901	137.021	1.19345e-31	8.1823e-30
ENSG00000213047	DENND1B	DENN/MADD domain containing 1B [Source:HGNC Symbol;Acc:28404]	1.56577	3.81907	136.916	1.2577e-31	8.56719e-30
ENSG00000047346	FAM214A	family with sequence similarity 214, member A [Source:HGNC Symbol;Acc:25609]	-1.4003	4.59733	136.911	1.26116e-31	8.56719e-30
ENSG00000211448	DIO2	deiodinase, iodothyronine, type II [Source:HGNC Symbol;Acc:2884]	-3.51138	0.85341	136.866	1.28995e-31	8.72275e-30
ENSG00000039560	RAI14	retinoic acid induced 14 [Source:HGNC Symbol;Acc:14873]	-0.657529	8.30634	136.178	1.82466e-31	1.22824e-29
ENSG00000204335	SP5	Sp5 transcription factor [Source:HGNC Symbol;Acc:14529]	6.01144	0.441359	135.906	2.09242e-31	1.40211e-29
ENSG00000112290	WASF1	WAS protein family, member 1 [Source:HGNC Symbol;Acc:12732]	-0.675962	8.21118	135.885	2.11399e-31	1.41019e-29
ENSG00000130449	ZSWIM6	zinc finger, SWIM-type containing 6 [Source:HGNC Symbol;Acc:29316]	-0.97355	6.16168	135.859	2.14206e-31	1.4225e-29
ENSG00000109971	HSPA8	heat shock 70kDa protein 8 [Source:HGNC Symbol;Acc:5241]	0.658729	11.2853	135.02	3.26858e-31	2.16091e-29
ENSG00000104635	SLC39A14	solute carrier family 39 (zinc transporter), member 14 [Source:HGNC Symbol;Acc:20858]	0.714583	7.48148	134.66	3.91808e-31	2.57107e-29
ENSG00000173812	EIF1	eukaryotic translation initiation factor 1 [Source:HGNC Symbol;Acc:3249]	0.629516	8.88552	134.657	3.9237e-31	2.57107e-29
ENSG00000244694	PTCHD4	patched domain containing 4 [Source:HGNC Symbol;Acc:21345]	1.80762	3.2276	134.345	4.59209e-31	2.99578e-29
ENSG00000165194	PCDH19	protocadherin 19 [Source:HGNC Symbol;Acc:14270]	-1.33333	4.46958	134.252	4.81193e-31	3.12543e-29
ENSG00000120727	PAIP2	poly(A) binding protein interacting protein 2 [Source:HGNC Symbol;Acc:17970]	-0.842714	6.62905	134.017	5.41796e-31	3.5037e-29
ENSG00000145431	PDGFC	platelet derived growth factor C [Source:HGNC Symbol;Acc:8801]	1.33093	4.5489	133.726	6.27076e-31	4.03755e-29
ENSG00000144228	SPOPL	speckle-type POZ protein-like [Source:HGNC Symbol;Acc:27934]	-1.00705	5.5277	133.548	6.86154e-31	4.39881e-29
ENSG00000180801	ARSJ	arylsulfatase family, member J [Source:HGNC Symbol;Acc:26286]	1.48941	4.07563	133.479	7.10302e-31	4.53399e-29
ENSG00000154265	ABCA5	ATP-binding cassette, sub-family A (ABC1), member 5 [Source:HGNC Symbol;Acc:35]	-0.768076	7.52736	132.543	1.13812e-30	7.23367e-29
ENSG00000135241	PNPLA8	patatin-like phospholipase domain containing 8 [Source:HGNC Symbol;Acc:28900]	-1.26029	4.68117	132.068	1.44603e-30	9.1514e-29
ENSG00000154310	TNIK	TRAF2 and NCK interacting kinase [Source:HGNC Symbol;Acc:30765]	-1.14518	4.87553	131.724	1.71927e-30	1.08344e-28
ENSG00000053254	FOXN3	forkhead box N3 [Source:HGNC Symbol;Acc:1928]	-0.677421	7.75388	131.228	2.20715e-30	1.38499e-28
ENSG00000124177	CHD6	chromodomain helicase DNA binding protein 6 [Source:HGNC Symbol;Acc:19057]	-0.805333	6.66339	130.748	2.81192e-30	1.75703e-28
ENSG00000157954	WIPI2	WD repeat domain, phosphoinositide interacting 2 [Source:HGNC Symbol;Acc:32225]	-0.932747	5.82514	130.237	3.63682e-30	2.26293e-28
ENSG00000164117	FBXO8	F-box protein 8 [Source:HGNC Symbol;Acc:13587]	-1.04605	5.3022	130.127	3.84473e-30	2.38229e-28
ENSG00000050405	LIMA1	LIM domain and actin binding 1 [Source:HGNC Symbol;Acc:24636]	0.739208	7.30486	130.106	3.88389e-30	2.39652e-28
ENSG00000033122	LRRC7	leucine rich repeat containing 7 [Source:HGNC Symbol;Acc:18531]	-2.95559	1.40583	129.588	5.04204e-30	3.09824e-28
ENSG00000205542	TMSB4X	thymosin beta 4, X-linked [Source:HGNC Symbol;Acc:11881]	-0.597416	8.94919	129.573	5.08235e-30	3.11011e-28
ENSG00000112406	HECA	headcase homolog (Drosophila) [Source:HGNC Symbol;Acc:21041]	-1.4364	3.99393	129.154	6.27466e-30	3.82393e-28
ENSG00000105270	CLIP3	CAP-GLY domain containing linker protein 3 [Source:HGNC Symbol;Acc:24314]	-1.43096	4.2554	129.029	6.68344e-30	4.05636e-28
ENSG00000049130	KITLG	KIT ligand [Source:HGNC Symbol;Acc:6343]	1.12257	5.36407	127.777	1.25585e-29	7.59099e-28
ENSG00000012822	CALCOCO1	calcium binding and coiled-coil domain 1 [Source:HGNC Symbol;Acc:29306]	-1.54192	4.02214	127.653	1.33666e-29	8.04659e-28
ENSG00000109132	PHOX2B	paired-like homeobox 2b [Source:HGNC Symbol;Acc:9143]	-0.638914	8.5707	127.278	1.6148e-29	9.68161e-28
ENSG00000133639	BTG1	B-cell translocation gene 1, anti-proliferative [Source:HGNC Symbol;Acc:1130]	-1.08246	5.33647	126.984	1.87261e-29	1.1182e-27
ENSG00000102409	BEX4	brain expressed, X-linked 4 [Source:HGNC Symbol;Acc:25475]	-0.900621	6.03099	126.804	2.05088e-29	1.21974e-27
ENSG00000111145	ELK3	ELK3, ETS-domain protein (SRF accessory protein 2) [Source:HGNC Symbol;Acc:3325]	-1.12767	5.32352	126.646	2.22094e-29	1.31559e-27
ENSG00000128965	CHAC1	ChaC, cation transport regulator homolog 1 (E. coli) [Source:HGNC Symbol;Acc:28680]	2.1909	3.00971	126.311	2.6287e-29	1.54928e-27
ENSG00000223749	AC004383.4		-1.88802	2.59763	126.305	2.63636e-29	1.54928e-27
ENSG00000016082	ISL1	ISL LIM homeobox 1 [Source:HGNC Symbol;Acc:6132]	-1.11431	5.19158	126.138	2.86849e-29	1.67903e-27
ENSG00000111885	MAN1A1	mannosidase, alpha, class 1A, member 1 [Source:HGNC Symbol;Acc:6821]	-0.789286	6.87406	126.104	2.91803e-29	1.7013e-27
ENSG00000163629	PTPN13	protein tyrosine phosphatase, non-receptor type 13 (APO-1/CD95 (Fas)-associated phosphatase) [Source:HGNC Symbol;Acc:9646]	0.625995	8.3018	125.655	3.65952e-29	2.12525e-27
ENSG00000171105	INSR	insulin receptor [Source:HGNC Symbol;Acc:6091]	-1.34754	4.06072	125.468	4.0203e-29	2.32565e-27
ENSG00000087086	FTL	ferritin, light polypeptide [Source:HGNC Symbol;Acc:3999]	-0.812679	8.677	125.265	4.45235e-29	2.56556e-27
ENSG00000113407	TARS	threonyl-tRNA synthetase [Source:HGNC Symbol;Acc:11572]	0.618522	8.46977	125.093	4.85645e-29	2.78756e-27
ENSG00000162981	FAM84A	family with sequence similarity 84, member A [Source:HGNC Symbol;Acc:20743]	-0.582378	9.65255	125.054	4.95243e-29	2.83168e-27
ENSG00000217236	SP9	Sp9 transcription factor homolog (mouse) [Source:HGNC Symbol;Acc:30690]	10.7557	-0.0726162	124.96	5.19192e-29	2.9572e-27
ENSG00000261762	RP11-650L12.2		-1.61488	3.89665	124.892	5.37374e-29	3.04903e-27
ENSG00000133019	CHRM3	cholinergic receptor, muscarinic 3 [Source:HGNC Symbol;Acc:1952]	3.15229	1.52777	124.878	5.41273e-29	3.05943e-27
ENSG00000023287	RB1CC1	RB1-inducible coiled-coil 1 [Source:HGNC Symbol;Acc:15574]	-0.835203	6.7612	122.316	1.96852e-28	1.10843e-26
ENSG00000120149	MSX2	msh homeobox 2 [Source:HGNC Symbol;Acc:7392]	2.22493	3.10906	121.9	2.42717e-28	1.36152e-26
ENSG00000182601	HS3ST4	heparan sulfate (glucosamine) 3-O-sulfotransferase 4 [Source:HGNC Symbol;Acc:5200]	-1.77715	3.44608	121.217	3.42607e-28	1.91459e-26
ENSG00000234456	MAGI2-AS3	MAGI2 antisense RNA 3 [Source:HGNC Symbol;Acc:40862]	-0.839821	7.07971	121.05	3.72569e-28	2.0742e-26
ENSG00000146469	VIP	vasoactive intestinal peptide [Source:HGNC Symbol;Acc:12693]	-4.89793	0.747207	120.585	4.70953e-28	2.61211e-26
ENSG00000106688	SLC1A1	solute carrier family 1 (neuronal/epithelial high affinity glutamate transporter, system Xag), member 1 [Source:HGNC Symbol;Acc:10939]	1.6823	2.91881	119.19	9.51762e-28	5.2592e-26
ENSG00000117525	F3	coagulation factor III (thromboplastin, tissue factor) [Source:HGNC Symbol;Acc:3541]	-1.3229	4.61959	119.09	1.00093e-27	5.51034e-26
ENSG00000240831	-	A)	-0.908774	7.18119	118.394	1.42137e-27	7.79595e-26
ENSG00000159167	STC1	stanniocalcin 1 [Source:HGNC Symbol;Acc:11373]	-1.21333	4.42238	117.355	2.40063e-27	1.31184e-25
ENSG00000211459	J01415.24		-0.616387	8.78632	117.278	2.49508e-27	1.35844e-25
ENSG00000175215	CTDSP2	CTD (carboxy-terminal domain, RNA polymerase II, polypeptide A) small phosphatase 2 [Source:HGNC Symbol;Acc:17077]	-0.761042	6.89784	117.112	2.71344e-27	1.47192e-25
ENSG00000077264	PAK3	p21 protein (Cdc42/Rac)-activated kinase 3 [Source:HGNC Symbol;Acc:8592]	1.53707	3.71483	116.979	2.90063e-27	1.56772e-25
ENSG00000197958	RPL12	ribosomal protein L12 [Source:HGNC Symbol;Acc:10302]	0.620517	9.09712	116.876	3.05635e-27	1.64552e-25
ENSG00000165617	DACT1	dapper, antagonist of beta-catenin, homolog 1 (Xenopus laevis) [Source:HGNC Symbol;Acc:17748]	-1.04626	5.18532	116.869	3.06681e-27	1.64552e-25
ENSG00000140262	TCF12	transcription factor 12 [Source:HGNC Symbol;Acc:11623]	0.577784	9.59142	116.832	3.12491e-27	1.67064e-25
ENSG00000150594	ADRA2A	adrenoceptor alpha 2A [Source:HGNC Symbol;Acc:281]	-1.44331	3.65664	116.816	3.15033e-27	1.67818e-25
ENSG00000144681	STAC	SH3 and cysteine rich domain [Source:HGNC Symbol;Acc:11353]	-0.887687	5.70138	116.778	3.20993e-27	1.70379e-25
ENSG00000171604	CXXC5	CXXC finger protein 5 [Source:HGNC Symbol;Acc:26943]	-1.49175	3.40969	116.699	3.34165e-27	1.76738e-25
ENSG00000178031	ADAMTSL1	ADAMTS-like 1 [Source:HGNC Symbol;Acc:14632]	-2.50738	1.69361	116.645	3.43265e-27	1.80904e-25
ENSG00000173207	CKS1B	CDC28 protein kinase regulatory subunit 1B [Source:HGNC Symbol;Acc:19083]	-0.597172	8.46906	116.516	3.66394e-27	1.92409e-25
ENSG00000138430	OLA1	Obg-like ATPase 1 [Source:HGNC Symbol;Acc:28833]	0.737901	7.12281	115.701	5.52611e-27	2.89174e-25
ENSG00000108256	NUFIP2	nuclear fragile X mental retardation protein interacting protein 2 [Source:HGNC Symbol;Acc:17634]	0.630894	8.93869	115.67	5.61254e-27	2.92662e-25
ENSG00000138434	SSFA2	sperm specific antigen 2 [Source:HGNC Symbol;Acc:11319]	-0.604798	8.28102	115.485	6.16375e-27	3.20277e-25
ENSG00000079102	RUNX1T1	runt-related transcription factor 1; translocated to, 1 (cyclin D-related) [Source:HGNC Symbol;Acc:1535]	-0.975715	6.39365	115.426	6.3475e-27	3.28672e-25
ENSG00000105409	ATP1A3	ATPase, Na+/K+ transporting, alpha 3 polypeptide [Source:HGNC Symbol;Acc:801]	0.939571	7.14879	115.262	6.89538e-27	3.55797e-25
ENSG00000165895	ARHGAP42	Rho GTPase activating protein 42 [Source:HGNC Symbol;Acc:26545]	-0.847783	6.20726	115.06	7.63423e-27	3.92553e-25
ENSG00000129518	EAPP	E2F-associated phosphoprotein [Source:HGNC Symbol;Acc:19312]	-1.10585	4.78358	115.005	7.84946e-27	4.02224e-25
ENSG00000175643	RMI2	RMI2, RecQ mediated genome instability 2, homolog (S. cerevisiae) [Source:HGNC Symbol;Acc:28349]	-1.20555	4.35342	114.762	8.87295e-27	4.53102e-25
ENSG00000150540	HNMT	histamine N-methyltransferase [Source:HGNC Symbol;Acc:5028]	-1.51503	3.60372	114.755	8.9038e-27	4.53114e-25
ENSG00000139629	GALNT6	UDP-N-acetyl-alpha-D-galactosamine:polypeptide N-acetylgalactosaminyltransferase 6 (GalNAc-T6) [Source:HGNC Symbol;Acc:4128]	-1.39889	3.61799	114.706	9.1271e-27	4.62888e-25
ENSG00000178235	SLITRK1	SLIT and NTRK-like family, member 1 [Source:HGNC Symbol;Acc:20297]	1.91415	3.09013	114.541	9.92148e-27	5.01458e-25
ENSG00000125266	EFNB2	ephrin-B2 [Source:HGNC Symbol;Acc:3227]	1.51618	4.12768	114.416	1.05672e-26	5.32276e-25
ENSG00000144834	TAGLN3	transgelin 3 [Source:HGNC Symbol;Acc:29868]	0.902494	5.91061	114.407	1.06154e-26	5.32892e-25
ENSG00000141542	RAB40B	RAB40B, member RAS oncogene family [Source:HGNC Symbol;Acc:18284]	-1.54446	3.47743	114.222	1.16524e-26	5.82975e-25
ENSG00000134369	NAV1	neuron navigator 1 [Source:HGNC Symbol;Acc:15989]	-0.949777	5.73201	114.171	1.1956e-26	5.96151e-25
ENSG00000112183	RBM24	RNA binding motif protein 24 [Source:HGNC Symbol;Acc:21539]	-0.737777	6.59406	113.899	1.37138e-26	6.81502e-25
ENSG00000104722	NEFM	neurofilament, medium polypeptide [Source:HGNC Symbol;Acc:7734]	0.802246	6.4929	113.552	1.63367e-26	8.09133e-25
ENSG00000160691	SHC1	SHC (Src homology 2 domain containing) transforming protein 1 [Source:HGNC Symbol;Acc:10840]	-0.723264	8.00715	113.191	1.95933e-26	9.67189e-25
ENSG00000104725	NEFL	neurofilament, light polypeptide [Source:HGNC Symbol;Acc:7739]	0.788325	6.22078	112.999	2.15917e-26	1.0623e-24
ENSG00000115461	IGFBP5	insulin-like growth factor binding protein 5 [Source:HGNC Symbol;Acc:5474]	0.665464	7.23625	112.23	3.181e-26	1.55985e-24
ENSG00000083290	ULK2	unc-51-like kinase 2 (C. elegans) [Source:HGNC Symbol;Acc:13480]	-0.997453	5.25237	112.136	3.33681e-26	1.63085e-24
ENSG00000165516	KLHDC2	kelch domain containing 2 [Source:HGNC Symbol;Acc:20231]	-0.904173	5.799	112.082	3.42776e-26	1.66979e-24
ENSG00000154856	APCDD1	adenomatosis polyposis coli down-regulated 1 [Source:HGNC Symbol;Acc:15718]	1.6113	3.24543	111.355	4.94605e-26	2.40151e-24
ENSG00000006007	GDE1	glycerophosphodiester phosphodiesterase 1 [Source:HGNC Symbol;Acc:29644]	0.769187	6.28573	110.828	6.45348e-26	3.12319e-24
ENSG00000237732	AC010980.2		1.85091	3.16453	110.631	7.12884e-26	3.4388e-24
ENSG00000079215	SLC1A3	solute carrier family 1 (glial high affinity glutamate transporter), member 3 [Source:HGNC Symbol;Acc:10941]	1.37985	3.9063	110.33	8.29599e-26	3.98881e-24
ENSG00000198121	LPAR1	lysophosphatidic acid receptor 1 [Source:HGNC Symbol;Acc:3166]	-1.07876	4.73609	110.031	9.64919e-26	4.62443e-24
ENSG00000140332	TLE3	transducin-like enhancer of split 3 (E(sp1) homolog, Drosophila) [Source:HGNC Symbol;Acc:11839]	-0.917547	6.19773	109.834	1.06566e-25	5.09078e-24
ENSG00000164327	RICTOR	RPTOR independent companion of MTOR, complex 2 [Source:HGNC Symbol;Acc:28611]	-0.884969	5.97574	109.651	1.16828e-25	5.56304e-24
ENSG00000075826	SEC31B	SEC31 homolog B (S. cerevisiae) [Source:HGNC Symbol;Acc:23197]	1.39895	3.76489	109.421	1.31252e-25	6.22984e-24
ENSG00000166224	SGPL1	sphingosine-1-phosphate lyase 1 [Source:HGNC Symbol;Acc:10817]	-0.70215	6.73136	108.97	1.64771e-25	7.79582e-24
ENSG00000183726	TMEM50A	transmembrane protein 50A [Source:HGNC Symbol;Acc:30590]	-0.759707	6.35623	108.283	2.32989e-25	1.09883e-23
ENSG00000152495	CAMK4	calcium/calmodulin-dependent protein kinase IV [Source:HGNC Symbol;Acc:1464]	-0.74068	6.52149	108.05	2.62097e-25	1.23219e-23
ENSG00000125968	ID1	inhibitor of DNA binding 1, dominant negative helix-loop-helix protein [Source:HGNC Symbol;Acc:5360]	-0.933244	6.37985	107.996	2.69364e-25	1.26234e-23
ENSG00000064225	ST3GAL6	ST3 beta-galactoside alpha-2,3-sialyltransferase 6 [Source:HGNC Symbol;Acc:18080]	-1.17153	4.43977	107.783	2.999e-25	1.40102e-23
ENSG00000101384	JAG1	jagged 1 [Source:HGNC Symbol;Acc:6188]	2.82179	2.04224	107.732	3.07625e-25	1.43259e-23
ENSG00000164609	SLU7	SLU7 splicing factor homolog (S. cerevisiae) [Source:HGNC Symbol;Acc:16939]	-0.772379	6.2656	107.261	3.9031e-25	1.81194e-23
ENSG00000054793	ATP9A	ATPase, class II, type 9A [Source:HGNC Symbol;Acc:13540]	-0.948164	5.55413	106.995	4.46355e-25	2.06565e-23
ENSG00000070961	ATP2B1	ATPase, Ca++ transporting, plasma membrane 1 [Source:HGNC Symbol;Acc:814]	0.745856	6.71286	106.841	4.82349e-25	2.22527e-23
ENSG00000137193	PIM1	pim-1 oncogene [Source:HGNC Symbol;Acc:8986]	-2.17652	2.09526	106.174	6.75396e-25	3.10619e-23
ENSG00000155130	MARCKS	myristoylated alanine-rich protein kinase C substrate [Source:HGNC Symbol;Acc:6759]	-0.611414	8.61257	105.908	7.72402e-25	3.54133e-23
ENSG00000111640	GAPDH	glyceraldehyde-3-phosphate dehydrogenase [Source:HGNC Symbol;Acc:4141]	0.592732	11.4011	105.88	7.83205e-25	3.57978e-23
ENSG00000112144	ICK	intestinal cell (MAK-like) kinase [Source:HGNC Symbol;Acc:21219]	-0.924972	5.67796	105.804	8.13989e-25	3.70904e-23
ENSG00000041515	MYO16	myosin XVI [Source:HGNC Symbol;Acc:29822]	-2.34571	1.65768	105.537	9.31628e-25	4.23205e-23
ENSG00000063015	SEZ6	seizure related 6 homolog (mouse) [Source:HGNC Symbol;Acc:15955]	1.73265	3.15112	105.462	9.67556e-25	4.38182e-23
ENSG00000198431	TXNRD1	thioredoxin reductase 1 [Source:HGNC Symbol;Acc:12437]	-0.547406	8.97902	105.029	1.20387e-24	5.43539e-23
ENSG00000167658	EEF2	eukaryotic translation elongation factor 2 [Source:HGNC Symbol;Acc:3214]	0.821727	10.3414	104.629	1.47261e-24	6.62853e-23
ENSG00000120251	GRIA2	glutamate receptor, ionotropic, AMPA 2 [Source:HGNC Symbol;Acc:4572]	1.7252	2.93824	104.588	1.50372e-24	6.74807e-23
ENSG00000101115	SALL4	sal-like 4 (Drosophila) [Source:HGNC Symbol;Acc:15924]	-1.39878	3.66584	104.392	1.65998e-24	7.42676e-23
ENSG00000203875	SNHG5	small nucleolar RNA host gene 5 (non-protein coding) [Source:HGNC Symbol;Acc:21026]	0.643575	7.25855	104.355	1.69111e-24	7.54325e-23
ENSG00000137154	RPS6	ribosomal protein S6 [Source:HGNC Symbol;Acc:10429]	0.491724	10.5203	104.177	1.85043e-24	8.22915e-23
ENSG00000151366	NDUFC2	NADH dehydrogenase (ubiquinone) 1, subcomplex unknown, 2, 14.5kDa [Source:HGNC Symbol;Acc:7706]	-0.834044	5.77531	104.109	1.91499e-24	8.49075e-23
ENSG00000137285	TUBB2B	tubulin, beta 2B class IIb [Source:HGNC Symbol;Acc:30829]	1.33029	4.16884	104.1	1.92393e-24	8.50494e-23
ENSG00000106415	GLCCI1	glucocorticoid induced transcript 1 [Source:HGNC Symbol;Acc:18713]	-0.863831	5.83109	104.091	1.93206e-24	8.51542e-23
ENSG00000146938	NLGN4X	neuroligin 4, X-linked [Source:HGNC Symbol;Acc:14287]	-0.895304	5.44594	103.691	2.36441e-24	1.03901e-22
ENSG00000175147	C1orf126	chromosome 1 open reading frame 126 [Source:HGNC Symbol;Acc:26301]	5.51681	-0.146109	103.381	2.76512e-24	1.2115e-22
ENSG00000116133	DHCR24	24-dehydrocholesterol reductase [Source:HGNC Symbol;Acc:2859]	0.638161	8.12687	103.165	3.08339e-24	1.34696e-22
ENSG00000137942	FNBP1L	formin binding protein 1-like [Source:HGNC Symbol;Acc:20851]	0.573067	8.44119	102.86	3.5975e-24	1.56692e-22
ENSG00000198794	SCAMP5	secretory carrier membrane protein 5 [Source:HGNC Symbol;Acc:30386]	0.716498	7.1578	102.635	4.02885e-24	1.74965e-22
ENSG00000163394	CCKAR	cholecystokinin A receptor [Source:HGNC Symbol;Acc:1570]	-1.8669	2.31504	102.543	4.2218e-24	1.82809e-22
ENSG00000091622	PITPNM3	PITPNM family member 3 [Source:HGNC Symbol;Acc:21043]	-3.01815	1.02396	102.487	4.34144e-24	1.87441e-22
ENSG00000064042	LIMCH1	LIM and calponin homology domains 1 [Source:HGNC Symbol;Acc:29191]	-0.860105	5.67577	101.958	5.67112e-24	2.44138e-22
ENSG00000011258	MBTD1	mbt domain containing 1 [Source:HGNC Symbol;Acc:19866]	-0.628796	7.74535	101.904	5.82727e-24	2.50133e-22
ENSG00000145425	RPS3A	ribosomal protein S3A [Source:HGNC Symbol;Acc:10421]	0.521029	10.4428	101.796	6.15575e-24	2.6347e-22
ENSG00000144366	GULP1	GULP, engulfment adaptor PTB domain containing 1 [Source:HGNC Symbol;Acc:18649]	-0.758679	6.5757	101.196	8.33284e-24	3.55622e-22
ENSG00000068078	FGFR3	fibroblast growth factor receptor 3 [Source:HGNC Symbol;Acc:3690]	-1.60645	2.97615	101.18	8.39791e-24	3.5737e-22
ENSG00000165879	FRAT1	frequently rearranged in advanced T-cell lymphomas [Source:HGNC Symbol;Acc:3944]	-4.80616	0.00125185	101.092	8.78149e-24	3.72622e-22
ENSG00000147862	NFIB	nuclear factor I/B [Source:HGNC Symbol;Acc:7785]	-0.619322	7.56117	100.845	9.94595e-24	4.20827e-22
ENSG00000100167	SEPT3	septin 3 [Source:HGNC Symbol;Acc:10750]	0.62831	7.4595	100.81	1.01264e-23	4.2724e-22
ENSG00000146007	ZMAT2	zinc finger, matrin-type 2 [Source:HGNC Symbol;Acc:26433]	-0.640367	7.02913	100.801	1.01705e-23	4.27883e-22
ENSG00000170647	TMEM133	transmembrane protein 133 [Source:HGNC Symbol;Acc:24033]	-1.06309	4.6112	100.709	1.0654e-23	4.46955e-22
ENSG00000135925	WNT10A	wingless-type MMTV integration site family, member 10A [Source:HGNC Symbol;Acc:13829]	4.92266	-0.181872	100.596	1.1282e-23	4.71963e-22
ENSG00000107485	GATA3	GATA binding protein 3 [Source:HGNC Symbol;Acc:4172]	-0.622481	7.69938	100.275	1.32631e-23	5.53276e-22
ENSG00000143061	IGSF3	immunoglobulin superfamily, member 3 [Source:HGNC Symbol;Acc:5950]	-0.590611	7.85254	99.4175	2.04504e-23	8.507e-22
ENSG00000128045	RASL11B	RAS-like, family 11, member B [Source:HGNC Symbol;Acc:23804]	0.863247	5.37906	98.5343	3.19449e-23	1.32513e-21
ENSG00000118733	OLFM3	olfactomedin 3 [Source:HGNC Symbol;Acc:17990]	2.74832	1.24522	98.3124	3.57315e-23	1.47807e-21
ENSG00000196358	NTNG2	netrin G2 [Source:HGNC Symbol;Acc:14288]	4.45385	0.23875	97.9376	4.31782e-23	1.78113e-21
ENSG00000138759	FRAS1	Fraser syndrome 1 [Source:HGNC Symbol;Acc:19185]	0.887706	5.73946	97.8949	4.41184e-23	1.81486e-21
ENSG00000115738	ID2	inhibitor of DNA binding 2, dominant negative helix-loop-helix protein [Source:HGNC Symbol;Acc:5361]	-0.661064	7.00751	97.3017	5.95284e-23	2.44198e-21
ENSG00000171310	CHST11	carbohydrate (chondroitin 4) sulfotransferase 11 [Source:HGNC Symbol;Acc:17422]	1.85756	2.5177	96.9517	7.10404e-23	2.90618e-21
ENSG00000164463	CREBRF	CREB3 regulatory factor [Source:HGNC Symbol;Acc:24050]	-1.67665	2.95965	96.7967	7.68225e-23	3.13406e-21
ENSG00000024862	CCDC28A	coiled-coil domain containing 28A [Source:HGNC Symbol;Acc:21098]	-1.31549	3.59915	96.6419	8.30713e-23	3.37968e-21
ENSG00000111653	ING4	inhibitor of growth family, member 4 [Source:HGNC Symbol;Acc:19423]	-1.22121	3.89013	96.564	8.64067e-23	3.50575e-21
ENSG00000148737	TCF7L2	transcription factor 7-like 2 (T-cell specific, HMG-box) [Source:HGNC Symbol;Acc:11641]	-1.11007	4.40564	96.2972	9.88687e-23	4.0004e-21
ENSG00000144868	TMEM108	transmembrane protein 108 [Source:HGNC Symbol;Acc:28451]	-1.37669	3.63799	96.1611	1.05907e-22	4.27225e-21
ENSG00000156587	UBE2L6	ubiquitin-conjugating enzyme E2L 6 [Source:HGNC Symbol;Acc:12490]	-1.2524	3.90169	96.1563	1.06164e-22	4.27225e-21
ENSG00000163041	H3F3A	H3 histone, family 3A [Source:HGNC Symbol;Acc:4764]	-0.570727	7.89059	96.0504	1.11996e-22	4.49473e-21
ENSG00000076003	MCM6	minichromosome maintenance complex component 6 [Source:HGNC Symbol;Acc:6949]	-0.701084	7.39135	95.9425	1.1827e-22	4.73368e-21
ENSG00000239843	-	A)	-0.879744	5.63857	95.8732	1.22482e-22	4.88906e-21
ENSG00000197093	GAL3ST4	galactose-3-O-sulfotransferase 4 [Source:HGNC Symbol;Acc:24145]	1.46617	3.72456	95.8469	1.2412e-22	4.94111e-21
ENSG00000113448	PDE4D	phosphodiesterase 4D, cAMP-specific [Source:HGNC Symbol;Acc:8783]	1.5473	3.40551	95.7544	1.30058e-22	5.16362e-21
ENSG00000108960	MMD	monocyte to macrophage differentiation-associated [Source:HGNC Symbol;Acc:7153]	-0.659419	7.64582	95.6759	1.35319e-22	5.35812e-21
ENSG00000100784	RPS6KA5	ribosomal protein S6 kinase, 90kDa, polypeptide 5 [Source:HGNC Symbol;Acc:10434]	-1.57277	2.8236	95.5401	1.44924e-22	5.72315e-21
ENSG00000139269	INHBE	inhibin, beta E [Source:HGNC Symbol;Acc:24029]	1.39734	3.88957	95.287	1.6469e-22	6.48641e-21
ENSG00000115129	TP53I3	tumor protein p53 inducible protein 3 [Source:HGNC Symbol;Acc:19373]	-1.15647	4.16398	95.0863	1.82261e-22	7.15942e-21
ENSG00000135111	TBX3	T-box 3 [Source:HGNC Symbol;Acc:11602]	-0.863944	5.41054	94.934	1.96841e-22	7.7117e-21
ENSG00000137177	KIF13A	kinesin family member 13A [Source:HGNC Symbol;Acc:14566]	-0.726282	6.20592	94.5858	2.34702e-22	9.1707e-21
ENSG00000149212	SESN3	sestrin 3 [Source:HGNC Symbol;Acc:23060]	0.733243	6.95917	94.2772	2.74285e-22	1.06892e-20
ENSG00000211445	GPX3	glutathione peroxidase 3 (plasma) [Source:HGNC Symbol;Acc:4555]	-1.7167	2.7733	94.1833	2.87622e-22	1.11795e-20
ENSG00000059728	MXD1	MAX dimerization protein 1 [Source:HGNC Symbol;Acc:6761]	-1.35761	3.51784	94.1485	2.92726e-22	1.13481e-20
ENSG00000175224	ATG13	autophagy related 13 [Source:HGNC Symbol;Acc:29091]	-0.892522	5.42833	94.0267	3.11304e-22	1.20368e-20
ENSG00000105464	GRIN2D	glutamate receptor, ionotropic, N-methyl D-aspartate 2D [Source:HGNC Symbol;Acc:4588]	-1.76657	2.6982	93.8348	3.42988e-22	1.32274e-20
ENSG00000187957	DNER	delta/notch-like EGF repeat containing [Source:HGNC Symbol;Acc:24456]	1.88242	2.02217	93.507	4.04765e-22	1.55692e-20
ENSG00000105968	H2AFV	H2A histone family, member V [Source:HGNC Symbol;Acc:20664]	-0.632558	7.50979	93.5008	4.06029e-22	1.55774e-20
ENSG00000228032	C14orf144	chromosome 14 open reading frame 144 [Source:HGNC Symbol;Acc:20358]	-1.76428	2.28286	93.4178	4.23415e-22	1.62025e-20
ENSG00000196586	MYO6	myosin VI [Source:HGNC Symbol;Acc:7605]	0.738614	6.14727	93.3108	4.46943e-22	1.70587e-20
ENSG00000162733	DDR2	discoidin domain receptor tyrosine kinase 2 [Source:HGNC Symbol;Acc:2731]	0.692957	7.56241	93.2163	4.68815e-22	1.78475e-20
ENSG00000183853	KIRREL	kin of IRRE like (Drosophila) [Source:HGNC Symbol;Acc:15734]	-0.562923	8.29943	92.805	5.77101e-22	2.19135e-20
ENSG00000106799	TGFBR1	transforming growth factor, beta receptor 1 [Source:HGNC Symbol;Acc:11772]	-0.61474	7.24552	92.696	6.09782e-22	2.30953e-20
ENSG00000173114	LRRN3	leucine rich repeat neuronal 3 [Source:HGNC Symbol;Acc:17200]	-1.57424	2.93785	92.4005	7.07964e-22	2.67455e-20
ENSG00000122884	P4HA1	prolyl 4-hydroxylase, alpha polypeptide I [Source:HGNC Symbol;Acc:8546]	0.842887	5.80338	92.2762	7.53868e-22	2.84072e-20
ENSG00000252229	-	A)	-0.662384	7.71617	92.2498	7.63983e-22	2.86748e-20
ENSG00000156395	SORCS3	sortilin-related VPS10 domain containing receptor 3 [Source:HGNC Symbol;Acc:16699]	4.2486	-0.115123	92.2476	7.64843e-22	2.86748e-20
ENSG00000198576	ARC	activity-regulated cytoskeleton-associated protein [Source:HGNC Symbol;Acc:648]	2.16331	3.08483	92.0981	8.24864e-22	3.0847e-20
ENSG00000164985	PSIP1	PC4 and SFRS1 interacting protein 1 [Source:HGNC Symbol;Acc:9527]	-0.592974	8.05716	92.084	8.30736e-22	3.09883e-20
ENSG00000111341	MGP	matrix Gla protein [Source:HGNC Symbol;Acc:7060]	-2.42753	1.33993	91.8273	9.45807e-22	3.51921e-20
ENSG00000259555	RP11-335K5.2		-2.72376	1.50578	91.5469	1.0898e-21	4.04083e-20
ENSG00000181541	MAB21L2	mab-21-like 2 (C. elegans) [Source:HGNC Symbol;Acc:6758]	0.866235	5.70903	91.5439	1.09145e-21	4.04083e-20
ENSG00000225783	MIAT	myocardial infarction associated transcript (non-protein coding) [Source:HGNC Symbol;Acc:33425]	-0.719809	6.87719	91.5342	1.09679e-21	4.05047e-20
ENSG00000066427	ATXN3	ataxin 3 [Source:HGNC Symbol;Acc:7106]	-1.0432	4.69286	91.4374	1.15176e-21	4.24289e-20
ENSG00000092820	EZR	ezrin [Source:HGNC Symbol;Acc:12691]	-0.555749	8.41436	91.3079	1.22968e-21	4.5187e-20
ENSG00000103257	SLC7A5	solute carrier family 7 (amino acid transporter light chain, L system), member 5 [Source:HGNC Symbol;Acc:11063]	1.05958	6.10065	90.8878	1.52056e-21	5.57375e-20
ENSG00000204711	C9orf135	chromosome 9 open reading frame 135 [Source:HGNC Symbol;Acc:31422]	-4.05528	0.0288698	90.8632	1.53954e-21	5.62939e-20
ENSG00000168003	SLC3A2	solute carrier family 3 (activators of dibasic and neutral amino acid transport), member 2 [Source:HGNC Symbol;Acc:11026]	0.777422	6.66759	90.4648	1.88295e-21	6.86813e-20
ENSG00000146648	EGFR	epidermal growth factor receptor [Source:HGNC Symbol;Acc:3236]	-1.37052	3.26699	90.2869	2.06009e-21	7.49578e-20
ENSG00000111144	LTA4H	leukotriene A4 hydrolase [Source:HGNC Symbol;Acc:6710]	0.618223	7.21309	90.2548	2.09387e-21	7.60001e-20
ENSG00000121749	TBC1D15	TBC1 domain family, member 15 [Source:HGNC Symbol;Acc:25694]	-0.809478	5.8824	89.8752	2.53666e-21	9.18469e-20
ENSG00000041982	TNC	tenascin C [Source:HGNC Symbol;Acc:5318]	1.37279	3.75408	89.5051	3.05847e-21	1.10471e-19
ENSG00000145864	GABRB2	gamma-aminobutyric acid (GABA) A receptor, beta 2 [Source:HGNC Symbol;Acc:4082]	1.46882	3.0635	89.2545	3.47144e-21	1.25082e-19
ENSG00000130164	LDLR	low density lipoprotein receptor [Source:HGNC Symbol;Acc:6547]	0.822382	6.06348	89.0697	3.81136e-21	1.36996e-19
ENSG00000154035	C17orf103	chromosome 17 open reading frame 103 [Source:HGNC Symbol;Acc:30770]	-2.47826	1.48368	89.0289	3.89079e-21	1.39461e-19
ENSG00000174444	RPL4	ribosomal protein L4 [Source:HGNC Symbol;Acc:10353]	0.447044	11.3051	89.0249	3.89878e-21	1.39461e-19
ENSG00000008513	ST3GAL1	ST3 beta-galactoside alpha-2,3-sialyltransferase 1 [Source:HGNC Symbol;Acc:10862]	0.962838	4.91047	88.9771	3.994e-21	1.42523e-19
ENSG00000162105	SHANK2	SH3 and multiple ankyrin repeat domains 2 [Source:HGNC Symbol;Acc:14295]	-1.1774	4.64883	88.9459	4.05754e-21	1.44443e-19
ENSG00000119820	YIPF4	Yip1 domain family, member 4 [Source:HGNC Symbol;Acc:28145]	-0.751802	6.19459	88.848	4.2635e-21	1.5141e-19
ENSG00000113196	HAND1	heart and neural crest derivatives expressed 1 [Source:HGNC Symbol;Acc:4807]	-0.801861	5.99698	88.6463	4.72113e-21	1.67261e-19
ENSG00000104419	NDRG1	N-myc downstream regulated 1 [Source:HGNC Symbol;Acc:7679]	-3.25032	1.03498	88.4825	5.12854e-21	1.81261e-19
ENSG00000148798	INA	internexin neuronal intermediate filament protein, alpha [Source:HGNC Symbol;Acc:6057]	0.528202	8.34087	88.2761	5.69276e-21	2.00724e-19
ENSG00000198815	FOXJ3	forkhead box J3 [Source:HGNC Symbol;Acc:29178]	-0.587846	7.311	87.47	8.55667e-21	3.00988e-19
ENSG00000243888	RP11-548B3.3		-1.69158	2.39669	87.3928	8.89738e-21	3.12231e-19
ENSG00000134333	LDHA	lactate dehydrogenase A [Source:HGNC Symbol;Acc:6535]	0.493286	10.2668	87.1572	1.00229e-20	3.50896e-19
ENSG00000182674	KCNB2	potassium voltage-gated channel, Shab-related subfamily, member 2 [Source:HGNC Symbol;Acc:6232]	-0.888928	5.15288	87.0829	1.04066e-20	3.6347e-19
ENSG00000163171	CDC42EP3	CDC42 effector protein (Rho GTPase binding) 3 [Source:HGNC Symbol;Acc:16943]	-0.717018	6.21958	86.9865	1.09267e-20	3.80736e-19
ENSG00000171791	BCL2	B-cell CLL/lymphoma 2 [Source:HGNC Symbol;Acc:990]	-0.822852	5.73185	86.7938	1.20449e-20	4.18717e-19
ENSG00000168300	PCMTD1	protein-L-isoaspartate (D-aspartate) O-methyltransferase domain containing 1 [Source:HGNC Symbol;Acc:30483]	-1.00636	4.85345	86.7152	1.25327e-20	4.34654e-19
ENSG00000185737	NRG3	neuregulin 3 [Source:HGNC Symbol;Acc:7999]	2.82536	0.936618	86.6985	1.26393e-20	4.37327e-19
ENSG00000177707	PVRL3	poliovirus receptor-related 3 [Source:HGNC Symbol;Acc:17664]	-0.660609	6.37854	86.2729	1.56743e-20	5.41075e-19
ENSG00000261613	RP11-20I23.8		0.675571	7.34216	86.2181	1.61147e-20	5.54983e-19
ENSG00000197557	TTC30A	tetratricopeptide repeat domain 30A [Source:HGNC Symbol;Acc:25853]	-1.33724	3.4517	86.1699	1.65119e-20	5.67341e-19
ENSG00000162772	ATF3	activating transcription factor 3 [Source:HGNC Symbol;Acc:785]	1.19113	4.31395	86.0176	1.7834e-20	6.10217e-19
ENSG00000166123	GPT2	glutamic pyruvate transaminase (alanine aminotransferase) 2 [Source:HGNC Symbol;Acc:18062]	0.736222	6.55068	86.0167	1.78421e-20	6.10217e-19
ENSG00000164442	CITED2	Cbp/p300-interacting transactivator, with Glu/Asp-rich carboxy-terminal domain, 2 [Source:HGNC Symbol;Acc:1987]	-0.927063	4.87461	85.7832	2.0079e-20	6.85137e-19
ENSG00000163462	TRIM46	tripartite motif containing 46 [Source:HGNC Symbol;Acc:19019]	1.18587	4.66893	85.5571	2.25109e-20	7.66355e-19
ENSG00000154639	CXADR	coxsackie virus and adenovirus receptor [Source:HGNC Symbol;Acc:2559]	0.685659	6.28536	85.5525	2.25629e-20	7.66363e-19
ENSG00000137845	ADAM10	ADAM metallopeptidase domain 10 [Source:HGNC Symbol;Acc:188]	-0.552031	7.68444	85.4635	2.36024e-20	7.99835e-19
ENSG00000168702	LRP1B	low density lipoprotein receptor-related protein 1B [Source:HGNC Symbol;Acc:6693]	1.15684	4.31863	85.3674	2.47774e-20	8.37495e-19
ENSG00000066739	ATG2B	autophagy related 2B [Source:HGNC Symbol;Acc:20187]	-0.730355	6.11025	85.3634	2.48268e-20	8.37495e-19
ENSG00000251095	RP11-115D19.1		2.06502	2.7756	85.3493	2.50054e-20	8.41601e-19
ENSG00000128272	ATF4	activating transcription factor 4 (tax-responsive enhancer element B67) [Source:HGNC Symbol;Acc:786]	0.614911	8.52363	85.3009	2.56253e-20	8.60509e-19
ENSG00000182534	MXRA7	matrix-remodelling associated 7 [Source:HGNC Symbol;Acc:7541]	-0.587739	7.02341	85.2919	2.57413e-20	8.62452e-19
ENSG00000100207	TCF20	transcription factor 20 (AR1) [Source:HGNC Symbol;Acc:11631]	0.672277	6.42559	84.789	3.31967e-20	1.10973e-18
ENSG00000117479	SLC19A2	solute carrier family 19 (thiamine transporter), member 2 [Source:HGNC Symbol;Acc:10938]	0.819785	5.41474	84.6795	3.50873e-20	1.17029e-18
ENSG00000162630	B3GALT2	UDP-Gal:betaGlcNAc beta 1,3-galactosyltransferase, polypeptide 2 [Source:HGNC Symbol;Acc:917]	-1.11311	4.22366	84.638	3.58317e-20	1.19243e-18
ENSG00000226958	RNA28S5	RNA, 28S ribosomal 5 [Source:HGNC Symbol;Acc:37659]	-0.663087	8.02882	84.127	4.63994e-20	1.54065e-18
ENSG00000147256	ARHGAP36	Rho GTPase activating protein 36 [Source:HGNC Symbol;Acc:26388]	-1.02384	4.24482	84.0915	4.72394e-20	1.56503e-18
ENSG00000163683	C4orf34	chromosome 4 open reading frame 34 [Source:HGNC Symbol;Acc:27321]	-1.40242	2.9689	84.0011	4.94491e-20	1.63431e-18
ENSG00000183775	KCTD16	potassium channel tetramerisation domain containing 16 [Source:HGNC Symbol;Acc:29244]	2.31454	1.68208	83.9971	4.95512e-20	1.63431e-18
ENSG00000112319	EYA4	eyes absent homolog 4 (Drosophila) [Source:HGNC Symbol;Acc:3522]	-0.75011	5.9134	83.9837	4.98863e-20	1.6417e-18
ENSG00000087116	ADAMTS2	ADAM metallopeptidase with thrombospondin type 1 motif, 2 [Source:HGNC Symbol;Acc:218]	-1.48325	2.79069	83.7778	5.53631e-20	1.8179e-18
ENSG00000144668	ITGA9	integrin, alpha 9 [Source:HGNC Symbol;Acc:6145]	-1.55175	3.03823	83.5435	6.23278e-20	2.04206e-18
ENSG00000213760	ATP6V1G2	ATPase, H+ transporting, lysosomal 13kDa, V1 subunit G2 [Source:HGNC Symbol;Acc:862]	-1.70277	2.21106	83.456	6.51512e-20	2.12985e-18
ENSG00000101463	SYNDIG1	synapse differentiation inducing 1 [Source:HGNC Symbol;Acc:15885]	-2.79992	0.772824	83.2278	7.31222e-20	2.38517e-18
ENSG00000076248	UNG	uracil-DNA glycosylase [Source:HGNC Symbol;Acc:12572]	-0.629761	6.76777	83.1646	7.54964e-20	2.4572e-18
ENSG00000145241	CENPC1	centromere protein C 1 [Source:HGNC Symbol;Acc:1854]	-0.913577	4.7952	83.122	7.71406e-20	2.50521e-18
ENSG00000164118	CEP44	centrosomal protein 44kDa [Source:HGNC Symbol;Acc:29356]	-0.562328	8.18935	82.9506	8.41311e-20	2.72625e-18
ENSG00000145349	CAMK2D	calcium/calmodulin-dependent protein kinase II delta [Source:HGNC Symbol;Acc:1462]	-0.65642	6.40422	82.2782	1.1822e-19	3.82255e-18
ENSG00000122406	RPL5	ribosomal protein L5 [Source:HGNC Symbol;Acc:10360]	0.43	10.7352	82.1543	1.2587e-19	4.06101e-18
ENSG00000187079	TEAD1	TEA domain family member 1 (SV40 transcriptional enhancer factor) [Source:HGNC Symbol;Acc:11714]	-0.506154	8.30715	81.994	1.36498e-19	4.39436e-18
ENSG00000134684	YARS	tyrosyl-tRNA synthetase [Source:HGNC Symbol;Acc:12840]	0.544401	7.92571	81.8125	1.49631e-19	4.80671e-18
ENSG00000104112	SCG3	secretogranin III [Source:HGNC Symbol;Acc:13707]	0.590715	7.75289	81.7154	1.57162e-19	5.03769e-18
ENSG00000231213	PLSCR5	phospholipid scramblase family, member 5 [Source:HGNC Symbol;Acc:19952]	-0.70317	6.1448	81.7059	1.57924e-19	5.05118e-18
ENSG00000134259	NGF	nerve growth factor (beta polypeptide) [Source:HGNC Symbol;Acc:7808]	2.63567	1.01681	81.5349	1.72192e-19	5.49568e-18
ENSG00000069188	SDK2	sidekick cell adhesion molecule 2 [Source:HGNC Symbol;Acc:19308]	-3.27026	0.606072	81.3006	1.93867e-19	6.17415e-18
ENSG00000133112	TPT1	tumor protein, translationally-controlled 1 [Source:HGNC Symbol;Acc:12022]	0.437487	10.5108	80.765	2.54226e-19	8.07904e-18
ENSG00000233280	AC110491.1	Beta/gamma crystallin domain-containing protein 3; cDNA FLJ60082, weakly similar to Uro-adherence factor A [Source:UniProtKB/TrEMBL;Acc:B4DLE8]	0.853659	5.21722	80.6144	2.74347e-19	8.69978e-18
ENSG00000154645	CHODL	chondrolectin [Source:HGNC Symbol;Acc:17807]	1.92852	2.4563	80.4648	2.95929e-19	9.36412e-18
ENSG00000100027	YPEL1	yippee-like 1 (Drosophila) [Source:HGNC Symbol;Acc:12845]	-1.19078	3.59724	80.4438	2.99093e-19	9.44407e-18
ENSG00000121297	TSHZ3	teashirt zinc finger homeobox 3 [Source:HGNC Symbol;Acc:30700]	1.04281	4.20251	80.4054	3.04966e-19	9.60904e-18
ENSG00000073614	KDM5A	lysine (K)-specific demethylase 5A [Source:HGNC Symbol;Acc:9886]	-0.575402	7.01407	80.3006	3.21573e-19	1.01108e-17
ENSG00000148120	C9orf3	chromosome 9 open reading frame 3 [Source:HGNC Symbol;Acc:1361]	-0.840875	5.08899	80.2685	3.26834e-19	1.02544e-17
ENSG00000165659	DACH1	dachshund homolog 1 (Drosophila) [Source:HGNC Symbol;Acc:2663]	-0.718822	5.78846	80.0899	3.57758e-19	1.12009e-17
ENSG00000259787	CTB-85P21.2		3.08883	0.96153	79.9269	3.8853e-19	1.21271e-17
ENSG00000116266	STXBP3	syntaxin binding protein 3 [Source:HGNC Symbol;Acc:11446]	-0.784346	5.68593	79.9246	3.88977e-19	1.21271e-17
ENSG00000152620	NADKD1	NAD kinase domain containing 1 [Source:HGNC Symbol;Acc:26404]	-0.990649	4.46926	79.8218	4.0974e-19	1.27476e-17
ENSG00000113657	DPYSL3	dihydropyrimidinase-like 3 [Source:HGNC Symbol;Acc:3015]	-0.556998	7.21218	79.6961	4.3666e-19	1.35566e-17
ENSG00000099954	CECR2	cat eye syndrome chromosome region, candidate 2 [Source:HGNC Symbol;Acc:1840]	-0.832714	5.19462	79.6231	4.53106e-19	1.40378e-17
ENSG00000158321	AUTS2	autism susceptibility candidate 2 [Source:HGNC Symbol;Acc:14262]	0.563461	7.35035	79.4141	5.03655e-19	1.55437e-17
ENSG00000128923	FAM63B	family with sequence similarity 63, member B [Source:HGNC Symbol;Acc:26954]	-0.727791	5.93908	79.4135	5.03815e-19	1.55437e-17
ENSG00000138131	LOXL4	lysyl oxidase-like 4 [Source:HGNC Symbol;Acc:17171]	-1.46169	3.18484	79.1302	5.81487e-19	1.79028e-17
ENSG00000169710	FASN	fatty acid synthase [Source:HGNC Symbol;Acc:3594]	0.848963	8.8826	79.113	5.86582e-19	1.80222e-17
ENSG00000255112	CHMP1B	charged multivesicular body protein 1B [Source:HGNC Symbol;Acc:24287]	-0.719107	5.88981	79.073	5.98562e-19	1.83522e-17
ENSG00000128872	TMOD2	tropomodulin 2 (neuronal) [Source:HGNC Symbol;Acc:11872]	0.498965	8.29384	78.9512	6.36643e-19	1.94794e-17
ENSG00000126016	AMOT	angiomotin [Source:HGNC Symbol;Acc:17810]	-0.955795	4.53242	78.8648	6.65104e-19	2.03083e-17
ENSG00000215472	RP11-110H1.2	60S ribosomal protein L17 [Source:UniProtKB/Swiss-Prot;Acc:P18621]	0.471431	9.4212	78.7913	6.90294e-19	2.10341e-17
ENSG00000109618	SEPSECS	Sep (O-phosphoserine) tRNA:Sec (selenocysteine) tRNA synthase [Source:HGNC Symbol;Acc:30605]	-0.916215	4.6967	78.7238	7.1431e-19	2.17212e-17
ENSG00000176014	TUBB6	tubulin, beta 6 class V [Source:HGNC Symbol;Acc:20776]	-0.770664	5.83794	78.6703	7.33907e-19	2.22714e-17
ENSG00000184979	USP18	ubiquitin specific peptidase 18 [Source:HGNC Symbol;Acc:12616]	-1.56303	2.9822	78.6631	7.36591e-19	2.23071e-17
ENSG00000160058	BSDC1	BSD domain containing 1 [Source:HGNC Symbol;Acc:25501]	-0.705649	6.19182	78.6236	7.51458e-19	2.27109e-17
ENSG00000108406	DHX40	DEAH (Asp-Glu-Ala-His) box polypeptide 40 [Source:HGNC Symbol;Acc:18018]	-0.514062	8.56706	78.2311	9.16632e-19	2.76464e-17
ENSG00000117543	DPH5	DPH5 homolog (S. cerevisiae) [Source:HGNC Symbol;Acc:24270]	0.684699	6.06909	78.2071	9.27844e-19	2.79277e-17
ENSG00000099194	SCD	stearoyl-CoA desaturase (delta-9-desaturase) [Source:HGNC Symbol;Acc:10571]	0.462394	8.9951	78.1254	9.67015e-19	2.90477e-17
ENSG00000165959	CLMN	calmin (calponin-like, transmembrane) [Source:HGNC Symbol;Acc:19972]	-1.53178	2.64238	78.0607	9.99241e-19	2.9955e-17
ENSG00000085552	IGSF9	immunoglobulin superfamily, member 9 [Source:HGNC Symbol;Acc:18132]	1.02206	5.73056	77.9763	1.04282e-18	3.11983e-17
ENSG00000135414	GDF11	growth differentiation factor 11 [Source:HGNC Symbol;Acc:4216]	0.930942	4.82129	77.9167	1.07477e-18	3.20892e-17
ENSG00000158234	FAIM	Fas apoptotic inhibitory molecule [Source:HGNC Symbol;Acc:18703]	0.871985	4.90493	77.8463	1.11376e-18	3.31866e-17
ENSG00000175567	UCP2	uncoupling protein 2 (mitochondrial, proton carrier) [Source:HGNC Symbol;Acc:12518]	-1.10801	4.43566	77.8315	1.12216e-18	3.33695e-17
ENSG00000214595	EML6	echinoderm microtubule associated protein like 6 [Source:HGNC Symbol;Acc:35412]	1.33073	3.27074	77.7278	1.18265e-18	3.5098e-17
ENSG00000166783	KIAA0430	KIAA0430 [Source:HGNC Symbol;Acc:29562]	-0.62459	6.42505	77.3833	1.40801e-18	4.17025e-17
ENSG00000170419	VSTM2A	V-set and transmembrane domain containing 2A [Source:HGNC Symbol;Acc:28499]	-0.761201	5.68188	77.1088	1.61793e-18	4.78242e-17
ENSG00000162409	PRKAA2	protein kinase, AMP-activated, alpha 2 catalytic subunit [Source:HGNC Symbol;Acc:9377]	0.713514	5.88464	77.0099	1.70104e-18	5.01807e-17
ENSG00000166900	STX3	syntaxin 3 [Source:HGNC Symbol;Acc:11438]	0.845039	5.24965	76.9831	1.72424e-18	5.0764e-17
ENSG00000221866	PLXNA4	plexin A4 [Source:HGNC Symbol;Acc:9102]	-2.86471	0.654308	76.685	2.0052e-18	5.89158e-17
ENSG00000135916	ITM2C	integral membrane protein 2C [Source:HGNC Symbol;Acc:6175]	-1.08659	4.47978	76.6812	2.00908e-18	5.89158e-17
ENSG00000247626	MARS2	methionyl-tRNA synthetase 2, mitochondrial [Source:HGNC Symbol;Acc:25133]	0.894743	5.05177	76.5573	2.13915e-18	6.26062e-17
ENSG00000131018	SYNE1	spectrin repeat containing, nuclear envelope 1 [Source:HGNC Symbol;Acc:17089]	-0.807694	5.33727	76.5501	2.14692e-18	6.27095e-17
ENSG00000106052	TAX1BP1	Tax1 (human T-cell leukemia virus type I) binding protein 1 [Source:HGNC Symbol;Acc:11575]	-0.579046	7.02203	76.486	2.21777e-18	6.46515e-17
ENSG00000091490	SEL1L3	sel-1 suppressor of lin-12-like 3 (C. elegans) [Source:HGNC Symbol;Acc:29108]	-1.32311	3.45121	76.2965	2.44118e-18	7.10246e-17
ENSG00000144821	MYH15	myosin, heavy chain 15 [Source:HGNC Symbol;Acc:31073]	1.55931	2.95685	76.2444	2.50645e-18	7.27803e-17
ENSG00000160271	RALGDS	ral guanine nucleotide dissociation stimulator [Source:HGNC Symbol;Acc:9842]	0.745806	7.17156	76.1314	2.6541e-18	7.69169e-17
ENSG00000225840	RNA18S5	RNA, 18S ribosomal 5 [Source:HGNC Symbol;Acc:37657]	-0.80568	6.54368	75.81	3.12322e-18	9.03356e-17
ENSG00000175832	ETV4	ets variant 4 [Source:HGNC Symbol;Acc:3493]	-3.1433	1.89218	75.5538	3.55577e-18	1.02646e-16
ENSG00000120658	ENOX1	ecto-NOX disulfide-thiol exchanger 1 [Source:HGNC Symbol;Acc:25474]	-0.744676	5.6035	75.5458	3.5703e-18	1.02865e-16
ENSG00000131378	RFTN1	raftlin, lipid raft linker 1 [Source:HGNC Symbol;Acc:30278]	-1.49959	2.99856	75.4951	3.66307e-18	1.05333e-16
ENSG00000169891	REPS2	RALBP1 associated Eps domain containing 2 [Source:HGNC Symbol;Acc:9963]	-1.96738	1.44596	75.473	3.70443e-18	1.06316e-16
ENSG00000139651	ZNF740	zinc finger protein 740 [Source:HGNC Symbol;Acc:27465]	-0.830378	5.32534	75.4338	3.77871e-18	1.08238e-16
ENSG00000102317	RBM3	RNA binding motif (RNP1, RRM) protein 3 [Source:HGNC Symbol;Acc:9900]	-0.59748	7.82496	75.3204	4.00195e-18	1.14411e-16
ENSG00000167549	CORO6	coronin 6 [Source:HGNC Symbol;Acc:21356]	-2.34806	1.56833	75.1688	4.32147e-18	1.23308e-16
ENSG00000143228	NUF2	NUF2, NDC80 kinetochore complex component, homolog (S. cerevisiae) [Source:HGNC Symbol;Acc:14621]	-0.599571	7.4233	75.0923	4.49216e-18	1.27931e-16
ENSG00000142937	RPS8	ribosomal protein S8 [Source:HGNC Symbol;Acc:10441]	0.472372	9.51646	75.0101	4.68318e-18	1.33115e-16
ENSG00000085741	WNT11	wingless-type MMTV integration site family, member 11 [Source:HGNC Symbol;Acc:12776]	1.66936	2.36939	74.9496	4.82883e-18	1.36993e-16
ENSG00000111961	SASH1	SAM and SH3 domain containing 1 [Source:HGNC Symbol;Acc:19182]	-0.679835	5.97471	74.9402	4.85182e-18	1.37382e-16
ENSG00000144579	CTDSP1	CTD (carboxy-terminal domain, RNA polymerase II, polypeptide A) small phosphatase 1 [Source:HGNC Symbol;Acc:21614]	-1.23783	3.9651	74.8602	5.05263e-18	1.42795e-16
ENSG00000101444	AHCY	adenosylhomocysteinase [Source:HGNC Symbol;Acc:343]	0.545442	7.70462	74.8529	5.07115e-18	1.43045e-16
ENSG00000113369	ARRDC3	arrestin domain containing 3 [Source:HGNC Symbol;Acc:29263]	0.701099	5.91138	74.827	5.13824e-18	1.44662e-16
ENSG00000135902	CHRND	cholinergic receptor, nicotinic, delta (muscle) [Source:HGNC Symbol;Acc:1965]	4.48547	-0.543368	74.5944	5.78081e-18	1.62444e-16
ENSG00000106571	GLI3	GLI family zinc finger 3 [Source:HGNC Symbol;Acc:4319]	0.568005	6.93247	74.5218	5.99718e-18	1.68205e-16
ENSG00000133134	BEX2	brain expressed X-linked 2 [Source:HGNC Symbol;Acc:30933]	-1.08392	4.12844	74.2744	6.79791e-18	1.90303e-16
ENSG00000213853	EMP2	epithelial membrane protein 2 [Source:HGNC Symbol;Acc:3334]	-0.763554	5.38641	74.1224	7.34187e-18	2.05143e-16
ENSG00000170275	CRTAP	cartilage associated protein [Source:HGNC Symbol;Acc:2379]	0.670574	6.1439	74.0903	7.46259e-18	2.08123e-16
ENSG00000171246	NPTX1	neuronal pentraxin I [Source:HGNC Symbol;Acc:7952]	-1.27397	3.68864	73.5922	9.60418e-18	2.67346e-16
ENSG00000076356	PLXNA2	plexin A2 [Source:HGNC Symbol;Acc:9100]	-2.11599	1.71393	73.2743	1.1283e-17	3.13489e-16
ENSG00000043143	PHF15	PHD finger protein 15 [Source:HGNC Symbol;Acc:22984]	-1.66357	2.30629	73.0122	1.28852e-17	3.57335e-16
ENSG00000130766	SESN2	sestrin 2 [Source:HGNC Symbol;Acc:20746]	0.961608	5.07567	72.9937	1.30064e-17	3.60021e-16
ENSG00000198034	RPS4X	ribosomal protein S4, X-linked [Source:HGNC Symbol;Acc:10424]	0.426494	10.0042	72.988	1.30444e-17	3.60399e-16
ENSG00000183454	GRIN2A	glutamate receptor, ionotropic, N-methyl D-aspartate 2A [Source:HGNC Symbol;Acc:4585]	3.54883	0.0891423	72.7111	1.50084e-17	4.1389e-16
ENSG00000067596	DHX8	DEAH (Asp-Glu-Ala-His) box polypeptide 8 [Source:HGNC Symbol;Acc:2749]	-0.518309	7.59541	72.6962	1.51222e-17	4.16253e-16
ENSG00000169100	SLC25A6	solute carrier family 25 (mitochondrial carrier; adenine nucleotide translocator), member 6 [Source:HGNC Symbol;Acc:10992]	0.728237	7.64198	72.6691	1.53316e-17	4.21236e-16
ENSG00000157570	TSPAN18	tetraspanin 18 [Source:HGNC Symbol;Acc:20660]	-0.787673	5.76164	72.6602	1.54011e-17	4.22362e-16
ENSG00000170836	PPM1D	protein phosphatase, Mg2+/Mn2+ dependent, 1D [Source:HGNC Symbol;Acc:9277]	-0.615849	7.03981	72.1033	2.04224e-17	5.59029e-16
ENSG00000169684	CHRNA5	cholinergic receptor, nicotinic, alpha 5 (neuronal) [Source:HGNC Symbol;Acc:1959]	-0.855097	5.0874	71.8282	2.34776e-17	6.41475e-16
ENSG00000084774	CAD	carbamoyl-phosphate synthetase 2, aspartate transcarbamylase, and dihydroorotase [Source:HGNC Symbol;Acc:1424]	0.683898	6.97715	71.7979	2.38406e-17	6.50194e-16
ENSG00000186480	INSIG1	insulin induced gene 1 [Source:HGNC Symbol;Acc:6083]	0.681365	6.02314	71.6201	2.60879e-17	7.10176e-16
ENSG00000168461	RAB31	RAB31, member RAS oncogene family [Source:HGNC Symbol;Acc:9771]	-1.54663	2.57654	71.5148	2.75185e-17	7.47747e-16
ENSG00000115896	PLCL1	phospholipase C-like 1 [Source:HGNC Symbol;Acc:9063]	-3.47165	0.184404	71.5054	2.76495e-17	7.49931e-16
ENSG00000152661	GJA1	gap junction protein, alpha 1, 43kDa [Source:HGNC Symbol;Acc:4274]	0.5115	8.13884	71.459	2.83085e-17	7.66398e-16
ENSG00000198796	ALPK2	alpha-kinase 2 [Source:HGNC Symbol;Acc:20565]	0.992132	4.39889	71.3811	2.94486e-17	7.9581e-16
ENSG00000078018	MAP2	microtubule-associated protein 2 [Source:HGNC Symbol;Acc:6839]	0.64023	6.18805	71.2773	3.10393e-17	8.3727e-16
ENSG00000178445	GLDC	glycine dehydrogenase (decarboxylating) [Source:HGNC Symbol;Acc:4313]	0.624934	6.16683	71.2662	3.12136e-17	8.40441e-16
ENSG00000116030	SUMO1	SMT3 suppressor of mif two 3 homolog 1 (S. cerevisiae) [Source:HGNC Symbol;Acc:12502]	-0.540942	7.40206	71.2255	3.18645e-17	8.56409e-16
ENSG00000156475	PPP2R2B	protein phosphatase 2, regulatory subunit B, beta [Source:HGNC Symbol;Acc:9305]	1.02295	3.93099	71.0995	3.39649e-17	9.11208e-16
ENSG00000141510	TP53	tumor protein p53 [Source:HGNC Symbol;Acc:11998]	-0.705262	5.85066	71.0885	3.41553e-17	9.14658e-16
ENSG00000198785	GRIN3A	glutamate receptor, ionotropic, N-methyl-D-aspartate 3A [Source:HGNC Symbol;Acc:16767]	-1.01694	4.35954	70.8676	3.82015e-17	1.02117e-15
ENSG00000186918	ZNF395	zinc finger protein 395 [Source:HGNC Symbol;Acc:18737]	-0.871446	4.55724	70.7692	4.0156e-17	1.07148e-15
ENSG00000119397	CNTRL	centriolin [Source:HGNC Symbol;Acc:1858]	-0.694195	5.82856	70.7005	4.15785e-17	1.10744e-15
ENSG00000133703	KRAS	v-Ki-ras2 Kirsten rat sarcoma viral oncogene homolog [Source:HGNC Symbol;Acc:6407]	-0.582284	7.08464	70.542	4.50576e-17	1.19795e-15
ENSG00000111371	SLC38A1	solute carrier family 38, member 1 [Source:HGNC Symbol;Acc:13447]	0.481632	8.16503	70.45	4.72085e-17	1.25289e-15
ENSG00000145335	SNCA	synuclein, alpha (non A4 component of amyloid precursor) [Source:HGNC Symbol;Acc:11138]	1.39765	3.35808	70.4227	4.78659e-17	1.26806e-15
ENSG00000132824	SERINC3	serine incorporator 3 [Source:HGNC Symbol;Acc:11699]	-0.687746	5.71855	70.3641	4.93097e-17	1.30398e-15
ENSG00000124766	SOX4	SRY (sex determining region Y)-box 4 [Source:HGNC Symbol;Acc:11200]	0.506888	7.83293	70.3324	5.01088e-17	1.32275e-15
ENSG00000130600	H19	H19, imprinted maternally expressed transcript (non-protein coding) [Source:HGNC Symbol;Acc:4713]	-1.19225	3.26302	70.1246	5.5673e-17	1.46701e-15
ENSG00000122691	TWIST1	twist homolog 1 (Drosophila) [Source:HGNC Symbol;Acc:12428]	0.634116	6.24279	70.0902	5.66526e-17	1.49017e-15
ENSG00000128607	KLHDC10	kelch domain containing 10 [Source:HGNC Symbol;Acc:22194]	0.551421	6.82208	70.076	5.70639e-17	1.49833e-15
ENSG00000138641	HERC3	HECT and RLD domain containing E3 ubiquitin protein ligase 3 [Source:HGNC Symbol;Acc:4876]	-1.27349	3.04232	69.9233	6.16567e-17	1.61606e-15
ENSG00000205336	GPR56	G protein-coupled receptor 56 [Source:HGNC Symbol;Acc:4512]	1.24386	3.37419	69.9192	6.17837e-17	1.61653e-15
ENSG00000110328	GALNTL4	UDP-N-acetyl-alpha-D-galactosamine:polypeptide N-acetylgalactosaminyltransferase-like 4 [Source:HGNC Symbol;Acc:30488]	1.63095	2.33812	69.8815	6.29759e-17	1.64482e-15
ENSG00000017483	SLC38A5	solute carrier family 38, member 5 [Source:HGNC Symbol;Acc:18070]	0.734518	5.54563	69.8057	6.54423e-17	1.7035e-15
ENSG00000112186	CAP2	CAP, adenylate cyclase-associated protein, 2 (yeast) [Source:HGNC Symbol;Acc:20039]	-0.563419	6.80241	69.8054	6.54528e-17	1.7035e-15
ENSG00000152932	RAB3C	RAB3C, member RAS oncogene family [Source:HGNC Symbol;Acc:30269]	0.835085	5.06732	69.7878	6.604e-17	1.71577e-15
ENSG00000187634	SAMD11	sterile alpha motif domain containing 11 [Source:HGNC Symbol;Acc:28706]	-1.21675	4.57024	69.7247	6.81852e-17	1.7684e-15
ENSG00000135047	CTSL1	cathepsin L1 [Source:HGNC Symbol;Acc:2537]	-0.760869	5.53939	69.5064	7.61686e-17	1.97199e-15
ENSG00000260838	RP11-531A24.3		-0.885926	5.03334	69.4394	7.87997e-17	2.03655e-15
ENSG00000125398	SOX9	SRY (sex determining region Y)-box 9 [Source:HGNC Symbol;Acc:11204]	-1.12992	3.54812	69.4004	8.03737e-17	2.07361e-15
ENSG00000218336	ODZ3	odz, odd Oz/ten-m homolog 3 (Drosophila) [Source:HGNC Symbol;Acc:29944]	0.67027	5.83795	69.2619	8.62184e-17	2.22054e-15
ENSG00000242257	-	A)	-0.978513	4.4584	69.2209	8.80286e-17	2.26322e-15
ENSG00000138018	EPT1	ethanolaminephosphotransferase 1 (CDP-ethanolamine-specific) [Source:HGNC Symbol;Acc:29361]	0.522331	7.39353	69.211	8.84731e-17	2.27071e-15
ENSG00000112309	B3GAT2	beta-1,3-glucuronyltransferase 2 (glucuronosyltransferase S) [Source:HGNC Symbol;Acc:922]	0.68721	6.10551	69.145	9.14852e-17	2.34395e-15
ENSG00000166046	TCP11L2	t-complex 11 (mouse)-like 2 [Source:HGNC Symbol;Acc:28627]	-3.30942	0.332321	69.1051	9.33543e-17	2.38771e-15
ENSG00000108797	CNTNAP1	contactin associated protein 1 [Source:HGNC Symbol;Acc:8011]	0.845168	5.4589	69.0534	9.58322e-17	2.44686e-15
ENSG00000175061	C17orf76-AS1	C17orf76 antisense RNA 1 [Source:HGNC Symbol;Acc:28619]	0.45436	8.44496	69.0143	9.77501e-17	2.49153e-15
ENSG00000117632	STMN1	stathmin 1 [Source:HGNC Symbol;Acc:6510]	-0.466237	10.5046	68.8838	1.04437e-16	2.65741e-15
ENSG00000132780	NASP	nuclear autoantigenic sperm protein (histone-binding) [Source:HGNC Symbol;Acc:7644]	-0.460184	8.99893	68.6786	1.15891e-16	2.94379e-15
ENSG00000234493	GS1-421I3.2		-3.19233	0.0215295	68.5396	1.24356e-16	3.15342e-15
ENSG00000174446	SNAPC5	small nuclear RNA activating complex, polypeptide 5, 19kDa [Source:HGNC Symbol;Acc:15484]	-0.869015	4.93928	68.4923	1.27373e-16	3.2244e-15
ENSG00000135837	CEP350	centrosomal protein 350kDa [Source:HGNC Symbol;Acc:24238]	-0.472039	7.97756	68.4447	1.30484e-16	3.29751e-15
ENSG00000170873	MTSS1	metastasis suppressor 1 [Source:HGNC Symbol;Acc:20443]	-0.844632	4.77525	68.3771	1.35037e-16	3.40675e-15
ENSG00000184100	RP11-67F24.1		0.957362	4.16257	68.3068	1.39936e-16	3.52433e-15
ENSG00000138496	PARP9	poly (ADP-ribose) polymerase family, member 9 [Source:HGNC Symbol;Acc:24118]	-1.96612	1.89951	68.1252	1.53438e-16	3.85784e-15
ENSG00000146674	IGFBP3	insulin-like growth factor binding protein 3 [Source:HGNC Symbol;Acc:5472]	-2.51865	1.32116	68.0919	1.56048e-16	3.9168e-15
ENSG00000104320	NBN	nibrin [Source:HGNC Symbol;Acc:7652]	-0.603016	7.31465	67.7712	1.83616e-16	4.60096e-15
ENSG00000049759	NEDD4L	neural precursor cell expressed, developmentally down-regulated 4-like, E3 ubiquitin protein ligase [Source:HGNC Symbol;Acc:7728]	-0.757303	5.27863	67.7225	1.88199e-16	4.70784e-15
ENSG00000081051	AFP	alpha-fetoprotein [Source:HGNC Symbol;Acc:317]	5.37396	-0.139603	67.5948	2.00796e-16	5.01449e-15
ENSG00000136141	LRCH1	leucine-rich repeats and calponin homology (CH) domain containing 1 [Source:HGNC Symbol;Acc:20309]	-0.803042	5.07607	67.5541	2.04987e-16	5.11053e-15
ENSG00000229891	Z83851.1		2.82773	0.189377	67.5157	2.0902e-16	5.2023e-15
ENSG00000185201	IFITM2	interferon induced transmembrane protein 2 [Source:HGNC Symbol;Acc:5413]	-2.73631	0.59193	67.4829	2.1252e-16	5.28055e-15
ENSG00000131196	NFATC1	nuclear factor of activated T-cells, cytoplasmic, calcineurin-dependent 1 [Source:HGNC Symbol;Acc:7775]	-1.49936	2.39393	67.2339	2.41136e-16	5.98154e-15
ENSG00000171723	GPHN	gephyrin [Source:HGNC Symbol;Acc:15465]	0.663225	5.76995	67.1073	2.57119e-16	6.36734e-15
ENSG00000185630	PBX1	pre-B-cell leukemia homeobox 1 [Source:HGNC Symbol;Acc:8632]	-0.571551	6.49441	66.9732	2.75223e-16	6.8043e-15
ENSG00000164542	KIAA0895	KIAA0895 [Source:HGNC Symbol;Acc:22206]	0.969199	4.34598	66.8868	2.87549e-16	7.09719e-15
ENSG00000170989	S1PR1	sphingosine-1-phosphate receptor 1 [Source:HGNC Symbol;Acc:3165]	3.22367	0.232805	66.5735	3.37081e-16	8.30588e-15
ENSG00000162129	CLPB	ClpB caseinolytic peptidase B homolog (E. coli) [Source:HGNC Symbol;Acc:30664]	-0.891827	4.87211	66.5491	3.41278e-16	8.39532e-15
ENSG00000188313	PLSCR1	phospholipid scramblase 1 [Source:HGNC Symbol;Acc:9092]	-0.856174	4.76309	66.2864	3.89941e-16	9.57651e-15
ENSG00000169105	CHST14	carbohydrate (N-acetylgalactosamine 4-0) sulfotransferase 14 [Source:HGNC Symbol;Acc:24464]	-1.01325	4.00274	66.2326	4.00721e-16	9.82495e-15
ENSG00000138613	APH1B	anterior pharynx defective 1 homolog B (C. elegans) [Source:HGNC Symbol;Acc:24080]	-1.0346	4.14739	66.2026	4.06881e-16	9.9595e-15
ENSG00000100077	ADRBK2	adrenergic, beta, receptor kinase 2 [Source:HGNC Symbol;Acc:290]	-0.785404	5.12142	66.0627	4.36815e-16	1.06746e-14
ENSG00000151414	NEK7	NIMA (never in mitosis gene a)-related kinase 7 [Source:HGNC Symbol;Acc:13386]	-0.603435	7.07074	66.0358	4.42803e-16	1.08031e-14
ENSG00000162998	FRZB	frizzled-related protein [Source:HGNC Symbol;Acc:3959]	-0.865882	4.72749	66.0305	4.43995e-16	1.08144e-14
ENSG00000158615	PPP1R15B	protein phosphatase 1, regulatory subunit 15B [Source:HGNC Symbol;Acc:14951]	0.468928	8.12435	65.9437	4.63995e-16	1.12829e-14
ENSG00000141179	PCTP	phosphatidylcholine transfer protein [Source:HGNC Symbol;Acc:8752]	-0.857864	4.62553	65.9219	4.69144e-16	1.13894e-14
ENSG00000080709	KCNN2	potassium intermediate/small conductance calcium-activated channel, subfamily N, member 2 [Source:HGNC Symbol;Acc:6291]	1.17783	3.48931	65.7327	5.16422e-16	1.25167e-14
ENSG00000109929	SC5DL	sterol-C5-desaturase (ERG3 delta-5-desaturase homolog, S. cerevisiae)-like [Source:HGNC Symbol;Acc:10547]	-0.672813	5.76634	65.7042	5.2393e-16	1.26779e-14
ENSG00000235655	H3F3AP4	H3 histone, family 3A, pseudogene 4 [Source:HGNC Symbol;Acc:42980]	-0.602365	6.15515	65.6903	5.27643e-16	1.27418e-14
ENSG00000152784	PRDM8	PR domain containing 8 [Source:HGNC Symbol;Acc:13993]	-0.522118	6.97651	65.6879	5.28293e-16	1.27418e-14
ENSG00000084093	REST	RE1-silencing transcription factor [Source:HGNC Symbol;Acc:9966]	-0.518775	6.97593	65.613	5.48764e-16	1.32141e-14
ENSG00000173230	GOLGB1	golgin B1 [Source:HGNC Symbol;Acc:4429]	-0.501385	7.44066	65.5269	5.73247e-16	1.37812e-14
ENSG00000143149	ALDH9A1	aldehyde dehydrogenase 9 family, member A1 [Source:HGNC Symbol;Acc:412]	-0.514099	7.1536	65.4898	5.84159e-16	1.40208e-14
ENSG00000163638	ADAMTS9	ADAM metallopeptidase with thrombospondin type 1 motif, 9 [Source:HGNC Symbol;Acc:13202]	-0.608774	6.07255	65.3647	6.22442e-16	1.49155e-14
ENSG00000152684	PELO	pelota homolog (Drosophila) [Source:HGNC Symbol;Acc:8829]	-0.709054	5.53166	65.2743	6.5166e-16	1.55904e-14
ENSG00000063180	CA11	carbonic anhydrase XI [Source:HGNC Symbol;Acc:1370]	0.965887	4.63374	65.1533	6.92919e-16	1.65507e-14
ENSG00000137075	RNF38	ring finger protein 38 [Source:HGNC Symbol;Acc:18052]	-0.564691	6.77099	64.9953	7.50775e-16	1.79037e-14
ENSG00000119537	KDSR	3-ketodihydrosphingosine reductase [Source:HGNC Symbol;Acc:4021]	-1.03565	4.42234	64.9314	7.75509e-16	1.84638e-14
ENSG00000144642	RBMS3	RNA binding motif, single stranded interacting protein 3 [Source:HGNC Symbol;Acc:13427]	-0.641791	5.87222	64.9237	7.78546e-16	1.85064e-14
ENSG00000166016	ABTB2	ankyrin repeat and BTB (POZ) domain containing 2 [Source:HGNC Symbol;Acc:23842]	2.04385	2.04407	64.8765	7.97418e-16	1.89246e-14
ENSG00000140988	RPS2	ribosomal protein S2 [Source:HGNC Symbol;Acc:10404]	0.522958	9.71083	64.8704	7.99887e-16	1.89528e-14
ENSG00000072041	SLC6A15	solute carrier family 6 (neutral amino acid transporter), member 15 [Source:HGNC Symbol;Acc:13621]	-0.577861	7.81869	64.6725	8.84387e-16	2.09215e-14
ENSG00000102935	ZNF423	zinc finger protein 423 [Source:HGNC Symbol;Acc:16762]	-0.865777	5.04982	64.6653	8.87651e-16	2.09653e-14
ENSG00000106100	NOD1	nucleotide-binding oligomerization domain containing 1 [Source:HGNC Symbol;Acc:16390]	1.22644	3.71603	64.3535	1.03985e-15	2.4521e-14
ENSG00000153443	FAM100A	family with sequence similarity 100, member A [Source:HGNC Symbol;Acc:29576]	-1.40208	3.02807	64.2363	1.10357e-15	2.59822e-14
ENSG00000101825	MXRA5	matrix-remodelling associated 5 [Source:HGNC Symbol;Acc:7539]	-0.94858	4.38948	64.1102	1.17654e-15	2.76561e-14
ENSG00000166508	MCM7	minichromosome maintenance complex component 7 [Source:HGNC Symbol;Acc:6950]	-0.53726	8.01775	63.9573	1.27143e-15	2.98173e-14
ENSG00000143401	ANP32E	acidic (leucine-rich) nuclear phosphoprotein 32 family, member E [Source:HGNC Symbol;Acc:16673]	-0.464613	10.3708	63.9557	1.27251e-15	2.98173e-14
ENSG00000144381	HSPD1	heat shock 60kDa protein 1 (chaperonin) [Source:HGNC Symbol;Acc:5261]	0.424779	10.331	63.9056	1.30523e-15	3.05358e-14
ENSG00000132680	KIAA0907	KIAA0907 [Source:HGNC Symbol;Acc:29145]	0.479113	8.74812	63.8609	1.33519e-15	3.11875e-14
ENSG00000154930	ACSS1	acyl-CoA synthetase short-chain family member 1 [Source:HGNC Symbol;Acc:16091]	-1.52177	2.3938	63.8155	1.36633e-15	3.18646e-14
ENSG00000122180	MYOG	myogenin (myogenic factor 4) [Source:HGNC Symbol;Acc:7612]	1.35778	2.88133	63.6708	1.47052e-15	3.42404e-14
ENSG00000109819	PPARGC1A	peroxisome proliferator-activated receptor gamma, coactivator 1 alpha [Source:HGNC Symbol;Acc:9237]	-0.749973	5.36587	63.6514	1.48502e-15	3.45239e-14
ENSG00000188176	SMTNL2	smoothelin-like 2 [Source:HGNC Symbol;Acc:24764]	-2.17237	0.918578	63.5913	1.53107e-15	3.55386e-14
ENSG00000111641	NOP2	NOP2 nucleolar protein homolog (yeast) [Source:HGNC Symbol;Acc:7867]	0.561422	6.7996	63.5682	1.54907e-15	3.59001e-14
ENSG00000178035	IMPDH2	IMP (inosine 5'-monophosphate) dehydrogenase 2 [Source:HGNC Symbol;Acc:6053]	0.475594	7.74322	63.5297	1.57965e-15	3.65515e-14
ENSG00000080200	CRYBG3	beta-gamma crystallin domain containing 3 [Source:HGNC Symbol;Acc:34427]	0.747024	5.17795	63.4788	1.621e-15	3.74498e-14
ENSG00000008018	PSMB1	proteasome (prosome, macropain) subunit, beta type, 1 [Source:HGNC Symbol;Acc:9537]	-0.454497	8.00916	63.406	1.68201e-15	3.87989e-14
ENSG00000104529	EEF1D	eukaryotic translation elongation factor 1 delta (guanine nucleotide exchange protein) [Source:HGNC Symbol;Acc:3211]	0.720656	7.06733	63.3245	1.7531e-15	4.03759e-14
ENSG00000123104	ITPR2	inositol 1,4,5-trisphosphate receptor, type 2 [Source:HGNC Symbol;Acc:6181]	0.737252	5.39098	63.2385	1.83137e-15	4.21129e-14
ENSG00000156804	FBXO32	F-box protein 32 [Source:HGNC Symbol;Acc:16731]	-1.84925	1.54708	63.2263	1.84271e-15	4.2308e-14
ENSG00000129128	SPCS3	signal peptidase complex subunit 3 homolog (S. cerevisiae) [Source:HGNC Symbol;Acc:26212]	-0.533378	7.22752	63.1187	1.94615e-15	4.46137e-14
ENSG00000008083	JARID2	jumonji, AT rich interactive domain 2 [Source:HGNC Symbol;Acc:6196]	-0.579003	6.30241	63.056	2.00914e-15	4.59867e-14
ENSG00000182379	NXPH4	neurexophilin 4 [Source:HGNC Symbol;Acc:8078]	4.9758	-0.544937	63.0392	2.02632e-15	4.63083e-14
ENSG00000187653	TMSB4XP8	thymosin beta 4, X-linked pseudogene 8 [Source:HGNC Symbol;Acc:11885]	-0.710891	5.28619	62.9502	2.11994e-15	4.83733e-14
ENSG00000100219	XBP1	X-box binding protein 1 [Source:HGNC Symbol;Acc:12801]	0.721375	6.19754	62.8515	2.22896e-15	5.07827e-14
ENSG00000130508	PXDN	peroxidasin homolog (Drosophila) [Source:HGNC Symbol;Acc:14966]	0.8582	4.8322	62.8261	2.25785e-15	5.13618e-14
ENSG00000180008	SOCS4	suppressor of cytokine signaling 4 [Source:HGNC Symbol;Acc:19392]	0.499733	7.66035	62.7987	2.28949e-15	5.20016e-14
ENSG00000137834	SMAD6	SMAD family member 6 [Source:HGNC Symbol;Acc:6772]	-0.890447	4.62099	62.5923	2.54252e-15	5.76602e-14
ENSG00000164741	DLC1	deleted in liver cancer 1 [Source:HGNC Symbol;Acc:2897]	-0.463353	7.54633	62.5318	2.62179e-15	5.93672e-14
ENSG00000182568	SATB1	SATB homeobox 1 [Source:HGNC Symbol;Acc:10541]	-0.45847	8.19894	62.5173	2.64119e-15	5.9715e-14
ENSG00000172869	DMXL1	Dmx-like 1 [Source:HGNC Symbol;Acc:2937]	-0.57563	6.33241	62.4226	2.77129e-15	6.25611e-14
ENSG00000095637	SORBS1	sorbin and SH3 domain containing 1 [Source:HGNC Symbol;Acc:14565]	-1.32308	2.56405	62.3879	2.82057e-15	6.35765e-14
ENSG00000084636	COL16A1	collagen, type XVI, alpha 1 [Source:HGNC Symbol;Acc:2193]	1.26492	3.56854	62.2911	2.96262e-15	6.66771e-14
ENSG00000182022	CHST15	carbohydrate (N-acetylgalactosamine 4-sulfate 6-O) sulfotransferase 15 [Source:HGNC Symbol;Acc:18137]	0.665293	6.0928	62.2243	3.06479e-15	6.88718e-14
ENSG00000085491	SLC25A24	solute carrier family 25 (mitochondrial carrier; phosphate carrier), member 24 [Source:HGNC Symbol;Acc:20662]	-0.563376	7.28178	62.2058	3.09368e-15	6.94155e-14
ENSG00000130940	CASZ1	castor zinc finger 1 [Source:HGNC Symbol;Acc:26002]	-1.91755	2.26394	62.0895	3.28203e-15	7.35304e-14
ENSG00000117707	PROX1	prospero homeobox 1 [Source:HGNC Symbol;Acc:9459]	0.552535	6.59445	62.0438	3.35901e-15	7.51413e-14
ENSG00000066279	ASPM	asp (abnormal spindle) homolog, microcephaly associated (Drosophila) [Source:HGNC Symbol;Acc:19048]	-0.458542	8.28352	61.9305	3.55801e-15	7.94729e-14
ENSG00000177410	ZNFX1-AS1	ZNFX1 antisense RNA 1 [Source:HGNC Symbol;Acc:33101]	0.585756	6.34001	61.9271	3.56414e-15	7.949e-14
ENSG00000137309	HMGA1	high mobility group AT-hook 1 [Source:HGNC Symbol;Acc:5010]	0.70485	7.75979	61.8418	3.72194e-15	8.28845e-14
ENSG00000234741	GAS5	growth arrest-specific 5 (non-protein coding) [Source:HGNC Symbol;Acc:16355]	0.425411	8.95966	61.7898	3.82143e-15	8.49724e-14
ENSG00000143858	SYT2	synaptotagmin II [Source:HGNC Symbol;Acc:11510]	-0.826287	4.7201	61.7438	3.91191e-15	8.68538e-14
ENSG00000109680	TBC1D19	TBC1 domain family, member 19 [Source:HGNC Symbol;Acc:25624]	-1.08826	4.48136	61.4886	4.45323e-15	9.87243e-14
ENSG00000113580	NR3C1	nuclear receptor subfamily 3, group C, member 1 (glucocorticoid receptor) [Source:HGNC Symbol;Acc:7978]	-0.752417	4.99501	61.4708	4.49355e-15	9.94692e-14
ENSG00000138433	CIR1	corepressor interacting with RBPJ, 1 [Source:HGNC Symbol;Acc:24217]	-0.785564	5.0478	61.465	4.50694e-15	9.96167e-14
ENSG00000029993	HMGB3	high mobility group box 3 [Source:HGNC Symbol;Acc:5004]	-0.487928	7.63294	61.4206	4.60971e-15	1.01736e-13
ENSG00000182004	SNRPE	small nuclear ribonucleoprotein polypeptide E [Source:HGNC Symbol;Acc:11161]	-0.513227	7.37629	61.3783	4.70969e-15	1.03788e-13
ENSG00000161970	RPL26	ribosomal protein L26 [Source:HGNC Symbol;Acc:10327]	0.40422	9.68512	61.2629	4.99397e-15	1.09798e-13
ENSG00000066926	FECH	ferrochelatase [Source:HGNC Symbol;Acc:3647]	-0.722769	5.42153	61.2616	4.99723e-15	1.09798e-13
ENSG00000134107	BHLHE40	basic helix-loop-helix family, member e40 [Source:HGNC Symbol;Acc:1046]	4.22597	-0.134249	61.2011	5.15328e-15	1.13059e-13
ENSG00000064655	EYA2	eyes absent homolog 2 (Drosophila) [Source:HGNC Symbol;Acc:3520]	0.634277	5.81355	61.0888	5.45587e-15	1.19521e-13
ENSG00000100316	RPL3	ribosomal protein L3 [Source:HGNC Symbol;Acc:10332]	0.445707	10.3907	61.0636	5.52594e-15	1.20877e-13
ENSG00000166619	BLCAP	bladder cancer associated protein [Source:HGNC Symbol;Acc:1055]	-0.564291	6.54461	61.0069	5.68753e-15	1.24228e-13
ENSG00000114270	COL7A1	collagen, type VII, alpha 1 [Source:HGNC Symbol;Acc:2214]	2.24849	1.65024	60.9642	5.8123e-15	1.26766e-13
ENSG00000170852	KBTBD2	kelch repeat and BTB (POZ) domain containing 2 [Source:HGNC Symbol;Acc:21751]	-0.558664	6.29768	60.7617	6.44195e-15	1.40293e-13
ENSG00000089248	ERP29	endoplasmic reticulum protein 29 [Source:HGNC Symbol;Acc:13799]	0.567399	6.45919	60.7396	6.51459e-15	1.41666e-13
ENSG00000166441	RPL27A	ribosomal protein L27a [Source:HGNC Symbol;Acc:10329]	0.462324	8.70274	60.7084	6.6186e-15	1.43717e-13
ENSG00000071564	TCF3	transcription factor 3 (E2A immunoglobulin enhancer binding factors E12/E47) [Source:HGNC Symbol;Acc:11633]	0.609993	7.80752	60.6855	6.69615e-15	1.45188e-13
ENSG00000006071	ABCC8	ATP-binding cassette, sub-family C (CFTR/MRP), member 8 [Source:HGNC Symbol;Acc:59]	-1.12102	3.29913	60.6603	6.78229e-15	1.46841e-13
ENSG00000160716	CHRNB2	cholinergic receptor, nicotinic, beta 2 (neuronal) [Source:HGNC Symbol;Acc:1962]	0.626163	6.60034	60.5216	7.27769e-15	1.57336e-13
ENSG00000152795	HNRPDL	heterogeneous nuclear ribonucleoprotein D-like [Source:HGNC Symbol;Acc:5037]	-0.468856	9.64944	60.43	7.62416e-15	1.64586e-13
ENSG00000091137	SLC26A4	solute carrier family 26, member 4 [Source:HGNC Symbol;Acc:8818]	-2.20197	0.867667	60.3802	7.81964e-15	1.6856e-13
ENSG00000138439	FAM117B	family with sequence similarity 117, member B [Source:HGNC Symbol;Acc:14440]	-0.720758	5.48982	60.342	7.97275e-15	1.71611e-13
ENSG00000150457	LATS2	LATS, large tumor suppressor, homolog 2 (Drosophila) [Source:HGNC Symbol;Acc:6515]	-1.23543	3.63426	60.2498	8.35523e-15	1.79583e-13
ENSG00000197989	SNHG12	small nucleolar RNA host gene 12 (non-protein coding) [Source:HGNC Symbol;Acc:30062]	0.735935	5.16333	60.1877	8.62308e-15	1.85071e-13
ENSG00000152092	ASTN1	astrotactin 1 [Source:HGNC Symbol;Acc:773]	1.90247	1.93041	60.1253	8.90087e-15	1.90757e-13
ENSG00000116209	TMEM59	transmembrane protein 59 [Source:HGNC Symbol;Acc:1239]	-0.493603	7.39384	60.077	9.12165e-15	1.95206e-13
ENSG00000241279	-	A)	-0.621171	6.18823	59.9116	9.92139e-15	2.12014e-13
ENSG00000183873	SCN5A	sodium channel, voltage-gated, type V, alpha subunit [Source:HGNC Symbol;Acc:10593]	1.51842	2.60938	59.9019	9.9703e-15	2.12752e-13
ENSG00000109861	CTSC	cathepsin C [Source:HGNC Symbol;Acc:2528]	0.456271	7.8989	59.8133	1.04296e-14	2.22234e-13
ENSG00000116670	MAD2L2	MAD2 mitotic arrest deficient-like 2 (yeast) [Source:HGNC Symbol;Acc:6764]	-0.911125	4.54635	59.8096	1.04493e-14	2.22334e-13
ENSG00000106049	HIBADH	3-hydroxyisobutyrate dehydrogenase [Source:HGNC Symbol;Acc:4907]	-0.863017	4.4724	59.7949	1.05275e-14	2.23676e-13
ENSG00000155760	FZD7	frizzled family receptor 7 [Source:HGNC Symbol;Acc:4045]	-1.4925	2.24599	59.7341	1.0858e-14	2.30368e-13
ENSG00000140181	HERC2P2	hect domain and RLD 2 pseudogene 2 [Source:HGNC Symbol;Acc:4870]	0.769818	5.24517	59.722	1.0925e-14	2.31457e-13
ENSG00000065911	MTHFD2	methylenetetrahydrofolate dehydrogenase (NADP+ dependent) 2, methenyltetrahydrofolate cyclohydrolase [Source:HGNC Symbol;Acc:7434]	0.431749	8.81335	59.6863	1.11249e-14	2.35355e-13
ENSG00000185088	RPS27L	ribosomal protein S27-like [Source:HGNC Symbol;Acc:18476]	-0.483475	7.531	59.6595	1.12775e-14	2.38243e-13
ENSG00000172594	SMPDL3A	sphingomyelin phosphodiesterase, acid-like 3A [Source:HGNC Symbol;Acc:17389]	-1.28718	3.20636	59.5014	1.22205e-14	2.57796e-13
ENSG00000145555	MYO10	myosin X [Source:HGNC Symbol;Acc:7593]	0.696753	5.33211	59.4697	1.24192e-14	2.61615e-13
ENSG00000243884	-	A)	-0.90791	4.82335	59.3372	1.32838e-14	2.79432e-13
ENSG00000110172	CHORDC1	cysteine and histidine-rich domain (CHORD) containing 1 [Source:HGNC Symbol;Acc:14525]	0.689726	7.31525	58.953	1.61484e-14	3.39208e-13
ENSG00000177954	RPS27	ribosomal protein S27 [Source:HGNC Symbol;Acc:10416]	0.406851	10.5065	58.917	1.64464e-14	3.44979e-13
ENSG00000123240	OPTN	optineurin [Source:HGNC Symbol;Acc:17142]	-1.21648	3.1977	58.772	1.77042e-14	3.70836e-13
ENSG00000154511	FAM69A	family with sequence similarity 69, member A [Source:HGNC Symbol;Acc:32213]	-0.660372	5.90068	58.5431	1.98889e-14	4.16011e-13
ENSG00000070495	JMJD6	jumonji domain containing 6 [Source:HGNC Symbol;Acc:19355]	0.690098	6.28095	58.4274	2.10931e-14	4.40574e-13
ENSG00000157216	SSBP3	single stranded DNA binding protein 3 [Source:HGNC Symbol;Acc:15674]	-0.514876	6.80682	58.25	2.30831e-14	4.81462e-13
ENSG00000106537	TSPAN13	tetraspanin 13 [Source:HGNC Symbol;Acc:21643]	0.735697	5.13127	58.194	2.37503e-14	4.94681e-13
ENSG00000157107	FCHO2	FCH domain only 2 [Source:HGNC Symbol;Acc:25180]	-0.75867	5.2298	58.1274	2.45678e-14	5.1099e-13
ENSG00000198805	PNP	purine nucleoside phosphorylase [Source:HGNC Symbol;Acc:7892]	0.731121	5.29379	58.0159	2.60005e-14	5.4003e-13
ENSG00000163827	LRRC2	leucine rich repeat containing 2 [Source:HGNC Symbol;Acc:14676]	-1.09522	3.38648	57.9342	2.71039e-14	5.62159e-13
ENSG00000004864	SLC25A13	solute carrier family 25 (aspartate/glutamate carrier), member 13 [Source:HGNC Symbol;Acc:10983]	-0.607003	6.05677	57.9256	2.7222e-14	5.6382e-13
ENSG00000023697	DERA	deoxyribose-phosphate aldolase (putative) [Source:HGNC Symbol;Acc:24269]	-0.817325	4.45466	57.7246	3.0151e-14	6.23611e-13
ENSG00000132142	ACACA	acetyl-CoA carboxylase alpha [Source:HGNC Symbol;Acc:84]	0.470186	7.58157	57.7009	3.05159e-14	6.30279e-13
ENSG00000018236	CNTN1	contactin 1 [Source:HGNC Symbol;Acc:2171]	-0.78356	4.8264	57.4574	3.45385e-14	7.12369e-13
ENSG00000132003	ZSWIM4	zinc finger, SWIM-type containing 4 [Source:HGNC Symbol;Acc:25704]	-1.37714	2.96534	57.3839	3.58525e-14	7.38441e-13
ENSG00000103657	HERC1	HECT and RLD domain containing E3 ubiquitin protein ligase family member 1 [Source:HGNC Symbol;Acc:4867]	-0.464587	7.60439	57.3565	3.63563e-14	7.47778e-13
ENSG00000136492	BRIP1	BRCA1 interacting protein C-terminal helicase 1 [Source:HGNC Symbol;Acc:20473]	-0.541385	6.98457	57.3285	3.68778e-14	7.57452e-13
ENSG00000110700	RPS13	ribosomal protein S13 [Source:HGNC Symbol;Acc:10386]	0.415663	9.05077	57.3252	3.69397e-14	7.57672e-13
ENSG00000156515	HK1	hexokinase 1 [Source:HGNC Symbol;Acc:4922]	-0.573533	6.4815	57.13	4.07944e-14	8.3558e-13
ENSG00000143341	HMCN1	hemicentin 1 [Source:HGNC Symbol;Acc:19194]	0.812818	4.62354	57.0979	4.1465e-14	8.48142e-13
ENSG00000197081	IGF2R	insulin-like growth factor 2 receptor [Source:HGNC Symbol;Acc:5467]	0.471238	7.99266	57.0627	4.22138e-14	8.62267e-13
ENSG00000183255	PTTG1IP	pituitary tumor-transforming 1 interacting protein [Source:HGNC Symbol;Acc:13524]	-0.449364	7.87667	57.04	4.27037e-14	8.71074e-13
ENSG00000111249	CUX2	cut-like homeobox 2 [Source:HGNC Symbol;Acc:19347]	-1.33844	2.24726	57.0006	4.35686e-14	8.87494e-13
ENSG00000133863	TEX15	testis expressed 15 [Source:HGNC Symbol;Acc:11738]	0.518356	6.42207	56.9756	4.41254e-14	8.97601e-13
ENSG00000141753	IGFBP4	insulin-like growth factor binding protein 4 [Source:HGNC Symbol;Acc:5473]	0.66514	5.67892	56.9699	4.42543e-14	8.98987e-13
ENSG00000143847	PPFIA4	protein tyrosine phosphatase, receptor type, f polypeptide (PTPRF), interacting protein (liprin), alpha 4 [Source:HGNC Symbol;Acc:9248]	0.991809	3.66302	56.9396	4.49401e-14	9.11669e-13
ENSG00000005882	PDK2	pyruvate dehydrogenase kinase, isozyme 2 [Source:HGNC Symbol;Acc:8810]	-1.32003	3.33991	56.9021	4.58058e-14	9.27959e-13
ENSG00000067082	KLF6	Kruppel-like factor 6 [Source:HGNC Symbol;Acc:2235]	-0.650022	5.85137	56.8558	4.68978e-14	9.48784e-13
ENSG00000198873	GRK5	G protein-coupled receptor kinase 5 [Source:HGNC Symbol;Acc:4544]	1.11304	3.96801	56.8506	4.70218e-14	9.49994e-13
ENSG00000081059	TCF7	transcription factor 7 (T-cell specific, HMG-box) [Source:HGNC Symbol;Acc:11639]	1.00101	3.43095	56.8465	4.71192e-14	9.50666e-13
ENSG00000127124	HIVEP3	human immunodeficiency virus type I enhancer binding protein 3 [Source:HGNC Symbol;Acc:13561]	-1.37188	3.3553	56.6417	5.22921e-14	1.0536e-12
ENSG00000232856	hsa-mir-3654	hsa-mir-3654 [Source:miRBase;Acc:MI0016054]	0.618215	5.87658	56.6346	5.24795e-14	1.05485e-12
ENSG00000177058	SLC38A9	solute carrier family 38, member 9 [Source:HGNC Symbol;Acc:26907]	-0.766562	4.92857	56.634	5.24968e-14	1.05485e-12
ENSG00000134532	SOX5	SRY (sex determining region Y)-box 5 [Source:HGNC Symbol;Acc:11201]	0.958345	4.0728	56.6094	5.31581e-14	1.06669e-12
ENSG00000008988	RPS20	ribosomal protein S20 [Source:HGNC Symbol;Acc:10405]	0.401381	9.19961	56.584	5.38475e-14	1.07906e-12
ENSG00000165533	TTC8	tetratricopeptide repeat domain 8 [Source:HGNC Symbol;Acc:20087]	-0.677943	5.76289	56.5767	5.40478e-14	1.08161e-12
ENSG00000140743	CDR2	cerebellar degeneration-related protein 2, 62kDa [Source:HGNC Symbol;Acc:1799]	0.73409	5.15037	56.5144	5.57893e-14	1.11496e-12
ENSG00000224631	RP11-51O6.1		0.46626	7.18253	56.4911	5.64539e-14	1.12672e-12
ENSG00000215397	SCRT2	scratch homolog 2, zinc finger protein (Drosophila) [Source:HGNC Symbol;Acc:15952]	1.80863	2.03776	56.4565	5.74559e-14	1.14403e-12
ENSG00000146733	PSPH	phosphoserine phosphatase [Source:HGNC Symbol;Acc:9577]	0.708626	5.2794	56.4558	5.74758e-14	1.14403e-12
ENSG00000149925	ALDOA	aldolase A, fructose-bisphosphate [Source:HGNC Symbol;Acc:414]	0.585259	8.4812	56.3217	6.15337e-14	1.22316e-12
ENSG00000007384	RHBDF1	rhomboid 5 homolog 1 (Drosophila) [Source:HGNC Symbol;Acc:20561]	-1.80251	1.93329	56.3013	6.21742e-14	1.23423e-12
ENSG00000012048	BRCA1	breast cancer 1, early onset [Source:HGNC Symbol;Acc:1100]	-0.450643	7.67064	56.2305	6.4453e-14	1.27776e-12
ENSG00000235823	LINC00263	long intergenic non-protein coding RNA 263 [Source:HGNC Symbol;Acc:28060]	1.2974	2.83328	56.078	6.96532e-14	1.379e-12
ENSG00000186591	UBE2H	ubiquitin-conjugating enzyme E2H [Source:HGNC Symbol;Acc:12484]	-0.518417	6.60724	56.0486	7.07025e-14	1.39791e-12
ENSG00000116106	EPHA4	EPH receptor A4 [Source:HGNC Symbol;Acc:3388]	1.37339	3.47427	56.0326	7.1279e-14	1.40743e-12
ENSG00000076604	TRAF4	TNF receptor-associated factor 4 [Source:HGNC Symbol;Acc:12034]	0.605113	6.40281	56.0287	7.14195e-14	1.40832e-12
ENSG00000184384	MAML2	mastermind-like 2 (Drosophila) [Source:HGNC Symbol;Acc:16259]	1.24531	2.74815	55.9054	7.60431e-14	1.4975e-12
ENSG00000162688	AGL	amylo-alpha-1, 6-glucosidase, 4-alpha-glucanotransferase [Source:HGNC Symbol;Acc:321]	-0.522665	6.81893	55.8966	7.63841e-14	1.50222e-12
ENSG00000077238	IL4R	interleukin 4 receptor [Source:HGNC Symbol;Acc:6015]	-1.44685	2.23162	55.8937	7.6499e-14	1.50248e-12
ENSG00000258913	RP11-260M19.2		-2.11241	0.896706	55.837	7.87364e-14	1.54438e-12
ENSG00000166887	VPS39	vacuolar protein sorting 39 homolog (S. cerevisiae) [Source:HGNC Symbol;Acc:20593]	-0.566337	6.2275	55.7707	8.14352e-14	1.5952e-12
ENSG00000165359	DDX26B	DEAD/H (Asp-Glu-Ala-Asp/His) box polypeptide 26B [Source:HGNC Symbol;Acc:27334]	0.564169	6.06052	55.7108	8.39549e-14	1.64239e-12
ENSG00000198890	PRMT6	protein arginine methyltransferase 6 [Source:HGNC Symbol;Acc:18241]	-0.584612	6.17857	55.6524	8.64865e-14	1.68968e-12
ENSG00000172461	FUT9	fucosyltransferase 9 (alpha (1,3) fucosyltransferase) [Source:HGNC Symbol;Acc:4020]	1.29459	2.85043	55.6484	8.66625e-14	1.69089e-12
ENSG00000121851	POLR3GL	polymerase (RNA) III (DNA directed) polypeptide G (32kD)-like [Source:HGNC Symbol;Acc:28466]	-0.764405	4.70514	55.6278	8.75785e-14	1.70651e-12
ENSG00000213553	RPLP0P6	ribosomal protein, large, P0 pseudogene 6 [Source:HGNC Symbol;Acc:36404]	0.695152	5.13557	55.5753	8.99447e-14	1.75032e-12
ENSG00000148680	HTR7	5-hydroxytryptamine (serotonin) receptor 7, adenylate cyclase-coupled [Source:HGNC Symbol;Acc:5302]	-2.04463	1.12497	55.5068	9.31368e-14	1.81006e-12
ENSG00000189079	ARID2	AT rich interactive domain 2 (ARID, RFX-like) [Source:HGNC Symbol;Acc:18037]	-0.513779	6.73026	55.4195	9.73654e-14	1.88976e-12
ENSG00000177822	AC108142.1		1.20116	3.14549	55.3155	1.02656e-13	1.98984e-12
ENSG00000171163	ZNF692	zinc finger protein 692 [Source:HGNC Symbol;Acc:26049]	0.808078	5.3479	55.2528	1.05981e-13	2.05108e-12
ENSG00000171863	RPS7	ribosomal protein S7 [Source:HGNC Symbol;Acc:10440]	0.405185	8.84817	55.2508	1.06093e-13	2.05108e-12
ENSG00000114942	EEF1B2	eukaryotic translation elongation factor 1 beta 2 [Source:HGNC Symbol;Acc:3208]	0.388007	9.16303	55.2363	1.06879e-13	2.06358e-12
ENSG00000164116	GUCY1A3	guanylate cyclase 1, soluble, alpha 3 [Source:HGNC Symbol;Acc:4685]	0.661615	5.46193	55.2206	1.07736e-13	2.07743e-12
ENSG00000163960	UBXN7	UBX domain protein 7 [Source:HGNC Symbol;Acc:29119]	-0.447818	7.61943	55.1745	1.10293e-13	2.12397e-12
ENSG00000196072	BLOC1S2	biogenesis of lysosomal organelles complex-1, subunit 2 [Source:HGNC Symbol;Acc:20984]	-0.582967	6.49584	55.0509	1.17451e-13	2.25888e-12
ENSG00000164916	FOXK1	forkhead box K1 [Source:HGNC Symbol;Acc:23480]	-0.745231	5.68244	54.9975	1.20686e-13	2.31808e-12
ENSG00000176697	BDNF	brain-derived neurotrophic factor [Source:HGNC Symbol;Acc:1033]	1.01172	3.92239	54.9352	1.24571e-13	2.38961e-12
ENSG00000239776	AC079949.1		-0.719039	5.67986	54.8864	1.27699e-13	2.44644e-12
ENSG00000107745	MICU1	mitochondrial calcium uptake 1 [Source:HGNC Symbol;Acc:1530]	-0.616815	5.66351	54.7845	1.34495e-13	2.57069e-12
ENSG00000110841	PPFIBP1	PTPRF interacting protein, binding protein 1 (liprin beta 1) [Source:HGNC Symbol;Acc:9249]	-0.629383	5.76762	54.784	1.34532e-13	2.57069e-12
ENSG00000129521	EGLN3	egl nine homolog 3 (C. elegans) [Source:HGNC Symbol;Acc:14661]	-1.50227	2.254	54.7179	1.39134e-13	2.65357e-12
ENSG00000169071	ROR2	receptor tyrosine kinase-like orphan receptor 2 [Source:HGNC Symbol;Acc:10257]	1.69269	1.76535	54.7166	1.39228e-13	2.65357e-12
ENSG00000185565	LSAMP	limbic system-associated membrane protein [Source:HGNC Symbol;Acc:6705]	-0.953955	4.06399	54.6956	1.40721e-13	2.67859e-12
ENSG00000117289	TXNIP	thioredoxin interacting protein [Source:HGNC Symbol;Acc:16952]	0.712624	5.36966	54.6811	1.41766e-13	2.695e-12
ENSG00000124614	RPS10	ribosomal protein S10 [Source:HGNC Symbol;Acc:10383]	0.432068	8.7597	54.5687	1.50107e-13	2.84991e-12
ENSG00000075426	FOSL2	FOS-like antigen 2 [Source:HGNC Symbol;Acc:3798]	0.928724	3.85966	54.5557	1.51101e-13	2.86511e-12
ENSG00000143157	POGK	pogo transposable element with KRAB domain [Source:HGNC Symbol;Acc:18800]	0.40397	8.48766	54.5433	1.52061e-13	2.87963e-12
ENSG00000156482	RPL30	ribosomal protein L30 [Source:HGNC Symbol;Acc:10333]	0.408755	8.62561	54.461	1.58565e-13	2.99896e-12
ENSG00000111247	RAD51AP1	RAD51 associated protein 1 [Source:HGNC Symbol;Acc:16956]	-0.615487	5.98173	54.325	1.6993e-13	3.20981e-12
ENSG00000163485	ADORA1	adenosine A1 receptor [Source:HGNC Symbol;Acc:262]	1.40004	2.50491	54.2962	1.72439e-13	3.25305e-12
ENSG00000088833	NSFL1C	NSFL1 (p97) cofactor (p47) [Source:HGNC Symbol;Acc:15912]	-0.638994	5.48632	54.2272	1.78595e-13	3.36489e-12
ENSG00000130517	PGPEP1	pyroglutamyl-peptidase I [Source:HGNC Symbol;Acc:13568]	-0.920105	4.3148	54.1725	1.8364e-13	3.45556e-12
ENSG00000197283	SYNGAP1	synaptic Ras GTPase activating protein 1 [Source:HGNC Symbol;Acc:11497]	0.797528	5.5604	54.1438	1.86341e-13	3.50194e-12
ENSG00000174748	RPL15	ribosomal protein L15 [Source:HGNC Symbol;Acc:10306]	0.39815	9.45424	54.057	1.94755e-13	3.65541e-12
ENSG00000096384	HSP90AB1	heat shock protein 90kDa alpha (cytosolic), class B member 1 [Source:HGNC Symbol;Acc:5258]	0.370191	11.2928	54.054	1.95053e-13	3.65638e-12
ENSG00000255717	SNHG1	small nucleolar RNA host gene 1 (non-protein coding) [Source:HGNC Symbol;Acc:32688]	0.439331	7.79971	54.0475	1.957e-13	3.66387e-12
ENSG00000067369	TP53BP1	tumor protein p53 binding protein 1 [Source:HGNC Symbol;Acc:11999]	-0.425821	8.18864	54.0029	2.00196e-13	3.74331e-12
ENSG00000095574	IKZF5	IKAROS family zinc finger 5 (Pegasus) [Source:HGNC Symbol;Acc:14283]	-0.680999	5.23641	53.9357	2.07156e-13	3.86848e-12
ENSG00000108298	RPL19	ribosomal protein L19 [Source:HGNC Symbol;Acc:10312]	0.42347	9.16323	53.9325	2.07497e-13	3.86848e-12
ENSG00000099204	ABLIM1	actin binding LIM protein 1 [Source:HGNC Symbol;Acc:78]	0.443393	7.29938	53.9308	2.07674e-13	3.86848e-12
ENSG00000122547	EEPD1	endonuclease/exonuclease/phosphatase family domain containing 1 [Source:HGNC Symbol;Acc:22223]	0.906617	4.3041	53.8193	2.19807e-13	4.08934e-12
ENSG00000001084	GCLC	glutamate-cysteine ligase, catalytic subunit [Source:HGNC Symbol;Acc:4311]	-0.530211	6.29275	53.6761	2.36428e-13	4.39305e-12
ENSG00000145808	ADAMTS19	ADAM metallopeptidase with thrombospondin type 1 motif, 19 [Source:HGNC Symbol;Acc:17111]	0.767146	4.63041	53.5691	2.49656e-13	4.63302e-12
ENSG00000171551	ECEL1	endothelin converting enzyme-like 1 [Source:HGNC Symbol;Acc:3147]	2.09353	1.21583	53.5332	2.54254e-13	4.71245e-12
ENSG00000129691	ASH2L	ash2 (absent, small, or homeotic)-like (Drosophila) [Source:HGNC Symbol;Acc:744]	-0.581112	6.05478	53.5232	2.55559e-13	4.73071e-12
ENSG00000182628	SKA2	spindle and kinetochore associated complex subunit 2 [Source:HGNC Symbol;Acc:28006]	-0.480328	7.94174	53.4235	2.68858e-13	4.97069e-12
ENSG00000167460	TPM4	tropomyosin 4 [Source:HGNC Symbol;Acc:12013]	-0.422447	8.07087	53.3951	2.72778e-13	5.03686e-12
ENSG00000065534	MYLK	myosin light chain kinase [Source:HGNC Symbol;Acc:7590]	-0.896101	3.83634	53.3531	2.78675e-13	5.13936e-12
ENSG00000110436	SLC1A2	solute carrier family 1 (glial high affinity glutamate transporter), member 2 [Source:HGNC Symbol;Acc:10940]	0.832977	4.24952	53.3341	2.8138e-13	5.18279e-12
ENSG00000239887	C1orf226	chromosome 1 open reading frame 226 [Source:HGNC Symbol;Acc:34351]	2.10605	1.12264	53.2916	2.8753e-13	5.28948e-12
ENSG00000198786	MT-ND5	mitochondrially encoded NADH dehydrogenase 5 [Source:HGNC Symbol;Acc:7461]	0.34263	11.2809	53.268	2.91007e-13	5.34681e-12
ENSG00000233016	SNHG7	small nucleolar RNA host gene 7 (non-protein coding) [Source:HGNC Symbol;Acc:28254]	0.692468	5.36028	53.1514	3.08799e-13	5.66668e-12
ENSG00000130227	XPO7	exportin 7 [Source:HGNC Symbol;Acc:14108]	-0.432736	7.76358	53.1151	3.14558e-13	5.76522e-12
ENSG00000187714	SLC18A3	solute carrier family 18 (vesicular acetylcholine), member 3 [Source:HGNC Symbol;Acc:10936]	-1.9669	1.32913	53.1004	3.16933e-13	5.80156e-12
ENSG00000170734	POLH	polymerase (DNA directed), eta [Source:HGNC Symbol;Acc:9181]	0.707189	5.52754	53.0479	3.25521e-13	5.95141e-12
ENSG00000038427	VCAN	versican [Source:HGNC Symbol;Acc:2464]	0.439955	7.41769	53.0323	3.28115e-13	5.98575e-12
ENSG00000198695	MT-ND6	mitochondrially encoded NADH dehydrogenase 6 [Source:HGNC Symbol;Acc:7462]	0.409792	9.6034	53.0297	3.2855e-13	5.98575e-12
ENSG00000231500	RPS18	ribosomal protein S18 [Source:HGNC Symbol;Acc:10401]	0.383128	10.2899	53.0293	3.28612e-13	5.98575e-12
ENSG00000155966	AFF2	AF4/FMR2 family, member 2 [Source:HGNC Symbol;Acc:3776]	0.708675	4.97339	52.9783	3.37258e-13	6.1357e-12
ENSG00000083312	TNPO1	transportin 1 [Source:HGNC Symbol;Acc:6401]	0.394392	9.67272	52.9121	3.48808e-13	6.33803e-12
ENSG00000108578	BLMH	bleomycin hydrolase [Source:HGNC Symbol;Acc:1059]	-0.435964	7.73016	52.8197	3.65614e-13	6.63527e-12
ENSG00000223705	NSUN5P1	NOP2/Sun domain family, member 5 pseudogene 1 [Source:HGNC Symbol;Acc:19146]	0.780317	4.81122	52.8074	3.67917e-13	6.66889e-12
ENSG00000135968	GCC2	GRIP and coiled-coil domain containing 2 [Source:HGNC Symbol;Acc:23218]	-0.508074	6.64388	52.7797	3.73138e-13	6.75526e-12
ENSG00000260432	RP11-297M9.2		3.36191	-0.686605	52.7063	3.87354e-13	7.00405e-12
ENSG00000148303	RPL7A	ribosomal protein L7a [Source:HGNC Symbol;Acc:10364]	0.410073	9.76378	52.6738	3.93818e-13	7.11225e-12
ENSG00000169439	SDC2	syndecan 2 [Source:HGNC Symbol;Acc:10659]	-0.530027	6.39921	52.592	4.10558e-13	7.40555e-12
ENSG00000119878	CRIPT	cysteine-rich PDZ-binding protein [Source:HGNC Symbol;Acc:14312]	-0.850999	4.28407	52.4477	4.4187e-13	7.96065e-12
ENSG00000067715	SYT1	synaptotagmin I [Source:HGNC Symbol;Acc:11509]	-0.420331	8.29445	52.3457	4.65424e-13	8.3748e-12
ENSG00000144713	RPL32	ribosomal protein L32 [Source:HGNC Symbol;Acc:10336]	0.393767	9.48865	52.3246	4.70442e-13	8.45483e-12
ENSG00000176124	DLEU1	deleted in lymphocytic leukemia 1 (non-protein coding) [Source:HGNC Symbol;Acc:13747]	0.928223	3.81463	52.2475	4.89291e-13	8.78292e-12
ENSG00000205246	RPSAP58	ribosomal protein SA pseudogene 58 [Source:HGNC Symbol;Acc:36809]	0.555209	6.02825	52.2107	4.98546e-13	8.93822e-12
ENSG00000179627	ZBTB42	zinc finger and BTB domain containing 42 [Source:HGNC Symbol;Acc:32550]	-1.7552	1.42428	52.1772	5.07128e-13	9.08108e-12
ENSG00000072274	TFRC	transferrin receptor (p90, CD71) [Source:HGNC Symbol;Acc:11763]	0.402494	9.59842	52.1526	5.13512e-13	9.18429e-12
ENSG00000182319	PRAGMIN	Tyrosine-protein kinase SgK223 [Source:UniProtKB/Swiss-Prot;Acc:Q86YV5]	-0.976167	4.20581	52.1217	5.21652e-13	9.31863e-12
ENSG00000137203	TFAP2A	transcription factor AP-2 alpha (activating enhancer binding protein 2 alpha) [Source:HGNC Symbol;Acc:11742]	0.784694	4.52629	52.0974	5.28148e-13	9.42331e-12
ENSG00000151883	PARP8	poly (ADP-ribose) polymerase family, member 8 [Source:HGNC Symbol;Acc:26124]	1.18702	3.18009	52.0649	5.36959e-13	9.56899e-12
ENSG00000086666	ZFAND6	zinc finger, AN1-type domain 6 [Source:HGNC Symbol;Acc:30164]	-0.476495	7.24829	51.9352	5.73638e-13	1.02103e-11
ENSG00000109458	GAB1	GRB2-associated binding protein 1 [Source:HGNC Symbol;Acc:4066]	-0.618722	5.50549	51.831	6.04902e-13	1.07539e-11
ENSG00000106025	TSPAN12	tetraspanin 12 [Source:HGNC Symbol;Acc:21641]	1.20065	2.95646	51.7879	6.18321e-13	1.09793e-11
ENSG00000174804	FZD4	frizzled family receptor 4 [Source:HGNC Symbol;Acc:4042]	-0.796303	4.32454	51.7212	6.39694e-13	1.13452e-11
ENSG00000254602	AP000662.4		-1.08287	3.18372	51.6178	6.74271e-13	1.19441e-11
ENSG00000164754	RAD21	RAD21 homolog (S. pombe) [Source:HGNC Symbol;Acc:9811]	-0.402372	8.89096	51.5979	6.8113e-13	1.20512e-11
ENSG00000082556	OPRK1	opioid receptor, kappa 1 [Source:HGNC Symbol;Acc:8154]	-1.8938	1.37508	51.524	7.07274e-13	1.24988e-11
ENSG00000168675	C18orf1	chromosome 18 open reading frame 1 [Source:HGNC Symbol;Acc:1224]	-0.957615	3.53158	51.4543	7.32821e-13	1.29349e-11
ENSG00000113763	UNC5A	unc-5 homolog A (C. elegans) [Source:HGNC Symbol;Acc:12567]	-1.06785	3.52347	51.4506	7.34209e-13	1.29439e-11
ENSG00000117500	TMED5	transmembrane emp24 protein transport domain containing 5 [Source:HGNC Symbol;Acc:24251]	0.489754	7.72065	51.4378	7.39021e-13	1.30133e-11
ENSG00000110090	CPT1A	carnitine palmitoyltransferase 1A (liver) [Source:HGNC Symbol;Acc:2328]	-0.604836	5.61081	51.2492	8.13522e-13	1.43081e-11
ENSG00000168438	CDC40	cell division cycle 40 homolog (S. cerevisiae) [Source:HGNC Symbol;Acc:17350]	-0.527348	6.29491	51.1494	8.55961e-13	1.50367e-11
ENSG00000147403	RPL10	ribosomal protein L10 [Source:HGNC Symbol;Acc:10298]	0.432825	9.20538	51.143	8.58772e-13	1.50682e-11
ENSG00000131724	IL13RA1	interleukin 13 receptor, alpha 1 [Source:HGNC Symbol;Acc:5974]	-0.99147	3.75475	51.1135	8.71764e-13	1.5278e-11
ENSG00000135622	SEMA4F	sema domain, immunoglobulin domain (Ig), transmembrane domain (TM) and short cytoplasmic domain, (semaphorin) 4F [Source:HGNC Symbol;Acc:10734]	-0.849179	4.5113	51.094	8.80491e-13	1.54128e-11
ENSG00000153157	SYCP2L	synaptonemal complex protein 2-like [Source:HGNC Symbol;Acc:21537]	-0.916234	3.90671	51.0176	9.15425e-13	1.60054e-11
ENSG00000206195	AP000525.8		-0.639667	5.54921	50.9641	9.40687e-13	1.64276e-11
ENSG00000182134	TDRKH	tudor and KH domain containing [Source:HGNC Symbol;Acc:11713]	-0.668034	5.43504	50.9568	9.44205e-13	1.64697e-11
ENSG00000198189	HSD17B11	hydroxysteroid (17-beta) dehydrogenase 11 [Source:HGNC Symbol;Acc:22960]	-0.853772	4.20989	50.9369	9.53831e-13	1.6618e-11
ENSG00000160097	FNDC5	fibronectin type III domain containing 5 [Source:HGNC Symbol;Acc:20240]	-0.44232	7.26085	50.8365	1.00387e-12	1.74693e-11
ENSG00000178429	RPS3AP5	ribosomal protein S3A pseudogene 5 [Source:HGNC Symbol;Acc:23744]	0.527716	6.36104	50.7471	1.0507e-12	1.82627e-11
ENSG00000156925	ZIC3	Zic family member 3 [Source:HGNC Symbol;Acc:12874]	-0.461305	6.82472	50.5829	1.14235e-12	1.98325e-11
ENSG00000114698	PLSCR4	phospholipid scramblase 4 [Source:HGNC Symbol;Acc:16497]	-1.50463	1.64108	50.5367	1.16958e-12	2.02681e-11
ENSG00000163702	IL17RC	interleukin 17 receptor C [Source:HGNC Symbol;Acc:18358]	-1.34959	2.24221	50.5357	1.17018e-12	2.02681e-11
ENSG00000140368	PSTPIP1	proline-serine-threonine phosphatase interacting protein 1 [Source:HGNC Symbol;Acc:9580]	-1.85224	1.27046	50.5031	1.18977e-12	2.05833e-11
ENSG00000134324	LPIN1	lipin 1 [Source:HGNC Symbol;Acc:13345]	-0.556402	6.04505	50.4471	1.22418e-12	2.11538e-11
ENSG00000127022	CANX	calnexin [Source:HGNC Symbol;Acc:1473]	0.352193	10.1233	50.388	1.26166e-12	2.17761e-11
ENSG00000162004	CCDC78	coiled-coil domain containing 78 [Source:HGNC Symbol;Acc:14153]	1.86094	1.59191	50.3818	1.26561e-12	2.18189e-11
ENSG00000123106	CCDC91	coiled-coil domain containing 91 [Source:HGNC Symbol;Acc:24855]	-0.743958	5.03821	50.3724	1.2717e-12	2.18983e-11
ENSG00000052802	MSMO1	methylsterol monooxygenase 1 [Source:HGNC Symbol;Acc:10545]	0.539484	6.65046	50.2318	1.36619e-12	2.34982e-11
ENSG00000183405	RPS7P1	ribosomal protein S7 pseudogene 1 [Source:HGNC Symbol;Acc:17081]	0.546323	6.09764	50.2167	1.37672e-12	2.36518e-11
ENSG00000100418	DESI1	desumoylating isopeptidase 1 [Source:HGNC Symbol;Acc:24577]	0.574335	5.97976	50.0861	1.47145e-12	2.52499e-11
ENSG00000230067	HSPD1P6	heat shock 60kDa protein 1 (chaperonin) pseudogene 6 [Source:HGNC Symbol;Acc:5267]	-1.67916	1.35173	50.0086	1.53076e-12	2.62373e-11
ENSG00000141140	MYO19	myosin XIX [Source:HGNC Symbol;Acc:26234]	0.600256	5.95001	49.8415	1.66679e-12	2.85359e-11
ENSG00000120088	CRHR1	corticotropin releasing hormone receptor 1 [Source:HGNC Symbol;Acc:2357]	-1.35809	2.04359	49.8354	1.67201e-12	2.85922e-11
ENSG00000116171	SCP2	sterol carrier protein 2 [Source:HGNC Symbol;Acc:10606]	-0.462571	7.16318	49.7819	1.71819e-12	2.9348e-11
ENSG00000231721	AC058791.2		-1.32779	2.51398	49.7755	1.7238e-12	2.94098e-11
ENSG00000162849	KIF26B	kinesin family member 26B [Source:HGNC Symbol;Acc:25484]	0.817615	4.56415	49.6173	1.86858e-12	3.18433e-11
ENSG00000131373	HACL1	2-hydroxyacyl-CoA lyase 1 [Source:HGNC Symbol;Acc:17856]	-0.937843	3.64821	49.6015	1.88367e-12	3.20636e-11
ENSG00000101972	STAG2	stromal antigen 2 [Source:HGNC Symbol;Acc:11355]	-0.428888	7.74251	49.551	1.93283e-12	3.28625e-11
ENSG00000085832	EPS15	epidermal growth factor receptor pathway substrate 15 [Source:HGNC Symbol;Acc:3419]	-0.507014	6.67804	49.5079	1.97574e-12	3.35536e-11
ENSG00000074410	CA12	carbonic anhydrase XII [Source:HGNC Symbol;Acc:1371]	-0.880032	4.31159	49.4349	2.0506e-12	3.4785e-11
ENSG00000129534	MIS18BP1	MIS18 binding protein 1 [Source:HGNC Symbol;Acc:20190]	-0.518013	6.28409	49.3011	2.19535e-12	3.71979e-11
ENSG00000104356	POP1	processing of precursor 1, ribonuclease P/MRP subunit (S. cerevisiae) [Source:HGNC Symbol;Acc:30129]	0.461634	6.74409	49.2772	2.22225e-12	3.76107e-11
ENSG00000095203	EPB41L4B	erythrocyte membrane protein band 4.1 like 4B [Source:HGNC Symbol;Acc:19818]	-1.16683	2.79003	49.261	2.24069e-12	3.78794e-11
ENSG00000159216	RUNX1	runt-related transcription factor 1 [Source:HGNC Symbol;Acc:10471]	1.68534	1.19923	49.2265	2.28054e-12	3.85092e-11
ENSG00000162889	MAPKAPK2	mitogen-activated protein kinase-activated protein kinase 2 [Source:HGNC Symbol;Acc:6887]	-0.608177	5.82996	49.1508	2.3702e-12	3.99775e-11
ENSG00000106868	SUSD1	sushi domain containing 1 [Source:HGNC Symbol;Acc:25413]	0.617861	5.36434	49.0737	2.46527e-12	4.15338e-11
ENSG00000159784	FAM131B	family with sequence similarity 131, member B [Source:HGNC Symbol;Acc:22202]	-1.13028	2.84177	48.9976	2.56272e-12	4.31265e-11
ENSG00000204308	RNF5	ring finger protein 5, E3 ubiquitin protein ligase [Source:HGNC Symbol;Acc:10068]	-0.633301	5.39954	48.8734	2.7303e-12	4.58945e-11
ENSG00000069712	KIAA1107	KIAA1107 [Source:HGNC Symbol;Acc:29192]	-1.85594	1.52336	48.7616	2.89045e-12	4.85314e-11
ENSG00000177606	JUN	jun proto-oncogene [Source:HGNC Symbol;Acc:6204]	0.715042	5.5013	48.7305	2.93668e-12	4.92518e-11
ENSG00000232573	RPL3P4	ribosomal protein L3 pseudogene 4 [Source:HGNC Symbol;Acc:19805]	0.534835	5.97961	48.683	3.00866e-12	5.04018e-11
ENSG00000117569	PTBP2	polypyrimidine tract binding protein 2 [Source:HGNC Symbol;Acc:17662]	-0.550366	7.01289	48.6658	3.03507e-12	5.07868e-11
ENSG00000166946	CCNDBP1	cyclin D-type binding-protein 1 [Source:HGNC Symbol;Acc:1587]	-0.648431	5.45943	48.6456	3.06649e-12	5.12548e-11
ENSG00000162976	PQLC3	PQ loop repeat containing 3 [Source:HGNC Symbol;Acc:28503]	-2.02333	0.621686	48.639	3.07697e-12	5.13718e-11
ENSG00000107643	MAPK8	mitogen-activated protein kinase 8 [Source:HGNC Symbol;Acc:6881]	-0.516748	6.8688	48.57	3.18713e-12	5.31512e-11
ENSG00000112218	GPR63	G protein-coupled receptor 63 [Source:HGNC Symbol;Acc:13302]	0.936201	3.7562	48.5625	3.19926e-12	5.32934e-11
ENSG00000136717	BIN1	bridging integrator 1 [Source:HGNC Symbol;Acc:1052]	-1.01487	4.02258	48.5372	3.24086e-12	5.39257e-11
ENSG00000241482	-	A)	-0.656228	5.53219	48.4727	3.34918e-12	5.56655e-11
ENSG00000120694	HSPH1	heat shock 105kDa/110kDa protein 1 [Source:HGNC Symbol;Acc:16969]	0.523461	9.28616	48.3831	3.50576e-12	5.82027e-11
ENSG00000138316	ADAMTS14	ADAM metallopeptidase with thrombospondin type 1 motif, 14 [Source:HGNC Symbol;Acc:14899]	1.98302	1.16646	48.2735	3.70737e-12	6.14809e-11
ENSG00000108821	COL1A1	collagen, type I, alpha 1 [Source:HGNC Symbol;Acc:2197]	0.916005	5.20488	48.2598	3.73319e-12	6.18398e-11
ENSG00000171262	FAM98B	family with sequence similarity 98, member B [Source:HGNC Symbol;Acc:26773]	-0.513758	6.9826	48.1099	4.02994e-12	6.66809e-11
ENSG00000092841	MYL6	myosin, light chain 6, alkali, smooth muscle and non-muscle [Source:HGNC Symbol;Acc:7587]	-0.406263	8.17724	48.0783	4.09543e-12	6.76888e-11
ENSG00000171316	CHD7	chromodomain helicase DNA binding protein 7 [Source:HGNC Symbol;Acc:20626]	-0.392539	8.02868	47.9835	4.29832e-12	7.0963e-11
ENSG00000180530	NRIP1	nuclear receptor interacting protein 1 [Source:HGNC Symbol;Acc:8001]	-0.439526	7.76152	47.9318	4.41311e-12	7.27769e-11
ENSG00000148834	GSTO1	glutathione S-transferase omega 1 [Source:HGNC Symbol;Acc:13312]	-0.567555	5.79025	47.8054	4.70688e-12	7.75353e-11
ENSG00000171456	ASXL1	additional sex combs like 1 (Drosophila) [Source:HGNC Symbol;Acc:18318]	-0.490612	6.72684	47.7731	4.78501e-12	7.87347e-11
ENSG00000137575	SDCBP	syndecan binding protein (syntenin) [Source:HGNC Symbol;Acc:10662]	-0.461743	7.15319	47.7348	4.87957e-12	8.02014e-11
ENSG00000179532	DNHD1	dynein heavy chain domain 1 [Source:HGNC Symbol;Acc:26532]	1.07196	3.60449	47.7306	4.88996e-12	8.02832e-11
ENSG00000175115	PACS1	phosphofurin acidic cluster sorting protein 1 [Source:HGNC Symbol;Acc:30032]	-1.11659	3.04709	47.7059	4.95194e-12	8.11735e-11
ENSG00000115297	TLX2	T-cell leukemia homeobox 2 [Source:HGNC Symbol;Acc:5057]	-0.561158	7.38628	47.7046	4.95515e-12	8.11735e-11
ENSG00000051180	RAD51	RAD51 homolog (S. cerevisiae) [Source:HGNC Symbol;Acc:9817]	-0.68451	4.83292	47.7002	4.96641e-12	8.1268e-11
ENSG00000163682	RPL9	ribosomal protein L9 [Source:HGNC Symbol;Acc:10369]	0.361078	9.77477	47.6334	5.13865e-12	8.39936e-11
ENSG00000174437	ATP2A2	ATPase, Ca++ transporting, cardiac muscle, slow twitch 2 [Source:HGNC Symbol;Acc:812]	0.357372	9.20631	47.4405	5.6698e-12	9.25734e-11
ENSG00000151117	TMEM86A	transmembrane protein 86A [Source:HGNC Symbol;Acc:26890]	-1.52289	1.79367	47.3009	6.08831e-12	9.92971e-11
ENSG00000145860	RNF145	ring finger protein 145 [Source:HGNC Symbol;Acc:20853]	0.406658	7.69163	47.2875	6.13022e-12	9.98706e-11
ENSG00000120733	KDM3B	lysine (K)-specific demethylase 3B [Source:HGNC Symbol;Acc:1337]	-0.42623	7.48716	47.2487	6.25261e-12	1.01753e-10
ENSG00000141380	SS18	synovial sarcoma translocation, chromosome 18 [Source:HGNC Symbol;Acc:11340]	-0.432151	7.23076	47.2401	6.28017e-12	1.02089e-10
ENSG00000185008	ROBO2	roundabout, axon guidance receptor, homolog 2 (Drosophila) [Source:HGNC Symbol;Acc:10250]	1.00671	3.09027	47.2342	6.29916e-12	1.02285e-10
ENSG00000150760	DOCK1	dedicator of cytokinesis 1 [Source:HGNC Symbol;Acc:2987]	-0.470545	6.40208	47.1622	6.5348e-12	1.05995e-10
ENSG00000080815	PSEN1	presenilin 1 [Source:HGNC Symbol;Acc:9508]	-0.564775	5.78359	47.1499	6.57595e-12	1.06546e-10
ENSG00000100129	EIF3L	eukaryotic translation initiation factor 3, subunit L [Source:HGNC Symbol;Acc:18138]	0.392409	8.62084	47.147	6.58574e-12	1.06588e-10
ENSG00000210082	J01415.4		-0.313805	11.322	47.1385	6.61442e-12	1.06935e-10
ENSG00000074201	CLNS1A	chloride channel, nucleotide-sensitive, 1A [Source:HGNC Symbol;Acc:2080]	-0.457166	7.32241	47.0986	6.75036e-12	1.09014e-10
ENSG00000168028	RPSA	ribosomal protein SA [Source:HGNC Symbol;Acc:6502]	0.359949	9.76009	47.0308	6.98787e-12	1.12727e-10
ENSG00000143476	DTL	denticleless E3 ubiquitin protein ligase homolog (Drosophila) [Source:HGNC Symbol;Acc:30288]	-0.45445	7.35631	47.015	7.04465e-12	1.13519e-10
ENSG00000136099	PCDH8	protocadherin 8 [Source:HGNC Symbol;Acc:8660]	1.07631	3.05709	46.9764	7.18455e-12	1.15648e-10
ENSG00000091129	NRCAM	neuronal cell adhesion molecule [Source:HGNC Symbol;Acc:7994]	-0.595072	5.4698	46.9646	7.22788e-12	1.16219e-10
ENSG00000110619	CARS	cysteinyl-tRNA synthetase [Source:HGNC Symbol;Acc:1493]	0.538077	6.63836	46.8874	7.51826e-12	1.20757e-10
ENSG00000055483	USP36	ubiquitin specific peptidase 36 [Source:HGNC Symbol;Acc:20062]	0.529028	6.6124	46.8426	7.69229e-12	1.23418e-10
ENSG00000160200	CBS	cystathionine-beta-synthase [Source:HGNC Symbol;Acc:1550]	0.557316	7.97769	46.8078	7.83004e-12	1.25493e-10
ENSG00000139737	SLAIN1	SLAIN motif family, member 1 [Source:HGNC Symbol;Acc:26387]	0.423723	8.02854	46.7772	7.95316e-12	1.27328e-10
ENSG00000169432	SCN9A	sodium channel, voltage-gated, type IX, alpha subunit [Source:HGNC Symbol;Acc:10597]	1.93125	1.35211	46.7736	7.96789e-12	1.27426e-10
ENSG00000163947	ARHGEF3	Rho guanine nucleotide exchange factor (GEF) 3 [Source:HGNC Symbol;Acc:683]	0.890691	3.79932	46.6963	8.28845e-12	1.3241e-10
ENSG00000132912	DCTN4	dynactin 4 (p62) [Source:HGNC Symbol;Acc:15518]	-0.421378	7.84062	46.6865	8.32999e-12	1.3293e-10
ENSG00000082781	ITGB5	integrin, beta 5 [Source:HGNC Symbol;Acc:6160]	-2.08363	1.01594	46.5609	8.88128e-12	1.41575e-10
ENSG00000145832	SLC25A48	solute carrier family 25, member 48 [Source:HGNC Symbol;Acc:30451]	1.33544	2.11505	46.4653	9.32564e-12	1.48498e-10
ENSG00000159352	PSMD4	proteasome (prosome, macropain) 26S subunit, non-ATPase, 4 [Source:HGNC Symbol;Acc:9561]	-0.382404	9.05377	46.4454	9.42081e-12	1.49853e-10
ENSG00000198863	RUNDC1	RUN domain containing 1 [Source:HGNC Symbol;Acc:25418]	0.520756	6.06787	46.3778	9.75136e-12	1.54944e-10
ENSG00000115232	ITGA4	integrin, alpha 4 (antigen CD49D, alpha 4 subunit of VLA-4 receptor) [Source:HGNC Symbol;Acc:6140]	-0.478842	6.49559	46.365	9.81526e-12	1.55792e-10
ENSG00000073910	FRY	furry homolog (Drosophila) [Source:HGNC Symbol;Acc:20367]	-1.14297	2.40928	46.2939	1.01782e-11	1.61381e-10
ENSG00000205213	LGR4	leucine-rich repeat containing G protein-coupled receptor 4 [Source:HGNC Symbol;Acc:13299]	-0.775574	4.27975	46.2125	1.06096e-11	1.6804e-10
ENSG00000067560	RHOA	ras homolog family member A [Source:HGNC Symbol;Acc:667]	-0.377276	8.81683	46.1674	1.0857e-11	1.71774e-10
ENSG00000162923	WDR26	WD repeat domain 26 [Source:HGNC Symbol;Acc:21208]	-0.400999	7.91034	46.0348	1.16173e-11	1.83608e-10
ENSG00000101343	CRNKL1	crooked neck pre-mRNA splicing factor-like 1 (Drosophila) [Source:HGNC Symbol;Acc:15762]	-0.486859	6.2843	46.0049	1.17955e-11	1.86226e-10
ENSG00000158050	DUSP2	dual specificity phosphatase 2 [Source:HGNC Symbol;Acc:3068]	-3.28577	-0.301396	45.9604	1.20668e-11	1.90306e-10
ENSG00000095752	IL11	interleukin 11 [Source:HGNC Symbol;Acc:5966]	-1.55617	1.7187	45.9145	1.23529e-11	1.94611e-10
ENSG00000106829	TLE4	transducin-like enhancer of split 4 (E(sp1) homolog, Drosophila) [Source:HGNC Symbol;Acc:11840]	-0.567033	5.99853	45.8935	1.24859e-11	1.96497e-10
ENSG00000068697	LAPTM4A	lysosomal protein transmembrane 4 alpha [Source:HGNC Symbol;Acc:6924]	-0.430642	7.29887	45.8505	1.27629e-11	2.00643e-10
ENSG00000164128	NPY1R	neuropeptide Y receptor Y1 [Source:HGNC Symbol;Acc:7956]	1.42385	2.03921	45.8226	1.29464e-11	2.03311e-10
ENSG00000169991	IFFO2	intermediate filament family orphan 2 [Source:HGNC Symbol;Acc:27006]	-1.725	1.50605	45.7957	1.31253e-11	2.05903e-10
ENSG00000151834	GABRA2	gamma-aminobutyric acid (GABA) A receptor, alpha 2 [Source:HGNC Symbol;Acc:4076]	1.82291	1.51491	45.779	1.32373e-11	2.07441e-10
ENSG00000132639	SNAP25	synaptosomal-associated protein, 25kDa [Source:HGNC Symbol;Acc:11132]	0.613882	5.38895	45.7659	1.33262e-11	2.08612e-10
ENSG00000229833	PET100	PET100 homolog (S. cerevisiae) [Source:HGNC Symbol;Acc:40038]	-0.861997	4.33183	45.7401	1.35032e-11	2.11161e-10
ENSG00000122545	SEPT7	septin 7 [Source:HGNC Symbol;Acc:1717]	-0.435033	8.09771	45.6925	1.38352e-11	2.16124e-10
ENSG00000116141	MARK1	MAP/microtubule affinity-regulating kinase 1 [Source:HGNC Symbol;Acc:6896]	-0.516026	6.07275	45.6757	1.39542e-11	2.17754e-10
ENSG00000143867	OSR1	odd-skipped related 1 (Drosophila) [Source:HGNC Symbol;Acc:8111]	1.79436	1.20515	45.6192	1.43627e-11	2.23892e-10
ENSG00000168216	LMBRD1	LMBR1 domain containing 1 [Source:HGNC Symbol;Acc:23038]	-0.901922	3.76431	45.6049	1.44677e-11	2.25292e-10
ENSG00000245532	NEAT1	nuclear paraspeckle assembly transcript 1 (non-protein coding) [Source:HGNC Symbol;Acc:30815]	-0.576273	7.31595	45.5943	1.45465e-11	2.26281e-10
ENSG00000180398	MCFD2	multiple coagulation factor deficiency 2 [Source:HGNC Symbol;Acc:18451]	0.420703	7.3509	45.569	1.47355e-11	2.2898e-10
ENSG00000145592	RPL37	ribosomal protein L37 [Source:HGNC Symbol;Acc:10347]	0.354643	9.53662	45.4497	1.56613e-11	2.43111e-10
ENSG00000116574	RHOU	ras homolog family member U [Source:HGNC Symbol;Acc:17794]	0.497741	6.49297	45.4289	1.5828e-11	2.45219e-10
ENSG00000198369	SPRED2	sprouty-related, EVH1 domain containing 2 [Source:HGNC Symbol;Acc:17722]	-0.677016	5.1005	45.4286	1.58302e-11	2.45219e-10
ENSG00000121879	PIK3CA	phosphatidylinositol-4,5-bisphosphate 3-kinase, catalytic subunit alpha [Source:HGNC Symbol;Acc:8975]	-0.587136	5.65137	45.379	1.6237e-11	2.51258e-10
ENSG00000143363	PRUNE	prune homolog (Drosophila) [Source:HGNC Symbol;Acc:13420]	-0.425095	6.96795	45.3664	1.63418e-11	2.52616e-10
ENSG00000160049	DFFA	DNA fragmentation factor, 45kDa, alpha polypeptide [Source:HGNC Symbol;Acc:2772]	0.592161	5.60904	45.1995	1.77948e-11	2.74789e-10
ENSG00000183662	FAM19A1	family with sequence similarity 19 (chemokine (C-C motif)-like), member A1 [Source:HGNC Symbol;Acc:21587]	-1.92327	0.905881	45.1913	1.78698e-11	2.75661e-10
ENSG00000054983	GALC	galactosylceramidase [Source:HGNC Symbol;Acc:4115]	-0.664003	4.95562	44.9538	2.01741e-11	3.10882e-10
ENSG00000126775	ATG14	autophagy related 14 [Source:HGNC Symbol;Acc:19962]	-0.608511	5.41438	44.938	2.03373e-11	3.13071e-10
ENSG00000167771	RCOR2	REST corepressor 2 [Source:HGNC Symbol;Acc:27455]	0.582264	7.09583	44.8946	2.07927e-11	3.1975e-10
ENSG00000095739	BAMBI	BMP and activin membrane-bound inhibitor homolog (Xenopus laevis) [Source:HGNC Symbol;Acc:30251]	-0.88817	4.05232	44.7405	2.24953e-11	3.45574e-10
ENSG00000100297	MCM5	minichromosome maintenance complex component 5 [Source:HGNC Symbol;Acc:6948]	-0.637507	5.99372	44.7239	2.26872e-11	3.4816e-10
ENSG00000116962	NID1	nidogen 1 [Source:HGNC Symbol;Acc:7821]	-0.508123	6.00426	44.7118	2.28283e-11	3.49963e-10
ENSG00000164330	EBF1	early B-cell factor 1 [Source:HGNC Symbol;Acc:3126]	-0.803142	4.15862	44.6914	2.30674e-11	3.53263e-10
ENSG00000174111	SOCS7	suppressor of cytokine signaling 7 [Source:HGNC Symbol;Acc:29846]	0.828148	4.23938	44.6278	2.38281e-11	3.64535e-10
ENSG00000080345	RIF1	RAP1 interacting factor homolog (yeast) [Source:HGNC Symbol;Acc:23207]	-0.395781	7.70423	44.5786	2.44352e-11	3.73182e-10
ENSG00000166398	KIAA0355	KIAA0355 [Source:HGNC Symbol;Acc:29016]	-0.64726	4.98361	44.5779	2.44437e-11	3.73182e-10
ENSG00000229117	RPL41	ribosomal protein L41 [Source:HGNC Symbol;Acc:10354]	0.37534	9.56782	44.5336	2.50027e-11	3.81324e-10
ENSG00000160445	ZER1	zer-1 homolog (C. elegans) [Source:HGNC Symbol;Acc:30960]	-0.818135	4.24983	44.5	2.54361e-11	3.87534e-10
ENSG00000143190	POU2F1	POU class 2 homeobox 1 [Source:HGNC Symbol;Acc:9212]	-0.462604	6.49752	44.4594	2.59686e-11	3.95241e-10
ENSG00000136010	ALDH1L2	aldehyde dehydrogenase 1 family, member L2 [Source:HGNC Symbol;Acc:26777]	0.671421	4.8919	44.4477	2.61244e-11	3.97204e-10
ENSG00000120738	EGR1	early growth response 1 [Source:HGNC Symbol;Acc:3238]	-1.3951	2.31397	44.3943	2.68471e-11	4.07773e-10
ENSG00000069702	TGFBR3	transforming growth factor, beta receptor III [Source:HGNC Symbol;Acc:11774]	-0.938156	3.21541	44.3565	2.737e-11	4.15289e-10
ENSG00000100644	HIF1A	hypoxia inducible factor 1, alpha subunit (basic helix-loop-helix transcription factor) [Source:HGNC Symbol;Acc:4910]	-0.414513	8.6161	44.2479	2.89311e-11	4.38527e-10
ENSG00000189343	RPS2P46	ribosomal protein S2 pseudogene 46 [Source:HGNC Symbol;Acc:35839]	0.72955	4.98887	44.2453	2.89699e-11	4.38666e-10
ENSG00000066557	LRRC40	leucine rich repeat containing 40 [Source:HGNC Symbol;Acc:26004]	-0.438312	7.12062	44.1236	3.08281e-11	4.66326e-10
ENSG00000124795	DEK	DEK oncogene [Source:HGNC Symbol;Acc:2768]	-0.401514	9.01364	44.1048	3.11253e-11	4.70341e-10
ENSG00000060982	BCAT1	branched chain amino-acid transaminase 1, cytosolic [Source:HGNC Symbol;Acc:976]	0.347442	9.2626	44.0948	3.1285e-11	4.72272e-10
ENSG00000179862	CITED4	Cbp/p300-interacting transactivator, with Glu/Asp-rich carboxy-terminal domain, 4 [Source:HGNC Symbol;Acc:18696]	-1.53164	1.76242	44.0533	3.19551e-11	4.81897e-10
ENSG00000133872	TMEM66	transmembrane protein 66 [Source:HGNC Symbol;Acc:28789]	-0.419357	7.12816	44.0501	3.20071e-11	4.8219e-10
ENSG00000132205	EMILIN2	elastin microfibril interfacer 2 [Source:HGNC Symbol;Acc:19881]	-0.734275	4.74128	44.0429	3.21256e-11	4.83483e-10
ENSG00000112306	RPS12	ribosomal protein S12 [Source:HGNC Symbol;Acc:10385]	0.341973	9.2049	43.9966	3.28949e-11	4.9456e-10
ENSG00000041357	PSMA4	proteasome (prosome, macropain) subunit, alpha type, 4 [Source:HGNC Symbol;Acc:9533]	-0.378813	8.85493	43.8979	3.4596e-11	5.19606e-10
ENSG00000150907	FOXO1	forkhead box O1 [Source:HGNC Symbol;Acc:3819]	-1.0813	2.97113	43.8729	3.50404e-11	5.25749e-10
ENSG00000117016	RIMS3	regulating synaptic membrane exocytosis 3 [Source:HGNC Symbol;Acc:21292]	0.472686	6.92196	43.844	3.55616e-11	5.33029e-10
ENSG00000133606	MKRN1	makorin ring finger protein 1 [Source:HGNC Symbol;Acc:7112]	-0.465452	6.52089	43.7774	3.6793e-11	5.50928e-10
ENSG00000168488	ATXN2L	ataxin 2-like [Source:HGNC Symbol;Acc:31326]	0.579924	7.1776	43.6908	3.8457e-11	5.75262e-10
ENSG00000196205	EEF1A1P5	eukaryotic translation elongation factor 1 alpha 1 pseudogene 5 [Source:HGNC Symbol;Acc:3200]	0.604758	5.31381	43.6281	3.97106e-11	5.93415e-10
ENSG00000132386	SERPINF1	serpin peptidase inhibitor, clade F (alpha-2 antiplasmin, pigment epithelium derived factor), member 1 [Source:HGNC Symbol;Acc:8824]	0.510371	6.7762	43.5429	4.14759e-11	6.19171e-10
ENSG00000183779	ZNF703	zinc finger protein 703 [Source:HGNC Symbol;Acc:25883]	0.88172	4.5637	43.52	4.19655e-11	6.25848e-10
ENSG00000157077	ZFYVE9	zinc finger, FYVE domain containing 9 [Source:HGNC Symbol;Acc:6775]	-0.455794	6.46251	43.4698	4.30547e-11	6.41446e-10
ENSG00000117461	PIK3R3	phosphoinositide-3-kinase, regulatory subunit 3 (gamma) [Source:HGNC Symbol;Acc:8981]	0.372015	8.28025	43.4632	4.3201e-11	6.4297e-10
ENSG00000164076	CAMKV	CaM kinase-like vesicle-associated [Source:HGNC Symbol;Acc:28788]	0.470905	6.63711	43.4612	4.32439e-11	6.4297e-10
ENSG00000107130	NCS1	neuronal calcium sensor 1 [Source:HGNC Symbol;Acc:3953]	-0.511616	6.97185	43.4326	4.38823e-11	6.51441e-10
ENSG00000167074	TEF	thyrotrophic embryonic factor [Source:HGNC Symbol;Acc:11722]	0.873654	3.963	43.4317	4.39016e-11	6.51441e-10
ENSG00000125868	DSTN	destrin (actin depolymerizing factor) [Source:HGNC Symbol;Acc:15750]	-0.436208	7.27588	43.4088	4.44188e-11	6.58456e-10
ENSG00000149273	RPS3	ribosomal protein S3 [Source:HGNC Symbol;Acc:10420]	0.361031	9.83069	43.3109	4.66968e-11	6.91533e-10
ENSG00000162783	IER5	immediate early response 5 [Source:HGNC Symbol;Acc:5393]	0.561612	5.79265	43.3041	4.68596e-11	6.93251e-10
ENSG00000111012	CYP27B1	cytochrome P450, family 27, subfamily B, polypeptide 1 [Source:HGNC Symbol;Acc:2606]	1.22393	2.28982	43.2691	4.77056e-11	7.05062e-10
ENSG00000129993	CBFA2T3	core-binding factor, runt domain, alpha subunit 2; translocated to, 3 [Source:HGNC Symbol;Acc:1537]	-1.39244	2.35847	43.2632	4.78495e-11	7.06484e-10
ENSG00000197712	FAM114A1	family with sequence similarity 114, member A1 [Source:HGNC Symbol;Acc:25087]	-1.68129	1.3794	43.2584	4.7967e-11	7.07514e-10
ENSG00000184481	FOXO4	forkhead box O4 [Source:HGNC Symbol;Acc:7139]	-1.5619	2.3907	43.2548	4.80569e-11	7.08134e-10
ENSG00000102057	KCND1	potassium voltage-gated channel, Shal-related subfamily, member 1 [Source:HGNC Symbol;Acc:6237]	2.55071	1.07601	43.2062	4.92643e-11	7.25204e-10
ENSG00000225308	ASS1P11	argininosuccinate synthetase 1 pseudogene 11 [Source:HGNC Symbol;Acc:761]	-2.1572	0.720263	43.1864	4.97653e-11	7.31851e-10
ENSG00000029363	BCLAF1	BCL2-associated transcription factor 1 [Source:HGNC Symbol;Acc:16863]	-0.362141	9.18557	43.0467	5.3448e-11	7.85229e-10
ENSG00000101210	EEF1A2	eukaryotic translation elongation factor 1 alpha 2 [Source:HGNC Symbol;Acc:3192]	0.617915	6.66589	43.0361	5.37384e-11	7.88714e-10
ENSG00000175175	PPM1E	protein phosphatase, Mg2+/Mn2+ dependent, 1E [Source:HGNC Symbol;Acc:19322]	0.41508	7.24568	43.0314	5.3868e-11	7.89834e-10
ENSG00000172020	GAP43	growth associated protein 43 [Source:HGNC Symbol;Acc:4140]	1.8668	0.922959	42.99	5.50216e-11	8.05949e-10
ENSG00000255353	RP11-382M14.1		-2.1895	0.543365	42.9594	5.58885e-11	8.17839e-10
ENSG00000122565	CBX3	chromobox homolog 3 [Source:HGNC Symbol;Acc:1553]	-0.381458	9.27074	42.9282	5.67869e-11	8.30165e-10
ENSG00000083845	RPS5	ribosomal protein S5 [Source:HGNC Symbol;Acc:10426]	0.462888	7.79928	42.838	5.94652e-11	8.68461e-10
ENSG00000077097	TOP2B	topoisomerase (DNA) II beta 180kDa [Source:HGNC Symbol;Acc:11990]	-0.357875	9.19719	42.8127	6.02389e-11	8.78894e-10
ENSG00000168348	INSM2	insulinoma-associated 2 [Source:HGNC Symbol;Acc:17539]	-0.973874	3.36263	42.7992	6.0656e-11	8.84109e-10
ENSG00000105928	DFNA5	deafness, autosomal dominant 5 [Source:HGNC Symbol;Acc:2810]	-0.877606	3.54032	42.7962	6.07497e-11	8.84604e-10
ENSG00000113851	CRBN	cereblon [Source:HGNC Symbol;Acc:30185]	-0.533514	5.87953	42.7388	6.25593e-11	9.10059e-10
ENSG00000153956	CACNA2D1	calcium channel, voltage-dependent, alpha 2/delta subunit 1 [Source:HGNC Symbol;Acc:1399]	-0.492642	6.44138	42.7122	6.34156e-11	9.21612e-10
ENSG00000153561	RMND5A	required for meiotic nuclear division 5 homolog A (S. cerevisiae) [Source:HGNC Symbol;Acc:25850]	-0.430818	6.84671	42.7062	6.3609e-11	9.23515e-10
ENSG00000102144	PGK1	phosphoglycerate kinase 1 [Source:HGNC Symbol;Acc:8896]	0.349578	9.00754	42.6717	6.47429e-11	9.39057e-10
ENSG00000261115	TMEM178B	transmembrane protein 178B [Source:HGNC Symbol;Acc:44112]	0.605797	5.46665	42.6527	6.53755e-11	9.47305e-10
ENSG00000172201	ID4	inhibitor of DNA binding 4, dominant negative helix-loop-helix protein [Source:HGNC Symbol;Acc:5363]	-0.859688	4.11925	42.6237	6.63522e-11	9.60518e-10
ENSG00000128512	DOCK4	dedicator of cytokinesis 4 [Source:HGNC Symbol;Acc:19192]	0.633881	5.15402	42.6077	6.6897e-11	9.67458e-10
ENSG00000123358	NR4A1	nuclear receptor subfamily 4, group A, member 1 [Source:HGNC Symbol;Acc:7980]	1.08591	3.38599	42.502	7.06098e-11	1.01989e-09
ENSG00000186364	NUDT17	nudix (nucleoside diphosphate linked moiety X)-type motif 17 [Source:HGNC Symbol;Acc:26618]	0.888102	4.18578	42.5006	7.06601e-11	1.01989e-09
ENSG00000136205	TNS3	tensin 3 [Source:HGNC Symbol;Acc:21616]	-0.785489	4.16421	42.4678	7.18559e-11	1.03614e-09
ENSG00000245910	SNHG6	small nucleolar RNA host gene 6 (non-protein coding) [Source:HGNC Symbol;Acc:32965]	0.503016	6.11667	42.4149	7.38271e-11	1.06353e-09
ENSG00000033327	GAB2	GRB2-associated binding protein 2 [Source:HGNC Symbol;Acc:14458]	-0.79666	4.23744	42.3533	7.61879e-11	1.09647e-09
ENSG00000145990	GFOD1	glucose-fructose oxidoreductase domain containing 1 [Source:HGNC Symbol;Acc:21096]	0.861479	3.74179	42.3382	7.67767e-11	1.10387e-09
ENSG00000188846	RPL14	ribosomal protein L14 [Source:HGNC Symbol;Acc:10305]	0.360732	8.5789	42.3323	7.70093e-11	1.10614e-09
ENSG00000048649	RSF1	remodeling and spacing factor 1 [Source:HGNC Symbol;Acc:18118]	-0.394161	7.61344	42.2683	7.95735e-11	1.14187e-09
ENSG00000183722	LHFP	lipoma HMGIC fusion partner [Source:HGNC Symbol;Acc:6586]	-0.683878	4.67347	42.2661	7.96597e-11	1.14199e-09
ENSG00000169375	SIN3A	SIN3 transcription regulator homolog A (yeast) [Source:HGNC Symbol;Acc:19353]	-0.481975	6.76612	42.2501	8.03161e-11	1.15029e-09
ENSG00000144815	NXPE3	neurexophilin and PC-esterase domain family, member 3 [Source:HGNC Symbol;Acc:28238]	-0.475017	6.24375	42.2143	8.17979e-11	1.17038e-09
ENSG00000050030	KIAA2022	KIAA2022 [Source:HGNC Symbol;Acc:29433]	-0.595918	5.18973	42.0982	8.68047e-11	1.24082e-09
ENSG00000243185	-	A)	-0.617474	5.79494	41.9285	9.46709e-11	1.35196e-09
ENSG00000146701	MDH2	malate dehydrogenase 2, NAD (mitochondrial) [Source:HGNC Symbol;Acc:6971]	0.439291	7.59749	41.9222	9.49758e-11	1.35501e-09
ENSG00000185477	GPRIN3	GPRIN family member 3 [Source:HGNC Symbol;Acc:27733]	-0.453829	6.46158	41.8038	1.00909e-10	1.43806e-09
ENSG00000196428	TSC22D2	TSC22 domain family, member 2 [Source:HGNC Symbol;Acc:29095]	-0.479937	6.22081	41.8022	1.00991e-10	1.43806e-09
ENSG00000044115	CTNNA1	catenin (cadherin-associated protein), alpha 1, 102kDa [Source:HGNC Symbol;Acc:2509]	-0.377127	7.9709	41.7972	1.0125e-10	1.44035e-09
ENSG00000168944	CEP120	centrosomal protein 120kDa [Source:HGNC Symbol;Acc:26690]	0.43925	6.9963	41.7753	1.02387e-10	1.45514e-09
ENSG00000183798	EMILIN3	elastin microfibril interfacer 3 [Source:HGNC Symbol;Acc:16123]	-1.42701	1.70313	41.7535	1.03539e-10	1.47009e-09
ENSG00000072422	RHOBTB1	Rho-related BTB domain containing 1 [Source:HGNC Symbol;Acc:18738]	-0.566653	5.48323	41.6829	1.07344e-10	1.52266e-09
ENSG00000036054	TBC1D23	TBC1 domain family, member 23 [Source:HGNC Symbol;Acc:25622]	-0.536546	5.86009	41.6384	1.09817e-10	1.55625e-09
ENSG00000183010	PYCR1	pyrroline-5-carboxylate reductase 1 [Source:HGNC Symbol;Acc:9721]	0.520104	7.26366	41.5647	1.14032e-10	1.61444e-09
ENSG00000030582	GRN	granulin [Source:HGNC Symbol;Acc:4601]	-0.609066	6.16142	41.4619	1.20192e-10	1.70002e-09
ENSG00000233947	RP11-336N8.2		-1.82851	0.794958	41.3879	1.24826e-10	1.76388e-09
ENSG00000118946	PCDH17	protocadherin 17 [Source:HGNC Symbol;Acc:14267]	-1.41639	2.01521	41.347	1.2747e-10	1.79905e-09
ENSG00000111639	MRPL51	mitochondrial ribosomal protein L51 [Source:HGNC Symbol;Acc:14044]	-0.443486	6.73991	41.3456	1.27558e-10	1.79905e-09
ENSG00000133169	BEX1	brain expressed, X-linked 1 [Source:HGNC Symbol;Acc:1036]	-0.411558	6.96771	41.3017	1.30454e-10	1.83747e-09
ENSG00000120647	CCDC77	coiled-coil domain containing 77 [Source:HGNC Symbol;Acc:28203]	-0.586986	5.43226	41.3006	1.3053e-10	1.83747e-09
ENSG00000140463	BBS4	Bardet-Biedl syndrome 4 [Source:HGNC Symbol;Acc:969]	-0.559452	5.38306	41.2197	1.36045e-10	1.91329e-09
ENSG00000142731	PLK4	polo-like kinase 4 [Source:HGNC Symbol;Acc:11397]	-0.503532	6.29588	41.1884	1.38241e-10	1.94233e-09
ENSG00000140521	POLG	polymerase (DNA directed), gamma [Source:HGNC Symbol;Acc:9179]	0.56727	6.22163	41.1125	1.43716e-10	2.01733e-09
ENSG00000014914	MTMR11	myotubularin related protein 11 [Source:HGNC Symbol;Acc:24307]	1.37198	2.75555	41.1079	1.4405e-10	2.02012e-09
ENSG00000166483	WEE1	WEE1 homolog (S. pombe) [Source:HGNC Symbol;Acc:12761]	-0.482464	6.23663	41.0433	1.4889e-10	2.08601e-09
ENSG00000204628	GNB2L1	guanine nucleotide binding protein (G protein), beta polypeptide 2-like 1 [Source:HGNC Symbol;Acc:4399]	0.368855	10.1783	40.99	1.5301e-10	2.14171e-09
ENSG00000134824	FADS2	fatty acid desaturase 2 [Source:HGNC Symbol;Acc:3575]	0.47567	7.68367	40.927	1.58022e-10	2.20977e-09
ENSG00000137880	GCHFR	GTP cyclohydrolase I feedback regulator [Source:HGNC Symbol;Acc:4194]	-1.40595	1.67933	40.8953	1.60605e-10	2.24378e-09
ENSG00000114127	XRN1	5'-3' exoribonuclease 1 [Source:HGNC Symbol;Acc:30654]	-0.521029	6.1066	40.8429	1.64967e-10	2.30255e-09
ENSG00000120254	MTHFD1L	methylenetetrahydrofolate dehydrogenase (NADP+ dependent) 1-like [Source:HGNC Symbol;Acc:21055]	0.43616	6.77232	40.8407	1.65159e-10	2.30305e-09
ENSG00000227051	C14orf132	chromosome 14 open reading frame 132 [Source:HGNC Symbol;Acc:20346]	-0.364946	8.53753	40.7219	1.75506e-10	2.44503e-09
ENSG00000225539	AC018799.1		-0.993022	3.25344	40.7062	1.76922e-10	2.46244e-09
ENSG00000038219	BOD1L1	biorientation of chromosomes in cell division 1-like 1 [Source:HGNC Symbol;Acc:31792]	-0.389468	7.46378	40.6615	1.81021e-10	2.51712e-09
ENSG00000173692	PSMD1	proteasome (prosome, macropain) 26S subunit, non-ATPase, 1 [Source:HGNC Symbol;Acc:9554]	-0.367594	8.13398	40.613	1.85572e-10	2.57798e-09
ENSG00000161057	PSMC2	proteasome (prosome, macropain) 26S subunit, ATPase, 2 [Source:HGNC Symbol;Acc:9548]	-0.405282	7.1677	40.5925	1.87525e-10	2.60268e-09
ENSG00000186184	POLR1D	polymerase (RNA) I polypeptide D, 16kDa [Source:HGNC Symbol;Acc:20422]	0.449578	6.48318	40.5559	1.91067e-10	2.64935e-09
ENSG00000185344	ATP6V0A2	ATPase, H+ transporting, lysosomal V0 subunit a2 [Source:HGNC Symbol;Acc:18481]	0.478368	6.10422	40.5267	1.93944e-10	2.68674e-09
ENSG00000128709	HOXD9	homeobox D9 [Source:HGNC Symbol;Acc:5140]	-1.12923	2.96732	40.4698	1.99681e-10	2.76363e-09
ENSG00000134602	MST4	Serine/threonine-protein kinase MST4 [Source:UniProtKB/Swiss-Prot;Acc:Q9P289]	0.528371	6.53801	40.4411	2.02628e-10	2.8018e-09
ENSG00000140545	MFGE8	milk fat globule-EGF factor 8 protein [Source:HGNC Symbol;Acc:7036]	-0.679692	5.10813	40.2432	2.24234e-10	3.09765e-09
ENSG00000179335	CLK3	CDC-like kinase 3 [Source:HGNC Symbol;Acc:2071]	0.661168	5.59393	40.2133	2.27688e-10	3.14244e-09
ENSG00000169607	CKAP2L	cytoskeleton associated protein 2-like [Source:HGNC Symbol;Acc:26877]	-0.590541	5.61606	40.1905	2.30365e-10	3.17642e-09
ENSG00000074370	ATP2A3	ATPase, Ca++ transporting, ubiquitous [Source:HGNC Symbol;Acc:813]	-1.85526	1.12964	40.1857	2.30934e-10	3.18131e-09
ENSG00000117620	SLC35A3	solute carrier family 35 (UDP-N-acetylglucosamine (UDP-GlcNAc) transporter), member A3 [Source:HGNC Symbol;Acc:11023]	-0.590618	5.70399	40.1482	2.35413e-10	3.23999e-09
ENSG00000136999	NOV	nephroblastoma overexpressed [Source:HGNC Symbol;Acc:7885]	2.36173	0.631579	40.0819	2.43535e-10	3.34866e-09
ENSG00000145247	OCIAD2	OCIA domain containing 2 [Source:HGNC Symbol;Acc:28685]	-0.488976	6.12581	40.0422	2.48529e-10	3.41417e-09
ENSG00000157106	SMG1	smg-1 homolog, phosphatidylinositol 3-kinase-related kinase (C. elegans) [Source:HGNC Symbol;Acc:30045]	0.355448	8.47336	40.0202	2.51346e-10	3.44966e-09
ENSG00000168653	NDUFS5	NADH dehydrogenase (ubiquinone) Fe-S protein 5, 15kDa (NADH-coenzyme Q reductase) [Source:HGNC Symbol;Acc:7712]	-0.381736	7.82116	40.0097	2.52703e-10	3.46508e-09
ENSG00000106080	FKBP14	FK506 binding protein 14, 22 kDa [Source:HGNC Symbol;Acc:18625]	0.560033	5.61604	39.9751	2.57216e-10	3.52369e-09
ENSG00000068793	CYFIP1	cytoplasmic FMR1 interacting protein 1 [Source:HGNC Symbol;Acc:13759]	-0.497415	5.91115	39.951	2.60408e-10	3.56101e-09
ENSG00000198146	ZNF770	zinc finger protein 770 [Source:HGNC Symbol;Acc:26061]	0.427628	6.89998	39.9496	2.60606e-10	3.56101e-09
ENSG00000027001	MIPEP	mitochondrial intermediate peptidase [Source:HGNC Symbol;Acc:7104]	0.794314	4.05883	39.9491	2.60661e-10	3.56101e-09
ENSG00000160796	NBEAL2	neurobeachin-like 2 [Source:HGNC Symbol;Acc:31928]	0.782602	4.66821	39.9365	2.6235e-10	3.58077e-09
ENSG00000119950	MXI1	MAX interactor 1 [Source:HGNC Symbol;Acc:7534]	-0.630252	4.96279	39.9116	2.65716e-10	3.62338e-09
ENSG00000184992	BRI3BP	BRI3 binding protein [Source:HGNC Symbol;Acc:14251]	0.413516	6.90705	39.8951	2.67976e-10	3.65084e-09
ENSG00000167306	MYO5B	myosin VB [Source:HGNC Symbol;Acc:7603]	0.871435	3.96985	39.8233	2.78011e-10	3.78407e-09
ENSG00000013374	NUB1	negative regulator of ubiquitin-like proteins 1 [Source:HGNC Symbol;Acc:17623]	-0.508149	5.79216	39.8045	2.80705e-10	3.81722e-09
ENSG00000168542	COL3A1	collagen, type III, alpha 1 [Source:HGNC Symbol;Acc:2201]	-1.11422	2.52176	39.7979	2.81642e-10	3.82646e-09
ENSG00000162735	PEX19	peroxisomal biogenesis factor 19 [Source:HGNC Symbol;Acc:9713]	-0.371939	7.86733	39.7877	2.83127e-10	3.8431e-09
ENSG00000131469	RPL27	ribosomal protein L27 [Source:HGNC Symbol;Acc:10328]	0.321245	10.3075	39.7663	2.86246e-10	3.88188e-09
ENSG00000076108	BAZ2A	bromodomain adjacent to zinc finger domain, 2A [Source:HGNC Symbol;Acc:962]	-0.430582	7.42208	39.7538	2.88073e-10	3.90308e-09
ENSG00000137726	FXYD6	FXYD domain containing ion transport regulator 6 [Source:HGNC Symbol;Acc:4030]	-0.631436	5.27099	39.7347	2.90914e-10	3.93798e-09
ENSG00000139514	SLC7A1	solute carrier family 7 (cationic amino acid transporter, y+ system), member 1 [Source:HGNC Symbol;Acc:11057]	0.439165	7.10103	39.7255	2.9228e-10	3.95285e-09
ENSG00000188647	PTAR1	protein prenyltransferase alpha subunit repeat containing 1 [Source:HGNC Symbol;Acc:30449]	-0.374607	8.18759	39.7045	2.95445e-10	3.99201e-09
ENSG00000065809	FAM107B	family with sequence similarity 107, member B [Source:HGNC Symbol;Acc:23726]	0.416725	7.25852	39.6655	3.01402e-10	4.06879e-09
ENSG00000198408	MGEA5	meningioma expressed antigen 5 (hyaluronidase) [Source:HGNC Symbol;Acc:7056]	-0.375993	8.18626	39.5805	3.14819e-10	4.24604e-09
ENSG00000011021	CLCN6	chloride channel, voltage-sensitive 6 [Source:HGNC Symbol;Acc:2024]	0.708982	4.4504	39.5199	3.24742e-10	4.37588e-09
ENSG00000173546	CSPG4	chondroitin sulfate proteoglycan 4 [Source:HGNC Symbol;Acc:2466]	-1.80824	1.59645	39.5043	3.27343e-10	4.40693e-09
ENSG00000101871	MID1	midline 1 (Opitz/BBB syndrome) [Source:HGNC Symbol;Acc:7095]	-0.676916	4.5007	39.4732	3.32584e-10	4.47343e-09
ENSG00000174721	FGFBP3	fibroblast growth factor binding protein 3 [Source:HGNC Symbol;Acc:23428]	0.909884	3.58386	39.466	3.33821e-10	4.48598e-09
ENSG00000232472	EEF1B2P3	eukaryotic translation elongation factor 1 beta 2 pseudogene 3 [Source:HGNC Symbol;Acc:3210]	0.447189	6.58486	39.4247	3.40956e-10	4.57771e-09
ENSG00000127483	HP1BP3	heterochromatin protein 1, binding protein 3 [Source:HGNC Symbol;Acc:24973]	-0.397269	7.16836	39.4198	3.41814e-10	4.58507e-09
ENSG00000236439	RP11-175B9.3		0.457173	6.36665	39.4005	3.45206e-10	4.62638e-09
ENSG00000127922	SHFM1	split hand/foot malformation (ectrodactyly) type 1 [Source:HGNC Symbol;Acc:10845]	-0.412854	6.76971	39.3677	3.51062e-10	4.70061e-09
ENSG00000112294	ALDH5A1	aldehyde dehydrogenase 5 family, member A1 [Source:HGNC Symbol;Acc:408]	-0.70748	4.49686	39.3407	3.55944e-10	4.76168e-09
ENSG00000236404	RP11-125B21.2		2.10249	0.553557	39.2712	3.68851e-10	4.92989e-09
ENSG00000088992	TESC	tescalcin [Source:HGNC Symbol;Acc:26065]	-1.00635	2.9652	39.2668	3.69673e-10	4.93642e-09
ENSG00000086619	ERO1LB	ERO1-like beta (S. cerevisiae) [Source:HGNC Symbol;Acc:14355]	-0.976725	3.01449	39.2159	3.79439e-10	5.06227e-09
ENSG00000101361	NOP56	NOP56 ribonucleoprotein homolog (yeast) [Source:HGNC Symbol;Acc:15911]	0.362526	8.37898	39.2004	3.82467e-10	5.0939e-09
ENSG00000125772	GPCPD1	glycerophosphocholine phosphodiesterase GDE1 homolog (S. cerevisiae) [Source:HGNC Symbol;Acc:26957]	-0.63356	4.93052	39.2002	3.82498e-10	5.0939e-09
ENSG00000183878	UTY	ubiquitously transcribed tetratricopeptide repeat gene, Y-linked [Source:HGNC Symbol;Acc:12638]	-0.678508	4.57886	39.1387	3.94747e-10	5.25229e-09
ENSG00000104447	TRPS1	trichorhinophalangeal syndrome I [Source:HGNC Symbol;Acc:12340]	0.595061	5.28749	39.1218	3.98177e-10	5.29318e-09
ENSG00000172575	RASGRP1	RAS guanyl releasing protein 1 (calcium and DAG-regulated) [Source:HGNC Symbol;Acc:9878]	1.56593	1.9498	39.1183	3.98895e-10	5.29796e-09
ENSG00000203805	PPAPDC1A	phosphatidic acid phosphatase type 2 domain containing 1A [Source:HGNC Symbol;Acc:23531]	-1.4144	1.6194	39.0792	4.06957e-10	5.4002e-09
ENSG00000064309	CDON	Cdon homolog (mouse) [Source:HGNC Symbol;Acc:17104]	-0.419983	7.22295	38.9174	4.4213e-10	5.86169e-09
ENSG00000154917	RAB6B	RAB6B, member RAS oncogene family [Source:HGNC Symbol;Acc:14902]	0.628735	4.94222	38.9122	4.43311e-10	5.87208e-09
ENSG00000185950	IRS2	insulin receptor substrate 2 [Source:HGNC Symbol;Acc:6126]	-1.12841	2.57855	38.859	4.55557e-10	6.0289e-09
ENSG00000038295	TLL1	tolloid-like 1 [Source:HGNC Symbol;Acc:11843]	1.93326	1.23803	38.8424	4.59445e-10	6.07492e-09
ENSG00000065060	UHRF1BP1	UHRF1 binding protein 1 [Source:HGNC Symbol;Acc:21216]	0.46471	6.20459	38.8081	4.67574e-10	6.17689e-09
ENSG00000243172	-	A)	-0.556706	6.34425	38.7814	4.74026e-10	6.25655e-09
ENSG00000066027	PPP2R5A	protein phosphatase 2, regulatory subunit B', alpha [Source:HGNC Symbol;Acc:9309]	0.58336	5.25669	38.7328	4.85979e-10	6.4086e-09
ENSG00000136003	ISCU	iron-sulfur cluster scaffold homolog (E. coli) [Source:HGNC Symbol;Acc:29882]	-0.458886	6.18885	38.5923	5.22259e-10	6.8809e-09
ENSG00000070540	WIPI1	WD repeat domain, phosphoinositide interacting 1 [Source:HGNC Symbol;Acc:25471]	-0.935399	2.96943	38.5849	5.24242e-10	6.90089e-09
ENSG00000149926	FAM57B	family with sequence similarity 57, member B [Source:HGNC Symbol;Acc:25295]	0.823058	4.67849	38.5802	5.25497e-10	6.91127e-09
ENSG00000254202	RP11-120I21.2		-0.873895	3.72317	38.5645	5.29751e-10	6.95805e-09
ENSG00000174460	ZCCHC12	zinc finger, CCHC domain containing 12 [Source:HGNC Symbol;Acc:27273]	1.83494	1.04865	38.5636	5.29994e-10	6.95805e-09
ENSG00000152253	SPC25	SPC25, NDC80 kinetochore complex component, homolog (S. cerevisiae) [Source:HGNC Symbol;Acc:24031]	-0.624599	4.94904	38.561	5.30696e-10	6.96109e-09
ENSG00000109756	RAPGEF2	Rap guanine nucleotide exchange factor (GEF) 2 [Source:HGNC Symbol;Acc:16854]	-0.500437	5.72647	38.5427	5.35689e-10	7.02037e-09
ENSG00000100292	HMOX1	heme oxygenase (decycling) 1 [Source:HGNC Symbol;Acc:5013]	-1.52342	2.1311	38.5343	5.37997e-10	7.04439e-09
ENSG00000145495	MARCH6	membrane-associated ring finger (C3HC4) 6, E3 ubiquitin protein ligase [Source:HGNC Symbol;Acc:30550]	-0.353398	8.00038	38.4814	5.52771e-10	7.23144e-09
ENSG00000123607	TTC21B	tetratricopeptide repeat domain 21B [Source:HGNC Symbol;Acc:25660]	-0.48212	5.95425	38.4164	5.71506e-10	7.46993e-09
ENSG00000103995	CEP152	centrosomal protein 152kDa [Source:HGNC Symbol;Acc:29298]	0.425992	6.75472	38.392	5.78695e-10	7.55723e-09
ENSG00000138629	UBL7	ubiquitin-like 7 (bone marrow stromal cell-derived) [Source:HGNC Symbol;Acc:28221]	-0.579862	5.4546	38.385	5.80786e-10	7.57784e-09
ENSG00000168214	RBPJ	recombination signal binding protein for immunoglobulin kappa J region [Source:HGNC Symbol;Acc:5724]	-0.3697	7.84264	38.3631	5.87328e-10	7.65647e-09
ENSG00000171587	DSCAM	Down syndrome cell adhesion molecule [Source:HGNC Symbol;Acc:3039]	-3.09334	0.0868822	38.3382	5.94853e-10	7.74773e-09
ENSG00000169744	LDB2	LIM domain binding 2 [Source:HGNC Symbol;Acc:6533]	1.27293	1.83439	38.2974	6.07435e-10	7.90466e-09
ENSG00000122359	ANXA11	annexin A11 [Source:HGNC Symbol;Acc:535]	-0.754733	4.02529	38.2696	6.16152e-10	8.01105e-09
ENSG00000205592	MUC19	mucin 19, oligomeric [Source:HGNC Symbol;Acc:14362]	1.19694	3.09112	38.2645	6.1775e-10	8.02479e-09
ENSG00000088832	FKBP1A	FK506 binding protein 1A, 12kDa [Source:HGNC Symbol;Acc:3711]	-0.369339	7.65234	38.198	6.39192e-10	8.29605e-09
ENSG00000241530	-	A)	-0.716403	5.53695	38.1924	6.41017e-10	8.31246e-09
ENSG00000104325	DECR1	2,4-dienoyl CoA reductase 1, mitochondrial [Source:HGNC Symbol;Acc:2753]	-0.550861	5.6081	38.1758	6.46477e-10	8.37592e-09
ENSG00000119403	PHF19	PHD finger protein 19 [Source:HGNC Symbol;Acc:24566]	-0.597001	5.1924	38.169	6.48756e-10	8.3981e-09
ENSG00000158470	B4GALT5	UDP-Gal:betaGlcNAc beta 1,4- galactosyltransferase, polypeptide 5 [Source:HGNC Symbol;Acc:928]	0.391493	7.04225	38.1565	6.52906e-10	8.44444e-09
ENSG00000177119	ANO6	anoctamin 6 [Source:HGNC Symbol;Acc:25240]	-0.367746	7.58217	38.0375	6.93994e-10	8.96803e-09
ENSG00000105438	KDELR1	KDEL (Lys-Asp-Glu-Leu) endoplasmic reticulum protein retention receptor 1 [Source:HGNC Symbol;Acc:6304]	-0.416367	7.00766	38.0316	6.96071e-10	8.98703e-09
ENSG00000108561	C1QBP	complement component 1, q subcomponent binding protein [Source:HGNC Symbol;Acc:1243]	0.372102	7.68944	37.9489	7.26235e-10	9.36831e-09
ENSG00000153707	PTPRD	protein tyrosine phosphatase, receptor type, D [Source:HGNC Symbol;Acc:9668]	0.532382	5.66924	37.9237	7.35663e-10	9.48166e-09
ENSG00000100330	MTMR3	myotubularin related protein 3 [Source:HGNC Symbol;Acc:7451]	-0.511074	5.68893	37.9031	7.43487e-10	9.57417e-09
ENSG00000159399	HK2	hexokinase 2 [Source:HGNC Symbol;Acc:4923]	0.359888	7.7396	37.8807	7.52073e-10	9.67115e-09
ENSG00000113161	HMGCR	3-hydroxy-3-methylglutaryl-CoA reductase [Source:HGNC Symbol;Acc:5006]	0.359991	8.22645	37.88	7.52324e-10	9.67115e-09
ENSG00000010818	HIVEP2	human immunodeficiency virus type I enhancer binding protein 2 [Source:HGNC Symbol;Acc:4921]	0.705675	4.23093	37.878	7.5308e-10	9.67248e-09
ENSG00000173442	EHBP1L1	EH domain binding protein 1-like 1 [Source:HGNC Symbol;Acc:30682]	1.82609	1.28858	37.85	7.6397e-10	9.80384e-09
ENSG00000165801	ARHGEF40	Rho guanine nucleotide exchange factor (GEF) 40 [Source:HGNC Symbol;Acc:25516]	-1.04421	2.84414	37.841	7.67519e-10	9.84085e-09
ENSG00000205978	NYNRIN	NYN domain and retroviral integrase containing [Source:HGNC Symbol;Acc:20165]	-0.611272	5.22577	37.8355	7.69687e-10	9.86012e-09
ENSG00000143947	RPS27A	ribosomal protein S27a [Source:HGNC Symbol;Acc:10417]	0.331872	8.9677	37.7751	7.93889e-10	1.01614e-08
ENSG00000143164	DCAF6	DDB1 and CUL4 associated factor 6 [Source:HGNC Symbol;Acc:30002]	-0.513	5.87463	37.6146	8.61957e-10	1.10231e-08
ENSG00000187479	C11orf96	chromosome 11 open reading frame 96 [Source:HGNC Symbol;Acc:38675]	-1.70558	0.960207	37.5157	9.06797e-10	1.15865e-08
ENSG00000119632	IFI27L2	interferon, alpha-inducible protein 27-like 2 [Source:HGNC Symbol;Acc:19753]	-1.08988	2.50701	37.4918	9.18002e-10	1.17196e-08
ENSG00000010810	FYN	FYN oncogene related to SRC, FGR, YES [Source:HGNC Symbol;Acc:4037]	-0.431937	6.52702	37.4578	9.34122e-10	1.19151e-08
ENSG00000261128	RP11-18F14.2		-0.975459	3.07833	37.4237	9.50593e-10	1.21147e-08
ENSG00000143545	RAB13	RAB13, member RAS oncogene family [Source:HGNC Symbol;Acc:9762]	-0.653127	4.4009	37.3565	9.83903e-10	1.25285e-08
ENSG00000197157	SND1	staphylococcal nuclease and tudor domain containing 1 [Source:HGNC Symbol;Acc:30646]	0.382251	7.46359	37.336	9.94332e-10	1.26504e-08
ENSG00000107562	CXCL12	chemokine (C-X-C motif) ligand 12 [Source:HGNC Symbol;Acc:10672]	-0.682789	4.19342	37.3197	1.00265e-09	1.27453e-08
ENSG00000203644	AC083799.1		-1.17852	2.23227	37.3144	1.00537e-09	1.27631e-08
ENSG00000008277	ADAM22	ADAM metallopeptidase domain 22 [Source:HGNC Symbol;Acc:201]	0.591745	5.21652	37.3137	1.00578e-09	1.27631e-08
ENSG00000142149	HUNK	hormonally up-regulated Neu-associated kinase [Source:HGNC Symbol;Acc:13326]	0.532451	5.45178	37.2744	1.02621e-09	1.30113e-08
ENSG00000137955	RABGGTB	Rab geranylgeranyltransferase, beta subunit [Source:HGNC Symbol;Acc:9796]	0.366346	8.01789	37.2723	1.02733e-09	1.30143e-08
ENSG00000082512	TRAF5	TNF receptor-associated factor 5 [Source:HGNC Symbol;Acc:12035]	-0.482183	5.95965	37.2286	1.05062e-09	1.3298e-08
ENSG00000167281	RBFOX3	RNA binding protein, fox-1 homolog (C. elegans) 3 [Source:HGNC Symbol;Acc:27097]	-0.718509	4.77197	37.2044	1.06371e-09	1.34521e-08
ENSG00000170540	ARL6IP1	ADP-ribosylation factor-like 6 interacting protein 1 [Source:HGNC Symbol;Acc:697]	-0.344202	8.80029	37.193	1.07e-09	1.35201e-08
ENSG00000167615	LENG8	leukocyte receptor cluster (LRC) member 8 [Source:HGNC Symbol;Acc:15500]	0.650451	6.07986	37.1739	1.08049e-09	1.3641e-08
ENSG00000147050	KDM6A	lysine (K)-specific demethylase 6A [Source:HGNC Symbol;Acc:12637]	-0.601036	5.41098	37.1698	1.08276e-09	1.36581e-08
ENSG00000237289	CKMT1B	creatine kinase, mitochondrial 1B [Source:HGNC Symbol;Acc:1995]	0.802848	3.70128	37.1281	1.10617e-09	1.39415e-08
ENSG00000100626	GALNTL1	UDP-N-acetyl-alpha-D-galactosamine:polypeptide N-acetylgalactosaminyltransferase-like 1 [Source:HGNC Symbol;Acc:23233]	0.792308	3.82566	37.0712	1.13895e-09	1.43424e-08
ENSG00000137040	RANBP6	RAN binding protein 6 [Source:HGNC Symbol;Acc:9851]	0.378215	7.54257	37.0099	1.17532e-09	1.47879e-08
ENSG00000108671	PSMD11	proteasome (prosome, macropain) 26S subunit, non-ATPase, 11 [Source:HGNC Symbol;Acc:9556]	-0.360853	7.53511	36.9466	1.21412e-09	1.52631e-08
ENSG00000198929	NOS1AP	nitric oxide synthase 1 (neuronal) adaptor protein [Source:HGNC Symbol;Acc:16859]	2.28424	0.16701	36.8965	1.24566e-09	1.56464e-08
ENSG00000121957	GPSM2	G-protein signaling modulator 2 [Source:HGNC Symbol;Acc:29501]	-0.374418	7.29266	36.8402	1.28219e-09	1.60915e-08
ENSG00000082497	SERTAD4	SERTA domain containing 4 [Source:HGNC Symbol;Acc:25236]	0.718328	3.99949	36.8297	1.2891e-09	1.61645e-08
ENSG00000071082	RPL31	ribosomal protein L31 [Source:HGNC Symbol;Acc:10334]	0.322734	9.38752	36.7076	1.37244e-09	1.71949e-08
ENSG00000110400	PVRL1	poliovirus receptor-related 1 (herpesvirus entry mediator C) [Source:HGNC Symbol;Acc:9706]	0.811667	3.99159	36.6535	1.41102e-09	1.76634e-08
ENSG00000150093	ITGB1	integrin, beta 1 (fibronectin receptor, beta polypeptide, antigen CD29 includes MDF2, MSK12) [Source:HGNC Symbol;Acc:6153]	-0.335618	9.2055	36.6483	1.41484e-09	1.76962e-08
ENSG00000141699	FAM134C	family with sequence similarity 134, member C [Source:HGNC Symbol;Acc:27258]	-0.464275	6.14092	36.6289	1.42898e-09	1.7858e-08
ENSG00000142784	WDTC1	WD and tetratricopeptide repeats 1 [Source:HGNC Symbol;Acc:29175]	-0.731279	4.34078	36.5719	1.47137e-09	1.83723e-08
ENSG00000078549	ADCYAP1R1	adenylate cyclase activating polypeptide 1 (pituitary) receptor type I [Source:HGNC Symbol;Acc:242]	0.422394	7.206	36.5484	1.48924e-09	1.85797e-08
ENSG00000148123	RP11-35N6.1	Lipid phosphate phosphatase-related protein type 1 [Source:UniProtKB/Swiss-Prot;Acc:Q8TBJ4]	-0.777112	3.87809	36.5378	1.49733e-09	1.86649e-08
ENSG00000196659	TTC30B	tetratricopeptide repeat domain 30B [Source:HGNC Symbol;Acc:26425]	-0.937217	2.9402	36.524	1.508e-09	1.87821e-08
ENSG00000111912	NCOA7	nuclear receptor coactivator 7 [Source:HGNC Symbol;Acc:21081]	0.83401	3.41869	36.494	1.53135e-09	1.90569e-08
ENSG00000225339	RP11-513I15.6		-0.43153	6.72017	36.4491	1.56709e-09	1.94854e-08
ENSG00000143437	ARNT	aryl hydrocarbon receptor nuclear translocator [Source:HGNC Symbol;Acc:700]	-0.366659	7.51181	36.4447	1.57059e-09	1.95125e-08
ENSG00000128641	MYO1B	myosin IB [Source:HGNC Symbol;Acc:7596]	0.359156	7.88696	36.4252	1.58641e-09	1.96925e-08
ENSG00000127252	HRASLS	HRAS-like suppressor [Source:HGNC Symbol;Acc:14922]	-0.787144	3.92572	36.3926	1.61316e-09	2.00078e-08
ENSG00000166263	STXBP4	syntaxin binding protein 4 [Source:HGNC Symbol;Acc:19694]	0.482279	6.12898	36.3616	1.63902e-09	2.03116e-08
ENSG00000163053	SLC16A14	solute carrier family 16, member 14 (monocarboxylic acid transporter 14) [Source:HGNC Symbol;Acc:26417]	0.764798	3.99968	36.3553	1.64434e-09	2.03604e-08
ENSG00000145147	SLIT2	slit homolog 2 (Drosophila) [Source:HGNC Symbol;Acc:11086]	-0.720651	4.25735	36.3349	1.66162e-09	2.05571e-08
ENSG00000162373	BEND5	BEN domain containing 5 [Source:HGNC Symbol;Acc:25668]	-0.836125	3.46028	36.275	1.71344e-09	2.11805e-08
ENSG00000140941	MAP1LC3B	microtubule-associated protein 1 light chain 3 beta [Source:HGNC Symbol;Acc:13352]	-0.580238	5.37389	36.2314	1.75221e-09	2.16417e-08
ENSG00000196998	WDR45	WD repeat domain 45 [Source:HGNC Symbol;Acc:28912]	-0.985445	3.00888	36.1992	1.7814e-09	2.19715e-08
ENSG00000169554	ZEB2	zinc finger E-box binding homeobox 2 [Source:HGNC Symbol;Acc:14881]	0.566805	5.02079	36.1987	1.78187e-09	2.19715e-08
ENSG00000125247	TMTC4	transmembrane and tetratricopeptide repeat containing 4 [Source:HGNC Symbol;Acc:25904]	-0.512626	5.57031	36.1819	1.79737e-09	2.21441e-08
ENSG00000143248	RGS5	regulator of G-protein signaling 5 [Source:HGNC Symbol;Acc:10001]	-1.16103	2.47874	36.1797	1.79931e-09	2.21496e-08
ENSG00000138413	IDH1	isocitrate dehydrogenase 1 (NADP+), soluble [Source:HGNC Symbol;Acc:5382]	0.384362	7.05078	36.1205	1.85489e-09	2.28149e-08
ENSG00000124570	SERPINB6	serpin peptidase inhibitor, clade B (ovalbumin), member 6 [Source:HGNC Symbol;Acc:8950]	-1.22686	2.13318	36.0881	1.88598e-09	2.3178e-08
ENSG00000168291	PDHB	pyruvate dehydrogenase (lipoamide) beta [Source:HGNC Symbol;Acc:8808]	-0.45478	6.20061	36.0497	1.92345e-09	2.36188e-08
ENSG00000244306	CTD-2314B22.3		-0.661114	4.46768	36.0374	1.93569e-09	2.37495e-08
ENSG00000101331	C20orf160	chromosome 20 open reading frame 160 [Source:HGNC Symbol;Acc:16153]	-1.7412	0.865581	36.0316	1.94141e-09	2.37999e-08
ENSG00000143878	RHOB	ras homolog family member B [Source:HGNC Symbol;Acc:668]	-0.606434	5.49397	36.0238	1.94925e-09	2.38763e-08
ENSG00000135002	RFK	riboflavin kinase [Source:HGNC Symbol;Acc:30324]	0.573485	5.62345	35.9521	2.02233e-09	2.47509e-08
ENSG00000234338	RP11-797H7.1		1.08844	2.7942	35.9197	2.05623e-09	2.51451e-08
ENSG00000164142	FAM160A1	family with sequence similarity 160, member A1 [Source:HGNC Symbol;Acc:34237]	1.50653	1.42664	35.8915	2.08615e-09	2.54899e-08
ENSG00000251948	-	A)	-0.637369	4.74252	35.8589	2.12134e-09	2.58985e-08
ENSG00000118495	PLAGL1	pleiomorphic adenoma gene-like 1 [Source:HGNC Symbol;Acc:9046]	0.617207	4.7717	35.8324	2.15045e-09	2.62322e-08
ENSG00000113739	STC2	stanniocalcin 2 [Source:HGNC Symbol;Acc:11374]	2.08746	0.770133	35.7899	2.19783e-09	2.67882e-08
ENSG00000180875	GREM2	gremlin 2 [Source:HGNC Symbol;Acc:17655]	2.64532	-0.282841	35.7654	2.22563e-09	2.71047e-08
ENSG00000136603	SKIL	SKI-like oncogene [Source:HGNC Symbol;Acc:10897]	-0.431095	6.61347	35.7224	2.27536e-09	2.76876e-08
ENSG00000179331	RAB39A	RAB39A, member RAS oncogene family [Source:HGNC Symbol;Acc:16521]	0.785557	3.79867	35.7204	2.27766e-09	2.76928e-08
ENSG00000131779	PEX11B	peroxisomal biogenesis factor 11 beta [Source:HGNC Symbol;Acc:8853]	-0.442374	6.33974	35.6495	2.36213e-09	2.86963e-08
ENSG00000081237	PTPRC	protein tyrosine phosphatase, receptor type, C [Source:HGNC Symbol;Acc:9666]	1.18887	2.2711	35.5794	2.44867e-09	2.97232e-08
ENSG00000185551	NR2F2	nuclear receptor subfamily 2, group F, member 2 [Source:HGNC Symbol;Acc:7976]	0.595498	5.1106	35.5753	2.45377e-09	2.97607e-08
ENSG00000018510	AGPS	alkylglycerone phosphate synthase [Source:HGNC Symbol;Acc:327]	-0.380221	7.22768	35.5675	2.46363e-09	2.98558e-08
ENSG00000105251	SHD	Src homology 2 domain containing transforming protein D [Source:HGNC Symbol;Acc:30633]	-0.533146	6.27063	35.561	2.47183e-09	2.99308e-08
ENSG00000159899	NPR2	natriuretic peptide receptor B/guanylate cyclase B (atrionatriuretic peptide receptor B) [Source:HGNC Symbol;Acc:7944]	-0.563159	5.22624	35.5316	2.50942e-09	3.03612e-08
ENSG00000164086	DUSP7	dual specificity phosphatase 7 [Source:HGNC Symbol;Acc:3073]	0.691775	4.57193	35.5208	2.52346e-09	3.05013e-08
ENSG00000162244	RPL29	ribosomal protein L29 [Source:HGNC Symbol;Acc:10331]	0.380486	8.66862	35.5195	2.52512e-09	3.05013e-08
ENSG00000177565	TBL1XR1	transducin (beta)-like 1 X-linked receptor 1 [Source:HGNC Symbol;Acc:29529]	-0.373795	7.82289	35.5158	2.52987e-09	3.05337e-08
ENSG00000077254	USP33	ubiquitin specific peptidase 33 [Source:HGNC Symbol;Acc:20059]	-0.36054	7.83209	35.5133	2.53311e-09	3.05479e-08
ENSG00000152127	MGAT5	mannosyl (alpha-1,6-)-glycoprotein beta-1,6-N-acetyl-glucosaminyltransferase [Source:HGNC Symbol;Acc:7049]	0.412392	6.67911	35.4619	2.60084e-09	3.13392e-08
ENSG00000198478	SH3BGRL2	SH3 domain binding glutamic acid-rich protein like 2 [Source:HGNC Symbol;Acc:15567]	0.646736	4.74964	35.4307	2.64289e-09	3.182e-08
ENSG00000100889	PCK2	phosphoenolpyruvate carboxykinase 2 (mitochondrial) [Source:HGNC Symbol;Acc:8725]	1.01609	3.15451	35.326	2.78882e-09	3.35496e-08
ENSG00000110917	MLEC	malectin [Source:HGNC Symbol;Acc:28973]	0.35319	7.87027	35.3204	2.79685e-09	3.3619e-08
ENSG00000006652	IFRD1	interferon-related developmental regulator 1 [Source:HGNC Symbol;Acc:5456]	0.400151	6.85279	35.3183	2.79996e-09	3.3629e-08
ENSG00000165312	OTUD1	OTU domain containing 1 [Source:HGNC Symbol;Acc:27346]	-1.70789	0.701342	35.2608	2.88381e-09	3.4608e-08
ENSG00000086065	CHMP5	charged multivesicular body protein 5 [Source:HGNC Symbol;Acc:26942]	-0.447647	6.46066	35.2112	2.95821e-09	3.54721e-08
ENSG00000158864	NDUFS2	NADH dehydrogenase (ubiquinone) Fe-S protein 2, 49kDa (NADH-coenzyme Q reductase) [Source:HGNC Symbol;Acc:7708]	-0.369101	7.48085	35.1869	2.99534e-09	3.58883e-08
ENSG00000103187	COTL1	coactosin-like 1 (Dictyostelium) [Source:HGNC Symbol;Acc:18304]	0.92606	2.79658	35.1844	2.99919e-09	3.59054e-08
ENSG00000152767	FARP1	FERM, RhoGEF (ARHGEF) and pleckstrin domain protein 1 (chondrocyte-derived) [Source:HGNC Symbol;Acc:3591]	-0.449083	6.24383	35.1672	3.02573e-09	3.61938e-08
ENSG00000087074	PPP1R15A	protein phosphatase 1, regulatory subunit 15A [Source:HGNC Symbol;Acc:14375]	-0.708012	4.41803	35.161	3.03541e-09	3.62804e-08
ENSG00000197467	COL13A1	collagen, type XIII, alpha 1 [Source:HGNC Symbol;Acc:2190]	-1.34949	1.2157	35.1546	3.04539e-09	3.63703e-08
ENSG00000142507	PSMB6	proteasome (prosome, macropain) subunit, beta type, 6 [Source:HGNC Symbol;Acc:9543]	-0.45723	6.33106	35.1466	3.05799e-09	3.64914e-08
ENSG00000102316	MAGED2	melanoma antigen family D, 2 [Source:HGNC Symbol;Acc:16353]	-0.431028	6.53642	35.123	3.09522e-09	3.69059e-08
ENSG00000117448	AKR1A1	aldo-keto reductase family 1, member A1 (aldehyde reductase) [Source:HGNC Symbol;Acc:380]	0.431148	6.2505	35.0818	3.16139e-09	3.76645e-08
ENSG00000176994	SMCR8	Smith-Magenis syndrome chromosome region, candidate 8 [Source:HGNC Symbol;Acc:17921]	0.587175	5.44509	35.0787	3.16646e-09	3.76946e-08
ENSG00000005022	SLC25A5	solute carrier family 25 (mitochondrial carrier; adenine nucleotide translocator), member 5 [Source:HGNC Symbol;Acc:10991]	0.367323	7.6467	35.0697	3.18104e-09	3.78095e-08
ENSG00000124702	KLHDC3	kelch domain containing 3 [Source:HGNC Symbol;Acc:20704]	-0.475055	6.10502	35.0696	3.18122e-09	3.78095e-08
ENSG00000156471	PTDSS1	phosphatidylserine synthase 1 [Source:HGNC Symbol;Acc:9587]	0.391645	6.85015	35.0567	3.20237e-09	3.80304e-08
ENSG00000125170	DOK4	docking protein 4 [Source:HGNC Symbol;Acc:19868]	-0.652692	5.2171	35.0525	3.20929e-09	3.8082e-08
ENSG00000138095	LRPPRC	leucine-rich pentatricopeptide repeat containing [Source:HGNC Symbol;Acc:15714]	0.336328	9.19676	35.0367	3.23548e-09	3.83621e-08
ENSG00000124374	PAIP2B	poly(A) binding protein interacting protein 2B [Source:HGNC Symbol;Acc:29200]	-0.864484	3.24013	35.0234	3.2577e-09	3.85947e-08
ENSG00000117519	CNN3	calponin 3, acidic [Source:HGNC Symbol;Acc:2157]	-0.346668	8.63461	35.0081	3.28339e-09	3.88679e-08
ENSG00000114030	KPNA1	karyopherin alpha 1 (importin alpha 5) [Source:HGNC Symbol;Acc:6394]	-0.381536	7.03189	34.9965	3.30298e-09	3.90685e-08
ENSG00000004478	FKBP4	FK506 binding protein 4, 59kDa [Source:HGNC Symbol;Acc:3720]	0.388749	8.06507	34.9909	3.31244e-09	3.91492e-08
ENSG00000078142	PIK3C3	phosphatidylinositol 3-kinase, catalytic subunit type 3 [Source:HGNC Symbol;Acc:8974]	-0.388978	7.02305	34.8362	3.58634e-09	4.23526e-08
ENSG00000137274	BPHL	biphenyl hydrolase-like (serine hydrolase) [Source:HGNC Symbol;Acc:1094]	-0.787242	3.51191	34.8311	3.59578e-09	4.24302e-08
ENSG00000139687	RB1	retinoblastoma 1 [Source:HGNC Symbol;Acc:9884]	-0.383375	7.46539	34.7936	3.66582e-09	4.32222e-08
ENSG00000087460	GNAS	GNAS complex locus [Source:HGNC Symbol;Acc:4392]	-0.304989	10.3367	34.7299	3.78766e-09	4.46233e-08
ENSG00000187325	TAF9B	TAF9B RNA polymerase II, TATA box binding protein (TBP)-associated factor, 31kDa [Source:HGNC Symbol;Acc:17306]	-0.529992	5.548	34.724	3.79923e-09	4.4724e-08
ENSG00000171055	FEZ2	fasciculation and elongation protein zeta 2 (zygin II) [Source:HGNC Symbol;Acc:3660]	-0.620139	4.76629	34.6777	3.89064e-09	4.57637e-08
ENSG00000176273	SLC35G1	solute carrier family 35, member G1 [Source:HGNC Symbol;Acc:26607]	-0.624263	5.06682	34.6464	3.95367e-09	4.64681e-08
ENSG00000188211	NCR3LG1	natural killer cell cytotoxicity receptor 3 ligand 1 [Source:HGNC Symbol;Acc:42400]	0.462782	5.98913	34.6286	3.98998e-09	4.68577e-08
ENSG00000079332	SAR1A	SAR1 homolog A (S. cerevisiae) [Source:HGNC Symbol;Acc:10534]	-0.371803	7.23435	34.6137	4.02068e-09	4.71808e-08
ENSG00000235217	TSPY26P	testis specific protein, Y-linked 26, pseudogene [Source:HGNC Symbol;Acc:16256]	-1.02631	2.77382	34.6088	4.0307e-09	4.7261e-08
ENSG00000124098	FAM210B	family with sequence similarity 210, member B [Source:HGNC Symbol;Acc:16102]	-0.702148	4.06456	34.5906	4.06874e-09	4.76693e-08
ENSG00000261716	RP11-196G18.22		0.553002	5.89199	34.5687	4.11475e-09	4.81305e-08
ENSG00000171792	RHNO1	RAD9-HUS1-RAD1 interacting nuclear orphan 1 [Source:HGNC Symbol;Acc:28206]	-0.530559	5.33139	34.5678	4.11656e-09	4.81305e-08
ENSG00000189403	HMGB1	high mobility group box 1 [Source:HGNC Symbol;Acc:4983]	-0.314246	10.038	34.5672	4.11786e-09	4.81305e-08
ENSG00000111664	GNB3	guanine nucleotide binding protein (G protein), beta polypeptide 3 [Source:HGNC Symbol;Acc:4400]	1.12234	2.33743	34.5387	4.17862e-09	4.88022e-08
ENSG00000109472	CPE	carboxypeptidase E [Source:HGNC Symbol;Acc:2303]	0.396843	6.98664	34.5341	4.18859e-09	4.88801e-08
ENSG00000198961	PJA2	praja ring finger 2, E3 ubiquitin protein ligase [Source:HGNC Symbol;Acc:17481]	-0.366762	7.31153	34.5169	4.22562e-09	4.92734e-08
ENSG00000252197	-	A)	-0.799939	3.66239	34.4796	4.3075e-09	5.01887e-08
ENSG00000179008	C14orf39	chromosome 14 open reading frame 39 [Source:HGNC Symbol;Acc:19849]	-1.01909	2.75802	34.4743	4.31926e-09	5.02631e-08
ENSG00000169213	RAB3B	RAB3B, member RAS oncogene family [Source:HGNC Symbol;Acc:9778]	-0.606693	4.79865	34.4736	4.32068e-09	5.02631e-08
ENSG00000204386	NEU1	sialidase 1 (lysosomal sialidase) [Source:HGNC Symbol;Acc:7758]	0.597804	5.22442	34.4532	4.36626e-09	5.07535e-08
ENSG00000176105	YES1	v-yes-1 Yamaguchi sarcoma viral oncogene homolog 1 [Source:HGNC Symbol;Acc:12841]	-0.414693	7.40945	34.4381	4.40022e-09	5.11081e-08
ENSG00000107537	PHYH	phytanoyl-CoA 2-hydroxylase [Source:HGNC Symbol;Acc:8940]	-0.755666	3.88371	34.4236	4.43316e-09	5.14504e-08
ENSG00000163577	EIF5A2	eukaryotic translation initiation factor 5A2 [Source:HGNC Symbol;Acc:3301]	0.684966	4.18518	34.3822	4.52854e-09	5.25162e-08
ENSG00000106333	PCOLCE	procollagen C-endopeptidase enhancer [Source:HGNC Symbol;Acc:8738]	0.961234	3.9089	34.3557	4.59043e-09	5.31923e-08
ENSG00000198837	DENND4B	DENN/MADD domain containing 4B [Source:HGNC Symbol;Acc:29044]	0.483442	7.42695	34.3217	4.67138e-09	5.4088e-08
ENSG00000188107	EYS	eyes shut homolog (Drosophila) [Source:HGNC Symbol;Acc:21555]	0.823122	3.55353	34.3201	4.67527e-09	5.40907e-08
ENSG00000110315	RNF141	ring finger protein 141 [Source:HGNC Symbol;Acc:21159]	-0.546408	5.46048	34.3181	4.68018e-09	5.41052e-08
ENSG00000102804	TSC22D1	TSC22 domain family, member 1 [Source:HGNC Symbol;Acc:16826]	0.377571	7.15788	34.3064	4.70837e-09	5.43596e-08
ENSG00000144118	RALB	v-ral simian leukemia viral oncogene homolog B (ras related; GTP binding protein) [Source:HGNC Symbol;Acc:9840]	-0.658936	4.54221	34.3059	4.70952e-09	5.43596e-08
ENSG00000184564	SLITRK6	SLIT and NTRK-like family, member 6 [Source:HGNC Symbol;Acc:23503]	-0.709214	4.18699	34.2613	4.81868e-09	5.55762e-08
ENSG00000136485	DCAF7	DDB1 and CUL4 associated factor 7 [Source:HGNC Symbol;Acc:30915]	-0.303087	9.3404	34.2553	4.83359e-09	5.57048e-08
ENSG00000163513	TGFBR2	transforming growth factor, beta receptor II (70/80kDa) [Source:HGNC Symbol;Acc:11773]	-2.20195	0.309307	34.2082	4.95188e-09	5.70236e-08
ENSG00000111269	CREBL2	cAMP responsive element binding protein-like 2 [Source:HGNC Symbol;Acc:2350]	-0.526674	5.39651	34.1953	4.9849e-09	5.73593e-08
ENSG00000152953	STK32B	serine/threonine kinase 32B [Source:HGNC Symbol;Acc:14217]	-1.26912	1.93676	34.1359	5.13942e-09	5.90914e-08
ENSG00000146242	TPBG	trophoblast glycoprotein [Source:HGNC Symbol;Acc:12004]	1.22336	2.05493	34.0493	5.37319e-09	6.17312e-08
ENSG00000162669	HFM1	HFM1, ATP-dependent DNA helicase homolog (S. cerevisiae) [Source:HGNC Symbol;Acc:20193]	-0.927706	3.19059	34.0284	5.4314e-09	6.23516e-08
ENSG00000100764	PSMC1	proteasome (prosome, macropain) 26S subunit, ATPase, 1 [Source:HGNC Symbol;Acc:9547]	-0.399044	7.06508	34.0137	5.47244e-09	6.27741e-08
ENSG00000187678	SPRY4	sprouty homolog 4 (Drosophila) [Source:HGNC Symbol;Acc:15533]	-1.94707	2.15659	33.965	5.61121e-09	6.43161e-08
ENSG00000155660	PDIA4	protein disulfide isomerase family A, member 4 [Source:HGNC Symbol;Acc:30167]	0.409756	7.09729	33.9635	5.61563e-09	6.4317e-08
ENSG00000153395	LPCAT1	lysophosphatidylcholine acyltransferase 1 [Source:HGNC Symbol;Acc:25718]	0.453312	5.98577	33.9341	5.70105e-09	6.52448e-08
ENSG00000134419	RPS15A	ribosomal protein S15a [Source:HGNC Symbol;Acc:10389]	0.359449	7.39176	33.9081	5.77776e-09	6.60717e-08
ENSG00000177595	PIDD	p53-induced death domain protein [Source:HGNC Symbol;Acc:16491]	0.906651	4.23416	33.8854	5.84558e-09	6.67957e-08
ENSG00000111602	TIMELESS	timeless homolog (Drosophila) [Source:HGNC Symbol;Acc:11813]	-0.384936	7.47612	33.8827	5.85372e-09	6.68372e-08
ENSG00000228158	TLE1P1	transducin-like enhancer of split 1 pseudogene 1 [Source:HGNC Symbol;Acc:39438]	1.92175	0.551124	33.8594	5.92412e-09	6.75888e-08
ENSG00000129116	PALLD	palladin, cytoskeletal associated protein [Source:HGNC Symbol;Acc:17068]	-0.46473	6.04249	33.8552	5.93691e-09	6.76826e-08
ENSG00000180694	TMEM64	transmembrane protein 64 [Source:HGNC Symbol;Acc:25441]	-0.496232	5.7629	33.8486	5.95727e-09	6.78624e-08
ENSG00000165061	ZMAT4	zinc finger, matrin-type 4 [Source:HGNC Symbol;Acc:25844]	-1.47547	1.24146	33.7793	6.17321e-09	7.02249e-08
ENSG00000154678	PDE1C	phosphodiesterase 1C, calmodulin-dependent 70kDa [Source:HGNC Symbol;Acc:8776]	-0.912205	2.93229	33.779	6.17414e-09	7.02249e-08
ENSG00000166681	NGFRAP1	nerve growth factor receptor (TNFRSF16) associated protein 1 [Source:HGNC Symbol;Acc:13388]	-0.340819	7.77912	33.7748	6.1876e-09	7.0324e-08
ENSG00000255571	CTD-2335A18.1		0.746551	3.74666	33.5199	7.05372e-09	8.01062e-08
ENSG00000132522	GPS2	G protein pathway suppressor 2 [Source:HGNC Symbol;Acc:4550]	0.500606	5.55742	33.5156	7.06949e-09	8.02238e-08
ENSG00000072657	TRHDE	thyrotropin-releasing hormone degrading enzyme [Source:HGNC Symbol;Acc:30748]	-1.0835	2.25045	33.4954	7.14324e-09	8.09986e-08
ENSG00000067057	PFKP	phosphofructokinase, platelet [Source:HGNC Symbol;Acc:8878]	0.44571	6.32171	33.4894	7.16543e-09	8.11881e-08
ENSG00000165323	FAT3	FAT tumor suppressor homolog 3 (Drosophila) [Source:HGNC Symbol;Acc:23112]	1.17567	1.73566	33.4824	7.19117e-09	8.1367e-08
ENSG00000144891	AGTR1	angiotensin II receptor, type 1 [Source:HGNC Symbol;Acc:336]	-1.29722	1.63561	33.4821	7.19221e-09	8.1367e-08
ENSG00000185624	P4HB	prolyl 4-hydroxylase, beta polypeptide [Source:HGNC Symbol;Acc:8548]	0.383502	8.58526	33.4496	7.3136e-09	8.26772e-08
ENSG00000170271	C5orf4	chromosome 5 open reading frame 4 [Source:HGNC Symbol;Acc:1334]	-1.61543	1.45308	33.4275	7.39689e-09	8.3555e-08
ENSG00000105329	TGFB1	transforming growth factor, beta 1 [Source:HGNC Symbol;Acc:11766]	-0.890105	3.04332	33.3956	7.51949e-09	8.48751e-08
ENSG00000134013	LOXL2	lysyl oxidase-like 2 [Source:HGNC Symbol;Acc:6666]	-0.979402	2.59732	33.3924	7.5319e-09	8.49504e-08
ENSG00000144566	RAB5A	RAB5A, member RAS oncogene family [Source:HGNC Symbol;Acc:9783]	-0.516991	5.44903	33.3844	7.56284e-09	8.52344e-08
ENSG00000081138	CDH7	cadherin 7, type 2 [Source:HGNC Symbol;Acc:1766]	0.664716	4.72331	33.3725	7.6094e-09	8.5694e-08
ENSG00000215154	AC141586.5		0.620425	4.83726	33.3648	7.63951e-09	8.59246e-08
ENSG00000157851	DPYSL5	dihydropyrimidinase-like 5 [Source:HGNC Symbol;Acc:20637]	0.445237	6.52847	33.3643	7.64148e-09	8.59246e-08
ENSG00000053108	FSTL4	follistatin-like 4 [Source:HGNC Symbol;Acc:21389]	-1.13614	2.54044	33.3597	7.65947e-09	8.60615e-08
ENSG00000114439	BBX	bobby sox homolog (Drosophila) [Source:HGNC Symbol;Acc:14422]	-0.416652	6.21399	33.3516	7.69153e-09	8.63562e-08
ENSG00000115216	NRBP1	nuclear receptor binding protein 1 [Source:HGNC Symbol;Acc:7993]	0.445233	6.21625	33.3249	7.79769e-09	8.74818e-08
ENSG00000104408	EIF3E	eukaryotic translation initiation factor 3, subunit E [Source:HGNC Symbol;Acc:3277]	0.339373	9.11336	33.2451	8.12457e-09	9.10801e-08
ENSG00000175662	TOM1L2	target of myb1-like 2 (chicken) [Source:HGNC Symbol;Acc:11984]	-0.95555	2.94676	33.2381	8.15379e-09	9.13384e-08
ENSG00000104872	PIH1D1	PIH1 domain containing 1 [Source:HGNC Symbol;Acc:26075]	-0.561497	5.53435	33.184	8.38392e-09	9.38454e-08
ENSG00000186468	RPS23	ribosomal protein S23 [Source:HGNC Symbol;Acc:10410]	0.302028	9.24775	33.1613	8.48207e-09	9.48724e-08
ENSG00000132471	WBP2	WW domain binding protein 2 [Source:HGNC Symbol;Acc:12738]	-0.57614	5.41971	33.1586	8.49417e-09	9.4936e-08
ENSG00000176749	CDK5R1	cyclin-dependent kinase 5, regulatory subunit 1 (p35) [Source:HGNC Symbol;Acc:1775]	0.551512	5.31243	33.1385	8.58232e-09	9.58489e-08
ENSG00000230873	RP3-486B10.1	uncharacterized protein LOC401236 [Source:RefSeq peptide;Acc:NP_001177695]	1.68038	1.13952	33.1363	8.59188e-09	9.58833e-08
ENSG00000141384	TAF4B	TAF4b RNA polymerase II, TATA box binding protein (TBP)-associated factor, 105kDa [Source:HGNC Symbol;Acc:11538]	-0.653557	4.2196	33.1192	8.66768e-09	9.66564e-08
ENSG00000137642	SORL1	sortilin-related receptor, L(DLR class) A repeats containing [Source:HGNC Symbol;Acc:11185]	-0.883702	3.15438	33.0833	8.82952e-09	9.8387e-08
ENSG00000214535	RPS15AP1	ribosomal protein S15a pseudogene 1 [Source:HGNC Symbol;Acc:16598]	0.412682	6.35249	33.0715	8.88324e-09	9.89113e-08
ENSG00000169683	LRRC45	leucine rich repeat containing 45 [Source:HGNC Symbol;Acc:28302]	0.86063	4.08519	33.0206	9.11881e-09	1.01458e-07
ENSG00000168495	POLR3D	polymerase (RNA) III (DNA directed) polypeptide D, 44kDa [Source:HGNC Symbol;Acc:1080]	0.448534	6.2256	33.0015	9.20883e-09	1.02383e-07
ENSG00000121064	SCPEP1	serine carboxypeptidase 1 [Source:HGNC Symbol;Acc:29507]	-0.471783	5.83134	32.9862	9.28151e-09	1.03113e-07
ENSG00000133740	E2F5	E2F transcription factor 5, p130-binding [Source:HGNC Symbol;Acc:3119]	0.489937	5.84768	32.9587	9.41399e-09	1.04507e-07
ENSG00000225733	FGD5-AS1	FGD5 antisense RNA 1 [Source:HGNC Symbol;Acc:40410]	-0.343482	7.756	32.9423	9.49367e-09	1.05312e-07
ENSG00000197008	ZNF138	zinc finger protein 138 [Source:HGNC Symbol;Acc:12922]	0.573348	4.98122	32.9335	9.53636e-09	1.05707e-07
ENSG00000090238	YPEL3	yippee-like 3 (Drosophila) [Source:HGNC Symbol;Acc:18327]	-1.68929	1.22113	32.9274	9.56668e-09	1.05963e-07
ENSG00000082068	WDR70	WD repeat domain 70 [Source:HGNC Symbol;Acc:25495]	-0.535833	5.29502	32.9089	9.65782e-09	1.06893e-07
ENSG00000104980	TIMM44	translocase of inner mitochondrial membrane 44 homolog (yeast) [Source:HGNC Symbol;Acc:17316]	0.565921	5.46321	32.9041	9.68208e-09	1.07081e-07
ENSG00000185291	IL3RA	interleukin 3 receptor, alpha (low affinity) [Source:HGNC Symbol;Acc:6012]	1.34437	1.72993	32.8932	9.73652e-09	1.07603e-07
ENSG00000239305	RNF103	ring finger protein 103 [Source:HGNC Symbol;Acc:12859]	-0.806654	3.48964	32.8805	9.80011e-09	1.08225e-07
ENSG00000228451	SDAD1P1	SDA1 domain containing 1 pseudogene 1 [Source:HGNC Symbol;Acc:31403]	-1.39585	1.54396	32.8268	1.00745e-08	1.11172e-07
ENSG00000151553	FAM160B1	family with sequence similarity 160, member B1 [Source:HGNC Symbol;Acc:29320]	-0.617296	5.0039	32.7727	1.03588e-08	1.14225e-07
ENSG00000148468	FAM171A1	family with sequence similarity 171, member A1 [Source:HGNC Symbol;Acc:23522]	-0.360747	7.2855	32.6511	1.10278e-08	1.21511e-07
ENSG00000149313	AASDHPPT	aminoadipate-semialdehyde dehydrogenase-phosphopantetheinyl transferase [Source:HGNC Symbol;Acc:14235]	-0.417196	6.87124	32.6173	1.12214e-08	1.23552e-07
ENSG00000131507	NDFIP1	Nedd4 family interacting protein 1 [Source:HGNC Symbol;Acc:17592]	-0.442877	6.40595	32.6085	1.12718e-08	1.24015e-07
ENSG00000198056	PRIM1	primase, DNA, polypeptide 1 (49kDa) [Source:HGNC Symbol;Acc:9369]	-0.535381	5.42394	32.5996	1.13239e-08	1.24441e-07
ENSG00000128165	ADM2	adrenomedullin 2 [Source:HGNC Symbol;Acc:28898]	1.26619	2.08211	32.599	1.13274e-08	1.24441e-07
ENSG00000137478	FCHSD2	FCH and double SH3 domains 2 [Source:HGNC Symbol;Acc:29114]	-0.515114	5.20888	32.552	1.16045e-08	1.27391e-07
ENSG00000142197	DOPEY2	dopey family member 2 [Source:HGNC Symbol;Acc:1291]	-0.752273	3.57869	32.5157	1.18236e-08	1.29701e-07
ENSG00000145920	CPLX2	complexin 2 [Source:HGNC Symbol;Acc:2310]	-0.38738	7.92602	32.4964	1.19416e-08	1.30898e-07
ENSG00000196950	SLC39A10	solute carrier family 39 (zinc transporter), member 10 [Source:HGNC Symbol;Acc:20861]	-0.375426	7.20376	32.488	1.1993e-08	1.31364e-07
ENSG00000179632	MAF1	MAF1 homolog (S. cerevisiae) [Source:HGNC Symbol;Acc:24966]	-0.647852	4.84157	32.4856	1.20078e-08	1.3143e-07
ENSG00000126561	STAT5A	signal transducer and activator of transcription 5A [Source:HGNC Symbol;Acc:11366]	0.648515	4.69533	32.429	1.23625e-08	1.35114e-07
ENSG00000147676	MAL2	mal, T-cell differentiation protein 2 (gene/pseudogene) [Source:HGNC Symbol;Acc:13634]	2.2034	0.227449	32.429	1.23627e-08	1.35114e-07
ENSG00000175352	NRIP3	nuclear receptor interacting protein 3 [Source:HGNC Symbol;Acc:1167]	-1.69063	1.23028	32.4213	1.24121e-08	1.35554e-07
ENSG00000174348	PODN	podocan [Source:HGNC Symbol;Acc:23174]	-2.11001	0.413888	32.4186	1.2429e-08	1.35639e-07
ENSG00000132376	INPP5K	inositol polyphosphate-5-phosphatase K [Source:HGNC Symbol;Acc:33882]	-0.734709	3.94477	32.4079	1.24977e-08	1.36288e-07
ENSG00000185610	DBX2	developing brain homeobox 2 [Source:HGNC Symbol;Acc:33186]	-2.12133	0.418908	32.3902	1.26118e-08	1.3743e-07
ENSG00000166033	HTRA1	HtrA serine peptidase 1 [Source:HGNC Symbol;Acc:9476]	-0.87264	3.1344	32.3615	1.27997e-08	1.39375e-07
ENSG00000105849	TWISTNB	TWIST neighbor [Source:HGNC Symbol;Acc:18027]	0.408806	6.46166	32.301	1.32045e-08	1.43677e-07
ENSG00000198075	SULT1C4	sulfotransferase family, cytosolic, 1C, member 4 [Source:HGNC Symbol;Acc:11457]	-0.532745	5.58643	32.299	1.32182e-08	1.43721e-07
ENSG00000143630	HCN3	hyperpolarization activated cyclic nucleotide-gated potassium channel 3 [Source:HGNC Symbol;Acc:19183]	0.628374	4.94026	32.2949	1.32462e-08	1.4392e-07
ENSG00000115548	KDM3A	lysine (K)-specific demethylase 3A [Source:HGNC Symbol;Acc:20815]	-0.400159	6.61999	32.2033	1.38852e-08	1.50752e-07
ENSG00000143418	CERS2	ceramide synthase 2 [Source:HGNC Symbol;Acc:14076]	0.345631	8.10257	32.1949	1.39453e-08	1.51294e-07
ENSG00000100100	PIK3IP1	phosphoinositide-3-kinase interacting protein 1 [Source:HGNC Symbol;Acc:24942]	-1.38924	1.19613	32.189	1.39877e-08	1.51643e-07
ENSG00000122299	ZC3H7A	zinc finger CCCH-type containing 7A [Source:HGNC Symbol;Acc:30959]	-0.427477	6.67897	32.1539	1.42428e-08	1.54295e-07
ENSG00000117133	RPF1	ribosome production factor 1 homolog (S. cerevisiae) [Source:HGNC Symbol;Acc:30350]	-0.397626	6.63042	32.117	1.45163e-08	1.57143e-07
ENSG00000131002	TXLNG2P	taxilin gamma 2, pseudogene [Source:HGNC Symbol;Acc:18473]	0.446751	6.00639	32.099	1.46515e-08	1.58491e-07
ENSG00000107957	SH3PXD2A	SH3 and PX domains 2A [Source:HGNC Symbol;Acc:23664]	-0.404665	6.8935	32.0719	1.4857e-08	1.60596e-07
ENSG00000136158	SPRY2	sprouty homolog 2 (Drosophila) [Source:HGNC Symbol;Acc:11270]	-1.26574	2.47236	32.0266	1.52074e-08	1.64264e-07
ENSG00000113971	NPHP3	nephronophthisis 3 (adolescent) [Source:HGNC Symbol;Acc:7907]	-0.573403	4.80575	32.0224	1.52403e-08	1.645e-07
ENSG00000164818	HEATR2	HEAT repeat containing 2 [Source:HGNC Symbol;Acc:26013]	0.472066	5.84484	31.9946	1.546e-08	1.66749e-07
ENSG00000197024	ZNF398	zinc finger protein 398 [Source:HGNC Symbol;Acc:18373]	0.471467	5.78844	31.9875	1.55171e-08	1.67243e-07
ENSG00000169504	CLIC4	chloride intracellular channel 4 [Source:HGNC Symbol;Acc:13518]	0.340449	8.07642	31.9633	1.5711e-08	1.6921e-07
ENSG00000173757	STAT5B	signal transducer and activator of transcription 5B [Source:HGNC Symbol;Acc:11367]	-0.393148	6.46901	31.9571	1.57617e-08	1.69633e-07
ENSG00000138658	C4orf21	chromosome 4 open reading frame 21 [Source:HGNC Symbol;Acc:25654]	-0.45084	5.97976	31.9503	1.58171e-08	1.70105e-07
ENSG00000059588	TARBP1	TAR (HIV-1) RNA binding protein 1 [Source:HGNC Symbol;Acc:11568]	-0.469662	6.51492	31.9451	1.58594e-08	1.70436e-07
ENSG00000109046	WSB1	WD repeat and SOCS box containing 1 [Source:HGNC Symbol;Acc:19221]	-0.377491	7.20256	31.9335	1.59545e-08	1.71335e-07
ENSG00000099994	SUSD2	sushi domain containing 2 [Source:HGNC Symbol;Acc:30667]	-1.42842	1.24025	31.8988	1.62418e-08	1.74293e-07
ENSG00000215417	MIR17HG	miR-17-92 cluster host gene (non-protein coding) [Source:HGNC Symbol;Acc:23564]	-0.845954	3.23565	31.8807	1.63936e-08	1.75795e-07
ENSG00000189067	LITAF	lipopolysaccharide-induced TNF factor [Source:HGNC Symbol;Acc:16841]	-0.839081	3.46005	31.8534	1.66257e-08	1.78155e-07
ENSG00000225210	AL589743.1		-0.569433	5.44036	31.8412	1.67303e-08	1.79146e-07
ENSG00000163590	PPM1L	protein phosphatase, Mg2+/Mn2+ dependent, 1L [Source:HGNC Symbol;Acc:16381]	0.479478	5.55725	31.8151	1.69573e-08	1.81445e-07
ENSG00000145715	RASA1	RAS p21 protein activator (GTPase activating protein) 1 [Source:HGNC Symbol;Acc:9871]	-0.48281	5.61613	31.7999	1.70899e-08	1.82732e-07
ENSG00000125848	FLRT3	fibronectin leucine rich transmembrane protein 3 [Source:HGNC Symbol;Acc:3762]	-0.403468	6.35533	31.787	1.72045e-08	1.83825e-07
ENSG00000137288	MNF1	mitochondrial nucleoid factor 1 [Source:HGNC Symbol;Acc:21237]	-0.612133	4.63574	31.7363	1.76594e-08	1.8855e-07
ENSG00000142168	SOD1	superoxide dismutase 1, soluble [Source:HGNC Symbol;Acc:11179]	-0.322368	8.10781	31.7181	1.78256e-08	1.90187e-07
ENSG00000230551	CTB-89H12.4		-0.518707	5.43605	31.7086	1.79126e-08	1.90977e-07
ENSG00000108018	SORCS1	sortilin-related VPS10 domain containing receptor 1 [Source:HGNC Symbol;Acc:16697]	-0.385469	6.60465	31.6676	1.82953e-08	1.94918e-07
ENSG00000087884	C11orf67	chromosome 11 open reading frame 67 [Source:HGNC Symbol;Acc:30205]	-0.96299	2.62533	31.6465	1.84946e-08	1.96899e-07
ENSG00000153982	GDPD1	glycerophosphodiester phosphodiesterase domain containing 1 [Source:HGNC Symbol;Acc:20883]	0.613079	4.6663	31.6421	1.85368e-08	1.97206e-07
ENSG00000177311	ZBTB38	zinc finger and BTB domain containing 38 [Source:HGNC Symbol;Acc:26636]	-0.981312	2.53103	31.6163	1.87847e-08	1.99701e-07
ENSG00000111731	KIAA0528	KIAA0528 [Source:HGNC Symbol;Acc:29062]	-0.43011	6.42415	31.607	1.88744e-08	2.0051e-07
ENSG00000260032	LINC00657	long intergenic non-protein coding RNA 657 [Source:HGNC Symbol;Acc:44311]	-0.319896	9.35648	31.5941	1.90007e-08	2.01707e-07
ENSG00000066777	ARFGEF1	ADP-ribosylation factor guanine nucleotide-exchange factor 1 (brefeldin A-inhibited) [Source:HGNC Symbol;Acc:15772]	-0.388836	6.68771	31.57	1.92375e-08	2.04075e-07
ENSG00000166436	TRIM66	tripartite motif containing 66 [Source:HGNC Symbol;Acc:29005]	1.03927	2.58021	31.5561	1.9376e-08	2.05396e-07
ENSG00000148158	SNX30	sorting nexin family member 30 [Source:HGNC Symbol;Acc:23685]	-0.422757	6.23346	31.5439	1.94981e-08	2.06544e-07
ENSG00000213390	ARHGAP19	Rho GTPase activating protein 19 [Source:HGNC Symbol;Acc:23724]	-0.400748	6.37705	31.5209	1.97301e-08	2.08851e-07
ENSG00000170142	UBE2E1	ubiquitin-conjugating enzyme E2E 1 [Source:HGNC Symbol;Acc:12477]	-0.380981	7.08898	31.5139	1.98018e-08	2.0935e-07
ENSG00000117748	RPA2	replication protein A2, 32kDa [Source:HGNC Symbol;Acc:10290]	-0.397603	6.79187	31.5135	1.98055e-08	2.0935e-07
ENSG00000125977	EIF2S2	eukaryotic translation initiation factor 2, subunit 2 beta, 38kDa [Source:HGNC Symbol;Acc:3266]	0.353783	7.08844	31.4085	2.09061e-08	2.20826e-07
ENSG00000171497	PPID	peptidylprolyl isomerase D [Source:HGNC Symbol;Acc:9257]	0.44321	6.95356	31.4056	2.09378e-08	2.21004e-07
ENSG00000143614	GATAD2B	GATA zinc finger domain containing 2B [Source:HGNC Symbol;Acc:30778]	-0.342969	7.82252	31.369	2.13359e-08	2.25045e-07
ENSG00000110066	SUV420H1	suppressor of variegation 4-20 homolog 1 (Drosophila) [Source:HGNC Symbol;Acc:24283]	-0.447609	6.12384	31.3646	2.13843e-08	2.25395e-07
ENSG00000136297	MMD2	monocyte to macrophage differentiation-associated 2 [Source:HGNC Symbol;Acc:30133]	-1.49765	1.13062	31.3573	2.14647e-08	2.26081e-07
ENSG00000198707	CEP290	centrosomal protein 290kDa [Source:HGNC Symbol;Acc:29021]	0.401193	6.34474	31.3542	2.14988e-08	2.2628e-07
ENSG00000105327	BBC3	BCL2 binding component 3 [Source:HGNC Symbol;Acc:17868]	-1.46196	1.88666	31.309	2.20059e-08	2.31453e-07
ENSG00000128609	NDUFA5	NADH dehydrogenase (ubiquinone) 1 alpha subcomplex, 5, 13kDa [Source:HGNC Symbol;Acc:7688]	-0.40767	6.74143	31.3057	2.20427e-08	2.31675e-07
ENSG00000137812	CASC5	cancer susceptibility candidate 5 [Source:HGNC Symbol;Acc:24054]	-0.381911	6.79572	31.2803	2.23335e-08	2.34566e-07
ENSG00000134899	ERCC5	excision repair cross-complementing rodent repair deficiency, complementation group 5 [Source:HGNC Symbol;Acc:3437]	-0.478318	5.81942	31.2737	2.241e-08	2.35202e-07
ENSG00000083799	CYLD	cylindromatosis (turban tumor syndrome) [Source:HGNC Symbol;Acc:2584]	-0.565107	4.85487	31.2716	2.24337e-08	2.35284e-07
ENSG00000132002	DNAJB1	DnaJ (Hsp40) homolog, subfamily B, member 1 [Source:HGNC Symbol;Acc:5270]	0.67129	6.83094	31.261	2.25571e-08	2.36411e-07
ENSG00000106789	CORO2A	coronin, actin binding protein, 2A [Source:HGNC Symbol;Acc:2255]	-1.29155	1.71821	31.2245	2.29847e-08	2.40722e-07
ENSG00000131323	TRAF3	TNF receptor-associated factor 3 [Source:HGNC Symbol;Acc:12033]	-0.484286	5.48545	31.1463	2.39293e-08	2.50437e-07
ENSG00000117650	NEK2	NIMA (never in mitosis gene a)-related kinase 2 [Source:HGNC Symbol;Acc:7745]	-0.457924	6.28597	31.1182	2.42785e-08	2.53912e-07
ENSG00000033011	ALG1	asparagine-linked glycosylation 1, beta-1,4-mannosyltransferase homolog (S. cerevisiae) [Source:HGNC Symbol;Acc:18294]	0.812189	3.48817	31.0934	2.45905e-08	2.56994e-07
ENSG00000105137	SYDE1	synapse defective 1, Rho GTPase, homolog 1 (C. elegans) [Source:HGNC Symbol;Acc:25824]	-0.861219	3.64026	31.0681	2.49128e-08	2.60179e-07
ENSG00000143995	MEIS1	Meis homeobox 1 [Source:HGNC Symbol;Acc:7000]	-0.371198	7.43636	31.0528	2.51107e-08	2.62061e-07
ENSG00000136824	SMC2	structural maintenance of chromosomes 2 [Source:HGNC Symbol;Acc:14011]	-0.357091	7.09353	31.0508	2.51363e-08	2.62144e-07
ENSG00000088305	DNMT3B	DNA (cytosine-5-)-methyltransferase 3 beta [Source:HGNC Symbol;Acc:2979]	-0.656402	4.07194	31.0284	2.54287e-08	2.65006e-07
ENSG00000185219	ZNF445	zinc finger protein 445 [Source:HGNC Symbol;Acc:21018]	-0.371508	6.80083	31.0193	2.55482e-08	2.66064e-07
ENSG00000077092	RARB	retinoic acid receptor, beta [Source:HGNC Symbol;Acc:9865]	1.73884	0.745937	31.0025	2.5769e-08	2.68175e-07
ENSG00000238206	RP11-472B18.2		-1.58629	0.669281	30.9951	2.58683e-08	2.69019e-07
ENSG00000007944	MYLIP	myosin regulatory light chain interacting protein [Source:HGNC Symbol;Acc:21155]	0.652863	4.13394	30.9587	2.63571e-08	2.73911e-07
ENSG00000124486	USP9X	ubiquitin specific peptidase 9, X-linked [Source:HGNC Symbol;Acc:12632]	-0.345121	7.40582	30.9535	2.64287e-08	2.74462e-07
ENSG00000204054	RP11-492E3.1		-1.02858	2.24074	30.9339	2.66969e-08	2.77053e-07
ENSG00000084207	GSTP1	glutathione S-transferase pi 1 [Source:HGNC Symbol;Acc:4638]	-0.41389	7.40906	30.9199	2.68907e-08	2.78868e-07
ENSG00000137133	HINT2	histidine triad nucleotide binding protein 2 [Source:HGNC Symbol;Acc:18344]	-0.743155	3.55083	30.9181	2.6915e-08	2.78926e-07
ENSG00000075275	CELSR1	cadherin, EGF LAG seven-pass G-type receptor 1 (flamingo homolog, Drosophila) [Source:HGNC Symbol;Acc:1850]	-0.640959	4.58729	30.9045	2.71039e-08	2.80686e-07
ENSG00000171724	VAT1L	vesicle amine transport protein 1 homolog (T. californica)-like [Source:HGNC Symbol;Acc:29315]	-1.07424	2.11145	30.8283	2.81894e-08	2.91724e-07
ENSG00000072134	EPN2	epsin 2 [Source:HGNC Symbol;Acc:18639]	-0.491137	5.54124	30.8227	2.82713e-08	2.92367e-07
ENSG00000153936	HS2ST1	heparan sulfate 2-O-sulfotransferase 1 [Source:HGNC Symbol;Acc:5193]	-0.349946	7.84325	30.8133	2.84091e-08	2.93587e-07
ENSG00000131844	MCCC2	methylcrotonoyl-CoA carboxylase 2 (beta) [Source:HGNC Symbol;Acc:6937]	-0.45824	5.93392	30.7942	2.86889e-08	2.96272e-07
ENSG00000173531	MST1	macrophage stimulating 1 (hepatocyte growth factor-like) [Source:HGNC Symbol;Acc:7380]	1.51817	1.75683	30.7689	2.90656e-08	2.99953e-07
ENSG00000227081	RP11-543P15.1		0.53282	5.35786	30.74	2.95016e-08	3.04241e-07
ENSG00000007968	E2F2	E2F transcription factor 2 [Source:HGNC Symbol;Acc:3114]	-0.797314	3.513	30.6839	3.03671e-08	3.12949e-07
ENSG00000164331	ANKRA2	ankyrin repeat, family A (RFXANK-like), 2 [Source:HGNC Symbol;Acc:13208]	-0.763145	3.7966	30.6534	3.0848e-08	3.17683e-07
ENSG00000156304	SCAF4	SR-related CTD-associated factor 4 [Source:HGNC Symbol;Acc:19304]	0.37054	6.82155	30.6475	3.09421e-08	3.1843e-07
ENSG00000055118	KCNH2	potassium voltage-gated channel, subfamily H (eag-related), member 2 [Source:HGNC Symbol;Acc:6251]	0.616239	5.4199	30.6397	3.10672e-08	3.19496e-07
ENSG00000112837	TBX18	T-box 18 [Source:HGNC Symbol;Acc:11595]	-0.947523	2.78948	30.6348	3.11458e-08	3.20081e-07
ENSG00000142534	RPS11	ribosomal protein S11 [Source:HGNC Symbol;Acc:10384]	0.30933	10.0477	30.6153	3.146e-08	3.23087e-07
ENSG00000153048	CARHSP1	calcium regulated heat stable protein 1, 24kDa [Source:HGNC Symbol;Acc:17150]	-0.489031	5.4099	30.6	3.17101e-08	3.2543e-07
ENSG00000109099	PMP22	peripheral myelin protein 22 [Source:HGNC Symbol;Acc:9118]	-0.709643	3.89438	30.5872	3.19199e-08	3.27356e-07
ENSG00000121753	BAI2	brain-specific angiogenesis inhibitor 2 [Source:HGNC Symbol;Acc:944]	0.651965	5.09993	30.5685	3.22282e-08	3.30289e-07
ENSG00000184792	OSBP2	oxysterol binding protein 2 [Source:HGNC Symbol;Acc:8504]	0.805691	3.34105	30.5243	3.29718e-08	3.37676e-07
ENSG00000163932	PRKCD	protein kinase C, delta [Source:HGNC Symbol;Acc:9399]	-1.74472	0.964005	30.5091	3.3231e-08	3.39848e-07
ENSG00000138279	ANXA7	annexin A7 [Source:HGNC Symbol;Acc:545]	-0.500123	5.31013	30.509	3.32326e-08	3.39848e-07
ENSG00000075461	CACNG4	calcium channel, voltage-dependent, gamma subunit 4 [Source:HGNC Symbol;Acc:1408]	-0.917165	3.18069	30.5078	3.32528e-08	3.39848e-07
ENSG00000181788	SIAH2	siah E3 ubiquitin protein ligase 2 [Source:HGNC Symbol;Acc:10858]	0.493218	5.54786	30.5034	3.33278e-08	3.4038e-07
ENSG00000171848	RRM2	ribonucleotide reductase M2 [Source:HGNC Symbol;Acc:10452]	-0.370505	8.26549	30.4968	3.3442e-08	3.41311e-07
ENSG00000104936	DMPK	dystrophia myotonica-protein kinase [Source:HGNC Symbol;Acc:2933]	0.756248	4.77543	30.4782	3.37636e-08	3.44356e-07
ENSG00000137872	SEMA6D	sema domain, transmembrane domain (TM), and cytoplasmic domain, (semaphorin) 6D [Source:HGNC Symbol;Acc:16770]	-0.421868	6.06114	30.4278	3.46519e-08	3.5309e-07
ENSG00000160221	C21orf33	chromosome 21 open reading frame 33 [Source:HGNC Symbol;Acc:1273]	-0.466888	5.56725	30.4264	3.46769e-08	3.5309e-07
ENSG00000188343	FAM92A1	family with sequence similarity 92, member A1 [Source:HGNC Symbol;Acc:30452]	0.472675	5.76822	30.4256	3.46915e-08	3.5309e-07
ENSG00000155189	AGPAT5	1-acylglycerol-3-phosphate O-acyltransferase 5 (lysophosphatidic acid acyltransferase, epsilon) [Source:HGNC Symbol;Acc:20886]	0.371516	6.91161	30.4089	3.49926e-08	3.5591e-07
ENSG00000123200	ZC3H13	zinc finger CCCH-type containing 13 [Source:HGNC Symbol;Acc:20368]	-0.324908	7.74576	30.4071	3.5025e-08	3.55995e-07
ENSG00000170396	ZNF804A	zinc finger protein 804A [Source:HGNC Symbol;Acc:21711]	-0.480894	5.33903	30.3654	3.57849e-08	3.63469e-07
ENSG00000174482	LINGO2	leucine rich repeat and Ig domain containing 2 [Source:HGNC Symbol;Acc:21207]	-1.29763	1.59841	30.3625	3.58396e-08	3.63776e-07
ENSG00000108439	PNPO	pyridoxamine 5'-phosphate oxidase [Source:HGNC Symbol;Acc:30260]	-0.614577	4.50832	30.2887	3.72282e-08	3.77611e-07
ENSG00000156802	ATAD2	ATPase family, AAA domain containing 2 [Source:HGNC Symbol;Acc:30123]	-0.346063	7.69155	30.229	3.83929e-08	3.89159e-07
ENSG00000163479	SSR2	signal sequence receptor, beta (translocon-associated protein beta) [Source:HGNC Symbol;Acc:11324]	0.312044	8.82567	30.2113	3.8745e-08	3.92459e-07
ENSG00000198804	MT-CO1	mitochondrially encoded cytochrome c oxidase I [Source:HGNC Symbol;Acc:7419]	0.240825	12.3794	30.2075	3.88205e-08	3.92954e-07
ENSG00000213741	RPS29	ribosomal protein S29 [Source:HGNC Symbol;Acc:10419]	0.341594	8.24465	30.2047	3.88761e-08	3.93249e-07
ENSG00000164588	HCN1	hyperpolarization activated cyclic nucleotide-gated potassium channel 1 [Source:HGNC Symbol;Acc:4845]	1.50648	1.1053	30.1837	3.92999e-08	3.97264e-07
ENSG00000104549	SQLE	squalene epoxidase [Source:HGNC Symbol;Acc:11279]	0.359932	7.67917	30.1365	4.02677e-08	4.0677e-07
ENSG00000260244	RP11-588K22.2		0.82077	3.88531	30.1345	4.03106e-08	4.06925e-07
ENSG00000131558	EXOC4	exocyst complex component 4 [Source:HGNC Symbol;Acc:30389]	-0.389136	6.39344	30.0949	4.11406e-08	4.15021e-07
ENSG00000146122	DAAM2	dishevelled associated activator of morphogenesis 2 [Source:HGNC Symbol;Acc:18143]	0.673271	4.18772	30.0539	4.20202e-08	4.23606e-07
ENSG00000105372	RPS19	ribosomal protein S19 [Source:HGNC Symbol;Acc:10402]	0.383047	9.01666	30.0516	4.20694e-08	4.23813e-07
ENSG00000167964	RAB26	RAB26, member RAS oncogene family [Source:HGNC Symbol;Acc:14259]	-1.22104	1.40428	30.0182	4.28002e-08	4.30882e-07
ENSG00000143367	TUFT1	tuftelin 1 [Source:HGNC Symbol;Acc:12422]	-0.720374	3.9074	29.9922	4.33795e-08	4.36418e-07
ENSG00000123636	BAZ2B	bromodomain adjacent to zinc finger domain, 2B [Source:HGNC Symbol;Acc:963]	-0.426424	5.93438	29.9748	4.37708e-08	4.40055e-07
ENSG00000183741	CBX6	chromobox homolog 6 [Source:HGNC Symbol;Acc:1556]	0.566111	5.42346	29.9471	4.44004e-08	4.45903e-07
ENSG00000143507	DUSP10	dual specificity phosphatase 10 [Source:HGNC Symbol;Acc:3065]	-1.07904	3.01581	29.9465	4.44126e-08	4.45903e-07
ENSG00000120756	PLS1	plastin 1 [Source:HGNC Symbol;Acc:9090]	0.605387	4.80789	29.9085	4.52932e-08	4.54435e-07
ENSG00000128342	LIF	leukemia inhibitory factor [Source:HGNC Symbol;Acc:6596]	1.91555	1.61014	29.9019	4.54472e-08	4.55672e-07
ENSG00000215325	ASS1P10	argininosuccinate synthetase 1 pseudogene 10 [Source:HGNC Symbol;Acc:760]	-1.80647	0.294845	29.8929	4.5658e-08	4.57476e-07
ENSG00000121900	TMEM54	transmembrane protein 54 [Source:HGNC Symbol;Acc:24143]	-0.89183	2.71858	29.8746	4.60912e-08	4.61504e-07
ENSG00000105204	DYRK1B	dual-specificity tyrosine-(Y)-phosphorylation regulated kinase 1B [Source:HGNC Symbol;Acc:3092]	-0.957349	2.73569	29.8061	4.77478e-08	4.77768e-07
ENSG00000179241	LDLRAD3	low density lipoprotein receptor class A domain containing 3 [Source:HGNC Symbol;Acc:27046]	-0.433692	6.08495	29.7665	4.87332e-08	4.87299e-07
ENSG00000031698	SARS	seryl-tRNA synthetase [Source:HGNC Symbol;Acc:10537]	0.324234	8.1255	29.7538	4.90552e-08	4.90188e-07
ENSG00000226754	RP5-1024G6.5		-1.00156	2.32927	29.743	4.93292e-08	4.92593e-07
ENSG00000180447	GAS1	growth arrest-specific 1 [Source:HGNC Symbol;Acc:4165]	-0.918779	2.83577	29.7161	5.00176e-08	4.98902e-07
ENSG00000100614	PPM1A	protein phosphatase, Mg2+/Mn2+ dependent, 1A [Source:HGNC Symbol;Acc:9275]	-0.430682	6.21868	29.7157	5.00284e-08	4.98902e-07
ENSG00000158516	CPA2	carboxypeptidase A2 (pancreatic) [Source:HGNC Symbol;Acc:2297]	1.90453	-0.124137	29.7033	5.03501e-08	5.01773e-07
ENSG00000118496	FBXO30	F-box protein 30 [Source:HGNC Symbol;Acc:15600]	-0.450813	6.12613	29.6949	5.05687e-08	5.03612e-07
ENSG00000165732	DDX21	DEAD (Asp-Glu-Ala-Asp) box helicase 21 [Source:HGNC Symbol;Acc:2744]	0.293558	9.30891	29.6757	5.10718e-08	5.08281e-07
ENSG00000109586	GALNT7	UDP-N-acetyl-alpha-D-galactosamine:polypeptide N-acetylgalactosaminyltransferase 7 (GalNAc-T7) [Source:HGNC Symbol;Acc:4129]	-0.460078	5.74848	29.6611	5.14575e-08	5.11776e-07
ENSG00000140479	PCSK6	proprotein convertase subtilisin/kexin type 6 [Source:HGNC Symbol;Acc:8569]	-0.588773	4.91284	29.6349	5.21576e-08	5.1839e-07
ENSG00000248015	AC005329.7		1.13056	2.13849	29.5932	5.32924e-08	5.29011e-07
ENSG00000197714	ZNF460	zinc finger protein 460 [Source:HGNC Symbol;Acc:21628]	1.24142	1.79873	29.593	5.32976e-08	5.29011e-07
ENSG00000088854	C20orf194	chromosome 20 open reading frame 194 [Source:HGNC Symbol;Acc:17721]	-0.571695	4.91477	29.5707	5.39144e-08	5.34774e-07
ENSG00000173821	RNF213	ring finger protein 213 [Source:HGNC Symbol;Acc:14539]	-0.409245	6.5183	29.5679	5.39918e-08	5.35183e-07
ENSG00000185742	C11orf87	chromosome 11 open reading frame 87 [Source:HGNC Symbol;Acc:33788]	1.39642	1.34588	29.5185	5.53862e-08	5.48639e-07
ENSG00000240656	-	A)	-0.912445	2.80489	29.456	5.7202e-08	5.66246e-07
ENSG00000179855	GIPC3	GIPC PDZ domain containing family, member 3 [Source:HGNC Symbol;Acc:18183]	-2.76763	-0.238424	29.4528	5.72959e-08	5.66797e-07
ENSG00000205250	E2F4	E2F transcription factor 4, p107/p130-binding [Source:HGNC Symbol;Acc:3118]	0.494299	6.05088	29.4457	5.75066e-08	5.68501e-07
ENSG00000142686	C1orf216	chromosome 1 open reading frame 216 [Source:HGNC Symbol;Acc:26800]	-0.398921	6.16425	29.4218	5.82201e-08	5.75171e-07
ENSG00000119669	IRF2BPL	interferon regulatory factor 2 binding protein-like [Source:HGNC Symbol;Acc:14282]	0.634361	4.47995	29.4186	5.83155e-08	5.7573e-07
ENSG00000187109	NAP1L1	nucleosome assembly protein 1-like 1 [Source:HGNC Symbol;Acc:7637]	0.315816	10.2167	29.415	5.8425e-08	5.76427e-07
ENSG00000204388	HSPA1B	heat shock 70kDa protein 1B [Source:HGNC Symbol;Acc:5233]	0.984488	5.38943	29.3705	5.97807e-08	5.89058e-07
ENSG00000013441	CLK1	CDC-like kinase 1 [Source:HGNC Symbol;Acc:2068]	-0.371684	7.2383	29.3704	5.97849e-08	5.89058e-07
ENSG00000101654	RNMT	RNA (guanine-7-) methyltransferase [Source:HGNC Symbol;Acc:10075]	-0.355918	7.19372	29.346	6.05422e-08	5.96123e-07
ENSG00000198894	KIAA1737	KIAA1737 [Source:HGNC Symbol;Acc:20365]	0.432801	5.83075	29.3206	6.13393e-08	6.03297e-07
ENSG00000170500	LONRF2	LON peptidase N-terminal domain and ring finger 2 [Source:HGNC Symbol;Acc:24788]	-1.45834	1.38754	29.3202	6.13522e-08	6.03297e-07
ENSG00000197961	ZNF121	zinc finger protein 121 [Source:HGNC Symbol;Acc:12904]	0.452151	5.72797	29.3117	6.16235e-08	6.05562e-07
ENSG00000177600	RPLP2	ribosomal protein, large, P2 [Source:HGNC Symbol;Acc:10377]	0.392684	8.00685	29.2949	6.21601e-08	6.1043e-07
ENSG00000006459	JHDM1D	jumonji C domain containing histone demethylase 1 homolog D (S. cerevisiae) [Source:HGNC Symbol;Acc:22224]	-0.458804	5.73339	29.2769	6.27396e-08	6.15712e-07
ENSG00000184445	KNTC1	kinetochore associated 1 [Source:HGNC Symbol;Acc:17255]	-0.348355	7.30924	29.2525	6.35328e-08	6.23084e-07
ENSG00000196233	LCOR	ligand dependent nuclear receptor corepressor [Source:HGNC Symbol;Acc:29503]	-0.351967	7.32436	29.241	6.39136e-08	6.26404e-07
ENSG00000082213	C5orf22	chromosome 5 open reading frame 22 [Source:HGNC Symbol;Acc:25639]	-0.434385	6.17751	29.2183	6.46668e-08	6.33106e-07
ENSG00000180773	SLC36A4	solute carrier family 36 (proton/amino acid symporter), member 4 [Source:HGNC Symbol;Acc:19660]	-0.436639	6.05208	29.2167	6.4718e-08	6.33106e-07
ENSG00000109790	KLHL5	kelch-like 5 (Drosophila) [Source:HGNC Symbol;Acc:6356]	-0.468598	5.42866	29.2165	6.47257e-08	6.33106e-07
ENSG00000168016	TRANK1	tetratricopeptide repeat and ankyrin repeat containing 1 [Source:HGNC Symbol;Acc:29011]	-1.74782	1.45225	29.155	6.68138e-08	6.53099e-07
ENSG00000124641	MED20	mediator complex subunit 20 [Source:HGNC Symbol;Acc:16840]	-0.472782	5.42725	29.1339	6.75464e-08	6.59613e-07
ENSG00000124587	PEX6	peroxisomal biogenesis factor 6 [Source:HGNC Symbol;Acc:8859]	0.754983	4.11532	29.1332	6.75692e-08	6.59613e-07
ENSG00000117598	LPPR5	Lipid phosphate phosphatase-related protein type 5 [Source:UniProtKB/Swiss-Prot;Acc:Q32ZL2]	0.531672	4.95902	29.1212	6.79905e-08	6.63288e-07
ENSG00000186174	BCL9L	B-cell CLL/lymphoma 9-like [Source:HGNC Symbol;Acc:23688]	0.806807	3.84754	29.1078	6.84608e-08	6.67437e-07
ENSG00000136942	RPL35	ribosomal protein L35 [Source:HGNC Symbol;Acc:10344]	0.394856	7.68837	29.0944	6.89374e-08	6.71444e-07
ENSG00000182253	SYNM	synemin, intermediate filament protein [Source:HGNC Symbol;Acc:24466]	-0.54503	5.19936	29.0937	6.89626e-08	6.71444e-07
ENSG00000057935	MTA3	metastasis associated 1 family, member 3 [Source:HGNC Symbol;Acc:23784]	-0.451045	5.64941	29.038	7.09729e-08	6.90564e-07
ENSG00000005249	PRKAR2B	protein kinase, cAMP-dependent, regulatory, type II, beta [Source:HGNC Symbol;Acc:9392]	-0.476106	5.39834	29.0326	7.11701e-08	6.92028e-07
ENSG00000198231	DDX42	DEAD (Asp-Glu-Ala-Asp) box polypeptide 42 [Source:HGNC Symbol;Acc:18676]	-0.331833	8.74818	29.0083	7.20673e-08	7.00292e-07
ENSG00000176890	TYMS	thymidylate synthetase [Source:HGNC Symbol;Acc:12441]	-0.310939	8.15685	29.0011	7.23369e-08	7.0245e-07
ENSG00000177034	MTX3	metaxin 3 [Source:HGNC Symbol;Acc:24812]	0.416306	6.42884	28.9483	7.43378e-08	7.21408e-07
ENSG00000106399	RPA3	replication protein A3, 14kDa [Source:HGNC Symbol;Acc:10291]	-0.529511	4.96413	28.925	7.52364e-08	7.2965e-07
ENSG00000197757	HOXC6	homeobox C6 [Source:HGNC Symbol;Acc:5128]	-0.923108	2.62589	28.8612	7.77546e-08	7.53579e-07
ENSG00000052795	FNIP2	folliculin interacting protein 2 [Source:HGNC Symbol;Acc:29280]	0.379553	6.43869	28.8316	7.89518e-08	7.64681e-07
ENSG00000133142	TCEAL4	transcription elongation factor A (SII)-like 4 [Source:HGNC Symbol;Acc:26121]	-0.449179	5.63971	28.7444	8.25878e-08	7.99374e-07
ENSG00000069275	NUCKS1	nuclear casein kinase and cyclin-dependent kinase substrate 1 [Source:HGNC Symbol;Acc:29923]	-0.301402	10.3422	28.7409	8.27394e-08	8.00318e-07
ENSG00000165637	VDAC2	voltage-dependent anion channel 2 [Source:HGNC Symbol;Acc:12672]	0.343337	7.43424	28.7391	8.28135e-08	8.00512e-07
ENSG00000135336	ORC3	origin recognition complex, subunit 3 [Source:HGNC Symbol;Acc:8489]	-0.435567	6.05797	28.7319	8.31227e-08	8.02651e-07
ENSG00000153551	CMTM7	CKLF-like MARVEL transmembrane domain containing 7 [Source:HGNC Symbol;Acc:19178]	-0.559126	4.84851	28.7314	8.31432e-08	8.02651e-07
ENSG00000117477	C1orf114	chromosome 1 open reading frame 114 [Source:HGNC Symbol;Acc:28051]	0.755042	3.60504	28.7276	8.33075e-08	8.03714e-07
ENSG00000166986	MARS	methionyl-tRNA synthetase [Source:HGNC Symbol;Acc:6898]	0.347745	7.99538	28.7233	8.34921e-08	8.04629e-07
ENSG00000154263	ABCA10	ATP-binding cassette, sub-family A (ABC1), member 10 [Source:HGNC Symbol;Acc:30]	-0.770404	3.21828	28.7229	8.3511e-08	8.04629e-07
ENSG00000154319	FAM167A	family with sequence similarity 167, member A [Source:HGNC Symbol;Acc:15549]	-1.23436	1.7636	28.7063	8.42304e-08	8.10958e-07
ENSG00000160131	VMA21	VMA21 vacuolar H+-ATPase homolog (S. cerevisiae) [Source:HGNC Symbol;Acc:22082]	-0.353336	7.13646	28.7052	8.42774e-08	8.10958e-07
ENSG00000214114	MYCBP	c-myc binding protein [Source:HGNC Symbol;Acc:7554]	-0.575717	4.61912	28.6894	8.4967e-08	8.1694e-07
ENSG00000100485	SOS2	son of sevenless homolog 2 (Drosophila) [Source:HGNC Symbol;Acc:11188]	-0.486062	5.90596	28.6884	8.50095e-08	8.1694e-07
ENSG00000217791	ASS1P9	argininosuccinate synthetase 1 pseudogene 9 [Source:HGNC Symbol;Acc:772]	-1.91199	-0.0289834	28.6858	8.51276e-08	8.17545e-07
ENSG00000115325	DOK1	docking protein 1, 62kDa (downstream of tyrosine kinase 1) [Source:HGNC Symbol;Acc:2990]	-0.985894	2.50169	28.6666	8.59732e-08	8.25131e-07
ENSG00000261597	RP11-353B9.1		0.627446	4.35931	28.6555	8.64702e-08	8.29364e-07
ENSG00000243244	STON1	stonin 1 [Source:HGNC Symbol;Acc:17003]	-0.832127	3.03008	28.569	9.04159e-08	8.66647e-07
ENSG00000197111	PCBP2	poly(rC) binding protein 2 [Source:HGNC Symbol;Acc:8648]	0.318434	7.94636	28.5118	9.31314e-08	8.92098e-07
ENSG00000188042	ARL4C	ADP-ribosylation factor-like 4C [Source:HGNC Symbol;Acc:698]	0.695878	3.68026	28.5027	9.35692e-08	8.95712e-07
ENSG00000107281	NPDC1	neural proliferation, differentiation and control, 1 [Source:HGNC Symbol;Acc:7899]	0.734016	4.45032	28.4857	9.4394e-08	9.03024e-07
ENSG00000164096	C4orf3	chromosome 4 open reading frame 3 [Source:HGNC Symbol;Acc:19225]	-0.375142	6.46397	28.4813	9.46082e-08	9.04488e-07
ENSG00000166450	PRTG	protogenin [Source:HGNC Symbol;Acc:26373]	-0.593225	4.3786	28.4453	9.63839e-08	9.20871e-07
ENSG00000104517	UBR5	ubiquitin protein ligase E3 component n-recognin 5 [Source:HGNC Symbol;Acc:16806]	-0.299686	8.0947	28.4301	9.71423e-08	9.27518e-07
ENSG00000137936	BCAR3	breast cancer anti-estrogen resistance 3 [Source:HGNC Symbol;Acc:973]	1.03995	2.07474	28.4197	9.76665e-08	9.31496e-07
ENSG00000174013	FBXO45	F-box protein 45 [Source:HGNC Symbol;Acc:29148]	0.363784	6.76165	28.4193	9.76847e-08	9.31496e-07
ENSG00000063046	EIF4B	eukaryotic translation initiation factor 4B [Source:HGNC Symbol;Acc:3285]	0.277525	9.05501	28.4065	9.83332e-08	9.37076e-07
ENSG00000164758	MED30	mediator complex subunit 30 [Source:HGNC Symbol;Acc:23032]	-0.662934	3.97184	28.4008	9.8624e-08	9.38744e-07
ENSG00000058866	DGKG	diacylglycerol kinase, gamma 90kDa [Source:HGNC Symbol;Acc:2853]	-2.36392	-0.23571	28.4006	9.8635e-08	9.38744e-07
ENSG00000132326	PER2	period homolog 2 (Drosophila) [Source:HGNC Symbol;Acc:8846]	0.690006	4.07018	28.3785	9.9767e-08	9.48908e-07
ENSG00000002834	LASP1	LIM and SH3 protein 1 [Source:HGNC Symbol;Acc:6513]	-0.526522	5.19376	28.3352	1.02025e-07	9.69757e-07
ENSG00000138650	PCDH10	protocadherin 10 [Source:HGNC Symbol;Acc:13404]	0.927338	2.71702	28.316	1.03039e-07	9.78774e-07
ENSG00000121390	PSPC1	paraspeckle component 1 [Source:HGNC Symbol;Acc:20320]	-0.356257	6.79194	28.3052	1.03615e-07	9.83612e-07
ENSG00000165244	ZNF367	zinc finger protein 367 [Source:HGNC Symbol;Acc:18320]	-0.616831	4.47215	28.2998	1.03909e-07	9.85773e-07
ENSG00000204839	C8orf73	chromosome 8 open reading frame 73 [Source:HGNC Symbol;Acc:27814]	1.7041	1.00053	28.2922	1.04314e-07	9.88981e-07
ENSG00000167107	ACSF2	acyl-CoA synthetase family member 2 [Source:HGNC Symbol;Acc:26101]	-0.634039	4.65481	28.288	1.0454e-07	9.90487e-07
ENSG00000197774	EME2	essential meiotic endonuclease 1 homolog 2 (S. pombe) [Source:HGNC Symbol;Acc:27289]	0.893845	3.16729	28.2787	1.05044e-07	9.94624e-07
ENSG00000250067	YJEFN3	YjeF N-terminal domain containing 3 [Source:HGNC Symbol;Acc:24785]	1.04825	3.05306	28.2502	1.06602e-07	1.00874e-06
ENSG00000006118	TMEM132A	transmembrane protein 132A [Source:HGNC Symbol;Acc:31092]	0.544437	6.95989	28.2456	1.0686e-07	1.01053e-06
ENSG00000102683	SGCG	sarcoglycan, gamma (35kDa dystrophin-associated glycoprotein) [Source:HGNC Symbol;Acc:10809]	1.97339	0.0999192	28.1797	1.1056e-07	1.04485e-06
ENSG00000129159	KCNC1	potassium voltage-gated channel, Shaw-related subfamily, member 1 [Source:HGNC Symbol;Acc:6233]	0.605345	4.83328	28.1497	1.12283e-07	1.06046e-06
ENSG00000165462	PHOX2A	paired-like homeobox 2a [Source:HGNC Symbol;Acc:691]	-0.507681	6.06193	28.115	1.14317e-07	1.07898e-06
ENSG00000120533	ENY2	enhancer of yellow 2 homolog (Drosophila) [Source:HGNC Symbol;Acc:24449]	-0.335473	7.40422	28.1	1.15203e-07	1.08665e-06
ENSG00000175866	BAIAP2	BAI1-associated protein 2 [Source:HGNC Symbol;Acc:947]	0.528897	5.62338	28.0881	1.15915e-07	1.09267e-06
ENSG00000185633	NDUFA4L2	NADH dehydrogenase (ubiquinone) 1 alpha subcomplex, 4-like 2 [Source:HGNC Symbol;Acc:29836]	2.7431	-0.753413	28.0709	1.16949e-07	1.10172e-06
ENSG00000110075	PPP6R3	protein phosphatase 6, regulatory subunit 3 [Source:HGNC Symbol;Acc:1173]	-0.325788	7.5137	28.0456	1.18492e-07	1.11554e-06
ENSG00000131711	MAP1B	microtubule-associated protein 1B [Source:HGNC Symbol;Acc:6836]	0.251394	10.4665	27.9847	1.2228e-07	1.15047e-06
ENSG00000213420	GPC2	glypican 2 [Source:HGNC Symbol;Acc:4450]	0.576436	5.2026	27.9752	1.22883e-07	1.15541e-06
ENSG00000242498	C15orf38	chromosome 15 open reading frame 38 [Source:HGNC Symbol;Acc:28782]	-0.694009	3.67202	27.9676	1.23365e-07	1.15921e-06
ENSG00000105643	ARRDC2	arrestin domain containing 2 [Source:HGNC Symbol;Acc:25225]	-0.876684	2.71155	27.9415	1.25041e-07	1.17421e-06
ENSG00000130226	DPP6	dipeptidyl-peptidase 6 [Source:HGNC Symbol;Acc:3010]	-0.753315	3.65483	27.9303	1.25768e-07	1.18029e-06
ENSG00000144357	UBR3	ubiquitin protein ligase E3 component n-recognin 3 (putative) [Source:HGNC Symbol;Acc:30467]	-0.338026	7.05578	27.9232	1.26229e-07	1.18387e-06
ENSG00000102890	ELMO3	engulfment and cell motility 3 [Source:HGNC Symbol;Acc:17289]	1.52294	1.13175	27.911	1.27024e-07	1.19057e-06
ENSG00000025039	RRAGD	Ras-related GTP binding D [Source:HGNC Symbol;Acc:19903]	0.501663	5.02455	27.9049	1.27425e-07	1.19357e-06
ENSG00000111224	PARP11	poly (ADP-ribose) polymerase family, member 11 [Source:HGNC Symbol;Acc:1186]	-0.737789	3.85759	27.9017	1.27636e-07	1.19479e-06
ENSG00000163719	MTMR14	myotubularin related protein 14 [Source:HGNC Symbol;Acc:26190]	-0.629214	4.68606	27.8975	1.27918e-07	1.19668e-06
ENSG00000183864	TOB2	transducer of ERBB2, 2 [Source:HGNC Symbol;Acc:11980]	0.433387	6.26519	27.8913	1.28328e-07	1.19976e-06
ENSG00000105373	GLTSCR2	glioma tumor suppressor candidate region gene 2 [Source:HGNC Symbol;Acc:4333]	0.493713	6.23262	27.8865	1.28644e-07	1.20126e-06
ENSG00000239935	-	A)	-0.65609	6.20226	27.8864	1.28651e-07	1.20126e-06
ENSG00000136098	NEK3	NIMA (never in mitosis gene a)-related kinase 3 [Source:HGNC Symbol;Acc:7746]	-0.617714	4.42993	27.8769	1.29282e-07	1.20639e-06
ENSG00000159164	SV2A	synaptic vesicle glycoprotein 2A [Source:HGNC Symbol;Acc:20566]	0.334714	7.80738	27.8662	1.29998e-07	1.21231e-06
ENSG00000144224	UBXN4	UBX domain protein 4 [Source:HGNC Symbol;Acc:14860]	-0.354469	7.79694	27.8614	1.30321e-07	1.21455e-06
ENSG00000133315	MACROD1	MACRO domain containing 1 [Source:HGNC Symbol;Acc:29598]	-0.86368	2.67165	27.8512	1.31011e-07	1.22022e-06
ENSG00000185591	SP1	Sp1 transcription factor [Source:HGNC Symbol;Acc:11205]	0.33139	7.45838	27.8225	1.32974e-07	1.23772e-06
ENSG00000225151	AC103965.1		0.414794	6.68918	27.8171	1.33341e-07	1.23996e-06
ENSG00000139239	RPL14P1	ribosomal protein L14 pseudogene 1 [Source:HGNC Symbol;Acc:31384]	0.455288	5.81935	27.8165	1.33382e-07	1.23996e-06
ENSG00000162819	BROX	BRO1 domain and CAAX motif containing [Source:HGNC Symbol;Acc:26512]	-0.403539	6.13462	27.8034	1.34288e-07	1.2476e-06
ENSG00000090013	BLVRB	biliverdin reductase B (flavin reductase (NADPH)) [Source:HGNC Symbol;Acc:1063]	-1.05887	1.95626	27.7727	1.36437e-07	1.26677e-06
ENSG00000185627	PSMD13	proteasome (prosome, macropain) 26S subunit, non-ATPase, 13 [Source:HGNC Symbol;Acc:9558]	-0.339498	7.08116	27.7571	1.37544e-07	1.27625e-06
ENSG00000147123	NDUFB11	NADH dehydrogenase (ubiquinone) 1 beta subcomplex, 11, 17.3kDa [Source:HGNC Symbol;Acc:20372]	-0.422569	6.21582	27.7307	1.39432e-07	1.2925e-06
ENSG00000173221	GLRX	glutaredoxin (thioltransferase) [Source:HGNC Symbol;Acc:4330]	-0.728684	3.55017	27.7302	1.3947e-07	1.2925e-06
ENSG00000101665	SMAD7	SMAD family member 7 [Source:HGNC Symbol;Acc:6773]	-0.551521	4.95632	27.7239	1.39926e-07	1.29591e-06
ENSG00000235370	CSPG4P5	chondroitin sulfate proteoglycan 4 pseudogene 5 [Source:HGNC Symbol;Acc:29403]	0.828336	4.016	27.7184	1.40322e-07	1.29877e-06
ENSG00000167173	C15orf39	chromosome 15 open reading frame 39 [Source:HGNC Symbol;Acc:24497]	0.683216	4.46213	27.6971	1.41875e-07	1.31232e-06
ENSG00000204178	TMEM57	transmembrane protein 57 [Source:HGNC Symbol;Acc:25572]	-0.460626	5.72615	27.6949	1.42036e-07	1.31299e-06
ENSG00000173275	ZNF449	zinc finger protein 449 [Source:HGNC Symbol;Acc:21039]	-0.699547	3.55502	27.6908	1.42338e-07	1.31496e-06
ENSG00000228716	DHFR	dihydrofolate reductase [Source:HGNC Symbol;Acc:2861]	-0.305354	7.99559	27.6779	1.43288e-07	1.32291e-06
ENSG00000157837	SPPL3	signal peptide peptidase like 3 [Source:HGNC Symbol;Acc:30424]	-0.466654	5.45979	27.6727	1.43673e-07	1.32564e-06
ENSG00000143390	RFX5	regulatory factor X, 5 (influences HLA class II expression) [Source:HGNC Symbol;Acc:9986]	-0.343055	7.22512	27.6576	1.44802e-07	1.33522e-06
ENSG00000236104	ZBTB22	zinc finger and BTB domain containing 22 [Source:HGNC Symbol;Acc:13085]	-0.807338	2.953	27.6176	1.47828e-07	1.36228e-06
ENSG00000056998	GYG2	glycogenin 2 [Source:HGNC Symbol;Acc:4700]	-0.654421	4.00974	27.5698	1.5153e-07	1.39552e-06
ENSG00000249307	RP11-438E5.1		-0.986145	1.96337	27.5371	1.54108e-07	1.41787e-06
ENSG00000159256	MORC3	MORC family CW-type zinc finger 3 [Source:HGNC Symbol;Acc:23572]	-0.45145	5.91529	27.5366	1.54148e-07	1.41787e-06
ENSG00000101888	NXT2	nuclear transport factor 2-like export factor 2 [Source:HGNC Symbol;Acc:18151]	-0.878073	2.92946	27.4884	1.5804e-07	1.45277e-06
ENSG00000187391	MAGI2	membrane associated guanylate kinase, WW and PDZ domain containing 2 [Source:HGNC Symbol;Acc:18957]	-0.781605	3.18598	27.4475	1.6142e-07	1.48292e-06
ENSG00000136940	PDCL	phosducin-like [Source:HGNC Symbol;Acc:8770]	-0.444656	5.72444	27.4349	1.62468e-07	1.49163e-06
ENSG00000075420	FNDC3B	fibronectin type III domain containing 3B [Source:HGNC Symbol;Acc:24670]	0.388464	6.18806	27.4222	1.63545e-07	1.50058e-06
ENSG00000128567	PODXL	podocalyxin-like [Source:HGNC Symbol;Acc:9171]	0.787992	3.64987	27.4159	1.64073e-07	1.50449e-06
ENSG00000123836	PFKFB2	6-phosphofructo-2-kinase/fructose-2,6-biphosphatase 2 [Source:HGNC Symbol;Acc:8873]	-0.664972	4.13645	27.3709	1.6794e-07	1.53867e-06
ENSG00000240336	RP11-405L18.1		0.543488	4.66917	27.3701	1.68007e-07	1.53867e-06
ENSG00000136631	VPS45	vacuolar protein sorting 45 homolog (S. cerevisiae) [Source:HGNC Symbol;Acc:14579]	-0.298763	8.16885	27.358	1.69067e-07	1.54741e-06
ENSG00000121440	PDZRN3	PDZ domain containing ring finger 3 [Source:HGNC Symbol;Acc:17704]	0.667923	4.08363	27.3523	1.69564e-07	1.551e-06
ENSG00000140943	MBTPS1	membrane-bound transcription factor peptidase, site 1 [Source:HGNC Symbol;Acc:15456]	-0.42709	5.76086	27.3349	1.71091e-07	1.56401e-06
ENSG00000137818	RPLP1	ribosomal protein, large, P1 [Source:HGNC Symbol;Acc:10372]	0.354294	9.26497	27.2867	1.75418e-07	1.60257e-06
ENSG00000126602	TRAP1	TNF receptor-associated protein 1 [Source:HGNC Symbol;Acc:16264]	0.377242	6.84067	27.2843	1.75628e-07	1.6035e-06
ENSG00000092853	CLSPN	claspin [Source:HGNC Symbol;Acc:19715]	-0.381224	6.32937	27.2663	1.77279e-07	1.61757e-06
ENSG00000237149	ZNF503-AS2	ZNF503 antisense RNA 2 [Source:HGNC Symbol;Acc:23525]	1.725	0.817485	27.2351	1.80159e-07	1.64284e-06
ENSG00000164989	CCDC171	coiled-coil domain containing 171 [Source:HGNC Symbol;Acc:29828]	-0.74451	3.24271	27.2271	1.80902e-07	1.6486e-06
ENSG00000172840	PDP2	pyruvate dehyrogenase phosphatase catalytic subunit 2 [Source:HGNC Symbol;Acc:30263]	0.517823	5.04957	27.1857	1.84821e-07	1.68328e-06
ENSG00000183978	COA3	cytochrome C oxidase assembly factor 3 [Source:HGNC Symbol;Acc:24990]	-0.456585	5.46913	27.1611	1.87191e-07	1.70382e-06
ENSG00000111669	TPI1	triosephosphate isomerase 1 [Source:HGNC Symbol;Acc:12009]	0.291971	8.98633	27.1395	1.89288e-07	1.72184e-06
ENSG00000091656	ZFHX4	zinc finger homeobox 4 [Source:HGNC Symbol;Acc:30939]	0.380876	6.51221	27.1294	1.90282e-07	1.72983e-06
ENSG00000012660	ELOVL5	ELOVL fatty acid elongase 5 [Source:HGNC Symbol;Acc:21308]	0.30403	7.6238	27.1051	1.92686e-07	1.75061e-06
ENSG00000109323	MANBA	mannosidase, beta A, lysosomal [Source:HGNC Symbol;Acc:6831]	0.679353	3.72088	27.0939	1.93805e-07	1.75969e-06
ENSG00000164088	PPM1M	protein phosphatase, Mg2+/Mn2+ dependent, 1M [Source:HGNC Symbol;Acc:26506]	0.721613	3.47762	27.0886	1.94337e-07	1.76344e-06
ENSG00000174720	LARP7	La ribonucleoprotein domain family, member 7 [Source:HGNC Symbol;Acc:24912]	-0.36314	6.53409	27.0273	2.006e-07	1.81915e-06
ENSG00000215021	PHB2	prohibitin 2 [Source:HGNC Symbol;Acc:30306]	0.328017	8.07447	27.0171	2.01663e-07	1.82768e-06
ENSG00000112773	FAM46A	family with sequence similarity 46, member A [Source:HGNC Symbol;Acc:18345]	-0.622042	4.23355	27.0077	2.02648e-07	1.83548e-06
ENSG00000107554	DNMBP	dynamin binding protein [Source:HGNC Symbol;Acc:30373]	-0.638842	3.83901	27.0054	2.02889e-07	1.83654e-06
ENSG00000154646	TMPRSS15	transmembrane protease, serine 15 [Source:HGNC Symbol;Acc:9490]	0.369159	6.645	27.0037	2.0307e-07	1.83705e-06
ENSG00000146085	MUT	methylmalonyl CoA mutase [Source:HGNC Symbol;Acc:7526]	-0.414359	5.93352	26.9813	2.05435e-07	1.85732e-06
ENSG00000133195	SLC39A11	solute carrier family 39 (metal ion transporter), member 11 [Source:HGNC Symbol;Acc:14463]	-0.591703	4.26245	26.9729	2.06332e-07	1.86429e-06
ENSG00000107443	CCNJ	cyclin J [Source:HGNC Symbol;Acc:23434]	0.334487	7.31895	26.9465	2.09167e-07	1.88875e-06
ENSG00000229119	CTB-63M22.1		0.617395	4.12563	26.9443	2.09409e-07	1.88944e-06
ENSG00000072310	SREBF1	sterol regulatory element binding transcription factor 1 [Source:HGNC Symbol;Acc:11289]	0.895436	3.68562	26.9434	2.09498e-07	1.88944e-06
ENSG00000165102	HGSNAT	heparan-alpha-glucosaminide N-acetyltransferase [Source:HGNC Symbol;Acc:26527]	-0.491926	5.14567	26.9023	2.13999e-07	1.92885e-06
ENSG00000251550	RP11-501C14.7		-1.71558	0.464701	26.8799	2.16499e-07	1.9502e-06
ENSG00000214078	CPNE1	copine I [Source:HGNC Symbol;Acc:2314]	0.470349	5.73668	26.8683	2.17803e-07	1.96075e-06
ENSG00000100749	VRK1	vaccinia related kinase 1 [Source:HGNC Symbol;Acc:12718]	-0.386404	6.58234	26.827	2.22506e-07	2.00187e-06
ENSG00000092871	RFFL	ring finger and FYVE-like domain containing E3 ubiquitin protein ligase [Source:HGNC Symbol;Acc:24821]	-0.498274	5.22418	26.784	2.27514e-07	2.04569e-06
ENSG00000165983	PTER	phosphotriesterase related [Source:HGNC Symbol;Acc:9590]	-0.97843	2.63191	26.775	2.28574e-07	2.05398e-06
ENSG00000104899	AMH	anti-Mullerian hormone [Source:HGNC Symbol;Acc:464]	1.1479	3.21724	26.7615	2.30182e-07	2.06717e-06
ENSG00000059573	ALDH18A1	aldehyde dehydrogenase 18 family, member A1 [Source:HGNC Symbol;Acc:9722]	0.313694	7.51481	26.7545	2.31017e-07	2.07341e-06
ENSG00000140416	TPM1	tropomyosin 1 (alpha) [Source:HGNC Symbol;Acc:12010]	-0.355685	6.66171	26.747	2.31909e-07	2.08015e-06
ENSG00000187862	TTC24	tetratricopeptide repeat domain 24 [Source:HGNC Symbol;Acc:32348]	2.38583	0.054182	26.7361	2.33219e-07	2.09064e-06
ENSG00000169925	BRD3	bromodomain containing 3 [Source:HGNC Symbol;Acc:1104]	-0.425796	6.01753	26.722	2.34936e-07	2.10476e-06
ENSG00000197885	NKIRAS1	NFKB inhibitor interacting Ras-like 1 [Source:HGNC Symbol;Acc:17899]	0.586231	4.669	26.6931	2.38476e-07	2.13518e-06
ENSG00000200127	Y_RNA	Y RNA [Source:RFAM;Acc:RF00019]	1.94568	0.386564	26.6136	2.48493e-07	2.22353e-06
ENSG00000135912	TTLL4	tubulin tyrosine ligase-like family, member 4 [Source:HGNC Symbol;Acc:28976]	0.445727	5.84265	26.5996	2.50292e-07	2.23827e-06
ENSG00000070759	TESK2	testis-specific kinase 2 [Source:HGNC Symbol;Acc:11732]	-1.37582	1.43798	26.5262	2.59986e-07	2.32356e-06
ENSG00000179431	FJX1	four jointed box 1 (Drosophila) [Source:HGNC Symbol;Acc:17166]	0.607491	4.40569	26.5178	2.61122e-07	2.3323e-06
ENSG00000107863	ARHGAP21	Rho GTPase activating protein 21 [Source:HGNC Symbol;Acc:23725]	-0.363187	6.40743	26.5084	2.62392e-07	2.34223e-06
ENSG00000220884	MESTP1	mesoderm specific transcript homolog (mouse) pseudogene 1 [Source:HGNC Symbol;Acc:29660]	2.06739	0.0383693	26.5056	2.6277e-07	2.34419e-06
ENSG00000081377	CDC14B	CDC14 cell division cycle 14 homolog B (S. cerevisiae) [Source:HGNC Symbol;Acc:1719]	-0.55338	4.76665	26.4803	2.66243e-07	2.37374e-06
ENSG00000134326	CMPK2	cytidine monophosphate (UMP-CMP) kinase 2, mitochondrial [Source:HGNC Symbol;Acc:27015]	-1.88812	0.168653	26.458	2.69329e-07	2.3992e-06
ENSG00000186868	MAPT	microtubule-associated protein tau [Source:HGNC Symbol;Acc:6893]	1.02107	2.36629	26.4573	2.69422e-07	2.3992e-06
ENSG00000213790	RP1-257I20.13		0.713009	3.49378	26.4522	2.70146e-07	2.4042e-06
ENSG00000160801	PTH1R	parathyroid hormone 1 receptor [Source:HGNC Symbol;Acc:9608]	-1.02528	1.85095	26.4468	2.70901e-07	2.40947e-06
ENSG00000118200	CAMSAP2	calmodulin regulated spectrin-associated protein family, member 2 [Source:HGNC Symbol;Acc:29188]	0.310724	7.59148	26.4333	2.72793e-07	2.42484e-06
ENSG00000105953	OGDH	oxoglutarate (alpha-ketoglutarate) dehydrogenase (lipoamide) [Source:HGNC Symbol;Acc:8124]	0.490437	5.68614	26.4288	2.73435e-07	2.4291e-06
ENSG00000111052	LIN7A	lin-7 homolog A (C. elegans) [Source:HGNC Symbol;Acc:17787]	-0.41857	5.89436	26.4227	2.74305e-07	2.43536e-06
ENSG00000162402	USP24	ubiquitin specific peptidase 24 [Source:HGNC Symbol;Acc:12623]	0.294867	8.10953	26.4131	2.75671e-07	2.44603e-06
ENSG00000116690	PRG4	proteoglycan 4 [Source:HGNC Symbol;Acc:9364]	-1.49598	0.631366	26.3849	2.79712e-07	2.48039e-06
ENSG00000152154	TMEM178A	transmembrane protein 178A [Source:HGNC Symbol;Acc:28517]	1.98855	0.100751	26.3803	2.80379e-07	2.48482e-06
ENSG00000139436	GIT2	G protein-coupled receptor kinase interacting ArfGAP 2 [Source:HGNC Symbol;Acc:4273]	-0.475982	5.20012	26.3681	2.82169e-07	2.49919e-06
ENSG00000166938	DIS3L	DIS3 mitotic control homolog (S. cerevisiae)-like [Source:HGNC Symbol;Acc:28698]	-0.514521	5.02665	26.3655	2.82547e-07	2.50104e-06
ENSG00000100095	SEZ6L	seizure related 6 homolog (mouse)-like [Source:HGNC Symbol;Acc:10763]	0.531859	4.57263	26.3354	2.86978e-07	2.53875e-06
ENSG00000014138	POLA2	polymerase (DNA directed), alpha 2, accessory subunit [Source:HGNC Symbol;Acc:30073]	-0.451048	5.62165	26.291	2.93648e-07	2.5962e-06
ENSG00000134138	MEIS2	Meis homeobox 2 [Source:HGNC Symbol;Acc:7001]	-0.345654	6.68417	26.2619	2.9811e-07	2.63407e-06
ENSG00000004139	SARM1	sterile alpha and TIR motif containing 1 [Source:HGNC Symbol;Acc:17074]	0.666263	4.18409	26.2493	3.0006e-07	2.64973e-06
ENSG00000159593	NAE1	NEDD8 activating enzyme E1 subunit 1 [Source:HGNC Symbol;Acc:621]	-0.36618	7.65712	26.2477	3.00306e-07	2.65031e-06
ENSG00000154473	BUB3	budding uninhibited by benzimidazoles 3 homolog (yeast) [Source:HGNC Symbol;Acc:1151]	-0.306894	8.23613	26.2252	3.03834e-07	2.67985e-06
ENSG00000225156	AC012354.6		-1.59405	1.09039	26.2221	3.04325e-07	2.68259e-06
ENSG00000100994	PYGB	phosphorylase, glycogen; brain [Source:HGNC Symbol;Acc:9723]	-0.455845	6.76954	26.2049	3.0705e-07	2.705e-06
ENSG00000104131	EIF3J	eukaryotic translation initiation factor 3, subunit J [Source:HGNC Symbol;Acc:3270]	0.312406	8.06959	26.1887	3.09629e-07	2.7261e-06
ENSG00000181523	SGSH	N-sulfoglucosamine sulfohydrolase [Source:HGNC Symbol;Acc:10818]	-0.81446	3.28371	26.1601	3.14252e-07	2.76515e-06
ENSG00000154822	PLCL2	phospholipase C-like 2 [Source:HGNC Symbol;Acc:9064]	-0.562667	4.49286	26.11	3.22505e-07	2.83609e-06
ENSG00000168439	STIP1	stress-induced-phosphoprotein 1 [Source:HGNC Symbol;Acc:11387]	0.313029	8.66951	26.1086	3.22744e-07	2.83651e-06
ENSG00000206560	ANKRD28	ankyrin repeat domain 28 [Source:HGNC Symbol;Acc:29024]	-0.404117	6.3683	26.0906	3.25758e-07	2.8613e-06
ENSG00000154277	UCHL1	ubiquitin carboxyl-terminal esterase L1 (ubiquitin thiolesterase) [Source:HGNC Symbol;Acc:12513]	-0.286654	8.29981	26.0866	3.2645e-07	2.86568e-06
ENSG00000229638	RP11-110C15.4		0.440544	5.71007	26.0838	3.26913e-07	2.86804e-06
ENSG00000143772	ITPKB	inositol-trisphosphate 3-kinase B [Source:HGNC Symbol;Acc:6179]	-0.374567	7.1432	26.0655	3.30022e-07	2.8936e-06
ENSG00000172974	AC007318.5		0.418008	5.74106	26.0221	3.37531e-07	2.95769e-06
ENSG00000125844	RRBP1	ribosome binding protein 1 homolog 180kDa (dog) [Source:HGNC Symbol;Acc:10448]	0.635908	5.25412	26.0145	3.38868e-07	2.96712e-06
ENSG00000137449	CPEB2	cytoplasmic polyadenylation element binding protein 2 [Source:HGNC Symbol;Acc:21745]	-0.750942	3.58851	26.0137	3.39008e-07	2.96712e-06
ENSG00000145022	TCTA	T-cell leukemia translocation altered [Source:HGNC Symbol;Acc:11692]	-0.703528	3.46803	26.0011	3.41219e-07	2.98471e-06
ENSG00000142700	DMRTA2	DMRT-like family A2 [Source:HGNC Symbol;Acc:13908]	-4.03882	-0.748865	25.9495	3.50472e-07	3.06384e-06
ENSG00000198755	RPL10A	ribosomal protein L10a [Source:HGNC Symbol;Acc:10299]	0.277905	8.96272	25.8757	3.64116e-07	3.18123e-06
ENSG00000183530	PRR14L	proline rich 14-like [Source:HGNC Symbol;Acc:28738]	0.314305	7.2621	25.834	3.72073e-07	3.24884e-06
ENSG00000144802	NFKBIZ	nuclear factor of kappa light polypeptide gene enhancer in B-cells inhibitor, zeta [Source:HGNC Symbol;Acc:29805]	-1.34153	1.2839	25.8	3.78695e-07	3.30472e-06
ENSG00000115468	EFHD1	EF-hand domain family, member D1 [Source:HGNC Symbol;Acc:29556]	-0.810717	2.63303	25.7883	3.81001e-07	3.32287e-06
ENSG00000159348	CYB5R1	cytochrome b5 reductase 1 [Source:HGNC Symbol;Acc:13397]	-0.470024	5.22002	25.7861	3.81416e-07	3.32454e-06
ENSG00000161016	RPL8	ribosomal protein L8 [Source:HGNC Symbol;Acc:10368]	0.41366	9.23648	25.7758	3.83466e-07	3.34044e-06
ENSG00000156273	BACH1	BTB and CNC homology 1, basic leucine zipper transcription factor 1 [Source:HGNC Symbol;Acc:935]	-0.394512	6.77899	25.7734	3.83943e-07	3.34263e-06
ENSG00000188976	NOC2L	nucleolar complex associated 2 homolog (S. cerevisiae) [Source:HGNC Symbol;Acc:24517]	0.518766	5.60524	25.7675	3.8511e-07	3.35082e-06
ENSG00000100836	PABPN1	poly(A) binding protein, nuclear 1 [Source:HGNC Symbol;Acc:8565]	0.388057	6.67859	25.7385	3.90958e-07	3.39971e-06
ENSG00000113391	FAM172A	family with sequence similarity 172, member A [Source:HGNC Symbol;Acc:25365]	-0.579589	4.47335	25.7272	3.93239e-07	3.41753e-06
ENSG00000167900	TK1	thymidine kinase 1, soluble [Source:HGNC Symbol;Acc:11830]	-0.508179	5.25505	25.6674	4.05628e-07	3.52313e-06
ENSG00000149182	ARFGAP2	ADP-ribosylation factor GTPase activating protein 2 [Source:HGNC Symbol;Acc:13504]	-0.412395	6.17775	25.6326	4.12997e-07	3.58504e-06
ENSG00000073849	ST6GAL1	ST6 beta-galactosamide alpha-2,6-sialyltranferase 1 [Source:HGNC Symbol;Acc:10860]	-0.374605	6.1269	25.6037	4.19241e-07	3.6371e-06
ENSG00000198218	QRICH1	glutamine-rich 1 [Source:HGNC Symbol;Acc:24713]	-0.345937	6.76748	25.5737	4.25811e-07	3.69194e-06
ENSG00000107036	KIAA1432	KIAA1432 [Source:HGNC Symbol;Acc:17686]	0.363647	6.40086	25.571	4.26403e-07	3.69491e-06
ENSG00000118181	RPS25	ribosomal protein S25 [Source:HGNC Symbol;Acc:10413]	0.29487	7.90154	25.5613	4.28552e-07	3.71136e-06
ENSG00000124789	NUP153	nucleoporin 153kDa [Source:HGNC Symbol;Acc:8062]	-0.312691	7.88553	25.5564	4.29643e-07	3.71864e-06
ENSG00000085117	CD82	CD82 molecule [Source:HGNC Symbol;Acc:6210]	-1.58145	0.611689	25.5523	4.30553e-07	3.72433e-06
ENSG00000103742	IGDCC4	immunoglobulin superfamily, DCC subclass, member 4 [Source:HGNC Symbol;Acc:13770]	-0.46867	5.31405	25.548	4.31517e-07	3.73049e-06
ENSG00000185760	KCNQ5	potassium voltage-gated channel, KQT-like subfamily, member 5 [Source:HGNC Symbol;Acc:6299]	0.416399	5.65254	25.5388	4.33584e-07	3.74618e-06
ENSG00000134215	VAV3	vav 3 guanine nucleotide exchange factor [Source:HGNC Symbol;Acc:12659]	-0.69085	3.51729	25.5332	4.3483e-07	3.75475e-06
ENSG00000253457	GS1-211B7.1	uncharacterized protein LOC100507341 [Source:RefSeq peptide;Acc:NP_001193776]	-1.60262	0.16554	25.4949	4.43555e-07	3.82786e-06
ENSG00000145293	ENOPH1	enolase-phosphatase 1 [Source:HGNC Symbol;Acc:24599]	0.367287	6.5732	25.4845	4.45941e-07	3.84621e-06
ENSG00000076685	NT5C2	5'-nucleotidase, cytosolic II [Source:HGNC Symbol;Acc:8022]	-0.389704	5.95471	25.4725	4.48733e-07	3.86803e-06
ENSG00000177200	CHD9	chromodomain helicase DNA binding protein 9 [Source:HGNC Symbol;Acc:25701]	-0.327947	7.23375	25.4583	4.52045e-07	3.89432e-06
ENSG00000102309	PIN4	protein (peptidylprolyl cis/trans isomerase) NIMA-interacting, 4 (parvulin) [Source:HGNC Symbol;Acc:8992]	-0.485524	4.95782	25.4498	4.54055e-07	3.90936e-06
ENSG00000213246	SUPT4H1	suppressor of Ty 4 homolog 1 (S. cerevisiae) [Source:HGNC Symbol;Acc:11467]	-0.34462	6.75895	25.4269	4.59472e-07	3.95371e-06
ENSG00000083857	FAT1	FAT tumor suppressor homolog 1 (Drosophila) [Source:HGNC Symbol;Acc:3595]	0.308697	7.56673	25.4118	4.63066e-07	3.98231e-06
ENSG00000171094	ALK	anaplastic lymphoma receptor tyrosine kinase [Source:HGNC Symbol;Acc:427]	0.552472	4.37293	25.3984	4.66304e-07	4.00784e-06
ENSG00000198046	ZNF667	zinc finger protein 667 [Source:HGNC Symbol;Acc:28854]	-0.509761	4.84599	25.3959	4.66908e-07	4.00978e-06
ENSG00000131435	PDLIM4	PDZ and LIM domain 4 [Source:HGNC Symbol;Acc:16501]	0.768358	3.41614	25.3952	4.67072e-07	4.00978e-06
ENSG00000107951	MTPAP	mitochondrial poly(A) polymerase [Source:HGNC Symbol;Acc:25532]	-0.39968	5.92362	25.3835	4.69913e-07	4.03183e-06
ENSG00000070214	SLC44A1	solute carrier family 44, member 1 [Source:HGNC Symbol;Acc:18798]	-0.349959	6.38694	25.3782	4.71201e-07	4.04054e-06
ENSG00000118707	TGIF2	TGFB-induced factor homeobox 2 [Source:HGNC Symbol;Acc:15764]	-0.350273	6.53004	25.3583	4.76109e-07	4.08026e-06
ENSG00000125691	RPL23	ribosomal protein L23 [Source:HGNC Symbol;Acc:10316]	0.259554	9.68701	25.3525	4.77529e-07	4.09006e-06
ENSG00000226525	RPS7P10	ribosomal protein S7 pseudogene 10 [Source:HGNC Symbol;Acc:39903]	0.513198	4.8619	25.3459	4.79163e-07	4.10169e-06
ENSG00000108468	CBX1	chromobox homolog 1 [Source:HGNC Symbol;Acc:1551]	-0.271862	9.78474	25.3422	4.80095e-07	4.10729e-06
ENSG00000154153	FAM134B	family with sequence similarity 134, member B [Source:HGNC Symbol;Acc:25964]	0.785533	3.33389	25.3389	4.809e-07	4.1118e-06
ENSG00000198682	PAPSS2	3'-phosphoadenosine 5'-phosphosulfate synthase 2 [Source:HGNC Symbol;Acc:8604]	-0.899329	2.76424	25.334	4.82136e-07	4.12e-06
ENSG00000197256	KANK2	KN motif and ankyrin repeat domains 2 [Source:HGNC Symbol;Acc:29300]	-0.573381	4.22902	25.3166	4.86502e-07	4.1549e-06
ENSG00000196476	C20orf96	chromosome 20 open reading frame 96 [Source:HGNC Symbol;Acc:16227]	0.560644	4.5518	25.3078	4.88727e-07	4.17151e-06
ENSG00000107581	EIF3A	eukaryotic translation initiation factor 3, subunit A [Source:HGNC Symbol;Acc:3271]	0.257657	9.48863	25.2999	4.90745e-07	4.18632e-06
ENSG00000143379	SETDB1	SET domain, bifurcated 1 [Source:HGNC Symbol;Acc:10761]	-0.303354	7.58365	25.274	4.9736e-07	4.2403e-06
ENSG00000236552	RPL13AP5	ribosomal protein L13a pseudogene 5 [Source:HGNC Symbol;Acc:23736]	0.911973	3.40747	25.2689	4.98689e-07	4.24919e-06
ENSG00000181135	ZNF707	zinc finger protein 707 [Source:HGNC Symbol;Acc:27815]	-0.940019	2.71472	25.2639	4.99969e-07	4.25765e-06
ENSG00000162769	FLVCR1	feline leukemia virus subgroup C cellular receptor 1 [Source:HGNC Symbol;Acc:24682]	0.327668	7.07283	25.2579	5.01532e-07	4.2685e-06
ENSG00000121741	ZMYM2	zinc finger, MYM-type 2 [Source:HGNC Symbol;Acc:12989]	-0.311087	7.71331	25.2545	5.02414e-07	4.27355e-06
ENSG00000165449	SLC16A9	solute carrier family 16, member 9 (monocarboxylic acid transporter 9) [Source:HGNC Symbol;Acc:23520]	0.449531	5.37466	25.2524	5.0297e-07	4.27583e-06
ENSG00000007171	NOS2	nitric oxide synthase 2, inducible [Source:HGNC Symbol;Acc:7873]	-2.64925	-0.240414	25.23	5.0885e-07	4.32208e-06
ENSG00000136044	APPL2	adaptor protein, phosphotyrosine interaction, PH domain and leucine zipper containing 2 [Source:HGNC Symbol;Acc:18242]	-0.435	5.78588	25.2294	5.08995e-07	4.32208e-06
ENSG00000122026	RPL21	ribosomal protein L21 [Source:HGNC Symbol;Acc:10313]	0.274096	8.94798	25.2127	5.13438e-07	4.35731e-06
ENSG00000170296	GABARAP	GABA(A) receptor-associated protein [Source:HGNC Symbol;Acc:4067]	-0.299187	7.51393	25.211	5.13892e-07	4.35866e-06
ENSG00000181754	AMIGO1	adhesion molecule with Ig-like domain 1 [Source:HGNC Symbol;Acc:20824]	-0.757909	3.40753	25.2058	5.15269e-07	4.36784e-06
ENSG00000114391	RPL24	ribosomal protein L24 [Source:HGNC Symbol;Acc:10325]	0.274617	9.04296	25.2035	5.15891e-07	4.37062e-06
ENSG00000117360	PRPF3	PRP3 pre-mRNA processing factor 3 homolog (S. cerevisiae) [Source:HGNC Symbol;Acc:17348]	0.28334	8.37585	25.1963	5.17805e-07	4.38432e-06
ENSG00000186310	NAP1L3	nucleosome assembly protein 1-like 3 [Source:HGNC Symbol;Acc:7639]	-0.492802	4.9858	25.1928	5.18749e-07	4.3898e-06
ENSG00000162600	OMA1	OMA1 zinc metallopeptidase homolog (S. cerevisiae) [Source:HGNC Symbol;Acc:29661]	-0.627634	3.8683	25.1541	5.29282e-07	4.47638e-06
ENSG00000074054	CLASP1	cytoplasmic linker associated protein 1 [Source:HGNC Symbol;Acc:17088]	-0.324136	6.96183	25.1501	5.30363e-07	4.48296e-06
ENSG00000170011	MYRIP	myosin VIIA and Rab interacting protein [Source:HGNC Symbol;Acc:19156]	-0.641301	3.72968	25.1413	5.32794e-07	4.50021e-06
ENSG00000165861	ZFYVE1	zinc finger, FYVE domain containing 1 [Source:HGNC Symbol;Acc:13180]	-0.724986	3.9185	25.1405	5.33011e-07	4.50021e-06
ENSG00000002586	CD99	CD99 molecule [Source:HGNC Symbol;Acc:7082]	-0.501716	4.82307	25.1312	5.35593e-07	4.51943e-06
ENSG00000075539	FRYL	FRY-like [Source:HGNC Symbol;Acc:29127]	-0.308117	7.64575	25.1148	5.40161e-07	4.55538e-06
ENSG00000182256	GABRG3	gamma-aminobutyric acid (GABA) A receptor, gamma 3 [Source:HGNC Symbol;Acc:4088]	1.19952	1.32353	25.0978	5.44939e-07	4.59306e-06
ENSG00000125534	PPDPF	pancreatic progenitor cell differentiation and proliferation factor homolog (zebrafish) [Source:HGNC Symbol;Acc:16142]	-0.765951	3.327	25.0839	5.48895e-07	4.62377e-06
ENSG00000130294	KIF1A	kinesin family member 1A [Source:HGNC Symbol;Acc:888]	0.425625	8.02462	25.0421	5.60911e-07	4.72198e-06
ENSG00000107669	ATE1	arginyltransferase 1 [Source:HGNC Symbol;Acc:782]	-0.447009	5.4248	25.0412	5.61192e-07	4.72198e-06
ENSG00000197622	CDC42SE1	CDC42 small effector 1 [Source:HGNC Symbol;Acc:17719]	0.2941	8.18194	25.0239	5.6623e-07	4.75995e-06
ENSG00000168078	PBK	PDZ binding kinase [Source:HGNC Symbol;Acc:18282]	-0.41155	6.65682	25.0235	5.66347e-07	4.75995e-06
ENSG00000116005	PCYOX1	prenylcysteine oxidase 1 [Source:HGNC Symbol;Acc:20588]	0.420769	5.59309	24.9812	5.78918e-07	4.86284e-06
ENSG00000179818	PCBP1-AS1	PCBP1 antisense RNA 1 [Source:HGNC Symbol;Acc:42948]	0.563496	4.58706	24.9774	5.80052e-07	4.86961e-06
ENSG00000096872	IFT74	intraflagellar transport 74 homolog (Chlamydomonas) [Source:HGNC Symbol;Acc:21424]	-0.534758	4.61331	24.9749	5.80813e-07	4.87323e-06
ENSG00000125630	POLR1B	polymerase (RNA) I polypeptide B, 128kDa [Source:HGNC Symbol;Acc:20454]	0.353181	6.6495	24.9694	5.82468e-07	4.88436e-06
ENSG00000178917	ZNF852	zinc finger protein 852 [Source:HGNC Symbol;Acc:27713]	0.6786	4.18563	24.9625	5.84563e-07	4.89785e-06
ENSG00000076043	REXO2	REX2, RNA exonuclease 2 homolog (S. cerevisiae) [Source:HGNC Symbol;Acc:17851]	-0.618115	4.04758	24.9619	5.84739e-07	4.89785e-06
ENSG00000141458	NPC1	Niemann-Pick disease, type C1 [Source:HGNC Symbol;Acc:7897]	0.484515	5.08393	24.9583	5.85843e-07	4.90432e-06
ENSG00000232821	AC003986.6		0.998999	2.67356	24.9249	5.96084e-07	4.98723e-06
ENSG00000162231	NXF1	nuclear RNA export factor 1 [Source:HGNC Symbol;Acc:8071]	0.353602	6.98631	24.9175	5.98367e-07	5.00351e-06
ENSG00000115841	FAM82A1	family with sequence similarity 82, member A1 [Source:HGNC Symbol;Acc:26567]	-0.956631	2.24372	24.8978	6.04529e-07	5.05219e-06
ENSG00000170144	HNRNPA3	heterogeneous nuclear ribonucleoprotein A3 [Source:HGNC Symbol;Acc:24941]	-0.284004	9.73271	24.8808	6.09873e-07	5.09397e-06
ENSG00000163584	RPL22L1	ribosomal protein L22-like 1 [Source:HGNC Symbol;Acc:27610]	0.306862	8.34879	24.8509	6.19399e-07	5.17062e-06
ENSG00000065135	GNAI3	guanine nucleotide binding protein (G protein), alpha inhibiting activity polypeptide 3 [Source:HGNC Symbol;Acc:4387]	-0.307261	8.0431	24.8431	6.21903e-07	5.1886e-06
ENSG00000154229	PRKCA	protein kinase C, alpha [Source:HGNC Symbol;Acc:9393]	-0.447561	5.42825	24.8232	6.28367e-07	5.23958e-06
ENSG00000111843	TMEM14C	transmembrane protein 14C [Source:HGNC Symbol;Acc:20952]	-0.363223	6.28878	24.8157	6.30811e-07	5.257e-06
ENSG00000153250	RBMS1	RNA binding motif, single stranded interacting protein 1 [Source:HGNC Symbol;Acc:9907]	-0.379083	6.27768	24.812	6.32013e-07	5.26405e-06
ENSG00000129173	E2F8	E2F transcription factor 8 [Source:HGNC Symbol;Acc:24727]	-0.580159	4.22705	24.7927	6.38398e-07	5.31425e-06
ENSG00000148481	FAM188A	family with sequence similarity 188, member A [Source:HGNC Symbol;Acc:23578]	-0.498554	5.22047	24.7822	6.41859e-07	5.34005e-06
ENSG00000144339	TMEFF2	transmembrane protein with EGF-like and two follistatin-like domains 2 [Source:HGNC Symbol;Acc:11867]	-1.17081	1.53758	24.7672	6.469e-07	5.37897e-06
ENSG00000171303	KCNK3	potassium channel, subfamily K, member 3 [Source:HGNC Symbol;Acc:6278]	0.938497	2.37534	24.7654	6.47509e-07	5.38101e-06
ENSG00000015475	BID	BH3 interacting domain death agonist [Source:HGNC Symbol;Acc:1050]	-0.424705	5.50468	24.7585	6.49833e-07	5.39729e-06
ENSG00000148926	ADM	adrenomedullin [Source:HGNC Symbol;Acc:259]	1.69832	0.202132	24.75	6.52697e-07	5.41805e-06
ENSG00000183647	ZNF530	zinc finger protein 530 [Source:HGNC Symbol;Acc:29297]	-0.904178	2.42436	24.7453	6.54267e-07	5.42803e-06
ENSG00000185658	BRWD1	bromodomain and WD repeat domain containing 1 [Source:HGNC Symbol;Acc:12760]	-0.310462	7.54476	24.7403	6.55989e-07	5.43927e-06
ENSG00000162614	NEXN	nexilin (F actin binding protein) [Source:HGNC Symbol;Acc:29557]	-0.794059	3.14778	24.6754	6.78452e-07	5.62238e-06
ENSG00000137486	ARRB1	arrestin, beta 1 [Source:HGNC Symbol;Acc:711]	-0.851281	2.74655	24.6564	6.85172e-07	5.67489e-06
ENSG00000219747	RP1-292B18.1		0.541739	4.77246	24.6358	6.92515e-07	5.73251e-06
ENSG00000162753	SLC9C2	solute carrier family 9, member C2 (putative) [Source:HGNC Symbol;Acc:28664]	-2.196	-0.998985	24.6347	6.92932e-07	5.73276e-06
ENSG00000184465	WDR27	WD repeat domain 27 [Source:HGNC Symbol;Acc:21248]	0.439265	5.81381	24.6222	6.97436e-07	5.7668e-06
ENSG00000155849	ELMO1	engulfment and cell motility 1 [Source:HGNC Symbol;Acc:16286]	-1.31056	1.26351	24.6153	6.99951e-07	5.78436e-06
ENSG00000115457	IGFBP2	insulin-like growth factor binding protein 2, 36kDa [Source:HGNC Symbol;Acc:5471]	0.630099	4.50946	24.61	7.01857e-07	5.79688e-06
ENSG00000140025	EFCAB11	EF-hand calcium binding domain 11 [Source:HGNC Symbol;Acc:20357]	-0.711944	3.09216	24.587	7.10285e-07	5.86321e-06
ENSG00000124193	SRSF6	serine/arginine-rich splicing factor 6 [Source:HGNC Symbol;Acc:10788]	-0.277707	8.66087	24.572	7.15859e-07	5.90594e-06
ENSG00000133878	DUSP26	dual specificity phosphatase 26 (putative) [Source:HGNC Symbol;Acc:28161]	0.705469	4.2554	24.5634	7.1905e-07	5.92896e-06
ENSG00000147162	OGT	O-linked N-acetylglucosamine (GlcNAc) transferase [Source:HGNC Symbol;Acc:8127]	0.283337	8.21574	24.5517	7.23442e-07	5.96186e-06
ENSG00000151491	EPS8	epidermal growth factor receptor pathway substrate 8 [Source:HGNC Symbol;Acc:3420]	-0.51841	4.68985	24.5411	7.27398e-07	5.99112e-06
ENSG00000170312	CDK1	cyclin-dependent kinase 1 [Source:HGNC Symbol;Acc:1722]	-0.329552	7.68226	24.5222	7.34585e-07	6.04695e-06
ENSG00000089199	CHGB	chromogranin B (secretogranin 1) [Source:HGNC Symbol;Acc:1930]	0.452362	5.30793	24.5069	7.40439e-07	6.09067e-06
ENSG00000168005	C11orf84	chromosome 11 open reading frame 84 [Source:HGNC Symbol;Acc:25115]	0.506558	5.77851	24.5062	7.40718e-07	6.09067e-06
ENSG00000106591	MRPL32	mitochondrial ribosomal protein L32 [Source:HGNC Symbol;Acc:14035]	-0.337622	6.74929	24.5039	7.41613e-07	6.09464e-06
ENSG00000167232	ZNF91	zinc finger protein 91 [Source:HGNC Symbol;Acc:13166]	0.448207	5.61424	24.4998	7.43188e-07	6.1042e-06
ENSG00000095002	MSH2	mutS homolog 2, colon cancer, nonpolyposis type 1 (E. coli) [Source:HGNC Symbol;Acc:7325]	-0.297677	7.75159	24.4975	7.44073e-07	6.10808e-06
ENSG00000179051	RCC2	regulator of chromosome condensation 2 [Source:HGNC Symbol;Acc:30297]	-0.338552	6.94702	24.4958	7.44702e-07	6.10986e-06
ENSG00000213326	RPS7P11	ribosomal protein S7 pseudogene 11 [Source:HGNC Symbol;Acc:35841]	0.496883	4.9256	24.4891	7.47331e-07	6.12803e-06
ENSG00000136295	TTYH3	tweety homolog 3 (Drosophila) [Source:HGNC Symbol;Acc:22222]	0.459472	6.54204	24.4718	7.54072e-07	6.17989e-06
ENSG00000075089	ACTR6	ARP6 actin-related protein 6 homolog (yeast) [Source:HGNC Symbol;Acc:24025]	-0.455676	5.8762	24.4601	7.58641e-07	6.21389e-06
ENSG00000136026	CKAP4	cytoskeleton-associated protein 4 [Source:HGNC Symbol;Acc:16991]	0.314544	7.22234	24.4569	7.5992e-07	6.22093e-06
ENSG00000106105	GARS	glycyl-tRNA synthetase [Source:HGNC Symbol;Acc:4162]	0.281818	8.29797	24.45	7.62637e-07	6.23972e-06
ENSG00000081320	STK17B	serine/threonine kinase 17b [Source:HGNC Symbol;Acc:11396]	-0.679028	3.77396	24.4323	7.6966e-07	6.2937e-06
ENSG00000124222	STX16	syntaxin 16 [Source:HGNC Symbol;Acc:11431]	0.350811	6.6364	24.4042	7.80996e-07	6.38288e-06
ENSG00000118508	RAB32	RAB32, member RAS oncogene family [Source:HGNC Symbol;Acc:9772]	-0.73994	3.35527	24.3805	7.90661e-07	6.4583e-06
ENSG00000130054	FAM155B	family with sequence similarity 155, member B [Source:HGNC Symbol;Acc:30701]	0.651427	4.01064	24.3466	8.047e-07	6.56935e-06
ENSG00000233476	EEF1A1P6	eukaryotic translation elongation factor 1 alpha 1 pseudogene 6 [Source:HGNC Symbol;Acc:3201]	0.696532	3.36678	24.2911	8.28188e-07	6.75737e-06
ENSG00000116984	MTR	5-methyltetrahydrofolate-homocysteine methyltransferase [Source:HGNC Symbol;Acc:7468]	-0.297456	7.32528	24.2876	8.29717e-07	6.76613e-06
ENSG00000169814	BTD	biotinidase [Source:HGNC Symbol;Acc:1122]	-0.888673	2.11346	24.2417	8.4971e-07	6.92535e-06
ENSG00000135821	GLUL	glutamate-ammonia ligase [Source:HGNC Symbol;Acc:4341]	0.281892	8.07735	24.2402	8.5037e-07	6.92691e-06
ENSG00000088387	DOCK9	dedicator of cytokinesis 9 [Source:HGNC Symbol;Acc:14132]	-0.535683	4.74789	24.2297	8.55048e-07	6.96119e-06
ENSG00000204394	VARS	valyl-tRNA synthetase [Source:HGNC Symbol;Acc:12651]	0.406269	7.28128	24.2233	8.57889e-07	6.98049e-06
ENSG00000234797	RPS3AP6	ribosomal protein S3A pseudogene 6 [Source:HGNC Symbol;Acc:18630]	0.460726	5.33862	24.2221	8.58432e-07	6.98106e-06
ENSG00000186522	SEPT10	septin 10 [Source:HGNC Symbol;Acc:14349]	-0.43565	5.73037	24.2081	8.64688e-07	7.02808e-06
ENSG00000187231	SESTD1	SEC14 and spectrin domains 1 [Source:HGNC Symbol;Acc:18379]	-0.459005	5.17184	24.1861	8.74592e-07	7.10468e-06
ENSG00000214105	CTD-2116F7.1		-1.0491	1.89598	24.1797	8.77517e-07	7.12454e-06
ENSG00000173451	THAP2	THAP domain containing, apoptosis associated protein 2 [Source:HGNC Symbol;Acc:20854]	0.73196	4.58922	24.1643	8.84568e-07	7.17784e-06
ENSG00000178397	FAM220A	family with sequence similarity 220, member A [Source:HGNC Symbol;Acc:22422]	0.500346	4.70555	24.149	8.91625e-07	7.23114e-06
ENSG00000126953	TIMM8A	translocase of inner mitochondrial membrane 8 homolog A (yeast) [Source:HGNC Symbol;Acc:11817]	0.502468	4.99936	24.1469	8.92579e-07	7.23493e-06
ENSG00000011347	SYT7	synaptotagmin VII [Source:HGNC Symbol;Acc:11514]	0.692365	3.31529	24.1308	9.00082e-07	7.29174e-06
ENSG00000149295	DRD2	dopamine receptor D2 [Source:HGNC Symbol;Acc:3023]	1.20619	1.13399	24.1127	9.08606e-07	7.35677e-06
ENSG00000244313	RP11-425L10.1		0.400201	6.03536	24.1014	9.13927e-07	7.39582e-06
ENSG00000164889	SLC4A2	solute carrier family 4, anion exchanger, member 2 (erythrocyte membrane protein band 3-like 1) [Source:HGNC Symbol;Acc:11028]	0.495631	5.96461	24.0803	9.24005e-07	7.47041e-06
ENSG00000132963	POMP	proteasome maturation protein [Source:HGNC Symbol;Acc:20330]	-0.335887	7.11482	24.08	9.24153e-07	7.47041e-06
ENSG00000234722	AC073236.3		1.10616	2.51924	24.0771	9.25526e-07	7.47743e-06
ENSG00000139644	TMBIM6	transmembrane BAX inhibitor motif containing 6 [Source:HGNC Symbol;Acc:11723]	-0.278873	8.21533	24.0633	9.32224e-07	7.52743e-06
ENSG00000140575	IQGAP1	IQ motif containing GTPase activating protein 1 [Source:HGNC Symbol;Acc:6110]	-0.293883	7.78211	24.0573	9.3509e-07	7.54645e-06
ENSG00000149636	DSN1	DSN1, MIND kinetochore complex component, homolog (S. cerevisiae) [Source:HGNC Symbol;Acc:16165]	-0.390385	5.78587	24.0424	9.42369e-07	7.60106e-06
ENSG00000135457	TFCP2	transcription factor CP2 [Source:HGNC Symbol;Acc:11748]	-0.32378	6.75137	24.0398	9.43624e-07	7.60704e-06
ENSG00000162434	JAK1	Janus kinase 1 [Source:HGNC Symbol;Acc:6190]	-0.352808	6.2708	24.0341	9.46424e-07	7.62546e-06
ENSG00000167085	PHB	prohibitin [Source:HGNC Symbol;Acc:8912]	0.314462	7.67519	24.0268	9.50061e-07	7.6506e-06
ENSG00000127884	ECHS1	enoyl CoA hydratase, short chain, 1, mitochondrial [Source:HGNC Symbol;Acc:3151]	-0.418028	5.76802	24.0038	9.6144e-07	7.73802e-06
ENSG00000157404	KIT	v-kit Hardy-Zuckerman 4 feline sarcoma viral oncogene homolog [Source:HGNC Symbol;Acc:6342]	0.476659	4.89614	23.9935	9.66603e-07	7.77535e-06
ENSG00000085788	DDHD2	DDHD domain containing 2 [Source:HGNC Symbol;Acc:29106]	-0.39539	6.56733	23.9839	9.71451e-07	7.8101e-06
ENSG00000106588	PSMA2	proteasome (prosome, macropain) subunit, alpha type, 2 [Source:HGNC Symbol;Acc:9531]	-0.587378	4.32522	23.9677	9.7964e-07	7.87167e-06
ENSG00000171843	MLLT3	myeloid/lymphoid or mixed-lineage leukemia (trithorax homolog, Drosophila); translocated to, 3 [Source:HGNC Symbol;Acc:7136]	0.454669	5.36567	23.9556	9.85819e-07	7.91702e-06
ENSG00000206120	EGFEM1P	EGF-like and EMI domain containing 1, pseudogene [Source:HGNC Symbol;Acc:25149]	1.65793	0.855615	23.9329	9.97544e-07	8.00684e-06
ENSG00000013588	GPRC5A	G protein-coupled receptor, family C, group 5, member A [Source:HGNC Symbol;Acc:9836]	-1.09841	1.5245	23.8977	1.01594e-06	8.15006e-06
ENSG00000129824	RPS4Y1	ribosomal protein S4, Y-linked 1 [Source:HGNC Symbol;Acc:10425]	0.271092	8.29244	23.8854	1.02242e-06	8.19765e-06
ENSG00000143067	ZNF697	zinc finger protein 697 [Source:HGNC Symbol;Acc:32034]	0.450335	5.2562	23.8576	1.0373e-06	8.31209e-06
ENSG00000018189	RUFY3	RUN and FYVE domain containing 3 [Source:HGNC Symbol;Acc:30285]	-0.389891	6.17595	23.8567	1.03782e-06	8.31209e-06
ENSG00000141646	SMAD4	SMAD family member 4 [Source:HGNC Symbol;Acc:6770]	-0.305832	7.25956	23.8407	1.04647e-06	8.37682e-06
ENSG00000203897	RP11-475E11.5		-0.900171	2.54253	23.8394	1.04714e-06	8.37771e-06
ENSG00000256377	RP11-1060J15.4		-1.08387	1.61089	23.8187	1.05848e-06	8.46282e-06
ENSG00000117450	PRDX1	peroxiredoxin 1 [Source:HGNC Symbol;Acc:9352]	-0.253931	9.20138	23.8175	1.05917e-06	8.46282e-06
ENSG00000116396	KCNC4	potassium voltage-gated channel, Shaw-related subfamily, member 4 [Source:HGNC Symbol;Acc:6236]	-0.718278	3.29916	23.8169	1.0595e-06	8.46282e-06
ENSG00000169783	LINGO1	leucine rich repeat and Ig domain containing 1 [Source:HGNC Symbol;Acc:21205]	-1.0513	1.94835	23.8069	1.06502e-06	8.50233e-06
ENSG00000133056	PIK3C2B	phosphatidylinositol-4-phosphate 3-kinase, catalytic subunit type 2 beta [Source:HGNC Symbol;Acc:8972]	0.503404	5.40042	23.7743	1.08317e-06	8.64263e-06
ENSG00000135049	AGTPBP1	ATP/GTP binding protein 1 [Source:HGNC Symbol;Acc:17258]	-0.335437	6.77393	23.7699	1.08569e-06	8.65804e-06
ENSG00000137601	NEK1	NIMA (never in mitosis gene a)-related kinase 1 [Source:HGNC Symbol;Acc:7744]	-0.375143	6.23341	23.7501	1.09689e-06	8.74261e-06
ENSG00000141562	NARF	nuclear prelamin A recognition factor [Source:HGNC Symbol;Acc:29916]	-0.361653	6.48155	23.7304	1.10821e-06	8.8281e-06
ENSG00000106404	CLDN15	claudin 15 [Source:HGNC Symbol;Acc:2036]	0.919794	3.01068	23.7264	1.1105e-06	8.84159e-06
ENSG00000158604	TMED4	transmembrane emp24 protein transport domain containing 4 [Source:HGNC Symbol;Acc:22301]	0.344773	6.43508	23.7114	1.1192e-06	8.90609e-06
ENSG00000116641	DOCK7	dedicator of cytokinesis 7 [Source:HGNC Symbol;Acc:19190]	-0.307973	7.42671	23.7098	1.12008e-06	8.90831e-06
ENSG00000165973	NELL1	NEL-like 1 (chicken) [Source:HGNC Symbol;Acc:7750]	-0.740703	3.44596	23.694	1.12937e-06	8.97735e-06
ENSG00000143971	ETAA1	Ewing tumor-associated antigen 1 [Source:HGNC Symbol;Acc:24648]	-0.413316	5.68439	23.6852	1.13454e-06	9.01362e-06
ENSG00000145386	CCNA2	cyclin A2 [Source:HGNC Symbol;Acc:1578]	-0.325785	7.13246	23.6609	1.14895e-06	9.12319e-06
ENSG00000172638	EFEMP2	EGF containing fibulin-like extracellular matrix protein 2 [Source:HGNC Symbol;Acc:3219]	-0.960101	2.09663	23.6407	1.16104e-06	9.21429e-06
ENSG00000167196	FBXO22	F-box protein 22 [Source:HGNC Symbol;Acc:13593]	0.323298	7.11832	23.6335	1.16539e-06	9.24385e-06
ENSG00000237976	RP11-126K1.6		-0.735911	2.80088	23.5669	1.20648e-06	9.56465e-06
ENSG00000221983	UBA52	ubiquitin A-52 residue ribosomal protein fusion product 1 [Source:HGNC Symbol;Acc:12458]	0.291874	8.52556	23.5496	1.21737e-06	9.64578e-06
ENSG00000147677	EIF3H	eukaryotic translation initiation factor 3, subunit H [Source:HGNC Symbol;Acc:3273]	0.279929	8.0143	23.5481	1.21827e-06	9.64779e-06
ENSG00000007392	LUC7L	LUC7-like (S. cerevisiae) [Source:HGNC Symbol;Acc:6723]	0.369798	6.77266	23.5432	1.22141e-06	9.66745e-06
ENSG00000121486	TRMT1L	tRNA methyltransferase 1 homolog (S. cerevisiae)-like [Source:HGNC Symbol;Acc:16782]	0.406391	5.75311	23.5342	1.22711e-06	9.70739e-06
ENSG00000103647	CORO2B	coronin, actin binding protein, 2B [Source:HGNC Symbol;Acc:2256]	-0.858452	2.21085	23.5319	1.2286e-06	9.71399e-06
ENSG00000128951	DUT	deoxyuridine triphosphatase [Source:HGNC Symbol;Acc:3078]	-0.334111	7.16685	23.5169	1.2382e-06	9.78465e-06
ENSG00000120800	UTP20	UTP20, small subunit (SSU) processome component, homolog (yeast) [Source:HGNC Symbol;Acc:17897]	0.287853	7.94874	23.5066	1.24487e-06	9.83215e-06
ENSG00000140403	DNAJA4	DnaJ (Hsp40) homolog, subfamily A, member 4 [Source:HGNC Symbol;Acc:14885]	1.2246	1.13251	23.5006	1.24873e-06	9.8574e-06
ENSG00000178913	TAF7	TAF7 RNA polymerase II, TATA box binding protein (TBP)-associated factor, 55kDa [Source:HGNC Symbol;Acc:11541]	0.273922	8.30183	23.4943	1.25282e-06	9.88443e-06
ENSG00000159592	GPBP1L1	GC-rich promoter binding protein 1-like 1 [Source:HGNC Symbol;Acc:28843]	-0.357404	6.54878	23.4872	1.25745e-06	9.91561e-06
ENSG00000112983	BRD8	bromodomain containing 8 [Source:HGNC Symbol;Acc:19874]	-0.330312	6.70716	23.4822	1.26077e-06	9.93653e-06
ENSG00000153933	DGKE	diacylglycerol kinase, epsilon 64kDa [Source:HGNC Symbol;Acc:2852]	0.418137	5.46936	23.4781	1.26343e-06	9.95222e-06
ENSG00000162851	TFB2M	transcription factor B2, mitochondrial [Source:HGNC Symbol;Acc:18559]	-0.417198	5.66036	23.4158	1.305e-06	1.02742e-05
ENSG00000244567	AC096772.6		-1.02139	2.17009	23.4025	1.31409e-06	1.03403e-05
ENSG00000164111	ANXA5	annexin A5 [Source:HGNC Symbol;Acc:543]	-0.340173	6.51577	23.3961	1.31846e-06	1.03692e-05
ENSG00000066735	KIF26A	kinesin family member 26A [Source:HGNC Symbol;Acc:20226]	-0.55949	5.93857	23.3879	1.32407e-06	1.04077e-05
ENSG00000160783	PMF1	polyamine-modulated factor 1 [Source:HGNC Symbol;Acc:9112]	-0.490049	4.97945	23.3859	1.3255e-06	1.04134e-05
ENSG00000164742	ADCY1	adenylate cyclase 1 (brain) [Source:HGNC Symbol;Acc:232]	0.351496	6.60017	23.3633	1.34114e-06	1.05307e-05
ENSG00000117614	SYF2	SYF2 homolog, RNA splicing factor (S. cerevisiae) [Source:HGNC Symbol;Acc:19824]	-0.409261	5.88993	23.3495	1.35081e-06	1.06011e-05
ENSG00000170412	GPRC5C	G protein-coupled receptor, family C, group 5, member C [Source:HGNC Symbol;Acc:13309]	-0.927382	2.79128	23.3191	1.37233e-06	1.07642e-05
ENSG00000104093	DMXL2	Dmx-like 2 [Source:HGNC Symbol;Acc:2938]	0.272165	8.46188	23.3125	1.37701e-06	1.07952e-05
ENSG00000118432	CNR1	cannabinoid receptor 1 (brain) [Source:HGNC Symbol;Acc:2159]	-0.45427	5.10124	23.3109	1.3782e-06	1.07988e-05
ENSG00000172009	THOP1	thimet oligopeptidase 1 [Source:HGNC Symbol;Acc:11793]	0.557154	5.51174	23.2931	1.39101e-06	1.08934e-05
ENSG00000068784	SRBD1	S1 RNA binding domain 1 [Source:HGNC Symbol;Acc:25521]	-0.466246	5.05491	23.288	1.39467e-06	1.09163e-05
ENSG00000103449	SALL1	sal-like 1 (Drosophila) [Source:HGNC Symbol;Acc:10524]	-0.624372	3.86663	23.2631	1.41288e-06	1.1053e-05
ENSG00000091542	ALKBH5	alkB, alkylation repair homolog 5 (E. coli) [Source:HGNC Symbol;Acc:25996]	0.378775	6.34215	23.2523	1.42079e-06	1.1109e-05
ENSG00000154845	PPP4R1	protein phosphatase 4, regulatory subunit 1 [Source:HGNC Symbol;Acc:9320]	-0.324056	6.66846	23.2487	1.42346e-06	1.1124e-05
ENSG00000198246	SLC29A3	solute carrier family 29 (nucleoside transporters), member 3 [Source:HGNC Symbol;Acc:23096]	-0.913079	2.27687	23.2439	1.427e-06	1.11458e-05
ENSG00000160469	BRSK1	BR serine/threonine kinase 1 [Source:HGNC Symbol;Acc:18994]	0.586451	4.97461	23.2383	1.43121e-06	1.11728e-05
ENSG00000105058	FAM32A	family with sequence similarity 32, member A [Source:HGNC Symbol;Acc:24563]	-0.343306	6.36504	23.2117	1.4511e-06	1.13221e-05
ENSG00000017797	RALBP1	ralA binding protein 1 [Source:HGNC Symbol;Acc:9841]	-0.336329	6.5183	23.1726	1.48092e-06	1.15487e-05
ENSG00000136490	LIMD2	LIM domain containing 2 [Source:HGNC Symbol;Acc:28142]	-0.493942	5.78966	23.1668	1.48539e-06	1.15774e-05
ENSG00000124596	C6orf130	chromosome 6 open reading frame 130 [Source:HGNC Symbol;Acc:21257]	-0.53324	4.9621	23.1647	1.48699e-06	1.15839e-05
ENSG00000071859	FAM50A	family with sequence similarity 50, member A [Source:HGNC Symbol;Acc:18786]	0.391896	5.99772	23.1629	1.4884e-06	1.15887e-05
ENSG00000196422	PPP1R26	protein phosphatase 1, regulatory subunit 26 [Source:HGNC Symbol;Acc:29089]	-0.765321	3.77882	23.1509	1.49776e-06	1.16554e-05
ENSG00000138750	NUP54	nucleoporin 54kDa [Source:HGNC Symbol;Acc:17359]	-0.381929	6.6882	23.1362	1.50926e-06	1.17388e-05
ENSG00000166439	RNF169	ring finger protein 169 [Source:HGNC Symbol;Acc:26961]	0.363629	6.12668	23.1301	1.51401e-06	1.17695e-05
ENSG00000168743	NPNT	nephronectin [Source:HGNC Symbol;Acc:27405]	1.63558	0.692467	23.1153	1.5257e-06	1.18542e-05
ENSG00000127314	RAP1B	RAP1B, member of RAS oncogene family [Source:HGNC Symbol;Acc:9857]	-0.412703	5.97092	23.0941	1.54262e-06	1.19794e-05
ENSG00000163872	YEATS2	YEATS domain containing 2 [Source:HGNC Symbol;Acc:25489]	0.318266	7.1638	23.093	1.54354e-06	1.19802e-05
ENSG00000107105	ELAVL2	ELAV (embryonic lethal, abnormal vision, Drosophila)-like 2 (Hu antigen B) [Source:HGNC Symbol;Acc:3313]	0.295489	7.50041	23.0553	1.5741e-06	1.2211e-05
ENSG00000136937	NCBP1	nuclear cap binding protein subunit 1, 80kDa [Source:HGNC Symbol;Acc:7658]	0.293303	7.64349	23.0494	1.57891e-06	1.22419e-05
ENSG00000166206	GABRB3	gamma-aminobutyric acid (GABA) A receptor, beta 3 [Source:HGNC Symbol;Acc:4083]	0.279614	7.81978	23.0304	1.59463e-06	1.23574e-05
ENSG00000071967	CYBRD1	cytochrome b reductase 1 [Source:HGNC Symbol;Acc:20797]	-0.631458	3.49725	23.0178	1.60511e-06	1.24321e-05
ENSG00000102385	DRP2	dystrophin related protein 2 [Source:HGNC Symbol;Acc:3032]	1.05082	1.81368	23.0049	1.61589e-06	1.2509e-05
ENSG00000179598	PLD6	phospholipase D family, member 6 [Source:HGNC Symbol;Acc:30447]	0.465997	5.16063	23.0025	1.61788e-06	1.25179e-05
ENSG00000146263	MMS22L	MMS22-like, DNA repair protein [Source:HGNC Symbol;Acc:21475]	-0.37245	5.99015	22.9907	1.62783e-06	1.25883e-05
ENSG00000100242	SUN2	Sad1 and UNC84 domain containing 2 [Source:HGNC Symbol;Acc:14210]	-0.610552	4.17479	22.9862	1.63171e-06	1.26117e-05
ENSG00000143842	SOX13	SRY (sex determining region Y)-box 13 [Source:HGNC Symbol;Acc:11192]	-1.61886	0.0952095	22.9121	1.69579e-06	1.31002e-05
ENSG00000137496	IL18BP	interleukin 18 binding protein [Source:HGNC Symbol;Acc:5987]	0.737679	3.47327	22.8988	1.70757e-06	1.31843e-05
ENSG00000185664	PMEL	premelanosome protein [Source:HGNC Symbol;Acc:10880]	1.14232	1.56828	22.8847	1.72015e-06	1.32744e-05
ENSG00000011028	MRC2	mannose receptor, C type 2 [Source:HGNC Symbol;Acc:16875]	0.711862	3.66475	22.8834	1.72131e-06	1.32765e-05
ENSG00000124406	ATP8A1	ATPase, aminophospholipid transporter (APLT), class I, type 8A, member 1 [Source:HGNC Symbol;Acc:13531]	0.344042	6.3299	22.8659	1.73704e-06	1.33908e-05
ENSG00000171517	LPAR3	lysophosphatidic acid receptor 3 [Source:HGNC Symbol;Acc:14298]	0.465733	4.91774	22.8484	1.75295e-06	1.35064e-05
ENSG00000148843	PDCD11	programmed cell death 11 [Source:HGNC Symbol;Acc:13408]	0.318485	7.38619	22.837	1.76341e-06	1.358e-05
ENSG00000153234	NR4A2	nuclear receptor subfamily 4, group A, member 2 [Source:HGNC Symbol;Acc:7981]	-1.00464	1.60663	22.8297	1.77012e-06	1.36246e-05
ENSG00000174807	CD248	CD248 molecule, endosialin [Source:HGNC Symbol;Acc:18219]	1.08762	2.09564	22.8177	1.78116e-06	1.37024e-05
ENSG00000214110	LDHAP4	lactate dehydrogenase A pseudogene 4 [Source:HGNC Symbol;Acc:6539]	0.511877	4.48475	22.8061	1.79199e-06	1.37786e-05
ENSG00000149972	CNTN5	contactin 5 [Source:HGNC Symbol;Acc:2175]	-0.500313	4.85155	22.8041	1.79386e-06	1.37859e-05
ENSG00000250467	RP11-227F19.1		-0.826374	2.34723	22.7952	1.80212e-06	1.38421e-05
ENSG00000158711	ELK4	ELK4, ETS-domain protein (SRF accessory protein 1) [Source:HGNC Symbol;Acc:3326]	0.349615	6.44003	22.7522	1.84291e-06	1.41481e-05
ENSG00000165507	C10orf10	chromosome 10 open reading frame 10 [Source:HGNC Symbol;Acc:23355]	-1.71633	0.308172	22.7456	1.84927e-06	1.41896e-05
ENSG00000101310	SEC23B	Sec23 homolog B (S. cerevisiae) [Source:HGNC Symbol;Acc:10702]	0.321114	6.78146	22.7211	1.87305e-06	1.43646e-05
ENSG00000135297	MTO1	mitochondrial translation optimization 1 homolog (S. cerevisiae) [Source:HGNC Symbol;Acc:19261]	0.431792	5.29645	22.7111	1.88274e-06	1.44314e-05
ENSG00000149930	TAOK2	TAO kinase 2 [Source:HGNC Symbol;Acc:16835]	0.497077	5.68394	22.7095	1.88437e-06	1.44365e-05
ENSG00000241781	AL161626.1		-0.721453	4.38288	22.6631	1.93042e-06	1.47816e-05
ENSG00000253368	TRNP1	TMF1-regulated nuclear protein 1 [Source:HGNC Symbol;Acc:34348]	-1.70363	0.0356586	22.6559	1.93768e-06	1.48295e-05
ENSG00000137054	POLR1E	polymerase (RNA) I polypeptide E, 53kDa [Source:HGNC Symbol;Acc:17631]	0.368835	5.89392	22.6517	1.94191e-06	1.48542e-05
ENSG00000181826	RELL1	RELT-like 1 [Source:HGNC Symbol;Acc:27379]	-1.0737	1.43642	22.6333	1.96055e-06	1.4989e-05
ENSG00000188895	MSL1	male-specific lethal 1 homolog (Drosophila) [Source:HGNC Symbol;Acc:27905]	0.305971	7.39938	22.6096	1.98493e-06	1.51676e-05
ENSG00000213639	PPP1CB	protein phosphatase 1, catalytic subunit, beta isozyme [Source:HGNC Symbol;Acc:9282]	-0.332893	7.55629	22.6082	1.9863e-06	1.51701e-05
ENSG00000138760	SCARB2	scavenger receptor class B, member 2 [Source:HGNC Symbol;Acc:1665]	-0.278117	8.67133	22.6073	1.9873e-06	1.51701e-05
ENSG00000136045	PWP1	PWP1 homolog (S. cerevisiae) [Source:HGNC Symbol;Acc:17015]	-0.329165	6.91384	22.6037	1.99105e-06	1.51909e-05
ENSG00000136518	ACTL6A	actin-like 6A [Source:HGNC Symbol;Acc:24124]	-0.315643	7.09441	22.6021	1.99262e-06	1.5195e-05
ENSG00000109738	GLRB	glycine receptor, beta [Source:HGNC Symbol;Acc:4329]	0.707409	3.71575	22.5966	1.99838e-06	1.52311e-05
ENSG00000158445	KCNB1	potassium voltage-gated channel, Shab-related subfamily, member 1 [Source:HGNC Symbol;Acc:6231]	-0.847966	2.71217	22.5893	2.00604e-06	1.52816e-05
ENSG00000070087	PFN2	profilin 2 [Source:HGNC Symbol;Acc:8882]	-0.275825	8.2258	22.5707	2.02552e-06	1.54221e-05
ENSG00000167978	SRRM2	serine/arginine repetitive matrix 2 [Source:HGNC Symbol;Acc:16639]	0.298316	9.69002	22.555	2.04208e-06	1.55331e-05
ENSG00000104964	AES	amino-terminal enhancer of split [Source:HGNC Symbol;Acc:307]	-0.3543	6.78156	22.5549	2.0422e-06	1.55331e-05
ENSG00000110811	LEPREL2	leprecan-like 2 [Source:HGNC Symbol;Acc:19318]	0.669434	4.03839	22.5273	2.07176e-06	1.57498e-05
ENSG00000019505	SYT13	synaptotagmin XIII [Source:HGNC Symbol;Acc:14962]	-0.953747	1.90763	22.5175	2.0824e-06	1.58226e-05
ENSG00000169604	ANTXR1	anthrax toxin receptor 1 [Source:HGNC Symbol;Acc:21014]	-0.228157	11.087	22.5053	2.09561e-06	1.59148e-05
ENSG00000165813	C10orf118	chromosome 10 open reading frame 118 [Source:HGNC Symbol;Acc:24349]	-0.606993	4.06337	22.4887	2.11382e-06	1.60449e-05
ENSG00000106003	LFNG	LFNG O-fucosylpeptide 3-beta-N-acetylglucosaminyltransferase [Source:HGNC Symbol;Acc:6560]	-0.754635	2.75191	22.4764	2.12746e-06	1.61402e-05
ENSG00000144283	PKP4	plakophilin 4 [Source:HGNC Symbol;Acc:9026]	0.360087	6.09083	22.4575	2.14848e-06	1.62913e-05
ENSG00000162408	NOL9	nucleolar protein 9 [Source:HGNC Symbol;Acc:26265]	-0.456209	5.10837	22.4387	2.16963e-06	1.64432e-05
ENSG00000120742	SERP1	stress-associated endoplasmic reticulum protein 1 [Source:HGNC Symbol;Acc:10759]	0.307937	7.57147	22.4264	2.18354e-06	1.65402e-05
ENSG00000182504	CEP97	centrosomal protein 97kDa [Source:HGNC Symbol;Acc:26244]	-0.436357	5.49289	22.4197	2.19112e-06	1.65891e-05
ENSG00000163428	LRRC58	leucine rich repeat containing 58 [Source:HGNC Symbol;Acc:26968]	0.3057	7.34389	22.4179	2.19325e-06	1.65968e-05
ENSG00000116752	BCAS2	breast carcinoma amplified sequence 2 [Source:HGNC Symbol;Acc:975]	-0.318685	6.95609	22.4082	2.20426e-06	1.66687e-05
ENSG00000176182	MYPOP	Myb-related transcription factor, partner of profilin [Source:HGNC Symbol;Acc:20178]	1.03251	2.03226	22.4076	2.20501e-06	1.66687e-05
ENSG00000165650	PDZD8	PDZ domain containing 8 [Source:HGNC Symbol;Acc:26974]	0.354464	6.26022	22.3963	2.21805e-06	1.67587e-05
ENSG00000260260	RP11-304L19.5		0.777765	3.03942	22.3901	2.22523e-06	1.68044e-05
ENSG00000155111	CDK19	cyclin-dependent kinase 19 [Source:HGNC Symbol;Acc:19338]	-0.400069	5.90899	22.3811	2.23562e-06	1.68743e-05
ENSG00000164484	TMEM200A	transmembrane protein 200A [Source:HGNC Symbol;Acc:21075]	0.615964	4.18997	22.3549	2.26631e-06	1.70972e-05
ENSG00000087087	SRRT	serrate RNA effector molecule homolog (Arabidopsis) [Source:HGNC Symbol;Acc:24101]	0.34004	7.47716	22.3537	2.26776e-06	1.70994e-05
ENSG00000119541	VPS4B	vacuolar protein sorting 4 homolog B (S. cerevisiae) [Source:HGNC Symbol;Acc:10895]	-0.36493	6.18972	22.3346	2.29045e-06	1.72617e-05
ENSG00000217165	ANKRD18EP	ankyrin repeat domain 18E, pseudogene [Source:HGNC Symbol;Acc:43609]	-0.802467	2.76972	22.3223	2.30509e-06	1.73632e-05
ENSG00000151490	PTPRO	protein tyrosine phosphatase, receptor type, O [Source:HGNC Symbol;Acc:9678]	0.499222	4.63966	22.306	2.3248e-06	1.75028e-05
ENSG00000147364	FBXO25	F-box protein 25 [Source:HGNC Symbol;Acc:13596]	-0.567255	3.95483	22.2934	2.34004e-06	1.76086e-05
ENSG00000140983	RHOT2	ras homolog family member T2 [Source:HGNC Symbol;Acc:21169]	0.504816	5.74628	22.2827	2.35313e-06	1.76981e-05
ENSG00000196814	FAM125B	family with sequence similarity 125, member B [Source:HGNC Symbol;Acc:23368]	-0.460781	4.98257	22.2807	2.35557e-06	1.77074e-05
ENSG00000067113	PPAP2A	phosphatidic acid phosphatase type 2A [Source:HGNC Symbol;Acc:9228]	-0.736657	3.08067	22.2761	2.36125e-06	1.77411e-05
ENSG00000157827	FMNL2	formin-like 2 [Source:HGNC Symbol;Acc:18267]	0.282922	7.53106	22.2581	2.38353e-06	1.78994e-05
ENSG00000114999	TTL	tubulin tyrosine ligase [Source:HGNC Symbol;Acc:21586]	-0.29071	7.22201	22.2431	2.40227e-06	1.8031e-05
ENSG00000170293	CMTM8	CKLF-like MARVEL transmembrane domain containing 8 [Source:HGNC Symbol;Acc:19179]	1.08917	1.72819	22.2365	2.41043e-06	1.80831e-05
ENSG00000157514	TSC22D3	TSC22 domain family, member 3 [Source:HGNC Symbol;Acc:3051]	-0.55019	4.61972	22.2112	2.44243e-06	1.83139e-05
ENSG00000156313	RPGR	retinitis pigmentosa GTPase regulator [Source:HGNC Symbol;Acc:10295]	-0.569314	4.11873	22.208	2.44656e-06	1.83356e-05
ENSG00000151014	CCRN4L	CCR4 carbon catabolite repression 4-like (S. cerevisiae) [Source:HGNC Symbol;Acc:14254]	0.718433	3.12318	22.2031	2.45275e-06	1.83727e-05
ENSG00000166402	TUB	tubby homolog (mouse) [Source:HGNC Symbol;Acc:12406]	0.276148	7.67795	22.1948	2.46342e-06	1.84433e-05
ENSG00000168938	PPIC	peptidylprolyl isomerase C (cyclophilin C) [Source:HGNC Symbol;Acc:9256]	-0.884362	2.26239	22.1672	2.4991e-06	1.87009e-05
ENSG00000137815	RTF1	Rtf1, Paf1/RNA polymerase II complex component, homolog (S. cerevisiae) [Source:HGNC Symbol;Acc:28996]	-0.29119	7.34554	22.1292	2.54909e-06	1.90654e-05
ENSG00000197054	ZNF763	zinc finger protein 763 [Source:HGNC Symbol;Acc:27614]	-1.5578	0.597424	22.127	2.552e-06	1.9071e-05
ENSG00000151779	NBAS	neuroblastoma amplified sequence [Source:HGNC Symbol;Acc:15625]	-0.209891	11.781	22.1266	2.55242e-06	1.9071e-05
ENSG00000197892	KIF13B	kinesin family member 13B [Source:HGNC Symbol;Acc:14405]	-0.724053	2.96248	22.0888	2.60329e-06	1.94413e-05
ENSG00000163257	DCAF16	DDB1 and CUL4 associated factor 16 [Source:HGNC Symbol;Acc:25987]	-0.378763	6.59307	22.0753	2.62158e-06	1.9568e-05
ENSG00000143374	TARS2	threonyl-tRNA synthetase 2, mitochondrial (putative) [Source:HGNC Symbol;Acc:30740]	-0.301864	7.27463	22.055	2.64948e-06	1.97663e-05
ENSG00000119711	ALDH6A1	aldehyde dehydrogenase 6 family, member A1 [Source:HGNC Symbol;Acc:7179]	-0.543789	4.19258	22.0293	2.68523e-06	2.00229e-05
ENSG00000184117	NIPSNAP1	nipsnap homolog 1 (C. elegans) [Source:HGNC Symbol;Acc:7827]	-0.344907	6.33921	22.0252	2.69098e-06	2.00558e-05
ENSG00000236780	AC078941.1		-0.620899	3.5945	22.0186	2.70025e-06	2.01147e-05
ENSG00000196449	YRDC	yrdC domain containing (E. coli) [Source:HGNC Symbol;Acc:28905]	0.433271	5.32958	22.015	2.7053e-06	2.01422e-05
ENSG00000168906	MAT2A	methionine adenosyltransferase II, alpha [Source:HGNC Symbol;Acc:6904]	0.245599	9.38985	22.0133	2.70761e-06	2.01492e-05
ENSG00000118160	SLC8A2	solute carrier family 8 (sodium/calcium exchanger), member 2 [Source:HGNC Symbol;Acc:11069]	1.5006	1.4973	22.0003	2.72605e-06	2.02763e-05
[truncated: 3,661 more rows]
