# Supplementary material for: GSK3 Inhibitors Regulate MYCN mRNA Levels and Reduce Neuroblastoma Cell Viability through Multiple Mechanisms, Including p53 and Wnt Signaling
Source: Oxford University Press journal article supplement (doi:10.1158/1535-7163.mct-13-0560-t), 2013-11-27
Supplement: 15357163mct130560t-sup-tab_4d.xlsx [file 15357163mct130560t-sup-tab_4d.xlsx]

## Sheet: imr32-c.vs.li.txt
Sample Info:	IMR32 cells. Control Vs. 24h LiCl
Sequencing:	Illumina GA IIx, read length: 42 bp, paired-end mRNA sequencing
Mapping:	aligned with TopHat v2.0.7 to GRCh37 (hg19)
Summarization:	Htseq-count
Method for differential gene expression analysis:	General linear model (GLM) in edgeR (R/bioconductor) based on filtered count data, fit: ~treatment
Multiple testing correction:	Benjamini-Hochberg
Gene expression unit:	CPMkb: counts per million per genelength in kilobases
Table:	Differentially expressed genes: Li vs Control
Ensembl ID	Gene Symbol	Description	log2FC	logCPM	LR	PValue	Corrected Pvalue
ENSG00000099250	NRP1	neuropilin 1 [Source:HGNC Symbol;Acc:8004]	2.62006	6.92593	1165.23	2.19263e-255	3.24706e-251
ENSG00000145632	PLK2	polo-like kinase 2 [Source:HGNC Symbol;Acc:19699]	2.71032	6.31986	1153.03	9.83197e-253	7.28008e-249
ENSG00000124762	CDKN1A	cyclin-dependent kinase inhibitor 1A (p21, Cip1) [Source:HGNC Symbol;Acc:1784]	2.36275	8.07905	1007.54	4.13024e-221	2.03882e-217
ENSG00000171951	SCG2	secretogranin II [Source:HGNC Symbol;Acc:10575]	3.11703	5.39428	1002.15	6.1126e-220	2.26304e-216
ENSG00000171848	RRM2	ribonucleotide reductase M2 [Source:HGNC Symbol;Acc:10452]	-2.12323	8.26549	896.476	5.72651e-197	1.69608e-193
ENSG00000184347	SLIT3	slit homolog 3 (Drosophila) [Source:HGNC Symbol;Acc:11087]	-2.4237	6.62019	884.012	2.93332e-194	7.23992e-191
ENSG00000120889	TNFRSF10B	tumor necrosis factor receptor superfamily, member 10b [Source:HGNC Symbol;Acc:11905]	1.67956	8.42155	882.708	5.63522e-194	1.19217e-190
ENSG00000151012	SLC7A11	solute carrier family 7 (anionic amino acid transporter light chain, xc- system), member 11 [Source:HGNC Symbol;Acc:11059]	2.57542	5.94112	880.612	1.60939e-193	2.97918e-190
ENSG00000174371	EXO1	exonuclease 1 [Source:HGNC Symbol;Acc:3511]	-2.05	7.0472	857.417	1.77466e-188	2.9201e-185
ENSG00000228716	DHFR	dihydrofolate reductase [Source:HGNC Symbol;Acc:2861]	-1.77851	7.99559	851.52	3.39669e-187	5.03016e-184
ENSG00000139352	ASCL1	achaete-scute complex homolog 1 (Drosophila) [Source:HGNC Symbol;Acc:738]	-1.85247	7.21233	828.552	3.34543e-182	4.50386e-179
ENSG00000135679	MDM2	Mdm2, p53 E3 ubiquitin protein ligase homolog (mouse) [Source:HGNC Symbol;Acc:6973]	1.82862	8.25676	821.236	1.30337e-180	1.60846e-177
ENSG00000172667	ZMAT3	zinc finger, matrin-type 3 [Source:HGNC Symbol;Acc:29983]	1.96699	6.84202	814.239	4.32862e-179	4.93096e-176
ENSG00000185432	METTL7A	methyltransferase like 7A [Source:HGNC Symbol;Acc:24550]	2.57223	5.74457	808.672	7.02628e-178	7.4323e-175
ENSG00000197852	FAM212B	family with sequence similarity 212, member B [Source:HGNC Symbol;Acc:28045]	1.9597	7.12016	796.617	2.93484e-175	2.89747e-172
ENSG00000092470	WDR76	WD repeat domain 76 [Source:HGNC Symbol;Acc:25773]	-2.19524	6.41381	772.557	4.99794e-170	4.62591e-167
ENSG00000104738	MCM4	minichromosome maintenance complex component 4 [Source:HGNC Symbol;Acc:6947]	-1.66269	8.4859	768.04	4.79568e-169	4.1776e-166
ENSG00000012048	BRCA1	breast cancer 1, early onset [Source:HGNC Symbol;Acc:1100]	-1.71229	7.67064	741.539	2.77355e-163	2.28186e-160
ENSG00000143476	DTL	denticleless E3 ubiquitin protein ligase homolog (Drosophila) [Source:HGNC Symbol;Acc:30288]	-1.89913	7.35631	736.869	2.87505e-162	2.24087e-159
ENSG00000156802	ATAD2	ATPase family, AAA domain containing 2 [Source:HGNC Symbol;Acc:30123]	-1.77338	7.69155	720.644	9.69661e-159	7.17985e-156
ENSG00000105821	DNAJC2	DnaJ (Hsp40) homolog, subfamily C, member 2 [Source:HGNC Symbol;Acc:13192]	1.6787	7.74354	705.942	1.52639e-155	1.07639e-152
ENSG00000076003	MCM6	minichromosome maintenance complex component 6 [Source:HGNC Symbol;Acc:6949]	-1.96004	7.39135	681.7	2.85222e-150	1.91993e-147
ENSG00000092853	CLSPN	claspin [Source:HGNC Symbol;Acc:19715]	-2.06384	6.32937	678.042	1.78139e-149	1.14699e-146
ENSG00000163132	MSX1	msh homeobox 1 [Source:HGNC Symbol;Acc:7391]	3.24309	5.61739	659.892	1.57686e-145	9.72991e-143
ENSG00000094804	CDC6	cell division cycle 6 homolog (S. cerevisiae) [Source:HGNC Symbol;Acc:1744]	-1.80682	7.03199	658.118	3.83353e-145	2.27083e-142
ENSG00000115461	IGFBP5	insulin-like growth factor binding protein 5 [Source:HGNC Symbol;Acc:5474]	-1.71484	7.23625	647.487	7.86288e-143	4.47851e-140
ENSG00000160789	LMNA	lamin A/C [Source:HGNC Symbol;Acc:6636]	2.38594	6.0369	626.92	2.33747e-138	1.28206e-135
ENSG00000166803	KIAA0101	KIAA0101 [Source:HGNC Symbol;Acc:28961]	-1.60488	7.64517	603.94	2.32682e-133	1.23064e-130
ENSG00000198830	HMGN2	high mobility group nucleosomal binding domain 2 [Source:HGNC Symbol;Acc:4986]	-1.39379	9.44674	576.469	2.19829e-127	1.12257e-124
ENSG00000162374	ELAVL4	ELAV (embryonic lethal, abnormal vision, Drosophila)-like 4 [Source:HGNC Symbol;Acc:3315]	-1.45641	7.8686	574.94	4.72913e-127	2.33446e-124
ENSG00000065328	MCM10	minichromosome maintenance complex component 10 [Source:HGNC Symbol;Acc:18043]	-1.64841	6.83541	574.08	7.27347e-127	3.47461e-124
ENSG00000159259	CHAF1B	chromatin assembly factor 1, subunit B (p60) [Source:HGNC Symbol;Acc:1911]	-2.46304	5.38956	568.161	1.41072e-125	6.52856e-123
ENSG00000109472	CPE	carboxypeptidase E [Source:HGNC Symbol;Acc:2303]	1.60533	6.98664	567.975	1.54793e-125	6.94645e-123
ENSG00000159388	BTG2	BTG family, member 2 [Source:HGNC Symbol;Acc:1131]	1.9455	5.8026	562.528	2.36919e-124	1.03192e-121
ENSG00000113368	LMNB1	lamin B1 [Source:HGNC Symbol;Acc:6637]	-1.4329	8.30819	559.157	1.28229e-123	5.42553e-121
ENSG00000180616	SSTR2	somatostatin receptor 2 [Source:HGNC Symbol;Acc:11331]	-1.45015	8.34753	556.839	4.09577e-123	1.68484e-120
ENSG00000093009	CDC45	cell division cycle 45 homolog (S. cerevisiae) [Source:HGNC Symbol;Acc:1739]	-2.31599	5.402	555.178	9.40838e-123	3.76564e-120
ENSG00000129173	E2F8	E2F transcription factor 8 [Source:HGNC Symbol;Acc:24727]	-3.42384	4.22705	553.731	1.94228e-122	7.56929e-120
ENSG00000076248	UNG	uracil-DNA glycosylase [Source:HGNC Symbol;Acc:12572]	-1.68259	6.76777	541.904	7.26339e-120	2.75804e-117
ENSG00000076604	TRAF4	TNF receptor-associated factor 4 [Source:HGNC Symbol;Acc:12034]	1.86641	6.40281	535.543	1.75808e-118	6.50886e-116
ENSG00000198400	NTRK1	neurotrophic tyrosine kinase, receptor, type 1 [Source:HGNC Symbol;Acc:8031]	-2.91386	5.42948	532.297	8.93959e-118	3.22894e-115
ENSG00000167325	RRM1	ribonucleotide reductase M1 [Source:HGNC Symbol;Acc:10451]	-1.33725	8.25999	530.788	1.903e-117	6.70988e-115
ENSG00000130558	OLFM1	olfactomedin 1 [Source:HGNC Symbol;Acc:17187]	-1.35081	8.1303	527.742	8.75303e-117	3.0145e-114
ENSG00000054654	SYNE2	spectrin repeat containing, nuclear envelope 2 [Source:HGNC Symbol;Acc:17084]	-1.38403	7.6499	523.338	7.95102e-116	2.67606e-113
ENSG00000250337	RP11-46C20.1		3.16789	4.10946	521.34	2.16311e-115	7.11855e-113
ENSG00000113196	HAND1	heart and neural crest derivatives expressed 1 [Source:HGNC Symbol;Acc:4807]	-2.07202	5.99698	519.514	5.3998e-115	1.73838e-112
ENSG00000137804	NUSAP1	nucleolar and spindle associated protein 1 [Source:HGNC Symbol;Acc:18538]	-1.47953	7.4887	518.542	8.78604e-115	2.76835e-112
ENSG00000101680	LAMA1	laminin, alpha 1 [Source:HGNC Symbol;Acc:6481]	-2.06135	5.82675	517.889	1.21839e-114	3.75899e-112
ENSG00000181026	AEN	apoptosis enhancing nuclease [Source:HGNC Symbol;Acc:25722]	1.50929	7.69313	505.266	6.79428e-112	2.0534e-109
ENSG00000107562	CXCL12	chemokine (C-X-C motif) ligand 12 [Source:HGNC Symbol;Acc:10672]	-2.98579	4.19342	495.799	7.79757e-110	2.30948e-107
ENSG00000112029	FBXO5	F-box protein 5 [Source:HGNC Symbol;Acc:13584]	-1.59255	6.92843	492.47	4.13391e-109	1.20037e-106
ENSG00000008256	CYTH3	cytohesin 3 [Source:HGNC Symbol;Acc:9504]	1.80992	6.37389	489.526	1.80718e-108	5.14664e-106
ENSG00000198576	ARC	activity-regulated cytoskeleton-associated protein [Source:HGNC Symbol;Acc:648]	4.50853	3.08483	489.467	1.86102e-108	5.19997e-106
ENSG00000151725	MLF1IP	MLF1 interacting protein [Source:HGNC Symbol;Acc:21348]	-1.58201	6.9023	488.02	3.84235e-108	1.05373e-105
ENSG00000116106	EPHA4	EPH receptor A4 [Source:HGNC Symbol;Acc:3388]	3.72061	3.47427	484.167	2.64852e-107	7.13127e-105
ENSG00000162783	IER5	immediate early response 5 [Source:HGNC Symbol;Acc:5393]	1.84835	5.79265	483.537	3.63146e-107	9.60327e-105
ENSG00000168546	GFRA2	GDNF family receptor alpha 2 [Source:HGNC Symbol;Acc:4244]	-1.57045	7.17723	482.623	5.74204e-107	1.49182e-104
ENSG00000185112	FAM43A	family with sequence similarity 43, member A [Source:HGNC Symbol;Acc:26888]	-2.42806	5.19719	481.944	8.06715e-107	2.05976e-104
ENSG00000184445	KNTC1	kinetochore associated 1 [Source:HGNC Symbol;Acc:17255]	-1.46869	7.30924	481.344	1.08975e-106	2.73526e-104
ENSG00000106829	TLE4	transducin-like enhancer of split 4 (E(sp1) homolog, Drosophila) [Source:HGNC Symbol;Acc:11840]	1.739	5.99853	472.992	7.15479e-105	1.76592e-102
ENSG00000148773	MKI67	antigen identified by monoclonal antibody Ki-67 [Source:HGNC Symbol;Acc:7107]	-1.35989	8.83838	472.624	8.60601e-105	2.08929e-102
ENSG00000162772	ATF3	activating transcription factor 3 [Source:HGNC Symbol;Acc:785]	2.70078	4.31395	471.836	1.27692e-104	3.04998e-102
ENSG00000150760	DOCK1	dedicator of cytokinesis 1 [Source:HGNC Symbol;Acc:2987]	-1.56218	6.40208	469.166	4.86595e-104	1.14381e-101
ENSG00000242265	PEG10	paternally expressed 10 [Source:HGNC Symbol;Acc:14005]	-1.39659	7.33486	468.506	6.77412e-104	1.56747e-101
ENSG00000136048	DRAM1	DNA-damage regulated autophagy modulator 1 [Source:HGNC Symbol;Acc:25645]	2.79325	4.18126	466.483	1.8669e-103	4.25336e-101
ENSG00000261685	RP11-401P9.4		3.20272	5.00884	465.05	3.82722e-103	8.58748e-101
ENSG00000128951	DUT	deoxyuridine triphosphatase [Source:HGNC Symbol;Acc:3078]	-1.54761	7.16685	463.927	6.71946e-103	1.4852e-100
ENSG00000175305	CCNE2	cyclin E2 [Source:HGNC Symbol;Acc:1590]	-2.98212	4.62846	463.01	1.06378e-102	2.31669e-100
ENSG00000141232	TOB1	transducer of ERBB2, 1 [Source:HGNC Symbol;Acc:11979]	1.59534	6.14526	451.776	2.96255e-100	6.35831e-98
ENSG00000136492	BRIP1	BRCA1 interacting protein C-terminal helicase 1 [Source:HGNC Symbol;Acc:20473]	-1.5682	6.98457	445.594	6.5609e-99	1.38801e-96
ENSG00000164045	CDC25A	cell division cycle 25 homolog A (S. pombe) [Source:HGNC Symbol;Acc:1725]	-1.49237	6.60025	441.334	5.54879e-98	1.15735e-95
ENSG00000132718	SYT11	synaptotagmin XI [Source:HGNC Symbol;Acc:19239]	1.20446	8.23132	440.136	1.01128e-97	2.08001e-95
ENSG00000170385	SLC30A1	solute carrier family 30 (zinc transporter), member 1 [Source:HGNC Symbol;Acc:11012]	1.59034	6.63598	438.163	2.71738e-97	5.51255e-95
ENSG00000027644	INSRR	insulin receptor-related receptor [Source:HGNC Symbol;Acc:6093]	-4.0406	3.2083	435.297	1.14318e-96	2.28774e-94
ENSG00000109805	NCAPG	non-SMC condensin I complex, subunit G [Source:HGNC Symbol;Acc:24304]	-1.38899	7.28144	434.804	1.46315e-96	2.88905e-94
ENSG00000113389	NPR3	natriuretic peptide receptor C/guanylate cyclase C (atrionatriuretic peptide receptor C) [Source:HGNC Symbol;Acc:7945]	4.91357	3.07991	430.556	1.22995e-95	2.39663e-93
ENSG00000158164	TMSB15A	thymosin beta 15a [Source:HGNC Symbol;Acc:30744]	-1.55856	6.63384	427.763	4.98527e-95	9.58791e-93
ENSG00000079459	FDFT1	farnesyl-diphosphate farnesyltransferase 1 [Source:HGNC Symbol;Acc:3629]	-1.30152	7.34974	427.7	5.14547e-95	9.76913e-93
ENSG00000101057	MYBL2	v-myb myeloblastosis viral oncogene homolog (avian)-like 2 [Source:HGNC Symbol;Acc:7548]	-1.60342	6.78763	425.923	1.25369e-94	2.3501e-92
ENSG00000067048	DDX3Y	DEAD (Asp-Glu-Ala-Asp) box polypeptide 3, Y-linked [Source:HGNC Symbol;Acc:2699]	1.19551	7.94514	421.676	1.05374e-93	1.9506e-91
ENSG00000171368	TPPP	tubulin polymerization promoting protein [Source:HGNC Symbol;Acc:24164]	3.59488	3.25439	421.459	1.17473e-93	2.14772e-91
ENSG00000144452	ABCA12	ATP-binding cassette, sub-family A (ABC1), member 12 [Source:HGNC Symbol;Acc:14637]	4.22838	2.53656	420.068	2.35832e-93	4.25906e-91
ENSG00000165186	PTCHD1	patched domain containing 1 [Source:HGNC Symbol;Acc:26392]	1.59509	6.1768	418.99	4.04774e-93	7.22204e-91
ENSG00000006652	IFRD1	interferon-related developmental regulator 1 [Source:HGNC Symbol;Acc:5456]	1.37008	6.85279	418.089	6.35834e-93	1.12096e-90
ENSG00000170153	RNF150	ring finger protein 150 [Source:HGNC Symbol;Acc:23138]	1.53489	6.39099	416.45	1.44623e-92	2.51967e-90
ENSG00000095002	MSH2	mutS homolog 2, colon cancer, nonpolyposis type 1 (E. coli) [Source:HGNC Symbol;Acc:7325]	-1.25867	7.75159	413.812	5.42534e-92	9.34231e-90
ENSG00000048392	RRM2B	ribonucleotide reductase M2 B (TP53 inducible) [Source:HGNC Symbol;Acc:17296]	1.75525	6.16594	405.576	3.36695e-90	5.73118e-88
ENSG00000196781	TLE1	transducin-like enhancer of split 1 (E(sp1) homolog, Drosophila) [Source:HGNC Symbol;Acc:11837]	1.94066	5.68507	404.076	7.14007e-90	1.20156e-87
ENSG00000188452	CERKL	ceramide kinase-like [Source:HGNC Symbol;Acc:21699]	-1.44569	6.61441	403.297	1.05512e-89	1.75564e-87
ENSG00000140280	LYSMD2	LysM, putative peptidoglycan-binding, domain containing 2 [Source:HGNC Symbol;Acc:28571]	2.62734	4.36004	402.492	1.57965e-89	2.59922e-87
ENSG00000055163	CYFIP2	cytoplasmic FMR1 interacting protein 2 [Source:HGNC Symbol;Acc:13760]	1.4107	6.50257	400.254	4.84806e-89	7.88955e-87
ENSG00000170017	ALCAM	activated leukocyte cell adhesion molecule [Source:HGNC Symbol;Acc:400]	1.63137	5.91641	399.349	7.63334e-89	1.22872e-86
ENSG00000159199	ATP5G1	ATP synthase, H+ transporting, mitochondrial Fo complex, subunit C1 (subunit 9) [Source:HGNC Symbol;Acc:841]	-1.41368	6.86044	398.848	9.81092e-89	1.56226e-86
ENSG00000117724	CENPF	centromere protein F, 350/400kDa (mitosin) [Source:HGNC Symbol;Acc:1857]	-1.0152	10.0515	395.996	4.09885e-88	6.45743e-86
ENSG00000184979	USP18	ubiquitin specific peptidase 18 [Source:HGNC Symbol;Acc:12616]	-4.62197	2.9822	387.292	3.21684e-86	5.01455e-84
ENSG00000148400	NOTCH1	notch 1 [Source:HGNC Symbol;Acc:7881]	2.04224	5.80797	386.079	5.90933e-86	9.11575e-84
ENSG00000101825	MXRA5	matrix-remodelling associated 5 [Source:HGNC Symbol;Acc:7539]	-2.61353	4.38948	384.196	1.51859e-85	2.31843e-83
ENSG00000130600	H19	H19, imprinted maternally expressed transcript (non-protein coding) [Source:HGNC Symbol;Acc:4713]	-3.36473	3.26302	383.008	2.75475e-85	4.16276e-83
ENSG00000064309	CDON	Cdon homolog (mouse) [Source:HGNC Symbol;Acc:17104]	-1.35677	7.22295	381.178	6.89355e-85	1.03118e-82
ENSG00000167306	MYO5B	myosin VB [Source:HGNC Symbol;Acc:7603]	2.56169	3.96985	377.207	5.048e-84	7.47559e-82
ENSG00000116062	MSH6	mutS homolog 6 (E. coli) [Source:HGNC Symbol;Acc:7329]	-1.28009	7.72393	377.07	5.40727e-84	7.92835e-82
ENSG00000163638	ADAMTS9	ADAM metallopeptidase with thrombospondin type 1 motif, 9 [Source:HGNC Symbol;Acc:13202]	-1.52528	6.07255	375.353	1.27879e-83	1.85662e-81
ENSG00000050438	SLC4A8	solute carrier family 4, sodium bicarbonate cotransporter, member 8 [Source:HGNC Symbol;Acc:11034]	-1.86868	5.84658	373.323	3.53689e-83	5.08522e-81
ENSG00000130766	SESN2	sestrin 2 [Source:HGNC Symbol;Acc:20746]	2.15385	5.07567	371.546	8.62355e-83	1.22794e-80
ENSG00000110092	CCND1	cyclin D1 [Source:HGNC Symbol;Acc:1582]	-1.06131	8.7377	370.938	1.16932e-82	1.64918e-80
ENSG00000251095	RP11-115D19.1		3.95065	2.7756	370.238	1.66094e-82	2.32046e-80
ENSG00000108256	NUFIP2	nuclear fragile X mental retardation protein interacting protein 2 [Source:HGNC Symbol;Acc:17634]	1.13408	8.93869	369.741	2.13083e-82	2.94911e-80
ENSG00000162490	DRAXIN	dorsal inhibitory axon guidance protein [Source:HGNC Symbol;Acc:25054]	-1.53939	5.88	368.075	4.91273e-82	6.73635e-80
ENSG00000205542	TMSB4X	thymosin beta 4, X-linked [Source:HGNC Symbol;Acc:11881]	-1.01726	8.94919	367.84	5.52732e-82	7.50955e-80
ENSG00000164543	STK17A	serine/threonine kinase 17a [Source:HGNC Symbol;Acc:11395]	1.4467	6.24372	367.081	8.08525e-82	1.08849e-79
ENSG00000156398	SFXN2	sideroflexin 2 [Source:HGNC Symbol;Acc:16086]	-2.51394	4.37863	366.975	8.52893e-82	1.13788e-79
ENSG00000145386	CCNA2	cyclin A2 [Source:HGNC Symbol;Acc:1578]	-1.3253	7.13246	365.662	1.64695e-81	2.17765e-79
ENSG00000213949	ITGA1	integrin, alpha 1 [Source:HGNC Symbol;Acc:6134]	-1.50024	5.90974	364.86	2.46201e-81	3.22655e-79
ENSG00000070669	ASNS	asparagine synthetase (glutamine-hydrolyzing) [Source:HGNC Symbol;Acc:753]	1.21112	7.14299	362.295	8.91049e-81	1.1575e-78
ENSG00000140807	NKD1	naked cuticle homolog 1 (Drosophila) [Source:HGNC Symbol;Acc:17045]	2.63925	5.46033	361.859	1.10852e-80	1.42749e-78
ENSG00000164104	HMGB2	high mobility group box 2 [Source:HGNC Symbol;Acc:5000]	-1.0373	9.10529	360.957	1.74232e-80	2.22431e-78
ENSG00000123374	CDK2	cyclin-dependent kinase 2 [Source:HGNC Symbol;Acc:1771]	-1.4205	6.31056	359.329	3.94272e-80	4.99041e-78
ENSG00000186529	CYP4F3	cytochrome P450, family 4, subfamily F, polypeptide 3 [Source:HGNC Symbol;Acc:2646]	5.12141	1.90119	357.351	1.06273e-79	1.33373e-77
ENSG00000186642	PDE2A	phosphodiesterase 2A, cGMP-stimulated [Source:HGNC Symbol;Acc:8777]	-1.76996	5.82489	355.044	3.37904e-79	4.20506e-77
ENSG00000182054	IDH2	isocitrate dehydrogenase 2 (NADP+), mitochondrial [Source:HGNC Symbol;Acc:5383]	-1.31324	7.19733	348.257	1.0158e-77	1.25359e-75
ENSG00000139946	PELI2	pellino E3 ubiquitin protein ligase family member 2 [Source:HGNC Symbol;Acc:8828]	-1.40424	6.25904	345.571	3.90473e-77	4.77894e-75
ENSG00000072778	ACADVL	acyl-CoA dehydrogenase, very long chain [Source:HGNC Symbol;Acc:92]	-1.75004	5.83966	345.337	4.39038e-77	5.32927e-75
ENSG00000110619	CARS	cysteinyl-tRNA synthetase [Source:HGNC Symbol;Acc:1493]	1.45922	6.63836	344.855	5.59128e-77	6.73181e-75
ENSG00000187231	SESTD1	SEC14 and spectrin domains 1 [Source:HGNC Symbol;Acc:18379]	-1.87507	5.17184	344.647	6.20766e-77	7.41365e-75
ENSG00000174307	PHLDA3	pleckstrin homology-like domain, family A, member 3 [Source:HGNC Symbol;Acc:8934]	2.31016	4.83389	343.211	1.2754e-76	1.51099e-74
ENSG00000163873	GRIK3	glutamate receptor, ionotropic, kainate 3 [Source:HGNC Symbol;Acc:4581]	-2.24191	4.81646	342.72	1.631e-76	1.91695e-74
ENSG00000176890	TYMS	thymidylate synthetase [Source:HGNC Symbol;Acc:12441]	-1.08931	8.15685	341.881	2.48425e-76	2.8968e-74
ENSG00000140262	TCF12	transcription factor 12 [Source:HGNC Symbol;Acc:11623]	0.987436	9.59142	338.185	1.58582e-75	1.83472e-73
ENSG00000104722	NEFM	neurofilament, medium polypeptide [Source:HGNC Symbol;Acc:7734]	1.37748	6.4929	335.744	5.39202e-75	6.18995e-73
ENSG00000128272	ATF4	activating transcription factor 4 (tax-responsive enhancer element B67) [Source:HGNC Symbol;Acc:786]	1.22714	8.52363	335.116	7.38671e-75	8.4146e-73
ENSG00000205592	MUC19	mucin 19, oligomeric [Source:HGNC Symbol;Acc:14362]	3.28341	3.09112	334.315	1.10421e-74	1.24827e-72
ENSG00000116127	ALMS1	Alstrom syndrome 1 [Source:HGNC Symbol;Acc:428]	-1.17989	6.97785	332.964	2.17412e-74	2.43914e-72
ENSG00000144354	CDCA7	cell division cycle associated 7 [Source:HGNC Symbol;Acc:14628]	-1.38108	6.79847	331.728	4.04078e-74	4.49606e-72
ENSG00000131747	TOP2A	topoisomerase (DNA) II alpha 170kDa [Source:HGNC Symbol;Acc:11989]	-1.03953	9.89864	331.714	4.06829e-74	4.49606e-72
ENSG00000070087	PFN2	profilin 2 [Source:HGNC Symbol;Acc:8882]	-1.07305	8.2258	328.393	2.15138e-73	2.35998e-71
ENSG00000104112	SCG3	secretogranin III [Source:HGNC Symbol;Acc:13707]	1.18785	7.75289	328.295	2.25971e-73	2.4606e-71
ENSG00000164076	CAMKV	CaM kinase-like vesicle-associated [Source:HGNC Symbol;Acc:28788]	1.28742	6.63711	327.639	3.13994e-73	3.39411e-71
ENSG00000149485	FADS1	fatty acid desaturase 1 [Source:HGNC Symbol;Acc:3574]	-1.03045	8.35962	327.3	3.72323e-73	3.99545e-71
ENSG00000164904	ALDH7A1	aldehyde dehydrogenase 7 family, member A1 [Source:HGNC Symbol;Acc:877]	-1.22968	6.81763	323.975	1.97279e-72	2.1018e-70
ENSG00000131480	AOC2	amine oxidase, copper containing 2 (retina-specific) [Source:HGNC Symbol;Acc:549]	3.65216	3.15571	323.325	2.73308e-72	2.89102e-70
ENSG00000112715	VEGFA	vascular endothelial growth factor A [Source:HGNC Symbol;Acc:12680]	2.04693	5.15535	320.919	9.13339e-72	9.59265e-70
ENSG00000049323	LTBP1	latent transforming growth factor beta binding protein 1 [Source:HGNC Symbol;Acc:6714]	1.79975	5.75481	318.191	3.58921e-71	3.74314e-69
ENSG00000144824	PHLDB2	pleckstrin homology-like domain, family B, member 2 [Source:HGNC Symbol;Acc:29573]	-1.20509	7.2908	317.188	5.93395e-71	6.14516e-69
ENSG00000120437	ACAT2	acetyl-CoA acetyltransferase 2 [Source:HGNC Symbol;Acc:94]	-1.17688	6.95519	316.808	7.18044e-71	7.38439e-69
ENSG00000085840	ORC1	origin recognition complex, subunit 1 [Source:HGNC Symbol;Acc:8487]	-1.36506	6.51058	315.28	1.54512e-70	1.57804e-68
ENSG00000108960	MMD	monocyte to macrophage differentiation-associated [Source:HGNC Symbol;Acc:7153]	-1.2158	7.64582	314.012	2.91889e-70	2.96067e-68
ENSG00000083857	FAT1	FAT tumor suppressor homolog 1 (Drosophila) [Source:HGNC Symbol;Acc:3595]	1.0796	7.56673	311.423	1.06945e-69	1.07738e-67
ENSG00000198554	WDHD1	WD repeat and HMG-box DNA binding protein 1 [Source:HGNC Symbol;Acc:23170]	-1.19898	6.92852	310.61	1.60827e-69	1.60925e-67
ENSG00000169752	NRG4	neuregulin 4 [Source:HGNC Symbol;Acc:29862]	1.82866	4.81015	308.177	5.45085e-69	5.41756e-67
ENSG00000160752	FDPS	farnesyl diphosphate synthase [Source:HGNC Symbol;Acc:3631]	-1.24342	7.10795	308.014	5.91425e-69	5.83894e-67
ENSG00000126016	AMOT	angiomotin [Source:HGNC Symbol;Acc:17810]	-2.02942	4.53242	307.782	6.64381e-69	6.51578e-67
ENSG00000112972	HMGCS1	3-hydroxy-3-methylglutaryl-CoA synthase 1 (soluble) [Source:HGNC Symbol;Acc:5007]	-1.10555	7.6109	307.7	6.92268e-69	6.7446e-67
ENSG00000120802	TMPO	thymopoietin [Source:HGNC Symbol;Acc:11875]	-1.04383	9.24872	307.523	7.56355e-69	7.32083e-67
ENSG00000170899	GSTA4	glutathione S-transferase alpha 4 [Source:HGNC Symbol;Acc:4629]	-1.43272	5.89359	305.423	2.16952e-68	2.08626e-66
ENSG00000165244	ZNF367	zinc finger protein 367 [Source:HGNC Symbol;Acc:18320]	-2.23909	4.47215	305.102	2.54806e-68	2.43447e-66
ENSG00000110900	TSPAN11	tetraspanin 11 [Source:HGNC Symbol;Acc:30795]	1.62308	5.67959	305.07	2.58916e-68	2.45788e-66
ENSG00000185088	RPS27L	ribosomal protein S27-like [Source:HGNC Symbol;Acc:18476]	1.07528	7.531	303.922	4.60635e-68	4.34494e-66
ENSG00000142627	EPHA2	EPH receptor A2 [Source:HGNC Symbol;Acc:3386]	2.45384	3.64451	301.165	1.83634e-67	1.72116e-65
ENSG00000130707	ASS1	argininosuccinate synthase 1 [Source:HGNC Symbol;Acc:758]	-1.24695	8.42073	300.009	3.27906e-67	3.05406e-65
ENSG00000111247	RAD51AP1	RAD51 associated protein 1 [Source:HGNC Symbol;Acc:16956]	-1.50624	5.98173	299.968	3.34796e-67	3.09875e-65
ENSG00000260560	A)		2.74869	4.82923	299.371	4.51569e-67	4.15359e-65
ENSG00000116717	GADD45A	growth arrest and DNA-damage-inducible, alpha [Source:HGNC Symbol;Acc:4095]	1.22636	6.40507	298.937	5.61384e-67	5.13181e-65
ENSG00000171320	ESCO2	establishment of cohesion 1 homolog 2 (S. cerevisiae) [Source:HGNC Symbol;Acc:27230]	-1.75462	5.4463	297.285	1.28642e-66	1.16875e-64
ENSG00000231213	PLSCR5	phospholipid scramblase family, member 5 [Source:HGNC Symbol;Acc:19952]	-1.3777	6.1448	294.023	6.60539e-66	5.96458e-64
ENSG00000131080	EDA2R	ectodysplasin A2 receptor [Source:HGNC Symbol;Acc:17756]	1.77075	5.10241	289.756	5.6185e-65	5.04269e-63
ENSG00000166482	MFAP4	microfibrillar-associated protein 4 [Source:HGNC Symbol;Acc:7035]	-1.25874	7.37603	288.511	1.04977e-64	9.36509e-63
ENSG00000052841	TTC17	tetratricopeptide repeat domain 17 [Source:HGNC Symbol;Acc:25596]	1.14385	6.84361	287.933	1.40285e-64	1.244e-62
ENSG00000168078	PBK	PDZ binding kinase [Source:HGNC Symbol;Acc:18282]	-1.44483	6.65682	286.938	2.31084e-64	2.0342e-62
ENSG00000197256	KANK2	KN motif and ankyrin repeat domains 2 [Source:HGNC Symbol;Acc:29300]	-2.14998	4.22902	286.929	2.32143e-64	2.0342e-62
ENSG00000113810	SMC4	structural maintenance of chromosomes 4 [Source:HGNC Symbol;Acc:14013]	-1.02517	8.81392	286.455	2.94477e-64	2.56524e-62
ENSG00000198826	ARHGAP11A	Rho GTPase activating protein 11A [Source:HGNC Symbol;Acc:15783]	-1.16947	7.32973	286.327	3.13913e-64	2.71856e-62
ENSG00000146425	DYNLT1	dynein, light chain, Tctex-type 1 [Source:HGNC Symbol;Acc:11697]	-1.07582	7.9554	285.907	3.87698e-64	3.33804e-62
ENSG00000122952	ZWINT	ZW10 interactor [Source:HGNC Symbol;Acc:13195]	-1.1003	7.27532	285.351	5.12223e-64	4.38469e-62
ENSG00000140525	FANCI	Fanconi anemia, complementation group I [Source:HGNC Symbol;Acc:25568]	-0.96639	8.51432	285.221	5.46787e-64	4.65366e-62
ENSG00000170734	POLH	polymerase (DNA directed), eta [Source:HGNC Symbol;Acc:9181]	1.62535	5.52754	284.298	8.68814e-64	7.35216e-62
ENSG00000144229	THSD7B	thrombospondin, type I, domain containing 7B [Source:HGNC Symbol;Acc:29348]	-1.51145	5.68319	283.78	1.12705e-63	9.48324e-62
ENSG00000067064	IDI1	isopentenyl-diphosphate delta isomerase 1 [Source:HGNC Symbol;Acc:5387]	-1.19091	7.37607	282.783	1.85877e-63	1.55517e-61
ENSG00000120539	MASTL	microtubule associated serine/threonine kinase-like [Source:HGNC Symbol;Acc:19042]	-1.35579	6.01247	281.951	2.82194e-63	2.34776e-61
ENSG00000127863	TNFRSF19	tumor necrosis factor receptor superfamily, member 19 [Source:HGNC Symbol;Acc:11915]	1.84929	6.10849	278.802	1.36994e-62	1.13338e-60
ENSG00000234741	GAS5	growth arrest-specific 5 (non-protein coding) [Source:HGNC Symbol;Acc:16355]	0.906053	8.95966	278.603	1.5134e-62	1.24511e-60
ENSG00000125247	TMTC4	transmembrane and tetratricopeptide repeat containing 4 [Source:HGNC Symbol;Acc:25904]	-1.49293	5.57031	277.839	2.22115e-62	1.8173e-60
ENSG00000091483	FH	fumarate hydratase [Source:HGNC Symbol;Acc:3700]	-1.10692	7.48582	277.545	2.57389e-62	2.09433e-60
ENSG00000049130	KITLG	KIT ligand [Source:HGNC Symbol;Acc:6343]	1.64832	5.36407	277.031	3.33104e-62	2.69559e-60
ENSG00000186834	HEXIM1	hexamethylene bis-acetamide inducible 1 [Source:HGNC Symbol;Acc:24953]	1.21806	6.31753	276.545	4.25043e-62	3.4209e-60
ENSG00000034063	UHRF1	ubiquitin-like with PHD and ring finger domains 1 [Source:HGNC Symbol;Acc:12556]	-1.2408	6.94673	274.476	1.20075e-61	9.61184e-60
ENSG00000138796	HADH	hydroxyacyl-CoA dehydrogenase [Source:HGNC Symbol;Acc:4799]	-1.34646	6.0271	272.117	3.92162e-61	3.12233e-59
ENSG00000158615	PPP1R15B	protein phosphatase 1, regulatory subunit 15B [Source:HGNC Symbol;Acc:14951]	0.950949	8.12435	270.407	9.25322e-61	7.32786e-59
ENSG00000168496	FEN1	flap structure-specific endonuclease 1 [Source:HGNC Symbol;Acc:3650]	-1.11697	6.71188	269.823	1.2403e-60	9.77003e-59
ENSG00000180667	YOD1	YOD1 OTU deubiquinating enzyme 1 homolog (S. cerevisiae) [Source:HGNC Symbol;Acc:25035]	1.27039	6.69261	269.327	1.59039e-60	1.24614e-58
ENSG00000087086	FTL	ferritin, light polypeptide [Source:HGNC Symbol;Acc:3999]	1.18603	8.677	268.721	2.15583e-60	1.6803e-58
ENSG00000180771	SRSF8	serine/arginine-rich splicing factor 8 [Source:HGNC Symbol;Acc:16988]	1.2475	6.31161	268.649	2.23516e-60	1.73301e-58
ENSG00000168916	ZNF608	zinc finger protein 608 [Source:HGNC Symbol;Acc:29238]	1.53651	5.50401	268.426	2.5001e-60	1.92833e-58
ENSG00000134333	LDHA	lactate dehydrogenase A [Source:HGNC Symbol;Acc:6535]	-0.873565	10.2668	267.973	3.13843e-60	2.40813e-58
ENSG00000097046	CDC7	cell division cycle 7 homolog (S. cerevisiae) [Source:HGNC Symbol;Acc:1745]	-1.04066	7.69843	267.432	4.11628e-60	3.14216e-58
ENSG00000126787	DLGAP5	discs, large (Drosophila) homolog-associated protein 5 [Source:HGNC Symbol;Acc:16864]	-1.14329	7.07124	266.492	6.59931e-60	5.01175e-58
ENSG00000107796	ACTA2	actin, alpha 2, smooth muscle, aorta [Source:HGNC Symbol;Acc:130]	2.99728	2.56579	265.772	9.47257e-60	7.15711e-58
ENSG00000181938	GINS3	GINS complex subunit 3 (Psf3 homolog) [Source:HGNC Symbol;Acc:25851]	-1.38014	5.88437	265.601	1.0321e-59	7.75855e-58
ENSG00000157193	LRP8	low density lipoprotein receptor-related protein 8, apolipoprotein e receptor [Source:HGNC Symbol;Acc:6700]	-1.33144	5.99153	264.345	1.9384e-59	1.44978e-57
ENSG00000147256	ARHGAP36	Rho GTPase activating protein 36 [Source:HGNC Symbol;Acc:26388]	-1.94102	4.24482	264.191	2.09416e-59	1.55841e-57
ENSG00000178913	TAF7	TAF7 RNA polymerase II, TATA box binding protein (TBP)-associated factor, 55kDa [Source:HGNC Symbol;Acc:11541]	0.91895	8.30183	263.792	2.55873e-59	1.89461e-57
ENSG00000112309	B3GAT2	beta-1,3-glucuronyltransferase 2 (glucuronosyltransferase S) [Source:HGNC Symbol;Acc:922]	1.33554	6.10551	262.822	4.16369e-59	3.06766e-57
ENSG00000178235	SLITRK1	SLIT and NTRK-like family, member 1 [Source:HGNC Symbol;Acc:20297]	2.81358	3.09013	262.792	4.22566e-59	3.09791e-57
ENSG00000080986	NDC80	NDC80 kinetochore complex component homolog (S. cerevisiae) [Source:HGNC Symbol;Acc:16909]	-1.22714	6.36216	260.208	1.54626e-58	1.128e-56
ENSG00000185909	KLHDC8B	kelch domain containing 8B [Source:HGNC Symbol;Acc:28557]	2.21515	3.80694	259.385	2.33609e-58	1.69584e-56
ENSG00000197299	BLM	Bloom syndrome, RecQ helicase-like [Source:HGNC Symbol;Acc:1058]	-1.12959	6.9553	258.251	4.12729e-58	2.98151e-56
ENSG00000128342	LIF	leukemia inhibitory factor [Source:HGNC Symbol;Acc:6596]	4.59957	1.61014	258.134	4.37752e-58	3.14693e-56
ENSG00000124766	SOX4	SRY (sex determining region Y)-box 4 [Source:HGNC Symbol;Acc:11200]	0.971904	7.83293	257.906	4.90951e-58	3.51232e-56
ENSG00000171444	MCC	mutated in colorectal cancers [Source:HGNC Symbol;Acc:6935]	-0.910891	8.12604	257.753	5.30063e-58	3.7739e-56
ENSG00000157404	KIT	v-kit Hardy-Zuckerman 4 feline sarcoma viral oncogene homolog [Source:HGNC Symbol;Acc:6342]	-1.74923	4.89614	257.536	5.91038e-58	4.18788e-56
ENSG00000039560	RAI14	retinoic acid induced 14 [Source:HGNC Symbol;Acc:14873]	-0.910367	8.30634	257.16	7.13901e-58	5.03436e-56
ENSG00000104549	SQLE	squalene epoxidase [Source:HGNC Symbol;Acc:11279]	-1.08066	7.67917	256.148	1.1863e-57	8.32605e-56
ENSG00000134779	TPGS2	tubulin polyglutamylase complex subunit 2 [Source:HGNC Symbol;Acc:24561]	-1.10859	6.83873	255.976	1.29336e-57	9.0346e-56
ENSG00000138160	KIF11	kinesin family member 11 [Source:HGNC Symbol;Acc:6388]	-1.0466	7.67612	255.77	1.43379e-57	9.93336e-56
ENSG00000186522	SEPT10	septin 10 [Source:HGNC Symbol;Acc:14349]	-1.48475	5.73037	255.768	1.43544e-57	9.93336e-56
ENSG00000159409	CELF3	CUGBP, Elav-like family member 3 [Source:HGNC Symbol;Acc:11967]	1.62607	5.76268	255.515	1.63029e-57	1.12293e-55
ENSG00000112763	BTN2A1	butyrophilin, subfamily 2, member A1 [Source:HGNC Symbol;Acc:1136]	1.32693	5.66902	254.866	2.25746e-57	1.54772e-55
ENSG00000248905	FMN1	formin 1 [Source:HGNC Symbol;Acc:3768]	1.63443	4.73813	251.262	1.3785e-56	9.40746e-55
ENSG00000213903	LTB4R	leukotriene B4 receptor [Source:HGNC Symbol;Acc:6713]	2.12082	3.87184	251.24	1.39331e-56	9.46489e-55
ENSG00000198075	SULT1C4	sulfotransferase family, cytosolic, 1C, member 4 [Source:HGNC Symbol;Acc:11457]	1.42723	5.58643	251.097	1.49725e-56	1.01245e-54
ENSG00000175040	CHST2	carbohydrate (N-acetylglucosamine-6-O) sulfotransferase 2 [Source:HGNC Symbol;Acc:1970]	-1.38975	6.24191	250.473	2.04802e-56	1.37859e-54
ENSG00000175567	UCP2	uncoupling protein 2 (mitochondrial, proton carrier) [Source:HGNC Symbol;Acc:12518]	-2.11672	4.43566	250.439	2.08345e-56	1.3961e-54
ENSG00000130635	COL5A1	collagen, type V, alpha 1 [Source:HGNC Symbol;Acc:2209]	-1.65386	5.54493	250.321	2.21022e-56	1.47437e-54
ENSG00000140022	STON2	stonin 2 [Source:HGNC Symbol;Acc:30652]	1.72364	4.54376	250.006	2.58944e-56	1.7196e-54
ENSG00000164070	HSPA4L	heat shock 70kDa protein 4-like [Source:HGNC Symbol;Acc:17041]	1.56126	5.65389	249.947	2.66723e-56	1.76335e-54
ENSG00000173812	EIF1	eukaryotic translation initiation factor 1 [Source:HGNC Symbol;Acc:3249]	0.858746	8.88552	249.607	3.16276e-56	2.08166e-54
ENSG00000136982	DSCC1	defective in sister chromatid cohesion 1 homolog (S. cerevisiae) [Source:HGNC Symbol;Acc:24453]	-1.63813	5.60779	249.539	3.2727e-56	2.14448e-54
ENSG00000109084	TMEM97	transmembrane protein 97 [Source:HGNC Symbol;Acc:28106]	-0.977201	7.47284	249.49	3.35495e-56	2.1887e-54
ENSG00000077152	UBE2T	ubiquitin-conjugating enzyme E2T (putative) [Source:HGNC Symbol;Acc:25009]	-1.08991	7.0344	249.08	4.12206e-56	2.67735e-54
ENSG00000150594	ADRA2A	adrenoceptor alpha 2A [Source:HGNC Symbol;Acc:281]	-2.26004	3.65664	249.013	4.26226e-56	2.75632e-54
ENSG00000135452	TSPAN31	tetraspanin 31 [Source:HGNC Symbol;Acc:10539]	1.56863	4.96627	247.479	9.20734e-56	5.92832e-54
ENSG00000106484	MEST	mesoderm specific transcript homolog (mouse) [Source:HGNC Symbol;Acc:7028]	1.10895	6.95205	247.183	1.06793e-55	6.84628e-54
ENSG00000196159	FAT4	FAT tumor suppressor homolog 4 (Drosophila) [Source:HGNC Symbol;Acc:23109]	1.76954	4.47318	246.135	1.80764e-55	1.15385e-53
ENSG00000187678	SPRY4	sprouty homolog 4 (Drosophila) [Source:HGNC Symbol;Acc:15533]	3.28331	2.15659	244.989	3.21266e-55	2.0419e-53
ENSG00000132510	KDM6B	lysine (K)-specific demethylase 6B [Source:HGNC Symbol;Acc:29012]	1.66743	5.92887	244.642	3.82403e-55	2.42009e-53
ENSG00000109670	FBXW7	F-box and WD repeat domain containing 7, E3 ubiquitin protein ligase [Source:HGNC Symbol;Acc:16712]	1.28512	5.95541	243.889	5.58258e-55	3.51798e-53
ENSG00000163462	TRIM46	tripartite motif containing 46 [Source:HGNC Symbol;Acc:19019]	1.99334	4.66893	243.405	7.11837e-55	4.46678e-53
ENSG00000120693	SMAD9	SMAD family member 9 [Source:HGNC Symbol;Acc:6774]	-1.00916	6.83476	241.386	1.96078e-54	1.2252e-52
ENSG00000131473	ACLY	ATP citrate lyase [Source:HGNC Symbol;Acc:115]	-0.84358	9.48837	240.815	2.6124e-54	1.6255e-52
ENSG00000087116	ADAMTS2	ADAM metallopeptidase with thrombospondin type 1 motif, 2 [Source:HGNC Symbol;Acc:218]	-2.85888	2.79069	240.462	3.11878e-54	1.93247e-52
ENSG00000119969	HELLS	helicase, lymphoid-specific [Source:HGNC Symbol;Acc:4861]	-1.15394	6.71548	239.676	4.62792e-54	2.85562e-52
ENSG00000153721	CNKSR3	CNKSR family member 3 [Source:HGNC Symbol;Acc:23034]	-1.8984	4.37268	239.045	6.35376e-54	3.90426e-52
ENSG00000012963	UBR7	ubiquitin protein ligase E3 component n-recognin 7 (putative) [Source:HGNC Symbol;Acc:20344]	-1.20328	6.34071	239	6.49749e-54	3.97609e-52
ENSG00000100749	VRK1	vaccinia related kinase 1 [Source:HGNC Symbol;Acc:12718]	-1.18681	6.58234	238.622	7.85632e-54	4.78783e-52
ENSG00000198056	PRIM1	primase, DNA, polypeptide 1 (49kDa) [Source:HGNC Symbol;Acc:9369]	-1.51513	5.42394	237.425	1.43296e-53	8.69701e-52
ENSG00000244405	ETV5	ets variant 5 [Source:HGNC Symbol;Acc:3494]	1.65883	4.57306	236.776	1.98451e-53	1.19954e-51
ENSG00000026103	FAS	Fas (TNF receptor superfamily, member 6) [Source:HGNC Symbol;Acc:11920]	2.51768	2.81197	235.728	3.35908e-53	2.02214e-51
ENSG00000186480	INSIG1	insulin induced gene 1 [Source:HGNC Symbol;Acc:6083]	-1.32118	6.02314	234.192	7.26551e-53	4.35607e-51
ENSG00000261613	RP11-20I23.8		1.11401	7.34216	233.376	1.09408e-52	6.53313e-51
ENSG00000178966	RMI1	RMI1, RecQ mediated genome instability 1, homolog (S. cerevisiae) [Source:HGNC Symbol;Acc:25764]	-1.24342	6.17059	233.144	1.22941e-52	7.3118e-51
ENSG00000104177	MYEF2	myelin expression factor 2 [Source:HGNC Symbol;Acc:17940]	1.05123	7.09127	232.354	1.82845e-52	1.0831e-50
ENSG00000124795	DEK	DEK oncogene [Source:HGNC Symbol;Acc:2768]	-0.931008	9.01364	232.304	1.87466e-52	1.10605e-50
ENSG00000162733	DDR2	discoidin domain receptor tyrosine kinase 2 [Source:HGNC Symbol;Acc:2731]	1.09528	7.56241	231.52	2.77823e-52	1.63265e-50
ENSG00000167196	FBXO22	F-box protein 22 [Source:HGNC Symbol;Acc:13593]	1.00766	7.11832	231.006	3.59794e-52	2.106e-50
ENSG00000175274	TP53I11	tumor protein p53 inducible protein 11 [Source:HGNC Symbol;Acc:16842]	-1.2721	6.70574	230.991	3.625e-52	2.11349e-50
ENSG00000163950	SLBP	stem-loop binding protein [Source:HGNC Symbol;Acc:10904]	-1.09646	6.80927	230.616	4.37481e-52	2.54065e-50
ENSG00000167900	TK1	thymidine kinase 1, soluble [Source:HGNC Symbol;Acc:11830]	-1.60348	5.25505	229.092	9.40638e-52	5.44137e-50
ENSG00000169607	CKAP2L	cytoskeleton associated protein 2-like [Source:HGNC Symbol;Acc:26877]	-1.46611	5.61606	227.904	1.70792e-51	9.84146e-50
ENSG00000152253	SPC25	SPC25, NDC80 kinetochore complex component, homolog (S. cerevisiae) [Source:HGNC Symbol;Acc:24031]	-1.60596	4.94904	227.75	1.84563e-51	1.05937e-49
ENSG00000181019	NQO1	NAD(P)H dehydrogenase, quinone 1 [Source:HGNC Symbol;Acc:2874]	1.40307	5.39378	225.103	6.97097e-51	3.98583e-49
ENSG00000050030	KIAA2022	KIAA2022 [Source:HGNC Symbol;Acc:29433]	-1.4424	5.18973	224.653	8.73879e-51	4.97741e-49
ENSG00000163394	CCKAR	cholecystokinin A receptor [Source:HGNC Symbol;Acc:1570]	-3.17234	2.31504	224.578	9.073e-51	5.14797e-49
ENSG00000100714	MTHFD1	methylenetetrahydrofolate dehydrogenase (NADP+ dependent) 1, methenyltetrahydrofolate cyclohydrolase, formyltetrahydrofolate synthetase [Source:HGNC Symbol;Acc:7432]	-0.93929	7.38434	224.362	1.01171e-50	5.71847e-49
ENSG00000115687	PASK	PAS domain containing serine/threonine kinase [Source:HGNC Symbol;Acc:17270]	-1.42426	5.47126	223.013	1.99187e-50	1.12158e-48
ENSG00000165480	SKA3	spindle and kinetochore associated complex subunit 3 [Source:HGNC Symbol;Acc:20262]	-1.379	5.70409	222.994	2.01093e-50	1.12803e-48
ENSG00000163071	SPATA18	spermatogenesis associated 18 [Source:HGNC Symbol;Acc:29579]	1.82108	4.28419	222.416	2.68814e-50	1.50221e-48
ENSG00000101868	POLA1	polymerase (DNA directed), alpha 1, catalytic subunit [Source:HGNC Symbol;Acc:9173]	-1.07139	6.64028	221.024	5.40818e-50	3.01089e-48
ENSG00000166130	IKBIP	IKBKB interacting protein [Source:HGNC Symbol;Acc:26430]	1.34424	5.4561	220.951	5.60996e-50	3.11153e-48
ENSG00000171094	ALK	anaplastic lymphoma receptor tyrosine kinase [Source:HGNC Symbol;Acc:427]	-1.8805	4.37293	218.602	1.82565e-49	1.00881e-47
ENSG00000116133	DHCR24	24-dehydrocholesterol reductase [Source:HGNC Symbol;Acc:2859]	-0.949118	8.12687	218.106	2.34193e-49	1.28928e-47
ENSG00000189403	HMGB1	high mobility group box 1 [Source:HGNC Symbol;Acc:4983]	-0.793973	10.038	217.516	3.14892e-49	1.72712e-47
ENSG00000138735	PDE5A	phosphodiesterase 5A, cGMP-specific [Source:HGNC Symbol;Acc:8784]	1.12354	6.10268	216.55	5.11624e-49	2.79581e-47
ENSG00000121152	NCAPH	non-SMC condensin I complex, subunit H [Source:HGNC Symbol;Acc:1112]	-1.12048	6.39893	216.126	6.32898e-49	3.4458e-47
ENSG00000138376	BARD1	BRCA1 associated RING domain 1 [Source:HGNC Symbol;Acc:952]	-1.47491	5.38375	215.919	7.02362e-49	3.80999e-47
ENSG00000177707	PVRL3	poliovirus receptor-related 3 [Source:HGNC Symbol;Acc:17664]	-1.06467	6.37854	215.804	7.44037e-49	4.02133e-47
ENSG00000149256	ODZ4	odz, odd Oz/ten-m homolog 4 (Drosophila) [Source:HGNC Symbol;Acc:29945]	-1.15346	5.97452	215.652	8.03422e-49	4.3265e-47
ENSG00000151692	RNF144A	ring finger protein 144A [Source:HGNC Symbol;Acc:20457]	-1.102	6.38138	215.184	1.01631e-48	5.45307e-47
ENSG00000162607	USP1	ubiquitin specific peptidase 1 [Source:HGNC Symbol;Acc:12607]	-0.948681	8.8446	214.711	1.28872e-48	6.88976e-47
ENSG00000080546	SESN1	sestrin 1 [Source:HGNC Symbol;Acc:21595]	1.33425	5.43877	214.106	1.74638e-48	9.30294e-47
ENSG00000105011	ASF1B	ASF1 anti-silencing function 1 homolog B (S. cerevisiae) [Source:HGNC Symbol;Acc:20996]	-1.64038	4.77115	213.915	1.92238e-48	1.02037e-46
ENSG00000162992	NEUROD1	neuronal differentiation 1 [Source:HGNC Symbol;Acc:7762]	-0.849871	8.11825	213.884	1.95228e-48	1.03255e-46
ENSG00000197771	MCMBP	minichromosome maintenance complex binding protein [Source:HGNC Symbol;Acc:25782]	-0.900371	7.6242	212.889	3.21736e-48	1.69559e-46
ENSG00000006007	GDE1	glycerophosphodiester phosphodiesterase 1 [Source:HGNC Symbol;Acc:29644]	1.06249	6.28573	212.229	4.48416e-48	2.35482e-46
ENSG00000261115	TMEM178B	transmembrane protein 178B [Source:HGNC Symbol;Acc:44112]	1.33683	5.46665	211.142	7.73966e-48	4.05006e-46
ENSG00000052850	ALX4	ALX homeobox 4 [Source:HGNC Symbol;Acc:450]	-2.24533	3.50159	211.105	7.88321e-48	4.11065e-46
ENSG00000123384	LRP1	low density lipoprotein receptor-related protein 1 [Source:HGNC Symbol;Acc:6692]	1.4663	6.31156	210.602	1.01516e-47	5.2749e-46
ENSG00000081870	HSPB11	heat shock protein family B (small), member 11 [Source:HGNC Symbol;Acc:25019]	-1.42607	5.29274	210.29	1.18749e-47	6.14881e-46
ENSG00000014138	POLA2	polymerase (DNA directed), alpha 2, accessory subunit [Source:HGNC Symbol;Acc:30073]	-1.32872	5.62165	209.846	1.484e-47	7.65731e-46
ENSG00000026652	AGPAT4	1-acylglycerol-3-phosphate O-acyltransferase 4 (lysophosphatidic acid acyltransferase, delta) [Source:HGNC Symbol;Acc:20885]	1.08338	6.16861	209.277	1.97516e-47	1.01563e-45
ENSG00000146648	EGFR	epidermal growth factor receptor [Source:HGNC Symbol;Acc:3236]	-2.25315	3.26699	209.078	2.18262e-47	1.11842e-45
ENSG00000261597	RP11-353B9.1		1.64882	4.35931	208.394	3.07855e-47	1.57208e-45
ENSG00000179335	CLK3	CDC-like kinase 3 [Source:HGNC Symbol;Acc:2071]	1.49946	5.59393	207.699	4.36387e-47	2.22078e-45
ENSG00000143228	NUF2	NUF2, NDC80 kinetochore complex component, homolog (S. cerevisiae) [Source:HGNC Symbol;Acc:14621]	-1.00946	7.4233	207.461	4.91874e-47	2.49458e-45
ENSG00000111859	NEDD9	neural precursor cell expressed, developmentally down-regulated 9 [Source:HGNC Symbol;Acc:7733]	-1.63989	4.55403	207.353	5.19286e-47	2.62461e-45
ENSG00000166016	ABTB2	ankyrin repeat and BTB (POZ) domain containing 2 [Source:HGNC Symbol;Acc:23842]	3.3942	2.04407	207.31	5.30576e-47	2.67255e-45
ENSG00000143333	RGS16	regulator of G-protein signaling 16 [Source:HGNC Symbol;Acc:9997]	5.97184	0.985109	207.208	5.58361e-47	2.80297e-45
ENSG00000178031	ADAMTSL1	ADAMTS-like 1 [Source:HGNC Symbol;Acc:14632]	-3.84916	1.69361	207.116	5.85054e-47	2.92705e-45
ENSG00000174799	CEP135	centrosomal protein 135kDa [Source:HGNC Symbol;Acc:29086]	1.28615	6.08912	206.938	6.39491e-47	3.18863e-45
ENSG00000197622	CDC42SE1	CDC42 small effector 1 [Source:HGNC Symbol;Acc:17719]	0.84435	8.18194	205.96	1.04558e-46	5.19596e-45
ENSG00000085465	OVGP1	oviductal glycoprotein 1, 120kDa [Source:HGNC Symbol;Acc:8524]	4.13118	1.55488	205.427	1.36644e-46	6.76774e-45
ENSG00000163655	GMPS	guanine monphosphate synthetase [Source:HGNC Symbol;Acc:4378]	-1.00509	7.18903	202.912	4.83585e-46	2.38714e-44
ENSG00000140600	SH3GL3	SH3-domain GRB2-like 3 [Source:HGNC Symbol;Acc:10832]	-1.84771	3.77806	202.855	4.97609e-46	2.44821e-44
ENSG00000090889	KIF4A	kinesin family member 4A [Source:HGNC Symbol;Acc:13339]	-1.02287	6.5322	201.379	1.04474e-45	5.12304e-44
ENSG00000125885	MCM8	minichromosome maintenance complex component 8 [Source:HGNC Symbol;Acc:16147]	-0.999918	6.55688	200.418	1.69299e-45	8.27444e-44
ENSG00000102384	CENPI	centromere protein I [Source:HGNC Symbol;Acc:3968]	-1.53687	4.96942	199.951	2.1408e-45	1.04286e-43
ENSG00000165661	QSOX2	quiescin Q6 sulfhydryl oxidase 2 [Source:HGNC Symbol;Acc:30249]	1.02741	6.61871	198.61	4.19831e-45	2.03845e-43
ENSG00000175643	RMI2	RMI2, RecQ mediated genome instability 2, homolog (S. cerevisiae) [Source:HGNC Symbol;Acc:28349]	-1.63449	4.35342	198.108	5.40512e-45	2.61583e-43
ENSG00000128039	SRD5A3	steroid 5 alpha-reductase 3 [Source:HGNC Symbol;Acc:25812]	-1.74363	4.27812	197.817	6.25418e-45	3.01688e-43
ENSG00000123219	CENPK	centromere protein K [Source:HGNC Symbol;Acc:29479]	-1.33861	5.621	197.338	7.95541e-45	3.82505e-43
ENSG00000087074	PPP1R15A	protein phosphatase 1, regulatory subunit 15A [Source:HGNC Symbol;Acc:14375]	1.54598	4.41803	197.214	8.47034e-45	4.05946e-43
ENSG00000077514	POLD3	polymerase (DNA-directed), delta 3, accessory subunit [Source:HGNC Symbol;Acc:20932]	-1.13251	6.30276	196.374	1.29184e-44	6.15922e-43
ENSG00000129195	FAM64A	family with sequence similarity 64, member A [Source:HGNC Symbol;Acc:25483]	-1.28373	5.58808	196.371	1.29348e-44	6.15922e-43
ENSG00000172201	ID4	inhibitor of DNA binding 4, dominant negative helix-loop-helix protein [Source:HGNC Symbol;Acc:5363]	1.66861	4.11925	196.165	1.43451e-44	6.80888e-43
ENSG00000113328	CCNG1	cyclin G1 [Source:HGNC Symbol;Acc:1592]	0.916423	7.81467	195.892	1.64551e-44	7.7854e-43
ENSG00000137807	KIF23	kinesin family member 23 [Source:HGNC Symbol;Acc:6392]	-0.956822	7.23755	195.81	1.71487e-44	8.08774e-43
ENSG00000168621	GDNF	glial cell derived neurotrophic factor [Source:HGNC Symbol;Acc:4232]	4.33373	1.10591	195.696	1.816e-44	8.53749e-43
ENSG00000123080	CDKN2C	cyclin-dependent kinase inhibitor 2C (p18, inhibits CDK4) [Source:HGNC Symbol;Acc:1789]	-1.14947	5.90743	195.523	1.9808e-44	9.28282e-43
ENSG00000166736	HTR3A	5-hydroxytryptamine (serotonin) receptor 3A, ionotropic [Source:HGNC Symbol;Acc:5297]	-2.91437	2.52896	195.299	2.21665e-44	1.03553e-42
ENSG00000138386	NAB1	NGFI-A binding protein 1 (EGR1 binding protein 1) [Source:HGNC Symbol;Acc:7626]	-1.08915	6.23746	193.918	4.43822e-44	2.06684e-42
ENSG00000029993	HMGB3	high mobility group box 3 [Source:HGNC Symbol;Acc:5004]	-0.874769	7.63294	192.894	7.42565e-44	3.44722e-42
ENSG00000184205	TSPYL2	TSPY-like 2 [Source:HGNC Symbol;Acc:24358]	1.56173	4.76559	192.297	1.00205e-43	4.63729e-42
ENSG00000142149	HUNK	hormonally up-regulated Neu-associated kinase [Source:HGNC Symbol;Acc:13326]	-1.30612	5.45178	192.152	1.07822e-43	4.97424e-42
ENSG00000163297	ANTXR2	anthrax toxin receptor 2 [Source:HGNC Symbol;Acc:21732]	-0.853717	7.77067	191.682	1.36499e-43	6.27767e-42
ENSG00000205978	NYNRIN	NYN domain and retroviral integrase containing [Source:HGNC Symbol;Acc:20165]	1.30952	5.22577	191.281	1.66963e-43	7.65498e-42
ENSG00000101911	PRPS2	phosphoribosyl pyrophosphate synthetase 2 [Source:HGNC Symbol;Acc:9465]	-1.3344	5.37731	191.19	1.7486e-43	7.99231e-42
ENSG00000184611	KCNH7	potassium voltage-gated channel, subfamily H (eag-related), member 7 [Source:HGNC Symbol;Acc:18863]	-1.38233	5.06859	191.048	1.87722e-43	8.55376e-42
ENSG00000100297	MCM5	minichromosome maintenance complex component 5 [Source:HGNC Symbol;Acc:6948]	-1.35263	5.99372	190.346	2.67162e-43	1.21362e-41
ENSG00000168646	AXIN2	axin 2 [Source:HGNC Symbol;Acc:904]	1.28423	5.9341	189.55	3.9856e-43	1.80498e-41
ENSG00000101003	GINS1	GINS complex subunit 1 (Psf1 homolog) [Source:HGNC Symbol;Acc:28980]	-1.0463	6.38518	188.914	5.48692e-43	2.47731e-41
ENSG00000179820	MYADM	myeloid-associated differentiation marker [Source:HGNC Symbol;Acc:7544]	1.84037	3.76259	188.859	5.64214e-43	2.53965e-41
ENSG00000206538	VGLL3	vestigial like 3 (Drosophila) [Source:HGNC Symbol;Acc:24327]	-1.91553	3.53897	187.605	1.05962e-42	4.75512e-41
ENSG00000008405	CRY1	cryptochrome 1 (photolyase-like) [Source:HGNC Symbol;Acc:2384]	1.06229	6.09191	187.51	1.11152e-42	4.97294e-41
ENSG00000128050	PAICS	phosphoribosylaminoimidazole carboxylase, phosphoribosylaminoimidazole succinocarboxamide synthetase [Source:HGNC Symbol;Acc:8587]	-0.739338	9.48311	187.318	1.22375e-42	5.45861e-41
ENSG00000146938	NLGN4X	neuroligin 4, X-linked [Source:HGNC Symbol;Acc:14287]	-1.22573	5.44594	186.944	1.47693e-42	6.56811e-41
ENSG00000242125	SNHG3	small nucleolar RNA host gene 3 (non-protein coding) [Source:HGNC Symbol;Acc:10118]	0.842506	7.36908	186.842	1.55459e-42	6.89279e-41
ENSG00000083720	OXCT1	3-oxoacid CoA transferase 1 [Source:HGNC Symbol;Acc:8527]	-1.09572	6.04506	186.291	2.05086e-42	9.06602e-41
ENSG00000180828	BHLHE22	basic helix-loop-helix family, member e22 [Source:HGNC Symbol;Acc:11963]	-1.6043	4.59812	184.769	4.40781e-42	1.94272e-40
ENSG00000159147	DONSON	downstream neighbor of SON [Source:HGNC Symbol;Acc:2993]	-1.3143	5.39606	184.256	5.70394e-42	2.50652e-40
ENSG00000104635	SLC39A14	solute carrier family 39 (zinc transporter), member 14 [Source:HGNC Symbol;Acc:20858]	0.83625	7.48148	184.12	6.1086e-42	2.6764e-40
ENSG00000103257	SLC7A5	solute carrier family 7 (amino acid transporter light chain, L system), member 5 [Source:HGNC Symbol;Acc:11063]	1.51399	6.10065	183.896	6.83717e-42	2.98677e-40
ENSG00000119333	WDR34	WD repeat domain 34 [Source:HGNC Symbol;Acc:28296]	-1.40859	5.57797	183.726	7.44504e-42	3.24275e-40
ENSG00000058056	USP13	ubiquitin specific peptidase 13 (isopeptidase T-3) [Source:HGNC Symbol;Acc:12611]	-0.971051	6.47179	183.526	8.23546e-42	3.57651e-40
ENSG00000005108	THSD7A	thrombospondin, type I, domain containing 7A [Source:HGNC Symbol;Acc:22207]	2.16896	2.90864	183.292	9.26324e-42	4.01109e-40
ENSG00000135951	TSGA10	testis specific, 10 [Source:HGNC Symbol;Acc:14927]	3.79153	1.35154	182.648	1.28027e-41	5.52757e-40
ENSG00000198794	SCAMP5	secretory carrier membrane protein 5 [Source:HGNC Symbol;Acc:30386]	0.956066	7.1578	182.365	1.4758e-41	6.35324e-40
ENSG00000170312	CDK1	cyclin-dependent kinase 1 [Source:HGNC Symbol;Acc:1722]	-0.912093	7.68226	182.332	1.50083e-41	6.44225e-40
ENSG00000088325	TPX2	TPX2, microtubule-associated, homolog (Xenopus laevis) [Source:HGNC Symbol;Acc:1249]	-0.872803	8.18308	182.034	1.74351e-41	7.46233e-40
ENSG00000204387	C6orf48	chromosome 6 open reading frame 48 [Source:HGNC Symbol;Acc:19078]	1.06815	5.9332	181.606	2.16111e-41	9.223e-40
ENSG00000112312	GMNN	geminin, DNA replication inhibitor [Source:HGNC Symbol;Acc:17493]	-1.04423	6.27876	181.56	2.21164e-41	9.41155e-40
ENSG00000203727	SAMD5	sterile alpha motif domain containing 5 [Source:HGNC Symbol;Acc:21180]	3.64036	1.41417	181.392	2.407e-41	1.02135e-39
ENSG00000171004	HS6ST2	heparan sulfate 6-O-sulfotransferase 2 [Source:HGNC Symbol;Acc:19133]	1.24664	5.61867	181.373	2.43024e-41	1.02827e-39
ENSG00000136518	ACTL6A	actin-like 6A [Source:HGNC Symbol;Acc:24124]	-0.910276	7.09441	181.061	2.84288e-41	1.19944e-39
ENSG00000173706	HEG1	HEG homolog 1 (zebrafish) [Source:HGNC Symbol;Acc:29227]	-0.989558	6.33319	181.027	2.89214e-41	1.21675e-39
ENSG00000145431	PDGFC	platelet derived growth factor C [Source:HGNC Symbol;Acc:8801]	1.54385	4.5489	180.578	3.62375e-41	1.52023e-39
ENSG00000161513	FDXR	ferredoxin reductase [Source:HGNC Symbol;Acc:3642]	2.01017	4.51112	180.121	4.56039e-41	1.90776e-39
ENSG00000181072	CHRM2	cholinergic receptor, muscarinic 2 [Source:HGNC Symbol;Acc:1951]	-1.24072	5.21509	179.694	5.65381e-41	2.35851e-39
ENSG00000130517	PGPEP1	pyroglutamyl-peptidase I [Source:HGNC Symbol;Acc:13568]	1.52595	4.3148	179.387	6.59466e-41	2.74327e-39
ENSG00000170345	FOS	FBJ murine osteosarcoma viral oncogene homolog [Source:HGNC Symbol;Acc:3796]	3.30034	1.51278	179.094	7.64295e-41	3.17043e-39
ENSG00000119139	TJP2	tight junction protein 2 [Source:HGNC Symbol;Acc:11828]	-1.64928	4.36494	178.988	8.0621e-41	3.33496e-39
ENSG00000166508	MCM7	minichromosome maintenance complex component 7 [Source:HGNC Symbol;Acc:6950]	-0.906432	8.01775	178.699	9.32173e-41	3.84528e-39
ENSG00000197121	PGAP1	post-GPI attachment to proteins 1 [Source:HGNC Symbol;Acc:25712]	0.885375	7.0829	178.439	1.06257e-40	4.37099e-39
ENSG00000118193	KIF14	kinesin family member 14 [Source:HGNC Symbol;Acc:19181]	-0.902259	7.03137	178.165	1.21949e-40	5.00261e-39
ENSG00000149636	DSN1	DSN1, MIND kinetochore complex component, homolog (S. cerevisiae) [Source:HGNC Symbol;Acc:16165]	-1.09953	5.78587	178.123	1.24545e-40	5.09497e-39
ENSG00000138346	DNA2	DNA replication helicase 2 homolog (yeast) [Source:HGNC Symbol;Acc:2939]	-1.21474	6.52636	177.464	1.734e-40	7.07406e-39
ENSG00000038274	MAT2B	methionine adenosyltransferase II, beta [Source:HGNC Symbol;Acc:6905]	-0.890232	7.59874	177.049	2.13638e-40	8.69165e-39
ENSG00000104725	NEFL	neurofilament, light polypeptide [Source:HGNC Symbol;Acc:7739]	0.986044	6.22078	177.024	2.16426e-40	8.78095e-39
ENSG00000164109	MAD2L1	MAD2 mitotic arrest deficient-like 1 (yeast) [Source:HGNC Symbol;Acc:6763]	-0.916191	7.75033	176.911	2.29062e-40	9.26825e-39
ENSG00000187653	TMSB4XP8	thymosin beta 4, X-linked pseudogene 8 [Source:HGNC Symbol;Acc:11885]	-1.22775	5.28619	176.886	2.31933e-40	9.35884e-39
ENSG00000119630	PGF	placental growth factor [Source:HGNC Symbol;Acc:8893]	1.70409	4.49421	176.827	2.38969e-40	9.61654e-39
ENSG00000143401	ANP32E	acidic (leucine-rich) nuclear phosphoprotein 32 family, member E [Source:HGNC Symbol;Acc:16673]	-0.775997	10.3708	176.733	2.50536e-40	1.00547e-38
ENSG00000105173	CCNE1	cyclin E1 [Source:HGNC Symbol;Acc:1589]	-1.59151	4.32086	176.56	2.73295e-40	1.09384e-38
ENSG00000119326	CTNNAL1	catenin (cadherin-associated protein), alpha-like 1 [Source:HGNC Symbol;Acc:2512]	-1.12994	5.96607	176.389	2.97706e-40	1.18834e-38
ENSG00000189184	PCDH18	protocadherin 18 [Source:HGNC Symbol;Acc:14268]	1.38624	4.89867	175.787	4.03006e-40	1.60433e-38
ENSG00000134684	YARS	tyrosyl-tRNA synthetase [Source:HGNC Symbol;Acc:12840]	0.79849	7.92571	175.684	4.24465e-40	1.68523e-38
ENSG00000106462	EZH2	enhancer of zeste homolog 2 (Drosophila) [Source:HGNC Symbol;Acc:3527]	-0.844287	7.34519	175.222	5.35583e-40	2.12071e-38
ENSG00000111445	RFC5	replication factor C (activator 1) 5, 36.5kDa [Source:HGNC Symbol;Acc:9973]	-1.07341	6.02071	174.753	6.77765e-40	2.67654e-38
ENSG00000181541	MAB21L2	mab-21-like 2 (C. elegans) [Source:HGNC Symbol;Acc:6758]	1.19514	5.70903	174.747	6.7987e-40	2.67771e-38
ENSG00000168003	SLC3A2	solute carrier family 3 (activators of dibasic and neutral amino acid transport), member 2 [Source:HGNC Symbol;Acc:11026]	1.0812	6.66759	174.6	7.32079e-40	2.87569e-38
ENSG00000164985	PSIP1	PC4 and SFRS1 interacting protein 1 [Source:HGNC Symbol;Acc:9527]	-0.821423	8.05716	174.484	7.76242e-40	3.0411e-38
ENSG00000169045	HNRNPH1	heterogeneous nuclear ribonucleoprotein H1 (H) [Source:HGNC Symbol;Acc:5041]	0.748315	10.479	173.922	1.02964e-39	4.02319e-38
ENSG00000155545	MIER3	mesoderm induction early response 1, family member 3 [Source:HGNC Symbol;Acc:26678]	0.865996	6.909	173.907	1.03735e-39	4.04267e-38
ENSG00000148672	GLUD1	glutamate dehydrogenase 1 [Source:HGNC Symbol;Acc:4335]	-0.944232	6.68597	173.778	1.10668e-39	4.30152e-38
ENSG00000170264	FAM161A	family with sequence similarity 161, member A [Source:HGNC Symbol;Acc:25808]	-1.40805	5.00346	173.71	1.14536e-39	4.44021e-38
ENSG00000165194	PCDH19	protocadherin 19 [Source:HGNC Symbol;Acc:14270]	-1.54494	4.46958	173.668	1.1699e-39	4.52351e-38
ENSG00000104369	JPH1	junctophilin 1 [Source:HGNC Symbol;Acc:14201]	-1.87518	3.89745	173.527	1.25593e-39	4.84352e-38
ENSG00000162738	VANGL2	vang-like 2 (van gogh, Drosophila) [Source:HGNC Symbol;Acc:15511]	0.772224	8.50035	173.346	1.37516e-39	5.28953e-38
ENSG00000007968	E2F2	E2F transcription factor 2 [Source:HGNC Symbol;Acc:3114]	-2.07314	3.513	172.598	2.00309e-39	7.6849e-38
ENSG00000088832	FKBP1A	FK506 binding protein 1A, 12kDa [Source:HGNC Symbol;Acc:3711]	-0.794583	7.65234	172.527	2.07616e-39	7.94466e-38
ENSG00000117616	C1orf63	chromosome 1 open reading frame 63 [Source:HGNC Symbol;Acc:25234]	1.29117	6.30718	171.764	3.04751e-39	1.16316e-37
ENSG00000170419	VSTM2A	V-set and transmembrane domain containing 2A [Source:HGNC Symbol;Acc:28499]	-1.15835	5.68188	171.559	3.37729e-39	1.28571e-37
ENSG00000155367	PPM1J	protein phosphatase, Mg2+/Mn2+ dependent, 1J [Source:HGNC Symbol;Acc:20785]	-4.37377	1.12728	171.378	3.70057e-39	1.40517e-37
ENSG00000177410	ZNFX1-AS1	ZNFX1 antisense RNA 1 [Source:HGNC Symbol;Acc:33101]	0.967853	6.34001	169.931	7.65986e-39	2.90115e-37
ENSG00000169679	BUB1	budding uninhibited by benzimidazoles 1 homolog (yeast) [Source:HGNC Symbol;Acc:1148]	-0.854396	7.23991	169.696	8.62093e-39	3.25682e-37
ENSG00000168209	DDIT4	DNA-damage-inducible transcript 4 [Source:HGNC Symbol;Acc:24944]	1.12717	6.26273	169.672	8.7273e-39	3.28862e-37
ENSG00000141480	ARRB2	arrestin, beta 2 [Source:HGNC Symbol;Acc:712]	-1.31385	5.23635	169.082	1.17407e-38	4.4129e-37
ENSG00000143376	SNX27	sorting nexin family member 27 [Source:HGNC Symbol;Acc:20073]	0.809887	7.8591	168.944	1.25847e-38	4.71814e-37
ENSG00000154917	RAB6B	RAB6B, member RAS oncogene family [Source:HGNC Symbol;Acc:14902]	1.29393	4.94222	168.714	1.41287e-38	5.28362e-37
ENSG00000053254	FOXN3	forkhead box N3 [Source:HGNC Symbol;Acc:1928]	0.754236	7.75388	168.683	1.43494e-38	5.35266e-37
ENSG00000082213	C5orf22	chromosome 5 open reading frame 22 [Source:HGNC Symbol;Acc:25639]	-1.06861	6.17751	168.227	1.80488e-38	6.7157e-37
ENSG00000196586	MYO6	myosin VI [Source:HGNC Symbol;Acc:7605]	0.989047	6.14727	167.673	2.38411e-38	8.84871e-37
ENSG00000163629	PTPN13	protein tyrosine phosphatase, non-receptor type 13 (APO-1/CD95 (Fas)-associated phosphatase) [Source:HGNC Symbol;Acc:9646]	0.720673	8.3018	166.231	4.925e-38	1.82336e-36
ENSG00000197081	IGF2R	insulin-like growth factor 2 receptor [Source:HGNC Symbol;Acc:5467]	0.804514	7.99266	165.934	5.71952e-38	2.11223e-36
ENSG00000096060	FKBP5	FK506 binding protein 5 [Source:HGNC Symbol;Acc:3721]	-0.941466	6.74325	165.838	6.00252e-38	2.21123e-36
ENSG00000188641	DPYD	dihydropyrimidine dehydrogenase [Source:HGNC Symbol;Acc:3012]	-1.79472	3.787	165.697	6.44089e-38	2.36683e-36
ENSG00000035862	TIMP2	TIMP metallopeptidase inhibitor 2 [Source:HGNC Symbol;Acc:11821]	-0.739162	8.38711	165.612	6.72502e-38	2.46512e-36
ENSG00000120875	DUSP4	dual specificity phosphatase 4 [Source:HGNC Symbol;Acc:3070]	1.99067	3.06116	165.185	8.33689e-38	3.04842e-36
ENSG00000162601	MYSM1	Myb-like, SWIRM and MPN domains 1 [Source:HGNC Symbol;Acc:29401]	0.819545	7.6305	165.161	8.4361e-38	3.0771e-36
ENSG00000130522	JUND	jun D proto-oncogene [Source:HGNC Symbol;Acc:6206]	1.27397	5.41595	165.024	9.03568e-38	3.28461e-36
ENSG00000188313	PLSCR1	phospholipid scramblase 1 [Source:HGNC Symbol;Acc:9092]	-1.3973	4.76309	165.018	9.0654e-38	3.28461e-36
ENSG00000206384	COL6A6	collagen, type VI, alpha 6 [Source:HGNC Symbol;Acc:27023]	-3.28972	1.88974	165.017	9.07154e-38	3.28461e-36
ENSG00000171940	ZNF217	zinc finger protein 217 [Source:HGNC Symbol;Acc:13009]	-0.911065	6.53168	164.826	9.98302e-38	3.60582e-36
ENSG00000099994	SUSD2	sushi domain containing 2 [Source:HGNC Symbol;Acc:30667]	-4.73754	1.24025	164.45	1.20613e-37	4.34587e-36
ENSG00000124767	GLO1	glyoxalase I [Source:HGNC Symbol;Acc:4323]	-0.77936	8.45242	164.392	1.24215e-37	4.4648e-36
ENSG00000051180	RAD51	RAD51 homolog (S. cerevisiae) [Source:HGNC Symbol;Acc:9817]	-1.32015	4.83292	164.287	1.30915e-37	4.69423e-36
ENSG00000100814	CCNB1IP1	cyclin B1 interacting protein 1, E3 ubiquitin protein ligase [Source:HGNC Symbol;Acc:19437]	0.83321	7.12887	164.154	1.40015e-37	5.00841e-36
ENSG00000145604	SKP2	S-phase kinase-associated protein 2, E3 ubiquitin protein ligase [Source:HGNC Symbol;Acc:10901]	-0.740179	8.11918	163.948	1.55276e-37	5.54091e-36
ENSG00000143149	ALDH9A1	aldehyde dehydrogenase 9 family, member A1 [Source:HGNC Symbol;Acc:412]	-0.821974	7.1536	163.758	1.70862e-37	6.08245e-36
ENSG00000165655	ZNF503	zinc finger protein 503 [Source:HGNC Symbol;Acc:23589]	1.54834	4.30509	163.407	2.03898e-37	7.24108e-36
ENSG00000106804	C5	complement component 5 [Source:HGNC Symbol;Acc:1331]	-2.22688	3.24144	163.285	2.16725e-37	7.67818e-36
ENSG00000063180	CA11	carbonic anhydrase XI [Source:HGNC Symbol;Acc:1370]	1.52035	4.63374	163.042	2.44946e-37	8.65731e-36
ENSG00000173846	PLK3	polo-like kinase 3 [Source:HGNC Symbol;Acc:2154]	2.00281	2.98898	163	2.50162e-37	8.82059e-36
ENSG00000092964	DPYSL2	dihydropyrimidinase-like 2 [Source:HGNC Symbol;Acc:3014]	-0.934689	6.89133	162.992	2.51118e-37	8.83328e-36
ENSG00000217128	FNIP1	folliculin interacting protein 1 [Source:HGNC Symbol;Acc:29418]	1.14057	5.52952	162.793	2.77621e-37	9.72748e-36
ENSG00000108578	BLMH	bleomycin hydrolase [Source:HGNC Symbol;Acc:1059]	-0.773018	7.73016	162.791	2.77853e-37	9.72748e-36
ENSG00000111799	COL12A1	collagen, type XII, alpha 1 [Source:HGNC Symbol;Acc:2188]	4.36126	0.884233	161.951	4.24086e-37	1.4812e-35
ENSG00000111602	TIMELESS	timeless homolog (Drosophila) [Source:HGNC Symbol;Acc:11813]	-0.852716	7.47612	161.934	4.27628e-37	1.49006e-35
ENSG00000257167	TMPO-AS1	TMPO antisense RNA 1 [Source:HGNC Symbol;Acc:44158]	-2.1946	3.04902	161.87	4.41676e-37	1.5354e-35
ENSG00000224294	RP3-326I13.1		4.19165	0.95864	161.82	4.52979e-37	1.571e-35
ENSG00000164237	CMBL	carboxymethylenebutenolidase homolog (Pseudomonas) [Source:HGNC Symbol;Acc:25090]	1.07657	5.66807	161.801	4.57202e-37	1.58194e-35
ENSG00000196230	TUBB	tubulin, beta class I [Source:HGNC Symbol;Acc:20778]	-0.636278	11.2565	161.667	4.89209e-37	1.68874e-35
ENSG00000169375	SIN3A	SIN3 transcription regulator homolog A (yeast) [Source:HGNC Symbol;Acc:19353]	-0.956958	6.76612	161.372	5.67421e-37	1.95417e-35
ENSG00000151883	PARP8	poly (ADP-ribose) polymerase family, member 8 [Source:HGNC Symbol;Acc:26124]	2.03271	3.18009	160.95	7.01532e-37	2.41044e-35
ENSG00000101384	JAG1	jagged 1 [Source:HGNC Symbol;Acc:6188]	3.38953	2.04224	160.855	7.35877e-37	2.52259e-35
ENSG00000146918	NCAPG2	non-SMC condensin II complex, subunit G2 [Source:HGNC Symbol;Acc:21904]	-0.844483	6.9474	160.797	7.57675e-37	2.59132e-35
ENSG00000112118	MCM3	minichromosome maintenance complex component 3 [Source:HGNC Symbol;Acc:6945]	-0.733384	8.258	160.561	8.53056e-37	2.91081e-35
ENSG00000131153	GINS2	GINS complex subunit 2 (Psf2 homolog) [Source:HGNC Symbol;Acc:24575]	-1.50262	4.44684	159.728	1.29739e-36	4.41681e-35
ENSG00000057608	GDI2	GDP dissociation inhibitor 2 [Source:HGNC Symbol;Acc:4227]	-0.756665	8.71353	159.269	1.63475e-36	5.55252e-35
ENSG00000031698	SARS	seryl-tRNA synthetase [Source:HGNC Symbol;Acc:10537]	0.748955	8.1255	158.605	2.28318e-36	7.7372e-35
ENSG00000165102	HGSNAT	heparan-alpha-glucosaminide N-acetyltransferase [Source:HGNC Symbol;Acc:26527]	-1.23647	5.14567	157.273	4.46194e-36	1.5086e-34
ENSG00000245870	RP11-457P14.4		-1.26584	4.92623	157.232	4.55501e-36	1.53656e-34
ENSG00000171163	ZNF692	zinc finger protein 692 [Source:HGNC Symbol;Acc:26049]	1.35947	5.3479	156.923	5.32116e-36	1.79093e-34
ENSG00000261716	RP11-196G18.22		1.17505	5.89199	156.914	5.34618e-36	1.79527e-34
ENSG00000132780	NASP	nuclear autoantigenic sperm protein (histone-binding) [Source:HGNC Symbol;Acc:7644]	-0.698964	8.99893	156.897	5.391e-36	1.80623e-34
ENSG00000102317	RBM3	RNA binding motif (RNP1, RRM) protein 3 [Source:HGNC Symbol;Acc:9900]	-0.868377	7.82496	156.774	5.73556e-36	1.91733e-34
ENSG00000120088	CRHR1	corticotropin releasing hormone receptor 1 [Source:HGNC Symbol;Acc:2357]	-2.77025	2.04359	156.5	6.58132e-36	2.19511e-34
ENSG00000196776	CD47	CD47 molecule [Source:HGNC Symbol;Acc:1682]	0.826122	7.44157	156.4	6.92283e-36	2.30382e-34
ENSG00000186767	SPIN4	spindlin family, member 4 [Source:HGNC Symbol;Acc:27040]	-1.28286	4.96192	156.004	8.44802e-36	2.80508e-34
ENSG00000154767	XPC	xeroderma pigmentosum, complementation group C [Source:HGNC Symbol;Acc:12816]	0.958608	6.12256	155.994	8.4916e-36	2.81325e-34
ENSG00000068489	PRR11	proline rich 11 [Source:HGNC Symbol;Acc:25619]	-0.958388	6.24144	155.975	8.57457e-36	2.83439e-34
ENSG00000165704	HPRT1	hypoxanthine phosphoribosyltransferase 1 [Source:HGNC Symbol;Acc:5157]	-1.3095	5.36876	155.85	9.13013e-36	3.01131e-34
ENSG00000092201	SUPT16H	suppressor of Ty 16 homolog (S. cerevisiae) [Source:HGNC Symbol;Acc:11465]	-0.642289	9.27782	155.464	1.10871e-35	3.64863e-34
ENSG00000071539	TRIP13	thyroid hormone receptor interactor 13 [Source:HGNC Symbol;Acc:12307]	-0.901335	6.3112	155.389	1.15101e-35	3.77944e-34
ENSG00000100647	KIAA0247	KIAA0247 [Source:HGNC Symbol;Acc:19956]	1.43575	4.29374	154.703	1.62582e-35	5.32671e-34
ENSG00000058262	SEC61A1	Sec61 alpha 1 subunit (S. cerevisiae) [Source:HGNC Symbol;Acc:18276]	0.77919	8.18936	154.58	1.72942e-35	5.65362e-34
ENSG00000112984	KIF20A	kinesin family member 20A [Source:HGNC Symbol;Acc:9787]	-0.795541	7.22434	154.478	1.82063e-35	5.93871e-34
ENSG00000230124	RP5-1180C10.2		1.20541	4.95857	154.344	1.94783e-35	6.33966e-34
ENSG00000153187	HNRNPU	heterogeneous nuclear ribonucleoprotein U (scaffold attachment factor A) [Source:HGNC Symbol;Acc:5048]	-0.6191	10.3607	154.254	2.0382e-35	6.61923e-34
ENSG00000176697	BDNF	brain-derived neurotrophic factor [Source:HGNC Symbol;Acc:1033]	1.67273	3.92239	154.115	2.18581e-35	7.08307e-34
ENSG00000123485	HJURP	Holliday junction recognition protein [Source:HGNC Symbol;Acc:25444]	-0.961125	6.00057	154.023	2.28931e-35	7.40229e-34
ENSG00000165521	EML5	echinoderm microtubule associated protein like 5 [Source:HGNC Symbol;Acc:18197]	-0.812831	6.78501	153.586	2.85278e-35	9.20411e-34
ENSG00000124508	BTN2A2	butyrophilin, subfamily 2, member A2 [Source:HGNC Symbol;Acc:1137]	1.5654	4.19556	153.182	3.49587e-35	1.12544e-33
ENSG00000109685	WHSC1	Wolf-Hirschhorn syndrome candidate 1 [Source:HGNC Symbol;Acc:12766]	-0.702463	8.12385	152.97	3.88802e-35	1.24897e-33
ENSG00000196576	PLXNB2	plexin B2 [Source:HGNC Symbol;Acc:9104]	1.324	6.90416	152.963	3.90273e-35	1.25099e-33
ENSG00000136367	ZFHX2	zinc finger homeobox 2 [Source:HGNC Symbol;Acc:20152]	1.67573	3.99017	152.7	4.45401e-35	1.42461e-33
ENSG00000146729	GBAS	glioblastoma amplified sequence [Source:HGNC Symbol;Acc:4179]	-0.870979	6.98521	152.525	4.86444e-35	1.55253e-33
ENSG00000140534	TICRR	TOPBP1-interacting checkpoint and replication regulator [Source:HGNC Symbol;Acc:28704]	-0.933478	6.4941	151.992	6.36208e-35	2.02615e-33
ENSG00000142208	AKT1	v-akt murine thymoma viral oncogene homolog 1 [Source:HGNC Symbol;Acc:391]	-1.09799	6.30816	151.859	6.80345e-35	2.16207e-33
ENSG00000156671	SAMD8	sterile alpha motif domain containing 8 [Source:HGNC Symbol;Acc:26320]	1.03907	5.93274	151.797	7.01932e-35	2.22589e-33
ENSG00000128872	TMOD2	tropomodulin 2 (neuronal) [Source:HGNC Symbol;Acc:11872]	0.692337	8.29384	151.74	7.22195e-35	2.28525e-33
ENSG00000120327	PCDHB14	protocadherin beta 14 [Source:HGNC Symbol;Acc:8685]	1.56821	3.96818	151.195	9.50171e-35	3.00023e-33
ENSG00000066468	FGFR2	fibroblast growth factor receptor 2 [Source:HGNC Symbol;Acc:3689]	-1.22538	5.10742	151.157	9.68328e-35	3.05106e-33
ENSG00000159167	STC1	stanniocalcin 1 [Source:HGNC Symbol;Acc:11373]	-1.39836	4.42238	151.129	9.82236e-35	3.08831e-33
ENSG00000197989	SNHG12	small nucleolar RNA host gene 12 (non-protein coding) [Source:HGNC Symbol;Acc:30062]	1.15833	5.16333	151.073	1.01047e-34	3.17033e-33
ENSG00000101773	RBBP8	retinoblastoma binding protein 8 [Source:HGNC Symbol;Acc:9891]	-0.929068	6.21738	150.485	1.35836e-34	4.25286e-33
ENSG00000197063	MAFG	v-maf musculoaponeurotic fibrosarcoma oncogene homolog G (avian) [Source:HGNC Symbol;Acc:6781]	0.924191	6.51409	150.444	1.38651e-34	4.33182e-33
ENSG00000141560	FN3KRP	fructosamine 3 kinase related protein [Source:HGNC Symbol;Acc:25700]	-1.15804	5.14808	150.391	1.42372e-34	4.43872e-33
ENSG00000072041	SLC6A15	solute carrier family 6 (neutral amino acid transporter), member 15 [Source:HGNC Symbol;Acc:13621]	-0.887955	7.81869	150.327	1.47024e-34	4.57413e-33
ENSG00000157514	TSC22D3	TSC22 domain family, member 3 [Source:HGNC Symbol;Acc:3051]	1.35427	4.61972	150.282	1.50395e-34	4.66919e-33
ENSG00000163013	FBXO41	F-box protein 41 [Source:HGNC Symbol;Acc:29409]	1.19712	5.37404	150.226	1.5471e-34	4.79311e-33
ENSG00000087245	MMP2	matrix metallopeptidase 2 (gelatinase A, 72kDa gelatinase, 72kDa type IV collagenase) [Source:HGNC Symbol;Acc:7166]	1.23543	4.9776	150.144	1.61243e-34	4.98507e-33
ENSG00000228505	AC011897.2		-0.727872	7.75189	149.718	1.99764e-34	6.16312e-33
ENSG00000260248	RP11-143K11.1		-0.916943	6.72711	149.698	2.01825e-34	6.21377e-33
ENSG00000166483	WEE1	WEE1 homolog (S. pombe) [Source:HGNC Symbol;Acc:12761]	-0.939619	6.23663	149.691	2.0253e-34	6.22253e-33
ENSG00000075539	FRYL	FRY-like [Source:HGNC Symbol;Acc:29127]	0.745223	7.64575	149.685	2.03195e-34	6.23005e-33
ENSG00000167522	ANKRD11	ankyrin repeat domain 11 [Source:HGNC Symbol;Acc:21316]	0.922363	6.8812	149.441	2.29697e-34	7.02807e-33
ENSG00000000460	C1orf112	chromosome 1 open reading frame 112 [Source:HGNC Symbol;Acc:25565]	-1.12681	5.71391	149.295	2.47144e-34	7.5463e-33
ENSG00000087088	BAX	BCL2-associated X protein [Source:HGNC Symbol;Acc:959]	1.14228	6.03839	148.853	3.08728e-34	9.40731e-33
ENSG00000168675	C18orf1	chromosome 18 open reading frame 1 [Source:HGNC Symbol;Acc:1224]	-1.72758	3.53158	148.82	3.13991e-34	9.54804e-33
ENSG00000065150	IPO5	importin 5 [Source:HGNC Symbol;Acc:6402]	-0.669756	9.21651	148.686	3.35884e-34	1.01929e-32
ENSG00000078549	ADCYAP1R1	adenylate cyclase activating polypeptide 1 (pituitary) receptor type I [Source:HGNC Symbol;Acc:242]	0.850821	7.206	148.352	3.97427e-34	1.20358e-32
ENSG00000137404	NRM	nurim (nuclear envelope membrane protein) [Source:HGNC Symbol;Acc:8003]	-2.1339	3.12487	148.323	4.03259e-34	1.21875e-32
ENSG00000235370	CSPG4P5	chondroitin sulfate proteoglycan 4 pseudogene 5 [Source:HGNC Symbol;Acc:29403]	1.89581	4.016	148.09	4.53275e-34	1.36712e-32
ENSG00000134198	TSPAN2	tetraspanin 2 [Source:HGNC Symbol;Acc:20659]	1.60145	3.99937	147.979	4.79405e-34	1.44299e-32
ENSG00000171792	RHNO1	RAD9-HUS1-RAD1 interacting nuclear orphan 1 [Source:HGNC Symbol;Acc:28206]	-1.13111	5.33139	147.63	5.71436e-34	1.71651e-32
ENSG00000102057	KCND1	potassium voltage-gated channel, Shal-related subfamily, member 1 [Source:HGNC Symbol;Acc:6237]	4.24451	1.07601	147.312	6.7082e-34	2.01097e-32
ENSG00000213853	EMP2	epithelial membrane protein 2 [Source:HGNC Symbol;Acc:3334]	-1.09684	5.38641	147.297	6.75624e-34	2.02128e-32
ENSG00000165304	MELK	maternal embryonic leucine zipper kinase [Source:HGNC Symbol;Acc:16870]	-0.886723	6.47225	147.163	7.23089e-34	2.15892e-32
ENSG00000183943	PRKX	protein kinase, X-linked [Source:HGNC Symbol;Acc:9441]	0.789706	6.93226	146.754	8.88279e-34	2.64679e-32
ENSG00000120658	ENOX1	ecto-NOX disulfide-thiol exchanger 1 [Source:HGNC Symbol;Acc:25474]	-1.05549	5.6035	146.559	9.79727e-34	2.91341e-32
ENSG00000196139	AKR1C3	aldo-keto reductase family 1, member C3 (3-alpha hydroxysteroid dehydrogenase, type II) [Source:HGNC Symbol;Acc:386]	3.77805	1.10248	146.263	1.13702e-33	3.37437e-32
ENSG00000099725	PRKY	protein kinase, Y-linked, pseudogene [Source:HGNC Symbol;Acc:9444]	1.09746	5.34157	146.247	1.14635e-33	3.39526e-32
ENSG00000197467	COL13A1	collagen, type XIII, alpha 1 [Source:HGNC Symbol;Acc:2190]	-3.46452	1.2157	146.189	1.18061e-33	3.48974e-32
ENSG00000162511	LAPTM5	lysosomal protein transmembrane 5 [Source:HGNC Symbol;Acc:29612]	4.12174	0.988639	145.472	1.69326e-33	4.99511e-32
ENSG00000186174	BCL9L	B-cell CLL/lymphoma 9-like [Source:HGNC Symbol;Acc:23688]	1.77089	3.84754	145.351	1.79937e-33	5.29758e-32
ENSG00000242802	AP5Z1	adaptor-related protein complex 5, zeta 1 subunit [Source:HGNC Symbol;Acc:22197]	1.70438	4.15048	145.229	1.91398e-33	5.62384e-32
ENSG00000115758	ODC1	ornithine decarboxylase 1 [Source:HGNC Symbol;Acc:8109]	-0.62649	9.23104	144.818	2.354e-33	6.90306e-32
ENSG00000070214	SLC44A1	solute carrier family 44, member 1 [Source:HGNC Symbol;Acc:18798]	-0.851898	6.38694	144.229	3.16653e-33	9.26743e-32
ENSG00000138778	CENPE	centromere protein E, 312kDa [Source:HGNC Symbol;Acc:1856]	-0.879678	7.79597	144	3.55237e-33	1.03762e-31
ENSG00000147224	PRPS1	phosphoribosyl pyrophosphate synthetase 1 [Source:HGNC Symbol;Acc:9462]	-0.820655	6.69551	143.967	3.61173e-33	1.05288e-31
ENSG00000182199	SHMT2	serine hydroxymethyltransferase 2 (mitochondrial) [Source:HGNC Symbol;Acc:10852]	0.963593	7.16893	143.59	4.3684e-33	1.27096e-31
ENSG00000051825	MPHOSPH9	M-phase phosphoprotein 9 [Source:HGNC Symbol;Acc:7215]	-0.932416	6.361	142.975	5.95247e-33	1.72843e-31
ENSG00000112245	PTP4A1	protein tyrosine phosphatase type IVA, member 1 [Source:HGNC Symbol;Acc:9634]	0.775436	8.31796	142.362	8.10308e-33	2.34831e-31
ENSG00000145833	DDX46	DEAD (Asp-Glu-Ala-Asp) box polypeptide 46 [Source:HGNC Symbol;Acc:18681]	-0.706692	8.18742	142.305	8.34039e-33	2.41236e-31
ENSG00000118412	CASP8AP2	caspase 8 associated protein 2 [Source:HGNC Symbol;Acc:1510]	-0.841681	6.71753	142.266	8.50532e-33	2.45527e-31
ENSG00000162231	NXF1	nuclear RNA export factor 1 [Source:HGNC Symbol;Acc:8071]	0.84331	6.98631	142.236	8.63513e-33	2.48789e-31
ENSG00000138604	GLCE	glucuronic acid epimerase [Source:HGNC Symbol;Acc:17855]	-0.779316	7.16858	141.975	9.84889e-33	2.83208e-31
ENSG00000178999	AURKB	aurora kinase B [Source:HGNC Symbol;Acc:11390]	-1.08685	5.67157	141.915	1.01504e-32	2.91312e-31
ENSG00000113657	DPYSL3	dihydropyrimidinase-like 3 [Source:HGNC Symbol;Acc:3015]	0.727938	7.21218	141.853	1.04733e-32	2.99998e-31
ENSG00000213390	ARHGAP19	Rho GTPase activating protein 19 [Source:HGNC Symbol;Acc:23724]	-0.866821	6.37705	141.81	1.0702e-32	3.05956e-31
ENSG00000117593	DARS2	aspartyl-tRNA synthetase 2, mitochondrial [Source:HGNC Symbol;Acc:25538]	-0.86327	6.55901	141.516	1.24078e-32	3.54039e-31
ENSG00000100796	SMEK1	SMEK homolog 1, suppressor of mek1 (Dictyostelium) [Source:HGNC Symbol;Acc:20219]	0.720739	7.70952	141.349	1.35e-32	3.84464e-31
ENSG00000151422	FER	fer (fps/fes related) tyrosine kinase [Source:HGNC Symbol;Acc:3655]	-1.04883	5.54862	141.141	1.49853e-32	4.25945e-31
ENSG00000139734	DIAPH3	diaphanous homolog 3 (Drosophila) [Source:HGNC Symbol;Acc:15480]	-1.11148	5.29885	141.051	1.56808e-32	4.44861e-31
ENSG00000196167	C11orf92	chromosome 11 open reading frame 92 [Source:HGNC Symbol;Acc:33789]	-1.42445	4.07646	140.111	2.51729e-32	7.12782e-31
ENSG00000115760	BIRC6	baculoviral IAP repeat containing 6 [Source:HGNC Symbol;Acc:13516]	0.6821	8.04962	139.901	2.79834e-32	7.9085e-31
ENSG00000143494	VASH2	vasohibin 2 [Source:HGNC Symbol;Acc:25723]	-0.955125	6.16584	139.632	3.20395e-32	9.03759e-31
ENSG00000068971	PPP2R5B	protein phosphatase 2, regulatory subunit B', beta [Source:HGNC Symbol;Acc:9310]	1.75291	3.79293	139.459	3.49503e-32	9.8399e-31
ENSG00000197093	GAL3ST4	galactose-3-O-sulfotransferase 4 [Source:HGNC Symbol;Acc:24145]	1.75939	3.72456	139.098	4.19176e-32	1.17791e-30
ENSG00000155130	MARCKS	myristoylated alanine-rich protein kinase C substrate [Source:HGNC Symbol;Acc:6759]	-0.702295	8.61257	139.021	4.35746e-32	1.22215e-30
ENSG00000143507	DUSP10	dual specificity phosphatase 10 [Source:HGNC Symbol;Acc:3065]	2.02082	3.01581	138.987	4.43347e-32	1.24112e-30
ENSG00000160685	ZBTB7B	zinc finger and BTB domain containing 7B [Source:HGNC Symbol;Acc:18668]	1.94993	3.52229	138.859	4.72835e-32	1.32117e-30
ENSG00000140265	ZSCAN29	zinc finger and SCAN domain containing 29 [Source:HGNC Symbol;Acc:26673]	0.717215	7.26059	138.821	4.81943e-32	1.34409e-30
ENSG00000180801	ARSJ	arylsulfatase family, member J [Source:HGNC Symbol;Acc:26286]	1.51971	4.07563	138.428	5.87536e-32	1.63549e-30
ENSG00000161326	DUSP14	dual specificity phosphatase 14 [Source:HGNC Symbol;Acc:17007]	1.27113	4.48038	137.88	7.73984e-32	2.15046e-30
ENSG00000105063	PPP6R1	protein phosphatase 6, regulatory subunit 1 [Source:HGNC Symbol;Acc:29195]	1.06833	6.12805	137.56	9.09468e-32	2.52216e-30
ENSG00000167863	ATP5H	ATP synthase, H+ transporting, mitochondrial Fo complex, subunit d [Source:HGNC Symbol;Acc:845]	-0.690619	7.63727	136.925	1.25246e-31	3.46686e-30
ENSG00000119946	CNNM1	cyclin M1 [Source:HGNC Symbol;Acc:102]	1.08896	5.20968	136.806	1.32982e-31	3.67412e-30
ENSG00000169439	SDC2	syndecan 2 [Source:HGNC Symbol;Acc:10659]	-0.866793	6.39921	136.702	1.40138e-31	3.86462e-30
ENSG00000224660	AC087590.3		1.45336	3.98814	136.492	1.55768e-31	4.28767e-30
ENSG00000068078	FGFR3	fibroblast growth factor receptor 3 [Source:HGNC Symbol;Acc:3690]	-1.93021	2.97615	136.45	1.59056e-31	4.37005e-30
ENSG00000040275	CCDC99	coiled-coil domain containing 99 [Source:HGNC Symbol;Acc:26010]	-0.815578	6.9672	136.241	1.76735e-31	4.84679e-30
ENSG00000143515	ATP8B2	ATPase, aminophospholipid transporter, class I, type 8B, member 2 [Source:HGNC Symbol;Acc:13534]	0.828324	7.42183	136.07	1.92589e-31	5.27181e-30
ENSG00000177595	PIDD	p53-induced death domain protein [Source:HGNC Symbol;Acc:16491]	1.80954	4.23416	135.997	1.99879e-31	5.46128e-30
ENSG00000129534	MIS18BP1	MIS18 binding protein 1 [Source:HGNC Symbol;Acc:20190]	-0.873664	6.28409	135.951	2.04491e-31	5.577e-30
ENSG00000186591	UBE2H	ubiquitin-conjugating enzyme E2H [Source:HGNC Symbol;Acc:12484]	0.787548	6.60724	135.87	2.13007e-31	5.79858e-30
ENSG00000169155	ZBTB43	zinc finger and BTB domain containing 43 [Source:HGNC Symbol;Acc:17908]	1.03135	5.47885	135.758	2.25347e-31	6.12323e-30
ENSG00000053108	FSTL4	follistatin-like 4 [Source:HGNC Symbol;Acc:21389]	-2.55137	2.54044	135.594	2.44747e-31	6.63821e-30
ENSG00000071189	SNX13	sorting nexin 13 [Source:HGNC Symbol;Acc:21335]	0.935681	5.87833	135.196	2.99137e-31	8.09856e-30
ENSG00000170540	ARL6IP1	ADP-ribosylation factor-like 6 interacting protein 1 [Source:HGNC Symbol;Acc:697]	-0.659967	8.80029	135.073	3.18183e-31	8.59849e-30
ENSG00000092621	PHGDH	phosphoglycerate dehydrogenase [Source:HGNC Symbol;Acc:8923]	0.933293	7.63782	134.65	3.93902e-31	1.06253e-29
ENSG00000129646	QRICH2	glutamine rich 2 [Source:HGNC Symbol;Acc:25326]	1.67947	3.3368	134.572	4.09514e-31	1.10263e-29
ENSG00000135414	GDF11	growth differentiation factor 11 [Source:HGNC Symbol;Acc:4216]	1.21887	4.82129	134.5	4.24647e-31	1.14131e-29
ENSG00000170144	HNRNPA3	heterogeneous nuclear ribonucleoprotein A3 [Source:HGNC Symbol;Acc:24941]	-0.661927	9.73271	133.73	6.25894e-31	1.67914e-29
ENSG00000135048	TMEM2	transmembrane protein 2 [Source:HGNC Symbol;Acc:11869]	0.88928	6.22534	133.451	7.20219e-31	1.9287e-29
ENSG00000058673	ZC3H11A	zinc finger CCCH-type containing 11A [Source:HGNC Symbol;Acc:29093]	0.643297	8.75797	133.415	7.33463e-31	1.96062e-29
ENSG00000075790	BCAP29	B-cell receptor-associated protein 29 [Source:HGNC Symbol;Acc:24131]	-1.04502	5.71484	133.302	7.76692e-31	2.07244e-29
ENSG00000145247	OCIAD2	OCIA domain containing 2 [Source:HGNC Symbol;Acc:28685]	0.865715	6.12581	132.98	9.13265e-31	2.43247e-29
ENSG00000070495	JMJD6	jumonji domain containing 6 [Source:HGNC Symbol;Acc:19355]	1.04108	6.28095	132.938	9.32778e-31	2.47998e-29
ENSG00000163808	KIF15	kinesin family member 15 [Source:HGNC Symbol;Acc:17273]	-0.740102	7.04568	132.866	9.67412e-31	2.56746e-29
ENSG00000116903	EXOC8	exocyst complex component 8 [Source:HGNC Symbol;Acc:24659]	0.910674	5.8343	132.81	9.94743e-31	2.63527e-29
ENSG00000105968	H2AFV	H2A histone family, member V [Source:HGNC Symbol;Acc:20664]	-0.757022	7.50979	132.7	1.05159e-30	2.78089e-29
ENSG00000080644	CHRNA3	cholinergic receptor, nicotinic, alpha 3 (neuronal) [Source:HGNC Symbol;Acc:1957]	-0.812062	7.53081	132.44	1.19851e-30	3.16376e-29
ENSG00000100503	NIN	ninein (GSK3B interacting protein) [Source:HGNC Symbol;Acc:14906]	-0.702396	7.30961	132.32	1.27343e-30	3.35554e-29
ENSG00000162521	RBBP4	retinoblastoma binding protein 4 [Source:HGNC Symbol;Acc:9887]	-0.661894	7.98872	132.292	1.29138e-30	3.39682e-29
ENSG00000204256	BRD2	bromodomain containing 2 [Source:HGNC Symbol;Acc:1103]	0.691432	8.4031	132.222	1.3381e-30	3.51345e-29
ENSG00000132383	RPA1	replication protein A1, 70kDa [Source:HGNC Symbol;Acc:10289]	-0.685097	7.93984	131.991	1.50319e-30	3.93996e-29
ENSG00000171791	BCL2	B-cell CLL/lymphoma 2 [Source:HGNC Symbol;Acc:990]	-1.02581	5.73185	131.815	1.64197e-30	4.29611e-29
ENSG00000152192	POU4F1	POU class 4 homeobox 1 [Source:HGNC Symbol;Acc:9218]	3.22764	1.26229	131.698	1.7421e-30	4.55004e-29
ENSG00000163412	EIF4E3	eukaryotic translation initiation factor 4E family member 3 [Source:HGNC Symbol;Acc:31837]	-1.01438	5.61713	131.421	2.00338e-30	5.22325e-29
ENSG00000152127	MGAT5	mannosyl (alpha-1,6-)-glycoprotein beta-1,6-N-acetyl-glucosaminyltransferase [Source:HGNC Symbol;Acc:7049]	0.791733	6.67911	131.405	2.0191e-30	5.25498e-29
ENSG00000141052	MYOCD	myocardin [Source:HGNC Symbol;Acc:16067]	3.25854	1.40936	131.295	2.13385e-30	5.5439e-29
ENSG00000133401	PDZD2	PDZ domain containing 2 [Source:HGNC Symbol;Acc:18486]	-2.3643	2.56946	130.868	2.64692e-30	6.86484e-29
ENSG00000198814	GK	glycerol kinase [Source:HGNC Symbol;Acc:4289]	-1.79581	3.37226	130.719	2.85274e-30	7.3857e-29
ENSG00000150394	CDH8	cadherin 8, type 2 [Source:HGNC Symbol;Acc:1767]	3.59531	1.1558	130.435	3.29155e-30	8.50692e-29
ENSG00000044459	CNTLN	centlein, centrosomal protein [Source:HGNC Symbol;Acc:23432]	-1.02025	5.47215	130.247	3.61915e-30	9.33727e-29
ENSG00000147251	DOCK11	dedicator of cytokinesis 11 [Source:HGNC Symbol;Acc:23483]	1.28172	4.6258	130.176	3.74947e-30	9.65668e-29
ENSG00000172731	LRRC20	leucine rich repeat containing 20 [Source:HGNC Symbol;Acc:23421]	-1.51146	4.05126	130.008	4.08194e-30	1.04947e-28
ENSG00000113716	HMGXB3	HMG box domain containing 3 [Source:HGNC Symbol;Acc:28982]	0.930637	6.30038	129.97	4.15965e-30	1.0676e-28
ENSG00000140350	ANP32A	acidic (leucine-rich) nuclear phosphoprotein 32 family, member A [Source:HGNC Symbol;Acc:13233]	-0.598287	9.05036	129.79	4.55507e-30	1.16706e-28
ENSG00000121211	MND1	meiotic nuclear divisions 1 homolog (S. cerevisiae) [Source:HGNC Symbol;Acc:24839]	-1.60081	4.12384	129.474	5.34058e-30	1.36595e-28
ENSG00000167840	ZNF232	zinc finger protein 232 [Source:HGNC Symbol;Acc:13026]	0.980913	5.60806	129.47	5.35316e-30	1.36681e-28
ENSG00000168672	FAM84B	family with sequence similarity 84, member B [Source:HGNC Symbol;Acc:24166]	1.70846	3.51259	129.423	5.48006e-30	1.3968e-28
ENSG00000075407	ZNF37A	zinc finger protein 37A [Source:HGNC Symbol;Acc:13102]	0.77612	7.07834	129.227	6.04944e-30	1.53928e-28
ENSG00000167996	FTH1	ferritin, heavy polypeptide 1 [Source:HGNC Symbol;Acc:3976]	1.05527	5.68025	129.174	6.21201e-30	1.57794e-28
ENSG00000237732	AC010980.2		1.99806	3.16453	129.114	6.40363e-30	1.62383e-28
ENSG00000198873	GRK5	G protein-coupled receptor kinase 5 [Source:HGNC Symbol;Acc:4544]	1.66316	3.96801	129.106	6.43068e-30	1.6279e-28
ENSG00000141556	TBCD	tubulin folding cofactor D [Source:HGNC Symbol;Acc:11581]	-0.821027	7.14409	128.95	6.95589e-30	1.75785e-28
ENSG00000165449	SLC16A9	solute carrier family 16, member 9 (monocarboxylic acid transporter 9) [Source:HGNC Symbol;Acc:23520]	-1.0815	5.37466	128.822	7.41651e-30	1.87106e-28
ENSG00000153048	CARHSP1	calcium regulated heat stable protein 1, 24kDa [Source:HGNC Symbol;Acc:17150]	-1.03056	5.4099	128.593	8.32449e-30	2.09655e-28
ENSG00000168918	INPP5D	inositol polyphosphate-5-phosphatase, 145kDa [Source:HGNC Symbol;Acc:6079]	2.31695	2.02074	128.496	8.74272e-30	2.19815e-28
ENSG00000136158	SPRY2	sprouty homolog 2 (Drosophila) [Source:HGNC Symbol;Acc:11270]	2.04868	2.47236	128.356	9.37895e-30	2.35412e-28
ENSG00000179094	PER1	period homolog 1 (Drosophila) [Source:HGNC Symbol;Acc:8845]	1.39384	4.83811	128.106	1.06424e-29	2.66672e-28
ENSG00000244165	P2RY11	purinergic receptor P2Y, G-protein coupled, 11 [Source:HGNC Symbol;Acc:8540]	1.92597	3.13902	128.086	1.07506e-29	2.68929e-28
ENSG00000073605	GSDMB	gasdermin B [Source:HGNC Symbol;Acc:23690]	2.20184	2.41048	128.067	1.0849e-29	2.70933e-28
ENSG00000101412	E2F1	E2F transcription factor 1 [Source:HGNC Symbol;Acc:3113]	-0.952385	6.04076	127.772	1.2592e-29	3.1393e-28
ENSG00000144554	FANCD2	Fanconi anemia, complementation group D2 [Source:HGNC Symbol;Acc:3585]	-0.807799	6.42989	127.765	1.26354e-29	3.14483e-28
ENSG00000128965	CHAC1	ChaC, cation transport regulator homolog 1 (E. coli) [Source:HGNC Symbol;Acc:28680]	2.20761	3.00971	127.678	1.32047e-29	3.281e-28
ENSG00000170855	TRIAP1	TP53 regulated inhibitor of apoptosis 1 [Source:HGNC Symbol;Acc:26937]	0.811981	6.79994	127.625	1.35615e-29	3.36403e-28
ENSG00000169057	MECP2	methyl CpG binding protein 2 (Rett syndrome) [Source:HGNC Symbol;Acc:6990]	0.77178	7.05075	127.518	1.43094e-29	3.54361e-28
ENSG00000165119	HNRNPK	heterogeneous nuclear ribonucleoprotein K [Source:HGNC Symbol;Acc:5044]	-0.57642	10.0357	126.896	1.95797e-29	4.84066e-28
ENSG00000187514	PTMA	prothymosin, alpha [Source:HGNC Symbol;Acc:9623]	-0.538877	10.8891	126.758	2.09898e-29	5.18062e-28
ENSG00000118160	SLC8A2	solute carrier family 8 (sodium/calcium exchanger), member 2 [Source:HGNC Symbol;Acc:11069]	3.31246	1.4973	126.218	2.75538e-29	6.78943e-28
ENSG00000182809	CRIP2	cysteine-rich protein 2 [Source:HGNC Symbol;Acc:2361]	1.79553	3.59707	126.108	2.91124e-29	7.16155e-28
ENSG00000251022	THAP9-AS1	THAP9 antisense RNA 1 [Source:HGNC Symbol;Acc:44172]	-0.810148	6.70605	126.025	3.03567e-29	7.45527e-28
ENSG00000115468	EFHD1	EF-hand domain family, member D1 [Source:HGNC Symbol;Acc:29556]	-1.98671	2.63303	125.54	3.87708e-29	9.5059e-28
ENSG00000197136	PCNXL3	pecanex-like 3 (Drosophila) [Source:HGNC Symbol;Acc:18760]	1.31968	5.5348	125.35	4.26725e-29	1.04452e-27
ENSG00000158966	CACHD1	cache domain containing 1 [Source:HGNC Symbol;Acc:29314]	0.718059	6.90795	125.345	4.27673e-29	1.04512e-27
ENSG00000164649	CDCA7L	cell division cycle associated 7-like [Source:HGNC Symbol;Acc:30777]	-1.30678	4.63702	125.174	4.66239e-29	1.13749e-27
ENSG00000073111	MCM2	minichromosome maintenance complex component 2 [Source:HGNC Symbol;Acc:6944]	-0.724079	7.77039	125.086	4.87445e-29	1.18727e-27
ENSG00000124067	SLC12A4	solute carrier family 12 (potassium/chloride transporters), member 4 [Source:HGNC Symbol;Acc:10913]	2.34772	2.09376	124.785	5.67123e-29	1.37907e-27
ENSG00000105136	ZNF419	zinc finger protein 419 [Source:HGNC Symbol;Acc:20648]	1.29599	4.23836	124.295	7.26018e-29	1.76256e-27
ENSG00000137770	CTDSPL2	CTD (carboxy-terminal domain, RNA polymerase II, polypeptide A) small phosphatase like 2 [Source:HGNC Symbol;Acc:26936]	-0.721652	7.75638	124.039	8.25863e-29	2.00167e-27
ENSG00000106415	GLCCI1	glucocorticoid induced transcript 1 [Source:HGNC Symbol;Acc:18713]	-0.948387	5.83109	123.914	8.79577e-29	2.12838e-27
ENSG00000168243	GNG4	guanine nucleotide binding protein (G protein), gamma 4 [Source:HGNC Symbol;Acc:4407]	-0.726403	6.89877	123.859	9.04308e-29	2.18465e-27
ENSG00000120837	NFYB	nuclear transcription factor Y, beta [Source:HGNC Symbol;Acc:7805]	-0.879113	6.38534	123.849	9.08827e-29	2.19199e-27
ENSG00000138685	FGF2	fibroblast growth factor 2 (basic) [Source:HGNC Symbol;Acc:3676]	1.13375	4.77396	123.721	9.6949e-29	2.3345e-27
ENSG00000139289	PHLDA1	pleckstrin homology-like domain, family A, member 1 [Source:HGNC Symbol;Acc:8933]	1.18318	5.01335	123.605	1.02779e-28	2.47087e-27
ENSG00000124098	FAM210B	family with sequence similarity 210, member B [Source:HGNC Symbol;Acc:16102]	-1.38854	4.06456	123.54	1.06241e-28	2.54996e-27
ENSG00000147862	NFIB	nuclear factor I/B [Source:HGNC Symbol;Acc:7785]	-0.687365	7.56117	123.421	1.12792e-28	2.70281e-27
ENSG00000135677	GNS	glucosamine (N-acetyl)-6-sulfatase [Source:HGNC Symbol;Acc:4422]	0.725605	7.04065	122.804	1.53904e-28	3.68202e-27
ENSG00000141519	CCDC40	coiled-coil domain containing 40 [Source:HGNC Symbol;Acc:26090]	1.65256	3.4383	122.755	1.5775e-28	3.76794e-27
ENSG00000151503	NCAPD3	non-SMC condensin II complex, subunit D3 [Source:HGNC Symbol;Acc:28952]	-0.781878	6.44373	122.68	1.6387e-28	3.90781e-27
ENSG00000249459	ZNF286B	zinc finger protein 286B [Source:HGNC Symbol;Acc:33241]	1.11864	4.93849	122.569	1.73305e-28	4.12618e-27
ENSG00000078053	AMPH	amphiphysin [Source:HGNC Symbol;Acc:471]	-1.0301	5.43972	122.56	1.74085e-28	4.13807e-27
ENSG00000170624	SGCD	sarcoglycan, delta (35kDa dystrophin-associated glycoprotein) [Source:HGNC Symbol;Acc:10807]	0.927961	5.64275	122.439	1.84992e-28	4.39029e-27
ENSG00000071553	ATP6AP1	ATPase, H+ transporting, lysosomal accessory protein 1 [Source:HGNC Symbol;Acc:868]	0.866484	6.19109	122.168	2.1212e-28	5.02605e-27
ENSG00000163507	KIAA1524	KIAA1524 [Source:HGNC Symbol;Acc:29302]	-0.788584	6.89216	121.963	2.35235e-28	5.56486e-27
ENSG00000085491	SLC25A24	solute carrier family 25 (mitochondrial carrier; phosphate carrier), member 24 [Source:HGNC Symbol;Acc:20662]	-0.793976	7.28178	121.785	2.57248e-28	6.07588e-27
ENSG00000150347	ARID5B	AT rich interactive domain 5B (MRF1-like) [Source:HGNC Symbol;Acc:17362]	2.7507	1.61055	121.672	2.72338e-28	6.42206e-27
ENSG00000164938	TP53INP1	tumor protein p53 inducible nuclear protein 1 [Source:HGNC Symbol;Acc:18022]	0.690792	7.22116	121.529	2.92668e-28	6.8905e-27
ENSG00000144959	NCEH1	neutral cholesterol ester hydrolase 1 [Source:HGNC Symbol;Acc:29260]	1.59278	3.48772	121.404	3.11788e-28	7.32901e-27
ENSG00000144642	RBMS3	RNA binding motif, single stranded interacting protein 3 [Source:HGNC Symbol;Acc:13427]	-0.889047	5.87222	121.345	3.2111e-28	7.53616e-27
ENSG00000087206	UIMC1	ubiquitin interaction motif containing 1 [Source:HGNC Symbol;Acc:30298]	0.857878	5.90744	121.17	3.50738e-28	8.21847e-27
ENSG00000058063	ATP11B	ATPase, class VI, type 11B [Source:HGNC Symbol;Acc:13553]	0.981961	5.99765	121.078	3.67425e-28	8.59589e-27
ENSG00000114450	GNB4	guanine nucleotide binding protein (G protein), beta polypeptide 4 [Source:HGNC Symbol;Acc:20731]	-0.878216	6.12573	121.056	3.71506e-28	8.67764e-27
ENSG00000131016	AKAP12	A kinase (PRKA) anchor protein 12 [Source:HGNC Symbol;Acc:370]	-0.579793	9.0357	120.965	3.88845e-28	9.06836e-27
ENSG00000182481	KPNA2	karyopherin alpha 2 (RAG cohort 1, importin alpha 1) [Source:HGNC Symbol;Acc:6395]	-0.576796	9.47419	120.676	4.50022e-28	1.04786e-26
ENSG00000143578	CREB3L4	cAMP responsive element binding protein 3-like 4 [Source:HGNC Symbol;Acc:18854]	-0.852962	6.00889	120.608	4.65531e-28	1.08227e-26
ENSG00000185068	GTF2H5	general transcription factor IIH, polypeptide 5 [Source:HGNC Symbol;Acc:21157]	-1.17033	5.12457	120.431	5.08971e-28	1.1814e-26
ENSG00000197872	FAM49A	family with sequence similarity 49, member A [Source:HGNC Symbol;Acc:25373]	2.02928	2.53467	120.324	5.37307e-28	1.24522e-26
ENSG00000135476	ESPL1	extra spindle pole bodies homolog 1 (S. cerevisiae) [Source:HGNC Symbol;Acc:16856]	-0.933505	6.22554	120.25	5.57793e-28	1.29068e-26
ENSG00000132680	KIAA0907	KIAA0907 [Source:HGNC Symbol;Acc:29145]	0.658021	8.74812	120.159	5.83745e-28	1.34862e-26
ENSG00000085662	AKR1B1	aldo-keto reductase family 1, member B1 (aldose reductase) [Source:HGNC Symbol;Acc:381]	-0.736352	7.00824	119.821	6.92487e-28	1.59736e-26
ENSG00000137193	PIM1	pim-1 oncogene [Source:HGNC Symbol;Acc:8986]	-2.37099	2.09526	119.7	7.35851e-28	1.69475e-26
ENSG00000177511	ST8SIA3	ST8 alpha-N-acetyl-neuraminide alpha-2,8-sialyltransferase 3 [Source:HGNC Symbol;Acc:14269]	0.788696	6.36715	119.626	7.63749e-28	1.75627e-26
ENSG00000160469	BRSK1	BR serine/threonine kinase 1 [Source:HGNC Symbol;Acc:18994]	1.32343	4.97461	119.556	7.9149e-28	1.81724e-26
ENSG00000197324	LRP10	low density lipoprotein receptor-related protein 10 [Source:HGNC Symbol;Acc:14553]	1.61955	3.31775	119.346	8.79521e-28	2.01623e-26
ENSG00000105663	MLL4	Histone-lysine N-methyltransferase MLL4 [Source:UniProtKB/Swiss-Prot;Acc:Q9UMN6]	1.2446	5.72582	119.283	9.07896e-28	2.07806e-26
ENSG00000213676	ATF6B	activating transcription factor 6 beta [Source:HGNC Symbol;Acc:2349]	-1.28811	5.05228	119.216	9.39254e-28	2.14651e-26
ENSG00000100285	NEFH	neurofilament, heavy polypeptide [Source:HGNC Symbol;Acc:7737]	2.47689	2.48063	119.004	1.04534e-27	2.38527e-26
ENSG00000164741	DLC1	deleted in liver cancer 1 [Source:HGNC Symbol;Acc:2897]	-0.643246	7.54633	118.98	1.058e-27	2.41045e-26
ENSG00000257315	ZBED6	zinc finger, BED-type containing 6 [Source:HGNC Symbol;Acc:33273]	0.999814	5.30183	118.968	1.0645e-27	2.42154e-26
ENSG00000165097	KDM1B	lysine (K)-specific demethylase 1B [Source:HGNC Symbol;Acc:21577]	-0.84555	5.97394	118.582	1.29321e-27	2.9373e-26
ENSG00000139269	INHBE	inhibin, beta E [Source:HGNC Symbol;Acc:24029]	1.55705	3.88957	118.448	1.38363e-27	3.13786e-26
ENSG00000148120	C9orf3	chromosome 9 open reading frame 3 [Source:HGNC Symbol;Acc:1361]	-1.03489	5.08899	118.345	1.45725e-27	3.29975e-26
ENSG00000182378	PLCXD1	phosphatidylinositol-specific phospholipase C, X domain containing 1 [Source:HGNC Symbol;Acc:23148]	1.03093	5.72095	118.06	1.68247e-27	3.80391e-26
ENSG00000153904	DDAH1	dimethylarginine dimethylaminohydrolase 1 [Source:HGNC Symbol;Acc:2715]	-0.894214	5.88141	118.022	1.7149e-27	3.87134e-26
ENSG00000180008	SOCS4	suppressor of cytokine signaling 4 [Source:HGNC Symbol;Acc:19392]	0.685015	7.66035	117.877	1.84442e-27	4.1574e-26
ENSG00000137726	FXYD6	FXYD domain containing ion transport regulator 6 [Source:HGNC Symbol;Acc:4030]	-1.11347	5.27099	117.874	1.84755e-27	4.15812e-26
ENSG00000196141	SPATS2L	spermatogenesis associated, serine-rich 2-like [Source:HGNC Symbol;Acc:24574]	-1.20659	4.60289	117.735	1.98125e-27	4.45225e-26
ENSG00000006071	ABCC8	ATP-binding cassette, sub-family C (CFTR/MRP), member 8 [Source:HGNC Symbol;Acc:59]	-1.6292	3.29913	117.723	1.99352e-27	4.47304e-26
ENSG00000161714	PLCD3	phospholipase C, delta 3 [Source:HGNC Symbol;Acc:9061]	1.39357	4.61782	117.713	2.00379e-27	4.48928e-26
ENSG00000089486	C16orf5	chromosome 16 open reading frame 5 [Source:HGNC Symbol;Acc:13234]	1.06294	5.45267	117.655	2.06313e-27	4.61524e-26
ENSG00000131791	PRKAB2	protein kinase, AMP-activated, beta 2 non-catalytic subunit [Source:HGNC Symbol;Acc:9379]	0.650673	7.53065	117.52	2.20818e-27	4.93226e-26
ENSG00000024526	DEPDC1	DEP domain containing 1 [Source:HGNC Symbol;Acc:22949]	-1.00652	6.30688	117.447	2.291e-27	5.10954e-26
ENSG00000134853	PDGFRA	platelet-derived growth factor receptor, alpha polypeptide [Source:HGNC Symbol;Acc:8803]	-1.05328	5.52119	117.341	2.41688e-27	5.38219e-26
ENSG00000114021	NIT2	nitrilase family, member 2 [Source:HGNC Symbol;Acc:29878]	-1.13482	5.02657	117.326	2.43592e-27	5.41645e-26
ENSG00000138758	SEPT11	septin 11 [Source:HGNC Symbol;Acc:25589]	-0.58549	8.99814	117.247	2.53475e-27	5.62775e-26
ENSG00000144596	GRIP2	glutamate receptor interacting protein 2 [Source:HGNC Symbol;Acc:23841]	2.39206	1.83776	117.185	2.61507e-27	5.79739e-26
ENSG00000155755	TMEM237	transmembrane protein 237 [Source:HGNC Symbol;Acc:14432]	-0.766398	6.9223	117.145	2.66819e-27	5.90631e-26
ENSG00000066279	ASPM	asp (abnormal spindle) homolog, microcephaly associated (Drosophila) [Source:HGNC Symbol;Acc:19048]	-0.633238	8.28352	117.045	2.80668e-27	6.2036e-26
ENSG00000225733	FGD5-AS1	FGD5 antisense RNA 1 [Source:HGNC Symbol;Acc:40410]	-0.652612	7.756	116.976	2.90593e-27	6.4134e-26
ENSG00000071127	WDR1	WD repeat domain 1 [Source:HGNC Symbol;Acc:12754]	0.792444	7.10677	116.952	2.94161e-27	6.4825e-26
ENSG00000106404	CLDN15	claudin 15 [Source:HGNC Symbol;Acc:2036]	1.98882	3.01068	116.931	2.97284e-27	6.54157e-26
ENSG00000113569	NUP155	nucleoporin 155kDa [Source:HGNC Symbol;Acc:8063]	-0.663167	7.57691	116.795	3.183e-27	6.99362e-26
ENSG00000012660	ELOVL5	ELOVL fatty acid elongase 5 [Source:HGNC Symbol;Acc:21308]	-0.643136	7.6238	116.596	3.51963e-27	7.7218e-26
ENSG00000136295	TTYH3	tweety homolog 3 (Drosophila) [Source:HGNC Symbol;Acc:22222]	1.00358	6.54204	116.565	3.57509e-27	7.83188e-26
ENSG00000160716	CHRNB2	cholinergic receptor, nicotinic, beta 2 (neuronal) [Source:HGNC Symbol;Acc:1962]	0.869079	6.60034	116.526	3.64497e-27	7.97316e-26
ENSG00000133019	CHRM3	cholinergic receptor, muscarinic 3 [Source:HGNC Symbol;Acc:1952]	3.06931	1.52777	116.467	3.75542e-27	8.20266e-26
ENSG00000154803	FLCN	folliculin [Source:HGNC Symbol;Acc:27310]	1.07738	5.12554	116.422	3.8419e-27	8.37918e-26
ENSG00000186687	LYRM7	Lyrm7 homolog (mouse) [Source:HGNC Symbol;Acc:28072]	-0.963312	5.74177	116.252	4.18643e-27	9.11719e-26
ENSG00000104889	RNASEH2A	ribonuclease H2, subunit A [Source:HGNC Symbol;Acc:18518]	-1.08739	5.44472	116.001	4.75078e-27	1.0331e-25
ENSG00000131471	AOC3	amine oxidase, copper containing 3 (vascular adhesion protein 1) [Source:HGNC Symbol;Acc:550]	4.05284	0.347398	115.343	6.61897e-27	1.43725e-25
ENSG00000143933	CALM2	calmodulin 2 (phosphorylase kinase, delta) [Source:HGNC Symbol;Acc:1445]	-0.629465	9.29229	115.303	6.75605e-27	1.46487e-25
ENSG00000010278	CD9	CD9 molecule [Source:HGNC Symbol;Acc:1709]	-1.97752	2.26818	115.174	7.20733e-27	1.56043e-25
ENSG00000143437	ARNT	aryl hydrocarbon receptor nuclear translocator [Source:HGNC Symbol;Acc:700]	-0.656723	7.51181	114.909	8.24076e-27	1.78157e-25
ENSG00000196376	SLC35F1	solute carrier family 35, member F1 [Source:HGNC Symbol;Acc:21483]	-1.09637	4.82638	114.883	8.34662e-27	1.80174e-25
ENSG00000099875	MKNK2	MAP kinase interacting serine/threonine kinase 2 [Source:HGNC Symbol;Acc:7111]	1.15125	5.49284	114.881	8.3584e-27	1.80174e-25
ENSG00000232274	BX571672.2		1.89692	2.54257	114.676	9.26504e-27	1.99427e-25
ENSG00000055208	TAB2	TGF-beta activated kinase 1/MAP3K7 binding protein 2 [Source:HGNC Symbol;Acc:17075]	0.653145	7.33705	114.637	9.44873e-27	2.03086e-25
ENSG00000119397	CNTRL	centriolin [Source:HGNC Symbol;Acc:1858]	-0.893287	5.82856	114.585	9.70274e-27	2.08243e-25
ENSG00000104936	DMPK	dystrophia myotonica-protein kinase [Source:HGNC Symbol;Acc:2933]	1.46267	4.77543	114.426	1.05093e-26	2.25227e-25
ENSG00000129245	FXR2	fragile X mental retardation, autosomal homolog 2 [Source:HGNC Symbol;Acc:4024]	0.793083	6.34322	114.294	1.12342e-26	2.40415e-25
ENSG00000171604	CXXC5	CXXC finger protein 5 [Source:HGNC Symbol;Acc:26943]	-1.47868	3.40969	113.575	1.6143e-26	3.44966e-25
ENSG00000179222	MAGED1	melanoma antigen family D, 1 [Source:HGNC Symbol;Acc:6813]	-0.716718	6.74115	113.493	1.68235e-26	3.5899e-25
ENSG00000154645	CHODL	chondrolectin [Source:HGNC Symbol;Acc:17807]	2.26929	2.4563	113.47	1.70267e-26	3.62803e-25
ENSG00000229833	PET100	PET100 homolog (S. cerevisiae) [Source:HGNC Symbol;Acc:40038]	-1.40156	4.33183	113.336	1.82117e-26	3.87495e-25
ENSG00000132326	PER2	period homolog 2 (Drosophila) [Source:HGNC Symbol;Acc:8846]	1.35679	4.07018	113.274	1.87943e-26	3.99319e-25
ENSG00000080345	RIF1	RAP1 interacting factor homolog (yeast) [Source:HGNC Symbol;Acc:23207]	-0.635301	7.70423	113.265	1.88753e-26	4.00465e-25
ENSG00000101463	SYNDIG1	synapse differentiation inducing 1 [Source:HGNC Symbol;Acc:15885]	-3.64767	0.772824	113.038	2.11655e-26	4.48411e-25
ENSG00000099901	RANBP1	RAN binding protein 1 [Source:HGNC Symbol;Acc:9847]	-0.639848	7.60286	113.024	2.13202e-26	4.51044e-25
ENSG00000166987	MBD6	methyl-CpG binding domain protein 6 [Source:HGNC Symbol;Acc:20445]	1.19952	4.91252	112.983	2.17674e-26	4.59849e-25
ENSG00000112667	C6orf108	chromosome 6 open reading frame 108 [Source:HGNC Symbol;Acc:21218]	-2.09325	3.14156	112.798	2.38932e-26	5.04038e-25
ENSG00000233016	SNHG7	small nucleolar RNA host gene 7 (non-protein coding) [Source:HGNC Symbol;Acc:28254]	1.00421	5.36028	112.49	2.79039e-26	5.87808e-25
ENSG00000090530	LEPREL1	leprecan-like 1 [Source:HGNC Symbol;Acc:19317]	2.37686	2.34461	112.206	3.22128e-26	6.77613e-25
ENSG00000137142	IGFBPL1	insulin-like growth factor binding protein-like 1 [Source:HGNC Symbol;Acc:20081]	-0.673653	7.23395	111.853	3.84718e-26	8.08125e-25
ENSG00000140332	TLE3	transducin-like enhancer of split 3 (E(sp1) homolog, Drosophila) [Source:HGNC Symbol;Acc:11839]	0.893721	6.19773	111.834	3.8857e-26	8.15062e-25
ENSG00000163964	PIGX	phosphatidylinositol glycan anchor biosynthesis, class X [Source:HGNC Symbol;Acc:26046]	-1.16981	4.73147	111.746	4.06225e-26	8.50889e-25
ENSG00000204842	ATXN2	ataxin 2 [Source:HGNC Symbol;Acc:10555]	0.879382	5.95872	111.72	4.11424e-26	8.60563e-25
ENSG00000105726	ATP13A1	ATPase type 13A1 [Source:HGNC Symbol;Acc:24215]	1.08285	5.74969	111.6	4.37249e-26	9.13288e-25
ENSG00000249859	PVT1	Pvt1 oncogene (non-protein coding) [Source:HGNC Symbol;Acc:9709]	1.41888	3.71321	111.569	4.44002e-26	9.26089e-25
ENSG00000115159	GPD2	glycerol-3-phosphate dehydrogenase 2 (mitochondrial) [Source:HGNC Symbol;Acc:4456]	-0.737132	6.74045	111.562	4.4565e-26	9.28219e-25
ENSG00000136824	SMC2	structural maintenance of chromosomes 2 [Source:HGNC Symbol;Acc:14011]	-0.6838	7.09353	111.413	4.80378e-26	9.99146e-25
ENSG00000132646	PCNA	proliferating cell nuclear antigen [Source:HGNC Symbol;Acc:8729]	-0.69954	8.40035	111.358	4.93838e-26	1.0257e-24
ENSG00000172466	ZNF24	zinc finger protein 24 [Source:HGNC Symbol;Acc:13032]	0.595799	8.3901	111.2	5.35017e-26	1.10967e-24
ENSG00000133739	LRRCC1	leucine rich repeat and coiled-coil centrosomal protein 1 [Source:HGNC Symbol;Acc:29373]	-1.40053	4.02396	111.1	5.625e-26	1.16504e-24
ENSG00000069275	NUCKS1	nuclear casein kinase and cyclin-dependent kinase substrate 1 [Source:HGNC Symbol;Acc:29923]	-0.594372	10.3422	110.98	5.97572e-26	1.23596e-24
ENSG00000196517	SLC6A9	solute carrier family 6 (neurotransmitter transporter, glycine), member 9 [Source:HGNC Symbol;Acc:11056]	2.2687	2.51668	110.78	6.61003e-26	1.36524e-24
ENSG00000120251	GRIA2	glutamate receptor, ionotropic, AMPA 2 [Source:HGNC Symbol;Acc:4572]	1.777	2.93824	110.73	6.78083e-26	1.39857e-24
ENSG00000134184	GSTM1	glutathione S-transferase mu 1 [Source:HGNC Symbol;Acc:4632]	-1.2292	4.32052	110.72	6.8145e-26	1.4017e-24
ENSG00000163673	DCLK3	doublecortin-like kinase 3 [Source:HGNC Symbol;Acc:19005]	-1.59128	3.14212	110.72	6.81492e-26	1.4017e-24
ENSG00000224818	RP11-134G8.8		2.1219	1.91793	110.262	8.58422e-26	1.76316e-24
ENSG00000117410	ATP6V0B	ATPase, H+ transporting, lysosomal 21kDa, V0 subunit b [Source:HGNC Symbol;Acc:861]	0.860866	6.34897	110.021	9.69422e-26	1.98839e-24
ENSG00000167315	ACAA2	acetyl-CoA acyltransferase 2 [Source:HGNC Symbol;Acc:83]	-0.739791	6.51057	109.994	9.82867e-26	2.01318e-24
ENSG00000186635	ARAP1	ArfGAP with RhoGAP domain, ankyrin repeat and PH domain 1 [Source:HGNC Symbol;Acc:16925]	1.1293	4.82041	109.909	1.02607e-25	2.09878e-24
ENSG00000077264	PAK3	p21 protein (Cdc42/Rac)-activated kinase 3 [Source:HGNC Symbol;Acc:8592]	1.49501	3.71483	109.829	1.06814e-25	2.18181e-24
ENSG00000080709	KCNN2	potassium intermediate/small conductance calcium-activated channel, subfamily N, member 2 [Source:HGNC Symbol;Acc:6291]	1.5102	3.48931	109.684	1.14908e-25	2.34389e-24
ENSG00000160714	UBE2Q1	ubiquitin-conjugating enzyme E2Q family member 1 [Source:HGNC Symbol;Acc:15698]	0.569464	8.61605	109.668	1.1584e-25	2.35965e-24
ENSG00000214106	AC093726.6	HCG1999107; Uncharacterized protein [Source:UniProtKB/TrEMBL;Acc:A8MW02]	2.10409	1.89311	109.321	1.38028e-25	2.80777e-24
ENSG00000118513	MYB	v-myb myeloblastosis viral oncogene homolog (avian) [Source:HGNC Symbol;Acc:7545]	-1.53621	3.55969	109.295	1.39843e-25	2.84078e-24
ENSG00000146676	PURB	purine-rich element binding protein B [Source:HGNC Symbol;Acc:9702]	0.661098	7.60499	109.263	1.42152e-25	2.88095e-24
ENSG00000214435	AS3MT	arsenic (+3 oxidation state) methyltransferase [Source:HGNC Symbol;Acc:17452]	-1.29916	4.23662	109.262	1.42209e-25	2.88095e-24
ENSG00000088305	DNMT3B	DNA (cytosine-5-)-methyltransferase 3 beta [Source:HGNC Symbol;Acc:2979]	-1.28428	4.07194	109.219	1.45296e-25	2.93947e-24
ENSG00000130844	ZNF331	zinc finger protein 331 [Source:HGNC Symbol;Acc:15489]	0.881372	5.6517	108.952	1.6628e-25	3.3594e-24
ENSG00000227051	C14orf132	chromosome 14 open reading frame 132 [Source:HGNC Symbol;Acc:20346]	-0.599632	8.53753	108.848	1.75183e-25	3.53445e-24
ENSG00000136237	RAPGEF5	Rap guanine nucleotide exchange factor (GEF) 5 [Source:HGNC Symbol;Acc:16862]	-0.875246	6.03196	108.816	1.78082e-25	3.58805e-24
ENSG00000105251	SHD	Src homology 2 domain containing transforming protein D [Source:HGNC Symbol;Acc:30633]	-0.946195	6.27063	108.707	1.88118e-25	3.78512e-24
ENSG00000196739	COL27A1	collagen, type XXVII, alpha 1 [Source:HGNC Symbol;Acc:22986]	1.8883	2.56329	108.678	1.90923e-25	3.83633e-24
ENSG00000153993	SEMA3D	sema domain, immunoglobulin domain (Ig), short basic domain, secreted, (semaphorin) 3D [Source:HGNC Symbol;Acc:10726]	2.58819	2.19068	108.583	2.00285e-25	4.01901e-24
ENSG00000176994	SMCR8	Smith-Magenis syndrome chromosome region, candidate 8 [Source:HGNC Symbol;Acc:17921]	1.02914	5.44509	108.521	2.06644e-25	4.14099e-24
ENSG00000072786	STK10	serine/threonine kinase 10 [Source:HGNC Symbol;Acc:11388]	1.40821	3.83678	108.477	2.11257e-25	4.22771e-24
ENSG00000127663	KDM4B	lysine (K)-specific demethylase 4B [Source:HGNC Symbol;Acc:29136]	1.04081	5.18941	108.403	2.19305e-25	4.38284e-24
ENSG00000138646	HERC5	HECT and RLD domain containing E3 ubiquitin protein ligase 5 [Source:HGNC Symbol;Acc:24368]	1.37848	3.75142	108.372	2.22839e-25	4.44747e-24
ENSG00000197283	SYNGAP1	synaptic Ras GTPase activating protein 1 [Source:HGNC Symbol;Acc:11497]	1.12781	5.5604	108.156	2.48387e-25	4.95068e-24
ENSG00000036549	ZZZ3	zinc finger, ZZ-type containing 3 [Source:HGNC Symbol;Acc:24523]	0.680317	7.38984	108.13	2.51733e-25	5.01064e-24
ENSG00000244879	GABPB1-AS1	GABPB1 antisense RNA 1 [Source:HGNC Symbol;Acc:44157]	0.941809	5.79768	108.004	2.68249e-25	5.33221e-24
ENSG00000136003	ISCU	iron-sulfur cluster scaffold homolog (E. coli) [Source:HGNC Symbol;Acc:29882]	0.745001	6.18885	107.596	3.2952e-25	6.54138e-24
ENSG00000181045	SLC26A11	solute carrier family 26, member 11 [Source:HGNC Symbol;Acc:14471]	1.33142	4.03207	107.37	3.6928e-25	7.32084e-24
ENSG00000104765	BNIP3L	BCL2/adenovirus E1B 19kDa interacting protein 3-like [Source:HGNC Symbol;Acc:1085]	-0.83328	6.30732	107.046	4.34916e-25	8.61053e-24
ENSG00000160741	CRTC2	CREB regulated transcription coactivator 2 [Source:HGNC Symbol;Acc:27301]	1.17287	5.73635	106.84	4.82664e-25	9.5431e-24
ENSG00000010322	NISCH	nischarin [Source:HGNC Symbol;Acc:18006]	0.835444	7.10985	106.674	5.24864e-25	1.03636e-23
ENSG00000087303	NID2	nidogen 2 (osteonidogen) [Source:HGNC Symbol;Acc:13389]	1.76488	2.49419	106.57	5.53048e-25	1.09056e-23
ENSG00000119547	ONECUT2	one cut homeobox 2 [Source:HGNC Symbol;Acc:8139]	0.676989	7.47887	106.305	6.32187e-25	1.24495e-23
ENSG00000113407	TARS	threonyl-tRNA synthetase [Source:HGNC Symbol;Acc:11572]	0.570301	8.46977	106.209	6.63671e-25	1.30522e-23
ENSG00000111731	KIAA0528	KIAA0528 [Source:HGNC Symbol;Acc:29062]	-0.798941	6.42415	106.144	6.85838e-25	1.34703e-23
ENSG00000178425	NT5DC1	5'-nucleotidase domain containing 1 [Source:HGNC Symbol;Acc:21556]	-1.14131	4.76597	106.115	6.95733e-25	1.36465e-23
ENSG00000149554	CHEK1	checkpoint kinase 1 [Source:HGNC Symbol;Acc:1925]	-0.914178	5.6446	105.965	7.50443e-25	1.47001e-23
ENSG00000111860	CEP85L	centrosomal protein 85kDa-like [Source:HGNC Symbol;Acc:21638]	0.920909	5.6684	105.883	7.82012e-25	1.52983e-23
ENSG00000145390	USP53	ubiquitin specific peptidase 53 [Source:HGNC Symbol;Acc:29255]	1.37606	3.63561	105.817	8.08699e-25	1.57995e-23
ENSG00000138180	CEP55	centrosomal protein 55kDa [Source:HGNC Symbol;Acc:1161]	-0.857271	6.21666	105.808	8.12184e-25	1.58467e-23
ENSG00000173714	WFIKKN2	WAP, follistatin/kazal, immunoglobulin, kunitz and netrin domain containing 2 [Source:HGNC Symbol;Acc:30916]	0.796684	6.8815	105.541	9.29329e-25	1.81085e-23
ENSG00000170779	CDCA4	cell division cycle associated 4 [Source:HGNC Symbol;Acc:14625]	-1.12509	4.7454	105.526	9.36488e-25	1.8224e-23
ENSG00000183960	KCNH8	potassium voltage-gated channel, subfamily H (eag-related), member 8 [Source:HGNC Symbol;Acc:18864]	1.40093	3.67794	105.448	9.73981e-25	1.89287e-23
ENSG00000141385	AFG3L2	AFG3 ATPase family gene 3-like 2 (S. cerevisiae) [Source:HGNC Symbol;Acc:315]	-0.698189	6.86829	105.31	1.04437e-24	2.02701e-23
ENSG00000166265	CYYR1	cysteine/tyrosine-rich 1 [Source:HGNC Symbol;Acc:16274]	-0.736064	6.77956	105.213	1.09714e-24	2.12664e-23
ENSG00000140577	CRTC3	CREB regulated transcription coactivator 3 [Source:HGNC Symbol;Acc:26148]	0.84121	5.78077	104.891	1.29045e-24	2.49808e-23
ENSG00000162430	SEPN1	selenoprotein N, 1 [Source:HGNC Symbol;Acc:15999]	-1.18243	4.71738	104.868	1.30568e-24	2.52425e-23
ENSG00000182628	SKA2	spindle and kinetochore associated complex subunit 2 [Source:HGNC Symbol;Acc:28006]	-0.67614	7.94174	104.809	1.34517e-24	2.59721e-23
ENSG00000087301	TXNDC16	thioredoxin domain containing 16 [Source:HGNC Symbol;Acc:19965]	-1.03513	4.92143	104.781	1.36377e-24	2.6297e-23
ENSG00000156925	ZIC3	Zic family member 3 [Source:HGNC Symbol;Acc:12874]	-0.668781	6.82472	104.512	1.56273e-24	3.00942e-23
ENSG00000204764	RANBP17	RAN binding protein 17 [Source:HGNC Symbol;Acc:14428]	-1.12877	4.50887	104.448	1.61401e-24	3.10415e-23
ENSG00000102316	MAGED2	melanoma antigen family D, 2 [Source:HGNC Symbol;Acc:16353]	0.728441	6.53642	104.431	1.62766e-24	3.12633e-23
ENSG00000174282	ZBTB4	zinc finger and BTB domain containing 4 [Source:HGNC Symbol;Acc:23847]	1.1608	4.35974	104.406	1.6483e-24	3.16188e-23
ENSG00000206077	ZDHHC11B	zinc finger, DHHC-type containing 11B [Source:HGNC Symbol;Acc:32962]	1.81119	2.42479	104.387	1.66383e-24	3.18755e-23
ENSG00000182324	KCNJ14	potassium inwardly-rectifying channel, subfamily J, member 14 [Source:HGNC Symbol;Acc:6260]	1.98038	2.48974	104.327	1.71531e-24	3.28191e-23
ENSG00000113522	RAD50	RAD50 homolog (S. cerevisiae) [Source:HGNC Symbol;Acc:9816]	0.629566	7.3654	104.218	1.81235e-24	3.46311e-23
ENSG00000102870	ZNF629	zinc finger protein 629 [Source:HGNC Symbol;Acc:29008]	0.78261	6.38657	104.174	1.85335e-24	3.53689e-23
ENSG00000224032	EPB41L4A-AS1	EPB41L4A antisense RNA 1 [Source:HGNC Symbol;Acc:30749]	1.08085	4.66395	104.083	1.93978e-24	3.69706e-23
ENSG00000104313	EYA1	eyes absent homolog 1 (Drosophila) [Source:HGNC Symbol;Acc:3519]	-0.590107	8.0063	103.956	2.06896e-24	3.93821e-23
ENSG00000112031	MTRF1L	mitochondrial translational release factor 1-like [Source:HGNC Symbol;Acc:21051]	0.777451	5.99765	103.865	2.16538e-24	4.11645e-23
ENSG00000101152	DNAJC5	DnaJ (Hsp40) homolog, subfamily C, member 5 [Source:HGNC Symbol;Acc:16235]	0.83586	6.13856	103.739	2.30857e-24	4.37835e-23
ENSG00000172458	IL17D	interleukin 17D [Source:HGNC Symbol;Acc:5984]	-1.84719	2.61725	103.738	2.30906e-24	4.37835e-23
ENSG00000139154	AEBP2	AE binding protein 2 [Source:HGNC Symbol;Acc:24051]	0.807318	5.91807	103.556	2.53179e-24	4.79453e-23
ENSG00000157625	TAB3	TGF-beta activated kinase 1/MAP3K7 binding protein 3 [Source:HGNC Symbol;Acc:30681]	0.919733	5.5714	103.538	2.55511e-24	4.83251e-23
ENSG00000135778	NTPCR	nucleoside-triphosphatase, cancer-related [Source:HGNC Symbol;Acc:28204]	0.851253	5.88178	103.509	2.59261e-24	4.89719e-23
ENSG00000152620	NADKD1	NAD kinase domain containing 1 [Source:HGNC Symbol;Acc:26404]	-1.14108	4.46926	103.379	2.76767e-24	5.22121e-23
ENSG00000102699	PARP4	poly (ADP-ribose) polymerase family, member 4 [Source:HGNC Symbol;Acc:271]	-0.70185	6.51198	103.191	3.0442e-24	5.73557e-23
ENSG00000186115	CYP4F2	cytochrome P450, family 4, subfamily F, polypeptide 2 [Source:HGNC Symbol;Acc:2645]	6.92108	-0.633086	103.14	3.12289e-24	5.87635e-23
ENSG00000085276	MECOM	MDS1 and EVI1 complex locus [Source:HGNC Symbol;Acc:3498]	2.54737	1.25032	103.072	3.23193e-24	6.07381e-23
ENSG00000107036	KIAA1432	KIAA1432 [Source:HGNC Symbol;Acc:17686]	0.727066	6.40086	102.966	3.41016e-24	6.40064e-23
ENSG00000104980	TIMM44	translocase of inner mitochondrial membrane 44 homolog (yeast) [Source:HGNC Symbol;Acc:17316]	0.996843	5.46321	102.87	3.57862e-24	6.70832e-23
ENSG00000106049	HIBADH	3-hydroxyisobutyrate dehydrogenase [Source:HGNC Symbol;Acc:4907]	-1.15412	4.4724	102.833	3.64628e-24	6.82651e-23
ENSG00000172380	GNG12	guanine nucleotide binding protein (G protein), gamma 12 [Source:HGNC Symbol;Acc:19663]	-0.641641	7.54832	102.76	3.7826e-24	7.0728e-23
ENSG00000183527	PSMG1	proteasome (prosome, macropain) assembly chaperone 1 [Source:HGNC Symbol;Acc:3043]	-0.900569	6.12294	102.672	3.95434e-24	7.38459e-23
ENSG00000142731	PLK4	polo-like kinase 4 [Source:HGNC Symbol;Acc:11397]	-0.804516	6.29588	102.614	4.07178e-24	7.59434e-23
ENSG00000175197	DDIT3	DNA-damage-inducible transcript 3 [Source:HGNC Symbol;Acc:2726]	1.48825	3.20606	102.455	4.41256e-24	8.21957e-23
ENSG00000120149	MSX2	msh homeobox 2 [Source:HGNC Symbol;Acc:7392]	2.04716	3.10906	102.39	4.56091e-24	8.48525e-23
ENSG00000023697	DERA	deoxyribose-phosphate aldolase (putative) [Source:HGNC Symbol;Acc:24269]	-1.11189	4.45466	102.381	4.58045e-24	8.51091e-23
ENSG00000180304	OAZ2	ornithine decarboxylase antizyme 2 [Source:HGNC Symbol;Acc:8096]	0.691011	6.57159	102.253	4.88585e-24	9.06698e-23
ENSG00000105372	RPS19	ribosomal protein S19 [Source:HGNC Symbol;Acc:10402]	0.70816	9.01666	102.225	4.95538e-24	9.1845e-23
ENSG00000165699	TSC1	tuberous sclerosis 1 [Source:HGNC Symbol;Acc:12362]	0.717988	6.45855	102.119	5.22922e-24	9.67994e-23
ENSG00000117013	KCNQ4	potassium voltage-gated channel, KQT-like subfamily, member 4 [Source:HGNC Symbol;Acc:6298]	2.74998	0.98794	102.026	5.47963e-24	1.01308e-22
ENSG00000011426	ANLN	anillin, actin binding protein [Source:HGNC Symbol;Acc:14082]	-0.696286	7.01765	101.901	5.83621e-24	1.07766e-22
ENSG00000162669	HFM1	HFM1, ATP-dependent DNA helicase homolog (S. cerevisiae) [Source:HGNC Symbol;Acc:20193]	-1.69194	3.19059	101.893	5.85939e-24	1.08059e-22
ENSG00000117707	PROX1	prospero homeobox 1 [Source:HGNC Symbol;Acc:9459]	0.707941	6.59445	101.864	5.94606e-24	1.09521e-22
ENSG00000204580	DDR1	discoidin domain receptor tyrosine kinase 1 [Source:HGNC Symbol;Acc:2730]	1.09096	5.25241	101.857	5.96782e-24	1.09786e-22
ENSG00000124201	ZNFX1	zinc finger, NFX1-type containing 1 [Source:HGNC Symbol;Acc:29271]	0.88637	5.44254	101.848	5.99471e-24	1.10143e-22
ENSG00000101639	CEP192	centrosomal protein 192kDa [Source:HGNC Symbol;Acc:25515]	-0.747462	6.47109	101.835	6.03467e-24	1.1074e-22
ENSG00000176208	ATAD5	ATPase family, AAA domain containing 5 [Source:HGNC Symbol;Acc:25752]	-0.785553	6.12728	101.825	6.06374e-24	1.11136e-22
ENSG00000165406	MARCH8	membrane-associated ring finger (C3HC4) 8, E3 ubiquitin protein ligase [Source:HGNC Symbol;Acc:23356]	0.85848	5.48521	101.786	6.18422e-24	1.13204e-22
ENSG00000111875	ASF1A	ASF1 anti-silencing function 1 homolog A (S. cerevisiae) [Source:HGNC Symbol;Acc:20995]	-0.715609	6.70305	101.676	6.53811e-24	1.19534e-22
ENSG00000106399	RPA3	replication protein A3, 14kDa [Source:HGNC Symbol;Acc:10291]	-1.01945	4.96413	101.565	6.91653e-24	1.26297e-22
ENSG00000161800	RACGAP1	Rac GTPase activating protein 1 [Source:HGNC Symbol;Acc:9804]	-0.655898	7.01095	101.356	7.6848e-24	1.40153e-22
ENSG00000188985	DHFRP1	dihydrofolate reductase pseudogene 1 [Source:HGNC Symbol;Acc:2862]	-1.87496	3.71827	101.333	7.77356e-24	1.41597e-22
ENSG00000042429	MED17	mediator complex subunit 17 [Source:HGNC Symbol;Acc:2375]	0.661978	6.99233	101.203	8.301e-24	1.51019e-22
ENSG00000075785	RAB7A	RAB7A, member RAS oncogene family [Source:HGNC Symbol;Acc:9788]	0.582773	7.74983	101.18	8.39858e-24	1.52607e-22
ENSG00000108528	SLC25A11	solute carrier family 25 (mitochondrial carrier; oxoglutarate carrier), member 11 [Source:HGNC Symbol;Acc:10981]	-1.12378	4.87664	101.115	8.67796e-24	1.5749e-22
ENSG00000109572	CLCN3	chloride channel, voltage-sensitive 3 [Source:HGNC Symbol;Acc:2021]	0.65013	7.10044	100.901	9.6675e-24	1.75234e-22
ENSG00000137831	UACA	uveal autoantigen with coiled-coil domains and ankyrin repeats [Source:HGNC Symbol;Acc:15947]	-1.20838	4.74041	100.713	1.06348e-23	1.92531e-22
ENSG00000100281	HMGXB4	HMG box domain containing 4 [Source:HGNC Symbol;Acc:5003]	-0.908149	6.07394	100.69	1.07571e-23	1.94508e-22
ENSG00000116260	QSOX1	quiescin Q6 sulfhydryl oxidase 1 [Source:HGNC Symbol;Acc:9756]	0.927244	5.64709	100.645	1.10051e-23	1.9875e-22
ENSG00000074410	CA12	carbonic anhydrase XII [Source:HGNC Symbol;Acc:1371]	-1.28718	4.31159	100.56	1.14851e-23	2.07166e-22
ENSG00000226754	RP5-1024G6.5		-2.01884	2.32927	100.515	1.17477e-23	2.11644e-22
ENSG00000083290	ULK2	unc-51-like kinase 2 (C. elegans) [Source:HGNC Symbol;Acc:13480]	-0.944774	5.25237	100.459	1.20859e-23	2.17473e-22
ENSG00000119403	PHF19	PHD finger protein 19 [Source:HGNC Symbol;Acc:24566]	-0.989058	5.1924	100.43	1.22659e-23	2.20444e-22
ENSG00000183718	TRIM52	tripartite motif containing 52 [Source:HGNC Symbol;Acc:19024]	1.01569	4.75828	100.304	1.30713e-23	2.3447e-22
ENSG00000143162	CREG1	cellular repressor of E1A-stimulated genes 1 [Source:HGNC Symbol;Acc:2351]	-1.17507	4.64951	100.303	1.3078e-23	2.3447e-22
ENSG00000160014	CALM3	calmodulin 3 (phosphorylase kinase, delta) [Source:HGNC Symbol;Acc:1449]	-0.677067	7.65158	100.136	1.42318e-23	2.54847e-22
ENSG00000198853	RUSC2	RUN and SH3 domain containing 2 [Source:HGNC Symbol;Acc:23625]	1.30911	4.27695	100.036	1.49655e-23	2.67662e-22
ENSG00000157110	RBPMS	RNA binding protein with multiple splicing [Source:HGNC Symbol;Acc:19097]	0.862834	5.43587	99.9486	1.56406e-23	2.79399e-22
ENSG00000050344	NFE2L3	nuclear factor (erythroid-derived 2)-like 3 [Source:HGNC Symbol;Acc:7783]	1.13517	4.40025	99.8945	1.60735e-23	2.86786e-22
ENSG00000102054	RBBP7	retinoblastoma binding protein 7 [Source:HGNC Symbol;Acc:9890]	-0.618962	7.44586	99.719	1.75627e-23	3.1298e-22
ENSG00000164687	FABP5	fatty acid binding protein 5 (psoriasis-associated) [Source:HGNC Symbol;Acc:3560]	-0.887973	5.60432	99.7043	1.76939e-23	3.14939e-22
ENSG00000137496	IL18BP	interleukin 18 binding protein [Source:HGNC Symbol;Acc:5987]	1.5074	3.47327	99.5965	1.86838e-23	3.32159e-22
ENSG00000164930	FZD6	frizzled family receptor 6 [Source:HGNC Symbol;Acc:4044]	1.95223	1.94125	99.4807	1.9808e-23	3.51722e-22
ENSG00000156931	VPS8	vacuolar protein sorting 8 homolog (S. cerevisiae) [Source:HGNC Symbol;Acc:29122]	0.726471	6.36871	99.2942	2.17641e-23	3.85994e-22
ENSG00000149212	SESN3	sestrin 3 [Source:HGNC Symbol;Acc:23060]	0.753085	6.95917	99.2441	2.23219e-23	3.95412e-22
ENSG00000111581	NUP107	nucleoporin 107kDa [Source:HGNC Symbol;Acc:29914]	-0.642037	7.69938	99.2029	2.27909e-23	4.03238e-22
ENSG00000181827	RFX7	regulatory factor X, 7 [Source:HGNC Symbol;Acc:25777]	0.569052	7.95287	99.1912	2.29265e-23	4.05153e-22
ENSG00000215908	CROCCP2	ciliary rootlet coiled-coil, rootletin pseudogene 2 [Source:HGNC Symbol;Acc:28170]	1.0318	4.69709	99.1836	2.30141e-23	4.06217e-22
ENSG00000179361	ARID3B	AT rich interactive domain 3B (BRIGHT-like) [Source:HGNC Symbol;Acc:14350]	1.02333	5.13737	99.1012	2.39917e-23	4.22968e-22
ENSG00000124222	STX16	syntaxin 16 [Source:HGNC Symbol;Acc:11431]	0.70477	6.6364	99.0314	2.48525e-23	4.37623e-22
ENSG00000172493	AFF1	AF4/FMR2 family, member 1 [Source:HGNC Symbol;Acc:7135]	0.74334	6.13437	98.765	2.84308e-23	5.00038e-22
ENSG00000120254	MTHFD1L	methylenetetrahydrofolate dehydrogenase (NADP+ dependent) 1-like [Source:HGNC Symbol;Acc:21055]	0.677411	6.77232	98.7545	2.8583e-23	5.02118e-22
ENSG00000183688	FAM101B	family with sequence similarity 101, member B [Source:HGNC Symbol;Acc:28705]	-1.35615	3.97999	98.7008	2.93681e-23	5.15299e-22
ENSG00000164754	RAD21	RAD21 homolog (S. pombe) [Source:HGNC Symbol;Acc:9811]	-0.558115	8.89096	98.6439	3.02248e-23	5.29703e-22
ENSG00000169118	CSNK1G1	casein kinase 1, gamma 1 [Source:HGNC Symbol;Acc:2454]	0.662146	6.69599	98.6305	3.04299e-23	5.32667e-22
ENSG00000136783	NIPSNAP3A	nipsnap homolog 3A (C. elegans) [Source:HGNC Symbol;Acc:23619]	-1.06416	4.76625	98.4362	3.35674e-23	5.86895e-22
ENSG00000163041	H3F3A	H3 histone, family 3A [Source:HGNC Symbol;Acc:4764]	-0.578633	7.89059	98.4236	3.37802e-23	5.89919e-22
ENSG00000130227	XPO7	exportin 7 [Source:HGNC Symbol;Acc:14108]	-0.591135	7.76358	98.1441	3.89026e-23	6.78573e-22
ENSG00000197070	ARRDC1	arrestin domain containing 1 [Source:HGNC Symbol;Acc:28633]	1.43604	3.62054	98.0977	3.98236e-23	6.9382e-22
ENSG00000179362	HMGN2P46	high mobility group nucleosomal binding domain 2 pseudogene 46 [Source:HGNC Symbol;Acc:26817]	-1.38709	3.67609	98.0226	4.13633e-23	7.198e-22
ENSG00000156504	FAM122B	family with sequence similarity 122B [Source:HGNC Symbol;Acc:30490]	-0.874723	5.82716	97.9693	4.24912e-23	7.3856e-22
ENSG00000125447	GGA3	golgi-associated, gamma adaptin ear containing, ARF binding protein 3 [Source:HGNC Symbol;Acc:17079]	0.768319	6.28171	97.7076	4.84955e-23	8.41934e-22
ENSG00000168769	TET2	tet methylcytosine dioxygenase 2 [Source:HGNC Symbol;Acc:25941]	0.673391	6.53671	97.6982	4.87265e-23	8.44955e-22
ENSG00000197472	ZNF695	zinc finger protein 695 [Source:HGNC Symbol;Acc:30954]	-1.17118	4.40269	97.5877	5.1524e-23	8.9242e-22
ENSG00000079819	EPB41L2	erythrocyte membrane protein band 4.1-like 2 [Source:HGNC Symbol;Acc:3379]	-0.63904	6.97531	97.403	5.65592e-23	9.78488e-22
ENSG00000260124	RP4-791K14.2		1.929	1.94571	97.3964	5.6749e-23	9.80625e-22
ENSG00000155256	ZFYVE27	zinc finger, FYVE domain containing 27 [Source:HGNC Symbol;Acc:26559]	1.16779	4.85576	97.3627	5.77221e-23	9.96279e-22
ENSG00000079156	OSBPL6	oxysterol binding protein-like 6 [Source:HGNC Symbol;Acc:16388]	-1.16041	4.38817	97.285	6.00321e-23	1.03494e-21
ENSG00000137502	RAB30	RAB30, member RAS oncogene family [Source:HGNC Symbol;Acc:9770]	-0.59092	7.4613	97.2641	6.06705e-23	1.04473e-21
ENSG00000163596	ICA1L	islet cell autoantigen 1,69kDa-like [Source:HGNC Symbol;Acc:14442]	-1.80539	2.51726	97.2021	6.26e-23	1.07671e-21
ENSG00000143393	PI4KB	phosphatidylinositol 4-kinase, catalytic, beta [Source:HGNC Symbol;Acc:8984]	0.620253	7.52091	97.1589	6.39806e-23	1.09918e-21
ENSG00000119707	RBM25	RNA binding motif protein 25 [Source:HGNC Symbol;Acc:23244]	0.555898	8.76676	96.9825	6.99435e-23	1.20022e-21
ENSG00000185619	PCGF3	polycomb group ring finger 3 [Source:HGNC Symbol;Acc:10066]	0.624878	7.09066	96.9658	7.05346e-23	1.20897e-21
ENSG00000075213	SEMA3A	sema domain, immunoglobulin domain (Ig), short basic domain, secreted, (semaphorin) 3A [Source:HGNC Symbol;Acc:10723]	1.86315	2.9442	96.9346	7.16555e-23	1.22676e-21
ENSG00000108786	HSD17B1	hydroxysteroid (17-beta) dehydrogenase 1 [Source:HGNC Symbol;Acc:5210]	1.18345	4.53807	96.9137	7.2417e-23	1.23836e-21
ENSG00000132386	SERPINF1	serpin peptidase inhibitor, clade F (alpha-2 antiplasmin, pigment epithelium derived factor), member 1 [Source:HGNC Symbol;Acc:8824]	0.761474	6.7762	96.9094	7.2572e-23	1.23958e-21
ENSG00000186364	NUDT17	nudix (nucleoside diphosphate linked moiety X)-type motif 17 [Source:HGNC Symbol;Acc:26618]	1.33369	4.18578	96.8932	7.31689e-23	1.24834e-21
ENSG00000145335	SNCA	synuclein, alpha (non A4 component of amyloid precursor) [Source:HGNC Symbol;Acc:11138]	1.63372	3.35808	96.8334	7.54113e-23	1.28512e-21
ENSG00000165462	PHOX2A	paired-like homeobox 2a [Source:HGNC Symbol;Acc:691]	-0.957313	6.06193	96.7796	7.74888e-23	1.319e-21
ENSG00000143217	PVRL4	poliovirus receptor-related 4 [Source:HGNC Symbol;Acc:19688]	3.33295	0.531073	96.7644	7.80889e-23	1.32769e-21
ENSG00000079246	XRCC5	X-ray repair complementing defective repair in Chinese hamster cells 5 (double-strand-break rejoining) [Source:HGNC Symbol;Acc:12833]	-0.513644	9.77704	96.708	8.03428e-23	1.36445e-21
ENSG00000138411	HECW2	HECT, C2 and WW domain containing E3 ubiquitin protein ligase 2 [Source:HGNC Symbol;Acc:29853]	-1.37727	3.49273	96.5644	8.63869e-23	1.46541e-21
ENSG00000243927	MRPS6	mitochondrial ribosomal protein S6 [Source:HGNC Symbol;Acc:14051]	-0.88953	5.33415	96.4523	9.14208e-23	1.54903e-21
ENSG00000091656	ZFHX4	zinc finger homeobox 4 [Source:HGNC Symbol;Acc:30939]	0.716371	6.51221	96.4114	9.33294e-23	1.57956e-21
ENSG00000128045	RASL11B	RAS-like, family 11, member B [Source:HGNC Symbol;Acc:23804]	-0.910803	5.37906	96.2802	9.9722e-23	1.68583e-21
ENSG00000084072	PPIE	peptidylprolyl isomerase E (cyclophilin E) [Source:HGNC Symbol;Acc:9258]	0.845387	5.5301	95.9969	1.15063e-22	1.94295e-21
ENSG00000178184	PARD6G	par-6 partitioning defective 6 homolog gamma (C. elegans) [Source:HGNC Symbol;Acc:16076]	0.977074	4.83494	95.9338	1.18791e-22	2.00361e-21
ENSG00000117632	STMN1	stathmin 1 [Source:HGNC Symbol;Acc:6510]	-0.550653	10.5046	95.8477	1.24069e-22	2.09026e-21
ENSG00000213760	ATP6V1G2	ATPase, H+ transporting, lysosomal 13kDa, V1 subunit G2 [Source:HGNC Symbol;Acc:862]	-1.86574	2.21106	95.5642	1.43172e-22	2.40936e-21
ENSG00000157456	CCNB2	cyclin B2 [Source:HGNC Symbol;Acc:1580]	-0.678879	6.7972	95.5515	1.44092e-22	2.42209e-21
ENSG00000157570	TSPAN18	tetraspanin 18 [Source:HGNC Symbol;Acc:20660]	-0.909666	5.76164	95.4959	1.48199e-22	2.48829e-21
ENSG00000134690	CDCA8	cell division cycle associated 8 [Source:HGNC Symbol;Acc:14629]	-0.735363	6.38164	95.2797	1.65303e-22	2.77233e-21
ENSG00000171241	SHCBP1	SHC SH2-domain binding protein 1 [Source:HGNC Symbol;Acc:29547]	-0.864817	5.78324	95.2712	1.66007e-22	2.781e-21
ENSG00000124788	ATXN1	ataxin 1 [Source:HGNC Symbol;Acc:10548]	0.98138	4.90466	95.2595	1.66994e-22	2.79436e-21
ENSG00000198951	NAGA	N-acetylgalactosaminidase, alpha- [Source:HGNC Symbol;Acc:7631]	-1.31698	3.91041	95.1747	1.74305e-22	2.91342e-21
ENSG00000171877	FRMD5	FERM domain containing 5 [Source:HGNC Symbol;Acc:28214]	1.21193	3.98207	95.1192	1.7926e-22	2.99286e-21
ENSG00000124151	NCOA3	nuclear receptor coactivator 3 [Source:HGNC Symbol;Acc:7670]	0.729656	6.04695	94.9778	1.92532e-22	3.21082e-21
ENSG00000066135	KDM4A	lysine (K)-specific demethylase 4A [Source:HGNC Symbol;Acc:22978]	0.692631	6.9177	94.8547	2.04883e-22	3.41295e-21
ENSG00000005469	CROT	carnitine O-octanoyltransferase [Source:HGNC Symbol;Acc:2366]	1.00563	4.80069	94.7701	2.13826e-22	3.55793e-21
ENSG00000260948	RP11-552M11.8		1.93384	2.34344	94.7202	2.19291e-22	3.64476e-21
ENSG00000140553	UNC45A	unc-45 homolog A (C. elegans) [Source:HGNC Symbol;Acc:30594]	0.871947	6.08237	94.625	2.30098e-22	3.82009e-21
ENSG00000182903	ZNF721	zinc finger protein 721 [Source:HGNC Symbol;Acc:29425]	0.753312	6.00174	94.5538	2.38523e-22	3.95553e-21
ENSG00000130226	DPP6	dipeptidyl-peptidase 6 [Source:HGNC Symbol;Acc:3010]	-1.4503	3.65483	94.5497	2.3901e-22	3.95917e-21
ENSG00000111276	CDKN1B	cyclin-dependent kinase inhibitor 1B (p27, Kip1) [Source:HGNC Symbol;Acc:1785]	-0.689578	6.33268	94.3939	2.58587e-22	4.27867e-21
ENSG00000131389	SLC6A6	solute carrier family 6 (neurotransmitter transporter, taurine), member 6 [Source:HGNC Symbol;Acc:11052]	0.895631	5.61844	94.269	2.7543e-22	4.55227e-21
ENSG00000114648	KLHL18	kelch-like 18 (Drosophila) [Source:HGNC Symbol;Acc:29120]	0.876507	5.27772	94.0853	3.02215e-22	4.98941e-21
ENSG00000107625	DDX50	DEAD (Asp-Glu-Ala-Asp) box polypeptide 50 [Source:HGNC Symbol;Acc:17906]	-0.696188	6.58402	94.0736	3.04012e-22	5.01349e-21
ENSG00000094916	CBX5	chromobox homolog 5 [Source:HGNC Symbol;Acc:1555]	-0.506866	9.52531	94.0509	3.07516e-22	5.06563e-21
ENSG00000187079	TEAD1	TEA domain family member 1 (SV40 transcriptional enhancer factor) [Source:HGNC Symbol;Acc:11714]	-0.542862	8.30715	93.9817	3.18461e-22	5.24009e-21
ENSG00000185518	SV2B	synaptic vesicle glycoprotein 2B [Source:HGNC Symbol;Acc:16874]	2.02001	1.98987	93.9757	3.19422e-22	5.24628e-21
ENSG00000107262	BAG1	BCL2-associated athanogene [Source:HGNC Symbol;Acc:937]	-0.760186	5.939	93.974	3.19696e-22	5.24628e-21
ENSG00000184863	RBM33	RNA binding motif protein 33 [Source:HGNC Symbol;Acc:27223]	0.683917	6.85604	93.9727	3.19899e-22	5.24628e-21
ENSG00000189060	H1F0	H1 histone family, member 0 [Source:HGNC Symbol;Acc:4714]	0.519335	9.70408	93.9271	3.27365e-22	5.36277e-21
ENSG00000089053	ANAPC5	anaphase promoting complex subunit 5 [Source:HGNC Symbol;Acc:15713]	-0.595694	7.29666	93.8648	3.37834e-22	5.52816e-21
ENSG00000198113	TOR4A	torsin family 4, member A [Source:HGNC Symbol;Acc:25981]	2.64588	1.25796	93.7083	3.65628e-22	5.97636e-21
ENSG00000141582	CBX4	chromobox homolog 4 [Source:HGNC Symbol;Acc:1554]	1.22174	4.58926	93.657	3.75223e-22	6.12643e-21
ENSG00000250033	SLC7A11-AS1	SLC7A11 antisense RNA 1 [Source:HGNC Symbol;Acc:44064]	3.62048	0.399083	93.5789	3.90334e-22	6.36613e-21
ENSG00000159840	ZYX	zyxin [Source:HGNC Symbol;Acc:13200]	1.20107	5.14068	93.4783	4.10685e-22	6.69069e-21
ENSG00000117069	ST6GALNAC5	ST6 (alpha-N-acetyl-neuraminyl-2,3-beta-galactosyl-1,3)-N-acetylgalactosaminide alpha-2,6-sialyltransferase 5 [Source:HGNC Symbol;Acc:19342]	-0.837368	5.46824	93.4114	4.24803e-22	6.91308e-21
ENSG00000254004	ZNF260	zinc finger protein 260 [Source:HGNC Symbol;Acc:13499]	0.676456	7.275	92.9662	5.31942e-22	8.64713e-21
ENSG00000175592	FOSL1	FOS-like antigen 1 [Source:HGNC Symbol;Acc:13718]	5.18444	-0.327703	92.9433	5.38143e-22	8.73834e-21
ENSG00000160785	SLC25A44	solute carrier family 25, member 44 [Source:HGNC Symbol;Acc:29036]	0.657202	7.47086	92.9266	5.42702e-22	8.8027e-21
ENSG00000135249	RINT1	RAD50 interactor 1 [Source:HGNC Symbol;Acc:21876]	0.869027	5.29262	92.7199	6.02441e-22	9.75052e-21
ENSG00000147050	KDM6A	lysine (K)-specific demethylase 6A [Source:HGNC Symbol;Acc:12637]	0.916459	5.41098	92.7199	6.02453e-22	9.75052e-21
ENSG00000137310	TCF19	transcription factor 19 [Source:HGNC Symbol;Acc:11629]	-1.88414	2.39436	92.6515	6.23639e-22	1.00824e-20
ENSG00000137942	FNBP1L	formin binding protein 1-like [Source:HGNC Symbol;Acc:20851]	0.543651	8.44119	92.4527	6.89537e-22	1.11356e-20
ENSG00000143622	RIT1	Ras-like without CAAX 1 [Source:HGNC Symbol;Acc:10023]	0.648184	6.9574	92.3655	7.206e-22	1.16246e-20
ENSG00000146576	C7orf26	chromosome 7 open reading frame 26 [Source:HGNC Symbol;Acc:21702]	0.994149	5.01053	92.3587	7.23084e-22	1.1652e-20
ENSG00000139116	KIF21A	kinesin family member 21A [Source:HGNC Symbol;Acc:19349]	-0.534687	8.94972	92.1992	7.83775e-22	1.26162e-20
ENSG00000120256	LRP11	low density lipoprotein receptor-related protein 11 [Source:HGNC Symbol;Acc:16936]	-0.830408	5.74005	92.0978	8.24952e-22	1.32646e-20
ENSG00000120709	FAM53C	family with sequence similarity 53, member C [Source:HGNC Symbol;Acc:1336]	0.694192	6.61109	92.0768	8.3379e-22	1.33922e-20
ENSG00000150990	DHX37	DEAH (Asp-Glu-Ala-His) box polypeptide 37 [Source:HGNC Symbol;Acc:17210]	0.907759	5.62467	92.0248	8.55967e-22	1.37335e-20
ENSG00000111011	RSRC2	arginine/serine-rich coiled-coil 2 [Source:HGNC Symbol;Acc:30559]	0.575003	7.6392	91.987	8.72488e-22	1.39834e-20
ENSG00000073969	NSF	N-ethylmaleimide-sensitive factor [Source:HGNC Symbol;Acc:8016]	0.560257	7.78679	91.9705	8.798e-22	1.40854e-20
ENSG00000154511	FAM69A	family with sequence similarity 69, member A [Source:HGNC Symbol;Acc:32213]	-0.834827	5.90068	91.9673	8.81203e-22	1.40926e-20
ENSG00000136810	TXN	thioredoxin [Source:HGNC Symbol;Acc:12435]	-0.584757	7.92138	91.7755	9.70912e-22	1.55105e-20
ENSG00000130024	PHF10	PHD finger protein 10 [Source:HGNC Symbol;Acc:18250]	-0.568163	8.41457	91.6784	1.01972e-21	1.62726e-20
ENSG00000197355	UAP1L1	UDP-N-acteylglucosamine pyrophosphorylase 1-like 1 [Source:HGNC Symbol;Acc:28082]	1.30689	3.95603	91.592	1.06524e-21	1.69808e-20
ENSG00000115053	NCL	nucleolin [Source:HGNC Symbol;Acc:7667]	-0.450248	10.8608	91.5607	1.08219e-21	1.72325e-20
ENSG00000214022	REPIN1	replication initiator 1 [Source:HGNC Symbol;Acc:17922]	0.751784	6.40958	91.4914	1.12079e-21	1.78279e-20
ENSG00000126003	PLAGL2	pleiomorphic adenoma gene-like 2 [Source:HGNC Symbol;Acc:9047]	0.709873	6.3633	91.4617	1.13772e-21	1.80777e-20
ENSG00000197779	ZNF81	zinc finger protein 81 [Source:HGNC Symbol;Acc:13156]	0.936046	5.02559	91.3736	1.18951e-21	1.88805e-20
ENSG00000175414	ARL10	ADP-ribosylation factor-like 10 [Source:HGNC Symbol;Acc:22042]	0.612263	7.11856	91.3677	1.1931e-21	1.89171e-20
ENSG00000167964	RAB26	RAB26, member RAS oncogene family [Source:HGNC Symbol;Acc:14259]	-2.41151	1.40428	91.3617	1.19671e-21	1.89339e-20
ENSG00000163510	CWC22	CWC22 spliceosome-associated protein homolog (S. cerevisiae) [Source:HGNC Symbol;Acc:29322]	0.673662	6.41105	91.3617	1.19672e-21	1.89339e-20
ENSG00000130723	PRRC2B	proline-rich coiled-coil 2B [Source:HGNC Symbol;Acc:28121]	0.70984	8.575	91.336	1.21235e-21	1.91571e-20
ENSG00000074219	TEAD2	TEA domain family member 2 [Source:HGNC Symbol;Acc:11715]	-0.800707	6.02568	91.3343	1.21341e-21	1.91571e-20
ENSG00000172888	ZNF621	zinc finger protein 621 [Source:HGNC Symbol;Acc:24787]	0.690587	6.51523	91.29	1.24083e-21	1.95692e-20
ENSG00000136960	ENPP2	ectonucleotide pyrophosphatase/phosphodiesterase 2 [Source:HGNC Symbol;Acc:3357]	3.35326	0.314997	91.2867	1.24295e-21	1.95817e-20
ENSG00000187944	C2orf66	chromosome 2 open reading frame 66 [Source:HGNC Symbol;Acc:33809]	3.367	0.382437	91.2764	1.24945e-21	1.96632e-20
ENSG00000235823	LINC00263	long intergenic non-protein coding RNA 263 [Source:HGNC Symbol;Acc:28060]	1.63678	2.83328	91.2119	1.2908e-21	2.02724e-20
ENSG00000102908	NFAT5	nuclear factor of activated T-cells 5, tonicity-responsive [Source:HGNC Symbol;Acc:7774]	0.827756	5.99773	91.2118	1.2909e-21	2.02724e-20
ENSG00000184305	FAM190A	family with sequence similarity 190, member A [Source:HGNC Symbol;Acc:29349]	2.08936	2.42399	90.9674	1.46058e-21	2.29128e-20
ENSG00000104907	TRMT1	tRNA methyltransferase 1 homolog (S. cerevisiae) [Source:HGNC Symbol;Acc:25980]	0.877611	6.22501	90.9016	1.50997e-21	2.36627e-20
ENSG00000236255	AC009404.2		1.90646	2.01488	90.6831	1.68631e-21	2.63981e-20
ENSG00000125520	SLC2A4RG	SLC2A4 regulator [Source:HGNC Symbol;Acc:15930]	-2.17201	2.49536	90.6633	1.7032e-21	2.66344e-20
ENSG00000170873	MTSS1	metastasis suppressor 1 [Source:HGNC Symbol;Acc:20443]	-0.982727	4.77525	90.6053	1.7539e-21	2.73983e-20
ENSG00000152661	GJA1	gap junction protein, alpha 1, 43kDa [Source:HGNC Symbol;Acc:4274]	0.57632	8.13884	90.5886	1.76881e-21	2.7602e-20
ENSG00000050405	LIMA1	LIM domain and actin binding 1 [Source:HGNC Symbol;Acc:24636]	0.617786	7.30486	90.5464	1.80685e-21	2.8166e-20
ENSG00000184983	NDUFA6	NADH dehydrogenase (ubiquinone) 1 alpha subcomplex, 6, 14kDa [Source:HGNC Symbol;Acc:7690]	-0.672607	6.52063	90.5245	1.82703e-21	2.84505e-20
ENSG00000198088	NUP62CL	nucleoporin 62kDa C-terminal like [Source:HGNC Symbol;Acc:25960]	-1.84596	2.32822	90.3988	1.94688e-21	3.0285e-20
ENSG00000116977	LGALS8	lectin, galactoside-binding, soluble, 8 [Source:HGNC Symbol;Acc:6569]	1.03674	4.61864	90.195	2.15811e-21	3.35357e-20
ENSG00000182568	SATB1	SATB homeobox 1 [Source:HGNC Symbol;Acc:10541]	-0.551397	8.19894	89.9148	2.48641e-21	3.85966e-20
ENSG00000112742	TTK	TTK protein kinase [Source:HGNC Symbol;Acc:12401]	-0.726671	6.53259	89.9062	2.49722e-21	3.8724e-20
ENSG00000156869	FRRS1	ferric-chelate reductase 1 [Source:HGNC Symbol;Acc:27622]	1.40292	3.45511	89.8966	2.50943e-21	3.88725e-20
ENSG00000197128	ZNF772	zinc finger protein 772 [Source:HGNC Symbol;Acc:33106]	1.13389	3.97426	89.887	2.52153e-21	3.90192e-20
ENSG00000078687	TNRC6C	trinucleotide repeat containing 6C [Source:HGNC Symbol;Acc:29318]	0.899934	5.48765	89.762	2.6861e-21	4.15225e-20
ENSG00000152894	PTPRK	protein tyrosine phosphatase, receptor type, K [Source:HGNC Symbol;Acc:9674]	0.762815	5.79824	89.6572	2.83211e-21	4.37339e-20
ENSG00000185070	FLRT2	fibronectin leucine rich transmembrane protein 2 [Source:HGNC Symbol;Acc:3761]	0.970496	5.02023	89.5247	3.02832e-21	4.6715e-20
ENSG00000115232	ITGA4	integrin, alpha 4 (antigen CD49D, alpha 4 subunit of VLA-4 receptor) [Source:HGNC Symbol;Acc:6140]	-0.670936	6.49559	89.427	3.18161e-21	4.90286e-20
ENSG00000143799	PARP1	poly (ADP-ribose) polymerase 1 [Source:HGNC Symbol;Acc:270]	-0.502587	9.20337	89.3259	3.34844e-21	5.15458e-20
ENSG00000197961	ZNF121	zinc finger protein 121 [Source:HGNC Symbol;Acc:12904]	0.785981	5.72797	89.2912	3.40778e-21	5.24048e-20
ENSG00000091947	TMEM101	transmembrane protein 101 [Source:HGNC Symbol;Acc:28653]	-1.36675	4.03916	89.2424	3.49276e-21	5.36559e-20
ENSG00000130810	PPAN	peter pan homolog (Drosophila) [Source:HGNC Symbol;Acc:9227]	1.73861	2.65447	89.2081	3.55383e-21	5.45375e-20
ENSG00000107672	NSMCE4A	non-SMC element 4 homolog A (S. cerevisiae) [Source:HGNC Symbol;Acc:25935]	-0.828709	5.76193	89.1888	3.58876e-21	5.50165e-20
ENSG00000170836	PPM1D	protein phosphatase, Mg2+/Mn2+ dependent, 1D [Source:HGNC Symbol;Acc:9277]	0.672465	7.03981	89.1024	3.74902e-21	5.7414e-20
ENSG00000131725	WDR44	WD repeat domain 44 [Source:HGNC Symbol;Acc:30512]	1.0562	4.79141	89.0433	3.86256e-21	5.90915e-20
ENSG00000108061	SHOC2	soc-2 suppressor of clear homolog (C. elegans) [Source:HGNC Symbol;Acc:15454]	-0.681454	6.75059	88.7516	4.47635e-21	6.84109e-20
ENSG00000177098	SCN4B	sodium channel, voltage-gated, type IV, beta subunit [Source:HGNC Symbol;Acc:10592]	3.97091	-0.00950557	88.6995	4.59581e-21	7.01642e-20
ENSG00000183808	RBM12B	RNA binding motif protein 12B [Source:HGNC Symbol;Acc:32310]	0.708502	6.58174	88.6904	4.61703e-21	7.04157e-20
ENSG00000112697	TMEM30A	transmembrane protein 30A [Source:HGNC Symbol;Acc:16667]	0.601776	7.63804	88.5984	4.8369e-21	7.36931e-20
ENSG00000171314	PGAM1	phosphoglycerate mutase 1 (brain) [Source:HGNC Symbol;Acc:8888]	-0.53978	8.1049	88.5279	5.01225e-21	7.62862e-20
ENSG00000165458	INPPL1	inositol polyphosphate phosphatase-like 1 [Source:HGNC Symbol;Acc:6080]	0.79385	6.9755	88.5106	5.05642e-21	7.68793e-20
ENSG00000106628	POLD2	polymerase (DNA directed), delta 2, accessory subunit [Source:HGNC Symbol;Acc:9176]	-0.759309	6.28242	88.4714	5.15763e-21	7.83378e-20
ENSG00000135164	DMTF1	cyclin D binding myb-like transcription factor 1 [Source:HGNC Symbol;Acc:14603]	0.582855	7.4106	88.4301	5.2664e-21	7.99079e-20
ENSG00000125257	ABCC4	ATP-binding cassette, sub-family C (CFTR/MRP), member 4 [Source:HGNC Symbol;Acc:55]	-0.835558	5.59659	88.4128	5.31257e-21	8.0526e-20
ENSG00000125503	PPP1R12C	protein phosphatase 1, regulatory subunit 12C [Source:HGNC Symbol;Acc:14947]	1.32296	4.59249	88.41	5.32013e-21	8.05581e-20
ENSG00000172534	HCFC1	host cell factor C1 (VP16-accessory protein) [Source:HGNC Symbol;Acc:4839]	0.879373	7.36929	88.3034	5.61477e-21	8.49327e-20
ENSG00000198625	MDM4	Mdm4 p53 binding protein homolog (mouse) [Source:HGNC Symbol;Acc:6974]	0.617352	7.39848	88.2901	5.65248e-21	8.54158e-20
ENSG00000125046	C3orf32	chromosome 3 open reading frame 32 [Source:HGNC Symbol;Acc:24809]	3.5584	0.168153	88.2617	5.73422e-21	8.65628e-20
ENSG00000198626	RYR2	ryanodine receptor 2 (cardiac) [Source:HGNC Symbol;Acc:10484]	0.821191	5.40808	88.1638	6.02526e-21	9.08637e-20
ENSG00000198890	PRMT6	protein arginine methyltransferase 6 [Source:HGNC Symbol;Acc:18241]	-0.741002	6.17857	88.0197	6.48047e-21	9.7629e-20
ENSG00000113448	PDE4D	phosphodiesterase 4D, cAMP-specific [Source:HGNC Symbol;Acc:8783]	1.48912	3.40551	87.9619	6.67281e-21	1.00424e-19
ENSG00000099260	PALMD	palmdelphin [Source:HGNC Symbol;Acc:15846]	0.85041	5.21128	87.9011	6.88088e-21	1.03451e-19
ENSG00000115307	AUP1	ancient ubiquitous protein 1 [Source:HGNC Symbol;Acc:891]	0.678634	6.73511	87.8769	6.96587e-21	1.04622e-19
ENSG00000005022	SLC25A5	solute carrier family 25 (mitochondrial carrier; adenine nucleotide translocator), member 5 [Source:HGNC Symbol;Acc:10991]	-0.591516	7.6467	87.8739	6.97628e-21	1.04672e-19
ENSG00000116514	RNF19B	ring finger protein 19B [Source:HGNC Symbol;Acc:26886]	1.06037	4.29157	87.8671	7.00025e-21	1.04926e-19
ENSG00000184371	CSF1	colony stimulating factor 1 (macrophage) [Source:HGNC Symbol;Acc:2432]	1.54964	2.59396	87.7039	7.60252e-21	1.13838e-19
ENSG00000117525	F3	coagulation factor III (thromboplastin, tissue factor) [Source:HGNC Symbol;Acc:3541]	-1.128	4.61959	87.6931	7.64401e-21	1.14344e-19
ENSG00000035499	DEPDC1B	DEP domain containing 1B [Source:HGNC Symbol;Acc:24902]	-0.688979	6.44107	87.6272	7.90322e-21	1.18102e-19
ENSG00000114650	SCAP	SREBF chaperone [Source:HGNC Symbol;Acc:30634]	0.873863	5.91575	87.5676	8.14478e-21	1.21589e-19
ENSG00000132128	LRRC41	leucine rich repeat containing 41 [Source:HGNC Symbol;Acc:16917]	0.796408	5.92775	87.5617	8.16902e-21	1.21828e-19
ENSG00000169169	CPT1C	carnitine palmitoyltransferase 1C [Source:HGNC Symbol;Acc:18540]	0.887651	5.73129	87.4621	8.59115e-21	1.27994e-19
ENSG00000156970	BUB1B	budding uninhibited by benzimidazoles 1 homolog beta (yeast) [Source:HGNC Symbol;Acc:1149]	-0.590791	7.32126	87.3664	9.01685e-21	1.34201e-19
ENSG00000166123	GPT2	glutamic pyruvate transaminase (alanine aminotransferase) 2 [Source:HGNC Symbol;Acc:18062]	0.742945	6.55068	87.3588	9.05169e-21	1.34585e-19
ENSG00000248015	AC005329.7		1.87584	2.13849	87.2895	9.37427e-21	1.39241e-19
ENSG00000147955	SIGMAR1	sigma non-opioid intracellular receptor 1 [Source:HGNC Symbol;Acc:8157]	-0.719289	6.3234	87.2767	9.43546e-21	1.39923e-19
ENSG00000104320	NBN	nibrin [Source:HGNC Symbol;Acc:7652]	-0.686452	7.31465	87.2759	9.43905e-21	1.39923e-19
ENSG00000128708	HAT1	histone acetyltransferase 1 [Source:HGNC Symbol;Acc:4821]	-0.701923	6.51872	87.2459	9.58334e-21	1.4192e-19
ENSG00000123358	NR4A1	nuclear receptor subfamily 4, group A, member 1 [Source:HGNC Symbol;Acc:7980]	1.5435	3.38599	87.2375	9.62436e-21	1.42385e-19
ENSG00000105486	LIG1	ligase I, DNA, ATP-dependent [Source:HGNC Symbol;Acc:6598]	-0.923295	5.46103	87.1887	9.86475e-21	1.45796e-19
ENSG00000139684	ESD	esterase D [Source:HGNC Symbol;Acc:3465]	-0.649674	7.36103	87.1341	1.01408e-20	1.49726e-19
ENSG00000197043	ANXA6	annexin A6 [Source:HGNC Symbol;Acc:544]	-0.662045	6.63758	87.0337	1.06687e-20	1.57364e-19
ENSG00000128578	FAM40B	family with sequence similarity 40, member B [Source:HGNC Symbol;Acc:22209]	-1.17724	4.1861	86.9394	1.11899e-20	1.64886e-19
ENSG00000215154	AC141586.5		0.996114	4.83726	86.9371	1.12027e-20	1.64912e-19
ENSG00000014914	MTMR11	myotubularin related protein 11 [Source:HGNC Symbol;Acc:24307]	1.97077	2.75555	86.7176	1.25177e-20	1.84086e-19
ENSG00000205903	ZNF316	zinc finger protein 316 [Source:HGNC Symbol;Acc:13843]	1.39565	4.09375	86.7048	1.25992e-20	1.85101e-19
ENSG00000133863	TEX15	testis expressed 15 [Source:HGNC Symbol;Acc:11738]	-0.662536	6.42207	86.5258	1.37924e-20	2.0243e-19
ENSG00000135365	PHF21A	PHD finger protein 21A [Source:HGNC Symbol;Acc:24156]	0.765254	5.91313	86.4684	1.41987e-20	2.08187e-19
ENSG00000117155	SSX2IP	synovial sarcoma, X breakpoint 2 interacting protein [Source:HGNC Symbol;Acc:16509]	-0.684827	6.76338	86.3665	1.49496e-20	2.18979e-19
ENSG00000168702	LRP1B	low density lipoprotein receptor-related protein 1B [Source:HGNC Symbol;Acc:6693]	1.16624	4.31863	86.3604	1.49958e-20	2.19439e-19
ENSG00000168386	FILIP1L	filamin A interacting protein 1-like [Source:HGNC Symbol;Acc:24589]	1.51515	3.16552	86.2155	1.61355e-20	2.35884e-19
ENSG00000125266	EFNB2	ephrin-B2 [Source:HGNC Symbol;Acc:3227]	1.32253	4.12768	86.1888	1.63549e-20	2.38856e-19
ENSG00000160298	C21orf58	chromosome 21 open reading frame 58 [Source:HGNC Symbol;Acc:1300]	-1.3178	3.73173	86.173	1.64862e-20	2.40536e-19
ENSG00000240230	COX19	COX19 cytochrome c oxidase assembly homolog (S. cerevisiae) [Source:HGNC Symbol;Acc:28074]	1.04978	4.41413	86.1355	1.68017e-20	2.44897e-19
ENSG00000173207	CKS1B	CDC28 protein kinase regulatory subunit 1B [Source:HGNC Symbol;Acc:19083]	-0.512908	8.46906	86.0782	1.72963e-20	2.51859e-19
ENSG00000019549	SNAI2	snail homolog 2 (Drosophila) [Source:HGNC Symbol;Acc:11094]	-0.781589	5.84479	86.0302	1.77207e-20	2.57786e-19
ENSG00000198863	RUNDC1	RUN domain containing 1 [Source:HGNC Symbol;Acc:25418]	0.708212	6.06787	85.9754	1.8219e-20	2.64775e-19
ENSG00000171681	ATF7IP	activating transcription factor 7 interacting protein [Source:HGNC Symbol;Acc:20092]	0.621974	6.74529	85.8554	1.9359e-20	2.81065e-19
ENSG00000143815	LBR	lamin B receptor [Source:HGNC Symbol;Acc:6518]	-0.570563	8.13943	85.7812	2.00985e-20	2.91383e-19
ENSG00000107537	PHYH	phytanoyl-CoA 2-hydroxylase [Source:HGNC Symbol;Acc:8940]	-1.23144	3.88371	85.7802	2.01089e-20	2.91383e-19
ENSG00000198952	SMG5	smg-5 homolog, nonsense mediated mRNA decay factor (C. elegans) [Source:HGNC Symbol;Acc:24644]	0.610258	8.7334	85.7736	2.01767e-20	2.92079e-19
ENSG00000129103	SUMF2	sulfatase modifying factor 2 [Source:HGNC Symbol;Acc:20415]	-0.676423	6.29873	85.6578	2.13934e-20	3.0939e-19
ENSG00000171150	SOCS5	suppressor of cytokine signaling 5 [Source:HGNC Symbol;Acc:16852]	0.804432	5.58505	85.6533	2.14414e-20	3.09781e-19
ENSG00000173064	HECTD4	HECT domain containing E3 ubiquitin protein ligase 4 [Source:HGNC Symbol;Acc:26611]	0.743689	6.36981	85.6153	2.18578e-20	3.1549e-19
ENSG00000137221	TJAP1	tight junction associated protein 1 (peripheral) [Source:HGNC Symbol;Acc:17949]	1.11139	4.98545	85.5032	2.31323e-20	3.3356e-19
ENSG00000135905	DOCK10	dedicator of cytokinesis 10 [Source:HGNC Symbol;Acc:23479]	-0.891974	5.31822	85.4343	2.39529e-20	3.45057e-19
ENSG00000173334	TRIB1	tribbles homolog 1 (Drosophila) [Source:HGNC Symbol;Acc:16891]	1.17503	4.27473	85.3778	2.46471e-20	3.54712e-19
ENSG00000103064	SLC7A6	solute carrier family 7 (amino acid transporter light chain, y+L system), member 6 [Source:HGNC Symbol;Acc:11064]	0.741383	5.9366	85.369	2.47573e-20	3.55952e-19
ENSG00000080839	RBL1	retinoblastoma-like 1 (p107) [Source:HGNC Symbol;Acc:9893]	-0.946248	5.4041	85.3495	2.50021e-20	3.59124e-19
ENSG00000204060	FOXO6	forkhead box O6 [Source:HGNC Symbol;Acc:24814]	1.69821	2.96996	85.3317	2.52282e-20	3.62019e-19
ENSG00000119401	TRIM32	tripartite motif containing 32 [Source:HGNC Symbol;Acc:16380]	0.794569	5.49946	85.3086	2.55248e-20	3.65922e-19
ENSG00000165671	NSD1	nuclear receptor binding SET domain protein 1 [Source:HGNC Symbol;Acc:14234]	0.542083	7.78076	85.2204	2.6689e-20	3.82242e-19
ENSG00000186312	CA5BP1	carbonic anhydrase VB pseudogene 1 [Source:HGNC Symbol;Acc:29544]	1.29149	3.79729	85.1544	2.75953e-20	3.94839e-19
ENSG00000102924	CBLN1	cerebellin 1 precursor [Source:HGNC Symbol;Acc:1543]	-1.54512	2.90088	85.0197	2.9541e-20	4.22272e-19
ENSG00000214655	KIAA0913	KIAA0913 [Source:HGNC Symbol;Acc:23528]	1.09467	4.74259	84.9876	3.00245e-20	4.28769e-19
ENSG00000177519	RPRM	reprimo, TP53 dependent G2 arrest mediator candidate [Source:HGNC Symbol;Acc:24201]	2.16016	2.62926	84.9761	3.01989e-20	4.30843e-19
ENSG00000134574	DDB2	damage-specific DNA binding protein 2, 48kDa [Source:HGNC Symbol;Acc:2718]	1.80573	2.1979	84.9506	3.05919e-20	4.36031e-19
ENSG00000137070	IL11RA	interleukin 11 receptor, alpha [Source:HGNC Symbol;Acc:5967]	-0.994569	4.7732	84.9473	3.06419e-20	4.36323e-19
ENSG00000204186	ZDBF2	zinc finger, DBF-type containing 2 [Source:HGNC Symbol;Acc:29313]	0.632131	6.58206	84.9277	3.0948e-20	4.40258e-19
ENSG00000260293	RP11-715J22.6		-1.87076	2.18417	84.8409	3.23361e-20	4.59564e-19
ENSG00000143870	PDIA6	protein disulfide isomerase family A, member 6 [Source:HGNC Symbol;Acc:30168]	-0.558764	7.35492	84.7422	3.3991e-20	4.8262e-19
ENSG00000108309	RUNDC3A	RUN domain containing 3A [Source:HGNC Symbol;Acc:16984]	0.99217	4.74295	84.7322	3.41636e-20	4.84606e-19
ENSG00000167566	NCKAP5L	NCK-associated protein 5-like [Source:HGNC Symbol;Acc:29321]	1.18689	4.60815	84.656	3.55071e-20	5.02973e-19
ENSG00000178764	ZHX2	zinc fingers and homeoboxes 2 [Source:HGNC Symbol;Acc:18513]	1.57151	2.49019	84.6549	3.55264e-20	5.02973e-19
ENSG00000171606	ZNF274	zinc finger protein 274 [Source:HGNC Symbol;Acc:13068]	1.26047	3.50217	84.5864	3.67778e-20	5.20194e-19
ENSG00000187051	RPS19BP1	ribosomal protein S19 binding protein 1 [Source:HGNC Symbol;Acc:28749]	0.953657	5.30396	84.4697	3.90144e-20	5.51302e-19
ENSG00000184792	OSBP2	oxysterol binding protein 2 [Source:HGNC Symbol;Acc:8504]	1.31649	3.34105	84.3599	4.12422e-20	5.82227e-19
ENSG00000146242	TPBG	trophoblast glycoprotein [Source:HGNC Symbol;Acc:12004]	1.86804	2.05493	84.3054	4.23964e-20	5.97951e-19
ENSG00000078900	TP73	tumor protein p73 [Source:HGNC Symbol;Acc:12003]	-2.24286	2.07136	84.2182	4.43079e-20	6.24315e-19
ENSG00000204228	HSD17B8	hydroxysteroid (17-beta) dehydrogenase 8 [Source:HGNC Symbol;Acc:3554]	-3.63786	0.651973	84.1131	4.67272e-20	6.57779e-19
ENSG00000196361	ELAVL3	ELAV (embryonic lethal, abnormal vision, Drosophila)-like 3 (Hu antigen C) [Source:HGNC Symbol;Acc:3314]	0.801083	5.83183	84.0558	4.81002e-20	6.76463e-19
ENSG00000172932	ANKRD13D	ankyrin repeat domain 13 family, member D [Source:HGNC Symbol;Acc:27880]	1.30485	3.68098	84.0468	4.83189e-20	6.78894e-19
ENSG00000103168	TAF1C	TATA box binding protein (TBP)-associated factor, RNA polymerase I, C, 110kDa [Source:HGNC Symbol;Acc:11534]	1.21618	3.95871	83.9197	5.15284e-20	7.23302e-19
ENSG00000107518	ATRNL1	attractin-like 1 [Source:HGNC Symbol;Acc:29063]	-1.31989	3.4609	83.8955	5.21633e-20	7.31522e-19
ENSG00000197894	ADH5	alcohol dehydrogenase 5 (class III), chi polypeptide [Source:HGNC Symbol;Acc:253]	-0.536664	8.0361	83.7341	5.66005e-20	7.92996e-19
ENSG00000128165	ADM2	adrenomedullin 2 [Source:HGNC Symbol;Acc:28898]	1.97303	2.08211	83.6236	5.9854e-20	8.37786e-19
ENSG00000163346	PBXIP1	pre-B-cell leukemia homeobox interacting protein 1 [Source:HGNC Symbol;Acc:21199]	0.794352	6.02109	83.5998	6.05796e-20	8.47142e-19
ENSG00000167159	A)		1.38446	3.42391	83.5438	6.23208e-20	8.70669e-19
ENSG00000196547	MAN2A2	mannosidase, alpha, class 2A, member 2 [Source:HGNC Symbol;Acc:6825]	0.95595	5.04422	83.533	6.26626e-20	8.74619e-19
ENSG00000151726	ACSL1	acyl-CoA synthetase long-chain family member 1 [Source:HGNC Symbol;Acc:3569]	-0.757197	5.73157	83.4595	6.50354e-20	9.06883e-19
ENSG00000065361	ERBB3	v-erb-b2 erythroblastic leukemia viral oncogene homolog 3 (avian) [Source:HGNC Symbol;Acc:3431]	2.70195	0.929283	83.4356	6.58274e-20	9.17062e-19
ENSG00000138650	PCDH10	protocadherin 10 [Source:HGNC Symbol;Acc:13404]	1.54769	2.71702	83.3859	6.75009e-20	9.39493e-19
ENSG00000134291	TMEM106C	transmembrane protein 106C [Source:HGNC Symbol;Acc:28775]	-0.728087	5.90307	83.37	6.80464e-20	9.46197e-19
ENSG00000130054	FAM155B	family with sequence similarity 155, member B [Source:HGNC Symbol;Acc:30701]	1.18779	4.01064	83.2284	7.30994e-20	1.01551e-18
ENSG00000224945	RP11-82L18.2		2.62353	0.987948	83.216	7.35584e-20	1.02092e-18
ENSG00000145349	CAMK2D	calcium/calmodulin-dependent protein kinase II delta [Source:HGNC Symbol;Acc:1462]	-0.661796	6.40422	83.1892	7.45636e-20	1.03391e-18
ENSG00000141252	VPS53	vacuolar protein sorting 53 homolog (S. cerevisiae) [Source:HGNC Symbol;Acc:25608]	0.749311	5.8909	83.1436	7.63039e-20	1.05705e-18
ENSG00000101347	SAMHD1	SAM domain and HD domain 1 [Source:HGNC Symbol;Acc:15925]	0.748679	5.73909	83.1154	7.73993e-20	1.07122e-18
ENSG00000174111	SOCS7	suppressor of cytokine signaling 7 [Source:HGNC Symbol;Acc:29846]	1.12401	4.23938	82.9567	8.38693e-20	1.15968e-18
ENSG00000140470	ADAMTS17	ADAM metallopeptidase with thrombospondin type 1 motif, 17 [Source:HGNC Symbol;Acc:17109]	-1.73712	2.43341	82.8687	8.76904e-20	1.21139e-18
ENSG00000163162	RNF149	ring finger protein 149 [Source:HGNC Symbol;Acc:23137]	0.822315	5.27394	82.8322	8.93211e-20	1.23257e-18
ENSG00000184117	NIPSNAP1	nipsnap homolog 1 (C. elegans) [Source:HGNC Symbol;Acc:7827]	-0.677826	6.33921	82.8307	8.93902e-20	1.23257e-18
ENSG00000146083	RNF44	ring finger protein 44 [Source:HGNC Symbol;Acc:19180]	0.805852	6.0134	82.8274	8.95381e-20	1.23346e-18
ENSG00000198804	MT-CO1	mitochondrially encoded cytochrome c oxidase I [Source:HGNC Symbol;Acc:7419]	0.399071	12.3794	82.7949	9.1026e-20	1.25279e-18
ENSG00000164889	SLC4A2	solute carrier family 4, anion exchanger, member 2 (erythrocyte membrane protein band 3-like 1) [Source:HGNC Symbol;Acc:11028]	0.91834	5.96461	82.7889	9.13016e-20	1.25542e-18
ENSG00000183137	CEP57L1	centrosomal protein 57kDa-like 1 [Source:HGNC Symbol;Acc:21561]	-1.15473	4.40658	82.7089	9.50734e-20	1.30607e-18
ENSG00000128849	CGNL1	cingulin-like 1 [Source:HGNC Symbol;Acc:25931]	-1.07945	4.07716	82.6017	1.00373e-19	1.37759e-18
ENSG00000103126	AXIN1	axin 1 [Source:HGNC Symbol;Acc:903]	1.1538	4.62922	82.5792	1.01519e-19	1.39204e-18
ENSG00000178691	SUZ12	suppressor of zeste 12 homolog (Drosophila) [Source:HGNC Symbol;Acc:17101]	-0.609202	7.32684	82.5587	1.02579e-19	1.40526e-18
ENSG00000156795	WDYHV1	WDYHV motif containing 1 [Source:HGNC Symbol;Acc:25490]	-1.25531	3.76329	82.5457	1.03255e-19	1.41321e-18
ENSG00000165804	ZNF219	zinc finger protein 219 [Source:HGNC Symbol;Acc:13011]	1.32287	4.11166	82.5401	1.03549e-19	1.41594e-18
ENSG00000175445	LPL	lipoprotein lipase [Source:HGNC Symbol;Acc:6677]	-1.46767	3.21486	82.5362	1.0375e-19	1.41737e-18
ENSG00000171469	ZNF561	zinc finger protein 561 [Source:HGNC Symbol;Acc:28684]	0.666973	6.344	82.5027	1.05526e-19	1.44031e-18
ENSG00000179598	PLD6	phospholipase D family, member 6 [Source:HGNC Symbol;Acc:30447]	0.876362	5.16063	82.4348	1.09213e-19	1.48926e-18
ENSG00000136379	FAM108C1	family with sequence similarity 108, member C1 [Source:HGNC Symbol;Acc:26925]	-1.04583	4.64399	82.3967	1.11338e-19	1.51684e-18
ENSG00000169594	BNC1	basonuclin 1 [Source:HGNC Symbol;Acc:1081]	2.61165	1.23223	82.3171	1.15913e-19	1.57771e-18
ENSG00000108465	CDK5RAP3	CDK5 regulatory subunit associated protein 3 [Source:HGNC Symbol;Acc:18673]	-0.639047	7.08648	82.2856	1.17775e-19	1.60159e-18
ENSG00000087152	ATXN7L3	ataxin 7-like 3 [Source:HGNC Symbol;Acc:25416]	0.647832	7.25923	82.2306	1.211e-19	1.64529e-18
ENSG00000103540	CCP110	centriolar coiled coil protein 110kDa [Source:HGNC Symbol;Acc:24342]	0.570522	7.94749	82.1569	1.25703e-19	1.70627e-18
ENSG00000123737	EXOSC9	exosome component 9 [Source:HGNC Symbol;Acc:9137]	-0.614971	6.91589	81.9986	1.36181e-19	1.8468e-18
ENSG00000138801	PAPSS1	3'-phosphoadenosine 5'-phosphosulfate synthase 1 [Source:HGNC Symbol;Acc:8603]	0.571769	7.41637	81.9921	1.36634e-19	1.85124e-18
ENSG00000131375	CAPN7	calpain 7 [Source:HGNC Symbol;Acc:1484]	0.67	6.12147	81.984	1.37194e-19	1.85714e-18
ENSG00000198924	DCLRE1A	DNA cross-link repair 1A [Source:HGNC Symbol;Acc:17660]	-0.835049	5.37487	81.976	1.37749e-19	1.86295e-18
ENSG00000115252	PDE1A	phosphodiesterase 1A, calmodulin-dependent [Source:HGNC Symbol;Acc:8774]	-2.71464	1.13188	81.9547	1.39238e-19	1.88137e-18
ENSG00000173068	BNC2	basonuclin 2 [Source:HGNC Symbol;Acc:30988]	-1.1217	4.00223	81.8869	1.441e-19	1.94529e-18
ENSG00000173442	EHBP1L1	EH domain binding protein 1-like 1 [Source:HGNC Symbol;Acc:30682]	2.58963	1.28858	81.8718	1.45207e-19	1.95844e-18
ENSG00000170011	MYRIP	myosin VIIA and Rab interacting protein [Source:HGNC Symbol;Acc:19156]	-1.20239	3.72968	81.7496	1.54465e-19	2.08142e-18
ENSG00000116521	SCAMP3	secretory carrier membrane protein 3 [Source:HGNC Symbol;Acc:10565]	0.638908	7.08401	81.7159	1.57128e-19	2.11537e-18
ENSG00000117360	PRPF3	PRP3 pre-mRNA processing factor 3 homolog (S. cerevisiae) [Source:HGNC Symbol;Acc:17348]	0.510381	8.37585	81.7104	1.57561e-19	2.11928e-18
ENSG00000136999	NOV	nephroblastoma overexpressed [Source:HGNC Symbol;Acc:7885]	3.193	0.631579	81.7068	1.57846e-19	2.12118e-18
ENSG00000163781	TOPBP1	topoisomerase (DNA) II binding protein 1 [Source:HGNC Symbol;Acc:17008]	-0.560801	7.63959	81.7026	1.58186e-19	2.12383e-18
ENSG00000038295	TLL1	tolloid-like 1 [Source:HGNC Symbol;Acc:11843]	2.69481	1.23803	81.5866	1.67747e-19	2.25014e-18
ENSG00000130203	APOE	apolipoprotein E [Source:HGNC Symbol;Acc:613]	2.77253	0.615217	81.4884	1.76291e-19	2.36261e-18
ENSG00000108106	UBE2S	ubiquitin-conjugating enzyme E2S [Source:HGNC Symbol;Acc:17895]	0.806652	6.70585	81.4035	1.8403e-19	2.46326e-18
ENSG00000162976	PQLC3	PQ loop repeat containing 3 [Source:HGNC Symbol;Acc:28503]	-2.92238	0.621686	81.4024	1.84133e-19	2.46326e-18
ENSG00000157224	CLDN12	claudin 12 [Source:HGNC Symbol;Acc:2034]	0.811425	5.76181	81.3915	1.85154e-19	2.47385e-18
ENSG00000213160	KLHL23	kelch-like 23 (Drosophila) [Source:HGNC Symbol;Acc:27506]	-0.611709	7.41691	81.3904	1.85259e-19	2.47385e-18
ENSG00000100626	GALNTL1	UDP-N-acetyl-alpha-D-galactosamine:polypeptide N-acetylgalactosaminyltransferase-like 1 [Source:HGNC Symbol;Acc:23233]	-1.31306	3.82566	81.362	1.87937e-19	2.50735e-18
ENSG00000162384	C1orf123	chromosome 1 open reading frame 123 [Source:HGNC Symbol;Acc:26059]	-0.714303	6.00048	81.3489	1.89189e-19	2.52178e-18
ENSG00000173531	MST1	macrophage stimulating 1 (hepatocyte growth factor-like) [Source:HGNC Symbol;Acc:7380]	2.38996	1.75683	81.2671	1.9718e-19	2.62593e-18
ENSG00000123473	STIL	SCL/TAL1 interrupting locus [Source:HGNC Symbol;Acc:10879]	-0.681815	6.36934	81.12	2.12416e-19	2.82629e-18
ENSG00000198182	ZNF607	zinc finger protein 607 [Source:HGNC Symbol;Acc:28192]	0.916474	4.89701	81.0559	2.19418e-19	2.91684e-18
ENSG00000136636	KCTD3	potassium channel tetramerisation domain containing 3 [Source:HGNC Symbol;Acc:21305]	-0.577271	7.30114	81.0443	2.20719e-19	2.9315e-18
ENSG00000168016	TRANK1	tetratricopeptide repeat and ankyrin repeat containing 1 [Source:HGNC Symbol;Acc:29011]	2.15803	1.45225	81.0386	2.21351e-19	2.93727e-18
ENSG00000183530	PRR14L	proline rich 14-like [Source:HGNC Symbol;Acc:28738]	0.555858	7.2621	80.9695	2.29232e-19	3.03912e-18
ENSG00000119514	GALNT12	UDP-N-acetyl-alpha-D-galactosamine:polypeptide N-acetylgalactosaminyltransferase 12 (GalNAc-T12) [Source:HGNC Symbol;Acc:19877]	-2.22681	1.9866	80.8367	2.45158e-19	3.24736e-18
ENSG00000176915	ANKLE2	ankyrin repeat and LEM domain containing 2 [Source:HGNC Symbol;Acc:29101]	0.561482	7.21189	80.766	2.54094e-19	3.36271e-18
ENSG00000186603	HPDL	4-hydroxyphenylpyruvate dioxygenase-like [Source:HGNC Symbol;Acc:28242]	-1.36623	3.74158	80.7525	2.5584e-19	3.38279e-18
ENSG00000129003	VPS13C	vacuolar protein sorting 13 homolog C (S. cerevisiae) [Source:HGNC Symbol;Acc:23594]	0.56631	7.38391	80.6843	2.64822e-19	3.49844e-18
ENSG00000105722	ERF	Ets2 repressor factor [Source:HGNC Symbol;Acc:3444]	1.23168	4.79278	80.6786	2.65588e-19	3.50543e-18
ENSG00000169116	PARM1	prostate androgen-regulated mucin-like protein 1 [Source:HGNC Symbol;Acc:24536]	2.26827	1.46254	80.6703	2.66695e-19	3.51691e-18
ENSG00000125848	FLRT3	fibronectin leucine rich transmembrane protein 3 [Source:HGNC Symbol;Acc:3762]	-0.649456	6.35533	80.6099	2.74985e-19	3.623e-18
ENSG00000151233	GXYLT1	glucoside xylosyltransferase 1 [Source:HGNC Symbol;Acc:27482]	-0.660754	6.59758	80.6022	2.76053e-19	3.63384e-18
ENSG00000141644	MBD1	methyl-CpG binding domain protein 1 [Source:HGNC Symbol;Acc:6916]	0.769852	5.90665	80.5999	2.76371e-19	3.6348e-18
ENSG00000092036	HAUS4	HAUS augmin-like complex, subunit 4 [Source:HGNC Symbol;Acc:20163]	-1.374	3.2646	80.5663	2.81119e-19	3.69396e-18
ENSG00000102007	PLP2	proteolipid protein 2 (colonic epithelium-enriched) [Source:HGNC Symbol;Acc:9087]	-1.19855	3.94383	80.5041	2.90106e-19	3.80867e-18
ENSG00000164346	NSA2	NSA2 ribosome biogenesis homolog (S. cerevisiae) [Source:HGNC Symbol;Acc:30728]	-0.685444	6.24057	80.4792	2.93783e-19	3.85353e-18
ENSG00000148019	CEP78	centrosomal protein 78kDa [Source:HGNC Symbol;Acc:25740]	-0.652423	7.32788	80.3901	3.07325e-19	4.02759e-18
ENSG00000137331	IER3	immediate early response 3 [Source:HGNC Symbol;Acc:5392]	2.08815	1.48909	80.3672	3.10917e-19	4.07106e-18
ENSG00000182013	PNMAL1	paraneoplastic Ma antigen family-like 1 [Source:HGNC Symbol;Acc:25578]	0.609685	6.52802	80.3469	3.14119e-19	4.10936e-18
ENSG00000185813	PCYT2	phosphate cytidylyltransferase 2, ethanolamine [Source:HGNC Symbol;Acc:8756]	-1.30583	4.18855	80.1437	3.48147e-19	4.55049e-18
ENSG00000075188	NUP37	nucleoporin 37kDa [Source:HGNC Symbol;Acc:29929]	-0.892334	5.16221	80.0908	3.57587e-19	4.66976e-18
ENSG00000115392	FANCL	Fanconi anemia, complementation group L [Source:HGNC Symbol;Acc:20748]	-0.792346	5.62253	80.0607	3.63082e-19	4.73734e-18
ENSG00000164306	CCDC111	coiled-coil domain containing 111 [Source:HGNC Symbol;Acc:26575]	-1.12658	4.08003	80.0303	3.68705e-19	4.80648e-18
ENSG00000004700	RECQL	RecQ protein-like (DNA helicase Q1-like) [Source:HGNC Symbol;Acc:9948]	-0.755857	5.81802	79.9875	3.76795e-19	4.90762e-18
ENSG00000104447	TRPS1	trichorhinophalangeal syndrome I [Source:HGNC Symbol;Acc:12340]	0.848639	5.28749	79.9511	3.8379e-19	4.99432e-18
ENSG00000118402	ELOVL4	ELOVL fatty acid elongase 4 [Source:HGNC Symbol;Acc:14415]	0.908496	4.95052	79.9375	3.86443e-19	5.02444e-18
ENSG00000176593	CTD-2368P22.1	HCG1811579; Uncharacterized protein [Source:UniProtKB/TrEMBL;Acc:G5E958]	1.64	2.13161	79.9305	3.87818e-19	5.03789e-18
ENSG00000108819	PPP1R9B	protein phosphatase 1, regulatory subunit 9B [Source:HGNC Symbol;Acc:9298]	0.843345	6.40428	79.9184	3.902e-19	5.06439e-18
ENSG00000110395	CBL	Cbl proto-oncogene, E3 ubiquitin protein ligase [Source:HGNC Symbol;Acc:1541]	0.785964	5.52227	79.9109	3.91673e-19	5.07906e-18
ENSG00000228998	RP11-697E2.7		0.760873	5.54712	79.8565	4.02622e-19	5.21648e-18
ENSG00000180626	ZNF594	zinc finger protein 594 [Source:HGNC Symbol;Acc:29392]	0.766753	5.67775	79.8479	4.04367e-19	5.2345e-18
ENSG00000130821	SLC6A8	solute carrier family 6 (neurotransmitter transporter, creatine), member 8 [Source:HGNC Symbol;Acc:11055]	1.04283	4.5847	79.7306	4.29111e-19	5.54996e-18
ENSG00000176986	SEC24C	SEC24 family, member C (S. cerevisiae) [Source:HGNC Symbol;Acc:10705]	0.623975	7.16149	79.7236	4.30632e-19	5.56477e-18
ENSG00000115365	LANCL1	LanC lantibiotic synthetase component C-like 1 (bacterial) [Source:HGNC Symbol;Acc:6508]	-0.57501	7.4032	79.7054	4.34621e-19	5.61142e-18
ENSG00000108389	MTMR4	myotubularin related protein 4 [Source:HGNC Symbol;Acc:7452]	-0.514976	8.02005	79.5547	4.69055e-19	6.05073e-18
ENSG00000242028	C15orf63	chromosome 15 open reading frame 63 [Source:HGNC Symbol;Acc:18418]	1.77885	2.23882	79.5155	4.78466e-19	6.16675e-18
ENSG00000106571	GLI3	GLI family zinc finger 3 [Source:HGNC Symbol;Acc:4319]	-0.601615	6.93247	79.4095	5.04825e-19	6.50083e-18
ENSG00000180901	KCTD2	potassium channel tetramerisation domain containing 2 [Source:HGNC Symbol;Acc:21294]	0.668777	6.31285	79.4024	5.06637e-19	6.51849e-18
ENSG00000221866	PLXNA4	plexin A4 [Source:HGNC Symbol;Acc:9102]	-2.99364	0.654308	79.386	5.1087e-19	6.56725e-18
ENSG00000173692	PSMD1	proteasome (prosome, macropain) 26S subunit, non-ATPase, 1 [Source:HGNC Symbol;Acc:9554]	-0.515775	8.13398	79.3167	5.29101e-19	6.79571e-18
ENSG00000188994	ZNF292	zinc finger protein 292 [Source:HGNC Symbol;Acc:18410]	0.60777	7.35065	79.2187	5.56014e-19	7.13519e-18
ENSG00000062822	POLD1	polymerase (DNA directed), delta 1, catalytic subunit [Source:HGNC Symbol;Acc:9175]	-1.11363	5.19546	79.1278	5.82199e-19	7.46475e-18
ENSG00000079739	PGM1	phosphoglucomutase 1 [Source:HGNC Symbol;Acc:8905]	-0.769185	5.62097	79.0965	5.91495e-19	7.57738e-18
ENSG00000135823	STX6	syntaxin 6 [Source:HGNC Symbol;Acc:11441]	0.660878	6.13786	79.0704	5.99366e-19	7.67157e-18
ENSG00000125821	DTD1	D-tyrosyl-tRNA deacylase 1 homolog (S. cerevisiae) [Source:HGNC Symbol;Acc:16219]	-0.928116	5.09979	79.0245	6.13429e-19	7.8448e-18
ENSG00000165388	ZNF488	zinc finger protein 488 [Source:HGNC Symbol;Acc:23535]	-1.7635	2.35009	78.9127	6.49171e-19	8.29471e-18
ENSG00000152926	ZNF117	zinc finger protein 117 [Source:HGNC Symbol;Acc:12897]	0.79961	5.47442	78.822	6.79675e-19	8.67699e-18
ENSG00000114956	DGUOK	deoxyguanosine kinase [Source:HGNC Symbol;Acc:2858]	0.700099	6.0467	78.7769	6.95342e-19	8.86935e-18
ENSG00000186868	MAPT	microtubule-associated protein tau [Source:HGNC Symbol;Acc:6893]	1.71592	2.36629	78.6213	7.5234e-19	9.58812e-18
ENSG00000183283	DAZAP2	DAZ associated protein 2 [Source:HGNC Symbol;Acc:2684]	0.566277	7.01199	78.4842	8.06424e-19	1.02686e-17
ENSG00000102743	SLC25A15	solute carrier family 25 (mitochondrial carrier; ornithine transporter) member 15 [Source:HGNC Symbol;Acc:10985]	-0.784268	5.70533	78.4463	8.22027e-19	1.04582e-17
ENSG00000117748	RPA2	replication protein A2, 32kDa [Source:HGNC Symbol;Acc:10290]	-0.632528	6.79187	78.4393	8.2495e-19	1.04864e-17
ENSG00000004777	ARHGAP33	Rho GTPase activating protein 33 [Source:HGNC Symbol;Acc:23085]	-1.74349	2.70694	78.4291	8.29224e-19	1.05317e-17
ENSG00000196458	ZNF605	zinc finger protein 605 [Source:HGNC Symbol;Acc:28068]	0.699333	6.41975	78.4006	8.41261e-19	1.06754e-17
ENSG00000109738	GLRB	glycine receptor, beta [Source:HGNC Symbol;Acc:4329]	1.30142	3.71575	78.3551	8.60857e-19	1.09147e-17
ENSG00000166557	TMED3	transmembrane emp24 protein transport domain containing 3 [Source:HGNC Symbol;Acc:28889]	0.70381	6.01873	78.3459	8.64869e-19	1.09562e-17
ENSG00000090061	CCNK	cyclin K [Source:HGNC Symbol;Acc:1596]	0.670963	6.33264	78.3316	8.71168e-19	1.10266e-17
ENSG00000176945	MUC20	mucin 20, cell surface associated [Source:HGNC Symbol;Acc:23282]	1.84684	1.95319	78.3187	8.76899e-19	1.10897e-17
ENSG00000109680	TBC1D19	TBC1 domain family, member 19 [Source:HGNC Symbol;Acc:25624]	-1.23952	4.48136	78.2823	8.93175e-19	1.12859e-17
ENSG00000112531	QKI	QKI, KH domain containing, RNA binding [Source:HGNC Symbol;Acc:21100]	-0.503488	8.60983	78.2577	9.04376e-19	1.14176e-17
ENSG00000198901	PRC1	protein regulator of cytokinesis 1 [Source:HGNC Symbol;Acc:9341]	-0.525606	8.09441	78.2467	9.09411e-19	1.14714e-17
ENSG00000148798	INA	internexin neuronal intermediate filament protein, alpha [Source:HGNC Symbol;Acc:6057]	0.497666	8.34087	78.2441	9.10633e-19	1.14771e-17
ENSG00000166439	RNF169	ring finger protein 169 [Source:HGNC Symbol;Acc:26961]	0.666108	6.12668	78.1668	9.46957e-19	1.19247e-17
ENSG00000143198	MGST3	microsomal glutathione S-transferase 3 [Source:HGNC Symbol;Acc:7064]	-0.777565	5.54684	78.0099	1.02525e-18	1.28997e-17
ENSG00000140479	PCSK6	proprotein convertase subtilisin/kexin type 6 [Source:HGNC Symbol;Acc:8569]	-0.974274	4.91284	77.9459	1.05901e-18	1.33132e-17
ENSG00000168566	SNRNP48	small nuclear ribonucleoprotein 48kDa (U11/U12) [Source:HGNC Symbol;Acc:21368]	0.781688	5.53575	77.8827	1.09343e-18	1.37342e-17
ENSG00000149257	SERPINH1	serpin peptidase inhibitor, clade H (heat shock protein 47), member 1, (collagen binding protein 1) [Source:HGNC Symbol;Acc:1546]	0.945046	5.78511	77.8748	1.0978e-18	1.37774e-17
ENSG00000237149	ZNF503-AS2	ZNF503 antisense RNA 2 [Source:HGNC Symbol;Acc:23525]	2.72574	0.817485	77.7895	1.14627e-18	1.43735e-17
ENSG00000187123	LYPD6	LY6/PLAUR domain containing 6 [Source:HGNC Symbol;Acc:28751]	-1.15404	3.93086	77.7492	1.16991e-18	1.46513e-17
ENSG00000008300	CELSR3	cadherin, EGF LAG seven-pass G-type receptor 3 (flamingo homolog, Drosophila) [Source:HGNC Symbol;Acc:3230]	1.03458	4.88934	77.7484	1.17041e-18	1.46513e-17
ENSG00000060339	CCAR1	cell division cycle and apoptosis regulator 1 [Source:HGNC Symbol;Acc:24236]	0.529468	8.47806	77.6301	1.24259e-18	1.55418e-17
ENSG00000141570	CBX8	chromobox homolog 8 [Source:HGNC Symbol;Acc:15962]	0.85108	5.9571	77.6236	1.24672e-18	1.55803e-17
ENSG00000118046	STK11	serine/threonine kinase 11 [Source:HGNC Symbol;Acc:11389]	1.09048	4.63154	77.4993	1.32768e-18	1.65781e-17
ENSG00000228032	C14orf144	chromosome 14 open reading frame 144 [Source:HGNC Symbol;Acc:20358]	-1.59634	2.28286	77.4841	1.33797e-18	1.66924e-17
ENSG00000182308	DCAF4L1	DDB1 and CUL4 associated factor 4-like 1 [Source:HGNC Symbol;Acc:27723]	2.72766	0.987454	77.4793	1.34119e-18	1.67186e-17
ENSG00000115282	TTC31	tetratricopeptide repeat domain 31 [Source:HGNC Symbol;Acc:25759]	-0.956754	4.83045	77.4157	1.38507e-18	1.72511e-17
ENSG00000129474	AJUBA	ajuba LIM protein [Source:HGNC Symbol;Acc:20250]	0.778627	5.52415	77.3347	1.44308e-18	1.79585e-17
ENSG00000246859	STARD4-AS1	STARD4 antisense RNA 1 [Source:HGNC Symbol;Acc:44117]	0.830157	5.16975	77.1344	1.59711e-18	1.98586e-17
ENSG00000135336	ORC3	origin recognition complex, subunit 3 [Source:HGNC Symbol;Acc:8489]	-0.722376	6.05797	77.131	1.59989e-18	1.98764e-17
ENSG00000174996	KLC2	kinesin light chain 2 [Source:HGNC Symbol;Acc:20716]	1.16213	4.66182	77.061	1.6576e-18	2.05762e-17
ENSG00000173473	SMARCC1	SWI/SNF related, matrix associated, actin dependent regulator of chromatin, subfamily c, member 1 [Source:HGNC Symbol;Acc:11104]	-0.466294	9.07756	76.9938	1.71494e-18	2.12527e-17
ENSG00000188976	NOC2L	nucleolar complex associated 2 homolog (S. cerevisiae) [Source:HGNC Symbol;Acc:24517]	0.894958	5.60524	76.9938	1.71497e-18	2.12527e-17
ENSG00000198355	PIM3	pim-3 oncogene [Source:HGNC Symbol;Acc:19310]	1.10817	4.57337	76.9699	1.73586e-18	2.14936e-17
ENSG00000231607	DLEU2	deleted in lymphocytic leukemia 2 (non-protein coding) [Source:HGNC Symbol;Acc:13748]	-1.25821	3.54647	76.8986	1.79965e-18	2.22648e-17
ENSG00000099622	CIRBP	cold inducible RNA binding protein [Source:HGNC Symbol;Acc:1982]	-0.613569	7.63191	76.8821	1.81476e-18	2.2433e-17
ENSG00000181222	POLR2A	polymerase (RNA) II (DNA directed) polypeptide A, 220kDa [Source:HGNC Symbol;Acc:9187]	0.636472	8.5721	76.8047	1.88731e-18	2.33104e-17
ENSG00000102401	ARMCX3	armadillo repeat containing, X-linked 3 [Source:HGNC Symbol;Acc:24065]	0.583979	6.90045	76.7538	1.93658e-18	2.38991e-17
ENSG00000116478	HDAC1	histone deacetylase 1 [Source:HGNC Symbol;Acc:4852]	0.541263	7.26502	76.7407	1.94943e-18	2.40376e-17
ENSG00000121454	LHX4	LIM homeobox 4 [Source:HGNC Symbol;Acc:21734]	0.900318	4.86287	76.7377	1.95242e-18	2.40544e-17
ENSG00000183654	MARCH11	membrane-associated ring finger (C3HC4) 11 [Source:HGNC Symbol;Acc:33609]	-1.20131	3.51105	76.7186	1.97134e-18	2.42674e-17
ENSG00000198668	CALM1	calmodulin 1 (phosphorylase kinase, delta) [Source:HGNC Symbol;Acc:1442]	-0.505983	8.07063	76.6817	2.00854e-18	2.47047e-17
ENSG00000163156	SCNM1	sodium channel modifier 1 [Source:HGNC Symbol;Acc:23136]	0.585751	6.70933	76.5898	2.10419e-18	2.58597e-17
ENSG00000223749	AC004383.4		-1.42291	2.59763	76.5752	2.11982e-18	2.60302e-17
ENSG00000011021	CLCN6	chloride channel, voltage-sensitive 6 [Source:HGNC Symbol;Acc:2024]	0.982111	4.4504	76.5319	2.16687e-18	2.65858e-17
ENSG00000116667	C1orf21	chromosome 1 open reading frame 21 [Source:HGNC Symbol;Acc:15494]	-0.837165	5.3604	76.5134	2.1872e-18	2.68131e-17
ENSG00000175928	LRRN1	leucine rich repeat neuronal 1 [Source:HGNC Symbol;Acc:20980]	-0.536141	7.42725	76.469	2.23701e-18	2.74011e-17
ENSG00000122565	CBX3	chromobox homolog 3 [Source:HGNC Symbol;Acc:1553]	-0.510243	9.27074	76.4666	2.23967e-18	2.7411e-17
ENSG00000225190	PLEKHM1	pleckstrin homology domain containing, family M (with RUN domain) member 1 [Source:HGNC Symbol;Acc:29017]	0.992636	4.87124	76.4557	2.25212e-18	2.75406e-17
ENSG00000137962	ARHGAP29	Rho GTPase activating protein 29 [Source:HGNC Symbol;Acc:30207]	-0.902739	5.05255	76.3986	2.31817e-18	2.8325e-17
ENSG00000159713	TPPP3	tubulin polymerization-promoting protein family member 3 [Source:HGNC Symbol;Acc:24162]	2.90524	1.13792	76.3618	2.36181e-18	2.88344e-17
ENSG00000261578	RP11-21L23.2		1.01898	4.10181	76.1676	2.60583e-18	3.17872e-17
ENSG00000107105	ELAVL2	ELAV (embryonic lethal, abnormal vision, Drosophila)-like 2 (Hu antigen B) [Source:HGNC Symbol;Acc:3313]	-0.545702	7.50041	76.1241	2.66381e-18	3.24677e-17
ENSG00000120686	UFM1	ubiquitin-fold modifier 1 [Source:HGNC Symbol;Acc:20597]	0.612431	6.63747	76.1074	2.68651e-18	3.27175e-17
ENSG00000104825	NFKBIB	nuclear factor of kappa light polypeptide gene enhancer in B-cells inhibitor, beta [Source:HGNC Symbol;Acc:7798]	1.22073	3.86803	76.1038	2.69145e-18	3.27507e-17
ENSG00000135776	ABCB10	ATP-binding cassette, sub-family B (MDR/TAP), member 10 [Source:HGNC Symbol;Acc:41]	-0.756538	5.82848	76.0739	2.73239e-18	3.32216e-17
ENSG00000167548	MLL2	myeloid/lymphoid or mixed-lineage leukemia 2 [Source:HGNC Symbol;Acc:7133]	0.837876	7.52788	76.0337	2.78859e-18	3.38772e-17
ENSG00000204381	LAYN	layilin [Source:HGNC Symbol;Acc:29471]	-0.609072	6.56631	76.0313	2.79198e-18	3.38905e-17
ENSG00000141068	KSR1	kinase suppressor of ras 1 [Source:HGNC Symbol;Acc:6465]	1.01298	4.61989	75.915	2.96136e-18	3.59172e-17
ENSG00000151746	BICD1	bicaudal D homolog 1 (Drosophila) [Source:HGNC Symbol;Acc:1049]	-0.648833	6.26999	75.9004	2.98341e-18	3.61549e-17
ENSG00000125650	PSPN	persephin [Source:HGNC Symbol;Acc:9579]	2.52067	1.32831	75.8529	3.05596e-18	3.70038e-17
ENSG00000121413	ZSCAN18	zinc finger and SCAN domain containing 18 [Source:HGNC Symbol;Acc:21037]	1.53453	2.68897	75.8501	3.06043e-18	3.70276e-17
ENSG00000121058	COIL	coilin [Source:HGNC Symbol;Acc:2184]	-0.604413	6.56177	75.831	3.09019e-18	3.73572e-17
ENSG00000147400	CETN2	centrin, EF-hand protein, 2 [Source:HGNC Symbol;Acc:1867]	-0.924759	4.8361	75.7457	3.22646e-18	3.89728e-17
ENSG00000182240	BACE2	beta-site APP-cleaving enzyme 2 [Source:HGNC Symbol;Acc:934]	-1.60176	2.3862	75.6728	3.34784e-18	4.0406e-17
ENSG00000020577	SAMD4A	sterile alpha motif domain containing 4A [Source:HGNC Symbol;Acc:23023]	2.73612	0.448206	75.6658	3.35976e-18	4.05169e-17
ENSG00000166986	MARS	methionyl-tRNA synthetase [Source:HGNC Symbol;Acc:6898]	0.564215	7.99538	75.5286	3.60155e-18	4.33973e-17
ENSG00000196482	ESRRG	estrogen-related receptor gamma [Source:HGNC Symbol;Acc:3474]	-0.649658	6.10644	75.4453	3.75679e-18	4.52311e-17
ENSG00000038210	PI4K2B	phosphatidylinositol 4-kinase type 2 beta [Source:HGNC Symbol;Acc:18215]	-0.814691	5.78905	75.4309	3.7842e-18	4.55242e-17
ENSG00000123136	DDX39A	DEAD (Asp-Glu-Ala-Asp) box polypeptide 39A [Source:HGNC Symbol;Acc:17821]	0.723126	6.52534	75.4093	3.82583e-18	4.59875e-17
ENSG00000137700	SLC37A4	solute carrier family 37 (glucose-6-phosphate transporter), member 4 [Source:HGNC Symbol;Acc:4061]	-1.19728	3.61987	75.3127	4.01771e-18	4.82549e-17
ENSG00000197746	PSAP	prosaposin [Source:HGNC Symbol;Acc:9498]	0.559256	8.10945	75.256	4.1347e-18	4.96198e-17
ENSG00000128285	MCHR1	melanin-concentrating hormone receptor 1 [Source:HGNC Symbol;Acc:4479]	2.07891	1.38724	75.2238	4.20269e-18	5.03949e-17
ENSG00000146263	MMS22L	MMS22-like, DNA repair protein [Source:HGNC Symbol;Acc:21475]	-0.683219	5.99015	75.2187	4.2136e-18	5.04847e-17
ENSG00000187605	TET3	tet methylcytosine dioxygenase 3 [Source:HGNC Symbol;Acc:28313]	1.00106	5.33471	75.2106	4.23099e-18	5.06522e-17
ENSG00000116791	CRYZ	crystallin, zeta (quinone reductase) [Source:HGNC Symbol;Acc:2419]	0.592696	6.84102	75.1119	4.44779e-18	5.32046e-17
ENSG00000255302	EID1	EP300 interacting inhibitor of differentiation 1 [Source:HGNC Symbol;Acc:1191]	-0.604221	8.59429	74.9872	4.73783e-18	5.66283e-17
ENSG00000224470	ATXN1L	ataxin 1-like [Source:HGNC Symbol;Acc:33279]	0.746404	5.63134	74.9777	4.76057e-18	5.68543e-17
ENSG00000204569	PPP1R10	protein phosphatase 1, regulatory subunit 10 [Source:HGNC Symbol;Acc:9284]	0.631287	6.55561	74.9573	4.81011e-18	5.73996e-17
ENSG00000130224	LRCH2	leucine-rich repeats and calponin homology (CH) domain containing 2 [Source:HGNC Symbol;Acc:29292]	0.74618	5.58198	74.8779	5.00733e-18	5.97049e-17
ENSG00000186487	MYT1L	myelin transcription factor 1-like [Source:HGNC Symbol;Acc:7623]	1.60885	2.2098	74.8343	5.11916e-18	6.09893e-17
ENSG00000069702	TGFBR3	transforming growth factor, beta receptor III [Source:HGNC Symbol;Acc:11774]	-1.2537	3.21541	74.8076	5.18886e-18	6.177e-17
ENSG00000092421	SEMA6A	sema domain, transmembrane domain (TM), and cytoplasmic domain, (semaphorin) 6A [Source:HGNC Symbol;Acc:10738]	1.11667	3.90301	74.7282	5.40192e-18	6.42546e-17
ENSG00000214753	HNRNPUL2	heterogeneous nuclear ribonucleoprotein U-like 2 [Source:HGNC Symbol;Acc:25451]	-0.708456	5.77406	74.6169	5.71511e-18	6.79255e-17
ENSG00000197343	ZNF655	zinc finger protein 655 [Source:HGNC Symbol;Acc:30899]	0.587938	7.13959	74.5207	6.00047e-18	7.12598e-17
ENSG00000130783	CCDC62	coiled-coil domain containing 62 [Source:HGNC Symbol;Acc:30723]	2.58518	1.00627	74.4667	6.16684e-18	7.31769e-17
ENSG00000161888	SPC24	SPC24, NDC80 kinetochore complex component, homolog (S. cerevisiae) [Source:HGNC Symbol;Acc:26913]	-1.55012	2.81075	74.464	6.17543e-18	7.32201e-17
ENSG00000065802	ASB1	ankyrin repeat and SOCS box containing 1 [Source:HGNC Symbol;Acc:16011]	0.621108	6.36534	74.3988	6.38272e-18	7.56174e-17
ENSG00000112294	ALDH5A1	aldehyde dehydrogenase 5 family, member A1 [Source:HGNC Symbol;Acc:408]	-0.989357	4.49686	74.3127	6.66736e-18	7.88714e-17
ENSG00000177917	ARL6IP6	ADP-ribosylation-like factor 6 interacting protein 6 [Source:HGNC Symbol;Acc:24048]	-0.742299	5.75284	74.3125	6.66804e-18	7.88714e-17
ENSG00000111981	ULBP1	UL16 binding protein 1 [Source:HGNC Symbol;Acc:14893]	1.21236	3.36272	74.2969	6.72093e-18	7.94335e-17
ENSG00000148411	NACC2	NACC family member 2, BEN and BTB (POZ) domain containing [Source:HGNC Symbol;Acc:23846]	1.42137	3.55629	74.2773	6.78779e-18	8.01598e-17
ENSG00000139697	SBNO1	strawberry notch homolog 1 (Drosophila) [Source:HGNC Symbol;Acc:22973]	0.535991	7.39119	74.1202	7.35014e-18	8.67316e-17
ENSG00000055609	MLL3	myeloid/lymphoid or mixed-lineage leukemia 3 [Source:HGNC Symbol;Acc:13726]	0.531381	7.35044	74.0723	7.53078e-18	8.87924e-17
ENSG00000176894	PXMP2	peroxisomal membrane protein 2, 22kDa [Source:HGNC Symbol;Acc:9716]	-1.44695	3.02655	74.048	7.62414e-18	8.98218e-17
ENSG00000238261	BX004987.5		1.54234	2.3484	74.0195	7.73478e-18	9.10528e-17
ENSG00000164715	LMTK2	lemur tyrosine kinase 2 [Source:HGNC Symbol;Acc:17880]	0.739713	5.5379	73.902	8.20927e-18	9.65616e-17
ENSG00000136938	ANP32B	acidic (leucine-rich) nuclear phosphoprotein 32 family, member B [Source:HGNC Symbol;Acc:16677]	-0.54035	7.87851	73.8726	8.33263e-18	9.79349e-17
ENSG00000137968	SLC44A5	solute carrier family 44, member 5 [Source:HGNC Symbol;Acc:28524]	0.802884	5.3991	73.8592	8.38944e-18	9.85243e-17
ENSG00000146733	PSPH	phosphoserine phosphatase [Source:HGNC Symbol;Acc:9577]	0.810704	5.2794	73.8439	8.45431e-18	9.92076e-17
ENSG00000159217	IGF2BP1	insulin-like growth factor 2 mRNA binding protein 1 [Source:HGNC Symbol;Acc:28866]	-0.458867	9.46896	73.7839	8.7156e-18	1.02193e-16
ENSG00000151835	SACS	spastic ataxia of Charlevoix-Saguenay (sacsin) [Source:HGNC Symbol;Acc:10519]	0.465608	8.93298	73.7559	8.84009e-18	1.0357e-16
ENSG00000148356	LRSAM1	leucine rich repeat and sterile alpha motif containing 1 [Source:HGNC Symbol;Acc:25135]	1.12738	3.76146	73.7512	8.86104e-18	1.03734e-16
ENSG00000145147	SLIT2	slit homolog 2 (Drosophila) [Source:HGNC Symbol;Acc:11086]	0.961862	4.25735	73.6982	9.1021e-18	1.06472e-16
ENSG00000158711	ELK4	ELK4, ETS-domain protein (SRF accessory protein 1) [Source:HGNC Symbol;Acc:3326]	0.627632	6.44003	73.641	9.36958e-18	1.09514e-16
ENSG00000213923	CSNK1E	casein kinase 1, epsilon [Source:HGNC Symbol;Acc:2453]	0.705106	7.45797	73.597	9.58114e-18	1.11898e-16
ENSG00000006576	PHTF2	putative homeodomain transcription factor 2 [Source:HGNC Symbol;Acc:13411]	-0.657346	6.54146	73.5489	9.8175e-18	1.14568e-16
ENSG00000234456	MAGI2-AS3	MAGI2 antisense RNA 3 [Source:HGNC Symbol;Acc:40862]	-0.65213	7.07971	73.5449	9.8372e-18	1.14708e-16
ENSG00000236780	AC078941.1		-1.17859	3.5945	73.5401	9.86112e-18	1.14896e-16
ENSG00000198837	DENND4B	DENN/MADD domain containing 4B [Source:HGNC Symbol;Acc:29044]	0.707897	7.42695	73.4116	1.05248e-17	1.22533e-16
ENSG00000177570	SAMD12	sterile alpha motif domain containing 12 [Source:HGNC Symbol;Acc:31750]	1.25151	3.47363	73.3137	1.10596e-17	1.28658e-16
ENSG00000148229	POLE3	polymerase (DNA directed), epsilon 3, accessory subunit [Source:HGNC Symbol;Acc:13546]	-0.503261	7.92002	73.2602	1.13639e-17	1.32094e-16
ENSG00000105642	KCNN1	potassium intermediate/small conductance calcium-activated channel, subfamily N, member 1 [Source:HGNC Symbol;Acc:6290]	1.32456	3.4596	73.2373	1.14963e-17	1.33528e-16
ENSG00000091622	PITPNM3	PITPNM family member 3 [Source:HGNC Symbol;Acc:21043]	-2.4179	1.02396	73.1437	1.20544e-17	1.39901e-16
ENSG00000132334	PTPRE	protein tyrosine phosphatase, receptor type, E [Source:HGNC Symbol;Acc:9669]	3.05164	0.247745	73.0758	1.24766e-17	1.44688e-16
ENSG00000163820	FYCO1	FYVE and coiled-coil domain containing 1 [Source:HGNC Symbol;Acc:14673]	0.913755	4.65734	73.0314	1.27601e-17	1.47859e-16
ENSG00000183496	MEX3B	mex-3 homolog B (C. elegans) [Source:HGNC Symbol;Acc:25297]	0.647356	6.03442	72.9169	1.35225e-17	1.56571e-16
ENSG00000197905	TEAD4	TEA domain family member 4 [Source:HGNC Symbol;Acc:11717]	-1.41458	3.10787	72.7026	1.50735e-17	1.74315e-16
ENSG00000127511	SIN3B	SIN3 transcription regulator homolog B (yeast) [Source:HGNC Symbol;Acc:19354]	0.828916	5.40212	72.7019	1.50785e-17	1.74315e-16
ENSG00000067842	ATP2B3	ATPase, Ca++ transporting, plasma membrane 3 [Source:HGNC Symbol;Acc:816]	-0.98728	4.71796	72.6918	1.51561e-17	1.75075e-16
ENSG00000180011	ZADH2	zinc binding alcohol dehydrogenase domain containing 2 [Source:HGNC Symbol;Acc:28697]	0.688316	5.89813	72.5421	1.63508e-17	1.88729e-16
ENSG00000154646	TMPRSS15	transmembrane protease, serine 15 [Source:HGNC Symbol;Acc:9490]	0.60382	6.645	72.4449	1.71765e-17	1.98105e-16
ENSG00000206532	RP11-553A10.1	Uncharacterized protein [Source:UniProtKB/TrEMBL;Acc:H7C4H0]	5.08303	-0.93238	72.4045	1.75317e-17	2.02045e-16
ENSG00000138182	KIF20B	kinesin family member 20B [Source:HGNC Symbol;Acc:7212]	-0.604191	7.11313	72.4006	1.75659e-17	2.02281e-16
ENSG00000154370	TRIM11	tripartite motif containing 11 [Source:HGNC Symbol;Acc:16281]	0.882106	4.95254	72.379	1.7759e-17	2.04346e-16
ENSG00000111554	MDM1	Mdm1 nuclear protein homolog (mouse) [Source:HGNC Symbol;Acc:29917]	-0.736951	5.67569	72.2092	1.93554e-17	2.22542e-16
ENSG00000145075	CCDC39	coiled-coil domain containing 39 [Source:HGNC Symbol;Acc:25244]	1.10147	3.96965	72.1369	2.00775e-17	2.30665e-16
ENSG00000075131	TIPIN	TIMELESS interacting protein [Source:HGNC Symbol;Acc:30750]	-0.799197	5.45851	71.961	2.19497e-17	2.51979e-16
ENSG00000133884	DPF2	D4, zinc and double PHD fingers family 2 [Source:HGNC Symbol;Acc:9964]	0.670174	6.26025	71.9519	2.20509e-17	2.52944e-16
ENSG00000152969	JAKMIP1	janus kinase and microtubule interacting protein 1 [Source:HGNC Symbol;Acc:26460]	-1.37595	3.23208	71.8875	2.27817e-17	2.61126e-16
ENSG00000180336	C17orf104	chromosome 17 open reading frame 104 [Source:HGNC Symbol;Acc:26670]	1.48767	2.87818	71.8723	2.29582e-17	2.62945e-16
ENSG00000156299	TIAM1	T-cell lymphoma invasion and metastasis 1 [Source:HGNC Symbol;Acc:11805]	-0.690518	5.96988	71.8637	2.30584e-17	2.63889e-16
ENSG00000152332	UHMK1	U2AF homology motif (UHM) kinase 1 [Source:HGNC Symbol;Acc:19683]	0.526141	8.27641	71.8053	2.37515e-17	2.71611e-16
ENSG00000196155	PLEKHG4	pleckstrin homology domain containing, family G (with RhoGef domain) member 4 [Source:HGNC Symbol;Acc:24501]	-1.04215	4.26051	71.7939	2.38892e-17	2.72975e-16
ENSG00000255310	AF131215.2		1.2392	3.29397	71.7692	2.41896e-17	2.76194e-16
ENSG00000077235	GTF3C1	general transcription factor IIIC, polypeptide 1, alpha 220kDa [Source:HGNC Symbol;Acc:4664]	0.556801	7.46161	71.7569	2.43409e-17	2.77708e-16
ENSG00000259787	CTB-85P21.2		2.95936	0.96153	71.6946	2.51221e-17	2.86399e-16
ENSG00000119335	SET	SET nuclear oncogene [Source:HGNC Symbol;Acc:10760]	-0.449173	9.77604	71.6733	2.53951e-17	2.89289e-16
ENSG00000180357	ZNF609	zinc finger protein 609 [Source:HGNC Symbol;Acc:29003]	0.553293	7.2592	71.6524	2.56647e-17	2.92067e-16
ENSG00000111358	GTF2H3	general transcription factor IIH, polypeptide 3, 34kDa [Source:HGNC Symbol;Acc:4657]	-0.738626	5.73994	71.6514	2.56784e-17	2.92067e-16
ENSG00000140575	IQGAP1	IQ motif containing GTPase activating protein 1 [Source:HGNC Symbol;Acc:6110]	-0.509801	7.78211	71.5742	2.6702e-17	3.03477e-16
ENSG00000181163	NPM1	nucleophosmin (nucleolar phosphoprotein B23, numatrin) [Source:HGNC Symbol;Acc:7910]	-0.418773	11.0659	71.5636	2.68461e-17	3.04881e-16
ENSG00000212719	C17orf51	chromosome 17 open reading frame 51 [Source:HGNC Symbol;Acc:27904]	0.699216	5.74479	71.5226	2.74105e-17	3.11052e-16
ENSG00000117280	RAB7L1	RAB7, member RAS oncogene family-like 1 [Source:HGNC Symbol;Acc:9789]	0.674776	6.03131	71.4387	2.86013e-17	3.24316e-16
ENSG00000185800	DMWD	dystrophia myotonica, WD repeat containing [Source:HGNC Symbol;Acc:2936]	1.15487	4.35583	71.3854	2.93832e-17	3.32928e-16
ENSG00000235655	H3F3AP4	H3 histone, family 3A, pseudogene 4 [Source:HGNC Symbol;Acc:42980]	-0.630227	6.15515	71.3725	2.95769e-17	3.34865e-16
ENSG00000235609	AF127936.7		1.31888	2.96909	71.3336	3.01654e-17	3.41268e-16
ENSG00000154553	PDLIM3	PDZ and LIM domain 3 [Source:HGNC Symbol;Acc:20767]	1.07944	4.04626	71.221	3.19372e-17	3.61037e-16
ENSG00000137040	RANBP6	RAN binding protein 6 [Source:HGNC Symbol;Acc:9851]	0.524313	7.54257	71.1002	3.39527e-17	3.83528e-16
ENSG00000172915	NBEA	neurobeachin [Source:HGNC Symbol;Acc:7648]	-0.5193	7.66039	71.0469	3.48833e-17	3.9374e-16
ENSG00000007392	LUC7L	LUC7-like (S. cerevisiae) [Source:HGNC Symbol;Acc:6723]	0.641734	6.77266	71.0056	3.56218e-17	4.01769e-16
ENSG00000100678	SLC8A3	solute carrier family 8 (sodium/calcium exchanger), member 3 [Source:HGNC Symbol;Acc:11070]	2.52164	1.61119	70.999	3.57399e-17	4.02795e-16
ENSG00000205302	SNX2	sorting nexin 2 [Source:HGNC Symbol;Acc:11173]	0.597183	6.61264	70.9929	3.58505e-17	4.03734e-16
ENSG00000148200	NR6A1	nuclear receptor subfamily 6, group A, member 1 [Source:HGNC Symbol;Acc:7985]	1.20695	3.37505	70.9627	3.64045e-17	4.09662e-16
ENSG00000152582	SPEF2	sperm flagellar 2 [Source:HGNC Symbol;Acc:26293]	-1.24117	3.3026	70.907	3.74467e-17	4.21069e-16
ENSG00000076108	BAZ2A	bromodomain adjacent to zinc finger domain, 2A [Source:HGNC Symbol;Acc:962]	0.568257	7.42208	70.6899	4.18022e-17	4.69688e-16
ENSG00000132688	NES	nestin [Source:HGNC Symbol;Acc:7756]	-0.48251	8.37264	70.6724	4.21762e-17	4.73531e-16
ENSG00000117054	ACADM	acyl-CoA dehydrogenase, C-4 to C-12 straight chain [Source:HGNC Symbol;Acc:89]	-0.529048	7.60457	70.6546	4.2558e-17	4.77455e-16
ENSG00000035928	RFC1	replication factor C (activator 1) 1, 145kDa [Source:HGNC Symbol;Acc:9969]	-0.521728	7.51403	70.6407	4.28574e-17	4.80451e-16
ENSG00000186866	POFUT2	protein O-fucosyltransferase 2 [Source:HGNC Symbol;Acc:14683]	0.993541	4.24865	70.6204	4.33008e-17	4.85054e-16
ENSG00000058600	POLR3E	polymerase (RNA) III (DNA directed) polypeptide E (80kD) [Source:HGNC Symbol;Acc:30347]	0.720084	5.83794	70.5735	4.43437e-17	4.96361e-16
ENSG00000029153	ARNTL2	aryl hydrocarbon receptor nuclear translocator-like 2 [Source:HGNC Symbol;Acc:18984]	-1.29061	3.69311	70.5611	4.46228e-17	4.99108e-16
ENSG00000183762	KREMEN1	kringle containing transmembrane protein 1 [Source:HGNC Symbol;Acc:17550]	-0.516659	7.88488	70.5208	4.55443e-17	5.09031e-16
ENSG00000204386	NEU1	sialidase 1 (lysosomal sialidase) [Source:HGNC Symbol;Acc:7758]	0.85296	5.22442	70.4608	4.6951e-17	5.24356e-16
ENSG00000163017	ACTG2	actin, gamma 2, smooth muscle, enteric [Source:HGNC Symbol;Acc:145]	3.04877	0.168185	70.3584	4.94528e-17	5.51881e-16
ENSG00000180354	C7orf41	chromosome 7 open reading frame 41 [Source:HGNC Symbol;Acc:25457]	-0.801317	5.14443	70.3444	4.98052e-17	5.55395e-16
ENSG00000070601	FRMPD1	FERM and PDZ domain containing 1 [Source:HGNC Symbol;Acc:29159]	-2.16842	1.37505	70.2988	5.09676e-17	5.6793e-16
ENSG00000064666	CNN2	calponin 2 [Source:HGNC Symbol;Acc:2156]	0.798009	5.31849	70.243	5.2431e-17	5.83797e-16
ENSG00000197530	MIB2	mindbomb E3 ubiquitin protein ligase 2 [Source:HGNC Symbol;Acc:30577]	1.86662	2.53911	70.1092	5.61109e-17	6.24303e-16
ENSG00000198026	ZNF335	zinc finger protein 335 [Source:HGNC Symbol;Acc:15807]	1.05492	4.27838	70.0465	5.79217e-17	6.43719e-16
ENSG00000256087	ZNF432	zinc finger protein 432 [Source:HGNC Symbol;Acc:20810]	0.872083	4.74529	70.0458	5.7943e-17	6.43719e-16
ENSG00000143252	SDHC	succinate dehydrogenase complex, subunit C, integral membrane protein, 15kDa [Source:HGNC Symbol;Acc:10682]	-0.520953	7.3406	70.0374	5.81907e-17	6.45987e-16
ENSG00000124228	DDX27	DEAD (Asp-Glu-Ala-Asp) box polypeptide 27 [Source:HGNC Symbol;Acc:15837]	0.59453	6.47305	69.9592	6.05451e-17	6.7162e-16
ENSG00000178917	ZNF852	zinc finger protein 852 [Source:HGNC Symbol;Acc:27713]	1.12902	4.18563	69.9146	6.19286e-17	6.86453e-16
ENSG00000185033	SEMA4B	sema domain, immunoglobulin domain (Ig), transmembrane domain (TM) and short cytoplasmic domain, (semaphorin) 4B [Source:HGNC Symbol;Acc:10730]	1.15562	3.77454	69.9096	6.20855e-17	6.87677e-16
ENSG00000135541	AHI1	Abelson helper integration site 1 [Source:HGNC Symbol;Acc:21575]	-0.820736	5.31025	69.899	6.24188e-17	6.90852e-16
ENSG00000073910	FRY	furry homolog (Drosophila) [Source:HGNC Symbol;Acc:20367]	-1.45193	2.40928	69.8074	6.53878e-17	7.23172e-16
ENSG00000225210	AL589743.1		0.819224	5.44036	69.8021	6.55636e-17	7.24575e-16
ENSG00000175792	RUVBL1	RuvB-like 1 (E. coli) [Source:HGNC Symbol;Acc:10474]	-0.542063	7.23387	69.7337	6.78763e-17	7.49575e-16
ENSG00000113318	MSH3	mutS homolog 3 (E. coli) [Source:HGNC Symbol;Acc:7326]	-0.79374	5.27245	69.7081	6.87646e-17	7.58819e-16
ENSG00000123933	MXD4	MAX dimerization protein 4 [Source:HGNC Symbol;Acc:13906]	0.890556	5.63751	69.6865	6.95217e-17	7.66602e-16
ENSG00000116285	ERRFI1	ERBB receptor feedback inhibitor 1 [Source:HGNC Symbol;Acc:18185]	1.00643	4.08799	69.6478	7.08975e-17	7.81191e-16
ENSG00000128059	PPAT	phosphoribosyl pyrophosphate amidotransferase [Source:HGNC Symbol;Acc:9238]	-0.573199	7.3725	69.6112	7.22272e-17	7.95251e-16
ENSG00000232430	AC105396.3		5.50604	-0.838432	69.5953	7.28108e-17	8.01081e-16
ENSG00000170396	ZNF804A	zinc finger protein 804A [Source:HGNC Symbol;Acc:21711]	-0.739135	5.33903	69.5715	7.36933e-17	8.10188e-16
ENSG00000172053	QARS	glutaminyl-tRNA synthetase [Source:HGNC Symbol;Acc:9751]	-0.570553	7.13925	69.5313	7.52107e-17	8.26258e-16
ENSG00000243649	CFB	complement factor B [Source:HGNC Symbol;Acc:1037]	5.52463	-0.837386	69.4753	7.73757e-17	8.49412e-16
ENSG00000130508	PXDN	peroxidasin homolog (Drosophila) [Source:HGNC Symbol;Acc:14966]	0.903618	4.8322	69.4446	7.85903e-17	8.62106e-16
ENSG00000084636	COL16A1	collagen, type XVI, alpha 1 [Source:HGNC Symbol;Acc:2193]	-1.50815	3.56854	69.3923	8.07014e-17	8.84609e-16
ENSG00000180573	HIST1H2AC	histone cluster 1, H2ac [Source:HGNC Symbol;Acc:4733]	1.30617	3.24426	69.3901	8.07913e-17	8.84939e-16
ENSG00000128567	PODXL	podocalyxin-like [Source:HGNC Symbol;Acc:9171]	1.24332	3.64987	69.3879	8.08826e-17	8.85285e-16
ENSG00000006634	DBF4	DBF4 homolog (S. cerevisiae) [Source:HGNC Symbol;Acc:17364]	-0.670128	6.14572	69.3207	8.36846e-17	9.15277e-16
ENSG00000148541	FAM13C	family with sequence similarity 13, member C [Source:HGNC Symbol;Acc:19371]	1.46917	2.73449	69.3116	8.40747e-17	9.18865e-16
ENSG00000120278	PLEKHG1	pleckstrin homology domain containing, family G (with RhoGef domain) member 1 [Source:HGNC Symbol;Acc:20884]	2.03978	1.53594	69.2708	8.583e-17	9.37357e-16
ENSG00000175137	SH3BP5L	SH3-binding domain protein 5-like [Source:HGNC Symbol;Acc:29360]	0.816653	5.48561	69.2635	8.61508e-17	9.40167e-16
ENSG00000249014	HMGN2P4	high mobility group nucleosomal binding domain 2 pseudogene 4 [Source:HGNC Symbol;Acc:33567]	-1.36963	3.07034	69.0414	9.64171e-17	1.05143e-15
ENSG00000082512	TRAF5	TNF receptor-associated factor 5 [Source:HGNC Symbol;Acc:12035]	0.639195	5.95965	69.0147	9.77345e-17	1.06501e-15
ENSG00000139278	GLIPR1	GLI pathogenesis-related 1 [Source:HGNC Symbol;Acc:17001]	1.74618	1.93256	69.0014	9.83928e-17	1.0714e-15
ENSG00000183775	KCTD16	potassium channel tetramerisation domain containing 16 [Source:HGNC Symbol;Acc:29244]	2.1256	1.68208	68.9983	9.85467e-17	1.07228e-15
ENSG00000162642	C1orf52	chromosome 1 open reading frame 52 [Source:HGNC Symbol;Acc:24871]	0.681709	5.97759	68.9806	9.94352e-17	1.08116e-15
ENSG00000174718	KIAA1551	KIAA1551 [Source:HGNC Symbol;Acc:25559]	-0.670532	5.97646	68.9146	1.0282e-16	1.11714e-15
ENSG00000117143	UAP1	UDP-N-acteylglucosamine pyrophosphorylase 1 [Source:HGNC Symbol;Acc:12457]	-0.528249	7.52132	68.9051	1.03318e-16	1.12172e-15
ENSG00000152484	USP12	ubiquitin specific peptidase 12 [Source:HGNC Symbol;Acc:20485]	-0.695747	5.67269	68.8974	1.03724e-16	1.12531e-15
ENSG00000173376	NDNF	neuron-derived neurotrophic factor [Source:HGNC Symbol;Acc:26256]	-0.825498	4.95414	68.7524	1.11635e-16	1.21025e-15
ENSG00000165197	FIGF	c-fos induced growth factor (vascular endothelial growth factor D) [Source:HGNC Symbol;Acc:3708]	-1.7889	2.11982	68.7288	1.12979e-16	1.22392e-15
ENSG00000081051	AFP	alpha-fetoprotein [Source:HGNC Symbol;Acc:317]	5.41734	-0.139603	68.7198	1.13493e-16	1.22859e-15
ENSG00000164484	TMEM200A	transmembrane protein 200A [Source:HGNC Symbol;Acc:21075]	1.07121	4.18997	68.7169	1.13662e-16	1.22953e-15
ENSG00000198961	PJA2	praja ring finger 2, E3 ubiquitin protein ligase [Source:HGNC Symbol;Acc:17481]	-0.520012	7.31153	68.6589	1.17055e-16	1.2653e-15
ENSG00000162645	GBP2	guanylate binding protein 2, interferon-inducible [Source:HGNC Symbol;Acc:4183]	2.80147	0.929578	68.6482	1.1769e-16	1.27124e-15
ENSG00000233276	GPX1	glutathione peroxidase 1 [Source:HGNC Symbol;Acc:4553]	0.861226	5.70445	68.6124	1.19848e-16	1.29276e-15
ENSG00000105327	BBC3	BCL2 binding component 3 [Source:HGNC Symbol;Acc:17868]	1.7533	1.88666	68.6123	1.19857e-16	1.29276e-15
ENSG00000134256	CD101	CD101 molecule [Source:HGNC Symbol;Acc:5949]	2.16514	1.31382	68.6044	1.20338e-16	1.29701e-15
ENSG00000140153	WDR20	WD repeat domain 20 [Source:HGNC Symbol;Acc:19667]	0.847802	4.93398	68.602	1.2048e-16	1.2976e-15
ENSG00000172270	BSG	basigin (Ok blood group) [Source:HGNC Symbol;Acc:1116]	0.689135	7.42588	68.5992	1.20652e-16	1.2985e-15
ENSG00000127804	METTL16	methyltransferase like 16 [Source:HGNC Symbol;Acc:28484]	0.57921	6.54713	68.5809	1.21777e-16	1.30966e-15
ENSG00000141458	NPC1	Niemann-Pick disease, type C1 [Source:HGNC Symbol;Acc:7897]	0.79888	5.08393	68.5421	1.24199e-16	1.33474e-15
ENSG00000188070	C11orf95	chromosome 11 open reading frame 95 [Source:HGNC Symbol;Acc:28449]	0.606653	6.43017	68.4566	1.29704e-16	1.39288e-15
ENSG00000003096	KLHL13	kelch-like 13 (Drosophila) [Source:HGNC Symbol;Acc:22931]	0.638707	6.21985	68.4473	1.30312e-16	1.3984e-15
ENSG00000175229	GAL3ST3	galactose-3-O-sulfotransferase 3 [Source:HGNC Symbol;Acc:24144]	2.12941	1.74756	68.3917	1.34039e-16	1.43735e-15
ENSG00000108821	COL1A1	collagen, type I, alpha 1 [Source:HGNC Symbol;Acc:2197]	1.0919	5.20488	68.369	1.35595e-16	1.45298e-15
ENSG00000103021	CCDC113	coiled-coil domain containing 113 [Source:HGNC Symbol;Acc:25002]	-1.2173	3.59038	68.353	1.36698e-16	1.46374e-15
ENSG00000100968	NFATC4	nuclear factor of activated T-cells, cytoplasmic, calcineurin-dependent 4 [Source:HGNC Symbol;Acc:7778]	0.876698	5.33503	68.2004	1.47697e-16	1.58038e-15
ENSG00000005448	WDR54	WD repeat domain 54 [Source:HGNC Symbol;Acc:25770]	-1.14191	3.91543	68.1524	1.51333e-16	1.61811e-15
ENSG00000005189	AC004381.6	Putative RNA exonuclease NEF-sp [Source:UniProtKB/Swiss-Prot;Acc:Q96IC2]	-1.41117	2.75548	68.1388	1.52386e-16	1.6282e-15
ENSG00000143469	SYT14	synaptotagmin XIV [Source:HGNC Symbol;Acc:23143]	0.756743	5.39585	68.1184	1.53964e-16	1.64387e-15
ENSG00000028528	SNX1	sorting nexin 1 [Source:HGNC Symbol;Acc:11172]	0.486669	7.54005	68.1131	1.54378e-16	1.64711e-15
ENSG00000142197	DOPEY2	dopey family member 2 [Source:HGNC Symbol;Acc:1291]	-1.12042	3.57869	68.1101	1.54618e-16	1.64848e-15
ENSG00000186918	ZNF395	zinc finger protein 395 [Source:HGNC Symbol;Acc:18737]	-0.857948	4.55724	68.1067	1.54882e-16	1.6501e-15
ENSG00000234297	RP11-54D18.4		-1.33093	2.86745	68.0657	1.58139e-16	1.6836e-15
ENSG00000101972	STAG2	stromal antigen 2 [Source:HGNC Symbol;Acc:11355]	-0.503951	7.74251	68.0331	1.6077e-16	1.71038e-15
ENSG00000142733	MAP3K6	mitogen-activated protein kinase kinase kinase 6 [Source:HGNC Symbol;Acc:6858]	-1.74704	2.14448	68.0263	1.61327e-16	1.71507e-15
ENSG00000175911	AC127496.1	Uncharacterized protein [Source:UniProtKB/TrEMBL;Acc:Q9HBN7]	1.7111	2.06508	67.9522	1.67509e-16	1.77951e-15
ENSG00000187862	TTC24	tetratricopeptide repeat domain 24 [Source:HGNC Symbol;Acc:32348]	3.48752	0.054182	67.9483	1.67839e-16	1.7798e-15
ENSG00000130513	GDF15	growth differentiation factor 15 [Source:HGNC Symbol;Acc:30142]	3.97708	-0.53159	67.9478	1.67879e-16	1.7798e-15
ENSG00000112182	BACH2	BTB and CNC homology 1, basic leucine zipper transcription factor 2 [Source:HGNC Symbol;Acc:14078]	1.89104	1.76112	67.9476	1.67897e-16	1.7798e-15
ENSG00000147421	HMBOX1	homeobox containing 1 [Source:HGNC Symbol;Acc:26137]	0.862513	4.85395	67.9047	1.71592e-16	1.81767e-15
ENSG00000112096	SOD2	superoxide dismutase 2, mitochondrial [Source:HGNC Symbol;Acc:11180]	-0.523112	7.25271	67.8724	1.74423e-16	1.84634e-15
ENSG00000163618	CADPS	Ca++-dependent secretion activator [Source:HGNC Symbol;Acc:1426]	1.02847	4.13886	67.8592	1.75596e-16	1.85743e-15
ENSG00000168096	ANKS3	ankyrin repeat and sterile alpha motif domain containing 3 [Source:HGNC Symbol;Acc:29422]	1.15389	3.37805	67.821	1.79028e-16	1.89238e-15
ENSG00000067445	TRO	trophinin [Source:HGNC Symbol;Acc:12326]	0.67068	6.21521	67.8011	1.80849e-16	1.91027e-15
ENSG00000171105	INSR	insulin receptor [Source:HGNC Symbol;Acc:6091]	-0.973513	4.06072	67.7956	1.81355e-16	1.91425e-15
ENSG00000109107	ALDOC	aldolase C, fructose-bisphosphate [Source:HGNC Symbol;Acc:418]	-1.36191	2.99906	67.793	1.81597e-16	1.91544e-15
ENSG00000116141	MARK1	MAP/microtubule affinity-regulating kinase 1 [Source:HGNC Symbol;Acc:6896]	-0.632688	6.07275	67.7365	1.86868e-16	1.96963e-15
ENSG00000137710	RDX	radixin [Source:HGNC Symbol;Acc:9944]	-0.574497	6.56239	67.591	2.01179e-16	2.11897e-15
ENSG00000068323	TFE3	transcription factor binding to IGHM enhancer 3 [Source:HGNC Symbol;Acc:11752]	0.931874	4.61745	67.4786	2.12982e-16	2.24168e-15
ENSG00000105928	DFNA5	deafness, autosomal dominant 5 [Source:HGNC Symbol;Acc:2810]	-1.12503	3.54032	67.4072	2.20842e-16	2.32276e-15
ENSG00000196235	SUPT5H	suppressor of Ty 5 homolog (S. cerevisiae) [Source:HGNC Symbol;Acc:11469]	0.653481	6.99175	67.3803	2.23879e-16	2.35304e-15
ENSG00000158850	B4GALT3	UDP-Gal:betaGlcNAc beta 1,4- galactosyltransferase, polypeptide 3 [Source:HGNC Symbol;Acc:926]	0.67749	6.22177	67.3648	2.2564e-16	2.36986e-15
ENSG00000112992	NNT	nicotinamide nucleotide transhydrogenase [Source:HGNC Symbol;Acc:7863]	-0.543938	6.83324	67.3606	2.26122e-16	2.37324e-15
ENSG00000113739	STC2	stanniocalcin 2 [Source:HGNC Symbol;Acc:11374]	2.76995	0.770133	67.3223	2.30562e-16	2.41812e-15
ENSG00000100604	CHGA	chromogranin A (parathyroid secretory protein 1) [Source:HGNC Symbol;Acc:1929]	-0.709063	6.01074	67.2757	2.36074e-16	2.47418e-15
ENSG00000168488	ATXN2L	ataxin 2-like [Source:HGNC Symbol;Acc:31326]	0.720334	7.1776	67.2532	2.38789e-16	2.50087e-15
ENSG00000148343	FAM73B	family with sequence similarity 73, member B [Source:HGNC Symbol;Acc:23621]	1.08549	4.22416	67.1715	2.48885e-16	2.60476e-15
ENSG00000221829	FANCG	Fanconi anemia, complementation group G [Source:HGNC Symbol;Acc:3588]	-0.875899	5.20086	67.1687	2.49239e-16	2.60663e-15
ENSG00000152291	TGOLN2	trans-golgi network protein 2 [Source:HGNC Symbol;Acc:15450]	0.494184	7.70734	67.1224	2.55164e-16	2.66671e-15
ENSG00000075218	GTSE1	G-2 and S-phase expressed 1 [Source:HGNC Symbol;Acc:13698]	-0.687121	5.92464	67.1034	2.57635e-16	2.69063e-15
ENSG00000146216	TTBK1	tau tubulin kinase 1 [Source:HGNC Symbol;Acc:19140]	2.21479	0.901093	67.0899	2.59398e-16	2.70714e-15
ENSG00000116044	NFE2L2	nuclear factor (erythroid-derived 2)-like 2 [Source:HGNC Symbol;Acc:7782]	-0.530708	7.30012	67.0685	2.6224e-16	2.73486e-15
ENSG00000184678	HIST2H2BE	histone cluster 2, H2be [Source:HGNC Symbol;Acc:4760]	0.993808	4.63499	67.0186	2.68955e-16	2.80292e-15
ENSG00000138400	MDH1B	malate dehydrogenase 1B, NAD (soluble) [Source:HGNC Symbol;Acc:17836]	-2.09606	1.77261	66.971	2.75537e-16	2.8695e-15
ENSG00000171570	EGLN2	egl nine homolog 2 (C. elegans) [Source:HGNC Symbol;Acc:14660]	0.975454	5.28413	66.9582	2.77332e-16	2.88616e-15
ENSG00000089685	BIRC5	baculoviral IAP repeat containing 5 [Source:HGNC Symbol;Acc:593]	-0.476848	7.70549	66.9462	2.79023e-16	2.90172e-15
ENSG00000119669	IRF2BPL	interferon regulatory factor 2 binding protein-like [Source:HGNC Symbol;Acc:14282]	0.951404	4.47995	66.7928	3.01598e-16	3.1343e-15
ENSG00000198755	RPL10A	ribosomal protein L10a [Source:HGNC Symbol;Acc:10299]	-0.449509	8.96272	66.7493	3.08329e-16	3.20199e-15
ENSG00000183864	TOB2	transducer of ERBB2, 2 [Source:HGNC Symbol;Acc:11980]	0.66949	6.26519	66.6876	3.18128e-16	3.30144e-15
ENSG00000127337	YEATS4	YEATS domain containing 4 [Source:HGNC Symbol;Acc:24859]	-0.754006	5.81852	66.6496	3.24325e-16	3.3634e-15
ENSG00000130638	ATXN10	ataxin 10 [Source:HGNC Symbol;Acc:10549]	-0.499405	8.08454	66.6136	3.30292e-16	3.42281e-15
ENSG00000100068	LRP5L	low density lipoprotein receptor-related protein 5-like [Source:HGNC Symbol;Acc:25323]	1.46942	2.42547	66.6123	3.30516e-16	3.42281e-15
ENSG00000143183	TMCO1	transmembrane and coiled-coil domains 1 [Source:HGNC Symbol;Acc:18188]	0.479062	8.20923	66.6094	3.31001e-16	3.42543e-15
ENSG00000049541	RFC2	replication factor C (activator 1) 2, 40kDa [Source:HGNC Symbol;Acc:9970]	-0.76417	5.30932	66.5738	3.3704e-16	3.4855e-15
ENSG00000143126	CELSR2	cadherin, EGF LAG seven-pass G-type receptor 2 (flamingo homolog, Drosophila) [Source:HGNC Symbol;Acc:3231]	0.676497	6.84239	66.5638	3.38744e-16	3.50066e-15
ENSG00000032444	PNPLA6	patatin-like phospholipase domain containing 6 [Source:HGNC Symbol;Acc:16268]	1.3783	3.39335	66.5625	3.38979e-16	3.50066e-15
ENSG00000204650	AC126544.2		0.74549	5.43915	66.5547	3.40309e-16	3.51194e-15
ENSG00000131323	TRAF3	TNF receptor-associated factor 3 [Source:HGNC Symbol;Acc:12033]	-0.717088	5.48545	66.55	3.41123e-16	3.51789e-15
ENSG00000064655	EYA2	eyes absent homolog 2 (Drosophila) [Source:HGNC Symbol;Acc:3520]	-0.691794	5.81355	66.4526	3.58416e-16	3.69366e-15
ENSG00000167657	DAPK3	death-associated protein kinase 3 [Source:HGNC Symbol;Acc:2676]	1.14741	4.48266	66.4291	3.62703e-16	3.73523e-15
ENSG00000175198	PCCA	propionyl CoA carboxylase, alpha polypeptide [Source:HGNC Symbol;Acc:8653]	-0.920427	4.47736	66.4156	3.65203e-16	3.75837e-15
ENSG00000163535	SGOL2	shugoshin-like 2 (S. pombe) [Source:HGNC Symbol;Acc:30812]	-0.600204	6.46754	66.409	3.66428e-16	3.76836e-15
ENSG00000169733	RFNG	RFNG O-fucosylpeptide 3-beta-N-acetylglucosaminyltransferase [Source:HGNC Symbol;Acc:9974]	1.21697	3.59375	66.3058	3.86115e-16	3.96807e-15
ENSG00000168268	NT5DC2	5'-nucleotidase domain containing 2 [Source:HGNC Symbol;Acc:25717]	-0.628843	7.59011	66.2935	3.88535e-16	3.99016e-15
ENSG00000188818	ZDHHC11	zinc finger, DHHC-type containing 11 [Source:HGNC Symbol;Acc:19158]	1.28186	3.23135	66.2053	4.0631e-16	4.16982e-15
ENSG00000173875	ZNF791	zinc finger protein 791 [Source:HGNC Symbol;Acc:26895]	0.701891	5.42687	66.1479	4.18329e-16	4.29019e-15
ENSG00000137504	CREBZF	CREB/ATF bZIP transcription factor [Source:HGNC Symbol;Acc:24905]	0.502732	7.83627	66.1089	4.26687e-16	4.37288e-15
ENSG00000165152	TMEM246	transmembrane protein 246 [Source:HGNC Symbol;Acc:28180]	-0.671921	5.82353	66.1057	4.27374e-16	4.37689e-15
ENSG00000013583	HEBP1	heme binding protein 1 [Source:HGNC Symbol;Acc:17176]	-1.40766	2.81547	66.0546	4.38603e-16	4.48879e-15
ENSG00000111642	CHD4	chromodomain helicase DNA binding protein 4 [Source:HGNC Symbol;Acc:1919]	-0.48024	8.88502	65.9752	4.56639e-16	4.67014e-15
ENSG00000100532	CGRRF1	cell growth regulator with ring finger domain 1 [Source:HGNC Symbol;Acc:15528]	0.965977	4.34127	65.928	4.67704e-16	4.78001e-15
ENSG00000125534	PPDPF	pancreatic progenitor cell differentiation and proliferation factor homolog (zebrafish) [Source:HGNC Symbol;Acc:16142]	-1.29173	3.327	65.885	4.78025e-16	4.88211e-15
ENSG00000004478	FKBP4	FK506 binding protein 4, 59kDa [Source:HGNC Symbol;Acc:3720]	0.533778	8.06507	65.8771	4.79946e-16	4.89836e-15
ENSG00000215397	SCRT2	scratch homolog 2, zinc finger protein (Drosophila) [Source:HGNC Symbol;Acc:15952]	1.95003	2.03776	65.8292	4.91747e-16	5.01534e-15
ENSG00000142230	SAE1	SUMO1 activating enzyme subunit 1 [Source:HGNC Symbol;Acc:30660]	-0.476175	7.96961	65.8109	4.96339e-16	5.05869e-15
ENSG00000155096	AZIN1	antizyme inhibitor 1 [Source:HGNC Symbol;Acc:16432]	-0.526692	8.34167	65.7751	5.05429e-16	5.1478e-15
ENSG00000131504	DIAPH1	diaphanous homolog 1 (Drosophila) [Source:HGNC Symbol;Acc:2876]	-0.49361	7.45629	65.7538	5.10917e-16	5.20011e-15
ENSG00000135655	USP15	ubiquitin specific peptidase 15 [Source:HGNC Symbol;Acc:12613]	0.566277	6.682	65.7405	5.14388e-16	5.23185e-15
ENSG00000180035	ZNF48	zinc finger protein 48 [Source:HGNC Symbol;Acc:13114]	0.944513	4.7535	65.6898	5.27783e-16	5.3644e-15
ENSG00000137216	TMEM63B	transmembrane protein 63B [Source:HGNC Symbol;Acc:17735]	0.978989	4.48742	65.6677	5.33748e-16	5.42131e-15
ENSG00000171033	PKIA	protein kinase (cAMP-dependent, catalytic) inhibitor alpha [Source:HGNC Symbol;Acc:9017]	0.552755	6.78335	65.6596	5.35924e-16	5.43968e-15
ENSG00000123700	KCNJ2	potassium inwardly-rectifying channel, subfamily J, member 2 [Source:HGNC Symbol;Acc:6263]	2.75247	0.498432	65.6247	5.45517e-16	5.53326e-15
ENSG00000117758	STX12	syntaxin 12 [Source:HGNC Symbol;Acc:11430]	0.674881	5.76918	65.6193	5.47007e-16	5.54457e-15
ENSG00000101019	UQCC	ubiquinol-cytochrome c reductase complex chaperone [Source:HGNC Symbol;Acc:15891]	0.57504	6.27673	65.6075	5.5029e-16	5.57404e-15
ENSG00000160305	DIP2A	DIP2 disco-interacting protein 2 homolog A (Drosophila) [Source:HGNC Symbol;Acc:17217]	0.741236	5.27157	65.5893	5.55386e-16	5.62181e-15
ENSG00000167992	VWCE	von Willebrand factor C and EGF domains [Source:HGNC Symbol;Acc:26487]	1.00118	4.41847	65.5692	5.61084e-16	5.67561e-15
ENSG00000183506	PI4KAP2	phosphatidylinositol 4-kinase, catalytic, alpha pseudogene 2 [Source:HGNC Symbol;Acc:33577]	1.41265	3.10251	65.5649	5.62321e-16	5.68424e-15
ENSG00000137941	TTLL7	tubulin tyrosine ligase-like family, member 7 [Source:HGNC Symbol;Acc:26242]	-0.659249	5.99758	65.5614	5.63301e-16	5.69026e-15
ENSG00000171827	ZNF570	zinc finger protein 570 [Source:HGNC Symbol;Acc:26416]	1.22169	3.27913	65.5433	5.68502e-16	5.73888e-15
ENSG00000127564	PKMYT1	protein kinase, membrane associated tyrosine/threonine 1 [Source:HGNC Symbol;Acc:29650]	-1.48175	3.37347	65.5393	5.6968e-16	5.74686e-15
ENSG00000108262	GIT1	G protein-coupled receptor kinase interacting ArfGAP 1 [Source:HGNC Symbol;Acc:4272]	0.819488	5.5326	65.5274	5.73129e-16	5.77749e-15
ENSG00000125945	ZNF436	zinc finger protein 436 [Source:HGNC Symbol;Acc:20814]	0.725849	5.40507	65.5261	5.73496e-16	5.77749e-15
ENSG00000033122	LRRC7	leucine rich repeat containing 7 [Source:HGNC Symbol;Acc:18531]	-1.89917	1.40583	65.4215	6.04749e-16	6.08819e-15
ENSG00000184661	CDCA2	cell division cycle associated 2 [Source:HGNC Symbol;Acc:14623]	-0.670531	6.00007	65.3885	6.1497e-16	6.18688e-15
ENSG00000143153	ATP1B1	ATPase, Na+/K+ transporting, beta 1 polypeptide [Source:HGNC Symbol;Acc:804]	0.512843	8.08334	65.3264	6.34648e-16	6.38052e-15
ENSG00000184545	DUSP8	dual specificity phosphatase 8 [Source:HGNC Symbol;Acc:3074]	3.25643	0.04233	65.3237	6.35526e-16	6.38501e-15
ENSG00000166033	HTRA1	HtrA serine peptidase 1 [Source:HGNC Symbol;Acc:9476]	-1.27998	3.1344	65.3201	6.36688e-16	6.39235e-15
ENSG00000162298	SYVN1	synovial apoptosis inhibitor 1, synoviolin [Source:HGNC Symbol;Acc:20738]	1.11557	4.4133	65.3151	6.38295e-16	6.40414e-15
ENSG00000230906	AC023115.1		-1.74864	2.00304	65.278	6.50432e-16	6.51753e-15
ENSG00000198081	ZFP161	zinc finger protein 161 homolog (mouse) [Source:HGNC Symbol;Acc:12860]	-0.919042	4.52754	65.2779	6.50476e-16	6.51753e-15
ENSG00000167110	GOLGA2	golgin A2 [Source:HGNC Symbol;Acc:4425]	0.766535	5.47366	65.2431	6.62065e-16	6.62916e-15
ENSG00000188215	DCUN1D3	DCN1, defective in cullin neddylation 1, domain containing 3 (S. cerevisiae) [Source:HGNC Symbol;Acc:28734]	1.28094	3.1917	65.2022	6.75953e-16	6.76364e-15
ENSG00000185189	NRBP2	nuclear receptor binding protein 2 [Source:HGNC Symbol;Acc:19339]	-1.32891	3.09658	65.1753	6.85216e-16	6.8517e-15
ENSG00000049449	RCN1	reticulocalbin 1, EF-hand calcium binding domain [Source:HGNC Symbol;Acc:9934]	0.484785	7.98263	65.1538	6.92758e-16	6.92244e-15
ENSG00000123684	LPGAT1	lysophosphatidylglycerol acyltransferase 1 [Source:HGNC Symbol;Acc:28985]	-0.529111	7.62748	65.1077	7.0915e-16	7.08146e-15
ENSG00000174106	LEMD3	LEM domain containing 3 [Source:HGNC Symbol;Acc:28887]	0.653293	5.74233	65.0973	7.12906e-16	7.11417e-15
ENSG00000144674	GOLGA4	golgin A4 [Source:HGNC Symbol;Acc:4427]	0.559606	7.52036	65.0737	7.21473e-16	7.19481e-15
ENSG00000154839	SKA1	spindle and kinetochore associated complex subunit 1 [Source:HGNC Symbol;Acc:28109]	-0.846124	5.1095	65.0569	7.27662e-16	7.25164e-15
ENSG00000108848	LUC7L3	LUC7-like 3 (S. cerevisiae) [Source:HGNC Symbol;Acc:24309]	0.410328	10.1359	65.0284	7.38246e-16	7.35218e-15
ENSG00000140365	COMMD4	COMM domain containing 4 [Source:HGNC Symbol;Acc:26027]	-0.685107	5.87732	65.0224	7.40497e-16	7.36963e-15
ENSG00000118655	DCLRE1B	DNA cross-link repair 1B [Source:HGNC Symbol;Acc:17641]	-0.708934	5.55358	65.0179	7.4221e-16	7.38172e-15
ENSG00000143028	SYPL2	synaptophysin-like 2 [Source:HGNC Symbol;Acc:27638]	2.70666	0.441594	64.9936	7.51433e-16	7.46843e-15
ENSG00000081760	AACS	acetoacetyl-CoA synthetase [Source:HGNC Symbol;Acc:21298]	0.857214	4.62922	64.9691	7.60819e-16	7.55666e-15
ENSG00000110315	RNF141	ring finger protein 141 [Source:HGNC Symbol;Acc:21159]	-0.759906	5.46048	64.9211	7.79579e-16	7.73779e-15
ENSG00000184916	JAG2	jagged 2 [Source:HGNC Symbol;Acc:6189]	2.05666	1.41782	64.7633	8.44563e-16	8.37718e-15
ENSG00000035687	ADSS	adenylosuccinate synthase [Source:HGNC Symbol;Acc:292]	-0.573554	6.84449	64.7356	8.56513e-16	8.49003e-15
ENSG00000143355	LHX9	LIM homeobox 9 [Source:HGNC Symbol;Acc:14222]	-0.657918	6.03056	64.7292	8.59316e-16	8.51212e-15
ENSG00000181016	C7orf53	chromosome 7 open reading frame 53 [Source:HGNC Symbol;Acc:22036]	2.78756	0.612051	64.7183	8.64099e-16	8.55377e-15
ENSG00000182165	TP53TG1	TP53 target 1 (non-protein coding) [Source:HGNC Symbol;Acc:17026]	1.47794	2.93626	64.7129	8.66465e-16	8.57146e-15
ENSG00000136859	ANGPTL2	angiopoietin-like 2 [Source:HGNC Symbol;Acc:490]	0.847464	5.17176	64.6794	8.81315e-16	8.71255e-15
ENSG00000261355	RP11-698N11.4		1.44485	2.44252	64.6531	8.93153e-16	8.82369e-15
ENSG00000162104	ADCY9	adenylate cyclase 9 [Source:HGNC Symbol;Acc:240]	0.917321	4.89907	64.6399	8.99151e-16	8.87701e-15
ENSG00000111676	ATN1	atrophin 1 [Source:HGNC Symbol;Acc:3033]	0.802653	6.53336	64.6366	9.00662e-16	8.88601e-15
ENSG00000137076	TLN1	talin 1 [Source:HGNC Symbol;Acc:11845]	0.621958	7.15629	64.613	9.11534e-16	8.98729e-15
ENSG00000048342	CC2D2A	coiled-coil and C2 domain containing 2A [Source:HGNC Symbol;Acc:29253]	0.717986	5.4482	64.5579	9.3737e-16	9.23587e-15
ENSG00000135046	ANXA1	annexin A1 [Source:HGNC Symbol;Acc:533]	9.69868	-1.10269	64.5564	9.38087e-16	9.23678e-15
ENSG00000168135	KCNJ4	potassium inwardly-rectifying channel, subfamily J, member 4 [Source:HGNC Symbol;Acc:6265]	1.6714	1.87867	64.5363	9.47717e-16	9.32541e-15
ENSG00000130477	UNC13A	unc-13 homolog A (C. elegans) [Source:HGNC Symbol;Acc:23150]	0.661389	6.17618	64.5062	9.62284e-16	9.46246e-15
ENSG00000143570	SLC39A1	solute carrier family 39 (zinc transporter), member 1 [Source:HGNC Symbol;Acc:12876]	0.510602	8.00454	64.4816	9.74359e-16	9.57484e-15
ENSG00000145016	KIAA0226	KIAA0226 [Source:HGNC Symbol;Acc:28991]	0.78914	5.05363	64.4705	9.79873e-16	9.62264e-15
ENSG00000123989	CHPF	chondroitin polymerizing factor [Source:HGNC Symbol;Acc:24291]	1.36657	3.21761	64.4564	9.86928e-16	9.6855e-15
ENSG00000164111	ANXA5	annexin A5 [Source:HGNC Symbol;Acc:543]	-0.568929	6.51577	64.2491	1.09641e-15	1.07528e-14
ENSG00000172890	NADSYN1	NAD synthetase 1 [Source:HGNC Symbol;Acc:29832]	0.819695	4.97186	64.167	1.14307e-15	1.1203e-14
ENSG00000079215	SLC1A3	solute carrier family 1 (glial high affinity glutamate transporter), member 3 [Source:HGNC Symbol;Acc:10941]	1.06547	3.9063	64.0995	1.1829e-15	1.15857e-14
ENSG00000198816	ZNF358	zinc finger protein 358 [Source:HGNC Symbol;Acc:16838]	1.1134	4.44987	64.0836	1.19248e-15	1.16718e-14
ENSG00000112759	SLC29A1	solute carrier family 29 (nucleoside transporters), member 1 [Source:HGNC Symbol;Acc:11003]	-0.739584	5.49006	64.0815	1.19376e-15	1.16766e-14
ENSG00000173546	CSPG4	chondroitin sulfate proteoglycan 4 [Source:HGNC Symbol;Acc:2466]	1.74966	1.59645	64.0711	1.20009e-15	1.17308e-14
ENSG00000132475	H3F3B	H3 histone, family 3B (H3.3B) [Source:HGNC Symbol;Acc:4765]	-0.412779	10.2242	64.0593	1.20728e-15	1.17933e-14
ENSG00000227184	EPPK1	epiplakin 1 [Source:HGNC Symbol;Acc:15577]	6.23659	-1.15183	64.0134	1.23579e-15	1.20638e-14
ENSG00000181704	YIPF6	Yip1 domain family, member 6 [Source:HGNC Symbol;Acc:28304]	0.566746	6.61503	64.0023	1.24272e-15	1.21235e-14
ENSG00000131149	KIAA0182	KIAA0182 [Source:HGNC Symbol;Acc:28979]	-0.496151	7.31718	63.9392	1.28319e-15	1.251e-14
ENSG00000158169	FANCC	Fanconi anemia, complementation group C [Source:HGNC Symbol;Acc:3584]	-0.746781	5.13849	63.9348	1.28605e-15	1.25297e-14
ENSG00000105784	RUNDC3B	RUN domain containing 3B [Source:HGNC Symbol;Acc:30286]	-1.6673	1.8477	63.9081	1.3036e-15	1.26924e-14
ENSG00000183048	SLC25A10	solute carrier family 25 (mitochondrial carrier; dicarboxylate transporter), member 10 [Source:HGNC Symbol;Acc:10980]	-0.741571	6.13252	63.8757	1.32521e-15	1.28943e-14
ENSG00000129933	MAU2	MAU2 chromatid cohesion factor homolog (C. elegans) [Source:HGNC Symbol;Acc:29140]	0.691914	5.89261	63.8415	1.34846e-15	1.31118e-14
ENSG00000111665	CDCA3	cell division cycle associated 3 [Source:HGNC Symbol;Acc:14624]	-1.54078	2.86386	63.8196	1.36347e-15	1.32491e-14
ENSG00000037280	FLT4	fms-related tyrosine kinase 4 [Source:HGNC Symbol;Acc:3767]	-1.58241	2.4841	63.8084	1.3713e-15	1.33164e-14
ENSG00000113161	HMGCR	3-hydroxy-3-methylglutaryl-CoA reductase [Source:HGNC Symbol;Acc:5006]	-0.472096	8.22645	63.7984	1.37826e-15	1.33753e-14
ENSG00000138085	ATRAID	all-trans retinoic acid-induced differentiation factor [Source:HGNC Symbol;Acc:24090]	-0.738131	5.28214	63.7952	1.38048e-15	1.33881e-14
ENSG00000145990	GFOD1	glucose-fructose oxidoreductase domain containing 1 [Source:HGNC Symbol;Acc:21096]	1.05321	3.74179	63.7546	1.40923e-15	1.36579e-14
ENSG00000103194	USP10	ubiquitin specific peptidase 10 [Source:HGNC Symbol;Acc:12608]	0.584007	6.15992	63.6138	1.51367e-15	1.46606e-14
ENSG00000137500	CCDC90B	coiled-coil domain containing 90B [Source:HGNC Symbol;Acc:28108]	0.608821	6.1047	63.5411	1.57053e-15	1.52013e-14
ENSG00000100526	CDKN3	cyclin-dependent kinase inhibitor 3 [Source:HGNC Symbol;Acc:1791]	-1.56276	2.37897	63.5378	1.57322e-15	1.52174e-14
ENSG00000136802	LRRC8A	leucine rich repeat containing 8 family, member A [Source:HGNC Symbol;Acc:19027]	0.754512	5.84263	63.5257	1.58288e-15	1.53008e-14
ENSG00000182459	TEX19	testis expressed 19 [Source:HGNC Symbol;Acc:33802]	-2.03492	1.47224	63.5177	1.58931e-15	1.5353e-14
ENSG00000197858	GPAA1	glycosylphosphatidylinositol anchor attachment protein 1 homolog (yeast) [Source:HGNC Symbol;Acc:4446]	-0.985578	4.55982	63.5141	1.59224e-15	1.53712e-14
ENSG00000110047	EHD1	EH-domain containing 1 [Source:HGNC Symbol;Acc:3242]	0.905804	4.76988	63.3562	1.72511e-15	1.66431e-14
ENSG00000102241	HTATSF1	HIV-1 Tat specific factor 1 [Source:HGNC Symbol;Acc:5276]	-0.477927	7.95485	63.3241	1.7535e-15	1.6906e-14
ENSG00000167004	PDIA3	protein disulfide isomerase family A, member 3 [Source:HGNC Symbol;Acc:4606]	-0.455734	8.64466	63.2756	1.7972e-15	1.7316e-14
ENSG00000122386	ZNF205	zinc finger protein 205 [Source:HGNC Symbol;Acc:12996]	1.31075	3.1978	63.2558	1.81537e-15	1.74797e-14
ENSG00000139636	LMBR1L	limb region 1 homolog (mouse)-like [Source:HGNC Symbol;Acc:18268]	0.917157	4.31141	63.1424	1.92292e-15	1.85032e-14
ENSG00000151414	NEK7	NIMA (never in mitosis gene a)-related kinase 7 [Source:HGNC Symbol;Acc:13386]	-0.590077	7.07074	63.0328	2.03295e-15	1.95494e-14
ENSG00000041515	MYO16	myosin XVI [Source:HGNC Symbol;Acc:29822]	-1.72485	1.65768	62.9448	2.12582e-15	2.04291e-14
ENSG00000106479	ZNF862	zinc finger protein 862 [Source:HGNC Symbol;Acc:34519]	1.76635	1.73701	62.9215	2.15116e-15	2.06592e-14
ENSG00000171055	FEZ2	fasciculation and elongation protein zeta 2 (zygin II) [Source:HGNC Symbol;Acc:3660]	-0.847256	4.76629	62.9191	2.15379e-15	2.06711e-14
ENSG00000159720	ATP6V0D1	ATPase, H+ transporting, lysosomal 38kDa, V0 subunit d1 [Source:HGNC Symbol;Acc:13724]	0.746569	5.29996	62.9027	2.17176e-15	2.083e-14
ENSG00000173261	PLAC8L1	PLAC8-like 1 [Source:HGNC Symbol;Acc:31746]	2.27532	0.745578	62.895	2.18025e-15	2.0898e-14
ENSG00000152240	HAUS1	HAUS augmin-like complex, subunit 1 [Source:HGNC Symbol;Acc:25174]	-0.685069	5.80634	62.8131	2.27279e-15	2.17708e-14
ENSG00000196072	BLOC1S2	biogenesis of lysosomal organelles complex-1, subunit 2 [Source:HGNC Symbol;Acc:20984]	0.609523	6.49584	62.803	2.2845e-15	2.18689e-14
ENSG00000170876	TMEM43	transmembrane protein 43 [Source:HGNC Symbol;Acc:28472]	0.552365	6.42768	62.7744	2.31796e-15	2.21749e-14
ENSG00000254293	CTB-158E9.1		-1.70727	2.29874	62.7438	2.35423e-15	2.25073e-14
ENSG00000140993	TIGD7	tigger transposable element derived 7 [Source:HGNC Symbol;Acc:18331]	0.846692	4.5412	62.7304	2.37032e-15	2.26465e-14
ENSG00000168389	MFSD2A	major facilitator superfamily domain containing 2A [Source:HGNC Symbol;Acc:25897]	0.950652	4.18979	62.7275	2.37373e-15	2.26645e-14
ENSG00000173085	COQ2	coenzyme Q2 homolog, prenyltransferase (yeast) [Source:HGNC Symbol;Acc:25223]	-1.03946	3.8457	62.6991	2.40821e-15	2.29788e-14
ENSG00000181192	DHTKD1	dehydrogenase E1 and transketolase domain containing 1 [Source:HGNC Symbol;Acc:23537]	-0.585202	6.30194	62.6676	2.44713e-15	2.33352e-14
ENSG00000184992	BRI3BP	BRI3 binding protein [Source:HGNC Symbol;Acc:14251]	-0.530133	6.90705	62.6616	2.4545e-15	2.33904e-14
ENSG00000108641	B9D1	B9 protein domain 1 [Source:HGNC Symbol;Acc:24123]	-2.26685	1.37538	62.6422	2.4788e-15	2.36068e-14
ENSG00000178403	NEUROG2	neurogenin 2 [Source:HGNC Symbol;Acc:13805]	-1.34983	2.89117	62.6181	2.50933e-15	2.38821e-14
ENSG00000135111	TBX3	T-box 3 [Source:HGNC Symbol;Acc:11602]	-0.69889	5.41054	62.6086	2.5215e-15	2.39826e-14
ENSG00000182134	TDRKH	tudor and KH domain containing [Source:HGNC Symbol;Acc:11713]	-0.744501	5.43504	62.6001	2.53235e-15	2.40703e-14
ENSG00000131236	CAP1	CAP, adenylate cyclase-associated protein 1 (yeast) [Source:HGNC Symbol;Acc:20040]	0.464928	7.74352	62.5965	2.53708e-15	2.40962e-14
ENSG00000146143	PRIM2	primase, DNA, polypeptide 2 (58kDa) [Source:HGNC Symbol;Acc:9370]	-0.770991	5.34174	62.5955	2.53832e-15	2.40962e-14
ENSG00000250366	LINC00617	long intergenic non-protein coding RNA 617 [Source:HGNC Symbol;Acc:44088]	-1.09346	3.57936	62.4857	2.68383e-15	2.54611e-14
ENSG00000119203	CPSF3	cleavage and polyadenylation specific factor 3, 73kDa [Source:HGNC Symbol;Acc:2326]	-0.571746	6.63779	62.4729	2.7013e-15	2.56105e-14
ENSG00000170448	NFXL1	nuclear transcription factor, X-box binding-like 1 [Source:HGNC Symbol;Acc:18726]	0.684456	5.63284	62.3961	2.80875e-15	2.66122e-14
ENSG00000128564	VGF	VGF nerve growth factor inducible [Source:HGNC Symbol;Acc:12684]	2.85661	1.36274	62.3634	2.85586e-15	2.70412e-14
ENSG00000139645	ANKRD52	ankyrin repeat domain 52 [Source:HGNC Symbol;Acc:26614]	0.661838	6.48242	62.3536	2.86999e-15	2.71577e-14
ENSG00000042445	RETSAT	retinol saturase (all-trans-retinol 13,14-reductase) [Source:HGNC Symbol;Acc:25991]	0.821225	4.76348	62.3363	2.8954e-15	2.73806e-14
ENSG00000011243	AKAP8L	A kinase (PRKA) anchor protein 8-like [Source:HGNC Symbol;Acc:29857]	0.811934	5.67976	62.3263	2.9101e-15	2.75021e-14
ENSG00000166619	BLCAP	bladder cancer associated protein [Source:HGNC Symbol;Acc:1055]	0.55744	6.54461	62.3228	2.91529e-15	2.75335e-14
ENSG00000108021	FAM208B	family with sequence similarity 208, member B [Source:HGNC Symbol;Acc:23484]	0.456134	8.39884	62.2827	2.97534e-15	2.80827e-14
ENSG00000163947	ARHGEF3	Rho guanine nucleotide exchange factor (GEF) 3 [Source:HGNC Symbol;Acc:683]	1.0272	3.79932	62.2675	2.99827e-15	2.82812e-14
ENSG00000111348	ARHGDIB	Rho GDP dissociation inhibitor (GDI) beta [Source:HGNC Symbol;Acc:679]	1.5013	2.37256	62.2525	3.02122e-15	2.84794e-14
ENSG00000167770	OTUB1	OTU domain, ubiquitin aldehyde binding 1 [Source:HGNC Symbol;Acc:23077]	0.669049	6.01141	62.2425	3.03668e-15	2.8607e-14
ENSG00000061273	HDAC7	histone deacetylase 7 [Source:HGNC Symbol;Acc:14067]	0.923492	5.29955	62.2217	3.06889e-15	2.88921e-14
ENSG00000117385	LEPRE1	leucine proline-enriched proteoglycan (leprecan) 1 [Source:HGNC Symbol;Acc:19316]	0.876945	4.92021	62.181	3.13293e-15	2.94762e-14
ENSG00000136108	CKAP2	cytoskeleton associated protein 2 [Source:HGNC Symbol;Acc:1990]	-0.495023	7.98835	62.1732	3.14541e-15	2.95748e-14
ENSG00000131238	PPT1	palmitoyl-protein thioesterase 1 [Source:HGNC Symbol;Acc:9325]	0.496288	7.82984	62.1161	3.23801e-15	3.04262e-14
ENSG00000106003	LFNG	LFNG O-fucosylpeptide 3-beta-N-acetylglucosaminyltransferase [Source:HGNC Symbol;Acc:6560]	-1.32145	2.75191	62.1011	3.2627e-15	3.06388e-14
ENSG00000100075	SLC25A1	solute carrier family 25 (mitochondrial carrier; citrate transporter), member 1 [Source:HGNC Symbol;Acc:10979]	-0.98706	4.61435	62.0707	3.3135e-15	3.10961e-14
ENSG00000135968	GCC2	GRIP and coiled-coil domain containing 2 [Source:HGNC Symbol;Acc:23218]	0.539738	6.64388	62.0324	3.37846e-15	3.16857e-14
ENSG00000122547	EEPD1	endonuclease/exonuclease/phosphatase family domain containing 1 [Source:HGNC Symbol;Acc:22223]	0.974067	4.3041	61.9951	3.44308e-15	3.22712e-14
ENSG00000261668	RP11-50D9.3		2.15352	0.991284	61.9396	3.54153e-15	3.3173e-14
ENSG00000151689	INPP1	inositol polyphosphate-1-phosphatase [Source:HGNC Symbol;Acc:6071]	1.68856	1.74181	61.9273	3.56378e-15	3.33603e-14
ENSG00000183508	FAM46C	family with sequence similarity 46, member C [Source:HGNC Symbol;Acc:24712]	2.9688	-0.0817204	61.9232	3.57112e-15	3.3408e-14
ENSG00000112218	GPR63	G protein-coupled receptor 63 [Source:HGNC Symbol;Acc:13302]	1.05636	3.7562	61.9067	3.60116e-15	3.36677e-14
ENSG00000160216	AGPAT3	1-acylglycerol-3-phosphate O-acyltransferase 3 [Source:HGNC Symbol;Acc:326]	1.22062	3.24087	61.8608	3.68607e-15	3.44398e-14
ENSG00000179914	ITLN1	intelectin 1 (galactofuranose binding) [Source:HGNC Symbol;Acc:18259]	0.602977	6.02094	61.855	3.69705e-15	3.45206e-14
ENSG00000132024	CC2D1A	coiled-coil and C2 domain containing 1A [Source:HGNC Symbol;Acc:30237]	1.22395	3.63525	61.8535	3.69981e-15	3.45246e-14
ENSG00000141441	FAM59A	family with sequence similarity 59, member A [Source:HGNC Symbol;Acc:26136]	-0.722298	5.39326	61.85	3.70636e-15	3.45639e-14
ENSG00000139625	MAP3K12	mitogen-activated protein kinase kinase kinase 12 [Source:HGNC Symbol;Acc:6851]	0.929152	4.20179	61.8273	3.74932e-15	3.49426e-14
ENSG00000029534	ANK1	ankyrin 1, erythrocytic [Source:HGNC Symbol;Acc:492]	1.47202	1.98429	61.8065	3.7893e-15	3.52929e-14
ENSG00000183579	ZNRF3	zinc and ring finger 3 [Source:HGNC Symbol;Acc:18126]	-0.549402	6.68463	61.7825	3.83566e-15	3.57022e-14
ENSG00000168264	IRF2BP2	interferon regulatory factor 2 binding protein 2 [Source:HGNC Symbol;Acc:21729]	0.523381	6.64295	61.7675	3.86507e-15	3.59534e-14
ENSG00000119682	KIAA0317	KIAA0317 [Source:HGNC Symbol;Acc:20363]	0.527442	6.68659	61.6788	4.04315e-15	3.75863e-14
ENSG00000162804	SNED1	sushi, nidogen and EGF-like domains 1 [Source:HGNC Symbol;Acc:24696]	1.7052	1.79464	61.6713	4.05863e-15	3.77066e-14
ENSG00000225101	OR52K3P	olfactory receptor, family 52, subfamily K, member 3 pseudogene [Source:HGNC Symbol;Acc:15224]	9.21554	-1.77065	61.6358	4.13238e-15	3.83676e-14
ENSG00000076944	STXBP2	syntaxin binding protein 2 [Source:HGNC Symbol;Acc:11445]	5.76051	-0.615037	61.4588	4.5211e-15	4.19505e-14
ENSG00000117318	ID3	inhibitor of DNA binding 3, dominant negative helix-loop-helix protein [Source:HGNC Symbol;Acc:5362]	1.10748	4.38302	61.42	4.61096e-15	4.27575e-14
ENSG00000186638	KIF24	kinesin family member 24 [Source:HGNC Symbol;Acc:19916]	-0.976358	4.00281	61.4154	4.6217e-15	4.28303e-14
ENSG00000101464	PIGU	phosphatidylinositol glycan anchor biosynthesis, class U [Source:HGNC Symbol;Acc:15791]	-0.875235	4.48355	61.3913	4.67882e-15	4.33325e-14
ENSG00000154222	CC2D1B	coiled-coil and C2 domain containing 1B [Source:HGNC Symbol;Acc:29386]	0.759303	5.48242	61.3691	4.73174e-15	4.37952e-14
ENSG00000117408	IPO13	importin 13 [Source:HGNC Symbol;Acc:16853]	0.833479	5.49195	61.3092	4.87789e-15	4.51197e-14
ENSG00000068120	COASY	CoA synthase [Source:HGNC Symbol;Acc:29932]	0.783528	6.19373	61.2647	4.98944e-15	4.61227e-14
ENSG00000163931	TKT	transketolase [Source:HGNC Symbol;Acc:11834]	0.619997	7.41985	61.1721	5.22975e-15	4.83141e-14
ENSG00000139514	SLC7A1	solute carrier family 7 (cationic amino acid transporter, y+ system), member 1 [Source:HGNC Symbol;Acc:11057]	0.54524	7.10103	61.1706	5.23366e-15	4.832e-14
ENSG00000066422	ZBTB11	zinc finger and BTB domain containing 11 [Source:HGNC Symbol;Acc:16740]	0.683357	6.18662	61.1256	5.35467e-15	4.93804e-14
ENSG00000111237	VPS29	vacuolar protein sorting 29 homolog (S. cerevisiae) [Source:HGNC Symbol;Acc:14340]	-0.643873	6.04266	61.1254	5.35519e-15	4.93804e-14
ENSG00000119865	CNRIP1	cannabinoid receptor interacting protein 1 [Source:HGNC Symbol;Acc:24546]	-0.632355	5.87138	60.982	5.75984e-15	5.30787e-14
ENSG00000132424	PNISR	PNN-interacting serine/arginine-rich protein [Source:HGNC Symbol;Acc:21222]	0.475691	8.67156	60.9723	5.78838e-15	5.33085e-14
ENSG00000170142	UBE2E1	ubiquitin-conjugating enzyme E2E 1 [Source:HGNC Symbol;Acc:12477]	0.523391	7.08898	60.9646	5.81107e-15	5.34842e-14
ENSG00000139629	GALNT6	UDP-N-acetyl-alpha-D-galactosamine:polypeptide N-acetylgalactosaminyltransferase 6 (GalNAc-T6) [Source:HGNC Symbol;Acc:4128]	-0.997963	3.61799	60.9054	5.98841e-15	5.50822e-14
ENSG00000102858	MGRN1	mahogunin ring finger 1, E3 ubiquitin protein ligase [Source:HGNC Symbol;Acc:20254]	0.985902	5.28565	60.9015	6.00043e-15	5.51585e-14
ENSG00000126216	TUBGCP3	tubulin, gamma complex associated protein 3 [Source:HGNC Symbol;Acc:18598]	-0.643034	5.80054	60.9	6.00483e-15	5.51647e-14
ENSG00000155368	DBI	diazepam binding inhibitor (GABA receptor modulator, acyl-CoA binding protein) [Source:HGNC Symbol;Acc:2690]	-0.56171	6.46749	60.8816	6.06113e-15	5.56474e-14
ENSG00000139990	DCAF5	DDB1 and CUL4 associated factor 5 [Source:HGNC Symbol;Acc:20224]	0.574463	6.17207	60.8377	6.19791e-15	5.6868e-14
ENSG00000088992	TESC	tescalcin [Source:HGNC Symbol;Acc:26065]	-1.28375	2.9652	60.774	6.40179e-15	5.87022e-14
ENSG00000152455	SUV39H2	suppressor of variegation 3-9 homolog 2 (Drosophila) [Source:HGNC Symbol;Acc:17287]	-0.578992	6.29348	60.7605	6.44597e-15	5.90707e-14
ENSG00000254996	ANKHD1-EIF4EBP3	ANKHD1-EIF4EBP3 readthrough [Source:HGNC Symbol;Acc:33530]	1.90568	1.54377	60.7319	6.5401e-15	5.98622e-14
ENSG00000198589	LRBA	LPS-responsive vesicle trafficking, beach and anchor containing [Source:HGNC Symbol;Acc:1742]	-0.522864	6.84	60.7318	6.54042e-15	5.98622e-14
ENSG00000133302	ANKRD32	ankyrin repeat domain 32 [Source:HGNC Symbol;Acc:25408]	-0.759339	5.21217	60.6893	6.68321e-15	6.11314e-14
ENSG00000196588	MKL1	megakaryoblastic leukemia (translocation) 1 [Source:HGNC Symbol;Acc:14334]	0.940425	4.5418	60.684	6.70118e-15	6.12579e-14
ENSG00000164118	CEP44	centrosomal protein 44kDa [Source:HGNC Symbol;Acc:29356]	-0.480502	8.18935	60.6434	6.84102e-15	6.24976e-14
ENSG00000139618	BRCA2	breast cancer 2, early onset [Source:HGNC Symbol;Acc:1101]	-0.647291	5.86601	60.5946	7.01248e-15	6.40245e-14
ENSG00000062194	GPBP1	GC-rich promoter binding protein 1 [Source:HGNC Symbol;Acc:29520]	0.502985	7.68939	60.5905	7.0273e-15	6.41203e-14
ENSG00000178075	GRAMD1C	GRAM domain containing 1C [Source:HGNC Symbol;Acc:25252]	-2.25277	1.26334	60.5841	7.05007e-15	6.42885e-14
ENSG00000175175	PPM1E	protein phosphatase, Mg2+/Mn2+ dependent, 1E [Source:HGNC Symbol;Acc:19322]	0.492797	7.24568	60.5828	7.05461e-15	6.42903e-14
ENSG00000140263	SORD	sorbitol dehydrogenase [Source:HGNC Symbol;Acc:11184]	-0.492718	7.12318	60.5538	7.15944e-15	6.52055e-14
ENSG00000068745	IP6K2	inositol hexakisphosphate kinase 2 [Source:HGNC Symbol;Acc:17313]	0.523914	6.83999	60.4499	7.54768e-15	6.86992e-14
ENSG00000173674	EIF1AX	eukaryotic translation initiation factor 1A, X-linked [Source:HGNC Symbol;Acc:3250]	-0.500867	8.14965	60.3418	7.9738e-15	7.25332e-14
ENSG00000158445	KCNB1	potassium voltage-gated channel, Shab-related subfamily, member 1 [Source:HGNC Symbol;Acc:6231]	1.23412	2.71217	60.3368	7.99378e-15	7.26703e-14
ENSG00000177125	ZBTB34	zinc finger and BTB domain containing 34 [Source:HGNC Symbol;Acc:31446]	0.718525	5.44782	60.314	8.08687e-15	7.34448e-14
ENSG00000096093	EFHC1	EF-hand domain (C-terminal) containing 1 [Source:HGNC Symbol;Acc:16406]	-0.940169	4.45866	60.3135	8.08889e-15	7.34448e-14
ENSG00000029364	SLC39A9	solute carrier family 39 (zinc transporter), member 9 [Source:HGNC Symbol;Acc:20182]	0.506674	6.80971	60.2585	8.31822e-15	7.54807e-14
ENSG00000134255	CEPT1	choline/ethanolamine phosphotransferase 1 [Source:HGNC Symbol;Acc:24289]	0.62681	6.02081	60.2288	8.44485e-15	7.65829e-14
ENSG00000140931	CMTM3	CKLF-like MARVEL transmembrane domain containing 3 [Source:HGNC Symbol;Acc:19174]	0.8422	4.52651	60.1091	8.9742e-15	8.13335e-14
ENSG00000106080	FKBP14	FK506 binding protein 14, 22 kDa [Source:HGNC Symbol;Acc:18625]	0.686458	5.61604	60.0983	9.02341e-15	8.17294e-14
ENSG00000180448	HMHA1	histocompatibility (minor) HA-1 [Source:HGNC Symbol;Acc:17102]	1.49488	2.55794	60.0909	9.05746e-15	8.19878e-14
ENSG00000121966	CXCR4	chemokine (C-X-C motif) receptor 4 [Source:HGNC Symbol;Acc:2561]	-0.957589	4.21541	60.0392	9.29888e-15	8.41217e-14
ENSG00000125871	C20orf72	chromosome 20 open reading frame 72 [Source:HGNC Symbol;Acc:16205]	-0.598292	6.02597	59.9922	9.52356e-15	8.61015e-14
ENSG00000111696	NT5DC3	5'-nucleotidase domain containing 3 [Source:HGNC Symbol;Acc:30826]	-0.820303	5.05283	59.9813	9.57639e-15	8.65264e-14
ENSG00000261770	CTC-459F4.1		1.52803	2.07653	59.8858	1.00522e-14	9.07701e-14
ENSG00000117600	RP4-788L13.1	Lipid phosphate phosphatase-related protein type 4 [Source:UniProtKB/Swiss-Prot;Acc:Q7Z2D5]	0.580927	6.65585	59.8087	1.04539e-14	9.43399e-14
ENSG00000088986	DYNLL1	dynein, light chain, LC8-type 1 [Source:HGNC Symbol;Acc:15476]	-0.490161	7.82528	59.8022	1.04883e-14	9.45931e-14
ENSG00000261342	AC006538.1		2.44039	0.785802	59.7991	1.0505e-14	9.46857e-14
ENSG00000129128	SPCS3	signal peptidase complex subunit 3 homolog (S. cerevisiae) [Source:HGNC Symbol;Acc:26212]	-0.519621	7.22752	59.7682	1.06714e-14	9.61273e-14
ENSG00000143614	GATAD2B	GATA zinc finger domain containing 2B [Source:HGNC Symbol;Acc:30778]	0.469803	7.82252	59.7639	1.06947e-14	9.62786e-14
ENSG00000178852	EFCAB13	EF-hand calcium binding domain 13 [Source:HGNC Symbol;Acc:26864]	1.29792	3.0625	59.7108	1.09873e-14	9.88523e-14
ENSG00000186501	TMEM222	transmembrane protein 222 [Source:HGNC Symbol;Acc:25363]	0.916751	4.39447	59.6669	1.12352e-14	1.01021e-13
ENSG00000144681	STAC	SH3 and cysteine rich domain [Source:HGNC Symbol;Acc:11353]	-0.629377	5.70138	59.6574	1.12896e-14	1.01415e-13
ENSG00000072364	AFF4	AF4/FMR2 family, member 4 [Source:HGNC Symbol;Acc:17869]	0.467708	7.98934	59.6568	1.12927e-14	1.01415e-13
ENSG00000198673	FAM19A2	family with sequence similarity 19 (chemokine (C-C motif)-like), member A2 [Source:HGNC Symbol;Acc:21589]	1.88477	1.52163	59.6493	1.1336e-14	1.01742e-13
ENSG00000163879	DNALI1	dynein, axonemal, light intermediate chain 1 [Source:HGNC Symbol;Acc:14353]	3.00207	0.0464333	59.6481	1.13429e-14	1.01743e-13
ENSG00000198785	GRIN3A	glutamate receptor, ionotropic, N-methyl-D-aspartate 3A [Source:HGNC Symbol;Acc:16767]	-0.932382	4.35954	59.5897	1.16848e-14	1.04746e-13
ENSG00000148730	EIF4EBP2	eukaryotic translation initiation factor 4E binding protein 2 [Source:HGNC Symbol;Acc:3289]	-0.419653	8.6129	59.5809	1.17371e-14	1.05151e-13
ENSG00000166595	FAM96B	family with sequence similarity 96, member B [Source:HGNC Symbol;Acc:24261]	0.730977	5.53834	59.5773	1.17586e-14	1.0528e-13
ENSG00000140044	JDP2	Jun dimerization protein 2 [Source:HGNC Symbol;Acc:17546]	1.37858	3.00951	59.5241	1.20803e-14	1.08095e-13
ENSG00000186376	ZNF75D	zinc finger protein 75D [Source:HGNC Symbol;Acc:13145]	0.74076	4.90074	59.4996	1.22316e-14	1.09383e-13
ENSG00000112200	ZNF451	zinc finger protein 451 [Source:HGNC Symbol;Acc:21091]	0.518188	6.74808	59.4972	1.22471e-14	1.09455e-13
ENSG00000100162	CENPM	centromere protein M [Source:HGNC Symbol;Acc:18352]	-1.30297	3.08975	59.4949	1.2261e-14	1.09513e-13
ENSG00000162073	PAQR4	progestin and adipoQ receptor family member IV [Source:HGNC Symbol;Acc:26386]	-1.19511	3.66821	59.49	1.22918e-14	1.09723e-13
ENSG00000121104	FAM117A	family with sequence similarity 117, member A [Source:HGNC Symbol;Acc:24179]	0.840049	4.88247	59.4653	1.24472e-14	1.11043e-13
ENSG00000162613	FUBP1	far upstream element (FUSE) binding protein 1 [Source:HGNC Symbol;Acc:4004]	-0.417859	9.08946	59.4311	1.26652e-14	1.1292e-13
ENSG00000101447	FAM83D	family with sequence similarity 83, member D [Source:HGNC Symbol;Acc:16122]	-0.636913	5.97902	59.3937	1.29084e-14	1.15018e-13
ENSG00000257743	RP11-1220K2.2	Putative maltase-glucoamylase-like protein FLJ16351 [Source:UniProtKB/Swiss-Prot;Acc:Q6ZN80]	4.47805	-0.769599	59.3669	1.30853e-14	1.16524e-13
ENSG00000130382	MLLT1	myeloid/lymphoid or mixed-lineage leukemia (trithorax homolog, Drosophila); translocated to, 1 [Source:HGNC Symbol;Acc:7134]	0.730384	6.01928	59.3178	1.34157e-14	1.19395e-13
ENSG00000160360	GPSM1	G-protein signaling modulator 1 [Source:HGNC Symbol;Acc:17858]	0.932233	5.04058	59.2756	1.37067e-14	1.21912e-13
ENSG00000123213	NLN	neurolysin (metallopeptidase M3 family) [Source:HGNC Symbol;Acc:16058]	-0.554334	6.79594	59.27	1.37454e-14	1.22183e-13
ENSG00000139354	GAS2L3	growth arrest-specific 2 like 3 [Source:HGNC Symbol;Acc:27475]	-0.999724	4.29567	59.263	1.37947e-14	1.22547e-13
ENSG00000131023	LATS1	LATS, large tumor suppressor, homolog 1 (Drosophila) [Source:HGNC Symbol;Acc:6514]	0.507847	6.92808	59.2608	1.38101e-14	1.2261e-13
ENSG00000099942	CRKL	v-crk sarcoma virus CT10 oncogene homolog (avian)-like [Source:HGNC Symbol;Acc:2363]	0.437581	8.09657	59.2342	1.39981e-14	1.24205e-13
ENSG00000134363	FST	follistatin [Source:HGNC Symbol;Acc:3971]	1.86862	1.37139	59.1857	1.43476e-14	1.2723e-13
ENSG00000147536	GINS4	GINS complex subunit 4 (Sld5 homolog) [Source:HGNC Symbol;Acc:28226]	-0.881985	4.84231	59.1823	1.4372e-14	1.2737e-13
ENSG00000130734	ATG4D	autophagy related 4D, cysteine peptidase [Source:HGNC Symbol;Acc:20789]	1.11362	4.03641	59.175	1.44252e-14	1.27764e-13
ENSG00000103966	EHD4	EH-domain containing 4 [Source:HGNC Symbol;Acc:3245]	-1.06443	3.46932	59.1298	1.47605e-14	1.30656e-13
ENSG00000163531	NFASC	neurofascin [Source:HGNC Symbol;Acc:29866]	0.719447	5.0723	58.9956	1.58027e-14	1.39752e-13
ENSG00000128512	DOCK4	dedicator of cytokinesis 4 [Source:HGNC Symbol;Acc:19192]	0.745788	5.15402	58.995	1.58069e-14	1.39752e-13
ENSG00000205664	RP11-706O15.1	HCG1981372, isoform CRA_c; Novel protein; Uncharacterized protein [Source:UniProtKB/TrEMBL;Acc:B1B108]	0.78717	4.87474	58.9784	1.59414e-14	1.40857e-13
ENSG00000159322	ADPGK	ADP-dependent glucokinase [Source:HGNC Symbol;Acc:25250]	0.465315	7.33351	58.9564	1.61208e-14	1.42357e-13
ENSG00000196531	NACA	nascent polypeptide-associated complex alpha subunit [Source:HGNC Symbol;Acc:7629]	0.39791	9.64307	58.9155	1.64592e-14	1.45259e-13
ENSG00000108825	AARSD1	alanyl-tRNA synthetase domain containing 1 [Source:HGNC Symbol;Acc:28417]	0.522951	6.56535	58.8548	1.6975e-14	1.49722e-13
ENSG00000108107	RPL28	ribosomal protein L28 [Source:HGNC Symbol;Acc:10330]	0.659185	7.68735	58.8446	1.70626e-14	1.50405e-13
ENSG00000183662	FAM19A1	family with sequence similarity 19 (chemokine (C-C motif)-like), member A1 [Source:HGNC Symbol;Acc:21587]	-2.29533	0.905881	58.8233	1.72489e-14	1.51956e-13
ENSG00000132639	SNAP25	synaptosomal-associated protein, 25kDa [Source:HGNC Symbol;Acc:11132]	0.696187	5.38895	58.788	1.75605e-14	1.5461e-13
ENSG00000133624	ZNF767	zinc finger family member 767 [Source:HGNC Symbol;Acc:21884]	0.840034	4.46677	58.7241	1.81407e-14	1.59623e-13
ENSG00000132740	IGHMBP2	immunoglobulin mu binding protein 2 [Source:HGNC Symbol;Acc:5542]	0.962662	4.56895	58.7045	1.83224e-14	1.61126e-13
ENSG00000135953	MFSD9	major facilitator superfamily domain containing 9 [Source:HGNC Symbol;Acc:28158]	0.864962	4.29569	58.6967	1.8395e-14	1.61668e-13
ENSG00000051341	POLQ	polymerase (DNA directed), theta [Source:HGNC Symbol;Acc:9186]	-0.588514	6.03766	58.6803	1.85488e-14	1.62924e-13
ENSG00000174574	AKIRIN1	akirin 1 [Source:HGNC Symbol;Acc:25744]	0.464006	7.86856	58.6746	1.86031e-14	1.63303e-13
ENSG00000187676	B3GALTL	beta 1,3-galactosyltransferase-like [Source:HGNC Symbol;Acc:20207]	-0.861395	4.59587	58.6361	1.89702e-14	1.66427e-13
ENSG00000142864	SERBP1	SERPINE1 mRNA binding protein 1 [Source:HGNC Symbol;Acc:17860]	-0.401788	10.1917	58.5823	1.94961e-14	1.7094e-13
ENSG00000175216	CKAP5	cytoskeleton associated protein 5 [Source:HGNC Symbol;Acc:28959]	-0.405408	9.29148	58.5504	1.98145e-14	1.73629e-13
ENSG00000171766	GATM	glycine amidinotransferase (L-arginine:glycine amidinotransferase) [Source:HGNC Symbol;Acc:4175]	-1.0993	3.60399	58.5352	1.99689e-14	1.74879e-13
ENSG00000167716	WDR81	WD repeat domain 81 [Source:HGNC Symbol;Acc:26600]	0.928922	4.83716	58.4918	2.04136e-14	1.78667e-13
ENSG00000167815	PRDX2	peroxiredoxin 2 [Source:HGNC Symbol;Acc:9353]	-0.577495	7.33897	58.4597	2.07497e-14	1.81502e-13
ENSG00000137124	ALDH1B1	aldehyde dehydrogenase 1 family, member B1 [Source:HGNC Symbol;Acc:407]	-0.597834	5.98589	58.4364	2.0997e-14	1.83556e-13
ENSG00000174233	ADCY6	adenylate cyclase 6 [Source:HGNC Symbol;Acc:237]	0.777629	5.31381	58.3717	2.16992e-14	1.89505e-13
ENSG00000159164	SV2A	synaptic vesicle glycoprotein 2A [Source:HGNC Symbol;Acc:20566]	0.484615	7.80738	58.3708	2.17093e-14	1.89505e-13
ENSG00000055118	KCNH2	potassium voltage-gated channel, subfamily H (eag-related), member 2 [Source:HGNC Symbol;Acc:6251]	0.850382	5.4199	58.3702	2.17159e-14	1.89505e-13
ENSG00000182768	NGRN	neugrin, neurite outgrowth associated [Source:HGNC Symbol;Acc:18077]	0.648367	5.98704	58.3687	2.17321e-14	1.89536e-13
ENSG00000108599	AKAP10	A kinase (PRKA) anchor protein 10 [Source:HGNC Symbol;Acc:368]	0.703967	5.25472	58.3655	2.17671e-14	1.89729e-13
ENSG00000159905	ZNF221	zinc finger protein 221 [Source:HGNC Symbol;Acc:13014]	1.3639	2.4491	58.356	2.1873e-14	1.9054e-13
ENSG00000138641	HERC3	HECT and RLD domain containing E3 ubiquitin protein ligase 3 [Source:HGNC Symbol;Acc:4876]	-1.16123	3.04232	58.3176	2.23037e-14	1.94177e-13
ENSG00000166847	DCTN5	dynactin 5 (p25) [Source:HGNC Symbol;Acc:24594]	0.459339	7.36893	58.2808	2.27254e-14	1.97732e-13
ENSG00000259715	CTD-3110H11.1		1.36452	2.88461	58.2791	2.27449e-14	1.97786e-13
ENSG00000166272	WBP1L	WW domain binding protein 1-like [Source:HGNC Symbol;Acc:23510]	0.905801	4.42648	58.2633	2.29282e-14	1.99263e-13
ENSG00000103202	NME4	NME/NM23 nucleoside diphosphate kinase 4 [Source:HGNC Symbol;Acc:7852]	-0.61393	6.74523	58.2116	2.35391e-14	2.04452e-13
ENSG00000179627	ZBTB42	zinc finger and BTB domain containing 42 [Source:HGNC Symbol;Acc:32550]	-1.89178	1.42428	58.2028	2.36443e-14	2.05246e-13
ENSG00000166860	ZBTB39	zinc finger and BTB domain containing 39 [Source:HGNC Symbol;Acc:29014]	0.515561	6.61997	58.2014	2.36611e-14	2.05271e-13
ENSG00000215458	AP001053.11		3.53064	-0.299459	58.1276	2.45653e-14	2.1299e-13
ENSG00000102024	PLS3	plastin 3 [Source:HGNC Symbol;Acc:9091]	0.497409	7.13133	58.1106	2.47791e-14	2.14719e-13
ENSG00000134285	FKBP11	FK506 binding protein 11, 19 kDa [Source:HGNC Symbol;Acc:18624]	1.03015	3.93439	58.0786	2.51848e-14	2.18106e-13
ENSG00000143110	C1orf162	chromosome 1 open reading frame 162 [Source:HGNC Symbol;Acc:28344]	2.67009	0.306195	58.0562	2.54741e-14	2.20482e-13
ENSG00000164305	CASP3	caspase 3, apoptosis-related cysteine peptidase [Source:HGNC Symbol;Acc:1504]	-0.654919	5.85039	58.0214	2.5928e-14	2.24281e-13
ENSG00000257335	MGAM	maltase-glucoamylase (alpha-glucosidase) [Source:HGNC Symbol;Acc:7043]	2.60856	0.356206	58.0154	2.60068e-14	2.24831e-13
ENSG00000103647	CORO2B	coronin, actin binding protein, 2B [Source:HGNC Symbol;Acc:2256]	-1.42469	2.21085	58.0134	2.60339e-14	2.24934e-13
ENSG00000079691	LRRC16A	leucine rich repeat containing 16A [Source:HGNC Symbol;Acc:21581]	1.10066	3.19367	57.9952	2.62755e-14	2.26889e-13
ENSG00000183648	NDUFB1	NADH dehydrogenase (ubiquinone) 1 beta subcomplex, 1, 7kDa [Source:HGNC Symbol;Acc:7695]	-0.718752	5.32603	57.987	2.6385e-14	2.27701e-13
ENSG00000111846	GCNT2	glucosaminyl (N-acetyl) transferase 2, I-branching enzyme (I blood group) [Source:HGNC Symbol;Acc:4204]	0.952256	4.16365	57.9597	2.6754e-14	2.30752e-13
ENSG00000106086	PLEKHA8	pleckstrin homology domain containing, family A (phosphoinositide binding specific) member 8 [Source:HGNC Symbol;Acc:30037]	0.691662	5.40296	57.9319	2.71357e-14	2.33907e-13
ENSG00000185818	NAT8L	N-acetyltransferase 8-like (GCN5-related, putative) [Source:HGNC Symbol;Acc:26742]	1.05785	3.94851	57.9269	2.72045e-14	2.34364e-13
ENSG00000260482	CTD-2196E14.9		0.915508	4.17905	57.8777	2.78931e-14	2.40156e-13
ENSG00000166562	SEC11C	SEC11 homolog C (S. cerevisiae) [Source:HGNC Symbol;Acc:23400]	0.65782	5.69016	57.827	2.86211e-14	2.46281e-13
ENSG00000257898	RP11-496I2.3		1.08433	3.21927	57.8121	2.88394e-14	2.48015e-13
ENSG00000124789	NUP153	nucleoporin 153kDa [Source:HGNC Symbol;Acc:8062]	-0.472155	7.88553	57.7988	2.9035e-14	2.49553e-13
ENSG00000198265	HELZ	helicase with zinc finger [Source:HGNC Symbol;Acc:16878]	0.457204	7.79399	57.7758	2.93755e-14	2.52333e-13
ENSG00000001631	KRIT1	KRIT1, ankyrin repeat containing [Source:HGNC Symbol;Acc:1573]	-0.583168	6.11728	57.7557	2.96773e-14	2.54777e-13
ENSG00000260852	FBXL19-AS1	FBXL19 antisense RNA 1 (head to head) [Source:HGNC Symbol;Acc:27557]	1.0104	3.66507	57.736	2.99765e-14	2.57197e-13
ENSG00000171295	ZNF440	zinc finger protein 440 [Source:HGNC Symbol;Acc:20874]	0.798924	4.7135	57.7336	3.00129e-14	2.5736e-13
ENSG00000174405	LIG4	ligase IV, DNA, ATP-dependent [Source:HGNC Symbol;Acc:6601]	0.6467	5.7889	57.6948	3.06115e-14	2.62341e-13
ENSG00000087077	TRIP6	thyroid hormone receptor interactor 6 [Source:HGNC Symbol;Acc:12311]	0.993735	4.19302	57.6486	3.13386e-14	2.68417e-13
ENSG00000133878	DUSP26	dual specificity phosphatase 26 (putative) [Source:HGNC Symbol;Acc:28161]	1.07697	4.2554	57.6069	3.20099e-14	2.74008e-13
ENSG00000164823	OSGIN2	oxidative stress induced growth inhibitor family member 2 [Source:HGNC Symbol;Acc:1355]	-0.707625	5.27984	57.6025	3.20819e-14	2.74402e-13
ENSG00000054965	FAM168A	family with sequence similarity 168, member A [Source:HGNC Symbol;Acc:28999]	0.514117	6.64005	57.6018	3.20929e-14	2.74402e-13
ENSG00000141579	ZNF750	zinc finger protein 750 [Source:HGNC Symbol;Acc:25843]	2.56944	0.39402	57.5912	3.22672e-14	2.75733e-13
ENSG00000165072	MAMDC2	MAM domain containing 2 [Source:HGNC Symbol;Acc:23673]	-1.02533	3.50762	57.5814	3.24278e-14	2.76945e-13
ENSG00000121577	POPDC2	popeye domain containing 2 [Source:HGNC Symbol;Acc:17648]	1.78366	1.25745	57.5675	3.26569e-14	2.78741e-13
ENSG00000182601	HS3ST4	heparan sulfate (glucosamine) 3-O-sulfotransferase 4 [Source:HGNC Symbol;Acc:5200]	1.04564	3.44608	57.5102	3.36224e-14	2.86817e-13
ENSG00000118407	FILIP1	filamin A interacting protein 1 [Source:HGNC Symbol;Acc:21015]	2.23118	0.684873	57.4896	3.39765e-14	2.8967e-13
ENSG00000152422	XRCC4	X-ray repair complementing defective repair in Chinese hamster cells 4 [Source:HGNC Symbol;Acc:12831]	-1.05513	3.49106	57.4866	3.40295e-14	2.89956e-13
ENSG00000138674	SEC31A	SEC31 homolog A (S. cerevisiae) [Source:HGNC Symbol;Acc:17052]	0.441599	8.04355	57.4704	3.43095e-14	2.92174e-13
ENSG00000104524	PYCRL	pyrroline-5-carboxylate reductase-like [Source:HGNC Symbol;Acc:25846]	-1.58998	2.40646	57.4564	3.45555e-14	2.94099e-13
ENSG00000132153	DHX30	DEAH (Asp-Glu-Ala-His) box polypeptide 30 [Source:HGNC Symbol;Acc:16716]	0.596365	7.17786	57.4525	3.46234e-14	2.94508e-13
ENSG00000109674	NEIL3	nei endonuclease VIII-like 3 (E. coli) [Source:HGNC Symbol;Acc:24573]	-0.831663	4.75525	57.4501	3.46664e-14	2.94705e-13
ENSG00000184319	AC002055.4		1.05164	3.54367	57.4378	3.48832e-14	2.96377e-13
ENSG00000160271	RALGDS	ral guanine nucleotide dissociation stimulator [Source:HGNC Symbol;Acc:9842]	0.647993	7.17156	57.4069	3.5437e-14	3.0091e-13
ENSG00000185838	GNB1L	guanine nucleotide binding protein (G protein), beta polypeptide 1-like [Source:HGNC Symbol;Acc:4397]	1.96682	1.42407	57.3681	3.61426e-14	3.06725e-13
ENSG00000078114	NEBL	nebulette [Source:HGNC Symbol;Acc:16932]	1.04362	3.26946	57.2841	3.77199e-14	3.19928e-13
ENSG00000149428	HYOU1	hypoxia up-regulated 1 [Source:HGNC Symbol;Acc:16931]	0.580662	6.76269	57.277	3.78547e-14	3.20887e-13
ENSG00000165659	DACH1	dachshund homolog 1 (Drosophila) [Source:HGNC Symbol;Acc:2663]	-0.606918	5.78846	57.2712	3.79669e-14	3.21654e-13
ENSG00000161091	MFSD12	major facilitator superfamily domain containing 12 [Source:HGNC Symbol;Acc:28299]	0.973698	4.13622	57.2673	3.80432e-14	3.22116e-13
ENSG00000121671	CRY2	cryptochrome 2 (photolyase-like) [Source:HGNC Symbol;Acc:2385]	1.02437	4.34374	57.1956	3.94555e-14	3.33884e-13
ENSG00000182372	CLN8	ceroid-lipofuscinosis, neuronal 8 (epilepsy, progressive with mental retardation) [Source:HGNC Symbol;Acc:2079]	0.778842	4.99185	57.1573	4.02321e-14	3.40261e-13
ENSG00000254726	MEX3A	mex-3 homolog A (C. elegans) [Source:HGNC Symbol;Acc:33482]	0.970017	5.94676	57.1245	4.09086e-14	3.45785e-13
ENSG00000145293	ENOPH1	enolase-phosphatase 1 [Source:HGNC Symbol;Acc:24599]	-0.563049	6.5732	57.1119	4.11709e-14	3.47804e-13
ENSG00000225539	AC018799.1		1.05557	3.25344	57.0827	4.17857e-14	3.52796e-13
ENSG00000205339	IPO7	importin 7 [Source:HGNC Symbol;Acc:9852]	-0.416429	9.27726	57.0791	4.18635e-14	3.53252e-13
ENSG00000164077	MON1A	MON1 homolog A (yeast) [Source:HGNC Symbol;Acc:28207]	1.17003	3.45475	57.0603	4.22657e-14	3.56442e-13
ENSG00000182580	EPHB3	EPH receptor B3 [Source:HGNC Symbol;Acc:3394]	1.42315	2.4398	57.0511	4.24636e-14	3.57907e-13
ENSG00000121774	KHDRBS1	KH domain containing, RNA binding, signal transduction associated 1 [Source:HGNC Symbol;Acc:18116]	-0.435616	8.8833	57.0311	4.2897e-14	3.61355e-13
ENSG00000049656	CLPTM1L	CLPTM1-like [Source:HGNC Symbol;Acc:24308]	0.541433	6.71338	57.0076	4.34129e-14	3.65493e-13
ENSG00000158773	USF1	upstream transcription factor 1 [Source:HGNC Symbol;Acc:12593]	0.583037	6.16528	56.9701	4.42484e-14	3.72216e-13
ENSG00000204149	AGAP6	ArfGAP with GTPase domain, ankyrin repeat and PH domain 6 [Source:HGNC Symbol;Acc:23466]	1.1375	2.96109	56.9695	4.42618e-14	3.72216e-13
ENSG00000144278	GALNT13	UDP-N-acetyl-alpha-D-galactosamine:polypeptide N-acetylgalactosaminyltransferase 13 (GalNAc-T13) [Source:HGNC Symbol;Acc:23242]	-0.52208	6.67091	56.9657	4.43486e-14	3.72735e-13
ENSG00000157064	NMNAT2	nicotinamide nucleotide adenylyltransferase 2 [Source:HGNC Symbol;Acc:16789]	0.663957	5.65011	56.9618	4.44369e-14	3.73265e-13
ENSG00000116584	ARHGEF2	Rho/Rac guanine nucleotide exchange factor (GEF) 2 [Source:HGNC Symbol;Acc:682]	0.491333	8.10985	56.9452	4.48128e-14	3.76209e-13
ENSG00000189367	KIAA0408	KIAA0408 [Source:HGNC Symbol;Acc:21636]	1.53379	2.15994	56.925	4.52756e-14	3.79879e-13
ENSG00000186919	ZACN	zinc activated ligand-gated ion channel [Source:HGNC Symbol;Acc:29504]	4.86932	-0.880295	56.8856	4.61916e-14	3.87345e-13
ENSG00000026025	VIM	vimentin [Source:HGNC Symbol;Acc:12692]	-0.395996	9.52367	56.761	4.92118e-14	4.12438e-13
ENSG00000134222	PSRC1	proline/serine-rich coiled-coil 1 [Source:HGNC Symbol;Acc:24472]	-0.790066	5.46742	56.7305	4.99819e-14	4.18655e-13
ENSG00000059769	DNAJC25	DnaJ (Hsp40) homolog, subfamily C , member 25 [Source:HGNC Symbol;Acc:34187]	0.848269	4.58558	56.6888	5.10538e-14	4.27392e-13
ENSG00000256223	ZNF10	zinc finger protein 10 [Source:HGNC Symbol;Acc:12879]	0.905489	4.25449	56.666	5.16497e-14	4.32136e-13
ENSG00000119471	HSDL2	hydroxysteroid dehydrogenase like 2 [Source:HGNC Symbol;Acc:18572]	-0.608561	6.13759	56.6355	5.24566e-14	4.38639e-13
ENSG00000143653	SCCPDH	saccharopine dehydrogenase (putative) [Source:HGNC Symbol;Acc:24275]	-0.542868	6.64884	56.5404	5.50555e-14	4.60111e-13
ENSG00000169255	B3GALNT1	beta-1,3-N-acetylgalactosaminyltransferase 1 (globoside blood group) [Source:HGNC Symbol;Acc:918]	-0.673082	5.47348	56.5321	5.52882e-14	4.61795e-13
ENSG00000124920	C11orf9	chromosome 11 open reading frame 9 [Source:HGNC Symbol;Acc:1181]	0.865744	4.80175	56.4285	5.8279e-14	4.86502e-13
ENSG00000114698	PLSCR4	phospholipid scramblase 4 [Source:HGNC Symbol;Acc:16497]	-1.62285	1.64108	56.4178	5.85982e-14	4.88891e-13
ENSG00000196476	C20orf96	chromosome 20 open reading frame 96 [Source:HGNC Symbol;Acc:16227]	0.833391	4.5518	56.4033	5.90323e-14	4.92235e-13
ENSG00000086589	RBM22	RNA binding motif protein 22 [Source:HGNC Symbol;Acc:25503]	0.513004	6.61275	56.3978	5.91962e-14	4.93324e-13
ENSG00000143862	ARL8A	ADP-ribosylation factor-like 8A [Source:HGNC Symbol;Acc:25192]	0.708521	5.05585	56.3928	5.93463e-14	4.94297e-13
ENSG00000171497	PPID	peptidylprolyl isomerase D [Source:HGNC Symbol;Acc:9257]	0.593813	6.95356	56.3252	6.14229e-14	5.11305e-13
ENSG00000178381	ZFAND2A	zinc finger, AN1-type domain 2A [Source:HGNC Symbol;Acc:28073]	1.20987	3.04337	56.3209	6.1558e-14	5.12141e-13
ENSG00000138279	ANXA7	annexin A7 [Source:HGNC Symbol;Acc:545]	-0.686855	5.31013	56.2912	6.24956e-14	5.1965e-13
ENSG00000156162	DPY19L4	dpy-19-like 4 (C. elegans) [Source:HGNC Symbol;Acc:27829]	-0.619462	5.9878	56.2787	6.28924e-14	5.22656e-13
ENSG00000120915	EPHX2	epoxide hydrolase 2, cytoplasmic [Source:HGNC Symbol;Acc:3402]	-1.39744	2.46644	56.2526	6.37334e-14	5.29348e-13
ENSG00000204790	CBWD6	COBW domain containing 6 [Source:HGNC Symbol;Acc:31978]	1.31564	2.63637	56.2153	6.49554e-14	5.39196e-13
ENSG00000005339	CREBBP	CREB binding protein [Source:HGNC Symbol;Acc:2348]	0.533717	7.34075	56.1778	6.62039e-14	5.49251e-13
ENSG00000083544	TDRD3	tudor domain containing 3 [Source:HGNC Symbol;Acc:20612]	-0.863838	4.82193	56.1564	6.69298e-14	5.54963e-13
ENSG00000145592	RPL37	ribosomal protein L37 [Source:HGNC Symbol;Acc:10347]	0.394116	9.53662	56.0739	6.97985e-14	5.78425e-13
ENSG00000142168	SOD1	superoxide dismutase 1, soluble [Source:HGNC Symbol;Acc:11179]	-0.429582	8.10781	55.9716	7.35245e-14	6.08962e-13
ENSG00000206053	HN1L	hematological and neurological expressed 1-like [Source:HGNC Symbol;Acc:14137]	-0.440796	7.70568	55.9554	7.41323e-14	6.13653e-13
ENSG00000157600	TMEM164	transmembrane protein 164 [Source:HGNC Symbol;Acc:26217]	-0.560058	6.33691	55.9473	7.44384e-14	6.15842e-13
ENSG00000197162	ZNF785	zinc finger protein 785 [Source:HGNC Symbol;Acc:26496]	0.966814	3.91827	55.9423	7.46301e-14	6.17084e-13
ENSG00000198721	ECI2	enoyl-CoA delta isomerase 2 [Source:HGNC Symbol;Acc:14601]	-0.700948	5.36627	55.9074	7.59677e-14	6.27793e-13
ENSG00000212769	HMGN2P8	high mobility group nucleosomal binding domain 2 pseudogene 8 [Source:HGNC Symbol;Acc:31662]	-1.31134	2.64493	55.8918	7.65717e-14	6.32432e-13
ENSG00000107816	LZTS2	leucine zipper, putative tumor suppressor 2 [Source:HGNC Symbol;Acc:29381]	0.730368	5.7106	55.8813	7.69799e-14	6.35449e-13
ENSG00000181544	FANCB	Fanconi anemia, complementation group B [Source:HGNC Symbol;Acc:3583]	-1.0227	3.89214	55.8658	7.75919e-14	6.40144e-13
ENSG00000041988	THAP3	THAP domain containing, apoptosis associated protein 3 [Source:HGNC Symbol;Acc:20855]	1.32843	2.44432	55.8411	7.85735e-14	6.47881e-13
ENSG00000113391	FAM172A	family with sequence similarity 172, member A [Source:HGNC Symbol;Acc:25365]	-0.868111	4.47335	55.7936	8.04937e-14	6.63345e-13
ENSG00000206252	AP000525.1	Uncharacterized protein [Source:UniProtKB/TrEMBL;Acc:B5MBW5]	1.42706	2.56247	55.7918	8.0565e-14	6.63563e-13
ENSG00000101493	ZNF516	zinc finger protein 516 [Source:HGNC Symbol;Acc:28990]	0.674781	5.58383	55.7691	8.15035e-14	6.7092e-13
ENSG00000156642	NPTN	neuroplastin [Source:HGNC Symbol;Acc:17867]	0.485227	7.32415	55.7471	8.24193e-14	6.78081e-13
ENSG00000078808	SDF4	stromal cell derived factor 4 [Source:HGNC Symbol;Acc:24188]	0.864889	4.51209	55.706	8.41598e-14	6.92017e-13
ENSG00000091651	ORC6	origin recognition complex, subunit 6 [Source:HGNC Symbol;Acc:17151]	-0.523942	6.57381	55.6437	8.68688e-14	7.13896e-13
ENSG00000204843	DCTN1	dynactin 1 [Source:HGNC Symbol;Acc:2711]	0.526383	7.50212	55.5944	8.90773e-14	7.31639e-13
ENSG00000178445	GLDC	glycine dehydrogenase (decarboxylating) [Source:HGNC Symbol;Acc:4313]	0.55375	6.16683	55.5791	8.97749e-14	7.36961e-13
ENSG00000108264	TADA2A	transcriptional adaptor 2A [Source:HGNC Symbol;Acc:11531]	-0.893873	4.29927	55.5729	9.00584e-14	7.38878e-13
ENSG00000196154	S100A4	S100 calcium binding protein A4 [Source:HGNC Symbol;Acc:10494]	2.59102	0.19878	55.5362	9.17517e-14	7.52354e-13
ENSG00000213462	ERV3-1	endogenous retrovirus group 3, member 1 [Source:HGNC Symbol;Acc:3454]	0.75528	4.87563	55.5326	9.19202e-14	7.53319e-13
ENSG00000177614	PGBD5	piggyBac transposable element derived 5 [Source:HGNC Symbol;Acc:19405]	-0.96482	3.87107	55.4959	9.36531e-14	7.67095e-13
ENSG00000122218	COPA	coatomer protein complex, subunit alpha [Source:HGNC Symbol;Acc:2230]	0.379676	9.82821	55.4736	9.47221e-14	7.75423e-13
ENSG00000079102	RUNX1T1	runt-related transcription factor 1; translocated to, 1 (cyclin D-related) [Source:HGNC Symbol;Acc:1535]	-0.671167	6.39365	55.4506	9.58393e-14	7.84135e-13
ENSG00000138835	RGS3	regulator of G-protein signaling 3 [Source:HGNC Symbol;Acc:9999]	1.22213	2.95732	55.4247	9.71096e-14	7.94089e-13
ENSG00000154096	THY1	Thy-1 cell surface antigen [Source:HGNC Symbol;Acc:11801]	1.00316	3.70897	55.4129	9.76957e-14	7.98441e-13
ENSG00000089248	ERP29	endoplasmic reticulum protein 29 [Source:HGNC Symbol;Acc:13799]	0.543092	6.45919	55.4056	9.80578e-14	8.00959e-13
ENSG00000104325	DECR1	2,4-dienoyl CoA reductase 1, mitochondrial [Source:HGNC Symbol;Acc:2753]	-0.668112	5.6081	55.3802	9.933e-14	8.10903e-13
ENSG00000132563	REEP2	receptor accessory protein 2 [Source:HGNC Symbol;Acc:17975]	1.23113	3.48515	55.3774	9.94711e-14	8.11608e-13
ENSG00000167971	CASKIN1	CASK interacting protein 1 [Source:HGNC Symbol;Acc:20879]	1.45215	2.28604	55.3575	1.00484e-13	8.19419e-13
ENSG00000233184	RP11-421L21.3		0.858359	4.22988	55.3562	1.00551e-13	8.19515e-13
ENSG00000205544	C17orf61	chromosome 17 open reading frame 61 [Source:HGNC Symbol;Acc:28618]	-1.61122	2.21548	55.3472	1.01013e-13	8.22827e-13
ENSG00000076201	PTPN23	protein tyrosine phosphatase, non-receptor type 23 [Source:HGNC Symbol;Acc:14406]	0.94188	4.995	55.3417	1.01296e-13	8.24676e-13
ENSG00000065534	MYLK	myosin light chain kinase [Source:HGNC Symbol;Acc:7590]	-0.91846	3.83634	55.3336	1.01715e-13	8.27638e-13
ENSG00000090372	STRN4	striatin, calmodulin binding protein 4 [Source:HGNC Symbol;Acc:15721]	0.732519	6.37385	55.2862	1.04198e-13	8.47378e-13
ENSG00000033627	ATP6V0A1	ATPase, H+ transporting, lysosomal V0 subunit a1 [Source:HGNC Symbol;Acc:865]	0.509457	6.58771	55.2104	1.08292e-13	8.80188e-13
ENSG00000223356	RP11-66D17.5		3.63746	-0.488595	55.1804	1.09959e-13	8.93241e-13
ENSG00000116574	RHOU	ras homolog family member U [Source:HGNC Symbol;Acc:17794]	-0.562637	6.49297	55.164	1.10882e-13	9.00249e-13
ENSG00000141542	RAB40B	RAB40B, member RAS oncogene family [Source:HGNC Symbol;Acc:18284]	-1.04499	3.47743	55.1328	1.12655e-13	9.1414e-13
ENSG00000090776	EFNB1	ephrin-B1 [Source:HGNC Symbol;Acc:3226]	1.34993	3.19322	55.1124	1.13829e-13	9.23115e-13
ENSG00000089154	GCN1L1	GCN1 general control of amino-acid synthesis 1-like 1 (yeast) [Source:HGNC Symbol;Acc:4199]	0.508719	8.16942	55.1115	1.13886e-13	9.23115e-13
ENSG00000167081	PBX3	pre-B-cell leukemia homeobox 3 [Source:HGNC Symbol;Acc:8634]	-0.66457	5.4912	55.02	1.19309e-13	9.6655e-13
ENSG00000204116	CHIC1	cysteine-rich hydrophobic domain 1 [Source:HGNC Symbol;Acc:1934]	1.13216	3.18155	55.0101	1.19912e-13	9.70898e-13
ENSG00000254470	AP5B1	adaptor-related protein complex 5, beta 1 subunit [Source:HGNC Symbol;Acc:25104]	1.57816	1.91662	55.0021	1.20401e-13	9.7433e-13
ENSG00000134532	SOX5	SRY (sex determining region Y)-box 5 [Source:HGNC Symbol;Acc:11201]	0.946971	4.0728	54.9273	1.25069e-13	1.01155e-12
ENSG00000007866	TEAD3	TEA domain family member 3 [Source:HGNC Symbol;Acc:11716]	0.867292	4.65262	54.8656	1.29059e-13	1.04325e-12
ENSG00000150593	PDCD4	programmed cell death 4 (neoplastic transformation inhibitor) [Source:HGNC Symbol;Acc:8763]	-0.651719	5.28042	54.7071	1.39901e-13	1.13028e-12
ENSG00000148110	HIATL1	hippocampus abundant transcript-like 1 [Source:HGNC Symbol;Acc:23376]	-0.564265	6.05159	54.6911	1.41043e-13	1.13888e-12
ENSG00000166225	FRS2	fibroblast growth factor receptor substrate 2 [Source:HGNC Symbol;Acc:16971]	0.590174	6.07842	54.6428	1.44555e-13	1.1666e-12
ENSG00000070423	RNF126	ring finger protein 126 [Source:HGNC Symbol;Acc:21151]	0.978772	4.02849	54.6325	1.4531e-13	1.17206e-12
ENSG00000154035	C17orf103	chromosome 17 open reading frame 103 [Source:HGNC Symbol;Acc:30770]	-1.85604	1.48368	54.5373	1.52526e-13	1.22959e-12
ENSG00000246922	UBAP1L	ubiquitin associated protein 1-like [Source:HGNC Symbol;Acc:40028]	1.89315	1.55746	54.4344	1.60722e-13	1.29496e-12
ENSG00000249307	RP11-438E5.1		-1.45412	1.96337	54.4051	1.63139e-13	1.31372e-12
ENSG00000072110	ACTN1	actinin, alpha 1 [Source:HGNC Symbol;Acc:163]	0.600087	6.13485	54.3754	1.6562e-13	1.33297e-12
ENSG00000213347	MXD3	MAX dimerization protein 3 [Source:HGNC Symbol;Acc:14008]	-1.62125	2.13038	54.349	1.67859e-13	1.35026e-12
ENSG00000188613	NANOS1	nanos homolog 1 (Drosophila) [Source:HGNC Symbol;Acc:23044]	-0.97022	3.7931	54.3361	1.68965e-13	1.35842e-12
ENSG00000234338	RP11-797H7.1		1.33142	2.7942	54.3323	1.69294e-13	1.36033e-12
ENSG00000055483	USP36	ubiquitin specific peptidase 36 [Source:HGNC Symbol;Acc:20062]	0.569995	6.6124	54.2563	1.75976e-13	1.41325e-12
ENSG00000125895	TMEM74B	transmembrane protein 74B [Source:HGNC Symbol;Acc:15893]	2.46889	0.610473	54.2277	1.78552e-13	1.43316e-12
ENSG00000142534	RPS11	ribosomal protein S11 [Source:HGNC Symbol;Acc:10384]	0.411708	10.0477	54.1624	1.84584e-13	1.48077e-12
ENSG00000064042	LIMCH1	LIM and calponin homology domains 1 [Source:HGNC Symbol;Acc:29191]	-0.622578	5.67577	54.148	1.85945e-13	1.49088e-12
ENSG00000127554	GFER	growth factor, augmenter of liver regeneration [Source:HGNC Symbol;Acc:4236]	1.03961	3.57914	54.1197	1.88638e-13	1.51166e-12
ENSG00000147852	VLDLR	very low density lipoprotein receptor [Source:HGNC Symbol;Acc:12698]	0.851684	4.74986	54.1124	1.89338e-13	1.51645e-12
ENSG00000244038	DDOST	dolichyl-diphosphooligosaccharide--protein glycosyltransferase [Source:HGNC Symbol;Acc:2728]	0.56935	6.09582	54.092	1.91316e-13	1.53146e-12
ENSG00000179837	RBM15B	RNA binding motif protein 15B [Source:HGNC Symbol;Acc:24303]	0.490799	7.3985	54.0816	1.9233e-13	1.53875e-12
ENSG00000183765	CHEK2	checkpoint kinase 2 [Source:HGNC Symbol;Acc:16627]	-0.81704	4.67804	54.0341	1.97038e-13	1.57556e-12
ENSG00000099194	SCD	stearoyl-CoA desaturase (delta-9-desaturase) [Source:HGNC Symbol;Acc:10571]	-0.386994	8.9951	54.0059	1.99892e-13	1.59752e-12
ENSG00000102547	CAB39L	calcium binding protein 39-like [Source:HGNC Symbol;Acc:20290]	1.19403	2.74786	54.0027	2.00219e-13	1.59926e-12
ENSG00000251596	HADHAP1	hydroxyacyl-CoA dehydrogenase/3-ketoacyl-CoA thiolase/enoyl-CoA hydratase (trifunctional protein), alpha subunit pseudogene 1 [Source:HGNC Symbol;Acc:4802]	1.83033	1.25309	53.9343	2.0731e-13	1.65502e-12
ENSG00000106799	TGFBR1	transforming growth factor, beta receptor 1 [Source:HGNC Symbol;Acc:11772]	-0.467839	7.24552	53.9281	2.07964e-13	1.65934e-12
ENSG00000137343	ATAT1	alpha tubulin acetyltransferase 1 [Source:HGNC Symbol;Acc:21186]	0.783607	5.13521	53.8905	2.11977e-13	1.69045e-12
ENSG00000106018	VIPR2	vasoactive intestinal peptide receptor 2 [Source:HGNC Symbol;Acc:12695]	3.46926	-0.603583	53.8844	2.12644e-13	1.69485e-12
ENSG00000182873	RP11-181G12.2		2.21957	1.45705	53.8694	2.14266e-13	1.70687e-12
ENSG00000181104	F2R	coagulation factor II (thrombin) receptor [Source:HGNC Symbol;Acc:3537]	0.528214	6.74177	53.847	2.16727e-13	1.72554e-12
ENSG00000153140	CETN3	centrin, EF-hand protein, 3 [Source:HGNC Symbol;Acc:1868]	-0.756228	5.24442	53.8387	2.17648e-13	1.73194e-12
ENSG00000020922	MRE11A	MRE11 meiotic recombination 11 homolog A (S. cerevisiae) [Source:HGNC Symbol;Acc:7230]	-0.647759	5.42323	53.8324	2.18341e-13	1.73652e-12
ENSG00000198563	DDX39B	DEAD (Asp-Glu-Ala-Asp) box polypeptide 39B [Source:HGNC Symbol;Acc:13917]	0.494495	7.41306	53.8276	2.18877e-13	1.73986e-12
ENSG00000141576	RNF157	ring finger protein 157 [Source:HGNC Symbol;Acc:29402]	-0.51457	6.67498	53.8133	2.20475e-13	1.75162e-12
ENSG00000136271	DDX56	DEAD (Asp-Glu-Ala-Asp) box helicase 56 [Source:HGNC Symbol;Acc:18193]	0.500432	6.79172	53.7799	2.24256e-13	1.7807e-12
ENSG00000120328	PCDHB12	protocadherin beta 12 [Source:HGNC Symbol;Acc:8683]	1.03532	3.20944	53.7583	2.26734e-13	1.79942e-12
ENSG00000181218	HIST3H2A	histone cluster 3, H2a [Source:HGNC Symbol;Acc:20507]	2.15287	1.33121	53.7522	2.27439e-13	1.80404e-12
ENSG00000206149	HERC2P9	hect domain and RLD 2 pseudogene 9 [Source:HGNC Symbol;Acc:30495]	0.885049	4.16226	53.7244	2.30683e-13	1.82879e-12
ENSG00000153443	FAM100A	family with sequence similarity 100, member A [Source:HGNC Symbol;Acc:29576]	1.11477	3.02807	53.7119	2.3215e-13	1.83944e-12
ENSG00000130559	CAMSAP1	calmodulin regulated spectrin-associated protein 1 [Source:HGNC Symbol;Acc:19946]	0.479233	7.1551	53.672	2.36913e-13	1.87618e-12
ENSG00000221978	CCNL2	cyclin L2 [Source:HGNC Symbol;Acc:20570]	-0.51491	6.76098	53.639	2.40934e-13	1.907e-12
ENSG00000120314	WDR55	WD repeat domain 55 [Source:HGNC Symbol;Acc:25971]	0.709171	5.06098	53.628	2.42282e-13	1.91664e-12
ENSG00000139737	SLAIN1	SLAIN motif family, member 1 [Source:HGNC Symbol;Acc:26387]	0.453978	8.02854	53.6188	2.43414e-13	1.92457e-12
ENSG00000168906	MAT2A	methionine adenosyltransferase II, alpha [Source:HGNC Symbol;Acc:6904]	-0.385207	9.38985	53.6174	2.43587e-13	1.92491e-12
ENSG00000166925	TSC22D4	TSC22 domain family, member 4 [Source:HGNC Symbol;Acc:21696]	1.31489	3.3595	53.5536	2.51634e-13	1.98744e-12
ENSG00000162437	RAVER2	ribonucleoprotein, PTB-binding 2 [Source:HGNC Symbol;Acc:25577]	-0.505895	6.74659	53.5495	2.52158e-13	1.99051e-12
ENSG00000104904	OAZ1	ornithine decarboxylase antizyme 1 [Source:HGNC Symbol;Acc:8095]	0.505284	7.66368	53.4769	2.61656e-13	2.06439e-12
ENSG00000125675	GRIA3	glutamate receptor, ionotropic, AMPA 3 [Source:HGNC Symbol;Acc:4573]	1.54066	1.80461	53.4689	2.62714e-13	2.07163e-12
ENSG00000197050	ZNF420	zinc finger protein 420 [Source:HGNC Symbol;Acc:20649]	0.771303	4.7082	53.4445	2.66e-13	2.09643e-12
ENSG00000185697	MYBL1	v-myb myeloblastosis viral oncogene homolog (avian)-like 1 [Source:HGNC Symbol;Acc:7547]	-1.16106	3.65521	53.4285	2.68179e-13	2.11248e-12
ENSG00000167074	TEF	thyrotrophic embryonic factor [Source:HGNC Symbol;Acc:11722]	0.969108	3.963	53.3992	2.72207e-13	2.14307e-12
ENSG00000165338	HECTD2	HECT domain containing E3 ubiquitin protein ligase 2 [Source:HGNC Symbol;Acc:26736]	-0.689743	5.26972	53.3886	2.73678e-13	2.1535e-12
ENSG00000169905	TOR1AIP2	torsin A interacting protein 2 [Source:HGNC Symbol;Acc:24055]	0.475129	6.87291	53.375	2.75587e-13	2.16738e-12
ENSG00000013293	SLC7A14	solute carrier family 7 (orphan transporter), member 14 [Source:HGNC Symbol;Acc:29326]	0.876577	4.47785	53.3662	2.76813e-13	2.17495e-12
ENSG00000176974	SHMT1	serine hydroxymethyltransferase 1 (soluble) [Source:HGNC Symbol;Acc:10850]	-0.81772	4.91546	53.366	2.76844e-13	2.17495e-12
ENSG00000182087	C19orf6	chromosome 19 open reading frame 6 [Source:HGNC Symbol;Acc:17039]	0.800246	5.73117	53.3255	2.82612e-13	2.21909e-12
ENSG00000184900	SUMO3	SMT3 suppressor of mif two 3 homolog 3 (S. cerevisiae) [Source:HGNC Symbol;Acc:11124]	0.610202	5.91494	53.3154	2.84064e-13	2.22931e-12
ENSG00000144028	SNRNP200	small nuclear ribonucleoprotein 200kDa (U5) [Source:HGNC Symbol;Acc:30859]	0.426953	9.46311	53.3083	2.85101e-13	2.23626e-12
ENSG00000128245	YWHAH	tyrosine 3-monooxygenase/tryptophan 5-monooxygenase activation protein, eta polypeptide [Source:HGNC Symbol;Acc:12853]	-0.442633	7.46923	53.25	2.93694e-13	2.30244e-12
ENSG00000100234	TIMP3	TIMP metallopeptidase inhibitor 3 [Source:HGNC Symbol;Acc:11822]	0.806956	4.63164	53.2473	2.94085e-13	2.30429e-12
ENSG00000198892	SHISA4	shisa homolog 4 (Xenopus laevis) [Source:HGNC Symbol;Acc:27139]	2.20493	1.11475	53.2151	2.98957e-13	2.34122e-12
ENSG00000237977	RP3-430N8.8		1.68174	1.60854	53.2081	3.00019e-13	2.3483e-12
ENSG00000211448	DIO2	deiodinase, iodothyronine, type II [Source:HGNC Symbol;Acc:2884]	-1.85141	0.85341	53.1421	3.10263e-13	2.4272e-12
ENSG00000105671	DDX49	DEAD (Asp-Glu-Ala-Asp) box polypeptide 49 [Source:HGNC Symbol;Acc:18684]	0.736505	5.22132	53.1271	3.12642e-13	2.44452e-12
ENSG00000111725	PRKAB1	protein kinase, AMP-activated, beta 1 non-catalytic subunit [Source:HGNC Symbol;Acc:9378]	0.720866	4.9793	53.1187	3.13982e-13	2.4537e-12
ENSG00000011523	CEP68	centrosomal protein 68kDa [Source:HGNC Symbol;Acc:29076]	-0.599305	5.87287	53.0891	3.1876e-13	2.48972e-12
ENSG00000125944	HNRNPR	heterogeneous nuclear ribonucleoprotein R [Source:HGNC Symbol;Acc:5047]	-0.422582	8.5208	53.064	3.2285e-13	2.52034e-12
ENSG00000213593	TMX2	thioredoxin-related transmembrane protein 2 [Source:HGNC Symbol;Acc:30739]	0.467773	6.9233	53.0476	3.25562e-13	2.54017e-12
ENSG00000112290	WASF1	WAS protein family, member 1 [Source:HGNC Symbol;Acc:12732]	-0.420494	8.21118	53.0281	3.28808e-13	2.56415e-12
ENSG00000112249	ASCC3	activating signal cointegrator 1 complex subunit 3 [Source:HGNC Symbol;Acc:18697]	0.443111	7.71057	52.9995	3.33639e-13	2.60045e-12
ENSG00000083067	TRPM3	transient receptor potential cation channel, subfamily M, member 3 [Source:HGNC Symbol;Acc:17992]	1.94249	1.66463	52.995	3.34398e-13	2.605e-12
ENSG00000164733	CTSB	cathepsin B [Source:HGNC Symbol;Acc:2527]	0.623221	5.81017	52.9836	3.36338e-13	2.61873e-12
ENSG00000072121	ZFYVE26	zinc finger, FYVE domain containing 26 [Source:HGNC Symbol;Acc:20761]	0.593957	5.82079	52.9674	3.39129e-13	2.63908e-12
ENSG00000120071	KANSL1	KAT8 regulatory NSL complex subunit 1 [Source:HGNC Symbol;Acc:24565]	0.437963	7.51024	52.943	3.4337e-13	2.67068e-12
ENSG00000140521	POLG	polymerase (DNA directed), gamma [Source:HGNC Symbol;Acc:9179]	0.644233	6.22163	52.9275	3.46082e-13	2.69036e-12
ENSG00000198925	ATG9A	autophagy related 9A [Source:HGNC Symbol;Acc:22408]	0.714796	4.9949	52.9247	3.4659e-13	2.69289e-12
ENSG00000136231	IGF2BP3	insulin-like growth factor 2 mRNA binding protein 3 [Source:HGNC Symbol;Acc:28868]	-0.522871	6.37013	52.9172	3.47913e-13	2.70175e-12
ENSG00000158186	MRAS	muscle RAS oncogene homolog [Source:HGNC Symbol;Acc:7227]	0.5708	5.8646	52.9075	3.49625e-13	2.71362e-12
ENSG00000164116	GUCY1A3	guanylate cyclase 1, soluble, alpha 3 [Source:HGNC Symbol;Acc:4685]	0.648582	5.46193	52.8119	3.67063e-13	2.84748e-12
ENSG00000006194	ZNF263	zinc finger protein 263 [Source:HGNC Symbol;Acc:13056]	0.650715	5.57208	52.7711	3.74774e-13	2.90578e-12
ENSG00000162923	WDR26	WD repeat domain 26 [Source:HGNC Symbol;Acc:21208]	0.425169	7.91034	52.6608	3.96419e-13	3.07198e-12
ENSG00000078902	TOLLIP	toll interacting protein [Source:HGNC Symbol;Acc:16476]	0.903869	4.48964	52.6528	3.9805e-13	3.08301e-12
ENSG00000167549	CORO6	coronin 6 [Source:HGNC Symbol;Acc:21356]	-1.91483	1.56833	52.6509	3.98428e-13	3.08433e-12
ENSG00000185565	LSAMP	limbic system-associated membrane protein [Source:HGNC Symbol;Acc:6705]	-0.938969	4.06399	52.5954	4.09843e-13	3.17104e-12
ENSG00000149294	NCAM1	neural cell adhesion molecule 1 [Source:HGNC Symbol;Acc:7656]	-0.482159	6.70281	52.5755	4.14027e-13	3.20173e-12
ENSG00000103653	CSK	c-src tyrosine kinase [Source:HGNC Symbol;Acc:2444]	0.665231	5.72955	52.559	4.17512e-13	3.227e-12
ENSG00000204371	EHMT2	euchromatic histone-lysine N-methyltransferase 2 [Source:HGNC Symbol;Acc:14129]	0.642921	6.75409	52.5499	4.19462e-13	3.24039e-12
ENSG00000184602	SNN	stannin [Source:HGNC Symbol;Acc:11149]	0.631648	5.53556	52.5189	4.26133e-13	3.2902e-12
ENSG00000116120	FARSB	phenylalanyl-tRNA synthetase, beta subunit [Source:HGNC Symbol;Acc:17800]	-0.501194	7.04343	52.5111	4.27818e-13	3.30149e-12
ENSG00000116017	ARID3A	AT rich interactive domain 3A (BRIGHT-like) [Source:HGNC Symbol;Acc:3031]	1.04485	3.72404	52.5003	4.30181e-13	3.318e-12
ENSG00000181826	RELL1	RELT-like 1 [Source:HGNC Symbol;Acc:27379]	-1.76946	1.43642	52.4402	4.43554e-13	3.41936e-12
ENSG00000158062	UBXN11	UBX domain protein 11 [Source:HGNC Symbol;Acc:30600]	-1.16227	3.29465	52.4114	4.50102e-13	3.46804e-12
ENSG00000182985	CADM1	cell adhesion molecule 1 [Source:HGNC Symbol;Acc:5951]	0.684459	5.08741	52.4052	4.51518e-13	3.47713e-12
ENSG00000239665	RP11-295P9.3		1.54738	1.79823	52.4012	4.52448e-13	3.48248e-12
ENSG00000162775	RBM15	RNA binding motif protein 15 [Source:HGNC Symbol;Acc:14959]	0.737086	5.01225	52.3071	4.74645e-13	3.65144e-12
ENSG00000143224	PPOX	protoporphyrinogen oxidase [Source:HGNC Symbol;Acc:9280]	-0.910916	4.14435	52.3057	4.74991e-13	3.6522e-12
ENSG00000116698	SMG7	smg-7 homolog, nonsense mediated mRNA decay factor (C. elegans) [Source:HGNC Symbol;Acc:16792]	0.410398	7.95799	52.2664	4.84603e-13	3.72417e-12
ENSG00000129038	LOXL1	lysyl oxidase-like 1 [Source:HGNC Symbol;Acc:6665]	-0.802757	5.10729	52.2455	4.89781e-13	3.76202e-12
ENSG00000142751	GPN2	GPN-loop GTPase 2 [Source:HGNC Symbol;Acc:25513]	1.01165	3.72609	52.243	4.90406e-13	3.76487e-12
ENSG00000116670	MAD2L2	MAD2 mitotic arrest deficient-like 2 (yeast) [Source:HGNC Symbol;Acc:6764]	-0.851791	4.54635	52.172	5.08469e-13	3.90151e-12
ENSG00000060982	BCAT1	branched chain amino-acid transaminase 1, cytosolic [Source:HGNC Symbol;Acc:976]	0.378108	9.2626	52.1703	5.08895e-13	3.90276e-12
ENSG00000101181	GTPBP5	GTP binding protein 5 (putative) [Source:HGNC Symbol;Acc:16239]	0.834062	4.58265	52.1473	5.149e-13	3.94677e-12
ENSG00000158373	HIST1H2BD	histone cluster 1, H2bd [Source:HGNC Symbol;Acc:4747]	1.53263	2.28801	52.1171	5.22886e-13	4.00591e-12
ENSG00000164099	PRSS12	protease, serine, 12 (neurotrypsin, motopsin) [Source:HGNC Symbol;Acc:9477]	0.427381	8.61425	52.1155	5.23303e-13	4.00703e-12
ENSG00000186472	PCLO	piccolo (presynaptic cytomatrix protein) [Source:HGNC Symbol;Acc:13406]	0.774737	4.51711	52.0857	5.31298e-13	4.06615e-12
ENSG00000156374	PCGF6	polycomb group ring finger 6 [Source:HGNC Symbol;Acc:21156]	-0.705531	5.54803	52.0706	5.35409e-13	4.09549e-12
ENSG00000145191	EIF2B5	eukaryotic translation initiation factor 2B, subunit 5 epsilon, 82kDa [Source:HGNC Symbol;Acc:3261]	0.483629	6.77718	52.0013	5.54649e-13	4.24048e-12
ENSG00000112893	MAN2A1	mannosidase, alpha, class 2A, member 1 [Source:HGNC Symbol;Acc:6824]	-0.470514	7.25936	51.9777	5.61354e-13	4.28952e-12
ENSG00000136100	VPS36	vacuolar protein sorting 36 homolog (S. cerevisiae) [Source:HGNC Symbol;Acc:20312]	-0.529294	6.5023	51.9572	5.67231e-13	4.33219e-12
ENSG00000128585	MKLN1	muskelin 1, intracellular mediator containing kelch motifs [Source:HGNC Symbol;Acc:7109]	0.451241	7.46639	51.8985	5.84442e-13	4.46134e-12
ENSG00000189067	LITAF	lipopolysaccharide-induced TNF factor [Source:HGNC Symbol;Acc:16841]	0.986039	3.46005	51.8764	5.91055e-13	4.5095e-12
ENSG00000136631	VPS45	vacuolar protein sorting 45 homolog (S. cerevisiae) [Source:HGNC Symbol;Acc:14579]	-0.412634	8.16885	51.8675	5.9375e-13	4.52772e-12
ENSG00000052749	RRP12	ribosomal RNA processing 12 homolog (S. cerevisiae) [Source:HGNC Symbol;Acc:29100]	0.735341	5.85917	51.8582	5.96566e-13	4.54686e-12
ENSG00000180592	SKIDA1	SKI/DACH domain containing 1 [Source:HGNC Symbol;Acc:32697]	0.860492	4.09821	51.8451	6.00561e-13	4.57495e-12
ENSG00000136816	TOR1B	torsin family 1, member B (torsin B) [Source:HGNC Symbol;Acc:11995]	0.747575	4.68515	51.8407	6.01915e-13	4.58249e-12
ENSG00000160888	IER2	immediate early response 2 [Source:HGNC Symbol;Acc:28871]	0.962357	4.04946	51.8399	6.02169e-13	4.58249e-12
ENSG00000184634	MED12	mediator complex subunit 12 [Source:HGNC Symbol;Acc:11957]	0.593775	6.61366	51.8276	6.05938e-13	4.6088e-12
ENSG00000176641	RNF152	ring finger protein 152 [Source:HGNC Symbol;Acc:26811]	1.3293	2.74807	51.8252	6.06671e-13	4.61201e-12
ENSG00000168758	SEMA4C	sema domain, immunoglobulin domain (Ig), transmembrane domain (TM) and short cytoplasmic domain, (semaphorin) 4C [Source:HGNC Symbol;Acc:10731]	0.776615	5.34177	51.8199	6.08309e-13	4.62209e-12
ENSG00000186310	NAP1L3	nucleosome assembly protein 1-like 3 [Source:HGNC Symbol;Acc:7639]	-0.715762	4.9858	51.7722	6.23284e-13	4.73344e-12
ENSG00000167378	IRGQ	immunity-related GTPase family, Q [Source:HGNC Symbol;Acc:24868]	0.596238	5.74059	51.7575	6.2797e-13	4.76658e-12
ENSG00000104866	PPP1R37	protein phosphatase 1, regulatory subunit 37 [Source:HGNC Symbol;Acc:27607]	1.02289	4.19716	51.703	6.45641e-13	4.89821e-12
ENSG00000130165	ELOF1	elongation factor 1 homolog (S. cerevisiae) [Source:HGNC Symbol;Acc:28691]	0.889703	4.79245	51.6845	6.51736e-13	4.94192e-12
ENSG00000240344	PPIL3	peptidylprolyl isomerase (cyclophilin)-like 3 [Source:HGNC Symbol;Acc:9262]	-0.87853	4.55841	51.667	6.5759e-13	4.98375e-12
ENSG00000162944	RFTN2	raftlin family member 2 [Source:HGNC Symbol;Acc:26402]	3.6819	-0.779965	51.6471	6.64281e-13	5.03189e-12
ENSG00000164818	HEATR2	HEAT repeat containing 2 [Source:HGNC Symbol;Acc:26013]	0.599528	5.84484	51.6282	6.70718e-13	5.07805e-12
ENSG00000180398	MCFD2	multiple coagulation factor deficiency 2 [Source:HGNC Symbol;Acc:18451]	0.447933	7.3509	51.5506	6.97741e-13	5.27994e-12
ENSG00000197122	SRC	v-src sarcoma (Schmidt-Ruppin A-2) viral oncogene homolog (avian) [Source:HGNC Symbol;Acc:11283]	0.796701	5.01535	51.5455	6.99553e-13	5.29095e-12
ENSG00000163913	IFT122	intraflagellar transport 122 homolog (Chlamydomonas) [Source:HGNC Symbol;Acc:13556]	-0.88484	4.2093	51.5329	7.04067e-13	5.32237e-12
ENSG00000197275	RAD54B	RAD54 homolog B (S. cerevisiae) [Source:HGNC Symbol;Acc:17228]	-0.700873	5.2954	51.5167	7.09892e-13	5.36367e-12
ENSG00000103154	NECAB2	N-terminal EF-hand calcium binding protein 2 [Source:HGNC Symbol;Acc:23746]	-2.7087	0.423584	51.5119	7.11643e-13	5.37415e-12
ENSG00000035403	VCL	vinculin [Source:HGNC Symbol;Acc:12665]	0.509368	7.01759	51.4933	7.18418e-13	5.42255e-12
ENSG00000203849	AL583842.6		1.40925	2.21357	51.4685	7.27538e-13	5.4886e-12
ENSG00000130518	KIAA1683	KIAA1683 [Source:HGNC Symbol;Acc:29350]	2.72648	0.30862	51.4272	7.43005e-13	5.60242e-12
ENSG00000197381	ADARB1	adenosine deaminase, RNA-specific, B1 [Source:HGNC Symbol;Acc:226]	0.720554	5.00471	51.3993	7.53669e-13	5.67994e-12
ENSG00000137776	SLTM	SAFB-like, transcription modulator [Source:HGNC Symbol;Acc:20709]	0.409399	8.38528	51.3693	7.65273e-13	5.76446e-12
ENSG00000224531	C6orf228	chromosome 6 open reading frame 228 [Source:HGNC Symbol;Acc:27356]	-0.582303	6.16254	51.3543	7.71133e-13	5.80397e-12
ENSG00000173281	PPP1R3B	protein phosphatase 1, regulatory subunit 3B [Source:HGNC Symbol;Acc:14942]	0.832809	4.24149	51.3536	7.71417e-13	5.80397e-12
ENSG00000065833	ME1	malic enzyme 1, NADP(+)-dependent, cytosolic [Source:HGNC Symbol;Acc:6983]	0.955082	3.50784	51.3529	7.71695e-13	5.80397e-12
ENSG00000238249	HMGN2P17	high mobility group nucleosomal binding domain 2 pseudogene 17 [Source:HGNC Symbol;Acc:39381]	-1.62362	1.80975	51.3188	7.85196e-13	5.90252e-12
ENSG00000085415	SEH1L	SEH1-like (S. cerevisiae) [Source:HGNC Symbol;Acc:30379]	-0.495539	6.85566	51.2677	8.05916e-13	6.05521e-12
ENSG00000106976	DNM1	dynamin 1 [Source:HGNC Symbol;Acc:2972]	-0.919631	4.69547	51.2661	8.06583e-13	6.05714e-12
ENSG00000115808	STRN	striatin, calmodulin binding protein [Source:HGNC Symbol;Acc:11424]	-0.559427	6.0816	51.234	8.19863e-13	6.15375e-12
ENSG00000172795	DCP2	DCP2 decapping enzyme homolog (S. cerevisiae) [Source:HGNC Symbol;Acc:24452]	-0.522184	6.71005	51.2089	8.3041e-13	6.22976e-12
ENSG00000075303	SLC25A40	solute carrier family 25, member 40 [Source:HGNC Symbol;Acc:29680]	-0.745027	4.98508	51.1854	8.4041e-13	6.30159e-12
ENSG00000119711	ALDH6A1	aldehyde dehydrogenase 6 family, member A1 [Source:HGNC Symbol;Acc:7179]	-0.84585	4.19258	51.1806	8.42477e-13	6.31389e-12
ENSG00000105429	MEGF8	multiple EGF-like-domains 8 [Source:HGNC Symbol;Acc:3233]	0.721768	5.96185	51.1391	8.60469e-13	6.44547e-12
ENSG00000184384	MAML2	mastermind-like 2 (Drosophila) [Source:HGNC Symbol;Acc:16259]	1.19791	2.74815	51.1253	8.66525e-13	6.48755e-12
ENSG00000129925	TMEM8A	transmembrane protein 8A [Source:HGNC Symbol;Acc:17205]	0.938709	4.15076	51.0978	8.7877e-13	6.5759e-12
ENSG00000160310	PRMT2	protein arginine methyltransferase 2 [Source:HGNC Symbol;Acc:5186]	0.566885	6.06377	51.0779	8.87704e-13	6.6394e-12
ENSG00000057657	PRDM1	PR domain containing 1, with ZNF domain [Source:HGNC Symbol;Acc:9346]	4.08222	-0.958586	51.0643	8.93902e-13	6.68238e-12
ENSG00000133958	UNC79	unc-79 homolog (C. elegans) [Source:HGNC Symbol;Acc:19966]	0.950329	3.73526	50.9893	9.28721e-13	6.93916e-12
ENSG00000152092	ASTN1	astrotactin 1 [Source:HGNC Symbol;Acc:773]	1.76402	1.93041	50.9595	9.42936e-13	7.04183e-12
ENSG00000116604	MEF2D	myocyte enhancer factor 2D [Source:HGNC Symbol;Acc:6997]	0.729908	6.36186	50.736	1.05661e-12	7.88679e-12
ENSG00000213047	DENND1B	DENN/MADD domain containing 1B [Source:HGNC Symbol;Acc:28404]	0.971464	3.81907	50.7301	1.05983e-12	7.90679e-12
ENSG00000113456	RAD1	RAD1 homolog (S. pombe) [Source:HGNC Symbol;Acc:9806]	-0.606139	6.15525	50.7085	1.07156e-12	7.99032e-12
ENSG00000172575	RASGRP1	RAS guanyl releasing protein 1 (calcium and DAG-regulated) [Source:HGNC Symbol;Acc:9878]	1.77565	1.9498	50.7037	1.07419e-12	8.00591e-12
ENSG00000101191	DIDO1	death inducer-obliterator 1 [Source:HGNC Symbol;Acc:2680]	0.517164	7.21606	50.61	1.12669e-12	8.39291e-12
ENSG00000136425	CIB2	calcium and integrin binding family member 2 [Source:HGNC Symbol;Acc:24579]	-1.08042	3.39285	50.5951	1.13531e-12	8.45288e-12
ENSG00000144655	CSRNP1	cysteine-serine-rich nuclear protein 1 [Source:HGNC Symbol;Acc:14300]	1.06478	3.33322	50.5845	1.14142e-12	8.49408e-12
ENSG00000159023	EPB41	erythrocyte membrane protein band 4.1 (elliptocytosis 1, RH-linked) [Source:HGNC Symbol;Acc:3377]	-0.419278	7.73772	50.573	1.14811e-12	8.53962e-12
[truncated: 7,074 more rows]
